# Supplementary material for: Unique structure and positive selection promote the rapid divergence of Drosophila Y chromosomes
Source: eLife journal article supplement (doi:10.7554/elife.75795), 2022-01-06

# *Drosophila melanogaster*

Normalized coverage

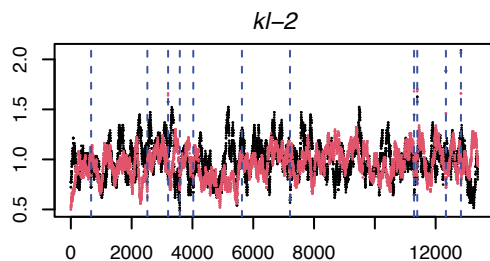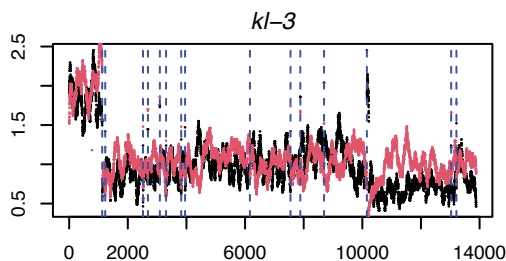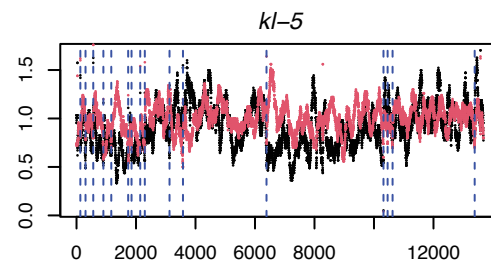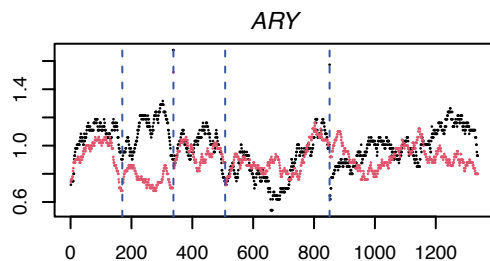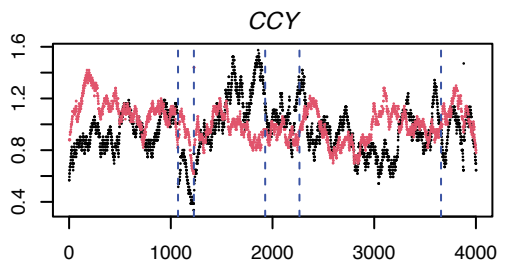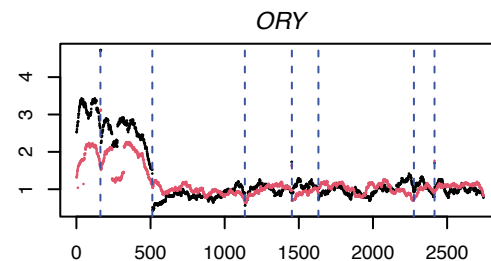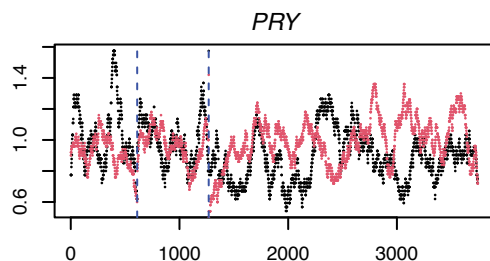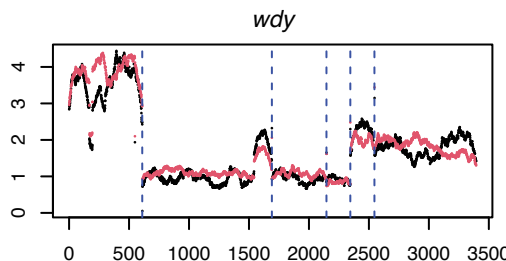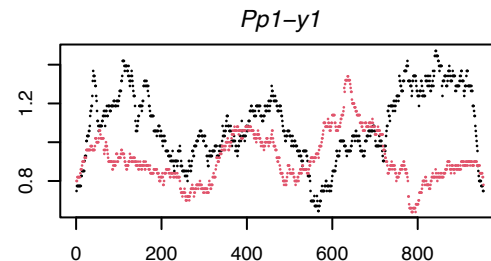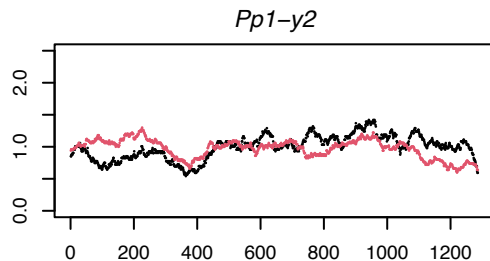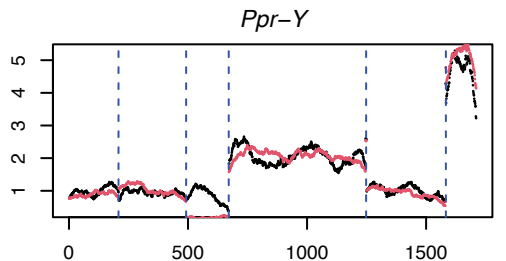

— Illumina reads from males  
— Simulated Illumina reads  
from the assembly

# *Drosophila mauritiana*

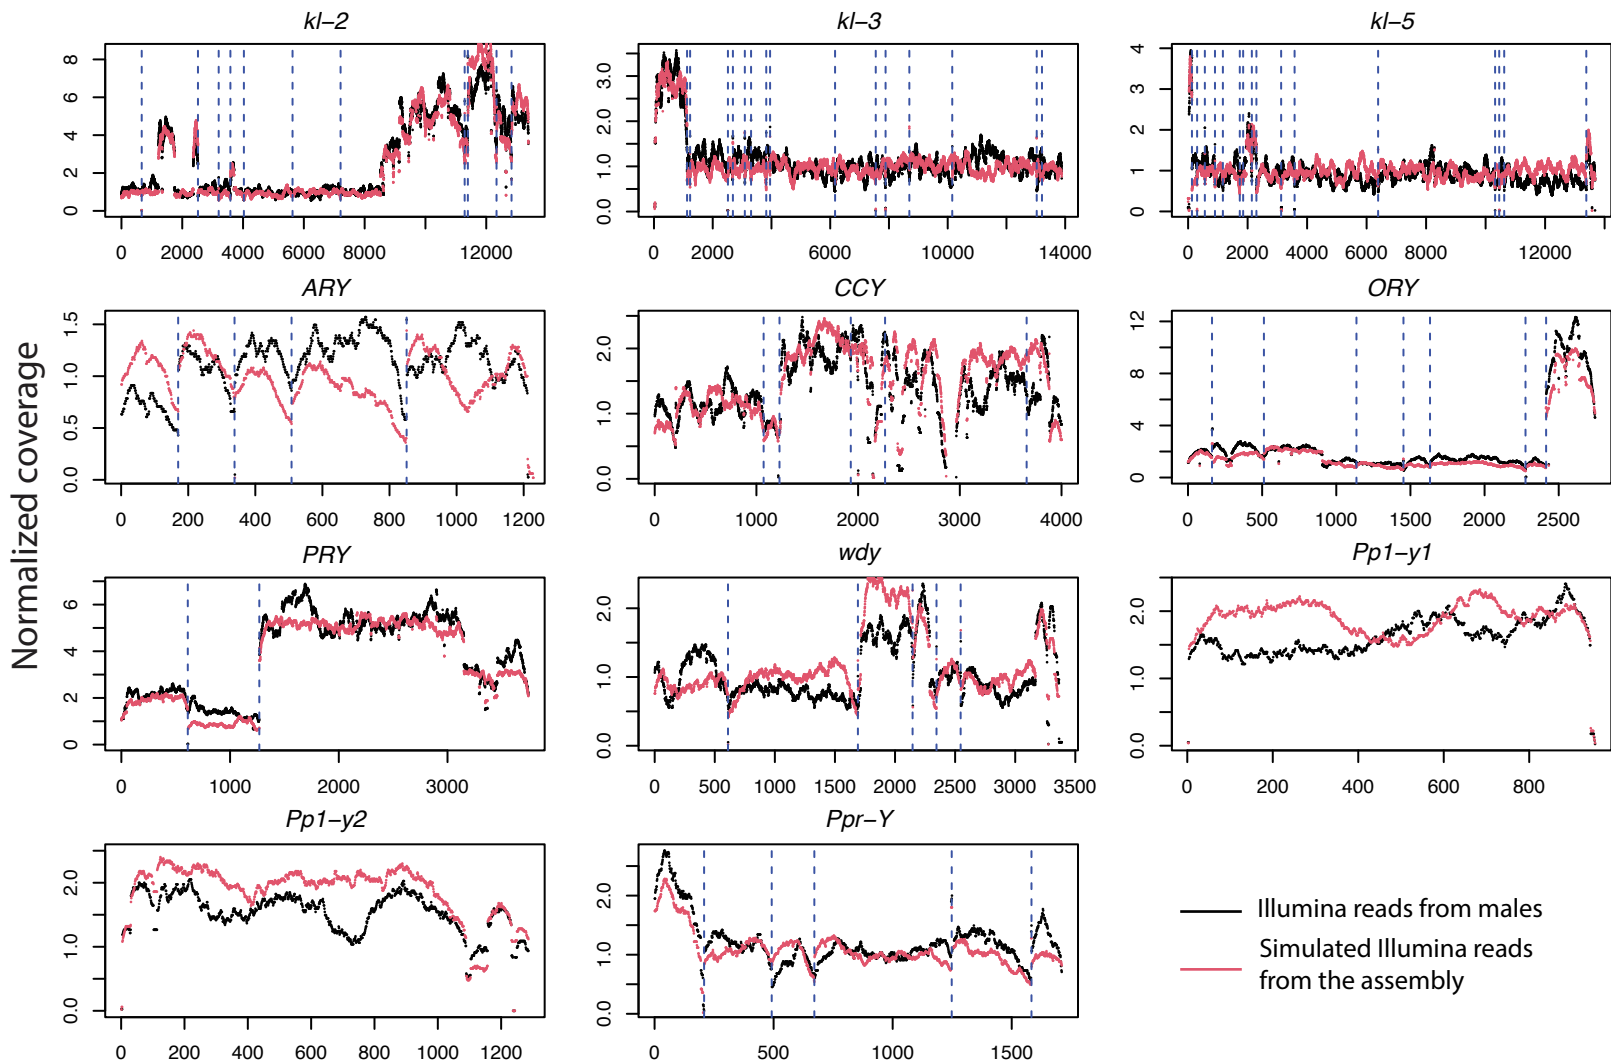

# *Drosophila simulans*

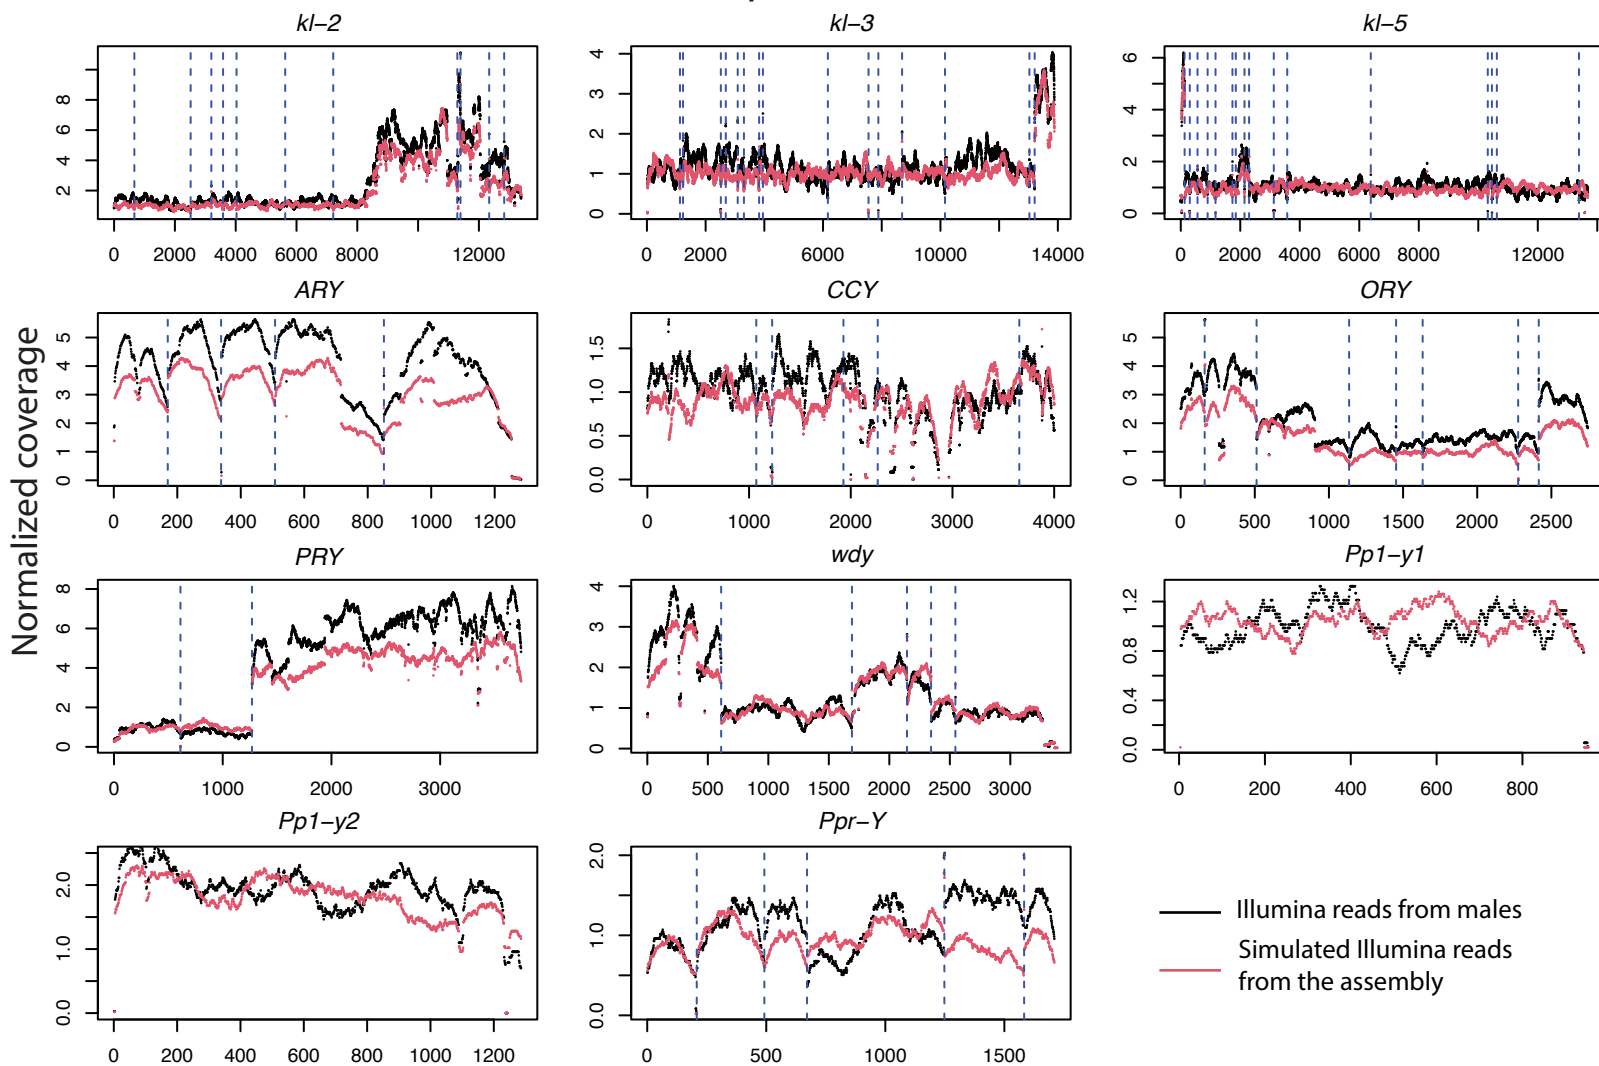

# *Drosophila sechellia*

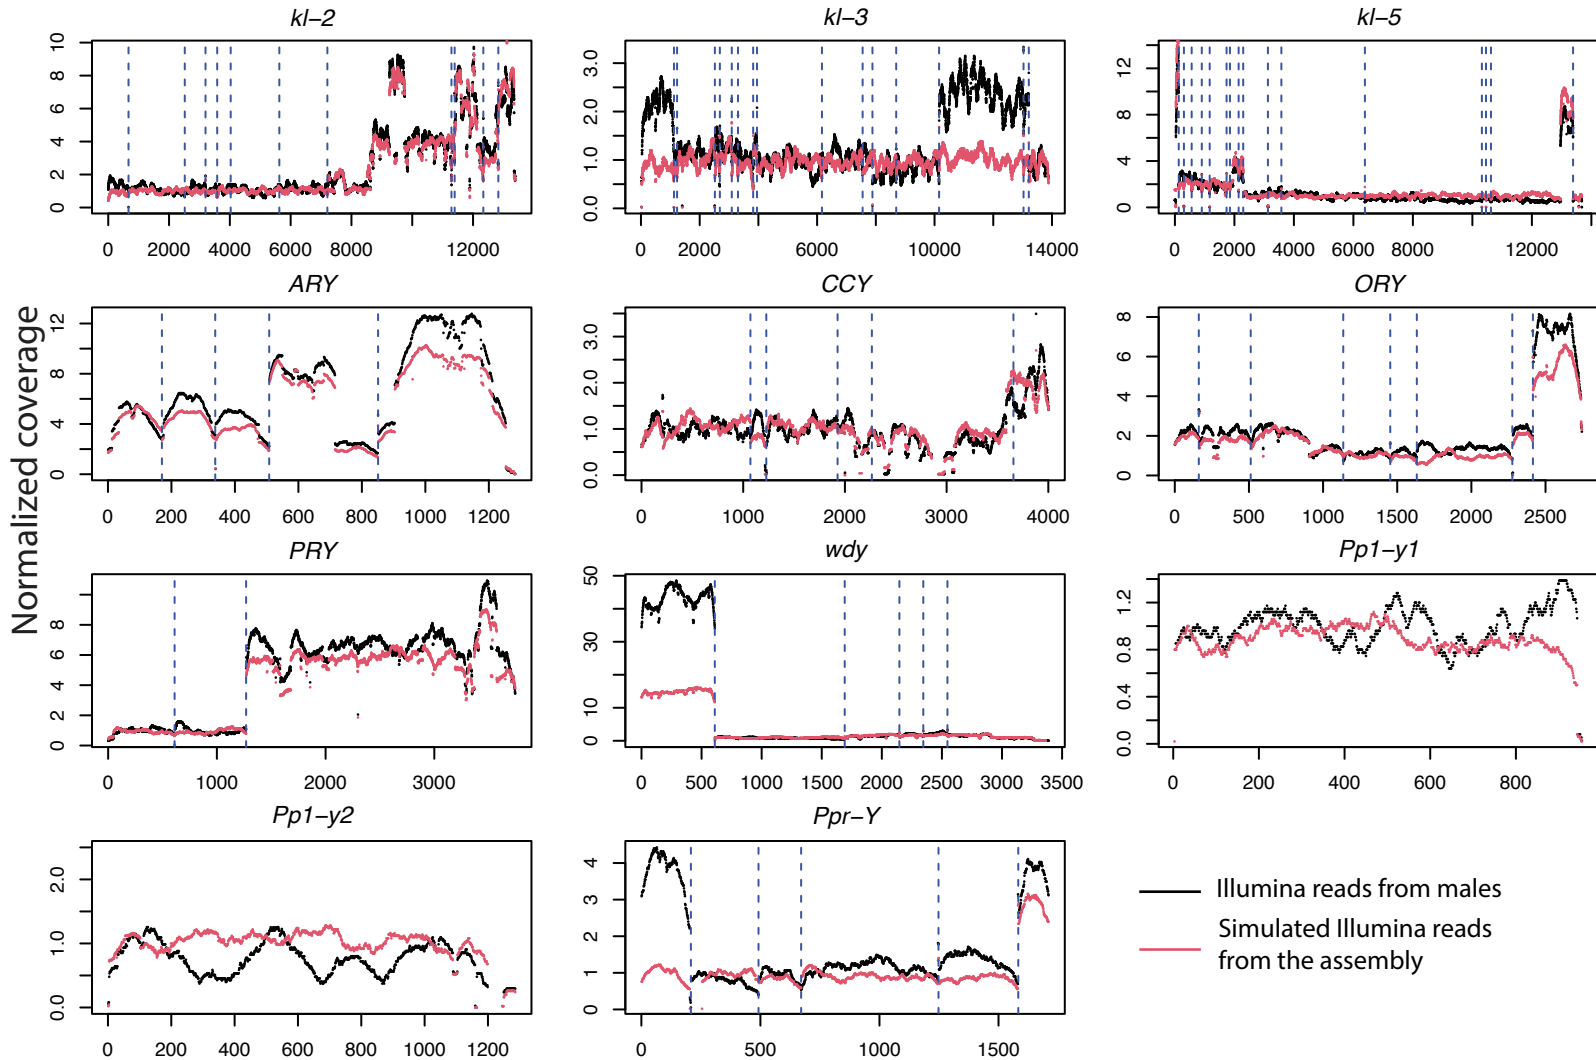

Supplement: supp [file elife-75795-supp-v1.zip]
