# Supplementary material for: Unique structure and positive selection promote the rapid divergence of Drosophila Y chromosomes
Source: eLife journal article supplement (doi:10.7554/elife.75795), 2022-01-06

Fold difference of TE abundance

Other chromosomes

Fold difference of TE abundance  
Y chromosome

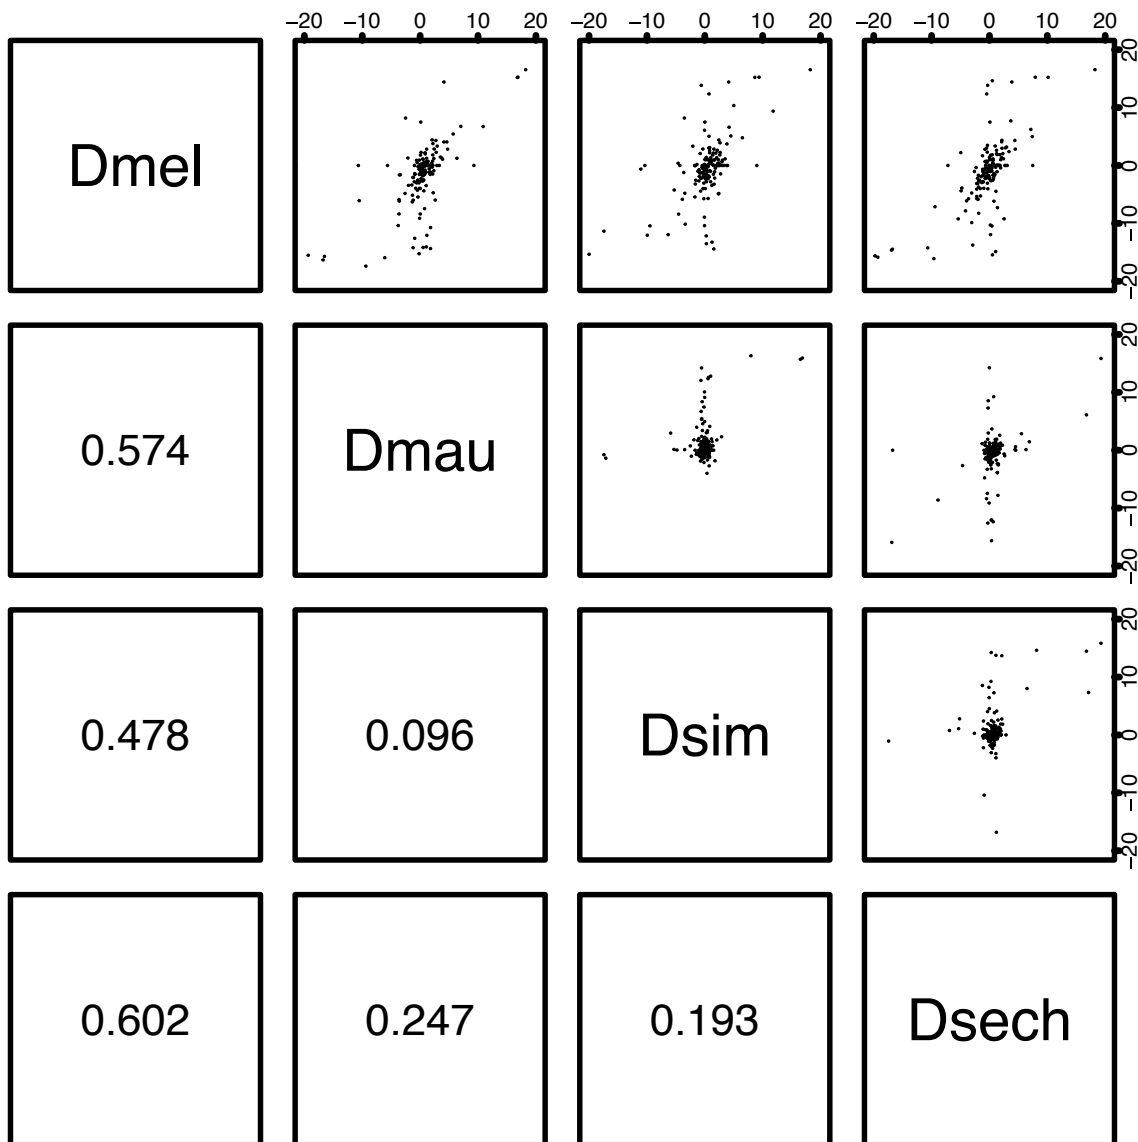

Supplement: supp [file elife-75795-supp-v1.zip]
