# Supplementary material for: Unique structure and positive selection promote the rapid divergence of Drosophila Y chromosomes
Source: eLife journal article supplement (doi:10.7554/elife.75795), 2022-01-06
Supplement: supp [file elife_poa_e75795_Supplementary_file_8.xlsx]

## Sheet: Sheet1
Supplementary file 8. Enriched GO terms in Y-linked duplicated genes in D. melanogaster and the D. simulans clade. We searched the enriched GO term from recently duplicated Y-linked genes from Table S6 using PANTHER (Released 20190711; [163]). We listed all GO terms significantly enriched in the duplication (FDR < 0.05).
	PANTHER Overrepresentation Test (Released 20210224)									Analysis Type:	PANTHER Overrepresentation Test (Released 20210224)
Annotation Version and Release Date:	GO Ontology database DOI: 10.5281/zenodo.5228828 Released 2021-08-18									Annotation Version and Release Date:	GO Ontology database DOI: 10.5281/zenodo.5228828 Released 2021-08-18
Analyzed List:	59 genes									Analyzed List:	59 genes
Reference List:	Drosophila melanogaster (all genes in database)									Reference List:	Drosophila melanogaster (all genes in database)
Test Type:	FISHER									Test Type:	FISHER
Correction:	FDR									Correction:	FDR
GO biological process complete	Drosophila melanogaster - REFLIST (13811)	total 59 genes	expected	over/under	fold Enrichment	raw P-value	FDR			GO cellular component complete	Drosophila melanogaster - REFLIST (13811)	total 59 genes	expected	over/under	fold Enrichment	raw P-value	FDR
central nervous system neuron development (GO:0021954)	7	2	0.03	+	66.88	0.000628	0.0429			RCAF complex (GO:0035059)	3	2	0.01	+	> 100	0.000176	0.0118
mating behavior, sex discrimination (GO:0048047)	8	2	0.03	+	58.52	0.000783	0.0488			nucleosome (GO:0000786)	17	5	0.07	+	68.85	2.92e-08	7.83e-06
central nervous system neuron differentiation (GO:0021953)	8	2	0.03	+	58.52	0.000783	0.0484			DNA packaging complex (GO:0044815)	23	5	0.1	+	50.89	1.07e-07	2.05e-05
regulation of protein localization to membrane (GO:1905475)	16	3	0.07	+	43.89	6.75e-05	0.00682			protein-DNA complex (GO:0032993)	48	5	0.21	+	24.38	2.88e-06	0.000322
positive regulation of cellular protein localization (GO:1903829)	27	4	0.12	+	34.68	8.53e-06	0.00133			nuclear membrane (GO:0031965)	41	3	0.18	+	17.13	0.000855	0.0459
nucleosome assembly (GO:0006334)	35	4	0.15	+	26.75	2.17e-05	0.00273			nuclear envelope (GO:0005635)	128	6	0.55	+	10.97	2.15e-05	0.0016
muscle system process (GO:0003012)	28	3	0.12	+	25.08	0.000302	0.0228			cytoplasmic ribonucleoprotein granule (GO:0036464)	95	4	0.41	+	9.86	0.000823	0.046
regulation of cellular protein localization (GO:1903827)	57	5	0.24	+	20.53	6.3e-06	0.00102			polytene chromosome (GO:0005700)	193	8	0.82	+	9.7	1.99e-06	0.000267
positive regulation of protein transport (GO:0051222)	35	3	0.15	+	20.06	0.000555	0.0386			chromatin (GO:0000785)	278	11	1.19	+	9.26	3.06e-08	6.85e-06
chromatin assembly (GO:0031497)	47	4	0.2	+	19.92	6.36e-05	0.0066			chromosome (GO:0005694)	574	16	2.45	+	6.53	1.88e-09	8.4e-07
positive regulation of establishment of protein localization (GO:1904951)	36	3	0.15	+	19.51	0.000599	0.0413			supramolecular complex (GO:0099080)	339	8	1.45	+	5.52	0.000103	0.00729
chromatin assembly or disassembly (GO:0006333)	50	4	0.21	+	18.73	7.97e-05	0.00775			envelope (GO:0031975)	451	8	1.93	+	4.15	0.000682	0.0416
positive regulation of endocytosis (GO:0045807)	39	3	0.17	+	18.01	0.000746	0.0468			organelle envelope (GO:0031967)	451	8	1.93	+	4.15	0.000682	0.0398
spindle assembly (GO:0051225)	69	5	0.29	+	16.96	1.51e-05	0.0021			intracellular non-membrane-bounded organelle (GO:0043232)	1574	27	6.72	+	4.02	4.69e-11	6.3e-08
nucleosome organization (GO:0034728)	72	5	0.31	+	16.26	1.83e-05	0.0025			non-membrane-bounded organelle (GO:0043228)	1574	27	6.72	+	4.02	4.69e-11	3.15e-08
nuclear export (GO:0051168)	79	5	0.34	+	14.82	2.8e-05	0.00335			cytoskeleton (GO:0005856)	545	9	2.33	+	3.87	0.000512	0.0327
protein-DNA complex assembly (GO:0065004)	70	4	0.3	+	13.38	0.000272	0.0212			nucleus (GO:0005634)	2763	28	11.8	+	2.37	2.13e-06	0.00026
DNA packaging (GO:0006323)	107	6	0.46	+	13.13	8.11e-06	0.00129			protein-containing complex (GO:0032991)	2708	27	11.57	+	2.33	7.42e-06	0.000711
chromatin remodeling (GO:0006338)	130	7	0.56	+	12.6	1.75e-06	0.000349			cytoplasm (GO:0005737)	4433	35	18.94	+	1.85	1.89e-05	0.00149
regulation of protein localization (GO:0032880)	103	5	0.44	+	11.36	9.35e-05	0.00887			intracellular organelle (GO:0043229)	5451	42	23.29	+	1.8	1.34e-06	0.000225
spindle organization (GO:0007051)	126	6	0.54	+	11.15	1.98e-05	0.00265			intracellular membrane-bounded organelle (GO:0043231)	4825	37	20.61	+	1.8	1.56e-05	0.00139
protein-DNA complex subunit organization (GO:0071824)	113	5	0.48	+	10.36	0.000142	0.0126			membrane-bounded organelle (GO:0043227)	5019	38	21.44	+	1.77	1.62e-05	0.00136
DNA conformation change (GO:0071103)	136	6	0.58	+	10.33	2.99e-05	0.00352			organelle (GO:0043226)	5549	42	23.71	+	1.77	1.77e-06	0.000264
nuclear transport (GO:0051169)	115	5	0.49	+	10.18	0.000154	0.0134			intracellular anatomical structure (GO:0005622)	6531	49	27.9	+	1.76	2.16e-08	7.25e-06
nucleocytoplasmic transport (GO:0006913)	115	5	0.49	+	10.18	0.000154	0.0133			cellular anatomical entity (GO:0110165)	9084	54	38.81	+	1.39	6.29e-06	0.000649
regulation of cellular localization (GO:0060341)	119	5	0.51	+	9.84	0.000179	0.0152
oocyte differentiation (GO:0009994)	149	6	0.64	+	9.43	4.89e-05	0.00543
oocyte development (GO:0048599)	126	5	0.54	+	9.29	0.000232	0.0188
cell maturation (GO:0048469)	156	6	0.67	+	9	6.25e-05	0.00657
anatomical structure maturation (GO:0071695)	158	6	0.67	+	8.89	6.69e-05	0.00685
meiotic nuclear division (GO:0140013)	160	6	0.68	+	8.78	7.16e-05	0.00705
meiotic cell cycle process (GO:1903046)	200	7	0.85	+	8.19	2.63e-05	0.0032
developmental maturation (GO:0021700)	173	6	0.74	+	8.12	0.000109	0.0102
chromatin organization (GO:0006325)	351	12	1.5	+	8	3.19e-08	9.54e-06
nuclear division (GO:0000280)	238	8	1.02	+	7.87	8.88e-06	0.00135
male gamete generation (GO:0048232)	300	10	1.28	+	7.8	6.41e-07	0.000147
positive regulation of transport (GO:0051050)	151	5	0.65	+	7.75	0.000518	0.037
meiotic cell cycle (GO:0051321)	212	7	0.91	+	7.73	3.78e-05	0.00439
RNA localization (GO:0006403)	152	5	0.65	+	7.7	0.000533	0.0377
microtubule cytoskeleton organization (GO:0000226)	342	11	1.46	+	7.53	2.33e-07	5.66e-05
organelle fission (GO:0048285)	251	8	1.07	+	7.46	1.29e-05	0.00186
spermatogenesis (GO:0007283)	254	8	1.09	+	7.37	1.4e-05	0.00199
learning or memory (GO:0007611)	160	5	0.68	+	7.32	0.000668	0.0448
regulation of cell development (GO:0060284)	161	5	0.69	+	7.27	0.000687	0.0457
cognition (GO:0050890)	161	5	0.69	+	7.27	0.000687	0.0453
regulation of translation (GO:0006417)	162	5	0.69	+	7.22	0.000706	0.045
muscle structure development (GO:0061061)	197	6	0.84	+	7.13	0.000216	0.0179
positive regulation of multicellular organismal process (GO:0051240)	197	6	0.84	+	7.13	0.000216	0.0177
positive regulation of cellular component organization (GO:0051130)	302	9	1.29	+	6.98	5.99e-06	0.00101
supramolecular fiber organization (GO:0097435)	203	6	0.87	+	6.92	0.000252	0.0198
regulation of cell differentiation (GO:0045595)	273	8	1.17	+	6.86	2.33e-05	0.00287
non-membrane-bounded organelle assembly (GO:0140694)	206	6	0.88	+	6.82	0.000273	0.021
chromosome organization (GO:0051276)	555	15	2.37	+	6.33	1e-08	3.71e-06
positive regulation of developmental process (GO:0051094)	227	6	0.97	+	6.19	0.000451	0.0331
regulation of developmental growth (GO:0048638)	231	6	0.99	+	6.08	0.000494	0.0359
protein-containing complex assembly (GO:0065003)	435	11	1.86	+	5.92	2.33e-06	0.000443
regulation of multicellular organismal process (GO:0051239)	566	14	2.42	+	5.79	9.98e-08	2.51e-05
cellular protein-containing complex assembly (GO:0034622)	409	10	1.75	+	5.72	9.5e-06	0.00142
microtubule-based process (GO:0007017)	460	11	1.97	+	5.6	3.95e-06	0.000715
cell cycle process (GO:0022402)	503	12	2.15	+	5.58	1.38e-06	0.000289
germ cell development (GO:0007281)	686	16	2.93	+	5.46	2.23e-08	7.23e-06
cellular process involved in reproduction in multicellular organism (GO:0022412)	822	19	3.51	+	5.41	8.46e-10	4.39e-07
protein-containing complex subunit organization (GO:0043933)	528	12	2.26	+	5.32	2.26e-06	0.000439
organelle assembly (GO:0070925)	397	9	1.7	+	5.31	4.96e-05	0.00544
cytoskeleton organization (GO:0007010)	574	13	2.45	+	5.3	8.24e-07	0.000183
gamete generation (GO:0007276)	885	20	3.78	+	5.29	3.89e-10	2.75e-07
positive regulation of signal transduction (GO:0009967)	402	9	1.72	+	5.24	5.45e-05	0.00581
multicellular organismal reproductive process (GO:0048609)	1006	22	4.3	+	5.12	6.98e-11	1.36e-07
cell cycle (GO:0007049)	599	13	2.56	+	5.08	1.32e-06	0.000285
multi-organism reproductive process (GO:0044703)	1015	22	4.34	+	5.07	8.27e-11	1.29e-07
sexual reproduction (GO:0019953)	1015	22	4.34	+	5.07	8.27e-11	1.07e-07
multi-organism process (GO:0051704)	1016	22	4.34	+	5.07	8.43e-11	9.37e-08
female gamete generation (GO:0007292)	604	13	2.58	+	5.04	1.44e-06	0.000295
developmental process involved in reproduction (GO:0003006)	863	18	3.69	+	4.88	1.29e-08	4.58e-06
regulation of cellular protein metabolic process (GO:0032268)	486	10	2.08	+	4.82	4.06e-05	0.00458
positive regulation of cell communication (GO:0010647)	441	9	1.88	+	4.78	0.000109	0.0101
positive regulation of signaling (GO:0023056)	441	9	1.88	+	4.78	0.000109	0.01
regulation of cellular component organization (GO:0051128)	740	15	3.16	+	4.74	4.01e-07	9.46e-05
positive regulation of response to stimulus (GO:0048584)	501	10	2.14	+	4.67	5.22e-05	0.00564
regulation of developmental process (GO:0050793)	653	13	2.79	+	4.66	3.36e-06	0.000623
oogenesis (GO:0048477)	553	11	2.36	+	4.66	2.16e-05	0.00276
cellular component assembly (GO:0022607)	1029	20	4.4	+	4.55	5.09e-09	2.09e-06
regulation of protein metabolic process (GO:0051246)	517	10	2.21	+	4.53	6.76e-05	0.00674
reproductive process (GO:0022414)	1150	22	4.91	+	4.48	8.65e-10	4.21e-07
cell development (GO:0048468)	1248	23	5.33	+	4.31	6.28e-10	3.76e-07
multicellular organism reproduction (GO:0032504)	1234	22	5.27	+	4.17	3.19e-09	1.46e-06
regulation of localization (GO:0032879)	517	9	2.21	+	4.07	0.000351	0.0262
neuron development (GO:0048666)	527	9	2.25	+	4	0.000403	0.0298
regulation of cell communication (GO:0010646)	892	15	3.81	+	3.94	4e-06	0.000708
regulation of signaling (GO:0023051)	892	15	3.81	+	3.94	4e-06	0.000693
cell differentiation (GO:0030154)	1554	26	6.64	+	3.92	2.25e-10	2.19e-07
generation of neurons (GO:0048699)	778	13	3.32	+	3.91	2.15e-05	0.00279
cellular component biogenesis (GO:0044085)	1200	20	5.13	+	3.9	6.54e-08	1.7e-05
cellular developmental process (GO:0048869)	1568	26	6.7	+	3.88	2.74e-10	2.13e-07
organelle organization (GO:0006996)	1761	29	7.52	+	3.85	1.55e-11	4.03e-08
reproduction (GO:0000003)	1375	22	5.87	+	3.75	2.28e-08	7.09e-06
neurogenesis (GO:0022008)	824	13	3.52	+	3.69	3.89e-05	0.00445
regulation of signal transduction (GO:0009966)	762	12	3.26	+	3.69	8.28e-05	0.00795
regulation of response to stimulus (GO:0048583)	962	15	4.11	+	3.65	9.89e-06	0.00145
cellular macromolecule localization (GO:0070727)	579	9	2.47	+	3.64	0.000785	0.0481
neuron differentiation (GO:0030182)	671	10	2.87	+	3.49	0.00054	0.0378
positive regulation of cellular process (GO:0048522)	1587	23	6.78	+	3.39	5.95e-08	1.6e-05
positive regulation of biological process (GO:0048518)	1717	24	7.33	+	3.27	5.29e-08	1.52e-05
macromolecule localization (GO:0033036)	876	12	3.74	+	3.21	0.0003	0.0229
cellular component organization (GO:0016043)	2640	36	11.28	+	3.19	2e-12	1.56e-08
nervous system development (GO:0007399)	989	13	4.22	+	3.08	0.000241	0.0193
cellular component organization or biogenesis (GO:0071840)	2795	36	11.94	+	3.02	1.13e-11	4.4e-08
cellular response to stimulus (GO:0051716)	1441	18	6.16	+	2.92	2.14e-05	0.00282
signal transduction (GO:0007165)	965	12	4.12	+	2.91	0.000712	0.045
developmental process (GO:0032502)	2704	33	11.55	+	2.86	7.98e-10	4.44e-07
anatomical structure development (GO:0048856)	2577	31	11.01	+	2.82	5.86e-09	2.28e-06
regulation of biological quality (GO:0065008)	1256	15	5.37	+	2.8	0.000207	0.0173
negative regulation of biological process (GO:0048519)	1429	16	6.1	+	2.62	0.000252	0.02
negative regulation of cellular process (GO:0048523)	1256	14	5.37	+	2.61	0.000706	0.0454
multicellular organism development (GO:0007275)	2226	24	9.51	+	2.52	6.27e-06	0.00104
regulation of cellular process (GO:0050794)	3662	39	15.64	+	2.49	2.61e-10	2.26e-07
multicellular organismal process (GO:0032501)	3422	36	14.62	+	2.46	4.35e-09	1.88e-06
regulation of cellular metabolic process (GO:0031323)	1953	20	8.34	+	2.4	0.000111	0.0101
regulation of biological process (GO:0050789)	3924	40	16.76	+	2.39	4.54e-10	2.95e-07
regulation of primary metabolic process (GO:0080090)	1825	18	7.8	+	2.31	0.000663	0.0449
regulation of metabolic process (GO:0019222)	2138	21	9.13	+	2.3	0.000172	0.0147
regulation of macromolecule metabolic process (GO:0060255)	1978	19	8.45	+	2.25	0.000509	0.0367
response to stimulus (GO:0050896)	2468	23	10.54	+	2.18	0.000124	0.0111
biological regulation (GO:0065007)	4362	40	18.63	+	2.15	1.79e-08	6.05e-06
cellular process (GO:0009987)	7284	51	31.12	+	1.64	5.92e-08	1.65e-05
biological_process (GO:0008150)	11153	57	47.65	+	1.2	0.000702	0.0459
Unclassified (UNCLASSIFIED)	2658	2	11.35	-	0.18	0.000702	0.0455
