# Supplementary material for: Unique structure and positive selection promote the rapid divergence of Drosophila Y chromosomes
Source: eLife. 2022 Jan 6;11:e75795. doi: 10.7554/eLife.75795 (PMC8794474; doi:10.7554/eLife.75795)
Supplement: Supplementary file 1. — We listed the copy number of each exon in conserved Y-linked genes based on BLAST results. [file elife-75795-supp1.xlsx]

## Sheet: Sheet1
Supplementary file 1. The copy number of exons in conserved Y-linked genes. We listed the copy number of each exon in conserved Y-linked genes based on BLAST results.
		# of copies	This study/Chakraborty et al. 2021
Gene	exon #	mel	mau	sim	sec
kl-2	1	1	1/1	1/1	1/1
	2	1	4/4	1/1	1/0
	3	1	1/1	1/1	1/1
	4	1	1/1	1/1	1/1
	5	1	2/2	1/1	1/1
	6	1	1/1	1/1	1/1
	7	1	1/1	1/1	1/1
	8	1	9/8	8/5	9/3
	9	1	4/4	7/7	4/3
	10	1	11/12	12/7	9/10
	11	1	5/5	3/3	3/2
	12	1	6/6	4/4	8/7
kl-3	1	2	3/1	1/0	1/2
	2	1	1/1	1/1	1/2
	3	1	1/1	1/1	1/2
	4	1	1/1	1/1	1/1
	5	1	1/1	1/1	1/1
	6	1	1/1	1/0	1/0
	7	1	1/1	1/0	1/0
	8	1	1/0	1/0	1/0
	9	1	1/0	1/0	1/0
	10	1	1/0	1/0	1/0
	11	1	1/0	1/0	1/1
	12	1	1/0	1/0	1/0
	13	1	1/0	1/0	1/0
	14	1	1/0	2/1	1/1
	15	1	1/0	1/1	1/1
	16	1	1/1	3/3	1/1
kl-5	1	1	2/3	1/0	1/1
	2	1	1/1	1/1	10/0
	3	1	1/1	1/1	1/0
	4	1	1/1	1/1	1/0
	5	1	1/1	1/1	1/1
	6	1	1/0	1/0	1/0
	7	1	1/0	1/0	1/0
	8	1	1/0	1/0	1/0
	9	1	2/2	2/2	4/2
	10	1	2/2	2/2	4/2
	11	1	1/1	1/1	2/1
	12	1	1/1	1/1	2/1
	13	1	1/1	1/1	2/1
	14	1	1/1	1/1	2/1
	15	1	1/1	1/1	2/1
	16	1	1/1	1/1	2/1
	17	1	4/4	6/4	15/9
PRY	1	1	5/8	5/1	10/4
	2	1	1/0	1/0	1/1
	3	1	2/4	1/0	1/0
ORY	1	2	2/2	3/0	2/2
	2	2	2/0	3/0	2/2
	3	1	2/2	2/2	2/2
	4	1	1/1	1/1	1/1
	5	1	1/1	1/1	1/1
	6	1	1/1	1/1	1/1
	7	1	1/1	1/1	2/2
	8	1	11/9	2/2	6/7
Pp1-Y1	1	1	2/2	1/1	1/1
Pp1-Y2	1	1	2/2	2/0	1/1
CCY	1	1	1/1	1/1	1/1
	2	1	1/1	1/1	1/0
	3	1	2/1	1/0	1/1
	4	1	2/1	1/0	1/1
	5	2	2/1	1/0	1/2
	6	1	2/1	1/0	2/2
Ppr-Y	1	1	2/1	1/0	1/0
	2	1	1/1	1/1	1/1
	3	1	1/1	1/1	1/0
	4	2	1/1	1/1	1/1
	5	1	1/1	1/1	1/1
	6	5	1/1	1/0	3/1
ARY	1	1	1/1	4/4	5/3
	2	1	1/1	4/4	5/3
	3	1	1/1	4/4	5/3
	4	1	1/1	4/4	4/3
	5	1	1/1	4/4	9/5
	6	1	1/1	4/4	10/5
wdy	1	4	1/1	3/3	15/21
	2	2	1/0	1/1	1./1
	3	1	2/0	2/2	2/3
	4	1	2/0	2/2	2/3
	5	2	1/1	1/1	2/2
	6	2	2/2	1/1	2/2
* The missing introns in the previous assembly are shown in red
