# Supplementary material for: Unique structure and positive selection promote the rapid divergence of Drosophila Y chromosomes
Source: eLife. 2022 Jan 6;11:e75795. doi: 10.7554/eLife.75795 (PMC8794474; doi:10.7554/eLife.75795)
Supplement: Supplementary file 2. — We calculated the median female-over-male coverage in our Illumina data in every 10 kb region with known chromosomal location. We then estimated the sensitivity and specificity of our methods using these data. [file elife-75795-supp2.xlsx]

## Sheet: Sheet1
Supplementary file 2. The estimates of sensitivity and specificity of our Y-linked sequence assignment methods using 10-kb regions with known chromosomal location. We calculated the median female-over-male coverage in our Illumina data in every 10-kb region with known chromosomal location. We then estimated the sensitivity and specificity of our methods using these data.
Criteria
Dmau	Total regions	Regions from Y	Regions not from Y	Sensitivity	False discovery rate
Whole genome	13892	1409	12483
Female/Male Median = 0	1606	1401	205	0.994322	0.127646
with Female/Male Average < 0.1	1435	1355	80	0.961675	0.0498132
Dsim	Total regions	Regions from Y	Regions not from Y	Sensitivity	False discovery
Whole genome	13523	1078	12445
Female/Male Median = 0	1056	1056	0	0.979592	0
Dsech	Total regions	Regions from Y	Regions not from Y	Sensitivity	False discovery
Whole genome	13906	1153	12753
Female/Male Median = 0	1180	1148	32	0.99308	0.0271186
