# Supplementary material for: Unique structure and positive selection promote the rapid divergence of Drosophila Y chromosomes
Source: eLife. 2022 Jan 6;11:e75795. doi: 10.7554/eLife.75795 (PMC8794474; doi:10.7554/eLife.75795)
Supplement: Supplementary file 3. [file elife-75795-supp3.xlsx]

## Sheet: Sheet1
Supplementary file 3. Probe and primer information.
Oligo probes	Sequences	Length	Label
Cy3-AATAT*6	/5Cy3/AATATAATATAATATAATATAATATAATAT	30	Cy3
FAM-AAGAT*6	/56-FAM/AAGATAAGATAAGATAAGATAAGATAAGAT	30	FAM
IGS240_sim	/56-FAM/TGGTTGCCGACCTCTCATATTGTTCAAAACTTATGTATTCATATGA	46	FAM
FAM-AAAATG*5	/56-FAM/AAAATGAAAATGAAAATGAAAATGAAAATG	30	FAM
FAM-ATAGTACAG*4	/56-FAM/ATAGTACAGATAGTACAGATAGTACAGATAGTACAG	36	FAM
FAM-AAACAT*5	/56-FAM/AAACATAAACATAAACATAAACATAAACAT	30	FAM
FAM-AAATGT*5	/56-FAM/AAATGTAAATGTAAATGTAAATGTAAATGT	30	FAM
FAM_ATCTC*5	/56-FAM/ATCTCATCTCATCTCATCTCATCTCATCTC	30	FAM
FAM_AATAG*5	/56-FAM/AATAGAATAGAATAGAATAGAATAGAATAG	30	FAM
FAM_AATTAAC*5	/56-FAM/AA TTA ACA ATT AAC AAT TAA CAA TTA ACA ATT AAC	35	FAM
PCR probe
SRPK	F:GGTCAGTCGTGAGGTGACAG	958	DIG,Biotin
	R::GCAGGAACGGGTAAACGACT
PCKR	F:GAACTGGCAACATGTCGAGC	692	DIG,Biotin
	R:CTCGGGCGATTCGAGCTTTA
PCR primers for new Y-linked duplication
CG16781.Y_F	GAGCCTTCTTTCTGCCGACT	471
CG16781.Y_R	GATGACACATGCTCGTTGCC
CG12206.Y_F	TACGACAGCTGTTGAGACCG	369
CG12206.Y_R	TCCGTTCCTTTTCGTTTCGC
wde.Y_F	GACAACTCCGACAATGCGTG	242
wde.Y_R	TGGCTCCGCTTGGTTACATT
tbrd-2.Y_F	CATTTCGGAAAGGCGGGTTG	852
tbrd-2.Y_R	ACGTTGACCTGCCTCCATTT
CG5645.Y_F	TGTTATTGTAACACGTGTGGAGT	155
CG5645.Y_R	TTGCGCAGGATGTTGTAGGT
