# Supplementary material for: Unique structure and positive selection promote the rapid divergence of Drosophila Y chromosomes
Source: eLife. 2022 Jan 6;11:e75795. doi: 10.7554/eLife.75795 (PMC8794474; doi:10.7554/eLife.75795)
Supplement: Supplementary file 4. — We listed the genomic location of each exon in conserved Y-linked genes in our assemblies based on BLAST results. [file elife-75795-supp4.xlsx]

## Sheet: Sheet1
Supplementary file 4. The genomic location of duplicated exons in conserved Y-linked genes. We listed the genomic location of each exon in conserved Y-linked genes in our assemblies based on BLAST results.
Species	Gene:Exon	Contig/Scaffold	Exon_start	Exon_end	Target_start	Target_end	number of fragments in the alignment	RNA-seq_testes_coverage_Replicate_1	RNA-seq_testes_coverage_Replicate_2	RNA-seq_testes_coverage_Replicate_3	sum of coverage from unique mapped reads (mapQ>1)	average depth from unique mapped reads (mapQ>1)
mau	ARY:1	Y_scaffold3	1	170	3544221	3544390	1	100736	53592	70293	224621	1321.3
mau	ARY:2	Y_scaffold3	1	224	3544221	3544444	1	146074	77793	101578	325445	1452.88
mau	ARY:3	Y_scaffold3	1	168	3544505	3544672	1	154508	78072	97388	329968	1964.1
mau	ARY:4	Y_scaffold3	2	170	3544724	3544892	1	152148	70514	97478	320140	1894.32
mau	ARY:5	Y_scaffold3	1	343	3544952	3545294	1	378608	195352	185709	759669	2214.78
mau	ARY:6	Y_scaffold3	1	432	3545352	3545769	1	240958	129118	97971	468047	1119.73
mau	CCY:1	Y_scaffold1	1	1071	3415638	3416747	1	156824	85281	95315	337420	303.982
mau	CCY:2	Y_scaffold1	1	156	3967697	3967852	1	13504	7119	10713	31336	200.872
mau	CCY:3	Y_scaffold1	3	701	4674664	4675362	1	17904	18630	27011	63545	90.9084
mau	CCY:3	Y_scaffold1	3	701	4774899	4775598	1	0	246	1661	1907	2.72429
mau	CCY:4	Y_scaffold1	1	336	4775599	4775958	1	1455	748	2141	4344	12.0667
mau	CCY:4	Y_scaffold1	1	337	4675363	4675723	1	13786	14348	16204	44338	122.82
mau	CCY:5	Y_scaffold1	1	1392	4675724	4676971	2	69574	63280	83937	216791	173.711
mau	CCY:5	Y_scaffold1	1	1392	4775960	4777206	2	11261	7435	13893	32589	26.1339
mau	CCY:6	Y_scaffold1	1	226	4777207	4777432	1	1896	1764	3660	7320	32.3894
mau	CCY:6	Y_scaffold1	1	345	4676972	4677370	1	30227	21374	21224	72825	182.519
mau	kl-2:1	Y_scaffold1	1	665	1911025	1911689	1	24354	16001	16754	57109	85.8782
mau	kl-2:10	Y_scaffold1	743	899	2844270	2844426	1	2652	312	1560	4524	28.8153
mau	kl-2:10	Y_scaffold1	354	606	2801925	2802099	4	2460	348	1056	3864	22.08
mau	kl-2:10	Y_scaffold1	354	651	2816126	2816345	3	5796	3066	3066	11928	54.2182
mau	kl-2:10	Y_scaffold1	1	834	2901269	2902072	2	0	0	0	0	0
mau	kl-2:10	Y_scaffold1	1	899	2847192	2848081	1	15113	1778	8890	25781	28.9674
mau	kl-2:10	Y_scaffold1	1	899	2857175	2858044	1	3375	1244	1371	5990	6.88506
mau	kl-2:10	Y_scaffold1	1	899	2889837	2890701	2	0	0	0	0	0
mau	kl-2:10	Y_scaffold1	1	899	2893632	2894516	1	0	0	0	0	0
mau	kl-2:10	Y_scaffold1	1	899	2897448	2898337	1	0	0	0	0	0
mau	kl-2:10	Y_scaffold1	1	943	2798350	2799292	1	30458	17809	24310	72577	76.9639
mau	kl-2:10	Y_scaffold1	1	943	2812951	2813893	1	20351	14186	12042	46579	49.3945
mau	kl-2:11	Y_scaffold1	8	152	2813957	2814101	1	2742	2016	1728	6486	44.731
mau	kl-2:11	Y_scaffold1	1	494	2799353	2799846	1	28121	24549	17003	69673	141.038
mau	kl-2:11	Y_scaffold1	1	494	2832062	2832554	1	8364	984	2952	12300	24.9493
mau	kl-2:11	Y_scaffold1	1	494	2851535	2852031	1	8444	992	5162	14598	29.3722
mau	kl-2:11	Y_scaffold1	1	494	2861808	2862308	1	0	0	0	0	0
mau	kl-2:12	Y_scaffold1	20	554	2888872	2888337	1	0	0	0	0	0
mau	kl-2:12	Y_scaffold1	3	554	2799911	2800462	1	63541	28085	40838	132464	239.971
mau	kl-2:12	Y_scaffold1	3	554	2814155	2814706	1	22941	11913	14259	49113	88.9728
mau	kl-2:12	Y_scaffold1	3	554	2852105	2852657	1	8530	1593	5020	15143	27.3834
mau	kl-2:12	Y_scaffold1	1	554	2832608	2833161	1	9625	1106	3569	14300	25.8123
mau	kl-2:12	Y_scaffold1	1	554	2862362	2862915	1	212	0	748	960	1.73285
mau	kl-2:2	Y_scaffold1	551	1850	2336229	2336908	2	0	0	0	0	0
mau	kl-2:2	Y_scaffold1	551	1850	2339081	2339760	2	0	0	0	0	0
mau	kl-2:2	Y_scaffold1	551	1850	2558674	2559353	2	0	241	0	241	0.354412
mau	kl-2:2	Y_scaffold1	1	1850	2332207	2334056	1	2006	499	1997	4502	2.43351
mau	kl-2:3	Y_scaffold1	1	682	2354941	2355622	1	1661	2004	1498	5163	7.57038
mau	kl-2:4	Y_scaffold1	1	385	2355677	2356061	1	2576	1610	2094	6280	16.3117
mau	kl-2:5	Y_scaffold1	1	119	2356928	2357046	1	0	472	0	472	3.96639
mau	kl-2:5	Y_scaffold1	1	444	2357876	2358319	1	676	1200	1219	3095	6.97072
mau	kl-2:6	Y_scaffold1	1	1600	2790803	2792402	1	12540	6481	2940	21961	13.7256
mau	kl-2:7	Y_scaffold1	1	1580	2792403	2793982	1	19773	10249	5626	35648	22.562
mau	kl-2:8	Y_scaffold1	3210	3604	2808393	2808787	1	5875	2266	5332	13473	34.1089
mau	kl-2:8	Y_scaffold1	1312	2042	2869422	2870107	1	0	0	0	0	0
mau	kl-2:8	Y_scaffold1	3334	4082	2888869	2889620	1	0	0	0	0	0
mau	kl-2:8	Y_scaffold1	1939	2782	2886523	2875988	2	251	0	900	1151	0.109244
mau	kl-2:8	Y_scaffold1	2367	4082	2855240	2856954	1	695	249	4130	5074	2.9586
mau	kl-2:8	Y_scaffold1	2288	4082	2810929	2812730	1	34299	19469	17234	71002	39.4018
mau	kl-2:8	Y_scaffold1	1939	3936	2835007	2844276	2	158009	18538	59464	236011	25.4597
mau	kl-2:8	Y_scaffold1	1312	3330	2816378	2818314	1	47791	26857	26803	101451	52.3753
mau	kl-2:8	Y_scaffold1	1	4082	2794048	2798129	1	15278	28443	32894	76615	18.769
mau	kl-2:9	Y_scaffold1	1	105	2798192	2798296	1	2277	2455	2507	7239	68.9429
mau	kl-2:9	Y_scaffold1	1	105	2812793	2812897	1	2403	1954	1382	5739	54.6571
mau	kl-2:9	Y_scaffold1	1	105	2857017	2857121	1	0	0	0	0	0
mau	kl-2:9	Y_scaffold1	1	105	2889683	2889782	1	0	0	0	0	0
mau	kl-3:1	Y_scaffold1	1	1126	5897029	5898155	1	4710	3465	5737	13912	12.3443
mau	kl-3:1	Y_scaffold1	1	1126	5903959	5905083	1	0	0	984	984	0.874667
mau	kl-3:1	Y_scaffold1	1	1126	5910509	5911634	1	7758	7824	9773	25355	22.5178
mau	kl-3:10	Y_scaffold1	1	1383	6205573	6206955	1	2445	4336	8627	15408	11.141
mau	kl-3:11	Y_scaffold1	1	335	6270719	6271053	1	3018	2574	2815	8407	25.0955
mau	kl-3:12	Y_scaffold1	2	809	6298913	6299720	1	6547	4618	14242	25407	31.4443
mau	kl-3:13	Y_scaffold1	1	1461	6299994	6301454	1	6440	13440	16398	36278	24.8309
mau	kl-3:14	Y_scaffold1	1	2876	6343117	6345992	1	112274	108613	128836	349723	121.6
mau	kl-3:15	Y_scaffold1	1	179	6346048	6346226	1	17358	17140	22678	57176	319.419
mau	kl-3:16	Y_scaffold1	1	672	6486977	6487648	1	101001	59656	68835	229492	341.506
mau	kl-3:2	Y_scaffold1	1	104	5913233	5913336	1	1054	987	1147	3188	30.6538
mau	kl-3:3	Y_scaffold1	1	1288	5913394	5914735	1	10546	9835	16027	36408	27.1297
mau	kl-3:4	Y_scaffold1	1	169	5970309	5970477	1	1619	2149	688	4456	26.3669
mau	kl-3:5	Y_scaffold1	1	406	5970542	5970947	1	5479	3084	4191	12754	31.4138
mau	kl-3:6	Y_scaffold1	1	212	6178731	6178942	1	1156	196	1264	2616	12.3396
mau	kl-3:7	Y_scaffold1	1	517	6178995	6179511	1	4250	2091	3236	9577	18.5242
mau	kl-3:8	Y_scaffold1	1	130	6203120	6203249	1	135	510	432	1077	8.28462
mau	kl-3:9	Y_scaffold1	1	2213	6203303	6205515	1	1867	3881	6515	12263	5.54135
mau	kl-5:1	Y_scaffold2	192	293	1424948	1425049	1	16192	8279	14264	38735	379.755
mau	kl-5:1	Y_scaffold2	1	163	1368577	1368739	1	11812	8212	10032	30056	184.393
mau	kl-5:1	Y_scaffold2	1	196	1408329	1408524	1	36228	20209	31685	88122	449.602
mau	kl-5:10	Y_scaffold2	102	292	932596	932815	1	2628	876	1551	5055	22.9773
mau	kl-5:10	Y_scaffold2	1	292	931375	931666	1	2583	3182	4486	10251	35.1062
mau	kl-5:11	Y_scaffold2	1	113	931211	931323	1	917	945	2482	4344	38.4425
mau	kl-5:12	Y_scaffold2	5	568	930590	931153	1	5689	4497	8923	19109	33.8812
mau	kl-5:13	Y_scaffold2	1	266	930267	930532	1	3951	1770	3597	9318	35.0301
mau	kl-5:14	Y_scaffold2	1	340	929874	930213	1	14799	8261	10099	33159	97.5265
mau	kl-5:15	Y_scaffold2	1	260	929557	929816	1	12246	5840	9892	27978	107.608
mau	kl-5:16	Y_scaffold2	1	174	929328	929501	1	5440	3482	3923	12845	73.8218
mau	kl-5:17	Y_scaffold2	33	129	822760	822856	1	892	1204	1106	3202	33.0103
mau	kl-5:17	Y_scaffold2	33	129	867216	867312	1	1280	1024	1221	3525	36.3402
mau	kl-5:17	Y_scaffold2	33	129	883217	883313	1	2420	1202	1252	4874	50.2474
mau	kl-5:17	Y_scaffold2	33	129	897017	897113	1	2466	1822	1715	6003	61.8866
mau	kl-5:2	Y_scaffold2	1	2760	1212743	1215505	1	135943	139793	241633	517369	187.249
mau	kl-5:3	Y_scaffold2	1	167	1212524	1212690	1	2491	3935	8588	15014	89.9042
mau	kl-5:4	Y_scaffold2	1	139	1212327	1212465	1	2318	3352	4308	9978	71.7842
mau	kl-5:5	Y_scaffold2	1	1673	981781	983453	1	22736	17962	29080	69778	41.7083
mau	kl-5:5	Y_scaffold2	1674	3930	1189708	1192026	2	21948	33301	51179	106428	45.8939
mau	kl-5:6	Y_scaffold2	1	2808	943247	946054	1	81894	62243	100219	244356	87.0214
mau	kl-5:7	Y_scaffold2	1	452	942749	943200	1	3539	4632	7432	15603	34.5199
mau	kl-5:8	Y_scaffold2	1	831	941861	942691	1	7696	7367	18479	33542	40.3634
mau	kl-5:9	Y_scaffold2	1	154	931725	931878	1	1280	849	2901	5030	32.6623
mau	kl-5:9	Y_scaffold2	1	154	932874	933027	1	1836	612	1136	3584	23.2727
mau	ORY:1	Y_scaffold1	1	162	141757	141917	1	1869	2191	1727	5787	35.9441
mau	ORY:1	Y_scaffold1	1	162	169320	169481	1	14164	5105	9703	28972	178.84
mau	ORY:2	Y_scaffold1	1	350	141986	142305	1	7064	1770	2367	11201	35.0031
mau	ORY:2	Y_scaffold1	1	350	169550	169899	1	31590	20348	23901	75839	216.683
mau	ORY:3	Y_scaffold1	1	393	480815	481206	1	12944	7490	7553	27987	71.3954
mau	ORY:3	Y_scaffold1	1	624	510569	511192	1	39429	30050	28522	98001	157.053
mau	ORY:4	Y_scaffold1	1	317	511246	511562	1	34434	22471	26041	82946	261.659
mau	ORY:5	Y_scaffold1	1	179	694018	694196	1	31183	21162	18755	71100	397.207
mau	ORY:6	Y_scaffold1	1	644	694480	695123	1	130870	62794	72521	266185	413.331
mau	ORY:7	Y_scaffold1	1	139	695188	695326	1	44047	19893	18713	82653	594.626
mau	ORY:8	Y_scaffold1	49	224	1519424	1519604	1	0	0	0	0	0
mau	ORY:8	Y_scaffold1	47	224	1420527	1420717	1	1747	760	1761	4268	22.3455
mau	ORY:8	Y_scaffold1	47	224	1478105	1478295	1	0	0	0	0	0
mau	ORY:8	Y_scaffold1	47	323	1437058	1437332	1	447	1696	92	2235	8.12727
mau	ORY:8	Y_scaffold1	1	330	1040382	1040711	1	56333	36825	20496	113654	344.406
mau	ORY:8	Y_scaffold1	1	330	1138288	1138614	1	3064	1304	1786	6154	18.8196
mau	ORY:8	Y_scaffold1	1	330	1142898	1143224	1	3120	1553	1630	6303	19.2752
mau	ORY:8	Y_scaffold1	1	330	1147342	1147668	1	2934	1304	1630	5868	17.945
mau	ORY:8	Y_scaffold1	1	330	1151852	1152180	1	2952	1312	1640	5904	17.9453
mau	ORY:8	Y_scaffold1	1	330	1155925	1156253	1	2296	1312	1640	5248	15.9514
mau	ORY:8	Y_scaffold1	1	330	1163962	1164290	1	2952	2624	2296	7872	23.9271
mau	Pp1-Y1:1	Y_scaffold2	1	954	427770	426812	1	48017	36862	43004	127883	133.35
mau	Pp1-Y1:1	Y_scaffold2	1	954	515244	514286	1	229528	116607	189634	535769	558.675
mau	Pp1-Y2:1	Y_Contig136	1	1286	61517	60284	1	389780	241064	346551	977395	792.054
mau	Pp1-Y2:1	Y_scaffold1	1	1286	5143039	5144318	1	99407	61120	80913	241440	188.625
mau	Ppr-Y:1	Y_scaffold4	1	208	2476468	2476261	1	6137	5752	5531	17420	83.75
mau	Ppr-Y:1	Y_scaffold4	1	208	2479762	2479555	1	8522	4708	6051	19281	92.6971
mau	Ppr-Y:2	Y_scaffold4	1	284	2337579	2337296	1	5037	887	6000	11924	41.9859
mau	Ppr-Y:3	Y_scaffold4	1	179	2038313	2038135	1	1468	810	2101	4379	24.4637
mau	Ppr-Y:4	Y_scaffold4	1	577	1647657	1647081	1	17824	13707	12468	43999	76.2548
mau	Ppr-Y:5	Y_scaffold4	1	335	1325934	1325600	1	13064	7966	4578	25608	76.4418
mau	Ppr-Y:6	Y_scaffold4	1	127	807891	807765	1	6360	4230	4570	15160	119.37
mau	PRY:1	Y_Contig136	1	1884	56467	58350	1	25114	24929	24251	74294	39.4342
mau	PRY:1	Y_scaffold1	1	1884	5154392	5151379	2	557	1297	909	2763	0.916722
mau	PRY:1	Y_Contig136	1	2475	33403	35886	1	1951	0	0	1951	0.785427
mau	PRY:1	Y_Contig136	1	2475	43614	46097	1	21536	15557	15058	52151	20.9948
mau	PRY:1	Y_scaffold1	1	2475	5189746	5182185	2	31413	52777	6315	90505	11.9684
mau	PRY:2	Y_scaffold1	4	658	5261393	5260739	1	7345	5558	4801	17704	27.029
mau	PRY:3	Y_scaffold1	1	609	5325084	5324476	1	16611	13478	8262	38351	62.9737
mau	PRY:3	Y_scaffold1	1	609	5334555	5333947	1	3980	3556	2342	9878	16.22
mau	wdy:1	Y_scaffold3	1	610	11026	11635	1	16211	10821	27921	54953	90.0869
mau	wdy:2	Y_scaffold3	2	1081	231468	232547	1	27335	18854	45711	91900	85.0926
mau	wdy:3	Y_scaffold3	16	455	476685	476245	1	13640	6600	18040	38280	86.8027
mau	wdy:3	Y_scaffold3	1	455	502210	502664	1	18323	11732	29115	59170	130.044
mau	wdy:4	Y_scaffold3	3	142	476182	476043	1	4309	2085	5699	12093	86.3786
mau	wdy:4	Y_scaffold3	1	199	502725	502923	1	8253	6300	8662	23215	116.658
mau	wdy:5	Y_scaffold3	1	201	1103109	1103309	1	6384	5564	8139	20087	99.9353
mau	wdy:6	Y_scaffold3	618	848	1106936	1107216	2	0	210	0	210	0.747331
mau	wdy:6	Y_scaffold3	1	848	1103371	1104268	2	45203	24294	49643	119140	132.673
sim	ARY:1	Y_Contig_135	3	170	1141038	1141205	1	83427	94351	NA	177778	1058.2
sim	ARY:1	Y_Contig_135	3	170	1145077	1145244	1	42177	34954	NA	77131	459.113
sim	ARY:1	Y_Contig_135	1	170	1414577	1414746	1	33712	59445	NA	93157	547.982
sim	ARY:1	Y_Contig_135	1	170	2308219	2308050	1	111928	70366	NA	182294	1072.32
sim	ARY:2	Y_Contig_135	3	224	1141038	1141259	1	108400	124384	NA	232784	1048.58
sim	ARY:2	Y_Contig_135	3	224	1145077	1145298	1	51578	44807	NA	96385	434.167
sim	ARY:2	Y_Contig_135	1	224	1414577	1414800	1	39844	68616	NA	108460	484.196
sim	ARY:2	Y_Contig_135	1	224	2308219	2307996	1	143756	89297	NA	233053	1040.42
sim	ARY:3	Y_Contig_135	1	168	1141320	1141487	1	114844	77182	NA	192026	1143.01
sim	ARY:3	Y_Contig_135	1	168	1145359	1145526	1	44909	31531	NA	76440	455
sim	ARY:3	Y_Contig_135	1	168	1414861	1415028	1	51330	63736	NA	115066	684.917
sim	ARY:3	Y_Contig_135	1	168	2307935	2307768	1	130253	76118	NA	206371	1228.4
sim	ARY:4	Y_Contig_135	2	170	1141540	1141708	1	90669	62358	NA	153027	905.485
sim	ARY:4	Y_Contig_135	2	170	1145579	1145747	1	45285	29930	NA	75215	445.059
sim	ARY:4	Y_Contig_135	2	170	1415080	1415248	1	49639	70579	NA	120218	711.349
sim	ARY:4	Y_Contig_135	2	170	2307715	2307547	1	140587	111347	NA	251934	1490.73
sim	ARY:5	Y_Contig_135	1	207	1141755	1141960	1	9257	13266	NA	22523	109.335
sim	ARY:5	Y_Contig_135	1	207	1145794	1145999	1	4235	5762	NA	9997	48.5291
sim	ARY:5	Y_Contig_135	1	343	1415308	1415650	1	100429	178731	NA	279160	813.878
sim	ARY:5	Y_Contig_135	1	343	2307487	2307145	1	319650	244857	NA	564507	1645.79
sim	ARY:6	Y_Contig_135	47	157	1141959	1142069	1	1305	3257	NA	4562	41.0991
sim	ARY:6	Y_Contig_135	47	432	1145998	1146380	1	16264	14239	NA	30503	79.6423
sim	ARY:6	Y_Contig_135	1	432	1415708	1416142	1	75153	66905	NA	142058	326.57
sim	ARY:6	Y_Contig_135	1	432	2307087	2306653	1	301059	144179	NA	445238	1023.54
sim	CCY:1	Y_scaffold1	1	1071	487635	488744	1	30484	105221	NA	135705	122.257
sim	CCY:2	Y_scaffold1	1	156	978444	978599	1	3029	15841	NA	18870	120.962
sim	CCY:3	Y_scaffold1	3	701	1731861	1732559	1	11577	45917	NA	57494	82.2518
sim	CCY:4	Y_scaffold1	1	337	1732560	1732920	1	9887	30537	NA	40424	111.978
sim	CCY:5	Y_scaffold1	1	1392	1732921	1734168	2	48573	150050	NA	198623	159.153
sim	CCY:6	Y_scaffold1	1	345	1734169	1734567	1	17284	30000	NA	47284	118.506
sim	kl-2:1	Y_Contig_135	1	665	1089645	1088981	1	9890	14407	NA	24297	36.5368
sim	kl-2:10	Y_Contig_135	327	417	421622	421571	2	0	0	NA	0	0
sim	kl-2:10	Y_Contig_135	288	417	463807	463717	5	0	0	NA	0	0
sim	kl-2:10	Y_Contig_135	813	943	472994	472883	1	0	0	NA	0	0
sim	kl-2:10	Y_Contig_135	287	417	484902	484811	5	0	0	NA	0	0
sim	kl-2:10	Y_Contig_135	419	943	421429	420999	2	0	0	NA	0	0
sim	kl-2:10	Y_Contig_135	419	943	433420	432990	2	0	0	NA	0	0
sim	kl-2:10	Y_Contig_135	1	646	437867	437222	1	0	2544	NA	2544	3.93808
sim	kl-2:10	Y_Contig_135	1	646	448084	447416	1	242	0	NA	242	0.361734
sim	kl-2:10	Y_Contig_135	1	646	449567	448902	1	0	503	NA	503	0.755255
sim	kl-2:10	Y_Contig_135	1	738	481536	480780	1	0	246	NA	246	0.324967
sim	kl-2:10	Y_Contig_135	1	943	436438	436084	2	593	492	NA	1085	3.05634
sim	kl-2:10	Y_Contig_135	1	943	492512	491570	1	25627	39581	NA	65208	69.1495
sim	kl-2:11	Y_Contig_135	1	494	436023	435547	1	427	7	NA	434	0.909853
sim	kl-2:11	Y_Contig_135	1	494	472822	472329	1	2505	2687	NA	5192	10.5101
sim	kl-2:11	Y_Contig_135	1	494	491509	491016	1	20340	22266	NA	42606	86.247
sim	kl-2:12	Y_Contig_135	1	113	472266	472154	1	0	112	NA	112	0.99115
sim	kl-2:12	Y_Contig_135	1	170	412076	411907	1	0	31	NA	31	0.182353
sim	kl-2:12	Y_Contig_135	1	554	435484	434947	1	0	452	NA	452	0.840149
sim	kl-2:12	Y_Contig_135	1	554	490953	490400	1	40611	41630	NA	82241	148.449
sim	kl-2:2	Y_Contig_135	1	1850	622693	620844	1	4003	7281	NA	11284	6.09946
sim	kl-2:3	Y_Contig_135	1	682	580163	579482	1	0	1496	NA	1496	2.19355
sim	kl-2:4	Y_Contig_135	1	385	579427	579043	1	949	1726	NA	2675	6.94805
sim	kl-2:5	Y_Contig_135	1	444	578152	577709	1	68	581	NA	649	1.46171
sim	kl-2:6	Y_Contig_135	1	1600	500066	498467	1	1384	9390	NA	10774	6.73375
sim	kl-2:7	Y_Contig_135	1	1580	498466	496887	1	966	12765	NA	13731	8.69051
sim	kl-2:8	Y_Contig_135	3512	3752	448904	448664	1	0	0	NA	0	0
sim	kl-2:8	Y_Contig_135	3512	4082	437224	436654	1	0	1824	NA	1824	3.1944
sim	kl-2:8	Y_Contig_135	3512	4082	447418	438083	2	450	1429	NA	1879	0.201264
sim	kl-2:8	Y_Contig_135	1101	2329	381768	380579	1	0	0	NA	0	0
sim	kl-2:8	Y_Contig_135	1312	3752	459653	450147	3	488	251	NA	739	0.0777322
sim	kl-2:8	Y_Contig_135	1312	3752	463402	461117	2	502	0	NA	502	0.219598
sim	kl-2:8	Y_Contig_135	1312	3752	484496	482099	1	2338	5209	NA	7547	3.14721
sim	kl-2:8	Y_Contig_135	1	4082	496814	492733	1	21016	57612	NA	78628	19.2621
sim	kl-2:9	Y_Contig_135	3	105	438018	437921	1	0	194	NA	194	1.97959
sim	kl-2:9	Y_Contig_135	1	105	436591	436492	1	122	115	NA	237	2.37
sim	kl-2:9	Y_Contig_135	1	105	492670	492566	1	1121	3531	NA	4652	44.3048
sim	kl-2:9	Y_Contig_135	28	105	448599	448522	1	0	0	NA	0	0
sim	kl-2:9	Y_Contig_135	28	105	450082	450005	1	0	0	NA	0	0
sim	kl-2:9	Y_Contig_135	28	105	461052	460975	1	0	0	NA	0	0
sim	kl-2:9	Y_Contig_135	28	105	482034	481957	1	0	0	NA	0	0
sim	kl-3:1	Y_scaffold2	1	1126	153213	154338	1	6894	9140	NA	16034	14.2398
sim	kl-3:10	Y_scaffold2	1	1383	316174	317556	1	3329	21285	NA	24614	17.7975
sim	kl-3:11	Y_scaffold2	1	335	339179	339513	1	916	7052	NA	7968	23.7851
sim	kl-3:12	Y_scaffold2	2	809	367473	368280	1	5636	26406	NA	32042	39.6559
sim	kl-3:13	Y_scaffold2	1	1461	368554	370014	1	7643	34329	NA	41972	28.7283
sim	kl-3:14	Y_scaffold2	1	58	430798	430855	1	415	2924	NA	3339	57.569
sim	kl-3:14	Y_scaffold2	1	2876	431465	434340	1	101168	195615	NA	296783	103.193
sim	kl-3:15	Y_scaffold2	1	179	434396	434574	1	13238	21948	NA	35186	196.57
sim	kl-3:16	Y_scaffold2	1	672	511784	512455	1	6317	9772	NA	16089	23.942
sim	kl-3:16	Y_scaffold2	1	672	514265	514936	1	23411	22700	NA	46111	68.6176
sim	kl-3:16	Y_scaffold2	1	672	516754	517319	2	24230	35904	NA	60134	106.244
sim	kl-3:2	Y_scaffold2	1	104	160261	160364	1	765	62	NA	827	7.95192
sim	kl-3:3	Y_scaffold2	1	1288	160422	161763	1	3219	10326	NA	13545	10.0931
sim	kl-3:4	Y_scaffold2	1	169	219984	220152	1	174	617	NA	791	4.68047
sim	kl-3:5	Y_scaffold2	1	406	220217	220622	1	757	1998	NA	2755	6.78571
sim	kl-3:6	Y_scaffold2	1	212	282674	282885	1	1158	1185	NA	2343	11.0519
sim	kl-3:7	Y_scaffold2	1	517	282938	283454	1	1148	6313	NA	7461	14.4313
sim	kl-3:8	Y_scaffold2	1	130	313721	313850	1	146	748	NA	894	6.87692
sim	kl-3:9	Y_scaffold2	1	2213	313904	316117	1	5250	26710	NA	31960	14.4354
sim	kl-5:1	Y_scaffold4	192	293	969474	969575	1	12002	11021	NA	23023	225.716
sim	kl-5:1	Y_scaffold4	1	196	949713	949908	1	37056	38908	NA	75964	387.571
sim	kl-5:10	Y_scaffold4	102	292	771030	771249	1	0	6026	NA	6026	27.3909
sim	kl-5:10	Y_scaffold4	1	292	769806	770097	1	4193	6875	NA	11068	37.9041
sim	kl-5:11	Y_scaffold4	1	113	769642	769754	1	1281	3009	NA	4290	37.9646
sim	kl-5:12	Y_scaffold4	5	568	769021	769584	1	3409	14107	NA	17516	31.0567
sim	kl-5:13	Y_scaffold4	1	266	768699	768964	1	1996	5116	NA	7112	26.7368
sim	kl-5:14	Y_scaffold4	1	340	768306	768645	1	3269	5831	NA	9100	26.7647
sim	kl-5:15	Y_scaffold4	1	260	767989	768248	1	1710	4837	NA	6547	25.1808
sim	kl-5:16	Y_scaffold4	1	174	767760	767933	1	197	2599	NA	2796	16.069
sim	kl-5:17	Y_Contig_100	33	129	27256	27352	1	0	0	NA	0	0
sim	kl-5:17	Y_Contig_100	33	129	30046	30142	1	4962	1695	NA	6657	68.6289
sim	kl-5:17	Y_scaffold4	33	129	650774	650870	1	494	574	NA	1068	11.0103
sim	kl-5:17	Y_scaffold4	33	129	655905	656001	1	436	767	NA	1203	12.4021
sim	kl-5:17	Y_scaffold4	33	129	725921	726017	1	443	734	NA	1177	12.134
sim	kl-5:17	Y_scaffold4	1	98	724436	724587	2	0	14	NA	14	0.0921053
sim	kl-5:2	Y_scaffold4	1	2760	871255	874017	1	177486	310392	NA	487878	176.575
sim	kl-5:3	Y_scaffold4	1	167	871037	871203	1	3186	11919	NA	15105	90.4491
sim	kl-5:4	Y_scaffold4	1	139	870840	870978	1	2894	10667	NA	13561	97.5612
sim	kl-5:5	Y_scaffold4	1	1673	836143	837815	1	5177	54876	NA	60053	35.8954
sim	kl-5:5	Y_scaffold4	1674	3930	867311	869628	2	26336	112429	NA	138765	59.8641
sim	kl-5:6	Y_scaffold4	1	2808	781810	784617	1	6115	51821	NA	57936	20.6325
sim	kl-5:7	Y_scaffold4	1	452	781312	781763	1	741	5883	NA	6624	14.6549
sim	kl-5:8	Y_scaffold4	1	831	780424	781254	1	1988	13685	NA	15673	18.8604
sim	kl-5:9	Y_scaffold4	1	154	770156	770309	1	1078	5967	NA	7045	45.7468
sim	kl-5:9	Y_scaffold4	1	154	771308	771461	1	255	3763	NA	4018	26.0909
sim	ORY:1	Y_Contig_1	1	162	3580	8800	2	1381	729	NA	2110	0.404137
sim	ORY:1	Y_Contig_1	1	162	16268	16429	1	504	648	NA	1152	7.11111
sim	ORY:1	Y_Contig_1	1	162	21517	21678	1	15227	16720	NA	31947	197.204
sim	ORY:2	Y_Contig_1	1	350	8869	9195	1	0	0	NA	0	0
sim	ORY:2	Y_Contig_1	1	350	16498	16817	1	0	776	NA	776	2.425
sim	ORY:2	Y_Contig_1	1	350	21747	22096	1	30430	46403	NA	76833	219.523
sim	ORY:3	Y_Contig_1	1	393	236322	236714	1	9016	34104	NA	43120	109.72
sim	ORY:3	Y_Contig_1	1	624	298764	299387	1	16135	52742	NA	68877	110.38
sim	ORY:4	Y_Contig_1	1	317	299441	299757	1	11854	34246	NA	46100	145.426
sim	ORY:5	Y_Contig_1	1	179	462850	463028	1	10616	22293	NA	32909	183.849
sim	ORY:6	Y_Contig_1	1	644	463312	463955	1	22775	46365	NA	69140	107.36
sim	ORY:7	Y_Contig_1	1	139	464020	464158	1	6310	11190	NA	17500	125.899
sim	ORY:8	Y_Contig_1	1	330	1457481	1457810	1	10683	13935	NA	24618	74.6
sim	ORY:8	Y_Contig_1	1	330	1528839	1529168	1	1355	1232	NA	2587	7.83939
sim	Pp1-Y1:1	Y_scaffold4	1	954	465076	464118	1	139339	135197	NA	274536	286.273
sim	Pp1-Y2:1	Y_scaffold2	1	1286	101035	102314	1	83265	99807	NA	183072	143.025
sim	Pp1-Y2:1	Y_scaffold4	1	1286	221896	220617	1	132490	176767	NA	309257	241.607
sim	Ppr-Y:1	Y_scaffold3	1	208	3628	3835	1	13518	24477	NA	37995	182.668
sim	Ppr-Y:2	Y_scaffold3	1	284	150237	150520	1	2504	4508	NA	7012	24.6901
sim	Ppr-Y:3	Y_scaffold3	1	179	423974	424152	1	4235	3587	NA	7822	43.6983
sim	Ppr-Y:4	Y_scaffold3	1	577	552067	552643	1	14308	27073	NA	41381	71.7175
sim	Ppr-Y:5	Y_scaffold3	1	335	699586	699920	1	11173	15502	NA	26675	79.6269
sim	Ppr-Y:6	Y_scaffold3	1	127	791906	792032	1	4909	9340	NA	14249	112.197
sim	PRY:1	Y_scaffold4	332	2475	215872	218037	1	0	251	NA	251	0.115882
sim	PRY:1	Y_scaffold2	1	2475	121304	104453	3	12918	49513	NA	62431	3.70466
sim	PRY:1	Y_scaffold2	1	2475	136231	133784	1	21403	49710	NA	71113	29.0494
sim	PRY:1	Y_scaffold2	1	2475	144805	142322	1	17149	38797	NA	55946	22.5225
sim	PRY:1	Y_scaffold4	1	2475	194784	196795	2	285	2520	NA	2805	1.39414
sim	PRY:2	Y_scaffold4	4	658	163472	164126	1	4714	15407	NA	20121	30.7191
sim	PRY:3	Y_scaffold4	1	609	24316	24924	1	8484	11818	NA	20302	33.3366
sim	wdy:1	Y_scaffold5	155	610	611828	612264	1	3924	20492	NA	24416	55.8719
sim	wdy:1	Y_scaffold5	1	610	348262	348871	1	14602	38038	NA	52640	86.2951
sim	wdy:1	Y_scaffold5	1	610	657195	657623	2	9380	26363	NA	35743	83.317
sim	wdy:2	Y_scaffold5	2	1081	702390	703469	1	33273	68801	NA	102074	94.513
sim	wdy:3	Y_scaffold5	16	455	787307	787745	1	13025	27227	NA	40252	91.6902
sim	wdy:3	Y_scaffold5	1	455	893763	894217	1	18024	34454	NA	52478	115.336
sim	wdy:4	Y_scaffold5	1	199	787806	788004	1	5223	11856	NA	17079	85.8241
sim	wdy:4	Y_scaffold5	1	199	894278	894476	1	7060	17477	NA	24537	123.302
sim	wdy:5	Y_scaffold5	1	201	1038020	1038220	1	12352	14875	NA	27227	135.458
sim	wdy:6	Y_scaffold5	1	848	1038282	1039179	2	52678	78881	NA	131559	146.502
sec	ARY:1	Y_scaffold5	28	170	781789	781647	1	NA	NA	NA	NA	NA
sec	ARY:1	Y_Contig186	13	170	267423	267266	1	NA	NA	NA	NA	NA
sec	ARY:1	Y_Contig186	1	170	115881	116052	1	NA	NA	NA	NA	NA
sec	ARY:1	Y_Contig186	1	170	436191	436022	1	NA	NA	NA	NA	NA
sec	ARY:1	Y_scaffold5	1	170	876774	876943	1	NA	NA	NA	NA	NA
sec	ARY:2	Y_scaffold5	28	224	781789	781593	1	NA	NA	NA	NA	NA
sec	ARY:2	Y_Contig186	13	224	267423	267212	1	NA	NA	NA	NA	NA
sec	ARY:2	Y_Contig186	1	224	115881	116106	1	NA	NA	NA	NA	NA
sec	ARY:2	Y_Contig186	1	224	436191	435968	1	NA	NA	NA	NA	NA
sec	ARY:2	Y_scaffold5	1	224	876774	876997	1	NA	NA	NA	NA	NA
sec	ARY:3	Y_Contig186	1	161	435907	435747	1	NA	NA	NA	NA	NA
sec	ARY:3	Y_Contig186	1	168	116167	116334	1	NA	NA	NA	NA	NA
sec	ARY:3	Y_Contig186	1	168	267151	266984	1	NA	NA	NA	NA	NA
sec	ARY:3	Y_scaffold5	1	168	781532	781365	1	NA	NA	NA	NA	NA
sec	ARY:3	Y_scaffold5	1	168	877058	877225	1	NA	NA	NA	NA	NA
sec	ARY:4	Y_Contig186	2	170	116387	116555	1	NA	NA	NA	NA	NA
sec	ARY:4	Y_Contig186	2	170	266932	266764	1	NA	NA	NA	NA	NA
sec	ARY:4	Y_Contig186	2	170	435719	435552	1	NA	NA	NA	NA	NA
sec	ARY:4	Y_scaffold5	2	170	877278	877446	1	NA	NA	NA	NA	NA
sec	ARY:5	Y_Contig186	1	207	257817	252183	2	NA	NA	NA	NA	NA
sec	ARY:5	Y_Contig186	1	207	262070	261864	1	NA	NA	NA	NA	NA
sec	ARY:5	Y_scaffold5	1	207	763177	762971	1	NA	NA	NA	NA	NA
sec	ARY:5	Y_scaffold5	1	207	767521	767315	1	NA	NA	NA	NA	NA
sec	ARY:5	Y_scaffold5	1	207	777197	771567	2	NA	NA	NA	NA	NA
sec	ARY:5	Y_scaffold5	173	207	781305	781271	1	NA	NA	NA	NA	NA
sec	ARY:5	Y_scaffold5	1	207	877506	877712	1	NA	NA	NA	NA	NA
sec	ARY:5	Y_Contig186	1	343	116615	116957	1	NA	NA	NA	NA	NA
sec	ARY:5	Y_Contig186	1	343	266704	266362	1	NA	NA	NA	NA	NA
sec	ARY:6	Y_scaffold5	47	432	877711	878098	1	NA	NA	NA	NA	NA
sec	ARY:6	Y_Contig186	1	432	117015	117451	1	NA	NA	NA	NA	NA
sec	ARY:6	Y_Contig186	1	432	435424	434991	1	NA	NA	NA	NA	NA
sec	ARY:6	Y_Contig186	47	480	252184	251760	2	NA	NA	NA	NA	NA
sec	ARY:6	Y_Contig186	47	480	261865	261434	2	NA	NA	NA	NA	NA
sec	ARY:6	Y_scaffold5	47	480	762972	762542	2	NA	NA	NA	NA	NA
sec	ARY:6	Y_scaffold5	47	480	767316	766885	2	NA	NA	NA	NA	NA
sec	ARY:6	Y_scaffold5	47	480	771568	771144	2	NA	NA	NA	NA	NA
sec	ARY:6	Y_scaffold5	47	480	781272	780846	2	NA	NA	NA	NA	NA
sec	ARY:6	Y_Contig186	1	480	266304	265707	3	NA	NA	NA	NA	NA
sec	CCY:1	Y_scaffold1	1	1071	321004	322113	1	NA	NA	NA	NA	NA
sec	CCY:2	Y_scaffold1	1	156	739060	739215	1	NA	NA	NA	NA	NA
sec	CCY:3	Y_scaffold1	3	701	2141761	2142459	1	NA	NA	NA	NA	NA
sec	CCY:4	Y_scaffold1	1	337	2142460	2142820	1	NA	NA	NA	NA	NA
sec	CCY:5	Y_scaffold1	1	1392	2142821	2144068	2	NA	NA	NA	NA	NA
sec	CCY:6	Y_scaffold1	1	345	2144069	2144467	1	NA	NA	NA	NA	NA
sec	CCY:6	Y_scaffold1	1	345	2145235	2145633	1	NA	NA	NA	NA	NA
sec	kl-2:1	Y_scaffold2	1	665	171236	171900	1	NA	NA	NA	NA	NA
sec	kl-2:10	Y_scaffold2	1	738	645312	646048	1	NA	NA	NA	NA	NA
sec	kl-2:10	Y_scaffold2	1	738	671313	672227	2	NA	NA	NA	NA	NA
sec	kl-2:10	Y_scaffold2	1	738	677781	678330	2	NA	NA	NA	NA	NA
sec	kl-2:10	Y_scaffold2	1	943	615622	616564	1	NA	NA	NA	NA	NA
sec	kl-2:10	Y_scaffold2	1	943	630073	630880	2	NA	NA	NA	NA	NA
sec	kl-2:10	Y_scaffold2	1	943	685761	696407	2	NA	NA	NA	NA	NA
sec	kl-2:10	Y_scaffold2	1	943	793544	794381	2	NA	NA	NA	NA	NA
sec	kl-2:10	Y_scaffold2	582	368	619375	619480	2	NA	NA	NA	NA	NA
sec	kl-2:10	Y_scaffold2	582	368	621322	621427	2	NA	NA	NA	NA	NA
sec	kl-2:11	Y_scaffold2	1	494	616625	617118	1	NA	NA	NA	NA	NA
sec	kl-2:11	Y_scaffold2	1	494	630935	631500	2	NA	NA	NA	NA	NA
sec	kl-2:11	Y_scaffold2	1	494	696468	697033	2	NA	NA	NA	NA	NA
sec	kl-2:12	Y_scaffold2	382	554	619546	619718	1	NA	NA	NA	NA	NA
sec	kl-2:12	Y_scaffold2	1	517	697096	697612	1	NA	NA	NA	NA	NA
sec	kl-2:12	Y_scaffold2	1	519	631563	632081	1	NA	NA	NA	NA	NA
sec	kl-2:12	Y_scaffold2	1	519	725514	726092	2	NA	NA	NA	NA	NA
sec	kl-2:12	Y_scaffold2	1	519	729989	730567	2	NA	NA	NA	NA	NA
sec	kl-2:12	Y_scaffold2	1	519	750979	751557	2	NA	NA	NA	NA	NA
sec	kl-2:12	Y_scaffold2	1	519	779147	779725	2	NA	NA	NA	NA	NA
sec	kl-2:12	Y_scaffold2	1	554	617181	617734	1	NA	NA	NA	NA	NA
sec	kl-2:2	Y_scaffold2	1	1850	297529	299378	1	NA	NA	NA	NA	NA
sec	kl-2:3	Y_scaffold2	1	682	404113	404794	1	NA	NA	NA	NA	NA
sec	kl-2:4	Y_scaffold2	1	385	404849	405233	1	NA	NA	NA	NA	NA
sec	kl-2:5	Y_scaffold2	1	444	406096	406539	1	NA	NA	NA	NA	NA
sec	kl-2:6	Y_scaffold2	1	1600	608075	609674	1	NA	NA	NA	NA	NA
sec	kl-2:7	Y_scaffold2	1	1580	609675	611254	1	NA	NA	NA	NA	NA
sec	kl-2:8	Y_scaffold2	2039	2544	725025	725463	2	NA	NA	NA	NA	NA
sec	kl-2:8	Y_scaffold2	2039	2544	729500	729938	2	NA	NA	NA	NA	NA
sec	kl-2:8	Y_scaffold2	2039	2544	750490	750928	2	NA	NA	NA	NA	NA
sec	kl-2:8	Y_scaffold2	2039	2544	778658	779096	2	NA	NA	NA	NA	NA
sec	kl-2:8	Y_scaffold2	1	590	815843	816285	2	NA	NA	NA	NA	NA
sec	kl-2:8	Y_scaffold2	1444	4082	633846	636487	1	NA	NA	NA	NA	NA
sec	kl-2:8	Y_scaffold2	1312	4082	621424	624128	1	NA	NA	NA	NA	NA
sec	kl-2:8	Y_scaffold2	1312	4082	785141	793367	4	NA	NA	NA	NA	NA
sec	kl-2:8	Y_scaffold2	1	4082	611320	615401	1	NA	NA	NA	NA	NA
sec	kl-2:9	Y_scaffold2	4	105	636549	636649	1	NA	NA	NA	NA	NA
sec	kl-2:9	Y_scaffold2	1	105	615464	615568	1	NA	NA	NA	NA	NA
sec	kl-2:9	Y_scaffold2	1	105	793417	793516	1	NA	NA	NA	NA	NA
sec	kl-2:9	Y_scaffold2	18	105	624213	624300	1	NA	NA	NA	NA	NA
sec	kl-3:1	Y_scaffold3	18	1122	52360	53464	1	NA	NA	NA	NA	NA
sec	kl-3:10	Y_scaffold3	1	1383	327559	328941	1	NA	NA	NA	NA	NA
sec	kl-3:11	Y_scaffold3	1	335	407014	407348	1	NA	NA	NA	NA	NA
sec	kl-3:12	Y_scaffold3	2	809	469802	470609	1	NA	NA	NA	NA	NA
sec	kl-3:13	Y_scaffold3	1	1461	532003	533463	1	NA	NA	NA	NA	NA
sec	kl-3:14	Y_scaffold3	1	2876	707563	710438	1	NA	NA	NA	NA	NA
sec	kl-3:15	Y_scaffold3	1	179	710494	710672	1	NA	NA	NA	NA	NA
sec	kl-3:16	Y_scaffold3	1	672	888151	888822	1	NA	NA	NA	NA	NA
sec	kl-3:2	Y_scaffold3	1	104	58869	58972	1	NA	NA	NA	NA	NA
sec	kl-3:3	Y_scaffold3	1	1288	59030	60371	1	NA	NA	NA	NA	NA
sec	kl-3:4	Y_scaffold3	1	169	124629	124797	1	NA	NA	NA	NA	NA
sec	kl-3:5	Y_scaffold3	1	406	124862	125267	1	NA	NA	NA	NA	NA
sec	kl-3:6	Y_scaffold3	1	212	310793	311004	1	NA	NA	NA	NA	NA
sec	kl-3:7	Y_scaffold3	1	517	311057	311573	1	NA	NA	NA	NA	NA
sec	kl-3:8	Y_scaffold3	1	130	325106	325235	1	NA	NA	NA	NA	NA
sec	kl-3:9	Y_scaffold3	1	2213	325289	327501	1	NA	NA	NA	NA	NA
sec	kl-5:1	Y_scaffold4	192	293	49694	49593	1	NA	NA	NA	NA	NA
sec	kl-5:1	Y_scaffold4	1	196	110964	110769	1	NA	NA	NA	NA	NA
sec	kl-5:10	Y_Contig113	102	292	479859	480078	1	NA	NA	NA	NA	NA
sec	kl-5:10	Y_scaffold4	102	292	483174	482955	1	NA	NA	NA	NA	NA
sec	kl-5:10	Y_Contig113	1	291	472040	472330	1	NA	NA	NA	NA	NA
sec	kl-5:10	Y_scaffold4	1	292	491868	491577	1	NA	NA	NA	NA	NA
sec	kl-5:11	Y_Contig113	1	113	471876	471988	1	NA	NA	NA	NA	NA
sec	kl-5:11	Y_scaffold4	1	113	492032	491920	1	NA	NA	NA	NA	NA
sec	kl-5:12	Y_Contig113	5	568	471269	471818	1	NA	NA	NA	NA	NA
sec	kl-5:12	Y_scaffold4	5	568	492652	492090	1	NA	NA	NA	NA	NA
sec	kl-5:13	Y_Contig113	1	266	470946	471211	1	NA	NA	NA	NA	NA
sec	kl-5:13	Y_scaffold4	1	266	492975	492710	1	NA	NA	NA	NA	NA
sec	kl-5:14	Y_Contig113	2	340	470554	470892	1	NA	NA	NA	NA	NA
sec	kl-5:14	Y_scaffold4	2	340	493367	493029	1	NA	NA	NA	NA	NA
sec	kl-5:15	Y_Contig113	1	260	470236	470495	1	NA	NA	NA	NA	NA
sec	kl-5:15	Y_scaffold4	1	260	493685	493426	1	NA	NA	NA	NA	NA
sec	kl-5:16	Y_Contig113	1	174	470007	470180	1	NA	NA	NA	NA	NA
sec	kl-5:16	Y_scaffold4	1	174	493914	493741	1	NA	NA	NA	NA	NA
sec	kl-5:17	Y_Contig204	57	129	32570	32498	1	NA	NA	NA	NA	NA
sec	kl-5:17	Y_Contig204	33	120	101499	101412	1	NA	NA	NA	NA	NA
sec	kl-5:17	Y_Contig204	33	120	111393	111306	1	NA	NA	NA	NA	NA
sec	kl-5:17	Y_Contig204	33	129	2377	2281	1	NA	NA	NA	NA	NA
sec	kl-5:17	Y_Contig204	33	129	6213	6117	1	NA	NA	NA	NA	NA
sec	kl-5:17	Y_Contig204	33	129	23240	23144	1	NA	NA	NA	NA	NA
sec	kl-5:17	Y_Contig204	33	129	61504	61408	1	NA	NA	NA	NA	NA
sec	kl-5:17	Y_Contig204	33	129	68305	68209	1	NA	NA	NA	NA	NA
sec	kl-5:17	Y_scaffold4	33	129	527066	526970	1	NA	NA	NA	NA	NA
sec	kl-5:17	Y_scaffold4	33	129	582930	582834	1	NA	NA	NA	NA	NA
sec	kl-5:17	Y_scaffold4	33	129	587549	587453	1	NA	NA	NA	NA	NA
sec	kl-5:17	Y_scaffold4	33	129	600453	600357	1	NA	NA	NA	NA	NA
sec	kl-5:17	Y_scaffold4	33	129	603744	603648	1	NA	NA	NA	NA	NA
sec	kl-5:17	Y_scaffold4	33	129	607064	606968	1	NA	NA	NA	NA	NA
sec	kl-5:17	Y_scaffold4	33	129	610801	610705	1	NA	NA	NA	NA	NA
sec	kl-5:2	Y_scaffold4	2337	2760	237737	237315	1	NA	NA	NA	NA	NA
sec	kl-5:2	Y_scaffold4	2337	2760	242728	242306	1	NA	NA	NA	NA	NA
sec	kl-5:2	Y_scaffold4	2337	2760	247681	247258	1	NA	NA	NA	NA	NA
sec	kl-5:2	Y_scaffold4	2337	2760	252910	252487	1	NA	NA	NA	NA	NA
sec	kl-5:2	Y_scaffold4	2337	2760	257935	257511	1	NA	NA	NA	NA	NA
sec	kl-5:2	Y_scaffold4	2337	2760	263320	262897	1	NA	NA	NA	NA	NA
sec	kl-5:2	Y_scaffold4	2337	2760	301173	300750	1	NA	NA	NA	NA	NA
sec	kl-5:2	Y_scaffold4	2337	2760	307563	307140	1	NA	NA	NA	NA	NA
sec	kl-5:2	Y_scaffold4	2337	2760	312844	312527	2	NA	NA	NA	NA	NA
sec	kl-5:2	Y_scaffold4	1	2760	319883	317121	1	NA	NA	NA	NA	NA
sec	kl-5:3	Y_scaffold4	1	167	320102	319936	1	NA	NA	NA	NA	NA
sec	kl-5:4	Y_scaffold4	1	139	320299	320161	1	NA	NA	NA	NA	NA
sec	kl-5:5	Y_scaffold4	1	1673	378452	376780	1	NA	NA	NA	NA	NA
sec	kl-5:5	Y_scaffold4	1674	3930	349886	347569	2	NA	NA	NA	NA	NA
sec	kl-5:6	Y_scaffold4	1	2808	436012	433205	1	NA	NA	NA	NA	NA
sec	kl-5:7	Y_scaffold4	1	452	436510	436059	1	NA	NA	NA	NA	NA
sec	kl-5:8	Y_scaffold4	1	831	437398	436568	1	NA	NA	NA	NA	NA
sec	kl-5:9	Y_Contig113	1	154	478956	479109	1	NA	NA	NA	NA	NA
sec	kl-5:9	Y_Contig113	1	154	480137	480290	1	NA	NA	NA	NA	NA
sec	kl-5:9	Y_scaffold4	1	154	482896	482743	1	NA	NA	NA	NA	NA
sec	kl-5:9	Y_scaffold4	1	154	491518	491365	1	NA	NA	NA	NA	NA
sec	ORY:1	Y_Contig178	1	162	1963052	1962891	1	NA	NA	NA	NA	NA
sec	ORY:1	Y_Contig178	1	162	1972690	1972529	1	NA	NA	NA	NA	NA
sec	ORY:2	Y_Contig178	1	350	1962825	1962476	1	NA	NA	NA	NA	NA
sec	ORY:2	Y_Contig178	1	350	1972460	1972141	1	NA	NA	NA	NA	NA
sec	ORY:3	Y_Contig178	1	393	1676057	1676449	1	NA	NA	NA	NA	NA
sec	ORY:3	Y_Contig178	1	624	1630244	1629621	1	NA	NA	NA	NA	NA
sec	ORY:4	Y_Contig178	1	317	1629567	1629251	1	NA	NA	NA	NA	NA
sec	ORY:5	Y_Contig178	1	179	1481575	1481397	1	NA	NA	NA	NA	NA
sec	ORY:6	Y_Contig178	1	644	1481114	1480471	1	NA	NA	NA	NA	NA
sec	ORY:7	Y_Contig178	1	139	1480406	1480268	1	NA	NA	NA	NA	NA
sec	ORY:7	Y_Contig178	1	139	1791929	1791791	1	NA	NA	NA	NA	NA
sec	ORY:8	Y_Contig178	1	328	184740	184413	1	NA	NA	NA	NA	NA
sec	ORY:8	Y_Contig178	1	328	501915	493873	2	NA	NA	NA	NA	NA
sec	ORY:8	Y_Contig178	1	330	188309	187980	1	NA	NA	NA	NA	NA
sec	ORY:8	Y_Contig178	1	330	191971	191642	1	NA	NA	NA	NA	NA
sec	ORY:8	Y_Contig178	1	330	505482	505153	1	NA	NA	NA	NA	NA
sec	ORY:8	Y_scaffold2	1	330	68683	69011	1	NA	NA	NA	NA	NA
sec	Pp1-Y1:1	Y_Contig113	1	954	339819	340777	1	NA	NA	NA	NA	NA
sec	Pp1-Y2:1	Y_scaffold6	1	1286	264305	263049	1	NA	NA	NA	NA	NA
sec	Ppr-Y:1	Y_scaffold5	1	208	1229	1436	1	NA	NA	NA	NA	NA
sec	Ppr-Y:2	Y_scaffold5	44	284	24995	25235	1	NA	NA	NA	NA	NA
sec	Ppr-Y:3	Y_scaffold5	1	179	55621	55799	1	NA	NA	NA	NA	NA
sec	Ppr-Y:4	Y_scaffold5	1	577	111445	112021	1	NA	NA	NA	NA	NA
sec	Ppr-Y:5	Y_scaffold5	1	335	288475	288809	1	NA	NA	NA	NA	NA
sec	Ppr-Y:6	Y_scaffold5	1	127	342052	342178	1	NA	NA	NA	NA	NA
sec	Ppr-Y:6	Y_scaffold5	1	127	348606	348732	1	NA	NA	NA	NA	NA
sec	Ppr-Y:6	Y_scaffold5	1	127	389076	389202	1	NA	NA	NA	NA	NA
sec	PRY:1	Y_scaffold6	2026	2304	251031	251302	1	NA	NA	NA	NA	NA
sec	PRY:1	Y_scaffold6	2026	2304	254405	254676	1	NA	NA	NA	NA	NA
sec	PRY:1	Y_scaffold6	2026	2304	257776	258047	1	NA	NA	NA	NA	NA
sec	PRY:1	Y_scaffold6	2026	2304	261184	261455	1	NA	NA	NA	NA	NA
sec	PRY:1	Y_scaffold6	1	1935	215398	217332	1	NA	NA	NA	NA	NA
sec	PRY:1	Y_scaffold6	1	2475	165924	168407	1	NA	NA	NA	NA	NA
sec	PRY:1	Y_scaffold6	1	2475	184632	187060	2	NA	NA	NA	NA	NA
sec	PRY:1	Y_scaffold6	1	2475	187737	189995	3	NA	NA	NA	NA	NA
sec	PRY:1	Y_scaffold6	1	2475	202926	205308	2	NA	NA	NA	NA	NA
sec	PRY:1	Y_scaffold6	1	2475	205985	208368	2	NA	NA	NA	NA	NA
sec	PRY:2	Y_scaffold6	4	658	116658	117312	1	NA	NA	NA	NA	NA
sec	PRY:3	Y_scaffold6	1	609	10617	11225	1	NA	NA	NA	NA	NA
sec	wdy:1	Y_Contig158	1	610	25176	24567	1	NA	NA	NA	NA	NA
sec	wdy:1	Y_Contig160	1	610	24627	24053	1	NA	NA	NA	NA	NA
sec	wdy:1	Y_Contig161	1	610	6188	5579	1	NA	NA	NA	NA	NA
sec	wdy:1	Y_Contig161	1	610	23504	22895	1	NA	NA	NA	NA	NA
sec	wdy:1	Y_Contig171	1	610	26647	27028	2	NA	NA	NA	NA	NA
sec	wdy:1	Y_Contig171	1	610	30936	31545	1	NA	NA	NA	NA	NA
sec	wdy:1	Y_Contig38	1	610	8545	7936	1	NA	NA	NA	NA	NA
sec	wdy:1	Y_Contig38	1	610	21064	20455	1	NA	NA	NA	NA	NA
sec	wdy:1	Y_Contig38	1	610	40460	39853	1	NA	NA	NA	NA	NA
sec	wdy:1	Y_Contig38	1	610	51822	51213	1	NA	NA	NA	NA	NA
sec	wdy:1	Y_Contig45	1	610	2730	3338	1	NA	NA	NA	NA	NA
sec	wdy:1	Y_Contig45	1	610	39599	40208	1	NA	NA	NA	NA	NA
sec	wdy:1	Y_Contig45	1	610	45387	45995	1	NA	NA	NA	NA	NA
sec	wdy:1	Y_Contig45	1	610	51164	51773	1	NA	NA	NA	NA	NA
sec	wdy:1	Y_Contig54	1	610	10476	9872	1	NA	NA	NA	NA	NA
sec	wdy:2	Y_scaffold7	2	1081	249595	250674	1	NA	NA	NA	NA	NA
sec	wdy:3	Y_scaffold7	16	455	283873	283462	1	NA	NA	NA	NA	NA
sec	wdy:3	Y_scaffold7	1	455	299233	299687	1	NA	NA	NA	NA	NA
sec	wdy:4	Y_scaffold7	1	199	283401	283217	1	NA	NA	NA	NA	NA
sec	wdy:4	Y_scaffold7	1	199	299748	299946	1	NA	NA	NA	NA	NA
sec	wdy:5	Y_scaffold7	1	201	446638	446838	1	NA	NA	NA	NA	NA
sec	wdy:5	Y_scaffold7	1	201	481424	481624	1	NA	NA	NA	NA	NA
sec	wdy:6	Y_scaffold7	1	362	481686	482037	1	NA	NA	NA	NA	NA
sec	wdy:6	Y_scaffold7	1	848	446900	447797	2	NA	NA	NA	NA	NA
