# Supplementary material for: Unique structure and positive selection promote the rapid divergence of Drosophila Y chromosomes
Source: eLife. 2022 Jan 6;11:e75795. doi: 10.7554/eLife.75795 (PMC8794474; doi:10.7554/eLife.75795)
Supplement: Supplementary file 5. — We showed the length of each Y-linked exon in all conserved Y-linked genes based on BLAST results. If there are multiple copies of an exon, we choose the copy with a complete open reading frame and the highest expression level. [file elife-75795-supp5.xlsx]

## Sheet: Sheet2
Supplementary file 5. The intron length of all conserved Y-linked genes across species. We showed the length of each Y-linked exon in all conserved Y-linked genes based on BLAST results. If there are multiple copies of an exon, we choose the copy with a complete open reading frame and the highest expression level.
Gene		Intron length
	Exon (R6)	Dmel_R6	With a gap*	Dmel_new**	With a gap*	Dsim***	With a gap*	Dmau***	With a gap*	Dsech***	With a gap*
wdy	1
	2	137947	T	2163144	T	44802	F	219832	T	Unknown	T
	3	36709	T	223867	T	83837	F	269662	T	48558	F
	4	60	F	60	F	60	F	60	F	60	F
	5	36185	F	32113	F	143543	T	627067	T	146691	T
	6	61	F	61	F	61	F	61	F	61	F
PRY	1
	2	10208	T	29298	T	31493	F	79207	T	48611	F
	3	31977	F	31977	F	139809	F	64344	T	105432	T
CCY	1
	2	2059	T	20031	T	489699	F	550949	F	416946	T
	3	10671	T	172970	T	753261	T	706811	F	1402545	T
	4	50	T	0	F	0	F	0	F	0	F
	5	51	T	0	F	0	F	0	F	0	F
	6-1	100	T	0	F	0	F	0	F	0	F
	6-2	0	F	49	F	54	F	54	F	54	F
ARY	1
	2
	3	59	F	59	F	60	F	60	F	60	F
	4	51	F	51	F	51	F	50	F	50	F
	5	61	F	61	F	59	F	59	F	59	F
	6	56	F	56	F	57	F	57	F	57	F
ORY	1
	2	67	F	67	F	68	F	68	F	68	F
	3	2289	T	153761	T	276667	F	340669	F	332231	F
	4	54	F	54	F	53	F	53	F	53	F
	5	2789	T	123682	T	163092	F	182455	F	147675	F
	6	277	F	280	F	283	F	283	F	282	F
	7	53	F	53	F	64	F	64	F	64	F
	8	48321	T	263252	T	993322	F	345055	F	974785	F
PPr-Y	1
	2	4528	T	103878	F	146401	T	138683	F	23558	T
	3	1240	T	1888	T	273453	F	298984	F	30385	T
	4	9823	T	638953	T	127914	T	390479	F	45369	T
	5	150611	T	339040	F	146942	F	321148	F	176453	T
	6	80361	T	346610	T	91985	T	517708	T	53242	T
kl-5	1-1
	1-2	0	F	99013	F	19565	T	16423	F	61080	F
	2	3672	F	47275	F	75695	F	192823	F	206156	F
	3	52	F	52	F	51	F	52	F	52	F
	4	58	F	58	F	58	F	58	F	58	F
	5-1	53833	T	52867	T	1211	F	20300	F	27269	F
	5-2	0	F	12942	T	29770	F	206530	F	27168	F
	6	12151	T	29325	T	51525	T	35726	T	54752	F
	7	46	F	46	F	46	F	46	F	46	F
	8	56	F	56	F	57	F	57	F	57	F
	9	22948	T	90551	T	8962	T	8833	F	53966	T
	10	58	F	58	F	58	F	58	F	58	F
	11	51	F	51	F	51	F	51	F	51	F
	12	57	F	57	F	57	F	57	F	57	F
	13	56	F	56	F	52	F	53	F	53	F
	14	57	F	57	F	53	F	53	F	53	F
	15	57	F	57	F	57	F	57	F	58	F
	16	55	F	55	F	55	F	55	F	55	F
	17-1	8350	T	7702	T	41742	F	32214	F	33055	F
	17-2	0	F	54	F	54	F	54	F	54	F
kl-2	1
	2	23234	T	122101	T	466287	F	420517	F	125628	F
	3	39011	T	106859	T	40680	F	20884	F	104734	T
	4	54	F	54	F	54	F	54	F	54	F
	5	12244	T	43919	F	890	F	1814	F	862	F
	6	2747	T	19085	T	77642	F	432483	T	201535	F
	7	123	F	0	F	0	F	0	F	0	F
	8	56	F	56	F	72	F	65	F	65	F
	9	62	F	62	F	62	F	62	F	62	F
	10	53	F	53	F	53	F	53	F	53	F
	11	59	F	59	F	60	F	60	F	60	F
	12	57	F	57	F	62	F	62	F	62	F
kl-3	1
	2	13124	T	35005	T	5922	F	1598	F	5404	F
	3-1	56	F	56	F	57	F	57	F	57	F
	3-2	0	F	54	F	54	F	54	F	54	F
	4	4276	T	11707	T	58220	F	55573	F	64257	F
	5	60	F	60	F	64	F	64	F	64	F
	6	120259	T	135564	T	62051	T	207783	T	185525	T
	7	52	F	52	F	52	F	52	F	52	F
	8	10063	F	10063	F	30266	F	23608	F	13532	F
	9	53	F	53	F	53	F	53	F	53	F
	10	63	F	63	F	56	F	57	F	57	F
	11	7069	T	41996	T	21622	F	63763	T	78072	T
	12	39582	T	191749	T	27959	T	27859	T	62453	F
	13	274	F	274	F	273	F	273	F	61393	F
	14	16620	T	72224	T	61450	T	41662	T	174099	F
	15	55	F	55	F	55	F	55	F	55	F
	16	1297	T	16175	T	77209	F	140750	T	177478	F
* There is a gap in the intron sequence, so the length of intron is the minimal length
** Data from Chang and Larracuente 2019
*** This study
