# Supplementary material for: Unique structure and positive selection promote the rapid divergence of Drosophila Y chromosomes
Source: eLife. 2022 Jan 6;11:e75795. doi: 10.7554/eLife.75795 (PMC8794474; doi:10.7554/eLife.75795)
Supplement: Supplementary file 6. — We used kseek to measure the relative abundance of simple repeats in our Illumina reads. We also used TRF finder to calculate repeat contents in our assemblies. We compared the two results and picked probes for our FISH experiments. [file elife-75795-supp6.xlsx]

## Sheet: kseek
Supplementary file 6. The abundance of simple repeats in Illumina reads from male flies estimated with kseek and from our genome assemblies. We used kseek to measure the relative abundance of simple repeats in our Illumina reads. We also used TRF finder to calculate repeat contents in our assemblies. We compared the two results and picked probes for our FISH experiments.
Satellite repeat	Dmau_R1.rep.total	Dmau_R2.rep.total	Dsech_R1.rep.total	Dsech_R2.rep.total	Dsim_R1.rep.total	Dsim_R2.rep.total	Dmau	Dsec	Dsim	flanking region (<50bp)
AACATGTTCG/CGAACATGTT	321298	227508	321095	240875	204588	147423	548806	561970	352011
AACAGAACATGTTCG/CGAACATGTTCTGTT	3116369	2646105	3887622	3364335	1874541	1598904	5762474	7251957	3473445
AAAATG/CATTTT	16448	16994	54	33	10	14	33442	87	24	between Gypsy-1_DSim-LTR and Gypsy-1_DSim-I
AAACAAT/ATTGTTT	393	339	308	377	768444	801786	732	685	1570230
AAACAT/ATGTTT	16521	16089	34	19	33	19	32610	53	52	between 2 DM412B_LTR, 3 TRs in DM412B, From AAACAAT
AAATGT/ACATTT	3593	3713	192951	182268	3237	3497	7306	375219	6734	between Gypsy-20_DAn-I and DNAREP1_DSim
AATAG/CTATT	2822508	2884135	2785927	2803100	7236126	7256340	5706643	5589027	14492466
ACAGATAGT/ACTATCTGT	205059	200333	351	342	238	198	405392	693	436	between Copia_I and Gypsy-4_DSim-I, unknown
AGATG/CATCT	0	0	0	0	5242	4279	0	0	9521	DMCR1A
AATCTC/GAGATT	8049	7382	1037	1253	19	0	15431	2290	19
AACAG/CTGTT	1246168	1080989	2870864	2578822	1471016	1262705	2327157	5449686	2733721
AAGAC/GTCTT	89	39	0	0	50	62	128	0	112
AATAT/ATATT	702727	657141	2705638	2458061	1881119	1770203	1359868	5163699	3651322
A/T	2031291	1514561	3349692	3038951	2362130	1697899	3545852	6388643	4060029
AATAGT/ACTATT	1677748	1666681	2496	2969	435095	430755	3344429	5465	865850
AATACC/GGTATT	516792	478279	706	515	621	532	995071	1221	1153
AAT/ATT	281237	283044	731298	720783	265570	261621	564281	1452081	527191
C/G	62725	388278	64894	382264	68604	409996	451003	447158	478600
AACAATT/AATTGTT	200318	201061	36547	37154	26752	26581	401379	73701	53333
AT/AT	208883	177595	305816	285007	296960	257543	386478	590823	554503
ACCGAGTACGGG/CCCGTACTCGGT	151801	113118	36869	17659	183932	125948	264919	54528	309880
AGAT/ATCT	120929	120461	4736981	4744387	494090	490408	241390	9481368	984498
AATACT/AGTATT	116029	115873	202151	199159	365	504	231902	401310	869
AATATAT/ATATATT	79352	76124	55472	50593	92793	90659	155476	106065	183452
AAAACTT/AAGTTTT	47132	47321	14834	15112	3575	4001	94453	29946	7576
AATGAT/ATCATT	40952	40004	50	39	47	39	80956	89	86
AAGAG/CTCTT	29890	33689	5267	5946	319803	323588	63579	11213	643391
AGC/GCT	25943	11869	24591	12883	23737	11642	37812	37474	35379
ACAGAT/ATCTGT	16294	15251	4490	4483	26931	25261	31545	8973	52192
AATTAC/GTAATT	14943	14524	19	0	14	14	29467	19	28
AAACAGAACAGAACAT/ATGTTCTGTTCTGTTT	13430	12048	40	11	17	6	25478	51	23
AACTTAAT/ATTAAGTT	10485	10919	42426	42235	20545	20315	21404	84661	40860
AAACTTT/AAAGTTT	9136	8865	23	0	0	0	18001	23	0
AAAGTAAGT/ACTTACTTT	7765	7583	2957	3725	9001	8806	15348	6682	17807
AACAATC/GATTGTT	7321	6749	84	45	200383	184552	14070	129	384935
AACACGTTCGAACAG/CTGTTCGAACGTGTT	7438	5646	1160	1066	549	533	13084	2226	1082
AATAGAATTG/CAATTCTATT	5829	5722	774	784	1659065	1661553	11551	1558	3320618
AAC/GTT	6256	5171	5339	4299	9207	7085	11427	9638	16292
AAAT/ATTT	4987	5014	30	39	532	597	10001	69	1129
AACACGTTCTGTTCG/CGAACAGAACGTGTT	5574	4238	83	27	8	0	9812	110	8
AGATATAT/ATATATCT	5281	4334	36438	32528	41930	37776	9615	68966	79706
AACAGAACATGTTCGAATAG/CTATTCGAACATGTTCTGTT	5230	3820	3270	2607	9	0	9050	5877	9
AACAGAACATAATCG/CGATTATGTTCTGTT	4610	4322	371	318	8138	6689	8932	689	14827
AATAATT/AATTATT	4254	3773	0	17	0	0	8027	17	0
ACTGGG/CCCAGT	5159	2531	1973	965	875	314	7690	2938	1189
AAACATGTTCTGTTC/GAACAGAACATGTTT	4265	3281	11451	9458	1381	1215	7546	20909	2596
AAATT/AATTT	3733	3568	11023	11178	1856	1614	7301	22201	3470
AAAATAT/ATATTTT	3587	3510	9170	8659	4828	5098	7097	17829	9926
ACT/AGT	3975	2974	3911	3272	3468	3826	6949	7183	7294
AG/CT	3498	2482	7475	6058	7906	5016	5980	13533	12922
AAACAAC/GTTGTTT	2766	2777	597	465	698360	618465	5543	1062	1316825
AATAATAT/ATATTATT	3092	2383	56785	58072	4054	3915	5475	114857	7969
AC/GT	3400	1939	7759	4045	6505	3402	5339	11804	9907
AACTATCT/AGATAGTT	2271	2729	0	0	0	0	5000	0	0
AATGGT/ACCATT	2188	2242	0	0	0	0	4430	0	0
AACATGTTCGTACAG/CTGTACGAACATGTT	2493	1744	69545	58367	65	44	4237	127912	109
AAAACATGTTCAAAC/GTTTGAACATGTTTT	2219	1897	4	0	8	4	4116	4	12
ACGGAGTACGGG/CCCGTACTCCGT	2715	1275	0	0	3656	1853	3990	0	5509
AACAGAACAGAACATGTTCG/CGAACATGTTCTGTTCTGTT	2357	1550	11176	7818	3236	1988	3907	18994	5224
AACTAT/ATAGTT	1891	1767	0	0	0	13	3658	0	13
AATAGTAATATAGT/ACTATATTACTATT	1908	1621	0	0	0	0	3529	0	0
AAAGATAG/CTATCTTT	1864	1629	0	0	0	7	3493	0	7
AATTC/GAATT	1761	1492	524754	498335	179036	164809	3253	1023089	343845
AATAATAATAATAT/ATATTATTATTATT	1708	1460	248	250	358	290	3168	498	648
AATAC/GTATT	1653	1415	5400	5953	3412	3906	3068	11353	7318
AAACAGAACATGTTC/GAACATGTTCTGTTT	1781	1199	12159	10396	479	443	2980	22555	922
AAGAGAAGGG/CCCTTCTCTT	1422	1364	0	0	0	0	2786	0	0
AAAATTAC/GTAATTTT	1398	1242	953	989	4507	4996	2640	1942	9503
AATATCTATCTGT/ACAGATAGATATT	1264	1241	3644	3846	4848	4805	2505	7490	9653
AACAGAACGG/CCGTTCTGTT	1573	924	61	50	0	0	2497	111	0
AACATGTTCGAACCG/CGGTTCGAACATGTT	1258	1009	1898	1510	2884	2305	2267	3408	5189
AACAGAACCAG/CTGGTTCTGTT	1405	856	386	217	3076	2046	2261	603	5122
AACAGT/ACTGTT	1171	1003	0	0	0	0	2174	0	0
AACATGTTCGAATAG/CTATTCGAACATGTT	1098	984	476	421	213	148	2082	897	361
ATC/GAT	1120	812	824	399	0	0	1932	1223	0
ACATACGG/CCGTATGT	1172	745	276	131	1071	687	1917	407	1758
ACCGAGTACCGG/CCGGTACTCGGT	1258	640	0	0	890	371	1898	0	1261
AAACAGTTAGTG/CACTAACTGTTT	979	895	2285	1879	672	454	1874	4164	1126
AAGTACGGGACC/GGTCCCGTACTT	1193	656	20	5	342	267	1849	25	609
AATCGT/ACGATT	947	816	0	0	0	0	1763	0	0
AAATAC/GTATTT	1014	742	104956	104174	103	93	1756	209130	196
AACAGAACATGTTCC/GGAACATGTTCTGTT	977	681	7735	6511	4	4	1658	14246	8
AACAAGTTCGAACAG/CTGTTCGAACTTGTT	827	698	112	27	441	393	1525	139	834
AAAAGAACATGTTCG/CGAACATGTTCTTTT	894	593	2483	2038	4	4	1487	4521	8
AACAGAACCTGTTCG/CGAACAGGTTCTGTT	797	615	0	8	0	0	1412	8	0
ACCGAGTACGCG/CGCGTACTCGGT	960	348	0	0	835	397	1308	0	1232
AAACAGAACATGTTT/AAACATGTTCTGTTT	649	617	265	176	0	0	1266	441	0
AATATG/CATATT	594	649	0	0	0	0	1243	0	0
AACAGAATAG/CTATTCTGTT	626	580	9503	8654	21386	20815	1206	18157	42201
AATGTCATGT/ACATGACATT	687	495	590	534	537	286	1182	1124	823
AACAGATCATGTTCG/CGAACATGATCTGTT	640	495	3629	2826	444	369	1135	6455	813
AGATAGATAGATATAT/ATATATCTATCTATCT	558	532	830	753	0	0	1090	1583	0
AAG/CTT	670	387	461	357	4613	2525	1057	818	7138
AAATATAATC/GATTATATTT	554	472	159	162	18	18	1026	321	36
AGG/CCT	630	394	502	221	681	412	1024	723	1093
AATAGAGTAATAGT/ACTATTACTCTATT	501	464	0	0	0	0	965	0	0
AACAGAACATGGTCG/CGACCATGTTCTGTT	596	368	105	76	121	120	964	181	241
AAAATATAT/ATATATTTT	442	433	920	897	894	986	875	1817	1880
AATCGGGAGTCTG/CAGACTCCCGATT	520	335	0	0	68	24	855	0	92
AACAGAATATCTTCG/CGAAGATATTCTGTT	460	356	0	0	332	260	816	0	592
AACAGAACATGATCG/CGATCATGTTCTGTT	481	332	3548	2447	13	42	813	5995	55
ACCAGTACGGG/CCCGTACTGGT	569	200	7823	3898	183	152	769	11721	335
AAATGTATATG/CATATACATTT	456	294	6	0	0	0	750	6	0
AACAGAACATGTAAG/CTTACATGTTCTGTT	483	217	0	0	0	0	700	0	0
AACACAACATGTTCG/CGAACATGTTGTGTT	382	315	8	8	1996	1652	697	16	3648
AAAACAGAACATGTT/AACATGTTCTGTTTT	363	298	0	0	98	108	661	0	206
AAATGAACAAGTTCG/CGAACTTGTTCATTT	361	298	0	0	4	0	659	0	4
AATAGTAATAGTAATATAGT/ACTATATTACTATTACTATT	315	311	0	0	0	0	626	0	0
AAATAT/ATATTT	340	275	0	0	11	11	615	0	22
AATCCATCATC/GATGATGGATT	298	312	0	0	0	0	610	0	0
AACATGTTCGAAGAG/CTCTTCGAACATGTT	317	258	157	152	877	608	575	309	1485
AATAGTAATTGT/ACAATTACTATT	246	326	0	0	0	0	572	0	0
AACAGAACATGTGCG/CGCACATGTTCTGTT	354	206	96	56	0	0	560	152	0
AAAATGTTCTGTTCG/CGAACAGAACATTTT	304	233	236	256	0	4	537	492	4
AAGTAATGTAT/ATACATTACTT	288	241	0	0	1302	1088	529	0	2390
AACATGTTCGACAAG/CTTGTCGAACATGTT	248	280	32	20	0	0	528	52	0
AATAATAATAATAATCGT/ACGATTATTATTATTATT	257	261	766	745	0	4	518	1511	4
AATATAATATAT/ATATATTATATT	223	282	3166	3320	514	617	505	6486	1131
ACC/GGT	374	130	303	18	132	42	504	321	174
AATGTCCGT/ACGGACATT	287	209	0	0	0	0	496	0	0
AAAATTTACATTT/AAATGTAAATTTT	190	301	106	73	161	151	491	179	312
AAAGAAGAAGAGAAGAGG/CCTCTTCTCTTCTTCTTT	256	226	120	94	0	0	482	214	0
AGAGC/GCTCT	319	163	0	0	0	0	482	0	0
ACTG/CAGT	338	133	1645	1125	169	83	471	2770	252
AAAACATGTTCGAAC/GTTCGAACATGTTTT	256	214	3754	3189	272	182	470	6943	454
AAGTATATACATAT/ATATGTATATACTT	212	250	229	153	133	164	462	382	297
AATATAATATAATATAT/ATATATTATATTATATT	171	290	2591	2289	370	401	461	4880	771
AACAC/GTGTT	246	206	183	121	21	18	452	304	39
ACAGAG/CTCTGT	243	208	27	9	0	0	451	36	0
ACTCCT/AGGAGT	253	183	0	0	45	9	436	0	54
AAGAGAATAG/CTATTCTCTT	195	235	198	164	417092	424868	430	362	841960
AGATAT/ATATCT	171	257	0	0	70	48	428	0	118
AACAGTAATAGT/ACTATTACTGTT	221	200	0	0	0	0	421	0	0
AACAGTAACAGTAATAGAGT/ACTCTATTACTGTTACTGTT	186	213	0	0	0	0	399	0	0
AATCTATCTATATATC/GATATATAGATAGATT	236	143	0	5	0	0	379	5	0
AATATATGTATATATAT/ATATATATACATATATT	167	204	73	72	194	175	371	145	369
AAAAC/GTTTT	176	190	276614	240875	107	261	366	517489	368
AAGTATACAC/GTGTATACTT	228	138	0	0	0	0	366	0	0
AAACACGTTCTGTTC/GAACAGAACGTGTTT	196	160	0	0	0	0	356	0	0
AACATGTTCGAGCAG/CTGCTCGAACATGTT	214	130	1158	915	348	345	344	2073	693
AACTATTACTAT/ATAGTAATAGTT	171	171	0	0	0	0	342	0	0
AATAATAATACT/AGTATTATTATT	176	162	0	0	0	0	338	0	0
AAACTAT/ATAGTTT	220	112	0	0	0	0	332	0	0
AATAGTACTAGT/ACTAGTACTATT	158	174	0	0	0	0	332	0	0
AACATAATCGAATAG/CTATTCGATTATGTT	200	128	4	0	0	0	328	4	0
ACTAGT/ACTAGT	214	92	0	0	0	0	306	0	0
AACAGC/GCTGTT	186	111	36	9	0	9	297	45	9
AACACGTTCG/CGAACGTGTT	192	102	30	6	0	0	294	36	0
ACAGATACT/AGTATCTGT	166	128	0	0	0	0	294	0	0
ATATC/GATAT	143	144	0	11	0	0	287	11	0
AACATAGAAT/ATTCTATGTT	128	158	53	36	54	46	286	89	100
AAATATATT/AATATATTT	132	138	0	0	0	0	270	0	0
AACGGGACAGAG/CTCTGTCCCGTT	173	95	5	0	0	0	268	5	0
AACTGGACCATGTCCTAC/GTAGGACATGGTCCAGTT	155	103	0	0	0	0	258	0	0
AAGATGATCAAGGTGATC/GATCACCTTGATCATCTT	127	130	0	0	244	152	257	0	396
AAACGGAGGATCCGG/CCGGATCCTCCGTTT	158	95	0	0	0	0	253	0	0
AATAGAGTAATAGTAATAGT/ACTATTACTATTACTCTATT	130	114	0	0	0	0	244	0	0
AATATTATAT/ATATAATATT	107	133	0	0	12	25	240	0	37
AAAGAAGAGAAGAGG/CCTCTTCTCTTCTTT	141	97	0	0	0	0	238	0	0
AATAGAATTAGAATATAG/CTATATTCTAATTCTATT	121	112	90	91	0	0	233	181	0
AATAATAGT/ACTATTATT	109	120	0	0	0	0	229	0	0
AAATATAAATATAT/ATATATTTATATTT	127	101	0	0	0	0	228	0	0
AAGAGT/ACTCTT	118	106	0	0	0	0	224	0	0
AATAGTAGTAGT/ACTACTACTATT	92	131	0	0	0	0	223	0	0
AAACACAATTAGCTAGT/ACTAGCTAATTGTGTTT	132	87	0	0	0	0	219	0	0
AATGT/ACATT	100	114	18206	17490	16745	15914	214	35696	32659
AACAATAT/ATATTGTT	119	95	0	0	0	0	214	0	0
ACATACGGACTG/CAGTCCGTATGT	150	60	0	0	0	0	210	0	0
AAAAAAAGCAAG/CTTGCTTTTTTT	85	119	0	0	0	0	204	0	0
AATAGC/GCTATT	112	83	0	0	0	0	195	0	0
AATACAATAG/CTATTGTATT	102	91	0	0	2820	2953	193	0	5773
AAATAATAATAAT/ATTATTATTATTT	115	78	0	4	0	0	193	4	0
AATATAGT/ACTATATT	65	128	0	0	0	0	193	0	0
AACAGAACATGTTAG/CTAACATGTTCTGTT	105	81	4	0	1101	911	186	4	2012
AACAGAACATGTACG/CGTACATGTTCTGTT	108	77	0	4	8	0	185	4	8
ACAT/ATGT	126	55	237	231	156	130	181	468	286
AACGGAGTACGG/CCGTACTCCGTT	125	55	0	0	0	0	180	0	0
ACCGACTACGGG/CCCGTAGTCGGT	119	58	0	0	15	5	177	0	20
AACAGAACAGAACGG/CCGTTCTGTTCTGTT	94	82	28	0	0	0	176	28	0
AAGTATGGGACC/GGTCCCATACTT	87	87	0	0	159	101	174	0	260
AACATGTTCGCACAG/CTGTGCGAACATGTT	79	95	0	0	0	0	174	0	0
AAAATGTTCGAACAG/CTGTTCGAACATTTT	92	74	425	328	0	0	166	753	0
AATAGTAATTGTAATTGT/ACAATTACAATTACTATT	73	93	0	0	0	0	166	0	0
AACC/GGTT	135	29	164	54	0	0	164	218	0
AACCTACCAAGGAGC/GCTCCTTGGTAGGTT	86	73	197	124	82	36	159	321	118
AAATATCTACTCGTC/GACGAGTAGATATTT	63	96	0	0	0	0	159	0	0
AATAGTAATGGT/ACCATTACTATT	102	56	0	0	0	0	158	0	0
ACATCC/GGATGT	121	31	92	47	27	18	152	139	45
AACAGAACATATTCG/CGAATATGTTCTGTT	76	69	160	193	148	140	145	353	288
AAGAGGGAGCGGAGAGCGT/ACGCTCTCCGCTCCCTCTT	81	61	68	21	18	21	142	89	39
AAAATGTTCTCTTCG/CGAAGAGAACATTTT	80	56	170	127	0	0	136	297	0
AATGTATATGTATATAT/ATATATACATATACATT	60	69	0	0	0	0	129	0	0
ACATAT/ATATGT	81	45	3337	2959	1086	1183	126	6296	2269
AAATAAC/GTTATTT	73	52	137	92	192979	189280	125	229	382259
AAACAGAACAT/ATGTTCTGTTT	103	22	0	0	0	0	125	0	0
AAGATTCATGATGGGTCTGT/ACAGACCCATCATGAATCTT	78	45	0	0	0	0	123	0	0
ACAGATACTACAGATAGT/ACTATCTGTAGTATCTGT	64	58	0	0	0	0	122	0	0
AATGG/CCATT	69	51	28	53	11268	12540	120	81	23808
AAAAGAATAG/CTATTCTTTT	63	57	177648	193188	165	152	120	370836	317
AAATAAT/ATTATTT	72	48	216	192	0	0	120	408	0
AAATTCGACAGAACAGAAC/GTTCTGTTCTGTCGAATTT	66	54	0	0	0	0	120	0	0
AAGTACGGGACG/CGTCCCGTACTT	75	40	0	0	0	0	115	0	0
ACAGACATACGG/CCGTATGTCTGT	75	40	0	0	0	0	115	0	0
AAATAG/CTATTT	52	62	19	102	91697	93808	114	121	185505
AACAGAAGAG/CTCTTCTGTT	62	47	1749	1459	0	0	109	3208	0
AAATAATAC/GTATTATTT	51	53	1384	1632	430	427	104	3016	857
ACCGAGTACGGC/GCCGTACTCGGT	98	6	0	0	232	112	104	0	344
AACATAACATGTTCG/CGAACATGTTATGTT	40	64	8	16	165	77	104	24	242
AACAGAACATGGTAG/CTACCATGTTCTGTT	48	52	0	0	0	0	100	0	0
ACGCTCTAGGCTCT/AGAGCCTAGAGCGT	64	36	0	0	0	0	100	0	0
ATATATATC/GATATATAT	66	34	0	0	0	0	100	0	0
AATAGGAATAGT/ACTATTCCTATT	48	51	0	0	0	0	99	0	0
AATCGGTCCCGT/ACGGGACCGATT	76	22	0	0	6	0	98	0	6
AACAGAATATGTTCG/CGAACATATTCTGTT	64	32	2689	2306	4	0	96	4995	4
AACATGTTCGACCAG/CTGGTCGAACATGTT	56	40	0	0	0	0	96	0	0
AATAGTATCAGT/ACTGATACTATT	53	42	0	0	0	0	95	0	0
AATCAT/ATGATT	83	11	0	0	0	0	94	0	0
AATAATAGTAATAGT/ACTATTACTATTATT	56	37	0	0	0	0	93	0	0
AAAGCCACCTAAGGAGCC/GGCTCCTTAGGTGGCTTT	56	35	145	53	20	22	91	198	42
AATAATAATAT/ATATTATTATT	65	24	390	295	36	17	89	685	53
AACCTCACCACGAGGAGC/GCTCCTCGTGGTGAGGTT	63	25	0	0	0	0	88	0	0
AATAGTATCAGTATCAGT/ACTGATACTGATACTATT	62	25	0	0	0	0	87	0	0
AAACAACAATCAAC/GTTGATTGTTGTTT	51	34	0	0	1744	1333	85	0	3077
AAAGAAGAGGAAAGAAGG/CCTTCTTTCCTCTTCTTT	57	27	0	0	0	0	84	0	0
AACAGAACGAATTCG/CGAATTCGTTCTGTT	44	40	0	0	0	0	84	0	0
ACACTACGG/CCGTAGTGT	58	26	0	0	0	0	84	0	0
AAAACAAC/GTTGTTTT	34	46	91	99	52898	49910	80	190	102808
AAAAT/ATTTT	43	37	59508	65185	750	1103	80	124693	1853
AACAGTGGGACC/GGTCCCACTGTT	70	10	0	0	128	81	80	0	209
AATAGCT/AGCTATT	45	35	0	0	0	0	80	0	0
AACGGACAGCCG/CGGCTGTCCGTT	73	5	0	0	165	65	78	0	230
AAACAGAACAGAACAG/CTGTTCTGTTCTGTTT	60	17	0	0	0	0	77	0	0
AACAGGAGAAGAAGG/CCTTCTTCTCCTGTT	38	36	79	55	48	36	74	134	84
AACAT/ATGTT	23	49	644	549	1439	918	72	1193	2357
AACAGAACATAACATGTTCG/CGAACATGTTATGTTCTGTT	48	24	66	48	0	0	72	114	0
AAATATAT/ATATATTT	42	30	0	0	0	0	72	0	0
AACATGTTCGATCAG/CTGATCGAACATGTT	48	24	0	0	0	0	72	0	0
CCG/CGG	35	35	93	17	69	0	70	110	69
AACAGCAGCAACATCAGC/GCTGATGTTGCTGCTGTT	48	21	0	0	39	6	69	0	45
AATAGAATAGAATAGAATAT/ATATTCTATTCTATTCTATT	47	22	101	84	0	0	69	185	0
AATAGTAATAGTAGTAGT/ACTACTACTATTACTATT	43	26	0	0	0	0	69	0	0
ACTGAT/ATCAGT	20	49	0	0	0	0	69	0	0
AATAATAATAATAATAT/ATATTATTATTATTATT	39	27	9	6	0	0	66	15	0
AGATAGATAGATAGATATAT/ATATATCTATCTATCTATCT	43	22	772	661	3	0	65	1433	3
AAAGTATCTGAAGG/CCTTCAGATACTTT	41	24	40	8	0	0	65	48	0
AATACAATAGAATAG/CTATTCTATTGTATT	54	9	0	0	242	313	63	0	555
AGATAGATATAT/ATATATCTATCT	39	24	1563	1395	5	0	63	2958	5
AAGAGGGAGTGGAGAGCGT/ACGCTCTCCACTCCCTCTT	33	30	0	0	0	0	63	0	0
AATATGATAT/ATATCATATT	49	12	275	165	0	0	61	440	0
AAAAAAATTATTTTAAAC/GTTTAAAATAATTTTTTT	32	28	0	0	0	0	60	0	0
ACCTGAGATGGAGCC/GGCTCCATCTCAGGT	48	12	0	0	0	0	60	0	0
AGCCTG/CAGGCT	58	0	0	0	0	0	58	0	0
AAAATGTTCTGTTCTGTTCG/CGAACAGAACAGAACATTTT	33	24	0	0	0	0	57	0	0
AACATCCACAGCAGCAGC/GCTGCTGCTGTGGATGTT	42	15	0	0	0	0	57	0	0
ACATATAT/ATATATGT	28	28	3903	3676	5738	5444	56	7579	11182
AAAGAAGAGG/CCTCTTCTTT	32	24	0	0	0	0	56	0	0
ACGGAGTACGTG/CACGTACTCCGT	25	31	0	0	0	0	56	0	0
ACTGATGG/CCATCAGT	35	21	0	0	0	0	56	0	0
AACAGAGCATGTTCG/CGAACATGCTCTGTT	36	16	0	0	0	4	52	0	4
AAGAGGAGGAGGAGAAGG/CCTTCTCCTCCTCCTCTT	45	6	0	0	0	0	51	0	0
AATAGTAATAGTAATTGT/ACAATTACTATTACTATT	30	21	0	0	0	0	51	0	0
AAAAG/CTTTT	15	35	11058	5218	29	107	50	16276	136
AAACAC/GTGTTT	17	33	0	0	0	0	50	0	0
ACGGGGCCGAGT/ACTCGGCCCCGT	33	15	0	0	77	20	48	0	97
AAGGACATGGAC/GTCCATGTCCTT	37	10	82	28	0	0	47	110	0
AATAGAATGG/CCATTCTATT	27	19	0	9	36891	37804	46	9	74695
AATACGGGACCG/CGGTCCCGTATT	25	20	0	0	0	0	45	0	0
AAGGG/CCCTT	27	14	0	0	25	25	41	0	50
AATATAATATGATAT/ATATCATATTATATT	16	24	0	4	0	0	40	4	0
AACGGGACCGAG/CTCGGTCCCGTT	35	5	0	0	0	0	40	0	0
AATAGAGT/ACTCTATT	17	23	0	0	0	0	40	0	0
AATAGTAATATT/AATATTACTATT	37	0	0	0	0	0	37	0	0
AATATAATATAATATAATGT/ACATTATATTATATTATATT	24	12	68	36	12	11	36	104	23
ACACCACCC/GGGTGGTGT	36	0	6	0	0	0	36	6	0
AAATTTAAT/ATTAAATTT	18	18	0	0	0	0	36	0	0
AACAACAACCACAGAACC/GGTTCTGTGGTTGTTGTT	15	21	0	0	0	0	36	0	0
AAGAT/ATCTT	16	19	5003	5062	21	24	35	10065	45
AATAGTAATAGTAATAGTAT/ATACTATTACTATTACTATT	14	21	0	0	0	0	35	0	0
AACAGAACCG/CGGTTCTGTT	11	23	9230	6651	18	16	34	15881	34
AATAGAATCG/CGATTCTATT	22	10	9	0	13473	12309	32	9	25782
AATAGAATAGAATAT/ATATTCTATTCTATT	16	16	24	4	44	27	32	28	71
AACAACAACCAG/CTGGTTGTTGTT	21	10	42	38	5	6	31	80	11
AACAAGTTCG/CGAACTTGTT	0	31	0	0	0	0	31	0	0
AATAATAATAATAATAATAT/ATATTATTATTATTATTATT	15	16	0	0	0	0	31	0	0
AAAAAATTATTTTAAAC/GTTTAAAATAATTTTTT	12	18	0	0	0	0	30	0	0
AAAAAAT/ATTTTTT	0	29	8	8	17	0	29	16	17
AATAGTAATAGTACTAGT/ACTAGTACTATTACTATT	19	10	0	0	0	0	29	0	0
AAAATAGAATAGGAT/ATCCTATTCTATTTT	12	16	0	0	0	0	28	0	0
AACACGTTCTGTTAG/CTAACAGAACGTGTT	8	20	0	0	0	0	28	0	0
AATAATAATATAATAT/ATATTATATTATTATT	12	16	0	0	0	0	28	0	0
AACCAC/GTGGTT	9	18	0	0	0	0	27	0	0
ACAGCAGCTAGCTCCACC/GGTGGAGCTAGCTGCTGT	24	3	0	0	0	0	27	0	0
ACGGAT/ATCCGT	0	27	0	0	0	0	27	0	0
AACAGCAGC/GCTGCTGTT	26	0	12	0	0	0	26	12	0
AATAGTGATAGT/ACTATCACTATT	12	14	0	0	0	0	26	0	0
AACATCCAGGAC/GTCCTGGATGTT	25	0	39	35	20	10	25	74	30
AATATAG/CTATATT	16	8	0	0	176	68	24	0	244
AATATATAATATATAT/ATATATATTATATATT	14	10	72	29	65	51	24	101	116
AACCG/CGGTT	24	0	38	12	56	52	24	50	108
AAACAGAACGTGTTC/GAACACGTTCTGTTT	16	8	0	0	0	0	24	0	0
AAAGTAAATTAAATT/AATTTAATTTACTTT	16	8	0	0	0	0	24	0	0
AACAACATGTTCGAATAG/CTATTCGAACATGTTGTT	16	8	0	0	0	0	24	0	0
AACACCAACAGCAGC/GCTGCTGTTGGTGTT	8	16	0	0	0	0	24	0	0
AAGGTCCACCAGGGG/CCCCTGGTGGACCTT	9	14	0	0	16	8	23	0	24
AAAAATAATAAT/ATTATTATTTTT	0	22	0	0	0	0	22	0	0
AATAGTAATAGTAATAGTGT/ACACTATTACTATTACTATT	22	0	0	0	0	0	22	0	0
ACCAT/ATGGT	22	0	0	0	0	0	22	0	0
AAGAGAG/CTCTCTT	0	21	0	0	10530	16415	21	0	26945
AATCG/CGATT	20	0	0	31	9257	6531	20	31	15788
AACATGTTCCGTTCG/CGAACGGAACATGTT	12	8	8899	6781	1895	1489	20	15680	3384
AAAATGTAT/ATACATTTT	8	12	2061	2794	473	460	20	4855	933
AACAGTAATAGTTATAGT/ACTATAACTATTACTGTT	10	10	0	0	0	0	20	0	0
AATTAG/CTAATT	10	10	0	0	0	0	20	0	0
AGATATGAGATG/CATCTCATATCT	9	10	7	0	6270	5554	19	7	11824
AATAGAATAT/ATATTCTATT	6	13	1787	1831	887	1141	19	3618	2028
AACAACCAG/CTGGTTGTT	13	6	50	13	0	0	19	63	0
AAAG/CTTT	0	19	0	0	0	0	19	0	0
AATAGTAATAGTAGT/ACTACTATTACTATT	19	0	0	0	0	0	19	0	0
ACACG/CGTGT	19	0	0	0	0	0	19	0	0
AAAAATAAT/ATTATTTTT	12	6	23	12	0	0	18	35	0
AAGACATGAC/GTCATGTCTT	11	7	0	0	0	0	18	0	0
AAGT/ACTT	18	0	0	0	0	0	18	0	0
AGGCGG/CCGCCT	18	0	0	0	0	0	18	0	0
AATATATAT/ATATATATT	17	0	183	151	165	127	17	334	292
AACGGACAGGCG/CGCCTGTCCGTT	11	6	0	0	0	6	17	0	6
AATAATAATAGTAATAGT/ACTATTACTATTATTATT	17	0	0	0	0	3	17	0	3
AACAGGACATGTTCG/CGAACATGTCCTGTT	8	8	0	0	4	8	16	0	12
AAGACTAGAC/GTCTAGTCTT	8	8	0	0	0	0	16	0	0
ACGAG/CTCGT	15	0	2408	1555	13	0	15	3963	13
AAAGACACCTAAGGAGCC/GGCTCCTTAGGTGTCTTT	12	3	0	0	9	3	15	0	12
AAATATATATAT/ATATATATATTT	10	5	0	0	5	5	15	0	10
AAATAGAT/ATCTATTT	0	15	4022	4464	0	0	15	8486	0
AATAGTAATAGTAT/ATACTATTACTATT	0	15	0	0	0	0	15	0	0
AATGTGGTGGGC/GCCCACCACATT	15	0	0	0	0	0	15	0	0
AATATATATAT/ATATATATATT	7	7	40	0	96	86	14	40	182
AATAGTAGT/ACTACTATT	7	7	0	0	0	0	14	0	0
AAACATGTTC/GAACATGTTT	0	13	6	0	336	186	13	6	522
ATCC/GGAT	0	13	91	91	91	13	13	182	104
ACAGCGGCAGCGACG/CGTCGCTGCCGCTGT	13	0	155	58	24	0	13	213	24
AAATTATATTATATT/AATATAATATAATTT	0	13	4	14	0	0	13	18	0
AAAATAGAATAGAATAGAAT/ATTCTATTCTATTCTATTTT	9	3	0	0	120	115	12	0	235
AACCAG/CTGGTT	0	12	3105	2310	41	32	12	5415	73
AACAGAACATGTTCT/AGAACATGTTCTGTT	8	4	4	0	0	8	12	4	8
AACACC/GGTGTT	12	0	2750	1763	0	0	12	4513	0
AACCACAACGACTAC/GTAGTCGTTGTGGTT	4	8	183	95	0	0	12	278	0
AAATAATAT/ATATTATTT	6	6	0	0	0	0	12	0	0
AACAGTAACAGTAATAGT/ACTATTACTGTTACTGTT	5	7	0	0	0	0	12	0	0
AACTATTACTATTACTAT/ATAGTAATAGTAATAGTT	6	6	0	0	0	0	12	0	0
AATAATAATAATCGT/ACGATTATTATTATT	0	12	0	0	0	0	12	0	0
AAATGTATG/CATACATTT	0	11	23	18	19823	19559	11	41	39382
AATAGAC/GTCTATT	0	11	0	0	17	20	11	0	37
AAAAAG/CTTTTT	11	0	0	0	0	10	11	0	10
AAAAAC/GTTTTT	11	0	11	0	0	0	11	11	0
ACAGAGTACGGG/CCCGTACTCTGT	10	0	5	0	426	216	10	5	642
AATAATAATCGT/ACGATTATTATT	5	5	0	0	0	0	10	0	0
ACAGCACCGCAGCAGCAG/CTGCTGCTGCGGTGCTGT	7	3	0	0	0	0	10	0	0
AAAAAT/ATTTTT	9	0	54	0	39	21	9	54	60
AAAAGAATAGAATAGAATAG/CTATTCTATTCTATTCTTTT	6	3	68	58	6	0	9	126	6
AACAGAACAGAG/CTCTGTTCTGTT	9	0	2083	1728	0	0	9	3811	0
AACAGAACAGAACAGAACGG/CCGTTCTGTTCTGTTCTGTT	3	6	0	0	0	0	9	0	0
AACAGAACAGAACATGTCCG/CGGACATGTTCTGTTCTGTT	3	6	0	0	0	0	9	0	0
AACAGTAATAGTAATAGT/ACTATTACTATTACTGTT	3	6	0	0	0	0	9	0	0
AACTGT/ACAGTT	9	0	0	0	0	0	9	0	0
AATAGG/CCTATT	9	0	0	0	0	0	9	0	0
ACGGGG/CCCCGT	0	9	0	0	0	0	9	0	0
AAAAAAC/GTTTTTT	0	8	590	628	429	53	8	1218	482
AAAAGAATAGAATAG/CTATTCTATTCTTTT	8	0	6814	7401	28	13	8	14215	41
AACAGAACATGCTCG/CGAGCATGTTCTGTT	4	4	4	0	4	0	8	4	4
AAAAGAAAATGAG/CTCATTTTCTTTT	8	0	0	0	4	0	8	0	4
AACATAG/CTATGTT	8	0	0	0	0	0	8	0	0
AAGAGTAGAG/CTCTACTCTT	0	8	0	0	0	0	8	0	0
AATAGTAATAGTGT/ACACTATTACTATT	8	0	0	0	0	0	8	0	0
AATAGTACTAGTACTAGT/ACTAGTACTAGTACTATT	3	5	0	0	0	0	8	0	0
AATATAC/GTATATT	0	8	0	0	0	0	8	0	0
AAGAATAGAC/GTCTATTCTT	7	0	0	0	3537	3197	7	0	6734
AATATAATGT/ACATTATATT	0	7	575	423	217	328	7	998	545
AAAAGAAAAGAATAG/CTATTCTTTTCTTTT	0	7	8700	8601	11	9	7	17301	20
ACCGAGTCCGGG/CCCGGACTCGGT	7	0	523	164	0	0	7	687	0
AACCATCC/GGATGGTT	7	0	42	28	0	0	7	70	0
AAAAAAAG/CTTTTTTT	7	0	0	0	0	0	7	0	0
AAAACATAT/ATATGTTTT	0	7	0	0	0	0	7	0	0
AAATAATAAT/ATTATTATTT	0	7	0	0	0	0	7	0	0
AATAGTCATAGT/ACTATGACTATT	7	0	0	0	0	0	7	0	0
ACCAGGTCCGCCAGGTCC/GGACCTGGCGGACCTGGT	4	3	0	0	0	0	7	0	0
AAATTCTATT/AATAGAATTT	6	0	8	0	4527	4812	6	8	9339
AAAATAGAAT/ATTCTATTTT	0	6	19	12	4086	4211	6	31	8297
AATACCAATAGAATAG/CTATTCTATTGGTATT	6	0	0	0	1865	1479	6	0	3344
AACAGGACAG/CTGTCCTGTT	6	0	32	33	158	60	6	65	218
AACAGAACAGAAGAG/CTCTTCTGTTCTGTT	0	6	27	30	0	0	6	57	0
ACTACTACTACTCCT/AGGAGTAGTAGTAGT	6	0	10	5	0	0	6	15	0
AAAGATAGT/ACTATCTTT	0	6	0	0	0	0	6	0	0
AACCACCAC/GTGGTGGTT	6	0	0	0	0	0	6	0	0
AATAATACT/AGTATTATT	0	6	0	0	0	0	6	0	0
AGCAGCAGCAGCAGCAGG/CCTGCTGCTGCTGCTGCT	3	3	0	0	0	0	6	0	0
AAGAGAAGAGAG/CTCTCTTCTCTT	5	0	29	18	16584	15248	5	47	31832
AAAATAGAATAGAAT/ATTCTATTCTATTTT	5	0	16	24	123	152	5	40	275
AATATGATATG/CATATCATATT	5	0	0	0	75	70	5	0	145
AAAATATAATATAAT/ATTATATTATATTTT	0	5	0	33	4	39	5	33	43
AACACAGAACAG/CTGTTCTGTGTT	0	5	1241	414	10	0	5	1655	10
AACACAGAACAGAACAG/CTGTTCTGTTCTGTGTT	5	0	4374	3419	4	0	5	7793	4
AAAATTCTAATTAATAATAT/ATATTATTAATTAGAATTTT	5	0	314	214	0	0	5	528	0
AAATATAATAT/ATATTATATTT	0	5	46	100	0	0	5	146	0
AACACAACACAC/GTGTGTTGTGTT	5	0	6	23	0	0	5	29	0
AACAGCAGCAGC/GCTGCTGCTGTT	5	0	12	5	0	0	5	17	0
AAAACATATAT/ATATATGTTTT	5	0	0	0	0	0	5	0	0
ACCCTGGGCCTG/CAGGCCCAGGGT	5	0	0	0	0	0	5	0	0
ACCGTCAGCGGG/CCCGCTGACGGT	0	5	0	0	0	0	5	0	0
AAACAATTAACAAT/ATTGTTAATTGTTT	4	0	0	0	1614	1234	4	0	2848
AAGAGAATAGAATAG/CTATTCTATTCTCTT	4	0	0	0	219	167	4	0	386
AAAAAACAATAAAC/GTTTATTGTTTTTT	4	0	0	0	116	26	4	0	142
AATAGAATATAATAT/ATATTATATTCTATT	4	0	12	22	30	37	4	34	67
AACAGAACAGAATAG/CTATTCTGTTCTGTT	0	4	731	506	23	13	4	1237	36
AATATAATATATTAT/ATAATATATTATATT	0	4	18	24	0	21	4	42	21
AATAATATAATAT/ATATTATATTATT	0	4	32	56	9	5	4	88	14
AATATATAGTATAT/ATATACTATATATT	4	0	0	0	0	10	4	0	10
AACAAGTTCTGTTCG/CGAACAGAACTTGTT	4	0	3654	3021	0	0	4	6675	0
AATAATAATAATAATTAT/ATAATTATTATTATTATT	0	4	3	0	0	0	4	3	0
AAAAGAACATGTTAG/CTAACATGTTCTTTT	0	4	0	0	0	0	4	0	0
AAAATATAATATAT/ATATATTATATTTT	0	4	0	0	0	0	4	0	0
AAATTCGAACAGAAC/GTTCTGTTCGAATTT	0	4	0	0	0	0	4	0	0
AAATTGTTAATTGT/ACAATTAACAATTT	4	0	0	0	0	0	4	0	0
AACAACACCAACTAC/GTAGTTGGTGTTGTT	4	0	0	0	0	0	4	0	0
AAGAGAAGAGAAGAGAAGGG/CCCTTCTCTTCTCTTCTCTT	0	4	0	0	0	0	4	0	0
AATATAATATTATAT/ATATAATATTATATT	4	0	0	0	0	0	4	0	0
AATCAGATGGGGGG/CCCCCCATCTGATT	4	0	0	0	0	0	4	0	0
AAAAAGAAAGATCCCTGC/GCAGGGATCTTTCTTTTT	3	0	0	0	84	81	3	0	165
AAAGCCACCAAAGGAGCC/GGCTCCTTTGGTGGCTTT	3	0	22	33	16	13	3	55	29
AATAATATATAATATAT/ATATATTATATATTATT	0	3	0	0	16	6	3	0	22
AAATTATATTATATTATATT/AATATAATATAATATAATTT	3	0	18	6	8	8	3	24	16
AACAGAACAGAACAGAG/CTCTGTTCTGTTCTGTT	0	3	1801	1572	7	3	3	3373	10
AAAAGAACAGAACAGAATAG/CTATTCTGTTCTGTTCTTTT	3	0	89	126	0	0	3	215	0
AAATACAAATTTAAGATATT/AATATCTTAAATTTGTATTT	3	0	78	69	0	0	3	147	0
AAAATATAATATAATAT/ATATTATATTATATTTT	3	0	0	9	0	0	3	9	0
AAAAAAAAAAATTTTTTT/AAAAAAATTTTTTTTTTT	0	3	0	0	0	0	3	0	0
AAAAAAAAATATTTTTT/AAAAAATATTTTTTTTT	3	0	0	0	0	0	3	0	0
AAATAATAATAATAATCG/CGATTATTATTATTATTT	0	3	0	0	0	0	3	0	0
AACAACACATGCAGCAGC/GCTGCTGCATGTGTTGTT	0	3	0	0	0	0	3	0	0
AACACCAATACCAATACC/GGTATTGGTATTGGTGTT	0	3	0	0	0	0	3	0	0
AACAGTAATAGAGTAATAGT/ACTATTACTCTATTACTGTT	3	0	0	0	0	0	3	0	0
AACCCTGGGCCACCGCCG/CGGCGGTGGCCCAGGGTT	0	3	0	0	0	0	3	0	0
AAGAGAAGAGAAGGGAAGGG/CCCTTCCCTTCTCTTCTCTT	3	0	0	0	0	0	3	0	0
AAGCACACACACACACAT/ATGTGTGTGTGTGTGCTT	0	3	0	0	0	0	3	0	0
AATAATAATAATAATACT/AGTATTATTATTATTATT	0	3	0	0	0	0	3	0	0
AATAGTAATAGTAATATTGT/ACAATATTACTATTACTATT	3	0	0	0	0	0	3	0	0
ACAGATAGTACGGATAGT/ACTATCCGTACTATCTGT	0	3	0	0	0	0	3	0	0
AAGAGAAGTG/CACTTCTCTT	0	0	0	0	9372	8435	0	0	17807
AAGAGAATCG/CGATTCTCTT	0	0	7	0	5134	4060	0	7	9194
AGAGATGAGATATG/CATATCTCATCTCT	0	0	0	0	4963	4117	0	0	9080
AAAATT/AATTTT	0	0	0	0	3671	3579	0	0	7250
AATACCAATAG/CTATTGGTATT	0	0	0	0	3720	3351	0	0	7071
AAACAACAAC/GTTGTTGTTT	0	0	8	8	4159	2175	0	16	6334
AACAGAACTG/CAGTTCTGTT	0	0	202	88	3237	2829	0	290	6066
AAATAACAAC/GTTGTTATTT	0	0	0	0	3130	2834	0	0	5964
AAAGAGAAGAG/CTCTTCTCTTT	0	0	0	0	2576	2329	0	0	4905
AAATGG/CCATTT	0	0	0	0	1979	1948	0	0	3927
AAAAGAG/CTCTTTT	0	0	0	0	1669	2230	0	0	3899
ACTCTAT/ATAGAGT	0	0	0	0	1989	1682	0	0	3671
AAGAATAGAATAGAC/GTCTATTCTATTCTT	0	0	0	0	1713	1854	0	0	3567
AAAGATAT/ATATCTTT	0	0	0	0	1685	1792	0	0	3477
AAGAGAATAC/GTATTCTCTT	0	0	0	0	1956	1462	0	0	3418
AAATAGAAATATAG/CTATATTTCTATTT	0	0	4	0	1524	1698	0	4	3222
ACAGG/CCTGT	0	0	68	14	1877	1160	0	82	3037
AAAATAGAATAGAATAG/CTATTCTATTCTATTTT	0	0	0	0	1504	1524	0	0	3028
AAGCAAT/ATTGCTT	0	0	0	0	1556	1226	0	0	2782
AAAAGAGAAGAGAAC/GTTCTCTTCTCTTTT	0	0	4	0	1559	1193	0	4	2752
AAGAGAGAG/CTCTCTCTT	0	0	11	0	1546	918	0	11	2464
AAAAGAGAAGAGAAGAGAAC/GTTCTCTTCTCTTCTCTTTT	0	0	0	0	1383	866	0	0	2249
AAAGAG/CTCTTT	0	0	0	0	1119	850	0	0	1969
AAAAGAGAAC/GTTCTCTTTT	0	0	0	0	1030	881	0	0	1911
AAACAAACAAC/GTTGTTTGTTT	0	0	0	0	982	575	0	0	1557
AAACGAT/ATCGTTT	0	0	0	0	889	644	0	0	1533
AATAGTATAG/CTATACTATT	0	0	0	0	588	657	0	0	1245
AAATATAG/CTATATTT	0	0	0	0	678	519	0	0	1197
AACAGAGCAG/CTGCTCTGTT	0	0	41	45	745	436	0	86	1181
AAGAGAAGAGAATAG/CTATTCTCTTCTCTT	0	0	0	0	525	592	0	0	1117
AAAATAGAAAATAGAATAG/CTATTCTATTTTCTATTTT	0	0	0	0	487	555	0	0	1042
ACTAT/ATAGT	0	0	63	105	399	592	0	168	991
AAGAGAGAGAG/CTCTCTCTCTT	0	0	0	0	514	430	0	0	944
AAACAAACAACAAT/ATTGTTGTTTGTTT	0	0	0	0	557	360	0	0	917
AACAACAATC/GATTGTTGTT	0	0	0	0	512	361	0	0	873
AACTG/CAGTT	0	0	1314	970	533	300	0	2284	833
AGAGATG/CATCTCT	0	0	0	0	483	266	0	0	749
AAAAATATTCT/AGAATATTTTT	0	0	0	0	395	352	0	0	747
AAAATAGAATAG/CTATTCTATTTT	0	0	0	0	384	357	0	0	741
AGAGATGAGATG/CATCTCATCTCT	0	0	0	0	409	203	0	0	612
AAAATAG/CTATTTT	0	0	0	0	287	298	0	0	585
AAGAGAATGG/CCATTCTCTT	0	0	0	0	258	273	0	0	531
AATAGAATAGAATAGAATGG/CCATTCTATTCTATTCTATT	0	0	0	0	210	303	0	0	513
AATAGATTAG/CTAATCTATT	0	0	0	0	213	295	0	0	508
AAGAGATGAG/CTCATCTCTT	0	0	0	0	280	191	0	0	471
AATAGAATAGAATTG/CAATTCTATTCTATT	0	0	4	0	245	220	0	4	465
AAGAGAAGAGAGAG/CTCTCTCTTCTCTT	0	0	0	0	300	154	0	0	454
AATAGAATAGAATGG/CCATTCTATTCTATT	0	0	0	0	223	231	0	0	454
AAATTT/AAATTT	0	0	0	0	249	196	0	0	445
AAAC/GTTT	0	0	0	0	170	232	0	0	402
AAACAAG/CTTGTTT	0	0	0	0	221	173	0	0	394
AATAGAATTC/GAATTCTATT	0	0	0	0	237	116	0	0	353
AAATTCAATT/AATTGAATTT	0	0	63	73	140	209	0	136	349
AATCGAATTG/CAATTCGATT	0	0	0	0	156	182	0	0	338
AATAGAATTGAATGG/CCATTCAATTCTATT	0	0	0	0	169	167	0	0	336
ACCGCGTACGGG/CCCGTACGCGGT	0	0	5	0	227	106	0	5	333
AAGGGAATAG/CTATTCCCTT	0	0	0	0	161	169	0	0	330
AAATATTAT/ATAATATTT	0	0	54	61	160	167	0	115	327
AATAGAATAGTATAG/CTATACTATTCTATT	0	0	0	0	170	145	0	0	315
AAATAATAATATATAT/ATATATATTATTATTT	0	0	5	0	164	149	0	5	313
AATATATAATATATATAT/ATATATATATTATATATT	0	0	0	8	147	161	0	8	308
AACAGGACAGGACAG/CTGTCCTGTCCTGTT	0	0	0	0	164	130	0	0	294
AATAGAATAGAATAGAATTG/CAATTCTATTCTATTCTATT	0	0	3	0	128	163	0	3	291
AAATAAATT/AATTTATTT	0	0	0	0	113	176	0	0	289
AATCT/AGATT	0	0	295	409	152	126	0	704	278
AATATAATATATAATATT/AATATTATATATTATATT	0	0	0	0	154	122	0	0	276
AATACAATAGAATAGAATAG/CTATTCTATTCTATTGTATT	0	0	0	0	149	108	0	0	257
AAAATATAGAATATATAT/ATATATATTCTATATTTT	0	0	0	0	141	108	0	0	249
AAACAACAACAAC/GTTGTTGTTGTTT	0	0	0	0	164	83	0	0	247
AATATGGG/CCCATATT	0	0	0	0	155	87	0	0	242
AATATGTACATACATAC/GTATGTATGTACATATT	0	0	0	0	111	129	0	0	240
AAACAAACAAT/ATTGTTTGTTT	0	0	0	0	151	87	0	0	238
AACACTG/CAGTGTT	0	0	0	0	144	88	0	0	232
AAAACAACAAC/GTTGTTGTTTT	0	0	0	0	159	72	0	0	231
AAGAGAGTAG/CTACTCTCTT	0	0	0	0	137	88	0	0	225
AGATAGATATATAGATAT/ATATCTATATATCTATCT	0	0	0	0	114	107	0	0	221
AAGAGAATAT/ATATTCTCTT	0	0	0	0	100	119	0	0	219
AATAGAATGGAATGG/CCATTCCATTCTATT	0	0	0	0	76	143	0	0	219
AAAATAAAATAGAAT/ATTCTATTTTATTTT	0	0	0	0	77	141	0	0	218
ACCTATAGC/GCTATAGGT	0	0	0	0	144	70	0	0	214
AACATAATCG/CGATTATGTT	0	0	0	0	98	109	0	0	207
AGATAGATAT/ATATCTATCT	0	0	0	0	115	92	0	0	207
AAAGTACTACTG/CAGTAGTACTTT	0	0	0	0	125	75	0	0	200
AATAATAATATATATAATAT/ATATTATATATATTATTATT	0	0	0	0	114	84	0	0	198
AACATTCAGGAC/GTCCTGAATGTT	0	0	0	0	115	75	0	0	190
AAGAGAGAAGAGAGAG/CTCTCTCTTCTCTCTT	0	0	0	0	135	55	0	0	190
AAAATCTGTAGCGAATACCC/GGGTATTCGCTACAGATTTT	0	0	0	0	99	90	0	0	189
AATAGGATGG/CCATCCTATT	0	0	0	0	93	96	0	0	189
AAGAGAAGAGAAGAGAATAG/CTATTCTCTTCTCTTCTCTT	0	0	0	0	98	87	0	0	185
AAACAAACAACAAC/GTTGTTGTTTGTTT	0	0	0	0	98	85	0	0	183
AAAATAAATATATATATAG/CTATATATATATTTATTTT	0	0	0	3	99	80	0	3	179
AAATAATCTAATAATCT/AGATTATTAGATTATTT	0	0	0	0	79	93	0	0	172
AACATGTTCCATTCG/CGAATGGAACATGTT	0	0	0	0	104	68	0	0	172
AACTCAACTGCATTGGT/ACCAATGCAGTTGAGTT	0	0	0	0	96	69	0	0	165
AAACAAACAACAAACAAC/GTTGTTTGTTGTTTGTTT	0	0	0	0	133	29	0	0	162
AACATTGAATAAGC/GCTTATTCAATGTT	0	0	0	0	92	64	0	0	156
AAGAGAATAGAATAGAATAG/CTATTCTATTCTATTCTCTT	0	0	0	0	67	89	0	0	156
AAGAGAAGAGG/CCTCTTCTCTT	0	0	0	0	81	73	0	0	154
AATACAATACAATAGAATAG/CTATTCTATTGTATTGTATT	0	0	0	0	99	54	0	0	153
AACAAGTTCTAACAG/CTGTTAGAACTTGTT	0	0	0	0	68	84	0	0	152
AGGCCC/GGGCCT	0	0	308	227	80	71	0	535	151
AAGAGAGGAG/CTCCTCTCTT	0	0	0	0	96	54	0	0	150
AAATAGAAATAGAAATATAG/CTATATTTCTATTTCTATTT	0	0	0	0	64	81	0	0	145
AACAGAATAGAATAG/CTATTCTATTCTGTT	0	0	1785	1603	96	48	0	3388	144
AAAAAAAGAAGAGGAGAG/CTCTCCTCTTCTTTTTTT	0	0	84	141	78	66	0	225	144
ACATCTCATCTC/GAGATGAGATGT	0	0	0	0	112	28	0	0	140
AAATAACAAATAACAAC/GTTGTTATTTGTTATTT	0	0	0	0	95	39	0	0	134
AATAGAATAGAATCG/CGATTCTATTCTATT	0	0	0	0	74	60	0	0	134
AATAGGAGAG/CTCTCCTATT	0	0	0	0	90	42	0	0	132
ACTGCC/GGCAGT	0	0	0	0	68	58	0	0	126
AAACAACAAACAACAAC/GTTGTTGTTTGTTGTTT	0	0	6	3	97	27	0	9	124
AATAGAATGGAATAGAATTG/CAATTCTATTCCATTCTATT	0	0	0	0	63	54	0	0	117
AAACAACAATAAACAAT/ATTGTTTATTGTTGTTT	0	0	0	0	67	48	0	0	115
AAGAGCAGAG/CTCTGCTCTT	0	0	0	0	55	54	0	0	109
AATATT/AATATT	0	0	0	0	63	45	0	0	108
AACAATCAATAATC/GATTATTGATTGTT	0	0	0	0	65	40	0	0	105
AACCATACCC/GGGTATGGTT	0	0	0	0	48	57	0	0	105
AAGAGAAGAGAAGAGAGAG/CTCTCTCTTCTCTTCTCTT	0	0	0	0	63	42	0	0	105
AAATAATAATAATAC/GTATTATTATTATTT	0	0	0	0	63	41	0	0	104
AAATAAGATATAATAATAT/ATATTATTATATCTTATTT	0	0	0	0	72	30	0	0	102
AATAATCGACAATC/GATTGTCGATTATT	0	0	0	0	56	44	0	0	100
AAAATAACGGTTACC/GGTAACCGTTATTTT	0	0	250	173	63	36	0	423	99
AAATTATATT/AATATAATTT	0	0	0	0	73	26	0	0	99
AATAATTG/CAATTATT	0	0	0	0	42	56	0	0	98
AATAGACTAG/CTAGTCTATT	0	0	0	0	62	35	0	0	97
AACATAT/ATATGTT	0	0	0	0	56	40	0	0	96
AAGAGAAGAGAAGAGAG/CTCTCTTCTCTTCTCTT	0	0	0	0	27	68	0	0	95
AAATAATCT/AGATTATTT	0	0	0	0	44	50	0	0	94
AAACAACAAT/ATTGTTGTTT	0	0	0	0	54	39	0	0	93
AATAATCT/AGATTATT	0	0	0	14	30	61	0	14	91
AACAATCAACCATC/GATGGTTGATTGTT	0	0	0	0	50	39	0	0	89
AACAGCAACTGCAGC/GCTGCAGTTGCTGTT	0	0	0	0	56	32	0	0	88
AAAGTATAT/ATATACTTT	0	0	0	0	48	36	0	0	84
AAAGATGAGCCATTG/CAATGGCTCATCTTT	0	0	0	0	36	47	0	0	83
AAGACAAGAG/CTCTTGTCTT	0	0	0	0	57	26	0	0	83
AAACAATAAGCAAT/ATTGCTTATTGTTT	0	0	0	0	38	44	0	0	82
ACATCTCATCTCATCTC/GAGATGAGATGAGATGT	0	0	0	0	70	12	0	0	82
AACATCGCAGCAGCAACTGC/GCAGTTGCTGCTGCGATGTT	0	0	0	0	45	36	0	0	81
AATAATAATAATAATATAT/ATATATTATTATTATTATT	0	0	0	0	39	42	0	0	81
AACAACTGCAGCAGC/GCTGCTGCAGTTGTT	0	0	29	5	63	16	0	34	79
AAGAGAATACCAATAG/CTATTGGTATTCTCTT	0	0	0	0	42	37	0	0	79
ACCAGCAGT/ACTGCTGGT	0	0	75	35	48	29	0	110	77
AATAATAGAATTG/CAATTCTATTATT	0	0	0	0	52	24	0	0	76
AAATATATTATAAATATTAT/ATAATATTTATAATATATTT	0	0	138	77	42	33	0	215	75
AAGCGGAAGTGCCAGTGG/CCACTGGCACTTCCGCTT	0	0	0	0	51	21	0	0	72
AAAGAGAGTACTGAGAAG/CTTCTCAGTACTCTCTTT	0	0	0	0	38	33	0	0	71
AAGAGAAGTGAAGAGAGGAG/CTCCTCTCTTCACTTCTCTT	0	0	0	0	39	30	0	0	69
AAAACAACAAAACAACAAC/GTTGTTGTTTTGTTGTTTT	0	0	0	0	39	26	0	0	65
AACAGAACATGTTCGACAG/CTGTCGAACATGTTCTGTT	0	0	0	0	39	24	0	0	63
AATAGAATCGAATCG/CGATTCGATTCTATT	0	0	0	0	40	23	0	0	63
AATAGAATGGAATGGAATGG/CCATTCCATTCCATTCTATT	0	0	0	0	32	30	0	0	62
AAAGAACATGTTCG/CGAACATGTTCTTT	0	0	0	0	40	21	0	0	61
AATAGAATTGAATTGAATTG/CAATTCAATTCAATTCTATT	0	0	0	0	34	27	0	0	61
AATACAATAT/ATATTGTATT	0	0	0	7	18	39	0	7	57
AGAGG/CCTCT	0	0	0	0	11	46	0	0	57
AAAATAAGTAAAG/CTTTACTTATTTT	0	0	0	0	24	32	0	0	56
AAACAAACGGACGGAC/GTCCGTCCGTTTGTTT	0	0	0	0	52	4	0	0	56
AAACAAACAAACAAT/ATTGTTTGTTTGTTT	0	0	0	0	29	26	0	0	55
AAATTGTATCGATAGTTAGG/CCTAACTATCGATACAATTT	0	0	0	0	39	15	0	0	54
AAGAGAAGAGAGAAGAGAG/CTCTCTTCTCTCTTCTCTT	0	0	0	0	33	21	0	0	54
AAACACTCACCCACACAC/GTGTGTGGGTGAGTGTTT	0	0	0	0	30	18	0	0	48
AAATATATTAT/ATAATATATTT	0	0	11	27	20	25	0	38	45
AAAATAAAATAAAATAGAAT/ATTCTATTTTATTTTATTTT	0	0	0	0	16	29	0	0	45
AATAGAATTGAATTG/CAATTCAATTCTATT	0	0	0	0	16	29	0	0	45
AACAGTACAG/CTGTACTGTT	0	0	3500	2615	12	31	0	6115	43
AAGAGAAGAGAATAGAATAG/CTATTCTATTCTCTTCTCTT	0	0	0	0	22	21	0	0	43
AAGAGAATAGAAGGGAATAG/CTATTCCCTTCTATTCTCTT	0	0	0	0	22	21	0	0	43
AAAACAAT/ATTGTTTT	0	0	0	0	17	25	0	0	42
AAATAACAAATAATAAC/GTTATTATTTGTTATTT	0	0	0	0	27	15	0	0	42
AACAACAGCAACAGCAGC/GCTGCTGTTGCTGTTGTT	0	0	0	0	30	12	0	0	42
AATAGAGTAG/CTACTCTATT	0	0	0	0	24	18	0	0	42
AAACAACAAATAAC/GTTATTTGTTGTTT	0	0	0	0	19	22	0	0	41
AATATAATATAATATATAC/GTATATATTATATTATATT	0	0	0	0	18	23	0	0	41
AAAATATAAT/ATTATATTTT	0	0	20	21	6	34	0	41	40
AAAATACAATAGAAT/ATTCTATTGTATTTT	0	0	0	0	20	20	0	0	40
AATCCGCTGATG/CATCAGCGGATT	0	0	0	0	30	10	0	0	40
AAACGGAC/GTCCGTTT	0	0	199	102	31	8	0	301	39
AATAGAATAGAATTAG/CTAATTCTATTCTATT	0	0	36	59	10	29	0	95	39
AACTGCTGCGGCTGATGG/CCATCAGCCGCAGCAGTT	0	0	0	0	15	24	0	0	39
AATGTAATGTACTGT/ACAGTACATTACATT	0	0	0	0	33	4	0	0	37
AAATTAT/ATAATTT	0	0	17	0	12	24	0	17	36
AATAGAATAGAATGGAATGG/CCATTCCATTCTATTCTATT	0	0	0	0	15	21	0	0	36
ACACCGAGGAGG/CCTCCTCGGTGT	0	0	30	13	24	11	0	43	35
AAATATAATATATATAT/ATATATATATTATATTT	0	0	0	0	20	15	0	0	35
AAAACAT/ATGTTTT	0	0	17	16	17	17	0	33	34
AATAATATAT/ATATATTATT	0	0	36	30	7	26	0	66	33
AAATATAATT/AATTATATTT	0	0	0	0	13	20	0	0	33
AATAGTATAGTATAG/CTATACTATACTATT	0	0	0	0	20	12	0	0	32
AACAGAACATGTTCGAAG/CTTCGAACATGTTCTGTT	0	0	0	0	7	24	0	0	31
AAGAGAATAGAAGAGAATCG/CGATTCTCTTCTATTCTCTT	0	0	0	0	9	22	0	0	31
AAGAGAATCGAATCGAATCG/CGATTCGATTCGATTCTCTT	0	0	0	0	25	6	0	0	31
AAGGTGGCGACC/GGTCGCCACCTT	0	0	0	0	31	0	0	0	31
AAATAACATATAAC/GTTATATGTTATTT	0	0	0	0	18	12	0	0	30
AACAGAACTGGACTG/CAGTCCAGTTCTGTT	0	0	0	0	24	6	0	0	30
AATAGAG/CTCTATT	0	0	0	0	11	19	0	0	30
ACCACTGGAGGCTCATCG/CGATGAGCCTCCAGTGGT	0	0	0	0	21	9	0	0	30
AACAGAACAGAATAGAATAG/CTATTCTATTCTGTTCTGTT	0	0	215	202	9	18	0	417	27
AAGGAG/CTCCTT	0	0	9	18	18	9	0	27	27
AAAAAACAACAAAC/GTTTGTTGTTTTTT	0	0	0	0	17	9	0	0	26
AGATATG/CATATCT	0	0	0	0	8	18	0	0	26
AATACAATATAATATAATAT/ATATTATATTATATTGTATT	0	0	0	12	0	24	0	12	24
AACGGACAGAACGGACTG/CAGTCCGTTCTGTCCGTT	0	0	0	0	12	12	0	0	24
AAGAGAATTG/CAATTCTCTT	0	0	0	0	12	12	0	0	24
AAGTCTATTC/GAATAGACTT	0	0	0	0	6	18	0	0	24
AATATAGTAT/ATACTATATT	0	0	0	0	6	18	0	0	24
ACACACACGC/GCGTGTGTGT	0	0	0	0	24	0	0	0	24
AGCAGGAGGCGCAGGAGG/CCTCCTGCGCCTCCTGCT	0	0	0	0	12	12	0	0	24
AAAAAAAAAAAAAC/GTTTTTTTTTTTTT	0	0	0	0	17	6	0	0	23
AAGAGAATCGAATCG/CGATTCGATTCTCTT	0	0	0	0	14	9	0	0	23
AAACAACAATCGAC/GTCGATTGTTGTTT	0	0	0	0	9	13	0	0	22
AACTGAACTGGACTG/CAGTCCAGTTCAGTT	0	0	0	0	14	8	0	0	22
AATACAATATAATAT/ATATTATATTGTATT	0	0	0	0	13	9	0	0	22
AAAATAATATAATAT/ATATTATATTATTTT	0	0	4	23	12	8	0	27	20
AATATAATATAATGT/ACATTATATTATATT	0	0	0	18	20	0	0	18	20
AAAATATATAATAT/ATATTATATATTTT	0	0	0	0	9	10	0	0	19
AATACAATACAATAG/CTATTGTATTGTATT	0	0	0	0	8	10	0	0	18
AATATACTAT/ATAGTATATT	0	0	0	0	6	12	0	0	18
ACCACCCACTCCACCTGC/GCAGGTGGAGTGGGTGGT	0	0	0	0	15	3	0	0	18
AACAGAG/CTCTGTT	0	0	4523	3902	17	0	0	8425	17
AACAGAATAGAATAGAATAG/CTATTCTATTCTATTCTGTT	0	0	795	699	9	7	0	1494	16
AATATAATATAATATAGTAT/ATACTATATTATATTATATT	0	0	0	0	7	9	0	0	16
AGAGGCAGCGGCGGCAGC/GCTGCCGCCGCTGCCTCT	0	0	12	9	12	3	0	21	15
ACAGGTGCTGGTGGTGGC/GCCACCACCAGCACCTGT	0	0	10	0	12	3	0	10	15
AATACAATACAATATAATAT/ATATTATATTGTATTGTATT	0	0	3	0	5	10	0	3	15
AAAATAAAATAGAATAGAAT/ATTCTATTCTATTTTATTTT	0	0	0	0	3	12	0	0	15
AAGAGAATTGAATAGAATAG/CTATTCTATTCAATTCTCTT	0	0	0	0	9	6	0	0	15
AATAGAATAGAATAGAATGT/ACATTCTATTCTATTCTATT	0	0	0	0	12	3	0	0	15
AATAGAATATAATATAATAT/ATATTATATTATATTCTATT	0	0	0	0	6	9	0	0	15
AAACAAACAAACAAC/GTTGTTTGTTTGTTT	0	0	0	0	10	4	0	0	14
AAAACAAAACAC/GTGTTTTGTTTT	0	0	4248	3324	5	8	0	7572	13
AAAATATAATATAATATAAT/ATTATATTATATTATATTTT	0	0	3	20	0	13	0	23	13
AACATAATAT/ATATTATGTT	0	0	0	7	6	7	0	7	13
AACAGAACAGAACAGGACAG/CTGTCCTGTTCTGTTCTGTT	0	0	0	0	13	0	0	0	13
AACATGTTCGAAG/CTTCGAACATGTT	0	0	0	0	0	12	0	0	12
AACCACCAACCCCACCAC/GTGGTGGGGTTGGTGGTT	0	0	0	0	9	3	0	0	12
AAGAGAATCGATTCGAATCG/CGATTCGAATCGATTCTCTT	0	0	0	0	9	3	0	0	12
AATAGAATAGAATTGAATTG/CAATTCAATTCTATTCTATT	0	0	0	0	12	0	0	0	12
ACATCGG/CCGATGT	0	0	55	0	11	0	0	55	11
AAGAGACGAG/CTCGTCTCTT	0	0	0	0	11	0	0	0	11
AAATGC/GCATTT	0	0	2855	2304	10	0	0	5159	10
AAATAATATATAAT/ATTATATATTATTT	0	0	0	0	5	5	0	0	10
AACAACAGCAGC/GCTGCTGTTGTT	0	0	0	0	5	5	0	0	10
AAGAGAGGAGAG/CTCTCCTCTCTT	0	0	0	0	0	10	0	0	10
AATAATATAATATAC/GTATATTATATTATT	0	0	0	0	10	0	0	0	10
AAACATGATCTGTTC/GAACAGATCATGTTT	0	0	1359	914	0	9	0	2273	9
AATAGCTG/CAGCTATT	0	0	76	55	9	0	0	131	9
AAAAGAAGAGAATAGAAGAG/CTCTTCTATTCTCTTCTTTT	0	0	0	0	9	0	0	0	9
AAAGAGAAGAGAAGAG/CTCTTCTCTTCTCTTT	0	0	0	0	5	4	0	0	9
AAATCCTGGGCCACCGCC/GGCGGTGGCCCAGGATTT	0	0	0	0	9	0	0	0	9
AAATGAATAGAATTGAATAG/CTATTCAATTCTATTCATTT	0	0	0	0	9	0	0	0	9
AACAATTAATAATT/AATTATTAATTGTT	0	0	0	0	5	4	0	0	9
AAGAGAAGAGAAGAGAAGTG/CACTTCTCTTCTCTTCTCTT	0	0	0	0	3	6	0	0	9
AAGAGAATAGCAGAGAATAG/CTATTCTCTGCTATTCTCTT	0	0	0	0	3	6	0	0	9
AAATGTAAATGTGT/ACACATTTACATTT	0	0	2571	1900	8	0	0	4471	8
AACTGACT/AGTCAGTT	0	0	788	567	8	0	0	1355	8
AACAGAACAGAACAGAACTG/CAGTTCTGTTCTGTTCTGTT	0	0	3	3	4	4	0	6	8
AAACAACACTCAAC/GTTGAGTGTTGTTT	0	0	0	0	4	4	0	0	8
AAGATAATATAATAT/ATATTATATTATCTT	0	0	0	0	0	8	0	0	8
AATAATTAT/ATAATTATT	0	0	0	0	0	8	0	0	8
AATATAGTATAGTAT/ATACTATACTATATT	0	0	0	0	8	0	0	0	8
ACCCCCC/GGGGGGT	0	0	0	0	0	8	0	0	8
AATATAATATATAATATAT/ATATATTATATATTATATT	0	0	3	13	0	7	0	16	7
AAACCAAC/GTTGGTTT	0	0	0	0	0	7	0	0	7
AAAGTAAAGTAAGT/ACTTACTTTACTTT	0	0	0	0	0	7	0	0	7
AATAATAATAGT/ACTATTATTATT	0	0	0	0	7	0	0	0	7
AATAGAATAGAATATAATAT/ATATTATATTCTATTCTATT	0	0	0	0	0	7	0	0	7
AATATAATGTAATGTAATGT/ACATTACATTACATTATATT	0	0	0	0	0	7	0	0	7
AATATAATTG/CAATTATATT	0	0	0	0	7	0	0	0	7
AAAAAACAAAAC/GTTTTGTTTTTT	0	0	1308	1309	6	0	0	2617	6
AAAAGAACAG/CTGTTCTTTT	0	0	90	63	6	0	0	153	6
AAAATAATAT/ATATTATTTT	0	0	43	19	0	6	0	62	6
AAAAAAAAAG/CTTTTTTTTT	0	0	6	0	0	6	0	6	6
AAAAAAGAAGAGAAGAGG/CCTCTTCTCTTCTTTTTT	0	0	0	0	6	0	0	0	6
AAAACAGAACATGTTCGAAC/GTTCGAACATGTTCTGTTTT	0	0	0	0	3	3	0	0	6
AAAATACAATACAATAGAAT/ATTCTATTGTATTGTATTTT	0	0	0	0	3	3	0	0	6
AAAGAGAAGAGAGAAGAG/CTCTTCTCTCTTCTCTTT	0	0	0	0	3	3	0	0	6
AACAGAACAGAACAGAGCAG/CTGCTCTGTTCTGTTCTGTT	0	0	0	0	0	6	0	0	6
AACATAAGCAACATCAGC/GCTGATGTTGCTTATGTT	0	0	0	0	3	3	0	0	6
AACGGACAG/CTGTCCGTT	0	0	0	0	6	0	0	0	6
AAGAATATATATATATATAT/ATATATATATATATATTCTT	0	0	0	0	6	0	0	0	6
AAGAGAATAGAAGAGAGTAG/CTACTCTCTTCTATTCTCTT	0	0	0	0	0	6	0	0	6
AATATATAATATATATATAT/ATATATATATATTATATATT	0	0	0	0	3	3	0	0	6
AACAGAACTGAACTG/CAGTTCAGTTCTGTT	0	0	49	41	5	0	0	90	5
ACCTCCGTAGCC/GGCTACGGAGGT	0	0	5	0	5	0	0	5	5
AAAAAACAAACAAC/GTTGTTTGTTTTTT	0	0	0	0	0	5	0	0	5
AAAAAGAAATAG/CTATTTCTTTTT	0	0	0	0	5	0	0	0	5
AAAACAACAAACAAC/GTTGTTTGTTGTTTT	0	0	0	0	5	0	0	0	5
ACTATATATAT/ATATATATAGT	0	0	0	0	5	0	0	0	5
AAATGAACATGTTCG/CGAACATGTTCATTT	0	0	432	340	0	4	0	772	4
AACAGAACAGAAGAGAACAT/ATGTTCTCTTCTGTTCTGTT	0	0	131	61	4	0	0	192	4
AACATGTTCAGTTCG/CGAACTGAACATGTT	0	0	4	8	0	4	0	12	4
AAAAAGAACATGTTC/GAACATGTTCTTTTT	0	0	0	0	0	4	0	0	4
AAAAATAATAATAAT/ATTATTATTATTTTT	0	0	0	0	4	0	0	0	4
AAAAGAACATAATCG/CGATTATGTTCTTTT	0	0	0	0	4	0	0	0	4
AAACAACAAACAAT/ATTGTTTGTTGTTT	0	0	0	0	4	0	0	0	4
AAACAACAAGCAAC/GTTGCTTGTTGTTT	0	0	0	0	0	4	0	0	4
AAATAATACAAATAC/GTATTTGTATTATTT	0	0	0	0	0	4	0	0	4
AAATAATATATAATATAT/ATATATTATATATTATTT	0	0	0	0	4	0	0	0	4
AAATATACATGTAG/CTACATGTATATTT	0	0	0	0	4	0	0	0	4
AAATTATATATTAT/ATAATATATAATTT	0	0	0	0	4	0	0	0	4
AACACGTCCTGTTCG/CGAACAGGACGTGTT	0	0	0	0	0	4	0	0	4
AACAGAACAGGACAG/CTGTCCTGTTCTGTT	0	0	0	0	0	4	0	0	4
AACAGAAGATGTTCG/CGAACATCTTCTGTT	0	0	0	0	4	0	0	0	4
AACTGTCCCGCCGCCAGC/GCTGGCGGCGGGACAGTT	0	0	0	0	0	4	0	0	4
AAGAGAAGAGAAGAG/CTCTTCTCTTCTCTT	0	0	0	0	4	0	0	0	4
AAGGAGGAGATCCAG/CTGGATCTCCTCCTT	0	0	0	0	0	4	0	0	4
AATATAATATACTAT/ATAGTATATTATATT	0	0	0	0	4	0	0	0	4
AATATAATATAGTAT/ATACTATATTATATT	0	0	0	0	0	4	0	0	4
AATATAATATCATAT/ATATGATATTATATT	0	0	0	0	0	4	0	0	4
AATATATAATATCT/AGATATTATATATT	0	0	0	0	0	4	0	0	4
AATATATATTATAT/ATATAATATATATT	0	0	0	0	4	0	0	0	4
AACATCAACGCTGCAGC/GCTGCAGCGTTGATGTT	0	0	96	63	0	3	0	159	3
AGATATATAGATATATAT/ATATATATCTATATATCT	0	0	52	44	3	0	0	96	3
AAAATAATATAATATAATAT/ATATTATATTATATTATTTT	0	0	21	34	0	3	0	55	3
AATATATATATATATAT/ATATATATATATATATT	0	0	0	3	0	3	0	3	3
AAAAAAAAAAAAAAAAAC/GTTTTTTTTTTTTTTTTT	0	0	0	0	3	0	0	0	3
AAAAAAAGAGAAGAGAAGAG/CTCTTCTCTTCTCTTTTTTT	0	0	0	0	3	0	0	0	3
AAAAAACAAAAAACAAC/GTTGTTTTTTGTTTTTT	0	0	0	0	0	3	0	0	3
AAAAAACAACAAACAACAAC/GTTGTTGTTTGTTGTTTTTT	0	0	0	0	3	0	0	0	3
AAAAAACAACAAATAACAAC/GTTGTTATTTGTTGTTTTTT	0	0	0	0	3	0	0	0	3
AAAACAGAATAAAATAGAAT/ATTCTATTTTATTCTGTTTT	0	0	0	0	0	3	0	0	3
AAAAGAAAAGAGAAAAGAG/CTCTTTTCTCTTTTCTTTT	0	0	0	0	3	0	0	0	3
AAAAGAAAATAGAAAATAG/CTATTTTCTATTTTCTTTT	0	0	0	0	3	0	0	0	3
AAAATAGAAGAGAATAGAAG/CTTCTATTCTCTTCTATTTT	0	0	0	0	0	3	0	0	3
AAAATATATTATAATATAAT/ATTATATTATAATATATTTT	0	0	0	0	3	0	0	0	3
AAACAAACAATAAACAAT/ATTGTTTATTGTTTGTTT	0	0	0	0	0	3	0	0	3
AAACAACAACAATCAACAAC/GTTGTTGATTGTTGTTGTTT	0	0	0	0	0	3	0	0	3
AAACAACAATCAACAAC/GTTGTTGATTGTTGTTT	0	0	0	0	0	3	0	0	3
AAAGAGAAAGAGAAGAG/CTCTTCTCTTTCTCTTT	0	0	0	0	3	0	0	0	3
AAATAGAATTGAATAGAATT/AATTCTATTCAATTCTATTT	0	0	0	0	3	0	0	0	3
AAATATAAGAATATTATAT/ATATAATATTCTTATATTT	0	0	0	0	0	3	0	0	3
AAATTCTATTATATTCTATT/AATAGAATATAATAGAATTT	0	0	0	0	3	0	0	0	3
AAATTCTATTCAATTCTATT/AATAGAATTGAATAGAATTT	0	0	0	0	0	3	0	0	3
AAATTGTTCTGTTCTGTTCG/CGAACAGAACAGAACAATTT	0	0	0	0	0	3	0	0	3
AACAACAATCAACAATC/GATTGTTGATTGTTGTT	0	0	0	0	0	3	0	0	3
AACAGAACAGAACATGTTAG/CTAACATGTTCTGTTCTGTT	0	0	0	0	0	3	0	0	3
AACAGAACAGGACAGGACAG/CTGTCCTGTCCTGTTCTGTT	0	0	0	0	0	3	0	0	3
AACAGAAGAGAACATGTTCG/CGAACATGTTCTCTTCTGTT	0	0	0	0	0	3	0	0	3
AACAGGACAGGACAGGACAG/CTGTCCTGTCCTGTCCTGTT	0	0	0	0	3	0	0	0	3
AACAGTCGCAGCAGTTCC/GGAACTGCTGCGACTGTT	0	0	0	0	3	0	0	0	3
AACATAATTATACAATGCAG/CTGCATTGTATAATTATGTT	0	0	0	0	0	3	0	0	3
AACTGAATAGAATTGAATAG/CTATTCAATTCTATTCAGTT	0	0	0	0	0	3	0	0	3
AAGAAGACGAGAAGAGG/CCTCTTCTCGTCTTCTT	0	0	0	0	3	0	0	0	3
AAGAGAAGAGAAGAGAGGAG/CTCCTCTCTTCTCTTCTCTT	0	0	0	0	0	3	0	0	3
AAGAGAATACAAGAGAATAG/CTATTCTCTTGTATTCTCTT	0	0	0	0	0	3	0	0	3
AAGAGAATAGAAGAGAATGG/CCATTCTCTTCTATTCTCTT	0	0	0	0	0	3	0	0	3
AATAGAATAGAATAGAATCG/CGATTCTATTCTATTCTATT	0	0	0	0	0	3	0	0	3
AATAGAATCGAATCGAATCG/CGATTCGATTCGATTCTATT	0	0	0	0	3	0	0	0	3
AATAGAATTGAATAGCATTG/CAATGCTATTCAATTCTATT	0	0	0	0	3	0	0	0	3
AATATAATATTATATTAT/ATAATATAATATTATATT	0	0	0	0	0	3	0	0	3
ACAGCAGCTAGCTCCTCC/GGAGGAGCTAGCTGCTGT	0	0	0	0	0	3	0	0	3
ACATCTAT/ATAGATGT	0	0	3242	2913	0	0	0	6155	0
ACAGT/ACTGT	0	0	1923	1842	0	0	0	3765	0
AAATTAAC/GTTAATTT	0	0	1072	961	0	0	0	2033	0
AAAAGAAAAGAATAGAATAG/CTATTCTATTCTTTTCTTTT	0	0	975	1038	0	0	0	2013	0
AAACCGAACATGTTC/GAACATGTTCGGTTT	0	0	512	435	0	0	0	947	0
AACAGAACAGAACAGAATAG/CTATTCTGTTCTGTTCTGTT	0	0	509	438	0	0	0	947	0
AAAAGAAAAGAAAAGAATAG/CTATTCTTTTCTTTTCTTTT	0	0	365	330	0	0	0	695	0
AACAGAACATGTCCG/CGGACATGTTCTGTT	0	0	452	232	0	0	0	684	0
AACACAT/ATGTGTT	0	0	324	359	0	0	0	683	0
AAGTGT/ACACTT	0	0	229	448	0	0	0	677	0
AACGGGACCAG/CTGGTCCCGTT	0	0	444	228	0	0	0	672	0
AAAACAAAACAAAACAC/GTGTTTTGTTTTGTTTT	0	0	365	249	0	0	0	614	0
AAATCGGTCCCG/CGGGACCGATTT	0	0	396	210	0	0	0	606	0
AAAAAACAAAACAAAAC/GTTTTGTTTTGTTTTTT	0	0	301	294	0	0	0	595	0
AAATAGC/GCTATTT	0	0	260	260	0	0	0	520	0
AAATGTAAATGTAAATGTGT/ACACATTTACATTTACATTT	0	0	286	224	0	0	0	510	0
AAAACAAAACC/GGTTTTGTTTT	0	0	261	235	0	0	0	496	0
AAAACAAAACAAC/GTTGTTTTGTTTT	0	0	302	172	0	0	0	474	0
AATAATATATAATAT/ATATTATATATTATT	0	0	241	206	0	0	0	447	0
AATATAATATATAT/ATATATATTATATT	0	0	235	203	0	0	0	438	0
AAAACAC/GTGTTTT	0	0	237	172	0	0	0	409	0
AAAAGAACAGAACATGTTCG/CGAACATGTTCTGTTCTTTT	0	0	204	204	0	0	0	408	0
AACACAG/CTGTGTT	0	0	121	243	0	0	0	364	0
ACTAGGG/CCCTAGT	0	0	246	94	0	0	0	340	0
AAAAATCACTTG/CAAGTGATTTTT	0	0	154	171	0	0	0	325	0
AAAAGTATTCAT/ATGAATACTTTT	0	0	156	165	0	0	0	321	0
AACATGTTCGGACAG/CTGTCCGAACATGTT	0	0	156	163	0	0	0	319	0
AATCAGTAGT/ACTACTGATT	0	0	157	156	0	0	0	313	0
AAAATTATTATTTATTAAT/ATTAATAAATAATAATTTT	0	0	174	134	0	0	0	308	0
AAATGTAC/GTACATTT	0	0	140	148	0	0	0	288	0
AAATACATAATACAT/ATGTATTATGTATTT	0	0	152	120	0	0	0	272	0
AAAACACAAC/GTTGTGTTTT	0	0	192	78	0	0	0	270	0
ACACCTCAT/ATGAGGTGT	0	0	141	122	0	0	0	263	0
AACATGTTCATACAG/CTGTATGAACATGTT	0	0	150	108	0	0	0	258	0
AACAGAAGAGAAGAG/CTCTTCTCTTCTGTT	0	0	162	87	0	0	0	249	0
AATATGGTAT/ATACCATATT	0	0	139	94	0	0	0	233	0
ACACCAT/ATGGTGT	0	0	127	101	0	0	0	228	0
AACAGAACAGG/CCTGTTCTGTT	0	0	127	89	0	0	0	216	0
ATATCC/GGATAT	0	0	172	40	0	0	0	212	0
AAACATGTTCGAACG/CGTTCGAACATGTTT	0	0	120	88	0	0	0	208	0
AAATATTATAATATAT/ATATATTATAATATTT	0	0	132	72	0	0	0	204	0
AACACGTTCTGTTCTGTTCG/CGAACAGAACAGAACGTGTT	0	0	123	81	0	0	0	204	0
AAAAAAAAAC/GTTTTTTTTT	0	0	141	59	0	0	0	200	0
AGAGATAGATAGAT/ATCTATCTATCTCT	0	0	100	96	0	0	0	196	0
AAGTAT/ATACTT	0	0	110	84	0	0	0	194	0
AAATGGT/ACCATTT	0	0	120	72	0	0	0	192	0
AACATT/AATGTT	0	0	81	108	0	0	0	189	0
ACATACGT/ACGTATGT	0	0	70	119	0	0	0	189	0
AGCATCAGCGGC/GCCGCTGATGCT	0	0	153	20	0	0	0	173	0
AAATATATCTAT/ATAGATATATTT	0	0	127	41	0	0	0	168	0
AAAATTAAAT/ATTTAATTTT	0	0	80	78	0	0	0	158	0
AATATCTGT/ACAGATATT	0	0	92	52	0	0	0	144	0
AATTGAC/GTCAATT	0	0	72	61	0	0	0	133	0
AACATGTTCGAGCCC/GGGCTCGAACATGTT	0	0	64	68	0	0	0	132	0
AAAGCAGCAACAGC/GCTGTTGCTGCTTT	0	0	76	52	0	0	0	128	0
AATATATTAT/ATAATATATT	0	0	52	70	0	0	0	122	0
AAAATAC/GTATTTT	0	0	44	77	0	0	0	121	0
AAAACATGTTCTGTT/AACAGAACATGTTTT	0	0	68	52	0	0	0	120	0
AAAACATAAC/GTTATGTTTT	0	0	62	57	0	0	0	119	0
AACAGAACAT/ATGTTCTGTT	0	0	64	54	0	0	0	118	0
ACGATGG/CCATCGT	0	0	92	23	0	0	0	115	0
AACAGTACTGTACTGCTCG/CGAGCAGTACAGTACTGTT	0	0	81	33	0	0	0	114	0
AAAACAAAACAAAACC/GGTTTTGTTTTGTTTT	0	0	62	43	0	0	0	105	0
AAGCAGCATGAGCAGGAT/ATCCTGCTCATGCTGCTT	0	0	45	54	0	0	0	99	0
AATATAATTAGAATATAG/CTATATTCTAATTATATT	0	0	51	48	0	0	0	99	0
AAACCTACGGAC/GTCCGTAGGTTT	0	0	65	25	0	0	0	90	0
AAATACGGGACC/GGTCCCGTATTT	0	0	46	41	0	0	0	87	0
AATAATAATTAT/ATAATTATTATT	0	0	48	38	0	0	0	86	0
ACCACCAGGGCCACCTGG/CCAGGTGGCCCTGGTGGT	0	0	42	42	0	0	0	84	0
AACGG/CCGTT	0	0	63	19	0	0	0	82	0
AAAACAGAAC/GTTCTGTTTT	0	0	53	24	0	0	0	77	0
ACCCAT/ATGGGT	0	0	38	39	0	0	0	77	0
AAAAAACAAAAAACAAAAC/GTTTTGTTTTTTGTTTTTT	0	0	44	30	0	0	0	74	0
AACAGGATCGGTTCG/CGAACCGATCCTGTT	0	0	44	24	0	0	0	68	0
AAATGTGT/ACACATTT	0	0	17	49	0	0	0	66	0
AACAGAAGAGAAGAGAAGAG/CTCTTCTCTTCTCTTCTGTT	0	0	21	45	0	0	0	66	0
ACCATATAT/ATATATGGT	0	0	36	30	0	0	0	66	0
AAAAAAAATAT/ATATTTTTTTT	0	0	30	35	0	0	0	65	0
AACATATTCTGTACG/CGTACAGAATATGTT	0	0	40	24	0	0	0	64	0
AACAGTACAGAACATGTTCG/CGAACATGTTCTGTACTGTT	0	0	42	21	0	0	0	63	0
AAACAGAACATGTCC/GGACATGTTCTGTTT	0	0	20	40	0	0	0	60	0
AAACATGTTCTGTTCTGTTC/GAACAGAACAGAACATGTTT	0	0	21	39	0	0	0	60	0
ACCTCCTCTCTCC/GGAGAGAGGAGGT	0	0	36	24	0	0	0	60	0
AAAAAAAAACAAAAC/GTTTTGTTTTTTTTT	0	0	34	25	0	0	0	59	0
AACAGTACTG/CAGTACTGTT	0	0	22	36	0	0	0	58	0
ACCGACTGCGGG/CCCGCAGTCGGT	0	0	5	52	0	0	0	57	0
AACATGTTCGACAG/CTGTCGAACATGTT	0	0	48	8	0	0	0	56	0
AATAATATAATATAATAT/ATATTATATTATATTATT	0	0	32	24	0	0	0	56	0
AAAACAAAACACAAAACAC/GTGTTTTGTGTTTTGTTTT	0	0	31	23	0	0	0	54	0
AACAGACCATGTTCG/CGAACATGGTCTGTT	0	0	41	12	0	0	0	53	0
AACACAC/GTGTGTT	0	0	34	18	0	0	0	52	0
AACAGAACAGAATATGTTCG/CGAACATATTCTGTTCTGTT	0	0	27	24	0	0	0	51	0
AACCAGGGATTCGGAGGC/GCCTCCGAATCCCTGGTT	0	0	39	12	0	0	0	51	0
AACAGAACAGAACCG/CGGTTCTGTTCTGTT	0	0	39	11	0	0	0	50	0
AATATATACATATATATAT/ATATATATATGTATATATT	0	0	27	21	0	0	0	48	0
ACCTCCAGTACGGG/CCCGTACTGGAGGT	0	0	36	12	0	0	0	48	0
AAATATAATATAATATAT/ATATATTATATTATATTT	0	0	24	23	0	0	0	47	0
AAAATAAAATAAAATATAAT/ATTATATTTTATTTTATTTT	0	0	21	24	0	0	0	45	0
AAAGCCACCAAC/GTTGGTGGCTTT	0	0	35	10	0	0	0	45	0
AAGGTGGATTCGGAGGAC/GTCCTCCGAATCCACCTT	0	0	30	15	0	0	0	45	0
AATATATATAATATATATAT/ATATATATATTATATATATT	0	0	18	27	0	0	0	45	0
AAATATGTAAATGTAAATGT/ACATTTACATTTACATATTT	0	0	24	19	0	0	0	43	0
AACAGAACAGAAGAGAAGAG/CTCTTCTCTTCTGTTCTGTT	0	0	33	10	0	0	0	43	0
AAGGTGGACCCC/GGGGTCCACCTT	0	0	38	5	0	0	0	43	0
AACAACGAATAC/GTATTCGTTGTT	0	0	40	0	0	0	0	40	0
AATCAGTGCTGTCACAGC/GCTGTGACAGCACTGATT	0	0	33	6	0	0	0	39	0
AAAACAAAACAAAACAAC/GTTGTTTTGTTTTGTTTT	0	0	12	26	0	0	0	38	0
AACACGAGCGAACAG/CTGTTCGCTCGTGTT	0	0	32	4	0	0	0	36	0
ACCTGCTCC/GGAGCAGGT	0	0	18	18	0	0	0	36	0
ACAGTGGGACCG/CGGTCCCACTGT	0	0	29	6	0	0	0	35	0
ACCAGCTC/GAGCTGGT	0	0	21	14	0	0	0	35	0
AGATGGAT/ATCCATCT	0	0	21	14	0	0	0	35	0
AACACAACAG/CTGTTGTGTT	0	0	21	12	0	0	0	33	0
AACAGAACAGAACATGGTCG/CGACCATGTTCTGTTCTGTT	0	0	24	9	0	0	0	33	0
AAAACACATAAC/GTTATGTGTTTT	0	0	15	15	0	0	0	30	0
ACACACAGGC/GCCTGTGTGT	0	0	18	12	0	0	0	30	0
AAAACACAACAC/GTGTTGTGTTTT	0	0	23	6	0	0	0	29	0
AAATAGAATAGAATAG/CTATTCTATTCTATTT	0	0	10	19	0	0	0	29	0
AACAGACCAG/CTGGTCTGTT	0	0	14	15	0	0	0	29	0
AAAACAAAACACAACAC/GTGTTGTGTTTTGTTTT	0	0	23	3	0	0	0	26	0
AAAACAAAACAACAAAC/GTTTGTTGTTTTGTTTT	0	0	16	9	0	0	0	25	0
AACATGATCG/CGATCATGTT	0	0	25	0	0	0	0	25	0
AAAATGTTCTGTTTG/CAAACAGAACATTTT	0	0	12	12	0	0	0	24	0
ACATATATAT/ATATATATGT	0	0	12	12	0	0	0	24	0
AACAGTACAGTACAG/CTGTACTGTACTGTT	0	0	18	4	0	0	0	22	0
AATATAATATAATATTATAT/ATATAATATTATATTATATT	0	0	6	15	0	0	0	21	0
AGATGCAGCAGCGCCAGG/CCTGGCGCTGCTGCATCT	0	0	18	3	0	0	0	21	0
AAGTGGTGATGACGG/CCGTCATCACCACTT	0	0	12	8	0	0	0	20	0
ATCCCCATCCGC/GCGGATGGGGAT	0	0	20	0	0	0	0	20	0
AAAAGAATAGAAAAGTATAG/CTATACTTTTCTATTCTTTT	0	0	13	6	0	0	0	19	0
AAAAAAAAACAAAACAAAAC/GTTTTGTTTTGTTTTTTTTT	0	0	12	6	0	0	0	18	0
AAAAAGATTTATTTAAT/ATTAAATAAATCTTTTT	0	0	6	12	0	0	0	18	0
AACCCAGCCCCATCCCCAT/ATGGGGATGGGGCTGGGTT	0	0	6	12	0	0	0	18	0
AACAGAACAGAACAGAAGAG/CTCTTCTGTTCTGTTCTGTT	0	0	8	8	0	0	0	16	0
AACAGAACAGAACAGTACAG/CTGTACTGTTCTGTTCTGTT	0	0	3	13	0	0	0	16	0
AACAGAACAGAACTG/CAGTTCTGTTCTGTT	0	0	16	0	0	0	0	16	0
AAAAAAAAAAAAAAAAC/GTTTTTTTTTTTTTTTT	0	0	6	9	0	0	0	15	0
AAAACAATACAC/GTGTATTGTTTT	0	0	10	5	0	0	0	15	0
AAATAGAATAG/CTATTCTATTT	0	0	15	0	0	0	0	15	0
AATATATAATATATTAT/ATAATATATTATATATT	0	0	3	12	0	0	0	15	0
AACAGAACAGTACAG/CTGTACTGTTCTGTT	0	0	4	10	0	0	0	14	0
ACCGCCAGTACGGG/CCCGTACTGGCGGT	0	0	9	4	0	0	0	13	0
AAAAAAAAAT/ATTTTTTTTT	0	0	12	0	0	0	0	12	0
AAACGGACAGACGGAC/GTCCGTCTGTCCGTTT	0	0	12	0	0	0	0	12	0
AACAGAACATGTTCGAATCG/CGATTCGAACATGTTCTGTT	0	0	12	0	0	0	0	12	0
AATAATAGAATAGAATAG/CTATTCTATTCTATTATT	0	0	0	12	0	0	0	12	0
ACCGTGCTC/GAGCACGGT	0	0	12	0	0	0	0	12	0
AGATATATAT/ATATATATCT	0	0	12	0	0	0	0	12	0
AATACTAATACTACT/AGTAGTATTAGTATT	0	0	10	0	0	0	0	10	0
ACTCCTCCGGCC/GGCCGGAGGAGT	0	0	10	0	0	0	0	10	0
AAAAAAAAAAAAAAAAAAAC/GTTTTTTTTTTTTTTTTTTT	0	0	9	0	0	0	0	9	0
AACAGCAGCAGCAGCAGC/GCTGCTGCTGCTGCTGTT	0	0	6	3	0	0	0	9	0
AAGGAC/GTCCTT	0	0	0	9	0	0	0	9	0
AATATAATATAATATGGTAT/ATACCATATTATATTATATT	0	0	9	0	0	0	0	9	0
AATTAT/ATAATT	0	0	0	9	0	0	0	9	0
ACACCC/GGGTGT	0	0	9	0	0	0	0	9	0
ACCACCC/GGGTGGT	0	0	0	9	0	0	0	9	0
ATCCCC/GGGGAT	0	0	0	9	0	0	0	9	0
ATCCCG/CGGGAT	0	0	9	0	0	0	0	9	0
AAAAAGG/CCTTTTT	0	0	0	8	0	0	0	8	0
AAAACAAAACAAAAG/CTTTTGTTTTGTTTT	0	0	4	4	0	0	0	8	0
AAAACAACAAAC/GTTTGTTGTTTT	0	0	8	0	0	0	0	8	0
AAAATGG/CCATTTT	0	0	0	8	0	0	0	8	0
AATATAATGTAATGT/ACATTACATTATATT	0	0	0	8	0	0	0	8	0
AATCCTGGTCCGCCG/CGGCGGACCAGGATT	0	0	8	0	0	0	0	8	0
ACATATATATATAT/ATATATATATATGT	0	0	8	0	0	0	0	8	0
AAATATATAAATATTAT/ATAATATTTATATATTT	0	0	4	3	0	0	0	7	0
AATATAATCT/AGATTATATT	0	0	0	7	0	0	0	7	0
ACACACCC/GGGTGTGT	0	0	7	0	0	0	0	7	0
AAAAAAAAAAAAAACAAAAC/GTTTTGTTTTTTTTTTTTTT	0	0	3	3	0	0	0	6	0
AAAAAAAAAAAC/GTTTTTTTTTTT	0	0	6	0	0	0	0	6	0
AAAAAAAAAAACAAAAC/GTTTTGTTTTTTTTTTT	0	0	6	0	0	0	0	6	0
AAAAAAAAATAAAATAAAAT/ATTTTATTTTATTTTTTTTT	0	0	6	0	0	0	0	6	0
AAAAAAAAC/GTTTTTTTT	0	0	0	6	0	0	0	6	0
AAAACAAAAG/CTTTTGTTTT	0	0	6	0	0	0	0	6	0
AAAATAATATAATAATAT/ATATTATTATATTATTTT	0	0	0	6	0	0	0	6	0
AAACGAATAG/CTATTCGTTT	0	0	0	6	0	0	0	6	0
AACAACAGAACAGAACAG/CTGTTCTGTTCTGTTGTT	0	0	3	3	0	0	0	6	0
AACAGAACAGAACTGAACTG/CAGTTCAGTTCTGTTCTGTT	0	0	6	0	0	0	0	6	0
AATAATATATATATATAT/ATATATATATATATTATT	0	0	3	3	0	0	0	6	0
AATACTACT/AGTAGTATT	0	0	0	6	0	0	0	6	0
AATAGAATAGG/CCTATTCTATT	0	0	6	0	0	0	0	6	0
AATATAATATAATATATAT/ATATATATTATATTATATT	0	0	3	3	0	0	0	6	0
AATATAATATAATATATTAT/ATAATATATTATATTATATT	0	0	3	3	0	0	0	6	0
AATATAATATAATGTAATGT/ACATTACATTATATTATATT	0	0	3	3	0	0	0	6	0
AAAAAATAAAATAT/ATATTTTATTTTTT	0	0	0	5	0	0	0	5	0
AATAGAATAGAATAGG/CCTATTCTATTCTATT	0	0	0	5	0	0	0	5	0
ACACACACACCC/GGGTGTGTGTGT	0	0	5	0	0	0	0	5	0
ACCGGTACGGG/CCCGTACCGGT	0	0	5	0	0	0	0	5	0
AAAAAAAAAAAAAAC/GTTTTTTTTTTTTTT	0	0	4	0	0	0	0	4	0
AAAAAAAAAAAAAAT/ATTTTTTTTTTTTTT	0	0	4	0	0	0	0	4	0
AAAAAATATAAAAT/ATTTTATATTTTTT	0	0	4	0	0	0	0	4	0
AAAACAAAACACAAC/GTTGTGTTTTGTTTT	0	0	4	0	0	0	0	4	0
AAAAGAAAAGAACAG/CTGTTCTTTTCTTTT	0	0	4	0	0	0	0	4	0
AAAAGAACAGAACAG/CTGTTCTGTTCTTTT	0	0	4	0	0	0	0	4	0
AAAAGAATAGAACAG/CTGTTCTATTCTTTT	0	0	4	0	0	0	0	4	0
AAAATAATAATATAAT/ATTATATTATTATTTT	0	0	4	0	0	0	0	4	0
AAAATATCAAATAT/ATATTTGATATTTT	0	0	0	4	0	0	0	4	0
AAACATGTTCTGTTCG/CGAACAGAACATGTTT	0	0	4	0	0	0	0	4	0
AAATAACAATTAAC/GTTAATTGTTATTT	0	0	0	4	0	0	0	4	0
AACAGAACAGGTTCG/CGAACCTGTTCTGTT	0	0	4	0	0	0	0	4	0
AACAGAACATGAGCG/CGCTCATGTTCTGTT	0	0	4	0	0	0	0	4	0
AACATAATATAATAT/ATATTATATTATGTT	0	0	4	0	0	0	0	4	0
AAGGAGGAGCCCGCC/GGCGGGCTCCTCCTT	0	0	4	0	0	0	0	4	0
AATAATAGAATAG/CTATTCTATTATT	0	0	4	0	0	0	0	4	0
AATAATATAATAATCT/AGATTATTATATTATT	0	0	0	4	0	0	0	4	0
AATAATATAATATAT/ATATATTATATTATT	0	0	0	4	0	0	0	4	0
ACTAGGACTAGGG/CCCTAGTCCTAGT	0	0	4	0	0	0	0	4	0
AAAAAAAAAAAAAAAAAAC/GTTTTTTTTTTTTTTTTTT	0	0	3	0	0	0	0	3	0
AAAAAAAAAAAGAAGAGG/CCTCTTCTTTTTTTTTTT	0	0	3	0	0	0	0	3	0
AAAAAAAAAATTTTTTTTT/AAAAAAAAATTTTTTTTTT	0	0	3	0	0	0	0	3	0
AAAAAAAAACAAAACAAC/GTTGTTTTGTTTTTTTTT	0	0	0	3	0	0	0	3	0
AAAAAAAAATAAAAAAAT/ATTTTTTTATTTTTTTTT	0	0	0	3	0	0	0	3	0
AAAAATAATAATAATAAT/ATTATTATTATTATTTTT	0	0	0	3	0	0	0	3	0
AAAACAAAACAAAACACAAC/GTTGTGTTTTGTTTTGTTTT	0	0	0	3	0	0	0	3	0
AAAAGAATAGAATGGAATAG/CTATTCCATTCTATTCTTTT	0	0	3	0	0	0	0	3	0
AAAGATAGATAGATAGATAG/CTATCTATCTATCTATCTTT	0	0	3	0	0	0	0	3	0
AAATAGATAGATAGATAGAT/ATCTATCTATCTATCTATTT	0	0	3	0	0	0	0	3	0
AAATGATGCAGCAACAGC/GCTGTTGCTGCATCATTT	0	0	3	0	0	0	0	3	0
AACAACCACAACTACGAC/GTCGTAGTTGTGGTTGTT	0	0	3	0	0	0	0	3	0
AACACAGCACAGAACAG/CTGTTCTGTGCTGTGTT	0	0	3	0	0	0	0	3	0
AACAGAACAGAACAGAACCG/CGGTTCTGTTCTGTTCTGTT	0	0	0	3	0	0	0	3	0
AACAGAATATGTTCGAATAG/CTATTCGAACATATTCTGTT	0	0	0	3	0	0	0	3	0
AACATAATATAATATAATAT/ATATTATATTATATTATGTT	0	0	3	0	0	0	0	3	0
AACATAATATAATATAGTAT/ATACTATATTATATTATGTT	0	0	0	3	0	0	0	3	0
AACCCAGCCACCGCCGCC/GGCGGCGGTGGCTGGGTT	0	0	3	0	0	0	0	3	0
AATAGAATAGAATAGAG/CTCTATTCTATTCTATT	0	0	0	3	0	0	0	3	0
AATATAATATAATATAGTAG/CTACTATATTATATTATATT	0	0	3	0	0	0	0	3	0
AATATAATATAATATGAT/ATCATATTATATTATATT	0	0	0	3	0	0	0	3	0

## Sheet: mau_Y_assembly
mau_Contig	Y_Contig101	Y_Contig109	Y_Contig135	Y_Contig136	Y_Contig15	Y_Contig3	Y_Contig33	Y_Contig72	Y_Contig86	Y_Contig97	Y_Contig98	Y_scaffold1	Y_scaffold2	Y_scaffold3	Y_scaffold4
AATATAT	0	0	0	0	0	0	0	0	0	0	0	32062	4758	0	0
AAT	569	0	0	0	0	206	0	0	0	0	2918	13050	0	8495	12332
AATAT	0	141	208	0	0	0	0	0	0	0	0	9045	960	2595	4035
AATTAAC	0	0	0	16654	0	0	0	0	0	12769	0	8063	0	0	0
ATATATAG	0	0	0	0	0	0	0	0	0	0	0	8046	1263	0	0
AAACAT	0	0	0	0	0	0	0	0	0	0	0	7496	0	0	0
AAGAG	0	0	0	0	0	0	0	0	0	0	0	4769	0	0	0
AT	0	0	0	0	0	0	0	0	0	0	0	3161	141	0	0
AACATGTTCTGTTCG	0	0	0	0	0	0	3363	24288	19541	0	0	2856	462	0	0
AATCAAC	0	0	0	0	0	0	0	0	0	0	0	2592	0	0	0
AATCTC	0	0	0	0	0	0	0	0	0	0	0	2086	0	0	0
ACTCGGTCCCGT	0	0	0	0	0	17836	4367	0	0	0	0	1230	0	0	0
AAACAAC	0	0	0	0	0	0	0	0	0	161	0	1182	0	0	0
A	0	0	0	0	0	0	0	0	0	0	0	632	0	0	0
ATATATATAT	0	0	0	0	0	0	0	0	0	0	0	563	0	0	0
AAACAGTTAGTG	0	0	0	0	0	0	0	0	0	0	0	444	244	0	1716
AAAATTAC	0	0	0	0	0	0	0	0	0	0	0	432	0	0	0
AAATGT	0	0	0	0	0	0	0	0	0	0	0	269	0	0	0
AAAATTTACATTT	0	0	0	0	0	0	0	0	0	0	0	254	0	0	0
AATATATGTAGATGT	0	0	0	0	0	0	0	0	0	0	0	148	0	0	157
AAAATGAGAGAAG	141	0	0	0	140	0	0	0	0	0	0	141	141	141	141
AAAAAAAAAT	0	0	0	0	0	0	0	0	0	0	0	124	0	0	0
AAAATG	0	0	0	0	0	0	0	0	0	0	0	0	6442	0	0
AAAATATATAAT	0	0	0	0	0	0	0	0	0	0	0	0	961	0	0
AAAATGTAT	0	0	0	0	0	0	0	0	0	0	0	0	330	0	0
AAATGTATATG	0	0	0	0	0	0	0	0	0	0	0	0	295	0	0
ATAGTACAG	0	0	0	0	0	0	0	0	0	0	0	0	0	0	10330
AATAAT	0	0	0	0	0	0	0	0	0	0	0	0	0	0	693
ATATACTACATCTAC	0	0	0	0	0	0	0	0	0	0	0	0	0	0	298
AATATATGTTGATGT	0	0	0	0	0	0	0	0	0	0	0	0	0	0	178
AAGTATACAC	0	0	0	0	0	0	0	0	0	0	0	0	0	0	165
AATAATATAT	0	0	0	0	0	0	0	0	0	0	0	0	0	0	153
AATAC	0	0	0	0	0	0	0	0	0	0	0	0	0	928	0
AAAATGAGAAAAG	0	0	0	0	0	0	0	0	0	0	0	0	0	275	0
AATCGGGAGTCTG	0	0	0	0	0	0	0	0	0	0	0	0	0	131	0
AGCCGG	0	0	0	0	0	0	0	0	0	0	0	0	0	107	0
AATGAT	0	0	0	0	0	0	0	0	0	0	3777	0	0	0	0
AAACAACAATCAAC	0	0	0	0	0	0	0	0	0	271	0	0	0	0	0
AATAATAATAATAT	0	0	0	0	0	208	0	0	0	0	0	0	0	0	0

## Sheet: sim_Y_assembly
sim_Contig	Y_Contig_1	Y_Contig_100	Y_Contig_11	Y_Contig_126	Y_Contig_13	Y_Contig_135	Y_Contig_138	Y_Contig_16	Y_Contig_36	Y_Contig_92	Y_Contig_94	Y_scaffold1	Y_scaffold2	Y_scaffold3	Y_scaffold4	Y_scaffold5
AACATGTTCTGTTCG	0	0	0	0	0	0	0	0	0	0	0	42430	0	1494	0	0
AATAGT	0	0	0	0	0	5662	0	0	0	0	0	21027	0	0	0	0
ATCTCATCTCTC	0	0	0	0	0	0	0	0	0	0	0	8632	0	0	0	0
ATCTCATCTCATCTC	0	0	0	0	0	0	0	0	0	0	0	8630	0	0	0	0
ATCTC	0	0	0	0	0	0	0	0	0	0	0	8630	0	0	0	0
AAT	0	0	12544	0	0	46008	0	12077	0	0	0	353	0	0	0	0
AATAATATAT	0	0	0	0	0	0	0	0	0	0	0	186	0	0	0	0
AATAT	0	6900	0	2924	8260	0	0	0	4345	9313	0	166	21485	12988	2913	6406
AT	0	0	0	0	0	539	0	0	0	0	0	165	21961	0	3798	0
AAACAGTTAGTG	136	0	0	0	0	169	0	0	0	0	0	148	160	0	0	338
AATATAT	0	0	0	0	0	0	0	0	0	0	0	0	37939	0	7147	0
AATTAAC	0	0	0	0	0	0	0	0	0	0	0	0	20739	0	0	0
AAACAATAAACAAT	0	0	0	0	0	0	0	0	0	0	0	0	20719	0	0	0
ATAT	0	0	0	0	0	0	0	0	0	0	0	0	15941	0	0	0
AAACAAC	0	0	0	0	0	0	0	0	0	0	0	0	6150	0	0	0
AAAATTAC	0	0	0	0	0	0	0	0	0	0	0	0	1467	0	0	0
ATATATAG	0	0	0	0	0	0	37108	0	0	0	0	0	1251	0	21075	0
AACGGTCCCG	0	0	0	0	0	0	0	0	0	0	0	0	158	0	0	0
AAAATTTACATTT	0	0	0	0	0	0	0	0	0	0	0	0	130	0	0	0
AATAG	0	0	0	0	0	0	0	0	0	0	0	0	0	25355	0	0
AATATATGTAGATGT	0	0	0	0	0	0	0	0	0	0	0	0	0	154	0	0
AAGAG	0	0	0	323	0	0	0	0	0	0	0	0	0	0	13054	0
AAATGTATG	0	0	0	0	0	0	0	0	0	0	0	0	0	0	5662	0
ATATATATATAG	0	0	0	0	0	0	0	0	0	0	0	0	0	0	5461	0
ATATATAT	0	0	0	0	0	0	0	0	0	0	0	0	0	0	5287	0
AAATGT	0	0	0	0	0	0	0	0	0	0	0	0	0	0	677	0
AAATAG	0	0	0	0	0	0	0	0	0	0	0	0	0	0	0	19332
AAAATT	0	0	0	0	0	0	0	0	0	0	0	0	0	0	0	1017
AAATATAG	0	0	0	0	0	0	0	0	0	0	0	0	0	0	0	826
AATGTATAAGT	617	0	0	0	0	0	0	0	0	0	0	0	0	0	0	0
ACTG	0	0	0	0	0	0	0	0	0	0	0	0	0	0	0	0
AAAGCCACCAAC	0	0	0	0	0	0	0	0	0	0	0	0	0	0	0	0
AACATCAGCAGC	0	0	0	0	0	0	0	0	0	0	0	0	0	0	0	0
A	0	0	0	0	0	0	0	0	0	0	0	0	0	0	0	0
AAAACATGTTCGAAC	0	0	0	0	0	0	0	0	0	0	0	0	0	0	0	0
AACGGGACCGAC	0	0	0	0	0	0	0	0	0	0	0	0	0	0	0	0
AAAGTACTACTG	0	0	0	0	0	0	0	0	0	0	0	0	0	0	0	0
AAAAAT	0	0	0	0	0	0	0	0	0	0	0	0	0	0	0	0
ACTACTACT	0	0	0	0	0	0	0	0	0	0	0	0	0	0	0	0
ACT	0	0	0	0	0	0	0	0	0	0	0	0	0	0	0	0
ACAGCGGTACGG	0	0	0	0	0	0	0	0	0	0	0	0	0	0	0	0
ATACGGAC	0	0	0	0	0	0	0	0	0	0	0	0	0	0	0	0
AACATGTCCTGTTCG	0	0	0	0	0	0	0	0	0	0	0	0	0	0	0	0
AAGAGCAGCAGGAGG	0	0	0	0	0	0	0	0	0	0	0	0	0	0	0	0
AACAACAACAACTAC	0	0	0	0	0	0	0	0	0	0	0	0	0	0	0	0
AACAGATG	0	0	0	0	0	0	0	0	0	0	0	0	0	0	0	0
AATAGAATTG	0	0	0	0	0	0	0	0	0	0	0	0	0	0	0	0
AATATGCAACATTG	0	0	0	0	0	0	0	0	0	0	0	0	0	0	0	0
AATATCTATCTGT	0	0	0	0	0	0	0	0	0	0	0	0	0	0	0	0
AATAGAATCATTGT	0	0	0	0	0	0	0	0	0	0	0	0	0	0	0	0
AAATATTAT	0	0	0	0	0	0	0	0	0	0	0	0	0	0	0	0
ATCCCCTGCTGC	0	0	0	0	0	0	0	0	0	0	0	0	0	0	0	0
ACGCTCTAGGCTCT	0	0	0	0	0	0	0	0	0	0	0	0	0	0	0	0
ACTGCTGGT	0	0	0	0	0	0	0	0	0	0	0	0	0	0	0	0
ACTCGT	0	0	0	0	0	0	0	0	0	0	0	0	0	0	0	0
ATATAGATAG	0	0	0	0	0	0	0	0	0	0	0	0	0	0	0	0
AATCAGCCACCCACC	0	0	0	0	0	0	0	0	0	0	0	0	0	0	0	0
AACAACCACAGCAGC	0	0	0	0	0	0	0	0	0	0	0	0	0	0	0	0
ATCAGCAGC	0	0	0	0	0	0	0	0	0	0	0	0	0	0	0	0
ACTGCC	0	0	0	0	0	0	0	0	0	0	0	0	0	0	0	0
AACGGACAGCCG	0	0	0	0	0	0	0	0	0	0	0	0	0	0	0	0
ATACACCTC	0	0	0	0	0	0	0	0	0	0	0	0	0	0	0	0
AACAGCAGCAGC	0	0	0	0	0	0	0	0	0	0	0	0	0	0	0	0
AAAACAACAAC	0	0	0	0	0	0	0	0	0	0	0	0	0	0	0	0
AAAAGTATTCAT	0	0	0	0	0	0	0	0	0	0	0	0	0	0	0	0
AAATTT	0	0	0	0	0	106	0	0	0	0	0	0	0	0	0	0
AACAGGAGAAGAAGG	0	0	0	0	0	0	0	0	0	0	0	0	0	0	0	0
AACTGGCTCGGC	0	0	0	0	0	0	0	0	0	0	0	0	0	0	0	0
AACAGAACCAG	0	0	0	0	0	0	0	0	0	0	0	0	0	0	0	0
ACTCGGTCGCGT	0	0	0	0	0	0	0	0	0	0	0	0	0	0	0	0
AACATAG	0	0	0	0	0	0	0	0	0	0	0	0	0	0	0	0
AATCGAACAGAACAT	0	0	0	0	0	0	0	0	0	0	0	0	0	0	0	0
AAATATATTAT	0	0	0	0	0	0	0	0	0	0	0	0	0	0	0	0
AATAATAATAATAT	0	0	0	0	0	0	0	0	0	0	0	0	0	0	0	0
ATCTCAGCAGGG	0	0	0	0	0	0	0	0	0	0	0	0	0	0	0	0
ACTACT	0	0	0	0	0	0	0	0	0	0	0	0	0	0	0	0
AATAGCTG	0	0	0	0	0	0	0	0	0	0	0	0	0	0	0	0
ATCTGACCAGGC	0	0	0	0	0	0	0	0	0	0	0	0	0	0	0	0
AAATT	0	0	0	0	0	0	0	0	0	0	0	0	0	0	0	0
AAAATAT	0	0	0	0	0	0	0	0	0	0	0	0	0	0	0	0
AATGTCATGT	0	0	0	0	0	0	0	0	0	0	0	0	0	0	0	0
AAAT	0	0	0	0	0	0	0	0	0	0	0	0	0	0	0	0
AAGGTCCACCAGGGG	0	0	0	0	0	0	0	0	0	0	0	0	0	0	0	0
AAAAGGTGGCT	0	0	0	0	0	0	0	0	0	0	0	0	0	0	0	0
AAACGGAC	0	0	0	0	0	0	0	0	0	0	0	0	0	0	0	0
AATAATAT	0	0	0	0	0	0	0	0	0	0	0	0	0	0	0	0
AAAACTT	0	0	0	0	0	0	0	0	0	0	0	0	0	0	0	0
AAGGAGGAGGAG	0	0	0	0	0	0	0	0	0	0	0	0	0	0	0	0
AAAATATAT	0	0	0	0	0	0	0	0	0	0	0	0	0	0	0	0
ATAGATAG	0	0	0	0	0	0	0	0	0	0	0	0	0	0	0	0
ATCAGCAGCAGCAGC	0	0	0	0	0	0	0	0	0	0	0	0	0	0	0	0
AAATATATATAT	0	0	0	0	0	0	0	0	0	0	0	0	0	0	0	0
AACAAGTTCGAACAG	0	0	0	0	0	0	0	0	0	0	0	0	0	0	0	0
AAGATGATC	0	0	0	0	0	0	0	0	0	0	0	0	0	0	0	0
ATATATC	0	0	0	0	0	0	0	0	0	0	0	0	0	0	0	0
AACTGACT	0	0	0	0	0	0	0	0	0	0	0	0	0	0	0	0
AATAATAAT	0	0	0	0	0	0	0	0	0	0	0	0	0	0	0	0
AGGCCC	0	0	0	0	0	0	0	0	0	0	0	0	0	0	0	0
AACAGCCGCAGC	0	0	0	0	0	0	0	0	0	0	0	0	0	0	0	0
AGC	0	0	0	0	0	0	0	0	0	0	0	0	0	0	0	0
AATTC	0	0	0	0	0	0	0	0	0	0	0	0	0	0	0	0
AAC	0	0	0	0	0	0	0	0	0	0	0	0	0	0	0	0
ACTGGG	0	0	0	0	0	0	0	0	0	0	0	0	0	0	0	0
AAATGTTGCTGG	0	0	0	0	0	0	0	0	0	0	0	0	0	0	0	0
AAATAATAC	0	0	0	0	0	0	0	0	0	0	0	0	0	0	0	0
AAACAGAACATGTTC	0	0	0	0	0	0	0	0	0	0	0	0	0	0	0	0
ACCGTCAGCGGG	0	0	0	0	0	0	0	0	0	0	0	0	0	0	0	0
AATAATATATAATAT	0	0	0	0	0	0	0	0	0	0	0	0	0	0	0	0
AAGTACGAGGTACG	0	0	0	0	0	0	0	0	0	0	0	0	0	0	0	0
AAATATAATC	0	0	0	0	0	0	0	0	0	0	0	0	0	0	0	0
AACAACCACTACGAC	0	0	0	0	0	0	0	0	0	0	0	0	0	0	0	0
ATATATAC	0	0	0	0	0	0	0	0	0	0	0	0	0	0	0	0
AAAGTATCTGAAGG	0	0	0	0	0	0	0	0	0	0	0	0	0	0	0	0
ACTCGGTCCCGT	0	0	0	0	0	294	0	0	0	0	0	0	0	0	0	0
AAGGTGGCGACC	0	0	0	0	0	0	0	0	0	0	0	0	0	0	0	0
ACCTCCGTAGCC	0	0	0	0	0	0	0	0	0	0	0	0	0	0	0	0
ATATAC	0	0	0	0	0	122	0	0	0	0	0	0	0	0	0	0
AACAG	0	0	0	0	0	0	0	0	0	0	0	0	0	0	0	0
AATAATATATAT	0	0	0	0	0	0	0	0	0	0	0	0	0	0	0	0
AAAATGAGAGAAG	0	0	0	0	0	0	0	0	0	0	0	0	0	0	0	0
AAGGAG	0	0	0	0	0	0	0	0	0	0	0	0	0	0	0	0
AACATCCGCAGC	0	0	0	0	0	0	0	0	0	0	0	0	0	0	0	0
ATACAG	0	0	0	0	0	0	0	0	0	0	0	0	0	0	0	0
AAGGAGGAGATCCAG	0	0	0	0	0	0	0	0	0	0	0	0	0	0	0	0
AATAGAAGAG	0	0	0	0	0	0	0	0	0	0	0	0	0	0	0	0
ATACTCGGTCCC	0	0	0	0	0	0	0	0	0	0	0	0	0	0	0	0
AAGAGCAGGAGGAGG	0	0	0	0	0	0	0	0	0	0	0	0	0	0	0	0
ATATATATATATAT	0	0	0	0	0	0	0	0	0	0	0	0	0	0	0	0
ACC	0	0	0	0	0	0	0	0	0	0	0	0	0	0	0	0
AAGTACGGGACC	0	0	0	0	0	0	0	0	0	0	0	0	0	0	0	0
ATATAT	0	0	0	0	0	0	8129	0	0	0	0	0	0	0	0	0
AATAATAATAT	0	0	0	0	0	0	0	0	0	0	0	0	0	0	0	0
AACAGTGGGACC	0	0	0	0	0	0	0	0	0	0	0	0	0	0	0	0
AGCAGC	0	0	0	0	0	0	0	0	0	0	0	0	0	0	0	0
ATAG	0	0	0	0	0	0	0	0	0	0	0	0	0	0	0	0
AACTTCTCC	0	0	0	0	0	0	0	0	0	0	0	0	0	0	0	0
ACCCTGGGGTCC	0	0	0	0	0	0	0	0	0	0	0	0	0	0	0	0
AACAT	0	0	0	0	0	0	0	0	0	0	0	0	0	0	0	0
ATATATATATAT	0	0	0	0	0	0	0	0	0	0	0	0	0	0	0	0
AATCTGCAAGACGCC	0	0	0	0	0	0	0	0	0	0	0	0	0	0	0	0
AAAGATAG	0	0	0	0	0	0	0	0	0	0	0	0	0	0	0	0
ATACTCT	0	0	0	0	0	0	0	0	0	0	0	0	0	0	0	0
AATAACTT	0	0	0	0	0	0	0	0	0	0	0	0	0	0	0	0
AATAAT	0	0	0	0	0	0	0	0	0	0	0	0	0	0	0	0
AAAGTAAGT	0	0	0	0	0	0	0	0	0	0	0	0	0	0	0	0
AGG	0	0	0	0	0	0	0	0	0	0	0	0	0	0	0	0
AATATATAATATAT	0	0	0	0	0	0	0	0	0	0	0	0	0	0	0	0
AACTAGTAAGTAGT	0	0	0	0	0	0	0	0	0	0	0	0	0	0	0	0
AAACAAT	0	0	0	0	0	0	0	0	0	0	49673	0	0	0	0	0
ATATATATAT	0	0	0	0	0	0	0	0	0	0	0	0	0	0	0	0
AACTACTCGTCC	0	0	0	0	0	0	0	0	0	0	0	0	0	0	0	0
ATATATATATAC	0	0	0	0	0	0	0	0	0	0	0	0	0	0	0	0
AACATGTTCTTACAG	0	0	0	0	0	0	0	0	0	0	0	0	0	0	0	0

## Sheet: sech_Y_assembly
sech_Contig	Y_Contig10	Y_Contig113	Y_Contig119	Y_Contig120	Y_Contig129	Y_Contig135	Y_Contig141	Y_Contig149	Y_Contig157	Y_Contig158	Y_Contig160	Y_Contig161	Y_Contig163	Y_Contig171	Y_Contig178	Y_Contig186	Y_Contig201	Y_Contig204	Y_Contig215	Y_Contig38	Y_Contig45	Y_Contig53	Y_Contig54	Y_Contig7	Y_Contig8	Y_Contig99	Y_scaffold1	Y_scaffold2	Y_scaffold3	Y_scaffold4	Y_scaffold5	Y_scaffold6	Y_scaffold7
AATAT	0	0	1043	0	2332	0	0	2087	0	2783	284	3266	0	4374	0	0	0	0	0	2840	206	1865	2445	1460	0	2532	0	7215	56156	15281	0	11292	13111
AAT	0	0	0	9733	0	12621	0	0	0	0	0	0	1913	0	2747	0	0	0	0	0	694	0	0	0	5448	0	3858	4858	366	0	14617	0	0
AACATGTTCTGTTCG	0	0	0	0	0	0	10990	0	17641	0	0	0	0	0	6264	385	12681	0	0	0	0	0	0	0	0	0	0	0	2222	0	0	0	0
ATATATAG	6324	0	0	0	0	0	0	0	0	0	0	0	0	0	0	0	0	12542	1215	0	0	2548	0	0	0	0	0	0	13178	10039	0	0	0
AATATAT	0	0	0	0	0	0	0	0	0	0	0	0	0	0	0	0	0	0	0	0	0	0	0	0	0	0	0	8484	14301	9673	0	0	1261
AAATGT	0	0	0	0	0	0	0	0	0	0	0	0	0	0	0	0	0	0	0	0	0	0	0	0	0	0	0	0	0	26119	0	0	0
AATAG	0	0	0	0	0	0	0	0	0	0	0	0	0	0	0	0	0	0	0	0	0	0	0	0	0	0	0	0	0	0	16966	0	0
AATTAAC	0	0	0	0	0	0	0	0	0	0	0	0	0	0	0	0	0	0	0	0	0	0	0	0	0	0	0	0	7909	0	0	0	0
A	0	0	0	0	0	0	0	0	0	0	0	0	0	0	204	0	0	0	0	0	0	0	0	0	0	0	0	0	0	178	5065	0	0
AATAATAT	0	0	0	0	0	0	0	0	0	0	0	0	0	0	0	0	0	0	0	0	0	0	0	0	0	0	4153	979	0	0	0	0	0
AAAAC	0	0	0	0	0	0	0	0	0	0	0	0	0	0	0	0	0	0	0	0	0	0	0	0	0	0	0	0	0	0	5030	0	0
ACGAG	0	0	0	0	0	0	0	0	0	0	0	0	0	0	0	0	0	0	0	0	0	0	0	0	0	0	0	0	0	0	0	3014	0
AT	0	0	0	0	0	0	0	0	0	0	0	0	0	0	386	0	0	0	0	0	0	0	0	0	0	356	0	112	515	1114	0	150	0
ATATAT	0	0	0	0	0	0	0	0	0	0	0	0	0	0	0	0	0	2423	0	0	0	0	0	0	0	0	0	0	0	0	0	0	0
AAACAGTTAGTG	0	149	0	0	0	0	0	0	0	0	0	0	0	0	160	0	0	0	0	0	0	0	0	0	0	0	1212	0	148	0	0	184	436
AATATAATAT	0	0	0	0	0	0	0	1061	0	0	0	0	0	0	0	0	0	0	0	0	0	0	0	0	0	950	108	0	0	0	0	0	0
AAGAT	0	0	0	0	0	0	0	0	0	0	0	0	0	0	0	0	0	0	0	0	0	0	0	0	0	0	1250	0	0	0	0	0	0
AATATAATATTATAT	0	0	0	0	0	0	0	1103	0	0	0	0	0	0	0	0	0	0	0	0	0	0	0	0	0	0	0	0	0	0	0	0	0
AATATAATATAATAT	0	0	0	0	0	0	0	0	0	0	0	0	0	0	0	0	0	0	0	0	0	0	0	0	0	0	0	0	741	0	0	0	0
AATATATGTGGATGT	0	0	0	0	0	0	0	0	0	0	0	0	0	0	0	0	0	0	0	0	0	0	0	0	0	0	0	0	0	0	0	0	612
AATCTC	0	0	0	0	0	0	0	0	0	0	0	0	0	0	0	0	0	0	0	0	0	0	0	0	0	0	600	0	0	0	0	0	0
AAAATTAC	0	0	0	0	0	0	0	0	0	0	0	0	0	0	0	0	0	0	0	0	0	0	0	0	0	0	0	0	357	0	0	0	0
AAACAAC	0	0	0	0	0	0	0	0	0	0	0	0	0	0	0	0	0	0	0	0	0	0	0	0	0	0	0	0	351	0	0	0	0
AAAATGAGAGAAG	0	0	0	0	0	0	0	0	0	0	0	0	0	0	0	0	0	0	0	0	0	0	0	0	0	0	0	0	0	0	155	167	0
AATAC	0	0	0	0	225	0	0	0	0	0	0	0	0	0	0	0	0	0	0	0	0	0	0	0	0	0	0	0	0	0	0	0	0
AATATATGTAGATGT	0	0	0	0	0	0	0	0	0	0	0	0	0	0	0	0	0	0	0	0	0	0	0	0	0	0	0	198	0	0	0	0	0
AAAATGTTCTGTTCG	0	0	0	0	0	0	0	0	0	0	0	0	0	0	0	187	0	0	0	0	0	0	0	0	0	0	0	0	0	0	0	0	0
AAAATTTACATTT	0	0	0	0	0	0	0	0	0	0	0	0	0	0	0	0	0	0	0	0	0	0	0	0	0	0	0	0	138	0	0	0	0
