# Supplementary material for: Unique structure and positive selection promote the rapid divergence of Drosophila Y chromosomes
Source: eLife. 2022 Jan 6;11:e75795. doi: 10.7554/eLife.75795 (PMC8794474; doi:10.7554/eLife.75795)
Supplement: Supplementary file 7. — We list information on the recent Y-linked duplications and genes, including copy numbers, expression levels, phylogenies, and open reading frames. We also included some duplications from repetitive regions where we can date their origins. [file elife-75795-supp7.xlsx]

## Sheet: Sheet1
Supplementary file 7. Recent Y-linked duplications in D. melanogaster and species in the D. simulans clade. We list information on the recent Y-linked duplications and genes, including copy numbers, expression levels, phylogenies, and open reading frames. We also included some duplications from repetitive regions where we can date their origins.
Gene	Transcript id	Location in DDmel	Species	The lineage that duplication occurred	# of Y-linked copy in assemblies (Dmel,Dmau,Dsim,Dsech)	Phylogeny analyses	Found in previous studies	DNA or RNA based duplication	PCR validation in this study	Expression (≥ 3TPM, Dmau,Dsim)	Orf ≥ 100 a.a. (Dmel,Dmau,Dsim,Dsech)**	Function (Expression and good ORF)	Comment
Tctp	FBtr0082344	3R:11210381..11210899	Dsim clade and Dmel	independent duplication	(1,1,4,4)	independent duplication	1,3	Unknown		T,F	F,T,T	Possibly	extra 2R copy in Dsech_U, more copies in Dsim, 2 independent duplication, Dsech misassembly, should on Y
Tmtc3	FBtr0071637	2R:complement(join(21123735..21125002,21125063..21125844,21125906..21127133,21128402..21128510))	Dmau	Dmau	2	recent gain, no strong support	3	RNA		F	T	F	also called CG4050
CG3511	FBtr0072309	2R:24571627..24574503	Dmau	Dmau	7	recent gain	1,3	RNA		F	T	F
Neurochondrin	FBtr0081729	3R:6468437..6471016	Dmau	Dmau	1	recent gain	new	DNA		F	F	F
tbrd-2	FBtr0086511	2R:join(19259909..19260067,19260122..19262294)	Dmau	Dmau	1	recent gain	1	Unknown	Y	T	T	T
AGO1	FBtr0087612	2R:complement(join(13943747..13948110,13948177..13949787,13949850..13950072,13950132..13950917,13951614..13951688,13954687..13954849,13957173..13957350,13957962..13958089))	Dmau	Dmau	1	recent gain	new	Unknown		F	F	F
numb	FBtr0079821	2L:join(9437469..9437959,9447018..9447047,9460505..9460753,9460938..9463123)	Dmau	Dmau*	8	No information	1,3	Unknown		T	F	F
atl	FBtr0084656	3R:join(24625671..24625812,24631783..24632091,24632157..24633370,24633433..24633499,24633558..24634714)	Dmau	Dmau*	2	No information	new	DNA		F	F	F	multiple copies, also in other chrom
Hsp83	FBtr0073040	3L:join(3193216..3193367,3194499..3197059)	Dmel	Dmel	4	recent gain	2	RNA		NA	F	F
Gs1l	FBtr0077453	2L:complement(join(4455193..4455738,4456114..4456332,4456386..4456520,4456724..4456807))	Dmel	Dmel	2	recent gain	1,2	DNA		NA	F	F
Pka-R1,CG3618,Mst77F	FBtr0078270	3L:join(20816118..20816833,20832846..20833205,20833283..20833657,20833733..20833869,20834002..20834658)	Dmel	Dmel	15-18	recent gain	2	DNA		NA	T	T(Mst77F)
fru	FBtr0083646	3R:complement(join(18427480..18430964,18432564..18432818,18434235..18435062,18435370..18435570,18435643..18435790,18446701..18447329))	Dmel	Dmel	6	recent gain	2	Unknown		NA	F	F
CR43975	FBtr0333951	3R:21,216,820..21,217,242	Dmel	Dmel	78	recent gain	1,2	DNA		NA	F	F
vig2, Mocs2, Clbn, Bili			Dmel	Dmel	1-7	recent gain	1,2	DNA		NA	T	T(vig2)	known as fdy
ProtA	FBgn0013300	2L:14,879,050..14,881,652 [-]	Dmel	Dmel	9	recent gain	2	DNA		NA	F	F	Mst35a, majorly intron
CG12717, ade5	FBtr0073704	X:complement(12761298..12763343)	Dmel and Dsim clade	Dmel group	(33-214,17,0,0)	Dmel group, lost in Dsim and Dsech	1,2,3	DNA		F,F	T,T	T(small RNA)	only X and Y in Dmel, everywhere in Dmau
smt3	FBtr0079356	2L:complement(join(6966780..6967385,6967508..6967644))	Dmel, Dsim clade	Dmel group	(5,7,13,15)	Dmel group	3	RNA		NA	F,F,F,F	F	an extra copy on 3L in Dmel, retrogene, some copies in Dsech_U mdg3
14-3-3zeta	FBtr0088415	2R:join(10104348..10104409,10104717..10104830,10104941..10105067,10105702..10105825,10106634..10106797,10107467..10107622)	Dsim clade	Dmel group	(1,8,3)	lost in Dmel	1,3	RNA		F,T	T,T,T	Possibly
Akap200	FBtr0079664	2L:join(8426911..8427093,8427158..8427553,8427615..8428067,8430281..8430367)	Dsim clade, 3cen in Dmel	Dsim clade	1	Dsim clade	3	RNA		T,F	T,F,T	Possibly
Dbp80	FBtr0331783	3L:join(27279316..27279422,27279481..27279539,27292882..27293013,27293076..27293271,27331994..27332108,27332169..27332346,27350220..27350321,27380953..27381088,27390944..27391053,27420679..27420841,27420952..27421014,27421957..27422159)	Dmel, Dsim, Dmau	Dmel group*	(1,2,3)	No information, lost in Dsech	3	Dmel:DNA		NA	F,F,F	F	also on other chromosomes
Ssl	FBtr0072351	2R:complement(join(24499243..24499542,24499603..24500124,24500182..24500267))	Dmel group	Dmel group	mutiple	Dmel group	2	DNA		T,T	F,T,T	T	see the text for the detail
CG5886	FBtr0084907	3R:join(25851632..25851804,25851920..25852320,25852428..25852574,25852817..25853989)	Dmel	Dmel*	2	No information	2	Unknown		NA	F	F
CG41561	FBtr0347010	211000022280328:complement(join(7386..7523,7582..8551,9154..9380,9435..9527))	Dmel and Dsim clade	NA	1	Conserved	2,3	NA		T,T	T,T,T,T	T	Ancient Y-linked gene, fixed the misassembly in Dsech
eIF3m, O-fut1	FBtr0087579	2R:complement(join(14163066..14164136,14164191..14164370,14164487..14164825))	Dsech	Dsech	1	recent gain	3	DNA		NA	T	F
CG18809, COX6B, CG14234	FBtr0074815	X:complement(join(19741224..19742905,19743444..19743706,19744262..19744335))	Dsech	Dsech	1	recent gain	new	DNA		NA	T	F
CG5645	FBtr0076024	3L:complement(join(12133771..12134659,12134725..12134888,12134949..12136450,12136517..12136706))	Dsech	Dsech	1	recent gain	new	DNA		NA	T	F	pseudogene
fu12	FBtr0079703	2L:complement(join(8449691..8450728,8450794..8451004,8463627..8463994))	Dsech	Dsech	1	recent gain	3	RNA		NA	F	F
His1:CG31617	FBtr0085892	2L:21421855..21422877	Dsech	Dsech	2	recent gain	3	DNA		NA	F	F	nonfunctional, may be the same translocation as other histones
Tsp42Ee	FBtr0086180	2R:join(7012254..7012335,7013033..7013116,7017013..7017375,7017435..7017626,7017690..7018362)	Dsech	Dsech	3	recent gain	3	RNA		NA	T	F	maybe repetitive
wde	FBtr0088253	2R:complement(join(10800420..10801171,10801234..10801658,10802237..10805513,10805575..10805727,10808740..10808938))	Dsech	Dsech	1	recent gain	new	RNA	Y	NA	T	F
CG14615, CG14621	FBtr0339557	X:complement(join(22447183..22448136,22448532..22449403))	Dsech	Dsech	1	recent gain	3	DNA		NA	F	F	pseudogene
eff	FBtr0083018	3R:complement(join(14732705..14733634,14733700..14733883,14734387..14734418,14737420..14737483,14740380..14740940,14741007..14741319))	Dsech	Dsech	2	recent gain	new	Unknown		NA	F	F	multiple copies, also on other chromosomes
Sclp (CR32660)	FBtr0331748	X:complement(join(11920004..11920186,11920244..11920337,11920410..11920581,11920653..11921004,11921784..11921931,11921998..11922165,11922230..11922373,11924158..11924662))	Dsech	Dsech*	1	No information	new	DNA		NA	F	F
Myo81F	FBtr0392909	3R:join(567076..567268,835376..835491,869486..869548,895786..895893,947426..947570,1025040..1025614,1138730..1138972,1191610..1191975,1342196..1342317,1454572..1455091,1467146..1467258,1588295..1588538,1845561..1846163,1861194..1861417,1938067..1938205,1961120..1961515,2136430..2137402,2307285..2307583,2413805..2414131,2461182..2461592,2503677..2503880,2532798..2532932)	Dsech	Dsech*	3	No information	3	DNA		NA	F	F	too many TEs in introns
Sod1	FBtr0076229	3L:complement(join(11112281..11112848,11113574..11113740))	Dsim	Dsim	2	recent gain	1	RNA		F	T	Possibly
bru1	FBtr0080344	2L:join(12205843..12206130,12240868..12241780,12271591..12272084,12278837..12278919,12282514..12282562,12298568..12298749,12298814..12299111,12299188..12299394,12304446..12304595,12310682..12311093,12312376..12312465,12312526..12312795)	Dsim	Dsim	1	recent gain, no strong support	new	Unknown		F	F	F
Nup154	FBtr0089881	2L:join(11004820..11005078,11005139..11005301,11005368..11005861,11005921..11006093,11006162..11007132,11007192..11007431,11007495..11007656,11007715..11008261,11008320..11008845,11008911..11009377,11009443..11009565,11009627..11009872)	Dsim	Dsim	4	recent gain	3	Unknown		F	F	F
Vhl	FBtr0088115	2R:11279725..11280670	Dsim	Dsim*	1	No information	3	Unknown		F,F	F	F
CG16781, CG12206, CG10801	FBtr0070530	X:complement(join(3462474..3463827,3463890..3464044))	Dmau	Dsim clade	1	lost in Dsim and Dsech	1	DNA	Y	T	T	T (CG16781)	CG16781 still have good coding frame
dhd	FBtr0070749	X:5312354..5313125	Dmau	Dsim clade	1	lost in Dsim and Dsech	3	Unknown		F	F	F
osa	FBtr0089581	3R:complement(join(17687818..17693455,17693524..17693605,17693715..17693913,17694136..17694295,17695923..17696150,17696370..17696586,17697656..17697916,17697981..17698162,17698230..17698964,17699095..17699487,17699547..17699703,17707771..17707989,17708054..17708347,17715852..17716934,17717956..17718350))	Dmau	Dsim clade	1	lost in Dsim and Dsech	3	Unknown		F	F	F	multiple copies, also on other chromosomes
CG13876	FBtr0072484	3L:join(206192..206318,206376..207112)	Dmau, Dsech	Dsim clade	(9,4)	lost in Dsim	1,3	RNA		T	T	Possibly	Repetitive
CG43845, Nmdar1	FBtr0078763	3R:complement(5522299..5523120)	Dmau, Dsech	Dsim clade	(7-9,4)	lost in Dsim	1,3	DNA		T	F	F	CG43845 express
Cyp6t1	FBtr0077212	X:complement(21517549..21519138)	Dsech	Dsim clade	1	lost in Dsim and Dmau	3	DNA		NA	T	F
Ac76E	FBtr0074897	3L:join(19939287..19939542,19949262..19949605,19964268..19964401,19964622..19964819,19964880..19965002,19965727..19965921,19966229..19966456,19966734..19966861,19969082..19969240,19970860..19971611,19971924..19972022,19972853..19972971,19973341..19973567,19973636..19973843,19974268..19974581,19974669..19974831,19974890..19975102,19975371..19975475,19976091..19976333,19976864..19977960)	Dsech	Dsim clade	1	lost in Dsim and Dmau	3	DNA		NA	F	F
Dp1	FBtr0086679	2R:join(18412027..18412356,18413002..18413077,18415199..18415286,18415345..18415595,18415663..18417516,18417577..18418965,18419051..18420742)	Dsech	Dsim clade	2	lost in Dsim and Dmau, only one informative site	3	Unknown		NA	F	F
Desat1	FBtr0082626	3R:join(12439600..12439711,12444799..12445118,12445978..12446314,12446376..12446561,12446623..12447616)	Dsim	Dsim clade	1	lost in Dsech and Dmau, only 1 informative site	3	RNA		F	F	F
Cyp1, SWIP	FBtr0074238	X:complement(join(16317673..16318607,16320079..16320370))	Dsim and Dsech	Dsim clade	1	lost in Dmau	1,3	DNA		F	T,T	F
CG32820,CG17450, DIP1	FBtr0070056	X:complement(join(21611797..21611933,21612004..21612727,21612888..21613475,21613599..21614183))	Dsim and Dsech	Dsim clade	1	lost in Dmau	1	DNA		F	T,F,T	T(CG17450 and DIP1)	CG17450 and DIP1 has ORF
sdt	FBtr0089974	X:join(8216129..8216334,8216903..8217074,8223628..8223866,8223956..8224047,8224785..8226083,8227871..8228098,8235589..8235820,8235882..8237169,8237232..8237428,8237810..8237941,8238007..8238188,8238252..8240474)	Dsim and Dsech	Dsim clade	(4,1)	lost in Dmau	1,3	RNA		F	T,T	F
SRPK	FBtr0087383	2R:15380724..15387851	Dsim clade	Dsim clade	(41,146,50)	Dsim clade	1,3	DNA		T,T	T,T,T	T	see the text for the detail
His2A, His3 and His4		2L:complement(21419576..21419887)	Dsim clade	Dsim clade	(13,1,2)	Dsim clade	3	DNA		F,F	T,F,F	F
mitochondria		mt	Dsim clade	Dsim clade	(1,1,2)	Dsim clade	3	DNA		T,T	T,T,T	Possibly	a full mitochondrion integration in the ancestor of the Dsim clade
Pih1D1, CG5787	FBtr0332410	2L:complement(join(12721653..12721721,12721451..12721562,12713650..12714296,12713443..12713586,12713340..12713375))	Dsim clade	Dsim clade	2	Dsim clade	1,3	DNA		F,F	T,T,T	F
His3.3B	FBtr0071345	X:complement(join(9153238..9154240,9154380..9154685,9156580..9156669))	Dsim clade	Dsim clade	2	Dsim clade	1,3	Unknown		F,F	T,F,F	F
CG7492, Ank2	FBtr0303111	3L:complement(join(7651866..7653400,7653461..7654099,7654253..7654752))	Dsim and Dmau	Dsim clade*	1	Unknown	1,3	DNA		F,F	T,F	F	CG7492 has an ORF
CG4455	FBtr0080836	2L:join(16353095..16353134,16353213..16353553)	Dsim and Dmau	Dsim clade*	(4,7)	Dsim clade	1,3	DNA		F,F	T,F	F
Hrb27C	FBtr0307031	2L:join(6920704..6920861,6922731..6922826,6923784..6924400,6924685..6926806)	Dsim and Dmau	Dsim clade*	1	No information	1,3	DNA		F,F	F,F	F
CG11638	FBtr0070183	X:complement(join(1013984..1015079,1015140..1015349,1015469..1016246,1016521..1016708,1026514..1026703))	Dsim and Dmau	Dsim clade*	1	No information	3	Unknown		F,F	F,F	F	multiple copies, also on other chromosomes
TSG101	FBtr0075329	3L:join(16842294..16842676,16842792..16842876,16842967..16843032,16843103..16843378,16843510..16843730,16843792..16844138,16844207..16844585)	Dsim clade	Dsim clade*	(2,2,1)	No information	3	DNA		F,F	F,F	F	from the extra copies on 3R
tok	FBtr0084690	3R:join(24720057..24720220,24727706..24728326,24742611..24742957,24743163..24743584,24744008..24744295,24744788..24745027,24745093..24745651,24745761..24745959,24746038..24746302,24746394..24746599,24746830..24747473,24747592..24747772,24747835..24748097,24748157..24749125)	Dsim clade	Dsim clade*	2	No information	3	Unknown		F,F	F,F,F	F
Mtor	FBtr0088033	2R:join(11852617..11852906,11853348..11859483,11859540..11859871,11859930..11860063,11860315..11860853)	Dsim clade	Dsim clade*	(22,59,14)	No information	3	Unknown		F,F	F,F,F	F	multiple copies, also on other chromosomes
zip	FBtr0072398	2R:complement(join(24990570..24991272,24991810..24991973,24992033..24993328,24993391..24993921,24994012..24994316,24994407..24997146,24997209..24997301,24997578..24997697,24998278..24998301,25000039..25000160,25002288..25002444,25005868..25006083,25010380..25010616,25011376..25011463))	Dsim clade	Dsim clade*	(24,31,18)	No information	3	Unknown		F,F	T,T,T	F	multiple copies, also on other chromosomes
* inferred by parsimony
** inclduing all frame and no start codon needed
1 Tobler et al. 2. Chang and Larracuente 3. Chakroborty, Chang et al.
