# Supplementary material for: Unique structure and positive selection promote the rapid divergence of Drosophila Y chromosomes
Source: eLife. 2022 Jan 6;11:e75795. doi: 10.7554/eLife.75795 (PMC8794474; doi:10.7554/eLife.75795)
Supplement: Supplementary file 9. — We summarized the expression level of conserved Y-linked genes and ampliconic genes. We sum up the gene expression for genes with multiple duplicated copies on Y chromosomes. [file elife-75795-supp9.xlsx]

## Sheet: a. Canonical
Supplementary file 9. The summary of conserved Y-linked genes and ampliconic genes expression. We summarized the expression level of conserved Y-linked genes and ampliconic genes. We sum up the gene expression for genes with multiple duplicated copies on Y chromosomes.
		Dmel							Dmau			Dsim
		Total RNA	Total RNA	mRNA	mRNA	mRNA	mRNA	mRNA	mRNA	mRNA	mRNA	Total RNA	Total RNA	mRNA	mRNA
Star_TPM	Gene length (with unassembled introns)	SRR1197297,SRR1197377 (testis_d4_1)	SRR1197301,SRR1197381 (testis_d4_2)	SRR070422 (mated males)	SRR350960 (mated males)	SRR350961	SRR5388567	SRR5388568	SRR9025052	SRR9025053	SRR9025054	SRR7410596	SRR7410597	SRR9025060	SRR9025055
ARY	short	22.3918	51.7163	10.8438	6.88975	12.2158	51.5902	48.3698	185.207	151.156	105.928	184.636	185.316	300.858	226.58
CCY	long	12.6741	53.9311	2.38958	1.73914	12.826	70.2892	70.7074	37.0701	37.262	29.5958	84.3745	86.4548	13.1298	34.3224
kl-2	long	22.6085	37.7722	0.056042	0.171666	4.61944	27.6995	31.6251	11.9198	11.7269	11.3302	32.5039	33.3212	4.78157	5.15876
kl-3	long	12.1311	33.7803	0.183925	0.131095	2.08879	14.509	14.1727	13.2317	16.4697	11.3122	134.338	143.792	24.0372	40.0929
kl-5	long	31.7066	43.8995	10.796	4.82215	5.30719	59.945	59.6566	15.4729	23.002	26.7203	69.0326	76.672	14.5592	11.9293
ORY	long	26.0404	35.3046	4.53417	3.13214	10.5757	36.8104	34.2398	127.483	118.775	72.9894	225.52	222.535	53.6583	66.0904
PRY	long	7.75953	12.5245	0.023466	0.015079	2.0185	7.27879	10.0151	13.0833	16.4329	8.96198	39.9466	37.0454	9.47323	11.1796
Ppr-Y	long	19.7624	34.8536	4.28301	3.44526	3.47663	20.7572	25.1843	28.5448	29.1767	18.6764	72.3476	67.2962	43.4557	47.1495
Pp1-Y1	short	0	0	0	0	0	0.963376	0.281008	66.6759	56.9335	58.5253	22.9011	18.5289	47.9279	29.048
Pp1-Y2	short	11.0227	33.7836	6.12531	4.64455	3.57876	33.2556	29.05	97.0964	98.2017	92.8363	38.3871	33.5759	61.6587	52.6062
WDY	long	12.1082	20.6301	0.635053	0.543785	3.34593	32.116	32.8264	28.1298	26.2929	37.5271	98.2619	98.1362	54.3339	61.4601

## Sheet: b. Gene_family
Dmel	copy #	SRR1197297,SRR1197377 (testis_d4_1)	SRR1197301,SRR1197381 (testis_d4_2)	SRR070422	SRR350960	SRR350961	SRR5388567	SRR5388568
SRPK-other	1	5.07918	13.7582	32.2211	33.6674	87.657	49.7094	54.1705
SRPK-RC	1	9.67	18.0171	4.12653	6.76801	6.51234	13.8656	19.7642
Dsim	copy #	SRR9025060	SRR9025055	SRR7410596	SRR7410597
SRPK-other	1	45.0874	74.6382	51.0439	53.6385
Lhk-1	100	325.15	326.358	236.8	237.622
Lhk-2	46	126.863	218.64	173.763	182.36
CK2-beta-like	4	67.6347	81.2488	71.9413	66.6745
CK2-beta-Y	123	182.012	180.258	156.582	157.929
Dmau	copy #	SRR9025052	SRR9025053	SRR9025054
SRPK-other	1	15.8225	22.1062	28.017
Lhk-1	21	66.7345	65.6526	81.3609
Lhk-2	20	37.6258	61.2272	74.1567
CK2-beta-like	9	98.9545	131.064	138.704
CK2-beta-Y	100	56.972	66.6033	64.9662
Dsech	copy #
SRPK-other	1
Lhk-1	33
Lhk-2	17
CK2-beta-like	7
CK2-beta-Y	36
