# Supplementary material for: Unique structure and positive selection promote the rapid divergence of Drosophila Y chromosomes
Source: eLife. 2022 Jan 6;11:e75795. doi: 10.7554/eLife.75795 (PMC8794474; doi:10.7554/eLife.75795)
Supplement: Supplementary file 10. [file elife-75795-supp10.xlsx]

## Sheet: Sheet1
Supplementary file 10. The number of small RNA reads mapped to the repetitive sequences and Y-linked gene families in the D. simulans clade.
Repetitive elements	Length	SRR7410589	SRR7410590
MARINA#DNA/TcMar-Mariner	1267	2970	2332
NOF_FB#DNA/MULE-NOF	4347	5727	6176
PLACW_DM#DNA/P	930	1634	811
PROTOP#DNA/P	4480	17405	7589
PROTOP_A#DNA/P	1105	6440	2349
PROTOP_B#DNA/P	1153	6936	2329
P_DB#DNA/P	2935	6642	16097
P_DG#DNA/P	2888	4230	5395
LOOPER1_DM#DNA/PiggyBac	1881	8831	15329
POGO#DNA/TcMar-Pogo	2121	3741	1861
POGON1#DNA/TcMar-Pogo	186	182	59
BARI1#DNA/TcMar-Tc1	1750	3207	2020
BARI_DM#DNA/TcMar-Tc1	1728	2701	1228
FB4_DM#DNA/TcMar-Tc1	4089	19253	18824
MINOS#DNA/TcMar-Tc1	1775	3375	2441
Mariner2_DM#DNA/TcMar-Tc1	912	983	553
Mariner_DMA#DNA/TcMar-Mariner	1286	1241	890
PARIS#DNA/TcMar-Tc1	1730	4128	1595
S2_DM#DNA/TcMar-Tc1	1735	3848	1595
S_DM#DNA/TcMar-Tc1	1736	2357	1489
TC1-2_DM#DNA/TcMar-Tc1	1644	3055	1316
TC1_DM#DNA/TcMar-Tc1	1666	2446	979
UHU#DNA/TcMar-Tc1	1655	2860	1917
M4DM#DNA/CMC-Transib	1435	3325	1185
TRANSIB1#DNA/CMC-Transib	3014	9468	6938
TRANSIB2#DNA/CMC-Transib	2844	10265	5312
TRANSIB3#DNA/CMC-Transib	2883	4724	4880
TRANSIB4#DNA/CMC-Transib	2610	8208	3743
Transib1_DP#DNA/CMC-Transib	2983	16439	4617
Transib2_DP#DNA/CMC-Transib	3032	5432	2552
Transib3_DP#DNA/CMC-Transib	2783	5277	3287
Transib-N1_DM#DNA/CMC-Transib	514	465	229
HOBO#DNA/hAT-hobo	3016	7058	7752
MAR_DW#DNA/hAT	610	522	294
VEGE_DW#DNA/hAT-Tip100	884	1141	577
hAT-1N_DP#DNA/hAT	557	1438	504
hAT-1_DP#DNA/hAT-Ac	2699	4072	1659
DMCR1A#Non-LTR_retrotransposon/CR1	4470	9080	5400
WORF_DMi#Non-LTR_retrotransposon/CR1	4174	6816	2725
CIRCE#LTR/Gypsy	6356	15947	19259
IVK_DM#Non-LTR_retrotransposon/I	5402	9426	4639
I_DM#Non-LTR_retrotransposon/I	5374	7651	5884
BS#Non-LTR_retrotransposon/Jockey	5126	6313	5623
BS2#Non-LTR_retrotransposon/Jockey	4721	35651	14114
BS3_DM#Non-LTR_retrotransposon/Jockey	1790	8479	3485
BS4_DM#Non-LTR_retrotransposon/Jockey	754	1858	437
DOC#Non-LTR_retrotransposon/Jockey	4725	10533	10404
DOC2_DM#Non-LTR_retrotransposon/Jockey	4793	6841	5113
DOC3_DM#Non-LTR_retrotransposon/Jockey	4740	17982	12288
DOC4_DM#Non-LTR_retrotransposon/Jockey	2791	4640	2974
DOC5_DM#Non-LTR_retrotransposon/Jockey	4682	9804	7080
DOC6_DM#Non-LTR_retrotransposon/Jockey	4222	11085	9584
FW2_DM#Non-LTR_retrotransposon/Jockey	3961	5691	10129
FW3_DM#Non-LTR_retrotransposon/Jockey	3132	3503	1737
FW_DM#Non-LTR_retrotransposon/Jockey	4692	6867	5014
G3_DM#Non-LTR_retrotransposon/Jockey	4605	11597	22671
G4_DM#Non-LTR_retrotransposon/Jockey	3856	6150	4501
G5A_DM#Non-LTR_retrotransposon/Jockey	2841	3545	9483
G5_DM#Non-LTR_retrotransposon/Jockey	4856	10312	13706
G6_DM#Non-LTR_retrotransposon/Jockey	2042	3496	1675
G7_DM#Non-LTR_retrotransposon/Jockey	1192	2963	866
G_DM#Non-LTR_retrotransposon/Jockey	4346	7062	6996
HELENA#Non-LTR_retrotransposon/Jockey	4004	6174	8943
HELENA_RT#Non-LTR_retrotransposon/Jockey	1317	1383	561
Jockey2#Non-LTR_retrotransposon/Jockey	3428	5215	2278
LINEJ1_DM#Non-LTR_retrotransposon/Jockey	5020	10222	29881
SPOCK_DMi#Non-LTR_retrotransposon/Jockey	4952	10585	4521
UVIR_DV#Non-LTR_retrotransposon/Jockey	6565	12690	7458
Baggins1#Non-LTR_retrotransposon/LOA	5453	8970	5413
Bilbo#Non-LTR_retrotransposon/LOA	5530	7794	7555
TRIM#Non-LTR_retrotransposon/LOA	3111	3597	4097
DNAREP1_DM#RC/Helitron	594	1387	726
ISFUN1#RC/Helitron	928	1229	641
PENELOPE#Non-LTR_retrotransposon/Penelope	2780	5849	3137
DMRT1A#Non-LTR_retrotransposon/R1	5183	10085	11453
DMRT1B#Non-LTR_retrotransposon/R1	5183	7443	5785
DMRT1C#Non-LTR_retrotransposon/R1	5443	7515	5127
R1-2_DM#Non-LTR_retrotransposon/R1	3216	5907	13916
R1_DM#Non-LTR_retrotransposon/R1	5356	13440	8567
R2B_DM#Non-LTR_retrotransposon/R2	3528	122725	23886
R2_DM#Non-LTR_retrotransposon/R2	3607	8590	8303
HETA#Non-LTR_retrotransposon/Jockey	6081	15797	18631
TART_B1#Non-LTR_retrotransposon/Jockey	10654	17755	12033
TART_DV#Non-LTR_retrotransposon/Jockey	15099	26773	11394
Copia2_I#LTR/Copia	4162	5555	4145
Copia2_LTR_DM#LTR/Copia	198	181	47
Copia_I#LTR/Copia	4593	12690	12252
Copia_LTR#LTR/Copia	276	673	491
DM1731_I#LTR/Copia	3976	6274	2927
DM1731_LTR#LTR/Copia	336	487	274
ACCORD2_I#LTR/Gypsy	7212	10856	9106
ACCORD2_LTR#LTR/Gypsy	215	787	840
ACCORD_I#LTR/Gypsy	6288	17515	13062
ACCORD_LTR#LTR/Gypsy	558	1348	1063
BLASTOPIA_I#LTR/Gypsy	4481	6444	3682
BLASTOPIA_LTR#LTR/Gypsy	275	1074	1413
BLOOD_I#LTR/Gypsy	6613	13163	11717
BLOOD_LTR#LTR/Gypsy	399	409	205
BURDOCK_I#LTR/Gypsy	5860	9402	7373
BURDOCK_LTR#LTR/Gypsy	275	399	176
DM176_I#LTR/Gypsy	6420	15634	7675
DM176_LTR#LTR/Gypsy	507	739	400
DM297_I#LTR/Gypsy	6167	13012	15748
DM297_LTR#LTR/Gypsy	414	464	148
DM412#LTR/Gypsy	6477	35899	29634
DM412B_LTR#LTR/Gypsy	571	1879	551
DMLTR5#LTR/Gypsy	266	212	224
DMTOM1_LTR#LTR/Gypsy	410	620	384
GTWIN_I#LTR/Gypsy	6421	14653	59421
GTWIN_LTR#LTR/Gypsy	495	570	288
Gypsy2_I#LTR/Gypsy	6135	8788	7189
Gypsy2_LTR#LTR/Gypsy	353	339	149
Gypsy3_I#LTR/Gypsy	6177	8635	12065
Gypsy3_LTR#LTR/Gypsy	398	533	1125
Gypsy4_I#LTR/Gypsy	6288	9150	8160
Gypsy4_LTR#LTR/Gypsy	287	133	51
Gypsy5_I#LTR/Gypsy	6509	16141	34280
Gypsy5_LTR#LTR/Gypsy	430	517	1477
Gypsy6A_LTR#LTR/Gypsy	420	894	321
Gypsy6_I#LTR/Gypsy	7012	11559	18054
Gypsy6_LTR#LTR/Gypsy	407	494	2345
Gypsy7_I#LTR/Gypsy	4984	18343	6968
Gypsy7_LTR#LTR/Gypsy	251	210	213
Gypsy8_I#LTR/Gypsy	4347	5318	9744
Gypsy8_LTR#LTR/Gypsy	304	176	98
Gypsy9_I#LTR/Gypsy	4677	11355	4588
Gypsy9_LTR#LTR/Gypsy	336	543	169
Gypsy10_I#LTR/Gypsy	5278	19042	19689
Gypsy10_LTR#LTR/Gypsy	364	10656	8975
Gypsy11_I#LTR/Gypsy	3524	8532	11243
Gypsy11_LTR#LTR/Gypsy	452	555	455
Gypsy12A_LTR#LTR/Gypsy	2280	4151	4852
Gypsy12_I#LTR/Gypsy	5546	6314	5678
Gypsy12_LTR#LTR/Gypsy	2336	5057	6085
Gypsy_DS#LTR/Gypsy	7522	30837	181135
Gypsy_I#LTR/Gypsy	6507	11346	7940
Gypsy_LTR#LTR/Gypsy	482	300	169
HMSBEAGLE_I#LTR/Gypsy	6529	16647	8065
IDEFIX_I#LTR/Gypsy	5628	14488	6351
IDEFIX_LTR#LTR/Gypsy	594	959	4001
Invader1_I#LTR/Gypsy	3186	14438	16560
Invader1_LTR#LTR/Gypsy	423	369	313
Invader2_I#LTR/Gypsy	4592	6668	7033
Invader2_LTR#LTR/Gypsy	266	288	108
Invader3_I#LTR/Gypsy	4888	7483	7042
Invader3_LTR#LTR/Gypsy	298	382	244
Invader4_I#LTR/Gypsy	2413	9431	2611
Invader4_LTR#LTR/Gypsy	346	645	402
Invader5_I#LTR/Gypsy	3334	4489	3050
Invader5_LTR#LTR/Gypsy	352	399	1304
Invader6_I#LTR/Gypsy	4099	5782	3218
Invader6_LTR#LTR/Gypsy	393	391	336
MDG1_I#LTR/Gypsy	6596	18733	10413
MDG1_LTR#LTR/Gypsy	442	618	280
MDG3_I#LTR/Gypsy	4986	9350	16661
MDG3_LTR#LTR/Gypsy	267	395	131
MICROPIA_I#LTR/Gypsy	4476	11330	5176
MICROPIA_LTR#LTR/Gypsy	476	485	158
NOMAD_I#LTR/Gypsy	6572	13977	7405
NOMAD_LTR#LTR/Gypsy	518	1097	790
OSVALDO_I#LTR/Gypsy	6653	14157	15196
OSVALDO_LTR#LTR/Gypsy	1196	835	476
QUASIMODO_I#LTR/Gypsy	6060	13562	13494
QUASIMODO_LTR#LTR/Gypsy	658	813	317
ROVER-I_DM#LTR/Gypsy	6584	14255	9616
ROVER-LTR_DM#LTR/Gypsy	367	328	206
STALKER4_I#LTR/Gypsy	6530	95003	143468
STALKER4_LTR#LTR/Gypsy	402	886	590
Stalker2_I#LTR/Gypsy	7396	14888	7061
Stalker2_LTR#LTR/Gypsy	424	925	687
Stalker3_LTR#LTR/Gypsy	372	515	524
TABOR_I#LTR/Gypsy	6336	13015	9848
TABOR_LTR#LTR/Gypsy	506	1550	891
TIRANT_I#LTR/Gypsy	7692	10601	8428
TIRANT_LTR#LTR/Gypsy	417	603	241
TOM_I#LTR/Gypsy	6112	18496	12220
TOM_LTR#LTR/Gypsy	474	923	284
TRANSPAC_I#LTR/Gypsy	4590	12331	6700
TRANSPAC_LTR#LTR/Gypsy	330	661	700
TV1I#LTR/Gypsy	5963	19993	22190
TV1LTR#LTR/Gypsy	452	571	428
Ulysses_I#LTR/Gypsy	6381	12889	33859
Ulysses_LTR#LTR/Gypsy	2136	6097	5721
ZAM_I#LTR/Gypsy	7490	16540	13876
ZAM_LTR#LTR/Gypsy	472	523	344
BATUMI_I#LTR/Pao	7963	16035	10796
BATUMI_LTR#LTR/Pao	272	449	294
BEL_I#LTR/Pao	5404	11457	27696
BEL_LTR#LTR/Pao	361	405	267
DIVER2_I#LTR/Pao	4147	13546	17749
DIVER2_LTR#LTR/Pao	385	1000	393
DIVER_I#LTR/Pao	5643	8106	13785
DIVER_LTR#LTR/Pao	224	213	44
MAX_I#LTR/Pao	7914	46263	221094
MAX_LTR#LTR/Pao	321	681	191
NINJA_I#LTR/Pao	6011	9266	17762
NINJA_LTR#LTR/Pao	317	573	283
ROOA_I#LTR/Pao	6849	12716	11156
ROOA_LTR#LTR/Pao	386	586	809
ROO_I#LTR/Pao	8256	23107	14587
ROO_LTR#LTR/Pao	428	2291	1202
TRAM_I#LTR/Pao	2708	6010	11937
TRAM_LTR#LTR/Pao	372	649	127
AT_rich#Low_complexity/Low_complexity	300	66	10
GC_rich#Low_complexity/Low_complexity	300	4	1
Helitron1_DM#RC/Helitron	564	516	228
DGRSAT1#Satellite/Satellite	189	199	145
DGYSAT1#Satellite/Satellite	185	152	85
DSAT#Satellite/Satellite	182	191	72
DTSAT1#Satellite/Satellite	181	425	124
HETRP_DM#Satellite/Satellite	1872	5335	1771
TANSAT_DB#Satellite/Satellite	188	236	71
AY1_DH#Other/Other	690	741	450
DMRP1#Other/Other	346	346	545
DMRPR#Other/Other	285	783	290
DMR_DV#Other/Other	369	700	254
INV2j_DB#DNA/P	889	912	544
TLD1#LTR/Gypsy	196	1815	404
TLD2#LTR/Gypsy	218	2657	447
KBOC_DB#DNA/P	3300	7978	5864
Transib4_DP#DNA/CMC-Transib	1334	2637	1607
Transib5#DNA/CMC-Transib	3001	7933	2895
TransibN1_DP#DNA/CMC-Transib	1194	1871	2012
TransibN2_DP#DNA/CMC-Transib	40	21	4
TransibN3_DP#DNA/CMC-Transib	1547	2530	1815
TransibN4_DP#DNA/CMC-Transib	400	3633	29516
TransibN5_DP#DNA/CMC-Transib	1468	5293	6024
R2_DA#Non-LTR_retrotransposon/R2	1785	2317	2488
MARWOLEN1#DNA/TcMar-Tc1	1643	10547	2202
TAHRE#Non-LTR_retrotransposon/Jockey	10463	19285	10248
TABOR_DA-I#LTR/Gypsy	6388	9792	6486
TABOR_DA-LTR#LTR/Gypsy	451	595	604
Polinton-1_DY#DNA/Maverick	14782	44834	42086
Rehavkus-1_DA#DNA/MULE-NOF	6401	20209	9214
Rehavkus-1_DY#DNA/MULE-NOF	5919	15836	8051
FROGGER_I#LTR/Copia	2077	4971	14861
FROGGER_LTR#LTR/Copia	203	220	66
QUASIMODO2-I_DM#LTR/Gypsy	5500	18773	31106
QUASIMODO2-LTR_DM#LTR/Gypsy	498	560	294
DNAREP1_DYak#RC/Helitron	793	5471	1038
Helitron-2N1_DVir#RC/Helitron	928	1503	1055
Helitron-1_DYak#RC/Helitron	9848	35425	23970
Helitron-1_DVir#RC/Helitron	8816	20834	9420
Helitron-2_DVir#RC/Helitron	9141	107940	30223
Helitron-1N1_DVir#RC/Helitron	519	921	495
piggyBac-N1_DWil#DNA/PiggyBac	658	1142	455
CR1-1_DWil#Non-LTR_retrotransposon/CR1	4718	9146	5432
MINIME_DN#Non-LTR_retrotransposon/MINIME_DN	1218	1453	631
HET-A_DV#Non-LTR_retrotransposon/Jockey	6192	28736	47135
Penelope1_Dw#Non-LTR_retrotransposon/Penelope	2789	4726	3511
Penelope2_Dw#Non-LTR_retrotransposon/Penelope	2798	4854	2074
Helena_Ds#Non-LTR_retrotransposon/Jockey	4912	6727	5632
Chapaev3-1_DW#DNA/CMC-Chapaev-3	3148	13475	29804
Chapaev3-1_DA#DNA/CMC-Chapaev-3	3126	4660	2638
Galileo_DW#DNA/P	4386	11976	6483
Galileo_DM#DNA/P	5989	33040	40858
Galileo_DB#DNA/P	5407	11999	6151
Chimpo_LTR#LTR/Gypsy	207	1506	12101
Chimpo_I#LTR/Gypsy	4059	7498	17828
Helitron-1_DAna#RC/Helitron	1839	5104	36650
Helitron1_Dmoj#RC/Helitron	2125	5278	5960
Transib1_Dwil#DNA/CMC-Transib	3060	4797	2299
Transib1_Dmoj#DNA/CMC-Transib	3058	8356	25923
Mariner1_DYa#DNA/TcMar-Mariner	1299	1184	745
Copia-1-I_DY#LTR/Copia	3967	4540	5067
Copia-1-LTR_DY#LTR/Copia	205	215	96
Copia1-I_DM#LTR/Copia	4124	9948	12239
Copia1-LTR_DM#LTR/Copia	203	343	127
Gypsy1-LTR_DM#LTR/Gypsy	408	699	687
Gypsy2-LTR_DM#LTR/Gypsy	338	416	965
Gypsy1-I_DM#LTR/Gypsy	6727	11136	14331
Gypsy2-I_DM#LTR/Gypsy	6545	10121	8440
Mariner-9_DF#DNA/TcMar-Tc1	1660	2604	2773
Gypsy_6B#LTR/Gypsy	6556	12570	6521
Pifo_I#LTR/Gypsy	8112	12233	8852
Bica_LTR#LTR/Gypsy	164	286	106
Chouto_I#LTR/Gypsy	5715	6381	4657
Bica_I#LTR/Gypsy	4779	6312	4721
Chouto_LTR#LTR/Gypsy	618	4786	678
Pifo_LTR#LTR/Gypsy	444	484	749
LmeSINE1c#SINE/tRNA-Deu-L2	404	2040	591
Gypsy2-LTR_Dpse#LTR/Gypsy	198	167	78
Gypsy17-LTR_Dpse#LTR/Gypsy	1367	1877	714
Gypsy17-LTR_Dya#LTR/Gypsy	199	210	77
Gypsy9-I_Dpse#LTR/Gypsy	4981	5254	9539
Gypsy3-I_Dmoj#LTR/Gypsy	4453	7791	6766
Gypsy15-I_Dpse#LTR/Gypsy	6155	65714	570641
Gypsy13-I_Dya#LTR/Gypsy	5737	8893	8580
Gypsy12-I_Dya#LTR/Gypsy	4402	4570	2658
Gypsy7-LTR_Dpse#LTR/Gypsy	551	654	198
Gypsy5-I_Dpse#LTR/Gypsy	6846	9789	6508
Gypsy18-I_Dya#LTR/Gypsy	7092	13769	7625
Gypsy17-I_Dpse#LTR/Gypsy	11390	19202	26316
Gypsy2-I_Dpse#LTR/Gypsy	4676	9089	18648
Gypsy24-I_Dpse#LTR/Gypsy	6428	16460	15493
Gypsy1-LTR_Dya#LTR/Gypsy	425	412	221
Gypsy21-I_Dpse#LTR/Gypsy	3995	6642	22027
Gypsy4-LTR_Dya#LTR/Gypsy	364	319	264
Gypsy6-LTR_Dmoj#LTR/Gypsy	966	2445	742
Gypsy8-I_Dpse#LTR/Gypsy	7193	10187	15735
Gypsy6-I_Dpse#LTR/Gypsy	4951	27157	185520
Gypsy10-LTR_Dya#LTR/Gypsy	778	1056	870
Gypsy_DG_LTR#LTR/Gypsy	2446	6273	2555
Gypsy4-LTR_Dpse#LTR/Gypsy	1616	3049	4613
Gypsy8-LTR_Dpse#LTR/Gypsy	1488	3460	2318
Gypsy22-LTR_Dpse#LTR/Gypsy	355	222	105
Gypsy20-LTR_Dpse#LTR/Gypsy	168	91	22
Gypsy19-I_Dpse#LTR/Gypsy	5115	8756	6367
Gypsy8-I_Dya#LTR/Gypsy	10311	39077	14149
Gypsy10-LTR_Dpse#LTR/Gypsy	1848	2349	1532
Gypsy16-I_Dya#LTR/Gypsy	4823	23360	79378
Gypsy7-I_Dya#LTR/Gypsy	4163	7224	5509
Gypsy5-LTR_Dya#LTR/Gypsy	1854	4968	3698
Gypsy3-LTR_Dya#LTR/Gypsy	264	421	232
Gypsy10-I_Dpse#LTR/Gypsy	5950	11647	5963
Gypsy11-I_Dya#LTR/Gypsy	6126	12836	14441
Gypsy7-I_Dmoj#LTR/Gypsy	5762	15217	10800
Gypsy21-LTR_Dpse#LTR/Gypsy	230	270	60
Gypsy3-I_Dpse#LTR/Gypsy	6233	10923	8751
Gypsy4-I_Dya#LTR/Gypsy	7680	11076	6015
Gypsy3-LTR_Dpse#LTR/Gypsy	527	376	313
Gypsy15-LTR_Dya#LTR/Gypsy	164	144	55
Gypsy19-LTR_Dpse#LTR/Gypsy	325	357	180
Gypsy12-LTR_Dya#LTR/Gypsy	354	457	674
Gypsy19-LTR_Dya#LTR/Gypsy	533	603	371
Gypsy1-LTR_Dmoj#LTR/Gypsy	1128	1809	1972
Gypsy15-LTR_Dpse#LTR/Gypsy	2568	9483	4458
Gypsy12-I_Dpse#LTR/Gypsy	10352	16628	8602
Gypsy5-LTR_Dmoj#LTR/Gypsy	309	22855	14869
Gypsy1-I_Dpse#LTR/Gypsy	4010	5384	4116
Gypsy14-I_Dya#LTR/Gypsy	3663	7183	6596
Gypsy6-LTR_Dpse#LTR/Gypsy	887	819	751
Gypsy13-LTR_Dpse#LTR/Gypsy	374	1396	3009
Gypsy9-I_Dya#LTR/Gypsy	4457	9098	3512
Gypsy4-LTR_Dmoj#LTR/Gypsy	672	635	422
Gypsy7-LTR_Dmoj#LTR/Gypsy	148	131	111
Gypsy5-I_Dya#LTR/Gypsy	5365	12320	7390
Gypsy2-LTR_Dmoj#LTR/Gypsy	274	350	131
Gypsy2-LTR_Dya#LTR/Gypsy	274	442	218
Gypsy17-I_Dya#LTR/Gypsy	4207	6111	7043
Gypsy18-I_Dpse#LTR/Gypsy	7727	12561	24928
Gypsy12-LTR_Dpse#LTR/Gypsy	579	1210	1027
Gypsy24-LTR_Dpse#LTR/Gypsy	1263	1386	812
Gypsy13-I_Dpse#LTR/Gypsy	7268	34638	49493
Gypsy13-LTR_Dya#LTR/Gypsy	2454	4767	2723
Gypsy11-I_Dpse#LTR/Gypsy	8359	12217	27711
Gypsy5-I_Dmoj#LTR/Gypsy	4593	6801	6038
Gypsy7-LTR_Dya#LTR/Gypsy	205	132	59
Gypsy18-LTR_Dpse#LTR/Gypsy	184	171	147
Gypsy6-I_Dya#LTR/Gypsy	6290	12616	8267
Gypsy16-LTR_Dya#LTR/Gypsy	425	445	175
Gypsy16-LTR_Dpse#LTR/Gypsy	611	608	320
Gypsy9-LTR_Dpse#LTR/Gypsy	762	5726	27997
Gypsy2-I_Dya#LTR/Gypsy	4925	9807	7581
Gypsy9-LTR_Dya#LTR/Gypsy	352	1508	18129
Gypsy4-I_Dpse#LTR/Gypsy	6028	10489	10810
Gypsy18-LTR_Dya#LTR/Gypsy	311	255	126
Gypsy23-LTR_Dpse#LTR/Gypsy	2153	4128	4182
Gypsy1-LTR_Dpse#LTR/Gypsy	201	214	816
Gypsy6-LTR_Dya#LTR/Gypsy	1356	2508	1520
Gypsy11-LTR_Dpse#LTR/Gypsy	817	3017	9060
Gypsy10-I_Dya#LTR/Gypsy	7347	12225	9210
Gypsy4-I_Dmoj#LTR/Gypsy	5106	9016	4111
Gypsy11-LTR_Dya#LTR/Gypsy	514	528	370
Gypsy6-I_Dmoj#LTR/Gypsy	6971	20474	9818
Gypsy14-I_Dpse#LTR/Gypsy	3604	4084	2385
Gypsy_DG_I#LTR/Gypsy	3090	5305	3097
Gypsy3-I_Dya#LTR/Gypsy	2305	3947	2886
Gypsy23-I_Dpse#LTR/Gypsy	8600	11156	10397
Gypsy16-I_Dpse#LTR/Gypsy	6852	10889	14176
Gypsy1-I_Dmoj#LTR/Gypsy	7444	18711	18548
Gypsy20-LTR_Dya#LTR/Gypsy	286	406	316
Gypsy19-I_Dya#LTR/Gypsy	6721	9979	9806
Gypsy20-I_Dpse#LTR/Gypsy	5433	10307	5872
Gypsy7-I_Dpse#LTR/Gypsy	7039	12737	16489
Gypsy14-LTR_Dya#LTR/Gypsy	417	963	3459
Gypsy14-LTR_Dpse#LTR/Gypsy	1179	1926	2277
Gypsy5-LTR_Dpse#LTR/Gypsy	1223	2225	2091
Gypsy8-LTR_Dya#LTR/Gypsy	337	3449	1040
Gypsy22-I_Dpse#LTR/Gypsy	8650	237333	93764
Gypsy3-LTR_Dmoj#LTR/Gypsy	217	153	87
Gypsy20-I_Dya#LTR/Gypsy	6215	21952	15383
Gypsy2-I_Dmoj#LTR/Gypsy	4763	6845	4092
Gypsy1-I_Dya#LTR/Gypsy	4257	4803	4704
Gypsy15-I_Dya#LTR/Gypsy	5028	13916	8163
Hoyak3#DNA/hAT-Pegasus	3271	4843	2513
Hoana8#DNA/hAT-hobo	3123	15073	21353
Hoana3#DNA/hAT-hobo	2542	27139	174381
Hoana5#DNA/hAT-Ac	2373	8700	8837
Hoana7#DNA/hAT-Ac	2519	4925	3589
Hoyak1#DNA/hAT-hobo	2603	17191	8397
Hoana2#DNA/hAT-Ac	2427	5622	10479
Hoyak2#DNA/hAT-Ac	2561	5444	5446
Hoana4#DNA/hAT-hobo	2532	2708	2142
Hoana1#DNA/hAT-hobo	3520	15812	11800
Hoana6#DNA/hAT-Ac	2594	4167	3796
Hopseu2#DNA/hAT-Pegasus	4962	7838	5290
Homo1#DNA/hAT-hobo	2817	12045	19552
Howilli1#DNA/hAT-Ac	2816	4010	2490
Homo11#DNA/hAT-hobo	2511	4744	1916
Hovi1#DNA/hAT-hobo	2690	9503	3501
Homo4#DNA/hAT-hobo	3423	5200	3406
Howilli2#DNA/hAT-hobo	2847	5309	3787
Homo3#DNA/hAT-Ac	2359	3563	5814
Howilli4#DNA/hAT-hobo	2631	4177	1845
Homo6#DNA/hAT-Pegasus	3944	6201	3971
Hovi2#DNA/hAT-hobo	2970	4675	3441
Homo8#DNA/hAT-Ac	2801	11961	10180
Hogri1#DNA/hAT-hobo	3437	4954	2718
Howilli3#DNA/hAT-Ac	2559	4193	14209
Hopers3#DNA/hAT-Pegasus	3063	7305	4374
Homo5#DNA/hAT-Ac	2432	3901	2019
Homo9#DNA/hAT-Ac	2542	4663	2567
Howilli5#DNA/hAT-hobo	2401	3608	2099
Homo10#DNA/hAT-Ac	3922	9721	8038
Homo7#DNA/hAT-Ac	2451	5091	3175
Hopers2#DNA/hAT-hobo	2756	6400	5099
Homo2#DNA/hAT-Ac	2774	6855	13171
Gypsy2-I_DV#LTR/Gypsy	4141	9433	4436
Gypsy1-LTR_DV#LTR/Gypsy	227	531	93
BEL1-I_DV#LTR/Pao	5575	14633	16505
Gypsy2-LTR_DV#LTR/Gypsy	701	4191	7355
hAT-2_DSe#DNA/hAT-Ac	2568	3694	2628
BEL1-LTR_DV#LTR/Pao	426	486	340
Gypsy1-I_DV#LTR/Gypsy	4946	15065	22347
Copia2-LTR_Dpse#LTR/Copia	494	845	1804
BEL2-LTR_Dya#LTR/Pao	310	355	201
BEL1_I_Dpse#LTR/Pao	5439	40283	280378
BEL3-LTR_Dpse#LTR/Pao	319	495	211
BEL2-I_Dmoj#LTR/Pao	5850	7788	7303
BEL2-I_Dya#LTR/Pao	7139	40686	18251
Copia1-LTR_Dpse#LTR/Copia	214	211	247
BEL2-LTR_Dpse#LTR/Pao	207	197	121
BEL1-I_Dmoj#LTR/Pao	4976	6775	8735
BEL1-LTR_Dmoj#LTR/Pao	305	383	104
Copia2-I_Dpse#LTR/Copia	4185	5822	8394
Copia2-LTR_Dmoj#LTR/Copia	351	508	697
BEL1-LTR_Dya#LTR/Pao	214	726	213
BEL3-I_Dpse#LTR/Pao	5868	7634	6941
Jockey-2_DYa#Non-LTR_retrotransposon/Jockey	3616	3605	2256
BEL1_LTR_Dpse#LTR/Pao	300	777	553
Copia2-I_Dmoj#LTR/Copia	4048	6565	4451
Copia1-LTR_Dmoj#LTR/Copia	137	72	38
BEL2-I_Dpse#LTR/Pao	7585	20291	13961
Jockey-1_DYa#Non-LTR_retrotransposon/Jockey	4785	6718	3581
Nobel_I#LTR/Pao	6294	51823	34274
Copia1-I_Dmoj#LTR/Copia	4030	5813	4196
BEL2-LTR_Dmoj#LTR/Pao	372	417	124
Copia1-I_Dpse#LTR/Copia	3027	3316	2380
Harbinger1_DYa#DNA/PIF-Harbinger	2324	4022	2305
BEL1-I_Dya#LTR/Pao	8192	18607	28507
Mariner-2_DYa#DNA/TcMar-Tc1	1630	2729	1495
R1-1_DYa#Non-LTR_retrotransposon/R1	5381	5862	4919
RTE-1_DYa#Non-LTR_retrotransposon/RTE-BovB	2363	2445	2738
LOA#Non-LTR_retrotransposon/LOA	7779	13344	10925
Transib-N1_DYa#DNA/CMC-Transib	1521	14865	4042
Nobel_LTR#LTR/Pao	314	426	204
R1_DPe#Non-LTR_retrotransposon/R1	5444	18365	25117
R1_DSi#Non-LTR_retrotransposon/R1	5434	10614	7212
R1_DYa#Non-LTR_retrotransposon/R1	5513	11019	5716
R1A_DAn#Non-LTR_retrotransposon/R1	5610	9729	5777
R1-2_DGr#Non-LTR_retrotransposon/R1	5678	11872	35730
R1_DMo#Non-LTR_retrotransposon/R1	5931	14132	26164
R1B_DAn#Non-LTR_retrotransposon/R1	5805	13388	15653
TART-1_DWi#Non-LTR_retrotransposon/Jockey	4909	14961	9619
R1_DWi#Non-LTR_retrotransposon/R1	6120	7956	8824
R1_DEr#Non-LTR_retrotransposon/R1	5381	9982	6131
R1-1_DGr#Non-LTR_retrotransposon/R1	5561	12804	36154
R1_DPs#Non-LTR_retrotransposon/R1	5447	20784	24389
R1_DSe#Non-LTR_retrotransposon/R1	5417	10397	6915
R1_DVi#Non-LTR_retrotransposon/R1	5248	6591	4376
R2_DYa#Non-LTR_retrotransposon/R2	3548	7694	4488
R2_DPs#Non-LTR_retrotransposon/R2	3557	5013	5657
R2_DSi#Non-LTR_retrotransposon/R2	3607	6442	3179
R2-1_DWi#Non-LTR_retrotransposon/R2	3550	5837	2860
R2_DPe#Non-LTR_retrotransposon/R2	3533	7486	9958
R2-2_DWi#Non-LTR_retrotransposon/R2	3554	5417	2299
R2_DAn#Non-LTR_retrotransposon/R2	3548	5251	7906
R2_DSe#Non-LTR_retrotransposon/R2	3595	6198	3302
Uhu_DAn#DNA/TcMar-Tc1	1656	4261	1022
Gypsy-25_DYa-I#LTR/Gypsy	4923	8685	6082
Gypsy-5_DWil-I#LTR/Gypsy	7194	16957	11888
Gypsy-1_DGri-I#LTR/Gypsy	5609	8593	7982
Gypsy-27_DWil-I#LTR/Gypsy	5332	8713	5234
Gypsy-7_DVir-I#LTR/Gypsy	6469	10729	7025
Gypsy-2_DWil-LTR#LTR/Gypsy	2521	5184	2324
Gypsy-3_DPer-I#LTR/Gypsy	5851	11882	4316
Gypsy-15_DWil-I#LTR/Gypsy	6323	13085	5038
Gypsy-20_DWil-I#LTR/Gypsy	6632	11389	7018
Gypsy-37_DWil-I#LTR/Gypsy	5489	21137	6472
Gypsy-8_DVir-LTR#LTR/Gypsy	443	550	543
Gypsy-7_DWil-I#LTR/Gypsy	3226	44921	12233
Gypsy-9_DWil-LTR#LTR/Gypsy	158	168	118
Gypsy-19_DWil-I#LTR/Gypsy	4250	8391	7739
Gypsy-34_DWil-LTR#LTR/Gypsy	1800	5626	2216
Gypsy-32_DWil-LTR#LTR/Gypsy	368	560	181
Gypsy-25_DWil-LTR#LTR/Gypsy	436	380	622
Gypsy-11_DWil-I#LTR/Gypsy	4597	9639	5710
Gypsy-21_DWil-LTR#LTR/Gypsy	269	344	106
Gypsy-39_DWil-LTR#LTR/Gypsy	909	1676	823
Gypsy-2_DVir-LTR#LTR/Gypsy	237	276	112
Gypsy-41_DWil-LTR#LTR/Gypsy	442	399	264
Gypsy-23_DWil-LTR#LTR/Gypsy	200	189	99
Gypsy-8_DVir-I#LTR/Gypsy	4420	6087	3321
Gypsy-7_DWil-LTR#LTR/Gypsy	840	2245	2150
Gypsy-21_DYa-LTR#LTR/Gypsy	202	178	52
Gypsy-5_DWil-LTR#LTR/Gypsy	513	718	787
Gypsy-28_DWil-LTR#LTR/Gypsy	289	244	354
Gypsy-10_DWil-LTR#LTR/Gypsy	268	299	148
Gypsy-3_DPer-LTR#LTR/Gypsy	2254	2646	2111
Gypsy-14_DWil-LTR#LTR/Gypsy	805	675	534
Gypsy-1_DWil-LTR#LTR/Gypsy	2614	3560	2021
Gypsy-18_DWil-I#LTR/Gypsy	5607	17253	17104
Gypsy-31_DWil-I#LTR/Gypsy	7641	24686	12548
Gypsy-25_DYa-LTR#LTR/Gypsy	237	239	132
Gypsy-36_DWil-LTR#LTR/Gypsy	295	412	306
Gypsy-38_DWil-I#LTR/Gypsy	3062	3873	3474
Gypsy-33_DWil-I#LTR/Gypsy	4207	6445	7348
Gypsy-40_DWil-LTR#LTR/Gypsy	261	156	86
Gypsy-16_DWil-LTR#LTR/Gypsy	222	150	119
Gypsy-2_DWil-I#LTR/Gypsy	5615	9253	5317
Gypsy-6_DWil-I#LTR/Gypsy	5461	7882	5619
Gypsy-35_DWil-I#LTR/Gypsy	5330	7766	10693
Gypsy-22_DYa-I#LTR/Gypsy	4420	5683	2657
Gypsy-8_DWil-I#LTR/Gypsy	5298	8362	9632
Gypsy-24_DWil-I#LTR/Gypsy	6078	13270	16042
Gypsy-12_DWil-LTR#LTR/Gypsy	285	693	352
Gypsy-5_DGri-LTR#LTR/Gypsy	167	545	285
Gypsy-38_DWil-LTR#LTR/Gypsy	802	2548	8770
Gypsy-18_DWil-LTR#LTR/Gypsy	2208	5963	2773
Gypsy-14_DWil-I#LTR/Gypsy	7978	15001	9571
Gypsy-21_DYa-I#LTR/Gypsy	5041	9406	4482
Gypsy-17_DWil-LTR#LTR/Gypsy	218	1138	209
Gypsy-28_DWil-I#LTR/Gypsy	4226	7273	10463
Gypsy-30_DWil-LTR#LTR/Gypsy	367	199	145
Gypsy-21_DWil-I#LTR/Gypsy	4264	5409	3242
Gypsy-22_DWil-LTR#LTR/Gypsy	370	509	217
Gypsy-4_DPer-LTR#LTR/Gypsy	909	1070	289
Gypsy-35_DWil-LTR#LTR/Gypsy	155	5627	1167
Gypsy-4_DWil-I#LTR/Gypsy	5204	11986	13034
Gypsy-1_DWil-I#LTR/Gypsy	4671	5976	4293
Gypsy-4_DPer-I#LTR/Gypsy	3411	5225	2798
Gypsy-26_DWil-I#LTR/Gypsy	4613	6602	4681
Gypsy-3_DWil-LTR#LTR/Gypsy	245	476	300
Gypsy-10_DWil-I#LTR/Gypsy	4435	20573	8288
Gypsy-29_DWil-LTR#LTR/Gypsy	439	890	266
Gypsy-24_DWil-LTR#LTR/Gypsy	168	96	72
Gypsy-23_DYa-LTR#LTR/Gypsy	263	231	394
Gypsy-37_DWil-LTR#LTR/Gypsy	2321	6784	1689
Gypsy-7_DVir-LTR#LTR/Gypsy	390	562	275
Gypsy-16_DWil-I#LTR/Gypsy	4867	9030	11164
Gypsy-24_DYa-LTR#LTR/Gypsy	214	656	444
Gypsy-8_DWil-LTR#LTR/Gypsy	242	653	288
Gypsy-31_DWil-LTR#LTR/Gypsy	248	312	344
Gypsy-33_DWil-LTR#LTR/Gypsy	304	597	588
Gypsy-12_DWil-I#LTR/Gypsy	6088	13193	21048
Gypsy-5_DGri-I#LTR/Gypsy	7661	21879	37351
Gypsy-26_DWil-LTR#LTR/Gypsy	172	484	489
Gypsy-1_DGri-LTR#LTR/Gypsy	1503	1772	810
Gypsy-4_DWil-LTR#LTR/Gypsy	278	523	297
Gypsy-9_DWil-I#LTR/Gypsy	4258	4943	3693
Gypsy-3_DWil-I#LTR/Gypsy	3613	8846	5715
Gypsy-24_DYa-I#LTR/Gypsy	5304	8726	6249
Gypsy-17_DWil-I#LTR/Gypsy	4717	46689	12803
Gypsy-27_DWil-LTR#LTR/Gypsy	291	692	245
Gypsy-13_DWil-LTR#LTR/Gypsy	370	565	722
Gypsy-13_DWil-I#LTR/Gypsy	5038	10055	6901
Gypsy-6_DWil-LTR#LTR/Gypsy	231	319	208
Gypsy-22_DYa-LTR#LTR/Gypsy	350	991	373
Gypsy-36_DWil-I#LTR/Gypsy	5346	9525	7095
Gypsy-9_DVir-I#LTR/Gypsy	4183	6963	3803
Gypsy-30_DWil-I#LTR/Gypsy	4497	8049	6700
Gypsy-20_DWil-LTR#LTR/Gypsy	265	454	90
Gypsy-25_DWil-I#LTR/Gypsy	4312	4746	3655
Gypsy-2_DVir-I#LTR/Gypsy	7177	11551	5813
Gypsy-2_DPer-LTR#LTR/Gypsy	110	143	51
Gypsy-15_DWil-LTR#LTR/Gypsy	275	232	187
Gypsy-19_DWil-LTR#LTR/Gypsy	286	1513	236
Gypsy-2_DPer-I#LTR/Gypsy	4308	10662	9865
Gypsy-9_DVir-LTR#LTR/Gypsy	416	367	268
Gypsy-23_DWil-I#LTR/Gypsy	3051	8137	6095
Gypsy-22_DWil-I#LTR/Gypsy	6217	14840	10129
Gypsy-29_DWil-I#LTR/Gypsy	5762	26382	28115
Gypsy-34_DWil-I#LTR/Gypsy	5633	10552	14660
Gypsy-32_DWil-I#LTR/Gypsy	4218	7371	17811
Gypsy-23_DYa-I#LTR/Gypsy	4674	9312	6379
Gypsy-11_DWil-LTR#LTR/Gypsy	214	209	331
Copia-6_DWil-I#LTR/Copia	4258	7817	8541
Copia-2_DWil-I#LTR/Copia	3873	5658	3198
Copia-4_DWil-I#LTR/Copia	3657	15625	8835
Copia-1_DYa-I#LTR/Copia	4042	34666	8566
Copia-5_DWil-LTR#LTR/Copia	250	196	62
Copia-5_DWil-I#LTR/Copia	4673	52716	20514
Copia-4_DGri-LTR#LTR/Copia	168	135	33
Copia-1_DVir-I#LTR/Copia	4151	6600	4106
Copia-1_DWil-LTR#LTR/Copia	203	198	116
Copia-3_DWil-LTR#LTR/Copia	240	389	113
Copia-4_DGri-I#LTR/Copia	4120	9050	6459
Copia-1_DWil-I#LTR/Copia	4043	6408	12235
Copia-3_DWil-I#LTR/Copia	4052	6958	3585
Copia-1_DPer-I#LTR/Copia	4739	15165	10884
Copia-1_DPer-LTR#LTR/Copia	245	424	125
Copia-1_DVir-LTR#LTR/Copia	195	148	84
Copia-6_DWil-LTR#LTR/Copia	196	244	220
Copia-2_DWil-LTR#LTR/Copia	163	314	92
Copia-4_DWil-LTR#LTR/Copia	201	137	164
Copia-1_DYa-LTR#LTR/Copia	213	460	135
BEL-12_DWil-LTR#LTR/Pao	353	435	396
BEL-5_DWil-I#LTR/Pao	5821	7036	4632
BEL-6_DWil-LTR#LTR/Pao	409	942	756
BEL-17_DWil-LTR#LTR/Pao	288	459	142
BEL-8_DWil-LTR#LTR/Pao	415	389	233
BEL-2_DWil-I#LTR/Pao	4144	12977	8578
BEL-15_DWil-I#LTR/Pao	5068	5719	3454
BEL-9_DWil-I#LTR/Pao	5443	11902	13814
BEL-14_DWil-I#LTR/Pao	5460	6357	3688
BEL-4_DWil-I#LTR/Pao	5548	29678	14313
BEL-5_DWil-LTR#LTR/Pao	448	522	727
BEL-7_DWil-I#LTR/Pao	5745	10489	6908
BEL-3_DGri-I#LTR/Pao	5418	7211	10445
BEL-12_DWil-I#LTR/Pao	5911	8261	4979
BEL-14_DWil-LTR#LTR/Pao	493	1047	856
BEL-3_DWil-LTR#LTR/Pao	332	205	135
BEL-10_DWil-I#LTR/Pao	8555	23713	27155
BEL-11_DWil-LTR#LTR/Pao	210	398	147
BEL-1_DWil-LTR#LTR/Pao	381	343	337
BEL-6_DWil-I#LTR/Pao	6110	15577	8073
BEL-7_DWil-LTR#LTR/Pao	128	76	24
BEL-1_DWil-I#LTR/Pao	8506	47654	25979
BEL-16_DWil-I#LTR/Pao	5112	9199	5880
BEL-4_DWil-LTR#LTR/Pao	438	553	181
BEL-3_DWil-I#LTR/Pao	5602	7916	5775
BEL-3_DGri-LTR#LTR/Pao	226	390	169
BEL-1_DPer-I#LTR/Pao	7788	19549	21082
BEL-9_DWil-LTR#LTR/Pao	349	617	346
BEL-15_DWil-LTR#LTR/Pao	215	152	88
BEL-10_DWil-LTR#LTR/Pao	299	3914	1083
BEL-16_DWil-LTR#LTR/Pao	380	558	173
BEL-8_DWil-I#LTR/Pao	5591	9899	5600
BEL-2_DWil-LTR#LTR/Pao	332	907	143
BEL-11_DWil-I#LTR/Pao	5963	13195	11979
BEL-1_DPer-LTR#LTR/Pao	367	746	5701
Mariner-2_DMac#DNA/TcMar-Mariner	459	434	312
Mariner-1_DMac#DNA/TcMar-Mariner	478	473	187
Dbusck2cons#DNA/TcMar-Mariner	504	627	407
Dmedtr1cons#DNA/TcMar-Mariner	491	713	166
Dorna1cons#DNA/TcMar-Mariner	507	798	363
Dbuski1cons#DNA/TcMar-Mariner	492	743	222
Dparam2cons#DNA/TcMar-Mariner	490	489	278
Daraw1cons#DNA/TcMar-Mariner	500	388	133
Dtripu2cons#DNA/TcMar-Mariner	501	417	245
Dneoca1cons#DNA/TcMar-Mariner	492	380	384
Dtripu1cons#DNA/TcMar-Mariner	491	2073	614
Dparam1cons#DNA/TcMar-Mariner	489	827	277
Dmedpu1cons#DNA/TcMar-Mariner	492	365	393
Dneoca1#DNA/TcMar-Mariner	415	449	227
Dpauli6#DNA/TcMar-Mariner	493	738	225
Dmedpu27#DNA/TcMar-Mariner	317	218	208
Dparag30#DNA/TcMar-Mariner	422	813	862
Dparag19#DNA/TcMar-Mariner	447	731	163
Dneoca19#DNA/TcMar-Mariner	430	300	180
Dcardi9#DNA/TcMar-Mariner	473	327	154
Dpalli7#DNA/TcMar-Mariner	291	648	658
Dmacul5#DNA/TcMar-Mariner	495	742	199
Copia-1_DTa-I#LTR/Copia	4177	5896	12308
Copia-1_DTa-LTR#LTR/Copia	156	393	585
Gypsy-8_DTa-LTR#LTR/Gypsy	215	226	83
Gypsy-5_DTa-LTR#LTR/Gypsy	791	1848	784
Gypsy-9_DTa-LTR#LTR/Gypsy	319	253	114
Gypsy-6_DTa-I#LTR/Gypsy	7368	12063	14605
Gypsy-3_DTa-I#LTR/Gypsy	4097	14732	16148
Gypsy-4_DTa-I#LTR/Gypsy	3799	6409	7723
Gypsy-6_DTa-LTR#LTR/Gypsy	517	1322	351
Gypsy-3_DTa-LTR#LTR/Gypsy	308	349	279
Gypsy-4_DTa-LTR#LTR/Gypsy	248	453	261
Gypsy-7_DTa-I#LTR/Gypsy	7569	15568	11613
Gypsy-5_DTa-I#LTR/Gypsy	7380	15872	11565
Gypsy-9_DTa-I#LTR/Gypsy	5608	15160	13268
Gypsy-8_DTa-I#LTR/Gypsy	4222	9931	16295
Gypsy-7_DTa-LTR#LTR/Gypsy	1808	5694	14273
BEL-11_DTa-I#LTR/Pao	6469	10762	35136
BEL-12_DTa-LTR#LTR/Pao	244	263	87
BEL-4_DTa-LTR#LTR/Pao	227	477	119
BEL-3_DTa-LTR#LTR/Pao	327	407	205
BEL-11_DTa-LTR#LTR/Pao	280	608	218
BEL-10_DTa-I#LTR/Pao	5774	77428	586978
BEL-12_DTa-I#LTR/Pao	5661	6711	6986
BEL-8_DTa-I#LTR/Pao	5755	9956	17564
BEL-9_DTa-LTR#LTR/Pao	302	8716	945
BEL-3_DTa-I#LTR/Pao	6076	8071	13015
BEL-9_DTa-I#LTR/Pao	4211	7535	18637
BEL-6_DTa-I#LTR/Pao	5537	10742	4878
BEL-7_DTa-LTR#LTR/Pao	358	479	275
BEL-5_DTa-LTR#LTR/Pao	297	284	265
BEL-8_DTa-LTR#LTR/Pao	311	612	291
BEL-7_DTa-I#LTR/Pao	5617	6617	6072
BEL-13_DTa-LTR#LTR/Pao	237	221	44
BEL-13_DTa-I#LTR/Pao	5845	8977	5640
BEL-10_DTa-LTR#LTR/Pao	303	329	95
BEL-5_DTa-I#LTR/Pao	5871	10440	13893
BEL-6_DTa-LTR#LTR/Pao	134	133	52
BEL-4_DTa-I#LTR/Pao	8132	17446	22852
Harbinger-1_DW#DNA/PIF-Harbinger	3689	8471	5535
Harbinger-1N1_DK#DNA/PIF-Harbinger	732	679	355
Harbinger-1N1_DRh#DNA/PIF-Harbinger	754	1429	558
Harbinger-2_DRh#DNA/PIF-Harbinger	1441	3128	2134
Harbinger-N1_DPe#DNA/PIF-Harbinger	1071	1402	902
Harbinger-1_DF#DNA/PIF-Harbinger	2066	24829	40022
Harbinger-2B_DRh#DNA/PIF-Harbinger	2950	4539	2773
Harbinger-1N1_DF#DNA/PIF-Harbinger	679	597	246
Harbinger-1_DK#DNA/PIF-Harbinger	2631	3027	2120
Harbinger-1_DRh#DNA/PIF-Harbinger	2498	6735	3800
BEL-3_DRh-I#LTR/Pao	5282	9272	17700
Jockey-1_DRh#Non-LTR_retrotransposon/Jockey	4322	8240	5032
Gypsy-17_DRh-LTR#LTR/Gypsy	375	378	249
Penelope-1_DRh#Non-LTR_retrotransposon/Penelope	2733	5932	4290
Gypsy-10_DRh-LTR#LTR/Gypsy	1290	6703	59238
Mariner-11_DRh#DNA/TcMar-Tc1	1662	6216	2001
Gypsy-1_DRh-LTR#LTR/Gypsy	284	1244	238
Gypsy-8_DRh-LTR#LTR/Gypsy	687	903	443
Mariner-6_DRh#DNA/TcMar-Tc1	1722	2652	1385
BEL-7_DRh-I#LTR/Pao	7686	21319	19238
P-2_DRh#DNA/P	1404	2332	785
Mariner-2_DRh#DNA/TcMar-Tc1	1639	2487	1860
BEL-5_DRh-I#LTR/Pao	4982	9694	26636
Gypsy-3_DRh-I#LTR/Gypsy	6096	14005	5945
PARISa_DRh#DNA/TcMar-Tc1	1031	5231	2191
Gypsy-9_DRh-LTR#LTR/Gypsy	1053	3708	3532
Transib-8_DRh#DNA/CMC-Transib	1060	5024	1639
Transib-1_DRh#DNA/CMC-Transib	2996	5575	3417
Transib-6_DRh#DNA/CMC-Transib	1866	5402	3789
Gypsy-11_DRh-I#LTR/Gypsy	6527	67225	583767
CR1-1_DRh#Non-LTR_retrotransposon/CR1	4493	6430	4804
Gypsy-6_DRh-I#LTR/Gypsy	3668	11716	14144
Gypsy-12_DRh-LTR#LTR/Gypsy	1070	905	718
BEL-1_DRh-I#LTR/Pao	5720	15920	25139
Mariner-16_DRh#DNA/TcMar-Tc1	1663	3372	3118
Mariner-7_DRh#DNA/TcMar-Tc1	1659	3230	1953
CR1-2_DRh#Non-LTR_retrotransposon/CR1	4397	8315	5547
Jockey-2_DRh#Non-LTR_retrotransposon/Jockey	4663	13534	19991
Mariner-10_DRh#DNA/TcMar-Tc1	1629	2695	1980
BEL-1_DRh-LTR#LTR/Pao	291	232	109
Jockey-4_DRh#Non-LTR_retrotransposon/Jockey	4710	7669	5742
Gypsy-8_DRh-I#LTR/Gypsy	5881	10019	5438
Transib-5_DRh#DNA/CMC-Transib	1443	4447	3545
Helitron-4_DRh#RC/Helitron	4898	7349	4780
BEL-2_DRh-LTR#LTR/Pao	279	213347	78322
Gypsy-1_DRh-I#LTR/Gypsy	2617	4254	12711
Mariner-20_DRh#DNA/TcMar-Tc1	865	1348	1246
Mariner-5_DRh#DNA/TcMar-Tc1	1636	2606	1378
Gypsy-10_DRh-I#LTR/Gypsy	5031	5771	5757
Helitron-6_DRh#RC/Helitron	6534	30576	230513
Gypsy-2_DRh-I#LTR/Gypsy	5038	13387	5636
Gypsy-14_DRh-LTR#LTR/Gypsy	1631	1916	6875
Jockey-9_DRh#Non-LTR_retrotransposon/Jockey	3542	5429	16766
hAT-2_DRh#DNA/hAT-hobo	2517	3511	2538
Jockey-7_DRh#Non-LTR_retrotransposon/Jockey	4669	5385	5717
Helitron-9_DRh#RC/Helitron	4989	6852	4808
RTEX-1_DRh#LTR/RTEX	4717	6946	6724
Gypsy-13_DRh-I#LTR/Gypsy	7474	10947	9678
Gypsy-15_DRh-LTR#LTR/Gypsy	1123	1290	578
Gypsy-3_DRh-LTR#LTR/Gypsy	1756	3227	1401
BEL-4_DRh-LTR#LTR/Pao	299	229	121
Mariner-13_DRh#DNA/TcMar-Tc1	941	5000	1209
Gypsy-6_DRh-LTR#LTR/Gypsy	120	114	84
P-1_DRh#DNA/P	4469	9851	3689
BEL-2_DRh-I#LTR/Pao	5266	8391	15370
Mariner-15_DRh#DNA/TcMar-Tc1	1663	2469	1731
Gypsy-5_DRh-LTR#LTR/Gypsy	210	288	147
Gypsy-7_DRh-LTR#LTR/Gypsy	167	329	136
BEL-6_DRh-LTR#LTR/Pao	287	269	173
Gypsy-11_DRh-LTR#LTR/Gypsy	1699	3135	9847
Mariner-9_DRh#DNA/TcMar-Tc1	1663	3302	3426
Helitron-5_DRh#RC/Helitron	4612	8713	20708
hAT-6_DRh#DNA/hAT-Ac	743	1380	2928
Mariner-19_DRh#DNA/TcMar-Tc1	871	942	864
Mariner-17_DRh#DNA/TcMar-Tc1	1665	2798	3595
BEL-4_DRh-I#LTR/Pao	5794	7076	5724
Jockey-6_DRh#Non-LTR_retrotransposon/Jockey	3891	5257	7316
Helitron-3_DRh#RC/Helitron	4124	5702	3895
Jockey-10_DRh#Non-LTR_retrotransposon/Jockey	4695	8920	15841
Transib-4_DRh#DNA/CMC-Transib	1365	2410	1129
Gypsy-2_DRh-LTR#LTR/Gypsy	328	360	540
hAT-5N1_DRh#DNA/hAT-Ac	469	457	187
Gypsy-15_DRh-I#LTR/Gypsy	6048	6687	9637
Gypsy-13_DRh-LTR#LTR/Gypsy	840	1004	356
Gypsy-5_DRh-I#LTR/Gypsy	4665	10696	7305
Mariner-14_DRh#DNA/TcMar-Tc1	1666	3201	4029
Mariner-4_DRh#DNA/TcMar-Tc1	1664	2100	1058
Gypsy-16_DRh-LTR#LTR/Gypsy	225	482	130
Helitron-7_DRh#RC/Helitron	2908	6851	2488
BEL-7_DRh-LTR#LTR/Pao	321	519	500
Gypsy-16_DRh-I#LTR/Gypsy	4074	6237	10810
BEL-6_DRh-I#LTR/Pao	4771	11936	12744
Gypsy-4_DRh-I#LTR/Gypsy	6232	22476	22320
CR1-5_DRh#Non-LTR_retrotransposon/CR1	4483	9642	7322
Jockey-3_DRh#Non-LTR_retrotransposon/Jockey	4739	8908	5374
Loa-1_DRh#Non-LTR_retrotransposon/LOA	5045	12497	46856
Transib-3_DRh#DNA/CMC-Transib	1489	1729	731
R1-1_DRh#Non-LTR_retrotransposon/R1	5004	6745	4080
CR1-4_DRh#Non-LTR_retrotransposon/CR1	3203	4553	5789
P-3_DRh#DNA/P	1566	2129	1537
Kiri-1_DRh#LTR/Kiri	4450	8924	6310
hAT-4_DRh#DNA/hAT-hobo	2680	5375	5538
Mariner-18_DRh#DNA/TcMar-Tc1	1536	4080	2702
Helitron-2_DRh#RC/Helitron	5713	9093	5911
Jockey-8_DRh#Non-LTR_retrotransposon/Jockey	3455	3696	2668
Gypsy-7_DRh-I#LTR/Gypsy	6679	7682	14458
hAT-5_DRh#DNA/hAT-Ac	2022	2823	1787
Gypsy-12_DRh-I#LTR/Gypsy	4893	11212	8346
Mariner-12_DRh#DNA/TcMar-Tc1	1640	1971	1225
hAT-1_DRh#DNA/hAT-Ac	1451	6940	3221
BEL-3_DRh-LTR#LTR/Pao	326	370	151
Transib-7_DRh#DNA/CMC-Transib	1082	13284	18279
Mariner-3_DRh#DNA/TcMar-Mariner	1244	826	529
Helitron-8_DRh#RC/Helitron	3042	3754	3256
Mariner-8_DRh#DNA/TcMar-Tc1	1612	5822	1986
Gypsy-14_DRh-I#LTR/Gypsy	5487	7559	5098
Gypsy-9_DRh-I#LTR/Gypsy	6359	8598	11678
Gypsy-4_DRh-LTR#LTR/Gypsy	491	689	270
hAT-3_DRh#DNA/hAT-hobo	1490	3515	2089
Transib-2_DRh#DNA/CMC-Transib	1596	3165	2257
Gypsy-17_DRh-I#LTR/Gypsy	5326	6176	9075
BEL-5_DRh-LTR#LTR/Pao	106	972	206
Mariner-9_DBp#DNA/TcMar-Tc1	1658	1901	1395
Mariner-13_DBp#DNA/TcMar-Mariner	1290	1845	1626
Mariner-2_DEl#DNA/TcMar-Mariner	1262	1573	764
Mariner-1_Dro#DNA/TcMar-Mariner	1311	1987	994
Mariner-23_DF#DNA/TcMar-Tc1	1664	5101	8471
Mariner-5_DF#DNA/TcMar-Tc1	1623	2338	1260
Mariner-22_DF#DNA/TcMar-Tc1	1650	2301	2964
Mariner-13_DK#DNA/TcMar-Tc1	1635	7794	2964
Mariner-6_DAn#DNA/TcMar-Tc1	1733	2478	1742
Mariner-2_DBi#DNA/TcMar-Tc1	1319	2876	4982
Mariner-15_DAn#DNA/TcMar-Tc1	1643	4633	2306
Mariner-17_DK#DNA/TcMar-Tc1	1642	2448	2882
Mariner-15_DF#DNA/TcMar-Tc1	1650	1785	941
Mariner-12_DBp#DNA/TcMar-Tc1	1632	1937	1015
Mariner-3_DK#DNA/TcMar-Tc1	1628	3902	7628
Mariner-3_DT#DNA/TcMar-Mariner	1630	2409	1445
Mariner-1_DPe#DNA/TcMar-Mariner	1295	1429	1746
Mariner-28_DF#DNA/TcMar-Tc1	943	1355	809
Mariner-10_DEl#DNA/TcMar-Tc1	1532	2939	2002
Mariner-6_DEl#DNA/TcMar-Mariner	332	348	485
Mariner-3_DYa#DNA/TcMar-Tc1	1405	1608	865
Mariner-2_DAn#DNA/TcMar-Tc1	2501	5244	2458
Mariner-18_DF#DNA/TcMar-Tc1	1648	6600	1947
Mariner-29_DF#DNA/TcMar-Mariner	938	2681	909
Mariner-5_DBi#DNA/TcMar-Mariner	1115	1418	1561
Mariner-6_DBp#DNA/TcMar-Tc1	1679	5873	2429
Mariner-6_DK#DNA/TcMar-Tc1	1569	2239	1291
Mariner-10_DK#DNA/TcMar-Tc1	1654	1993	1935
Mariner-1_DT#DNA/TcMar-Tc1	1639	1913	987
Mariner-1_DK#DNA/TcMar-Tc1	1641	2432	1325
Mariner-11_DF#DNA/TcMar-Tc1	1660	4028	4359
Mariner-10_DAn#DNA/TcMar-Tc1	1604	3389	7185
Mariner-24_DF#DNA/TcMar-Tc1	1653	9065	8423
Mariner-4_DF#DNA/TcMar-Tc1	1709	2973	1707
Mariner-19_DAn#DNA/TcMar-Tc1	1141	2224	7296
Mariner-7_DYa#DNA/TcMar-Tc1	1673	4838	1992
Mariner-3_DF#DNA/TcMar-Mariner	939	1197	970
Mariner-14_DK#DNA/TcMar-Tc1	1663	3782	2831
Mariner-3_DEl#DNA/TcMar-Tc1	785	1349	877
Mariner-1_DEu#DNA/TcMar-Tc1	1633	2206	1224
Mariner-8_DF#DNA/TcMar-Tc1	1647	2171	967
Mariner-14_DF#DNA/TcMar-Tc1	1649	2279	1272
Mariner-11_DBp#DNA/TcMar-Tc1	1643	3119	1135
Mariner-5_DAn#DNA/TcMar-Tc1	1635	2456	1905
Mariner-2_DBp#DNA/TcMar-Tc1	1284	1313	3081
Mariner-1_DBi#DNA/TcMar-Mariner	1327	3880	1764
Mariner-2_DK#DNA/TcMar-Tc1	1649	2446	900
Mariner-1_DAr#DNA/TcMar-Mariner	430	357	126
Mariner-9_DK#DNA/TcMar-Tc1	1763	2278	1601
Mariner-2_Dro#DNA/TcMar-Mariner	1328	3821	1946
Mariner-6_DY#DNA/TcMar-Tc1	1661	2107	1358
Mariner-1_DF#DNA/TcMar-Mariner	1290	2013	2358
Mariner-11_DAn#DNA/TcMar-Tc1	1650	2658	2538
Mariner-19_DF#DNA/TcMar-Tc1	935	60112	574563
Mariner-12_DAn#DNA/TcMar-Tc1	1646	2184	1185
Mariner-11_DK#DNA/TcMar-Tc1	1630	3737	2444
Mariner-7N1_DEl#DNA/TcMar-Mariner	554	376	450
Mariner-20_DAn#DNA/TcMar-Tc1	1191	1653	1785
Mariner-4_DBi#DNA/TcMar-Mariner	944	3714	20554
Mariner-5_DEu#DNA/TcMar-Tc1	1639	3315	3818
Mariner-20_DK#DNA/TcMar-Tc1	1664	2236	1918
Mariner-10_DF#DNA/TcMar-Tc1	1647	1881	1305
Mariner-8_DBp#DNA/TcMar-Tc1	1229	3405	1242
Mariner-4_DEu#DNA/TcMar-Tc1	1252	1045	2524
Mariner-2_DEu#DNA/TcMar-Tc1	1670	5019	2244
Mariner-7_DBi#DNA/TcMar-Tc1	1727	1992	1029
Mariner-16_DAn#DNA/TcMar-Tc1	941	790	624
Mariner-13_DF#DNA/TcMar-Tc1	1352	1682	1970
Mariner-18_DAn#DNA/TcMar-Tc1	930	6443	13358
Mariner-5_DK#DNA/TcMar-Tc1	1292	1300	3455
Mariner-5_DBp#DNA/TcMar-Tc1	1638	2925	4517
Mariner-22_DK#DNA/TcMar-Tc1	1666	5353	4775
Mariner-2_DEr#DNA/TcMar-Mariner	1628	1240	694
Mariner-3_Dro#DNA/TcMar-Tc1	1648	11199	5250
Mariner-4_DAn#DNA/TcMar-Tc1	1640	3275	1740
Mariner-8_DK#DNA/TcMar-Mariner	1646	6533	2560
Mariner-1_DBp#DNA/TcMar-Tc1	1605	5578	2150
Mariner-7_DEl#DNA/TcMar-Mariner	1255	1179	707
Mariner-1_DVi#DNA/TcMar-Tc1	1703	3163	1170
Mariner-27_DF#DNA/TcMar-Tc1	1636	3283	5184
Mariner-20_DF#DNA/TcMar-Tc1	1539	2562	2245
Mariner-1_DGr#DNA/TcMar-Tc1	1648	5269	2668
Mariner-15_DK#DNA/TcMar-Tc1	1646	2244	2477
Mariner-4_DY#DNA/TcMar-Tc1	1292	4663	2834
Mariner-7_DF#DNA/TcMar-Tc1	1637	2612	2040
Mariner-12_DK#DNA/TcMar-Tc1	1661	3673	1942
Mariner-13_DAn#DNA/TcMar-Tc1	1641	3088	1075
Mariner-1_DSim#DNA/TcMar-Tc1	1661	3137	1005
Mariner-4_DBp#DNA/TcMar-Tc1	1648	4489	1682
Mariner-18_DK#DNA/TcMar-Tc1	1622	8014	11812
Mariner-3_DBi#DNA/TcMar-Tc1	1650	4631	1662
Mariner-8_DEl#DNA/TcMar-Mariner	932	1091	601
Mariner-9_DAn#DNA/TcMar-Tc1	1645	2780	1099
Mariner-21_DK#DNA/TcMar-Tc1	1619	3136	1851
Mariner-7_DBp#DNA/TcMar-Tc1	1567	2591	963
Mariner-5_DY#DNA/TcMar-Tc1	1649	2408	798
Mariner-30_DF#DNA/TcMar-Tc1	1666	2924	910
Mariner-1_DAn#DNA/TcMar-Tc1	1660	2333	2008
Mariner-1_DW#DNA/TcMar-Tc1	1642	2549	1358
Mariner-10_DBp#DNA/TcMar-Tc1	1658	2246	1055
Mariner-16_DF#DNA/TcMar-Tc1	1681	5371	2536
Mariner-12_DF#DNA/TcMar-Tc1	1662	2089	1588
Mariner-4_DK#DNA/TcMar-Tc1	1639	3000	1994
Mariner-7_DAn#DNA/TcMar-Tc1	1596	2340	4135
Mariner-14_DBp#DNA/TcMar-Mariner	1287	984	600
Mariner-6_DBi#DNA/TcMar-Tc1	1637	3739	4707
Mariner-21_DF#DNA/TcMar-Tc1	941	1128	910
Mariner-16_DK#DNA/TcMar-Tc1	1639	3411	1468
Mariner-26_DF#DNA/TcMar-Tc1	1659	3628	3168
Mariner-6_DF#DNA/TcMar-Mariner	1296	2680	2651
Mariner-1_DEl#DNA/TcMar-Mariner	1246	1455	2661
Mariner-17_DAn#DNA/TcMar-Tc1	1633	3417	5251
Mariner-14_DAn#DNA/TcMar-Tc1	1681	5486	2455
Mariner-5_DEl#DNA/TcMar-Tc1	1054	3273	5614
Mariner-19_DK#DNA/TcMar-Tc1	838	1666	532
Mariner-9_DEl#DNA/TcMar-Tc1	1637	2771	1440
Mariner-3_DAn#DNA/TcMar-Tc1	1642	4171	2175
Mariner-3_DEu#DNA/TcMar-Tc1	1664	2736	2124
Mariner-1_DEr#DNA/TcMar-Mariner	957	3179	22463
Mariner-8_DAn#DNA/TcMar-Tc1	1662	2088	2090
Mariner-2_DF#DNA/TcMar-Mariner	1325	3605	1683
Mariner-2_DVi#DNA/TcMar-Tc1	1617	1988	1367
Mariner-25_DF#DNA/TcMar-Tc1	1608	4225	3126
Mariner-17_DF#DNA/TcMar-Tc1	1661	3236	2659
Mariner-2_DT#DNA/TcMar-Tc1	1453	1826	2679
Mariner-7_DK#DNA/TcMar-Tc1	1624	4138	2290
Mariner-3_DBp#DNA/TcMar-Tc1	1620	2408	3511
PARISa_DSu#DNA/TcMar-Tc1	683	1966	1699
PARISa_DEl#DNA/TcMar-Tc1	1729	5837	2433
PARISa_DPe#DNA/TcMar-Tc1	1742	4232	1689
PARISa_DMo#DNA/TcMar-Tc1	1748	3110	943
PARISa_DBu#DNA/TcMar-Tc1	1731	2123	2747
PARISa_DAn#DNA/TcMar-Tc1	1722	4879	1717
PARISa_DK#DNA/TcMar-Tc1	1730	6075	19624
PARISa-1_DW#DNA/TcMar-Tc1	1488	1861	791
PARISa_DAm#DNA/TcMar-Tc1	437	3207	1266
PARISa_DPol#DNA/TcMar-Tc1	667	1331	1235
PARISa-5_DW#DNA/TcMar-Tc1	1478	81887	119383
PARISa_DEq#DNA/TcMar-Tc1	692	837	792
PARISa-2_DW#DNA/TcMar-Tc1	1695	84247	119943
PARISa_DPs#DNA/TcMar-Tc1	1727	5125	2081
Transib-1_DK#DNA/CMC-Transib	3268	7134	3231
Transib-7_DAn#DNA/CMC-Transib	3139	11953	3581
Transib-2_DEl#DNA/CMC-Transib	2686	4529	1477
Transib-3_DBi#DNA/CMC-Transib	2472	4724	3438
Transib-3_DK#DNA/CMC-Transib	1189	1784	1387
Transib-5_DK#DNA/CMC-Transib	1955	4904	2580
Transib-1_DF#DNA/CMC-Transib	3031	6063	2880
Transib-1_DBp#DNA/CMC-Transib	2103	4131	2244
Transib-11_DAn#DNA/CMC-Transib	1578	4082	2515
Transib-1_DEu#DNA/CMC-Transib	2331	2520	1332
Transib-2_DK#DNA/CMC-Transib	1884	4273	2150
Transib-2_DBi#DNA/CMC-Transib	6593	18051	9175
Transib-4_DAn#DNA/CMC-Transib	2786	5912	3150
Transib-2_DBp#DNA/CMC-Transib	1029	1526	842
Transib-6_DBp#DNA/CMC-Transib	3007	5369	2908
Transib-1_DAn#DNA/CMC-Transib	3015	5236	3648
Transib-8_DAn#DNA/CMC-Transib	2989	6391	3687
Transib-10_DAn#DNA/CMC-Transib	1340	2419	1439
Transib-2_DF#DNA/CMC-Transib	642	928	1372
Transib-3_DF#DNA/CMC-Transib	1029	1908	1269
Transib-5_DBp#DNA/CMC-Transib	2301	2941	2994
Transib-9_DAn#DNA/CMC-Transib	1305	2470	2062
Transib-5_DBi#DNA/CMC-Transib	2908	2972	2053
Transib-6_DK#DNA/CMC-Transib	1805	4902	2872
Transib-2_DW#DNA/CMC-Transib	2832	4337	2763
Transib-2_DAn#DNA/CMC-Transib	2921	7640	3453
Transib-6_DBi#DNA/CMC-Transib	2658	4452	3127
Transib-3_DBp#DNA/CMC-Transib	2806	4428	4271
Transib-1_DBi#DNA/CMC-Transib	2542	7612	3435
Transib-4_DK#DNA/CMC-Transib	1538	5745	1486
Transib-4_DBi#DNA/CMC-Transib	1464	3656	2197
Transib-6_DAn#DNA/CMC-Transib	2934	6584	12958
Transib-7_DBi#DNA/CMC-Transib	1296	2104	1318
Transib-4_DF#DNA/CMC-Transib	1522	3882	1561
Transib-3_DAn#DNA/CMC-Transib	2964	4898	5401
Transib-4_DBp#DNA/CMC-Transib	3046	3821	1752
Transib-5_DAn#DNA/CMC-Transib	2852	3107	2237
Transib-1_DEl#DNA/CMC-Transib	1484	3585	1523
Jockey-13_DAn#Non-LTR_retrotransposon/Jockey	5012	6451	3251
Jockey-5_DEu#Non-LTR_retrotransposon/Jockey	1877	2266	1140
Jockey-2_DPer#Non-LTR_retrotransposon/Jockey	7406	9782	6265
Jockey-11B_DBp#Non-LTR_retrotransposon/Jockey	4332	10143	3450
Jockey-8_DYa#Non-LTR_retrotransposon/Jockey	4556	9448	4454
Jockey-4_DYa#Non-LTR_retrotransposon/Jockey	2392	3016	1895
Jockey-5_DVi#Non-LTR_retrotransposon/Jockey	7882	13449	5682
Jockey-8_DF#Non-LTR_retrotransposon/Jockey	3459	3637	4143
Jockey-5_DF#Non-LTR_retrotransposon/Jockey	3230	3868	3858
Jockey-2_DEl#Non-LTR_retrotransposon/Jockey	4682	6171	13553
Jockey-2_DAn#Non-LTR_retrotransposon/Jockey	3144	3623	4326
Jockey-1_DAn#Non-LTR_retrotransposon/Jockey	4038	6974	3072
Jockey-2_DF#Non-LTR_retrotransposon/Jockey	4790	6817	7306
Jockey-8_DVi#Non-LTR_retrotransposon/Jockey	4574	5848	3864
Jockey-6_DBp#Non-LTR_retrotransposon/Jockey	3396	3870	3905
Jockey-9_DEu#Non-LTR_retrotransposon/Jockey	718	739	342
Jockey-N1_DVi#Non-LTR_retrotransposon/Jockey	5750	11621	5695
Jockey-11_DAn#Non-LTR_retrotransposon/Jockey	4634	5958	7518
Jockey-1_DF#Non-LTR_retrotransposon/Jockey	4653	6595	4246
Jockey-1_DT#Non-LTR_retrotransposon/Jockey	5123	8854	5079
Jockey-10_DF#Non-LTR_retrotransposon/Jockey	4469	5393	3256
Jockey-8_DPer#Non-LTR_retrotransposon/Jockey	3338	7536	5759
Jockey-12_DBp#Non-LTR_retrotransposon/Jockey	2310	2620	1309
Jockey-4_DF#Non-LTR_retrotransposon/Jockey	4749	8713	6567
Jockey-7_DEl#Non-LTR_retrotransposon/Jockey	6241	17706	19325
Jockey-4_DK#Non-LTR_retrotransposon/Jockey	4121	4591	3159
Jockey-2_DBi#Non-LTR_retrotransposon/Jockey	2500	3524	3301
Jockey-1_DBp#Non-LTR_retrotransposon/Jockey	3806	6771	6247
Jockey-6_DAn#Non-LTR_retrotransposon/Jockey	5033	9459	11892
Jockey-4_DSim#Non-LTR_retrotransposon/Jockey	3489	6697	2864
Jockey-4_DBp#Non-LTR_retrotransposon/Jockey	3878	5439	14418
Jockey-5_DYa#Non-LTR_retrotransposon/Jockey	2867	3535	1979
Jockey-3_DT#Non-LTR_retrotransposon/Jockey	4412	5939	14256
Jockey-6_DVi#Non-LTR_retrotransposon/Jockey	3957	8014	6548
Jockey-9_DF#Non-LTR_retrotransposon/Jockey	4536	9436	16467
Jockey-3_DEl#Non-LTR_retrotransposon/Jockey	4637	10912	19122
Jockey-10_DEu#Non-LTR_retrotransposon/Jockey	1244	1980	1242
Jockey-1_DK#Non-LTR_retrotransposon/Jockey	4935	7408	6721
Jockey-5_DBp#Non-LTR_retrotransposon/Jockey	4705	6581	6295
Jockey-11_DF#Non-LTR_retrotransposon/Jockey	3138	2756	1737
Jockey-6_DEu#Non-LTR_retrotransposon/Jockey	4791	4717	3414
Jockey-3_DAn#Non-LTR_retrotransposon/Jockey	7676	16132	19143
Jockey-15_DBp#Non-LTR_retrotransposon/Jockey	3396	8185	9901
Jockey-5_DK#Non-LTR_retrotransposon/Jockey	2397	5259	14847
Jockey-1_DWi#Non-LTR_retrotransposon/Jockey	4683	7581	4646
Jockey-12_DAn#Non-LTR_retrotransposon/Jockey	4790	12611	12430
Jockey-8_DEu#Non-LTR_retrotransposon/Jockey	3846	5648	3078
Jockey-1_DPer#Non-LTR_retrotransposon/Jockey	7061	12536	12006
Jockey-9_DPer#Non-LTR_retrotransposon/Jockey	4770	9445	7765
Jockey-5_DPer#Non-LTR_retrotransposon/Jockey	5081	12506	13373
Jockey-1_DBi#Non-LTR_retrotransposon/Jockey	2164	3063	1981
Jockey-2_DT#Non-LTR_retrotransposon/Jockey	4871	6832	5621
Jockey-4_DAn#Non-LTR_retrotransposon/Jockey	3698	5864	3150
Jockey-7_DAn#Non-LTR_retrotransposon/Jockey	4695	7534	25402
Jockey-1_DEl#Non-LTR_retrotransposon/Jockey	3901	4690	2466
Jockey-1_DGri#Non-LTR_retrotransposon/Jockey	5490	7565	8290
Jockey-1_Dro#Non-LTR_retrotransposon/Jockey	3906	5142	3916
Jockey-2_DK#Non-LTR_retrotransposon/Jockey	4667	5303	2629
Jockey-14_DAn#Non-LTR_retrotransposon/Jockey	3465	6467	2811
Jockey-12_DF#Non-LTR_retrotransposon/Jockey	674	1116	1882
Jockey-1_DVi#Non-LTR_retrotransposon/Jockey	5106	11883	15176
Jockey-7_DEu#Non-LTR_retrotransposon/Jockey	4138	8342	4082
Jockey-13_DBp#Non-LTR_retrotransposon/Jockey	3345	7888	4567
Jockey-7_DK#Non-LTR_retrotransposon/Jockey	1460	2228	1970
Jockey-2_DSim#Non-LTR_retrotransposon/Jockey	1060	1082	527
Jockey-3_DBp#Non-LTR_retrotransposon/Jockey	4204	7577	9131
Jockey-11_DBp#Non-LTR_retrotransposon/Jockey	3752	9437	20378
Jockey-4_DEl#Non-LTR_retrotransposon/Jockey	4933	5350	5667
Jockey-10_DBp#Non-LTR_retrotransposon/Jockey	3679	6800	3220
Jockey-6_DK#Non-LTR_retrotransposon/Jockey	3710	6162	11517
Jockey-3_DEu#Non-LTR_retrotransposon/Jockey	5079	7311	7734
Jockey-8_DAn#Non-LTR_retrotransposon/Jockey	4541	6918	4884
Jockey-4_DT#Non-LTR_retrotransposon/Jockey	3415	3100	2512
Jockey-6_DYa#Non-LTR_retrotransposon/Jockey	4561	4725	3974
Jockey-3_DGri#Non-LTR_retrotransposon/Jockey	4713	7811	6083
Jockey-3_DVi#Non-LTR_retrotransposon/Jockey	5343	17099	9534
Jockey-3_DYa#Non-LTR_retrotransposon/Jockey	5392	10065	4742
Jockey-1_DSe#Non-LTR_retrotransposon/Jockey	1872	1745	840
Jockey-2_DGri#Non-LTR_retrotransposon/Jockey	6032	12957	8568
Jockey-4_DPer#Non-LTR_retrotransposon/Jockey	4920	5331	4218
Jockey-7_DF#Non-LTR_retrotransposon/Jockey	4784	5198	6637
Jockey-1_DEr#Non-LTR_retrotransposon/Jockey	4709	5921	3725
Jockey-4B_DVi#Non-LTR_retrotransposon/Jockey	4864	8088	5274
Jockey-2_DVi#Non-LTR_retrotransposon/Jockey	6642	18274	22559
Jockey-14_DBp#Non-LTR_retrotransposon/Jockey	4642	8252	5236
Jockey-5_DAn#Non-LTR_retrotransposon/Jockey	4973	6860	6456
Jockey-4_DEu#Non-LTR_retrotransposon/Jockey	4227	8202	5275
Jockey-7_DPer#Non-LTR_retrotransposon/Jockey	3703	10119	4385
Jockey-9_DAn#Non-LTR_retrotransposon/Jockey	4704	7209	6341
Jockey-7_DVi#Non-LTR_retrotransposon/Jockey	2072	2131	1374
Jockey-1_DSi#Non-LTR_retrotransposon/Jockey	2671	6500	3098
Jockey-5_DEl#Non-LTR_retrotransposon/Jockey	3999	11122	5671
Jockey-6_DEl#Non-LTR_retrotransposon/Jockey	4722	14817	16915
Jockey-1_DEu#Non-LTR_retrotransposon/Jockey	4729	4692	2788
Jockey-10_DAn#Non-LTR_retrotransposon/Jockey	4359	20428	5603
Jockey-3_DF#Non-LTR_retrotransposon/Jockey	4560	7941	7986
Jockey-9_DBp#Non-LTR_retrotransposon/Jockey	976	3656	824
Jockey-3_DPer#Non-LTR_retrotransposon/Jockey	8276	12361	11695
Jockey-6_DPer#Non-LTR_retrotransposon/Jockey	7822	12094	13801
Jockey-2_DEu#Non-LTR_retrotransposon/Jockey	4697	7022	5636
Jockey-6_DF#Non-LTR_retrotransposon/Jockey	4958	6481	3465
Jockey-2_DBp#Non-LTR_retrotransposon/Jockey	3068	3645	3405
Jockey-4_DVi#Non-LTR_retrotransposon/Jockey	5310	9865	29000
Jockey-9_DY#Non-LTR_retrotransposon/Jockey	6316	13478	5973
Jockey-10_DY#Non-LTR_retrotransposon/Jockey	3596	6853	5229
Jockey-3_DK#Non-LTR_retrotransposon/Jockey	4849	6961	3743
Jockey-5_DTa#Non-LTR_retrotransposon/Jockey	4445	11371	6560
Jockey-7_DYa#Non-LTR_retrotransposon/Jockey	3348	25712	228662
RTE-1_DT#Non-LTR_retrotransposon/RTE-BovB	3220	4211	2027
RTE-1B_DAn#Non-LTR_retrotransposon/RTE-BovB	3251	8791	7511
RTE-1_DBi#Non-LTR_retrotransposon/RTE-BovB	2951	2141	1593
RTE-1C_DAn#Non-LTR_retrotransposon/RTE-BovB	3243	6475	2399
RTE-1_DBp#Non-LTR_retrotransposon/RTE-BovB	3232	4932	2930
RTE-2_DF#Non-LTR_retrotransposon/RTE-BovB	3249	4264	2132
RTE-1_DF#Non-LTR_retrotransposon/RTE-BovB	2624	2842	1358
RTE-2_DBp#Non-LTR_retrotransposon/RTE-BovB	3254	5598	2425
RTE-2_DAn#Non-LTR_retrotransposon/RTE-BovB	3251	5698	6687
RTEX-1_DT#Non-LTR_retrotransposon/RTE-X	4923	10225	10087
RTE-4_DF#Non-LTR_retrotransposon/RTE-BovB	3236	3602	2383
RTE-3_DF#Non-LTR_retrotransposon/RTE-BovB	3266	44016	12403
RTE-1_DAn#Non-LTR_retrotransposon/RTE-BovB	3361	5007	2786
RTEX-2_DT#Non-LTR_retrotransposon/RTE-X	4065	7690	9150
RTE-1BN1_DAn#Non-LTR_retrotransposon/RTE-BovB	643	2824	1217
CR1-8_DTa#Non-LTR_retrotransposon/CR1	4430	5792	3952
CR1-3_DK#Non-LTR_retrotransposon/CR1	4401	9890	11870
CR1-1_DEu#Non-LTR_retrotransposon/CR1	4497	8156	10319
CR1-2_DAn#Non-LTR_retrotransposon/CR1	4500	11485	12219
CR1-2_DF#Non-LTR_retrotransposon/CR1	3529	5160	6959
CR1-3_DBp#Non-LTR_retrotransposon/CR1	4339	6630	4011
CR1-2_DEl#Non-LTR_retrotransposon/CR1	3861	8972	9487
CR1-3_DPer#Non-LTR_retrotransposon/CR1	4396	6429	13171
CR1-4_DWi#Non-LTR_retrotransposon/CR1	4372	6283	4721
CR1-5_DK#Non-LTR_retrotransposon/CR1	2924	4677	4758
CR1-3_DBi#Non-LTR_retrotransposon/CR1	5439	10006	5405
CR1-4_DK#Non-LTR_retrotransposon/CR1	4558	8139	16278
CR1-1_DVi#Non-LTR_retrotransposon/CR1	4778	13455	11407
CR1-1_DBp#Non-LTR_retrotransposon/CR1	4456	15348	28253
CR1-2_DPer#Non-LTR_retrotransposon/CR1	3331	4072	7087
CR1-1_DPer#Non-LTR_retrotransposon/CR1	4691	14122	19070
CR1-2_DWi#Non-LTR_retrotransposon/CR1	4552	7450	4557
CR1-2_DT#Non-LTR_retrotransposon/CR1	4401	7294	15265
CR1-1_DF#Non-LTR_retrotransposon/CR1	3196	4776	2773
CR1-3_DEl#Non-LTR_retrotransposon/CR1	3440	48517	344125
CR1-4_DT#Non-LTR_retrotransposon/CR1	4443	7631	9001
CR1-2_DEu#Non-LTR_retrotransposon/CR1	4381	8915	3427
CR1-7_DT#Non-LTR_retrotransposon/CR1	4807	12480	6428
CR1-2_DBp#Non-LTR_retrotransposon/CR1	4356	7505	5128
CR1-5_DEl#Non-LTR_retrotransposon/CR1	1700	2224	1379
CR1-4_DAn#Non-LTR_retrotransposon/CR1	4268	10291	7225
CR1-6_DT#Non-LTR_retrotransposon/CR1	4027	49401	356712
CR1-1_DK#Non-LTR_retrotransposon/CR1	4554	55299	346733
CR1-3_DWi#Non-LTR_retrotransposon/CR1	4509	16715	23554
CR1-1_DEl#Non-LTR_retrotransposon/CR1	4690	6115	3931
CR1-3_DT#Non-LTR_retrotransposon/CR1	4561	6317	3114
CR1-1_DAn#Non-LTR_retrotransposon/CR1	4452	29221	253413
CR1-2_DBi#Non-LTR_retrotransposon/CR1	4504	7456	6580
CR1-5_DT#Non-LTR_retrotransposon/CR1	4514	7920	8296
CR1-9_DTa#Non-LTR_retrotransposon/CR1	4433	49799	365961
CR1-1_DBi#Non-LTR_retrotransposon/CR1	2937	5541	8184
CR1-4_DEl#Non-LTR_retrotransposon/CR1	4570	8273	4665
CR1-2_DK#Non-LTR_retrotransposon/CR1	4560	7624	3576
CR1-1_DT#Non-LTR_retrotransposon/CR1	4534	6115	8410
CR1-3_DAn#Non-LTR_retrotransposon/CR1	4449	7257	4555
CR1-10_DTa#Non-LTR_retrotransposon/CR1	4645	9322	6493
CR1-4_DBi#Non-LTR_retrotransposon/CR1	5071	11465	9117
Helitron-1_DBp#RC/Helitron	5055	7896	5357
Helitron-1_DEu#RC/Helitron	8136	31843	26078
Helitron-N1_DAn#RC/Helitron	853	4498	24021
Helitron-N2_DBp#RC/Helitron	1870	4428	24080
Helitron-1_DT#RC/Helitron	893	3436	1372
Helitron-2_DBp#RC/Helitron	3876	8552	7030
Helitron-1_DF#RC/Helitron	1333	4077	1277
Helitron-N2_DEl#RC/Helitron	594	838	305
Helitron-2_DF#RC/Helitron	2141	8889	5056
Helitron-N2_DBi#RC/Helitron	962	1310	1125
Helitron-2N_DW#RC/Helitron	827	1769	1938
Helitron-1_DK#RC/Helitron	5860	58288	23342
Helitron-1_DEl#RC/Helitron	1278	1203	664
Helitron-N1_DBp#RC/Helitron	1479	4308	17730
Helitron-1N_DF#RC/Helitron	1149	2864	4268
Helitron-N2_DT#RC/Helitron	938	2940	1708
Helitron-N1_DEl#RC/Helitron	630	1289	1966
Helitron-1_DPe#RC/Helitron	7229	11694	11728
Helitron-N3_DT#RC/Helitron	525	1419	1425
HelitronN-1_DPe#RC/Helitron	1155	1006	541
Helitron-N1_DBi#RC/Helitron	588	698	1580
R1-1_DEl#Non-LTR_retrotransposon/R1	4777	6239	5606
R1-5_DK#Non-LTR_retrotransposon/R1	4553	5290	4650
R1-2_DWi#Non-LTR_retrotransposon/R1	5398	5881	3752
R1-2_DPer#Non-LTR_retrotransposon/R1	4967	5838	7494
R1-4_DF#Non-LTR_retrotransposon/R1	3438	7264	2714
R1-7_DWi#Non-LTR_retrotransposon/R1	4677	11830	7788
R1-5_DYa#Non-LTR_retrotransposon/R1	4719	5420	5904
R1-3_DBp#Non-LTR_retrotransposon/R1	4731	7701	7592
R1-3_DEl#Non-LTR_retrotransposon/R1	4086	11388	11137
R1-1_DK#Non-LTR_retrotransposon/R1	4865	12706	5551
R1-10_DWi#Non-LTR_retrotransposon/R1	4784	10328	10333
R1-2_DYa#Non-LTR_retrotransposon/R1	3557	6162	14040
R1-3_DVi#Non-LTR_retrotransposon/R1	2494	2204	1263
R1-16_DWi#Non-LTR_retrotransposon/R1	3521	4447	8545
R1-15_DWi#Non-LTR_retrotransposon/R1	5743	8078	3648
R1-3_DAn#Non-LTR_retrotransposon/R1	4782	5477	10596
R1-1_DT#Non-LTR_retrotransposon/R1	4164	4194	4530
R1-5B_DK#Non-LTR_retrotransposon/R1	5687	11595	10899
R1-2_DK#Non-LTR_retrotransposon/R1	3679	3514	4205
R1-11_DWi#Non-LTR_retrotransposon/R1	4284	16567	20398
R1-4_DAn#Non-LTR_retrotransposon/R1	5089	5291	6559
R1-2_DAn#Non-LTR_retrotransposon/R1	5437	7099	5766
R1-1_DEu#Non-LTR_retrotransposon/R1	4963	9046	7211
R1-4_DYa#Non-LTR_retrotransposon/R1	5081	6822	4039
R1-2_DEl#Non-LTR_retrotransposon/R1	5188	7848	10032
R1-3_DF#Non-LTR_retrotransposon/R1	5108	8127	4722
R1-2B_DK#Non-LTR_retrotransposon/R1	4037	5044	9289
R1-3_DPer#Non-LTR_retrotransposon/R1	5126	12301	10844
R1-6_DK#Non-LTR_retrotransposon/R1	5665	11481	5659
R1-1_DBi#Non-LTR_retrotransposon/R1	4279	4765	4856
R1-5_DPer#Non-LTR_retrotransposon/R1	5195	27855	223102
R1-2_DBi#Non-LTR_retrotransposon/R1	4402	6230	8107
R1-6_DWi#Non-LTR_retrotransposon/R1	4944	11503	24430
R1-7_DK#Non-LTR_retrotransposon/R1	3350	5164	3244
R1-12_DWi#Non-LTR_retrotransposon/R1	5036	7857	4377
R1-1_DSi#Non-LTR_retrotransposon/R1	3570	5816	3308
R1-18_DWi#Non-LTR_retrotransposon/R1	1851	2253	2766
R1-2_DVi#Non-LTR_retrotransposon/R1	5599	7182	6303
R1-9_DWi#Non-LTR_retrotransposon/R1	5108	6683	4007
R1-1_DBp#Non-LTR_retrotransposon/R1	3599	4098	5740
R1-3_DK#Non-LTR_retrotransposon/R1	3968	5762	2611
R1-1C_DK#Non-LTR_retrotransposon/R1	3156	3017	3159
R1-4_DVi#Non-LTR_retrotransposon/R1	2429	13122	3816
R1-17_DWi#Non-LTR_retrotransposon/R1	3093	7772	4773
R1-2_DF#Non-LTR_retrotransposon/R1	3845	5287	3145
R1-4_DPer#Non-LTR_retrotransposon/R1	4226	11199	4610
R1-5_DWi#Non-LTR_retrotransposon/R1	3830	3923	3297
R1-2_DEu#Non-LTR_retrotransposon/R1	5211	15305	23334
R1-6_DPer#Non-LTR_retrotransposon/R1	5048	6626	5810
R1-1B_DVi#Non-LTR_retrotransposon/R1	3057	4634	15915
R1-1_DVi#Non-LTR_retrotransposon/R1	5178	278042	2041030
R1-13_DWi#Non-LTR_retrotransposon/R1	5097	5249	3854
R1-1_DPer#Non-LTR_retrotransposon/R1	5020	6912	5652
R1-4B_DK#Non-LTR_retrotransposon/R1	5335	7122	12098
R1-5_DF#Non-LTR_retrotransposon/R1	4355	5082	3738
R1-1_DEr#Non-LTR_retrotransposon/R1	5641	12146	5997
R1-4_DBp#Non-LTR_retrotransposon/R1	4992	5388	4987
R1-1B_DK#Non-LTR_retrotransposon/R1	4678	11566	7590
R1-2_DBp#Non-LTR_retrotransposon/R1	5614	8493	15202
R1-8_DWi#Non-LTR_retrotransposon/R1	5178	6942	4857
R1-3_DWi#Non-LTR_retrotransposon/R1	5074	6134	3368
R1-3B_DEl#Non-LTR_retrotransposon/R1	3386	5221	4572
R1-4_DK#Non-LTR_retrotransposon/R1	3915	104386	945597
R1-14_DWi#Non-LTR_retrotransposon/R1	4471	4889	12225
R1-3_DYa#Non-LTR_retrotransposon/R1	5479	10017	10571
R1-1_DAn#Non-LTR_retrotransposon/R1	5094	25174	16230
R1-2_DTa#Non-LTR_retrotransposon/R1	3959	19108	15715
R1-3_DEu#Non-LTR_retrotransposon/R1	2876	3334	2662
R1-7_DPer#Non-LTR_retrotransposon/R1	5139	14471	15760
R1-1_DF#Non-LTR_retrotransposon/R1	4830	5309	5198
R1-4_DWi#Non-LTR_retrotransposon/R1	5059	8426	6383
BEL-20_DTa-I#LTR/Pao	5690	13968	17672
BEL-7_DPe-LTR#LTR/Pao	227	229	170
BEL-17_DAn-LTR#LTR/Pao	266	502	133
BEL-6_DEl-LTR#LTR/Pao	275	588	411
BEL-20_DWil-I#LTR/Pao	5489	7032	6205
BEL-4_DBp-LTR#LTR/Pao	385	1197	468
BEL-21_DWil-LTR#LTR/Pao	364	419	224
BEL-13_DP-LTR#LTR/Pao	476	732	322
BEL-4_DBi-I#LTR/Pao	5882	11673	18032
BEL-11_DBp-I#LTR/Pao	5901	7855	6655
BEL-2_DFi-I#LTR/Pao	5656	7419	7324
BEL-1_DAn-LTR#LTR/Pao	194	170	91
BEL-6_DYa-LTR#LTR/Pao	385	966	371
BEL-22_DTa-LTR#LTR/Pao	371	409	2644
BEL-8_DMo-I#LTR/Pao	7246	9605	6732
BEL-12_DAn-I#LTR/Pao	2054	3476	3587
BEL-4_DBp-I#LTR/Pao	5335	10300	12134
BEL-2_DEl-LTR#LTR/Pao	297	977	1232
BEL-1_DFi-LTR#LTR/Pao	202	153	105
BEL-13_DWil-I#LTR/Pao	5296	8776	9572
BEL-7_DMoj-LTR#LTR/Pao	361	914	243
BEL-12_DAn-LTR#LTR/Pao	318	328	141
BEL-3_DMoj-I#LTR/Pao	7699	33586	246579
BEL-2_Deu-LTR#LTR/Pao	341	523	185
BEL-12_DEl-I#LTR/Pao	5446	10625	6123
BEL-2_DBi-LTR#LTR/Pao	227	314	171
BEL-16_DAn-I#LTR/Pao	7523	10133	8783
BEL-2_DVir-I#LTR/Pao	5468	9833	10529
BEL-4_DEl-I#LTR/Pao	5801	9803	24695
BEL-4_DYa-I#LTR/Pao	6566	13927	10038
BEL-1_DEre-LTR#LTR/Pao	297	188	109
BEL-7_DBp-LTR#LTR/Pao	298	554	834
BEL-2_DTa-LTR#LTR/Pao	398	774	417
BEL-7_DBp-I#LTR/Pao	5381	7521	8716
BEL-1_Deu-I#LTR/Pao	4182	7857	13909
BEL-6_DPe-I#LTR/Pao	5707	22177	32547
BEL-15_DP-LTR#LTR/Pao	288	338	1674
BEL-10_DAn-I#LTR/Pao	5349	16554	17550
BEL-6_DYa-I#LTR/Pao	5475	17903	21303
BEL-6_DAn-I#LTR/Pao	7483	20050	23530
BEL-19_DWil-LTR#LTR/Pao	208	203	99
BEL-1_DAn-I#LTR/Pao	5334	5663	7117
BEL-12_DBp-LTR#LTR/Pao	263	407	184
BEL-18_DEl-I#LTR/Pao	2941	15721	19163
BEL-4_DMoj-LTR#LTR/Pao	436	806	295
BEL-16_DEl-LTR#LTR/Pao	295	11671	17393
BEL-3_DPer-LTR#LTR/Pao	351	794	256
BEL-5_DYa-I#LTR/Pao	5651	7074	6199
BEL-2_DAn-LTR#LTR/Pao	228	235	159
BEL-4_DFi-I#LTR/Pao	2845	19574	27415
BEL-14_DTa-I#LTR/Pao	6552	9175	6556
BEL-13_DP-I#LTR/Pao	5493	20219	21791
BEL-2_DGri-LTR#LTR/Pao	490	716	239
BEL-19_DTa-I#LTR/Pao	2121	3536	2993
BEL-5_DMoj-I#LTR/Pao	6417	14666	6972
BEL-20_DWil-LTR#LTR/Pao	439	1322	262
BEL-9_DBp-I#LTR/Pao	4898	8474	11976
BEL-1_DKi-LTR#LTR/Pao	253	259	84
BEL-15_DP-I#LTR/Pao	6145	46212	82605
BEL-7_DAn-LTR#LTR/Pao	302	440	273
BEL-5_DVir-I#LTR/Pao	5780	17740	20594
BEL-7_DPer-LTR#LTR/Pao	130	59	24
BEL-7_DPer-I#LTR/Pao	5639	6403	4398
BEL-14_DAn-LTR#LTR/Pao	309	298	112
BEL-9_DAn-I#LTR/Pao	4060	6746	5047
BEL-18_DAn-I#LTR/Pao	2576	4975	4808
BEL-7_DEl-LTR#LTR/Pao	305	761	450
BEL-5_DPer-I#LTR/Pao	5615	7925	8843
BEL-21_DAn-LTR#LTR/Pao	308	328	327
BEL-4_DYa-LTR#LTR/Pao	114	103	71
BEL-4_DBi-LTR#LTR/Pao	350	369	207
BEL-2_DEl-I#LTR/Pao	6343	7566	8490
BEL-3_DYa-I#LTR/Pao	6271	10352	10424
BEL-12_DBp-I#LTR/Pao	6121	15900	21530
BEL-7_DMoj-I#LTR/Pao	6039	10549	6349
BEL-10_DEl-I#LTR/Pao	7574	12918	15883
BEL-3_DBp-LTR#LTR/Pao	386	834	217
BEL-1_DFi-I#LTR/Pao	5671	7698	5274
BEL-3_Deu-I#LTR/Pao	5642	11308	35749
BEL-6_DMoj-LTR#LTR/Pao	390	380	182
BEL-14_DAn-I#LTR/Pao	6322	13287	8468
BEL-20_DAn-I#LTR/Pao	5890	14325	22135
BEL-8_DMo-LTR#LTR/Pao	461	442	261
BEL-16_DEl-I#LTR/Pao	4741	9333	4473
BEL-3_Deu-LTR#LTR/Pao	277	1160	396
BEL-6_DPe-LTR#LTR/Pao	144	298	320
BEL-5_DYa-LTR#LTR/Pao	297	2647	702
BEL-5_DVir-LTR#LTR/Pao	272	457	307
BEL-2_DPer-LTR#LTR/Pao	564	476	284
BEL-2_DVir-LTR#LTR/Pao	358	684	594
BEL-1_DKi-I#LTR/Pao	5435	5438	5675
BEL-4_DEl-LTR#LTR/Pao	320	440	176
BEL-8_DEl-I#LTR/Pao	7930	45552	199205
BEL-7_DAn-I#LTR/Pao	4468	6587	3645
BEL-16_DAn-LTR#LTR/Pao	474	1284	952
BEL-3_DPer-I#LTR/Pao	5645	6543	10794
BEL-18_DTa-LTR#LTR/Pao	238	147	69
BEL-2_DPer-I#LTR/Pao	5368	9080	8958
BEL-9_DBp-LTR#LTR/Pao	245	352	279
BEL-2_DGri-I#LTR/Pao	7540	15987	8309
BEL-1_DTa-LTR#LTR/Pao	352	336	138
BEL-13_DEl-I#LTR/Pao	7716	10438	21420
BEL-4_DVir-LTR#LTR/Pao	116	55	29
BEL-18_DWil-LTR#LTR/Pao	279	268	164
BEL-5_DAn-LTR#LTR/Pao	1192	3528	2568
BEL-2_DBp-I#LTR/Pao	5376	8611	6061
BEL-15_DTa-LTR#LTR/Pao	510	1757	7520
BEL-21_DTa-LTR#LTR/Pao	387	3650	1238
BEL-17_DEl-LTR#LTR/Pao	155	135	47
BEL-11_DAn-LTR#LTR/Pao	322	595	339
BEL-3_DYa-LTR#LTR/Pao	331	942	371
BEL-3_DAn-I#LTR/Pao	4649	8243	8582
BEL-2_DBi-I#LTR/Pao	5416	9391	12319
BEL-22_DAn-I#LTR/Pao	3685	9373	4920
BEL-1_DBi-I#LTR/Pao	4670	5793	5404
BEL-1_DGri-LTR#LTR/Pao	277	274	228
BEL-11_DAn-I#LTR/Pao	2056	3938	4726
BEL-15_DEl-I#LTR/Pao	3950	4495	3060
BEL-9_DAn-LTR#LTR/Pao	224	504	1003
BEL-4_DMoj-I#LTR/Pao	7626	64603	21746
BEL-1_DEre-I#LTR/Pao	4261	8668	4621
BEL-20_DAn-LTR#LTR/Pao	300	578	364
BEL-18_DWil-I#LTR/Pao	5794	9370	22445
BEL-1_DBp-LTR#LTR/Pao	298	320	122
BEL-1_Deu-LTR#LTR/Pao	323	282	197
BEL-3_DBp-I#LTR/Pao	5954	12519	12270
BEL-5_DEl-I#LTR/Pao	5834	16727	8812
BEL-18_DAn-LTR#LTR/Pao	999	1524	419
BEL-5_DFi-LTR#LTR/Pao	332	174	64
BEL-8_DAn-LTR#LTR/Pao	284	465	172
BEL-15_DAn-I#LTR/Pao	5547	16116	12007
BEL-4_DEu-I#LTR/Pao	5957	13183	15962
BEL-4_DPse-I#LTR/Pao	6141	9723	7307
BEL-6_DPer-I#LTR/Pao	6160	26710	170974
BEL-5_DBp-I#LTR/Pao	8289	21079	14621
BEL-17_DTa-LTR#LTR/Pao	195	247	121
BEL-8_DBp-I#LTR/Pao	5444	6638	3706
BEL-5_DFi-I#LTR/Pao	3909	7703	3790
BEL-14_DP-LTR#LTR/Pao	473	630	343
BEL-5_DAn-I#LTR/Pao	4496	5659	7621
BEL-1_DVir-I#LTR/Pao	5912	7573	7732
BEL-6_DPer-LTR#LTR/Pao	364	655	374
BEL-2_DSe-LTR#LTR/Pao	344	738	1354
BEL-3_DEl-I#LTR/Pao	4950	6188	7577
BEL-18_DTa-I#LTR/Pao	5439	13408	12757
BEL-3_DAn-LTR#LTR/Pao	225	359	160
BEL-15_DTa-I#LTR/Pao	7605	25508	15300
BEL-3_DFi-LTR#LTR/Pao	344	704	1321
BEL-6_DMoj-I#LTR/Pao	5858	11945	23328
BEL-14_DEl-I#LTR/Pao	6059	153463	25932
BEL-1_DEl-LTR#LTR/Pao	295	360	201
BEL-8_DEl-LTR#LTR/Pao	454	909	505
BEL-14_DP-I#LTR/Pao	5617	12061	28921
BEL-17_DAn-I#LTR/Pao	5474	9830	23532
BEL-6_DAn-LTR#LTR/Pao	714	785	789
BEL-6_DBp-I#LTR/Pao	5611	10770	23401
BEL-8_DPe-LTR#LTR/Pao	316	274	122
BEL-3_DVir-I#LTR/Pao	4809	8496	5454
BEL-16_DTa-LTR#LTR/Pao	371	416	461
BEL-4_DEu-LTR#LTR/Pao	303	250	327
BEL-21_DTa-I#LTR/Pao	8171	40348	61112
BEL-2_DBp-LTR#LTR/Pao	212	318	95
BEL-14_DTa-LTR#LTR/Pao	272	923	202
BEL-5_DEu-LTR#LTR/Pao	336	216	111
BEL-5_DEu-I#LTR/Pao	5000	7089	9748
BEL-10_DBp-LTR#LTR/Pao	322	183	56
BEL-1_DGri-I#LTR/Pao	7281	16425	15642
BEL-3_DMoj-LTR#LTR/Pao	294	510	2034
BEL-1_DVir-LTR#LTR/Pao	352	386	199
BEL-2_Deu-I#LTR/Pao	5815	9925	22191
BEL-1_DBi-LTR#LTR/Pao	232	5621	2050
BEL-4_DVir-I#LTR/Pao	5752	7617	5161
BEL-17_DEl-I#LTR/Pao	4587	5516	2925
BEL-13_DAn-I#LTR/Pao	5514	8354	7203
BEL-2_DAn-I#LTR/Pao	5549	8244	15135
BEL-20_DTa-LTR#LTR/Pao	189	121	73
BEL-5_DBp-LTR#LTR/Pao	300	896	4807
BEL-3_DBi-LTR#LTR/Pao	312	1486	320
BEL-21_DWil-I#LTR/Pao	3490	11876	7292
BEL-17_DTa-I#LTR/Pao	6091	9531	9618
BEL-3_DEl-LTR#LTR/Pao	230	358	103
BEL-7_DPe-I#LTR/Pao	6378	27321	171980
BEL-8_DBp-LTR#LTR/Pao	378	531	401
BEL-19_DAn-I#LTR/Pao	5713	6846	9870
BEL-4_DAn-LTR#LTR/Pao	414	273	141
BEL-1_DTa-I#LTR/Pao	5674	11635	12429
BEL-4_DPse-LTR#LTR/Pao	300	258	396
BEL-22_DAn-LTR#LTR/Pao	270	258	303
BEL-2_DFi-LTR#LTR/Pao	386	395	267
BEL-22_DTa-I#LTR/Pao	8113	16186	32960
BEL-6_DEl-I#LTR/Pao	5856	24732	26506
BEL-15_DAn-LTR#LTR/Pao	303	368	140
BEL-10_DAn-LTR#LTR/Pao	384	322	464
BEL-13_DAn-LTR#LTR/Pao	286	451	336
BEL-3_DVir-LTR#LTR/Pao	487	833	428
BEL-13_DWil-LTR#LTR/Pao	256	338	115
BEL-3_DFi-I#LTR/Pao	3126	4221	4103
BEL-3_DBi-I#LTR/Pao	5046	7094	7917
BEL-19_DTa-LTR#LTR/Pao	444	388	173
BEL-11_DEl-I#LTR/Pao	6271	11565	5697
BEL-9_DEl-I#LTR/Pao	6278	9896	6589
BEL-1_DEl-I#LTR/Pao	5698	7169	9065
BEL-5_DMoj-LTR#LTR/Pao	398	606	236
BEL-2_DSe-I#LTR/Pao	5624	10023	56850
BEL-11_DBp-LTR#LTR/Pao	334	387	186
BEL-19_DAn-LTR#LTR/Pao	347	304	191
BEL-2_DTa-I#LTR/Pao	5429	11230	59958
BEL-4_DAn-I#LTR/Pao	7475	13362	20004
BEL-8_DPe-I#LTR/Pao	6104	30701	230868
BEL-4_DPer-I#LTR/Pao	6419	20915	9092
BEL-21_DAn-I#LTR/Pao	8522	16555	10888
BEL-5_DPer-LTR#LTR/Pao	371	1180	348
BEL-16_DTa-I#LTR/Pao	4922	17908	16398
BEL-19_DWil-I#LTR/Pao	5729	10694	13775
BEL-4_DPer-LTR#LTR/Pao	660	1703	685
BEL-10_DBp-I#LTR/Pao	3645	8950	18831
BEL-1_DBp-I#LTR/Pao	5695	7237	4477
BEL-8_DAn-I#LTR/Pao	9108	31836	37689
BEL-6_DBp-LTR#LTR/Pao	352	1069	909
BEL-4_DFi-LTR#LTR/Pao	315	227	70
Gypsy-32_DYa-I#LTR/Gypsy	5567	13873	17913
Gypsy-12_DAn-I#LTR/Gypsy	4175	5018	9400
Gypsy-4_DAn-LTR#LTR/Gypsy	1963	3625	2611
Gypsy-18_DTa-I#LTR/Gypsy	4820	12123	3075
Gypsy-18_DTa-LTR#LTR/Gypsy	1966	1908	1221
Gypsy-26_DPse-LTR#LTR/Gypsy	706	819	442
Gypsy-8_DEl-I#LTR/Gypsy	5209	5438	5359
Gypsy-9_DEl-LTR#LTR/Gypsy	304	277	270
Gypsy-52_DWil-LTR#LTR/Gypsy	733	2188	682
Gypsy-11_DBp-I#LTR/Gypsy	6058	12715	8918
Gypsy-12_DEl-I#LTR/Gypsy	4592	11389	5840
Gypsy-4_DKi-I#LTR/Gypsy	4187	11461	10667
Gypsy-11_DVir-I#LTR/Gypsy	6553	49065	17228
Gypsy-17_DEl-I#LTR/Gypsy	4288	6934	15731
Gypsy-50_DWil-I#LTR/Gypsy	6902	15843	9435
Gypsy-27_DBp-I#LTR/Gypsy	6528	9057	7398
Gypsy-8_DPer-LTR#LTR/Gypsy	2165	2636	2812
Gypsy-1_DKi-I#LTR/Gypsy	5175	11401	18126
Gypsy-37B_DWil-LTR#LTR/Gypsy	2315	5058	1979
Gypsy-5_DSe-I#LTR/Gypsy	6164	15033	11644
Gypsy-21_DAn-LTR#LTR/Gypsy	2492	11379	3936
Gypsy-20_DTa-I#LTR/Gypsy	5033	6980	5314
Gypsy-3_DSim-LTR#LTR/Gypsy	150	120	156
Gypsy-18_DEl-I#LTR/Gypsy	7168	14027	10260
Gypsy-2_DFi-LTR#LTR/Gypsy	296	432	188
Gypsy3_DV-I#LTR/Gypsy	16252	42260	46579
Gypsy-17_DBi-I#LTR/Gypsy	6827	27995	10857
Gypsy-56_DEl-LTR#LTR/Gypsy	594	433	225
Gypsy-15_DTa-I#LTR/Gypsy	5362	7582	5941
Gypsy-25_DP-LTR#LTR/Gypsy	1442	2165	2082
Gypsy-4_DBi-I#LTR/Gypsy	6045	11995	7293
Gypsy-2_DEl-I#LTR/Gypsy	5029	12880	16316
Gypsy-46_DEl-I#LTR/Gypsy	2995	4601	2924
Gypsy-6_DGri-LTR#LTR/Gypsy	257	948	488
Gypsy-27_DAn-LTR#LTR/Gypsy	1657	3072	885
Gypsy-13_DTa-I#LTR/Gypsy	4455	9103	6033
Gypsy-33_DEl-I#LTR/Gypsy	6935	14784	9928
Gypsy-23_DBp-I#LTR/Gypsy	5476	13741	8252
Gypsy-4_DSe-I#LTR/Gypsy	3480	4947	2449
Gypsy-15_DEl-I#LTR/Gypsy	6179	13432	23514
Gypsy-54_DWil-I#LTR/Gypsy	7456	11220	5762
Gypsy-14_DAn-LTR#LTR/Gypsy	504	785	501
Gypsy-5_DEl-LTR#LTR/Gypsy	937	905	1871
Gypsy-8_DEu-LTR#LTR/Gypsy	654	622	210
Gypsy-1_DG-I#LTR/Gypsy	8196	17838	17990
Gypsy-37_DEl-I#LTR/Gypsy	7408	11652	14099
Gypsy-32_DAn-LTR#LTR/Gypsy	1446	5035	3675
Gypsy-14_DBi-LTR#LTR/Gypsy	227	167	71
Gypsy-4_DBp-LTR#LTR/Gypsy	205	315	407
Gypsy-45_DWil-I#LTR/Gypsy	4692	9018	7525
Gypsy-14_DBp-I#LTR/Gypsy	4185	9598	29774
Gypsy-49_DEl-I#LTR/Gypsy	4235	8682	11697
Gypsy-11_DSim-I#LTR/Gypsy	6547	10701	5809
Gypsy-40_DAn-I#LTR/Gypsy	5587	24593	20574
Gypsy-54_DEl-I#LTR/Gypsy	4155	13500	15734
Gypsy-44_DEl-LTR#LTR/Gypsy	2587	6767	1791
Gypsy-16_DAn-I#LTR/Gypsy	5067	16026	9066
Gypsy-14_DEu-I#LTR/Gypsy	4797	6672	4729
Gypsy-29_DYa-LTR#LTR/Gypsy	238	224	183
Gypsy-26_DYa-I#LTR/Gypsy	7897	12091	14341
Gypsy-5_DVir-I#LTR/Gypsy	5948	14799	9352
Gypsy-8_DMoj-I#LTR/Gypsy	5887	27257	43454
Gypsy-10_DAn-I#LTR/Gypsy	4409	8073	8960
Gypsy-31_DYa-I#LTR/Gypsy	7568	12206	7902
Gypsy-13_DBi-I#LTR/Gypsy	4221	7441	5644
Gypsy-25_DPse-I#LTR/Gypsy	4618	16780	9852
Gypsy-5_DBp-I#LTR/Gypsy	4569	5513	4668
Gypsy-8_DSe-I#LTR/Gypsy	6481	11763	7055
Gypsy-8_DAn-I#LTR/Gypsy	5575	12713	10455
Gypsy-11_DEu-I#LTR/Gypsy	4549	6268	11842
Gypsy-6_DBi-LTR#LTR/Gypsy	195	139	81
Gypsy-9_DEu-LTR#LTR/Gypsy	206	161	93
Gypsy-9_DAn-I#LTR/Gypsy	5739	13323	24304
Gypsy-57_DWil-LTR#LTR/Gypsy	352	294	116
Gypsy-31_DAn-I#LTR/Gypsy	5350	6805	4954
Gypsy-24_DEl-I#LTR/Gypsy	6148	13965	6200
Gypsy-48_DWil-LTR#LTR/Gypsy	216	230	64
Gypsy-29_DAn-I#LTR/Gypsy	6337	12658	7634
Gypsy-5_DPer-I#LTR/Gypsy	5234	14876	8621
Gypsy-32_DYa-LTR#LTR/Gypsy	2376	3867	2200
Gypsy-1_DSim-LTR#LTR/Gypsy	522	1564	672
Gypsy-3_DAn-LTR#LTR/Gypsy	2051	2876	4580
Gypsy-16_DBi-I#LTR/Gypsy	4234	4734	4289
Gypsy-19_DEl-LTR#LTR/Gypsy	507	59821	446647
Gypsy-3_DBi-I#LTR/Gypsy	4817	6918	4573
Gypsy-25_DAn-I#LTR/Gypsy	7128	13977	8357
Gypsy-59_DWil-I#LTR/Gypsy	5855	12920	7322
Gypsy-13_DVir-I#LTR/Gypsy	4628	4934	5129
Gypsy-10_DEl-I#LTR/Gypsy	4799	6085	8141
Gypsy-1_DTa-LTR#LTR/Gypsy	324	631	302
Gypsy-3_DAn-I#LTR/Gypsy	5196	8332	11395
Gypsy-12_DFi-LTR#LTR/Gypsy	173	139	60
Gypsy-27_DEl-LTR#LTR/Gypsy	2026	4470	14207
Gypsy-1_Deu-I#LTR/Gypsy	6168	15161	8091
Gypsy-51_DEl-I#LTR/Gypsy	6684	13973	32538
Gypsy-7_DSim-LTR#LTR/Gypsy	398	1565	2447
Gypsy-1_DAn-LTR#LTR/Gypsy	349	268	131
Gypsy-6_DAn-I#LTR/Gypsy	4778	7907	4715
Gypsy-22_DY-LTR#LTR/Gypsy	1831	3685	1115
Gypsy-11_DBi-I#LTR/Gypsy	4548	8343	3478
Gypsy-34_DAn-LTR#LTR/Gypsy	204	2461	16772
Gypsy-2_DSe-I#LTR/Gypsy	6411	11371	8527
Gypsy-1_DBi-LTR#LTR/Gypsy	503	376	237
Gypsy-6_DEu-I#LTR/Gypsy	6954	11851	13298
Gypsy-3_DGri-LTR#LTR/Gypsy	300	417	210
Gypsy-10_DMoj-I#LTR/Gypsy	4162	6759	12841
Gypsy-7_DSe-I#LTR/Gypsy	4377	9517	7049
Gypsy-10_DBp-I#LTR/Gypsy	6157	17477	14756
Gypsy-3_DEl-I#LTR/Gypsy	6311	8743	12473
Gypsy-29_DYa-I#LTR/Gypsy	4674	5901	5429
Gypsy-5_DFi-LTR#LTR/Gypsy	217	310	211
Gypsy-61_DWil-I#LTR/Gypsy	5044	7013	8693
Gypsy-9_DBp-I#LTR/Gypsy	6023	11355	7071
Gypsy-44_DEl-I#LTR/Gypsy	4520	11671	6195
Gypsy-32_DP-I#LTR/Gypsy	5705	9766	19778
Gypsy-3_DKi-LTR#LTR/Gypsy	926	1989	12768
Gypsy-21_DBp-I#LTR/Gypsy	5920	8600	12964
Gypsy-9_DEl-I#LTR/Gypsy	4489	6530	4565
Gypsy-3_Deu-I#LTR/Gypsy	4318	4489	3330
Gypsy-18_DAn-I#LTR/Gypsy	4520	5560	9894
Gypsy-8_DFi-I#LTR/Gypsy	5217	11479	9665
Gypsy-12_DTa-LTR#LTR/Gypsy	277	549	176
Gypsy-12_DAn-LTR#LTR/Gypsy	255	1088	1881
Gypsy-12_DEl-LTR#LTR/Gypsy	263	840	557
Gypsy-28_DYa-I#LTR/Gypsy	7997	12553	8142
Gypsy-11_DTa-LTR#LTR/Gypsy	491	1105	239
Gypsy-24_DAn-LTR#LTR/Gypsy	331	608	303
Gypsy-3_DFi-I#LTR/Gypsy	4203	13359	52937
Gypsy-31_DEl-I#LTR/Gypsy	6826	16821	12892
Gypsy-3_DBp-I#LTR/Gypsy	4985	8112	10065
Gypsy-3_DVir-LTR#LTR/Gypsy	361	882	1515
Gypsy-21_DEl-I#LTR/Gypsy	4787	5400	3565
Gypsy-43_DWil-I#LTR/Gypsy	3904	29925	242068
Gypsy-14B_DWil-LTR#LTR/Gypsy	828	924	546
Gypsy-62_DWil-LTR#LTR/Gypsy	441	460	139
Gypsy-6_DSim-LTR#LTR/Gypsy	185	271	228
Gypsy-45_DWil-LTR#LTR/Gypsy	131	860	1145
Gypsy-5_DKi-LTR#LTR/Gypsy	312	796	312
Gypsy-15_DTa-LTR#LTR/Gypsy	676	1402	1175
Gypsy-5_DEl-I#LTR/Gypsy	6364	9253	21213
Gypsy-4_DAn-I#LTR/Gypsy	5629	9088	8223
Gypsy-2_DTa-LTR#LTR/Gypsy	161	275	284
Gypsy-11_DPer-I#LTR/Gypsy	8270	13285	12015
Gypsy-4_DBi-LTR#LTR/Gypsy	441	1017	423
Gypsy-17_DBi-LTR#LTR/Gypsy	585	1293	564
Gypsy-1_DBp-I#LTR/Gypsy	4611	9248	9411
Gypsy-7_DBp-I#LTR/Gypsy	6601	14925	8410
Gypsy-45_DEl-LTR#LTR/Gypsy	186	130	23
Gypsy-7_DEl-LTR#LTR/Gypsy	326	448	105
Gypsy-2_DAn-I#LTR/Gypsy	8601	69607	143808
Gypsy-51_DWil-LTR#LTR/Gypsy	333	5722	1343
Gypsy-56_DWil-LTR#LTR/Gypsy	357	1207	912
Gypsy-10_DVir-I#LTR/Gypsy	5579	7141	4750
Gypsy-1_DPer-LTR#LTR/Gypsy	817	2151	507
Gypsy-5_DPer-LTR#LTR/Gypsy	199	696	123
Gypsy-11_DAn-LTR#LTR/Gypsy	303	1158	1651
Gypsy-9_DSim-LTR#LTR/Gypsy	362	376	298
Gypsy-11_DEl-LTR#LTR/Gypsy	393	421	655
Gypsy-9_DFi-LTR#LTR/Gypsy	291	383	127
Gypsy-10_DEu-LTR#LTR/Gypsy	188	228	113
Gypsy-15_DEl-LTR#LTR/Gypsy	444	256	144
Gypsy-11_DSim-LTR#LTR/Gypsy	340	325	163
Gypsy-13_DBp-LTR#LTR/Gypsy	495	920	549
Gypsy-64_DWil-LTR#LTR/Gypsy	292	353	201
Gypsy-53_DEl-I#LTR/Gypsy	4389	6531	4704
Gypsy-30_DYa-I#LTR/Gypsy	6629	18190	9672
Gypsy-7_DFi-LTR#LTR/Gypsy	297	191	97
Gypsy-9_DMoj-LTR#LTR/Gypsy	423	939	7246
Gypsy-2_DBp-I#LTR/Gypsy	6274	9484	4568
Gypsy-13_DEu-LTR#LTR/Gypsy	923	764	442
Gypsy-24_DY-LTR#LTR/Gypsy	116	56	49
Gypsy-14_DAn-I#LTR/Gypsy	6105	54415	64467
Gypsy-13_DBp-I#LTR/Gypsy	3661	6171	4739
Gypsy-16_DTa-LTR#LTR/Gypsy	168	242	157
Gypsy-53_DWil-I#LTR/Gypsy	4892	10323	5507
Gypsy-26_DP-I#LTR/Gypsy	5621	14030	7526
Gypsy-1_DAn-I#LTR/Gypsy	4530	8726	6894
Gypsy-28_DAn-I#LTR/Gypsy	5696	15612	5774
Gypsy-15_DAn-LTR#LTR/Gypsy	537	974	2258
Gypsy-6_DGri-I#LTR/Gypsy	7739	20670	36306
Gypsy-1_DG-LTR#LTR/Gypsy	610	389	289
Gypsy-29_DEl-I#LTR/Gypsy	3913	6989	4041
Gypsy-5_DSim-I#LTR/Gypsy	7162	11552	11263
Gypsy-32_DEl-I#LTR/Gypsy	5495	11197	50308
Gypsy-22_DEl-LTR#LTR/Gypsy	654	1568	2461
Gypsy-40_DEl-I#LTR/Gypsy	2052	5102	2047
Gypsy-39_DAn-LTR#LTR/Gypsy	707	648	490
Gypsy-2_DSim-I#LTR/Gypsy	3690	6792	3133
Gypsy-3_DBi-LTR#LTR/Gypsy	292	293	97
Gypsy-12_DSim-LTR#LTR/Gypsy	331	736	352
Gypsy-13_DFi-I#LTR/Gypsy	5334	9136	6327
Gypsy-5_DVir-LTR#LTR/Gypsy	404	348	187
Gypsy-5_Deu-I#LTR/Gypsy	4000	9175	15830
Gypsy-1_DTa-I#LTR/Gypsy	4775	8142	6505
Gypsy-15_DAn-I#LTR/Gypsy	5906	18009	23527
Gypsy-10_DVir-LTR#LTR/Gypsy	2038	67292	611566
Gypsy-25_DEl-I#LTR/Gypsy	8423	19959	9105
Gypsy-43_DWil-LTR#LTR/Gypsy	685	581	3049
Gypsy-7_DSim-I#LTR/Gypsy	6826	10610	6585
Gypsy-5_DBp-LTR#LTR/Gypsy	204	145	86
Gypsy-13_DVir-LTR#LTR/Gypsy	239	271	145
Gypsy-10_DTa-I#LTR/Gypsy	7432	35624	198456
Gypsy-6_DSe-LTR#LTR/Gypsy	172	244	327
Gypsy-1_DFi-I#LTR/Gypsy	8634	17230	15996
Gypsy-12_DEu-LTR#LTR/Gypsy	314	240	90
Gypsy-17_DEl-LTR#LTR/Gypsy	202	2952	781
Gypsy-3_DSe-LTR#LTR/Gypsy	379	520	80
Gypsy-4_DSim-LTR#LTR/Gypsy	339	186	66
Gypsy-5_Deu-LTR#LTR/Gypsy	328	311	223
Gypsy-48_DWil-I#LTR/Gypsy	7788	14592	13088
Gypsy-29_DAn-LTR#LTR/Gypsy	506	1155	510
Gypsy-8_DEu-I#LTR/Gypsy	5687	9724	7686
Gypsy-12_DPer-LTR#LTR/Gypsy	786	2114	489
Gypsy-25_DAn-LTR#LTR/Gypsy	394	734	538
Gypsy-46_DWil-I#LTR/Gypsy	4680	5908	2704
Gypsy-43_DEl-I#LTR/Gypsy	4654	7546	4033
Gypsy-15_DBp-I#LTR/Gypsy	5085	7478	4809
Gypsy-6_DFi-I#LTR/Gypsy	4646	9392	4910
Gypsy-9_DPer-I#LTR/Gypsy	4896	8683	4816
Gypsy-54_DWil-LTR#LTR/Gypsy	157	447	207
Gypsy-27_DYa-LTR#LTR/Gypsy	154	175	81
Gypsy-15_DBi-I#LTR/Gypsy	5907	12425	4836
Gypsy-3_Deu-LTR#LTR/Gypsy	1090	1418	581
Gypsy-36_DAn-LTR#LTR/Gypsy	347	519	1032
Gypsy-19_DAn-LTR#LTR/Gypsy	2242	5821	2802
Gypsy-9_DBp-LTR#LTR/Gypsy	438	453	122
Gypsy-31_DAn-LTR#LTR/Gypsy	2052	2149	1968
Gypsy-13_DSim-I#LTR/Gypsy	5444	9721	5810
Gypsy-25_DPse-LTR#LTR/Gypsy	3362	5206	5134
Gypsy-9_DEu-I#LTR/Gypsy	4560	6394	4677
Gypsy-3_DFi-LTR#LTR/Gypsy	207	240	124
Gypsy-19_DBp-LTR#LTR/Gypsy	262	507	159
Gypsy-11_DVir-LTR#LTR/Gypsy	1611	3911	1580
Gypsy-42_DAn-LTR#LTR/Gypsy	204	177	101
Gypsy-22_DBp-LTR#LTR/Gypsy	300	268	87
Gypsy-39_DAn-I#LTR/Gypsy	5632	7094	5627
Gypsy-1_DVir-I#LTR/Gypsy	6627	11415	5775
Gypsy-10_DMoj-LTR#LTR/Gypsy	3026	3355	3151
Gypsy-4_DGri-I#LTR/Gypsy	5818	8331	6427
Gypsy-17_DAn-LTR#LTR/Gypsy	1923	4421	2381
Gypsy-34_DAn-I#LTR/Gypsy	4532	5293	4419
Gypsy-38_DEl-I#LTR/Gypsy	4820	8151	14652
Gypsy-3_DEl-LTR#LTR/Gypsy	375	285	149
Gypsy-30_DEl-LTR#LTR/Gypsy	1248	1205	929
Gypsy-17_DBp-I#LTR/Gypsy	3165	12024	8332
Gypsy-20_DEl-I#LTR/Gypsy	6752	71187	472563
Gypsy-61_DWil-LTR#LTR/Gypsy	951	1841	686
Gypsy-16_DBp-I#LTR/Gypsy	7320	12107	13115
Gypsy-22_DY-I#LTR/Gypsy	6410	10276	10344
Gypsy-6_DPer-LTR#LTR/Gypsy	1868	1891	1775
Gypsy-13_DEl-I#LTR/Gypsy	3899	5289	4353
Gypsy-9_DAn-LTR#LTR/Gypsy	2092	3372	3241
Gypsy-27_DP-LTR#LTR/Gypsy	219	5310	1495
Gypsy-44_DWil-I#LTR/Gypsy	5882	9360	6454
Gypsy-1_DBp-LTR#LTR/Gypsy	217	480	153
Gypsy-23_DEl-I#LTR/Gypsy	7971	16389	15952
Gypsy-57_DWil-I#LTR/Gypsy	5721	13745	9496
Gypsy-5_DBi-I#LTR/Gypsy	4815	9895	6573
Gypsy-42_DEl-I#LTR/Gypsy	6812	15900	9656
Gypsy-1_DSe-LTR#LTR/Gypsy	358	1448	702
Gypsy-3_DBp-LTR#LTR/Gypsy	266	318	200
Gypsy-4_DVir-I#LTR/Gypsy	4839	8436	6804
Gypsy-13_DFi-LTR#LTR/Gypsy	187	338	233
Gypsy-17_DAn-I#LTR/Gypsy	5556	6678	5105
Gypsy-7_DEu-LTR#LTR/Gypsy	654	2646	1087
Gypsy-31_DP-I#LTR/Gypsy	3633	4982	5915
Gypsy-9_DFi-I#LTR/Gypsy	4647	7951	20779
Gypsy-55_DEl-I#LTR/Gypsy	5742	8478	5813
Gypsy-22_DEl-I#LTR/Gypsy	3331	6741	5306
Gypsy-14_DEu-LTR#LTR/Gypsy	239	483	321
Gypsy-16_DEl-I#LTR/Gypsy	5945	10517	11376
Gypsy-41_DAn-I#LTR/Gypsy	5972	11606	23583
Gypsy-28_DYa-LTR#LTR/Gypsy	367	1253	691
Gypsy-63_DWil-I#LTR/Gypsy	7004	28843	7901
Gypsy-42_DAn-I#LTR/Gypsy	4041	7355	4236
Gypsy-24_DY-I#LTR/Gypsy	7539	13391	17698
Gypsy-5_DAn-LTR#LTR/Gypsy	481	48645	486054
Gypsy-9_DMoj-I#LTR/Gypsy	8371	18499	20052
Gypsy-26_DP-LTR#LTR/Gypsy	2159	3000	4056
Gypsy-8_DEl-LTR#LTR/Gypsy	328	489	314
Gypsy-11_DFi-I#LTR/Gypsy	4591	5859	6124
Gypsy-17_DTa-I#LTR/Gypsy	4038	4538	5081
Gypsy-13_DEu-I#LTR/Gypsy	6568	10757	30690
Gypsy-1_DPer-I#LTR/Gypsy	7519	11277	8183
Gypsy-53_DWil-LTR#LTR/Gypsy	202	494	502
Gypsy-12_DEu-I#LTR/Gypsy	6207	12056	10884
Gypsy-2_DAn-LTR#LTR/Gypsy	562	2037	1128
Gypsy-12_DBp-LTR#LTR/Gypsy	219	217	128
Gypsy-7_DAn-LTR#LTR/Gypsy	193	620	230
Gypsy-51_DWil-I#LTR/Gypsy	4759	10307	7692
Gypsy-12_DPer-I#LTR/Gypsy	6129	6457	12180
Gypsy-32_DAn-I#LTR/Gypsy	5660	15798	9837
Gypsy-2_DSim-LTR#LTR/Gypsy	1163	5289	4542
Gypsy-1_Deu-LTR#LTR/Gypsy	492	4558	797
Gypsy-5_DSim-LTR#LTR/Gypsy	369	3720	28475
Gypsy-28_DEl-I#LTR/Gypsy	3409	3705	1950
Gypsy-7_DBp-LTR#LTR/Gypsy	661	842	315
Gypsy-1_DFi-LTR#LTR/Gypsy	614	545	396
Gypsy-59_DWil-LTR#LTR/Gypsy	286	287	149
Gypsy-45_DEl-I#LTR/Gypsy	3976	11956	4998
Gypsy-30_DEl-I#LTR/Gypsy	2252	2696	2736
Gypsy-30_DYa-LTR#LTR/Gypsy	1266	2780	955
Gypsy-4_Deu-I#LTR/Gypsy	6183	19519	13152
Gypsy-6_DSim-I#LTR/Gypsy	7082	22278	9860
Gypsy-22_DAn-LTR#LTR/Gypsy	308	926	242
Gypsy-11_DEl-I#LTR/Gypsy	4397	7226	4806
Gypsy-19_DEl-I#LTR/Gypsy	4740	9508	8884
Gypsy-13_DBi-LTR#LTR/Gypsy	320	669	1309
Gypsy-33_DAn-LTR#LTR/Gypsy	1877	3448	1682
Gypsy-25_DBp-I#LTR/Gypsy	3149	7028	2840
Gypsy-14B_DWil-I#LTR/Gypsy	5179	8299	9893
Gypsy-60_DWil-I#LTR/Gypsy	8556	14921	13733
Gypsy-42_DWil-LTR#LTR/Gypsy	327	1326	326
Gypsy-8_DBi-LTR#LTR/Gypsy	322	3591	1448
Gypsy-15_DFi-LTR#LTR/Gypsy	1270	2258	3523
Gypsy-20_DBp-I#LTR/Gypsy	7132	10703	12244
Gypsy-57_DEl-LTR#LTR/Gypsy	189	184	84
Gypsy-11_DAn-I#LTR/Gypsy	4171	6300	14991
Gypsy-13_DAn-LTR#LTR/Gypsy	402	511	279
Gypsy-10_DFi-LTR#LTR/Gypsy	296	1551	2059
Gypsy-2_DBp-LTR#LTR/Gypsy	513	709	893
Gypsy-7_DBi-I#LTR/Gypsy	6787	15380	19331
Gypsy-5_DKi-I#LTR/Gypsy	4940	10003	5929
Gypsy-12_DFi-I#LTR/Gypsy	4118	5380	6022
Gypsy-31_DYa-LTR#LTR/Gypsy	122	362	358
Gypsy-37_DAn-I#LTR/Gypsy	5949	15678	12603
Gypsy-6_DSe-I#LTR/Gypsy	4320	13829	5444
Gypsy-11_DFi-LTR#LTR/Gypsy	251	353	96
Gypsy-19_DAn-I#LTR/Gypsy	5612	35788	40154
Gypsy-35_DAn-LTR#LTR/Gypsy	2116	4244	1924
Gypsy-3_DSe-I#LTR/Gypsy	7373	12679	12908
Gypsy-10_DPer-LTR#LTR/Gypsy	1031	891	309
Gypsy-2_DGri-I#LTR/Gypsy	6776	22224	15304
Gypsy-8_DBp-I#LTR/Gypsy	6187	7659	6110
Gypsy-32_DP-LTR#LTR/Gypsy	1556	3169	2077
Gypsy-36_DAn-I#LTR/Gypsy	4561	8705	5109
Gypsy-14_DBp-LTR#LTR/Gypsy	211	260	191
Gypsy-6_DVir-I#LTR/Gypsy	4438	6867	3633
Gypsy-8_DMoj-LTR#LTR/Gypsy	511	705	334
Gypsy-27_DYa-I#LTR/Gypsy	4758	16681	24151
Gypsy-7_DEl-I#LTR/Gypsy	4622	5816	4474
Gypsy-55_DWil-I#LTR/Gypsy	3934	7694	9459
Gypsy-15_DBi-LTR#LTR/Gypsy	539	942	470
Gypsy-13_DEl-LTR#LTR/Gypsy	441	492	483
Gypsy-38_DAn-LTR#LTR/Gypsy	344	304	89
Gypsy-13_DSim-LTR#LTR/Gypsy	771	45610	446740
Gypsy-13_DTa-LTR#LTR/Gypsy	367	435	210
Gypsy-26_DBp-I#LTR/Gypsy	4563	6403	5643
Gypsy-23_DAn-I#LTR/Gypsy	5071	6604	5747
Gypsy-7_DPer-I#LTR/Gypsy	8813	15992	25669
Gypsy-23_DAn-LTR#LTR/Gypsy	1767	1563	2816
Gypsy-10_DTa-LTR#LTR/Gypsy	439	391	165
Gypsy-4_DFi-I#LTR/Gypsy	5317	7918	10462
Gypsy-48_DEl-I#LTR/Gypsy	3162	5841	8362
Gypsy-47_DWil-LTR#LTR/Gypsy	510	768	622
Gypsy-21_DAn-I#LTR/Gypsy	5494	16115	9250
Gypsy-8_DPer-I#LTR/Gypsy	5638	17946	16813
Gypsy-1_DVir-LTR#LTR/Gypsy	424	332	141
Gypsy-6_DBp-I#LTR/Gypsy	4563	10013	8072
Gypsy-2_DFi-I#LTR/Gypsy	3343	3597	4120
Gypsy-21_DY-LTR#LTR/Gypsy	642	2177	1251
Gypsy-9_DPer-LTR#LTR/Gypsy	1126	2530	4946
Gypsy-6_DPer-I#LTR/Gypsy	5904	12623	6409
Gypsy-17_DBp-LTR#LTR/Gypsy	1842	2530	1707
Gypsy-28_DAn-LTR#LTR/Gypsy	1823	5061	5186
Gypsy-26_DPse-I#LTR/Gypsy	6105	17083	8073
Gypsy-30_DAn-I#LTR/Gypsy	6326	11471	9551
Gypsy-49_DWil-LTR#LTR/Gypsy	188	210	335
Gypsy-26_DAn-I#LTR/Gypsy	4732	11900	5680
Gypsy-4_DEl-LTR#LTR/Gypsy	269	338	128
Gypsy-19_DTa-I#LTR/Gypsy	4199	14737	7409
Gypsy-19_DBp-I#LTR/Gypsy	4743	8221	6760
Gypsy-2_DBi-I#LTR/Gypsy	4241	5969	5056
Gypsy-26_DEl-I#LTR/Gypsy	2807	6897	2726
Gypsy-1_DEl-LTR#LTR/Gypsy	187	174	116
Gypsy-2_Deu-I#LTR/Gypsy	3605	17362	31648
Gypsy-20_DAn-LTR#LTR/Gypsy	1559	4601	2216
Gypsy-9_DSim-I#LTR/Gypsy	3241	7652	6088
Gypsy-2_DKi-LTR#LTR/Gypsy	135	51	25
Gypsy-22_DBp-I#LTR/Gypsy	4715	6176	2635
Gypsy-58_DWil-I#LTR/Gypsy	5287	9485	18298
Gypsy-42_DWil-I#LTR/Gypsy	5437	13106	5944
Gypsy-12_DVir-I#LTR/Gypsy	5056	14812	10988
Gypsy-47_DEl-I#LTR/Gypsy	7747	12105	11136
Gypsy-60_DWil-LTR#LTR/Gypsy	353	303	124
Gypsy-4_Deu-LTR#LTR/Gypsy	469	832	305
Gypsy-54_DEl-LTR#LTR/Gypsy	233	2507	289
Gypsy-28_DBp-I#LTR/Gypsy	6114	11087	14991
Gypsy-41_DAn-LTR#LTR/Gypsy	2049	4226	1498
Gypsy-10_DSim-I#LTR/Gypsy	5188	12380	5196
Gypsy-40_DAn-LTR#LTR/Gypsy	418	947	383
Gypsy-23_DY-LTR#LTR/Gypsy	1499	2364	1167
Gypsy-38_DAn-I#LTR/Gypsy	4540	9789	16500
Gypsy-10_DAn-LTR#LTR/Gypsy	245	534	114
Gypsy-6_DFi-LTR#LTR/Gypsy	235	232	63
Gypsy-22_DAn-I#LTR/Gypsy	4403	9330	8096
Gypsy-18_DEl-LTR#LTR/Gypsy	476	651	301
Gypsy-4_DBp-I#LTR/Gypsy	4530	5141	4576
Gypsy-44_DWil-LTR#LTR/Gypsy	450	771	189
Gypsy-2_DEl-LTR#LTR/Gypsy	349	576	206
Gypsy-15_DBp-LTR#LTR/Gypsy	2170	3722	2062
Gypsy-4_DKi-LTR#LTR/Gypsy	295	400	367
Gypsy-12_DBp-I#LTR/Gypsy	3951	8898	46428
Gypsy-17_DTa-LTR#LTR/Gypsy	414	387	164
Gypsy-10_DFi-I#LTR/Gypsy	4399	5411	3184
Gypsy-27_DP-I#LTR/Gypsy	4725	11033	16923
Gypsy-35_DEl-I#LTR/Gypsy	7323	12617	8669
Gypsy-36_DEl-I#LTR/Gypsy	2498	13259	18315
Gypsy-3_DSim-I#LTR/Gypsy	4902	22336	7498
Gypsy-27_DAn-I#LTR/Gypsy	5445	7204	4236
Gypsy-4_DGri-LTR#LTR/Gypsy	1386	2695	1864
Gypsy-33_DAn-I#LTR/Gypsy	6095	7529	4124
Gypsy-16_DAn-LTR#LTR/Gypsy	196	161	82
Gypsy-34_DEl-I#LTR/Gypsy	4724	6424	5548
Gypsy-14_DTa-LTR#LTR/Gypsy	351	542	295
Gypsy-21_DY-I#LTR/Gypsy	9271	32398	15051
Gypsy-8_DAn-LTR#LTR/Gypsy	1768	5631	8056
Gypsy-14_DEl-LTR#LTR/Gypsy	212	172	411
Gypsy-46_DWil-LTR#LTR/Gypsy	347	309	230
Gypsy-4_DSim-I#LTR/Gypsy	6364	19569	26614
Gypsy-1_DKi-LTR#LTR/Gypsy	328	418	617
Gypsy-20_DTa-LTR#LTR/Gypsy	1730	4359	1171
Gypsy-7_DBi-LTR#LTR/Gypsy	359	509	509
Gypsy-63_DWil-LTR#LTR/Gypsy	611	1752	565
Gypsy-28_DEl-LTR#LTR/Gypsy	2024	2445	1244
Gypsy-4_DVir-LTR#LTR/Gypsy	380	8118	6590
Gypsy-7_DAn-I#LTR/Gypsy	3962	8197	4612
Gypsy-23_DEl-LTR#LTR/Gypsy	150	194	509
Gypsy-7_DEu-I#LTR/Gypsy	6354	14597	7113
Gypsy-8_DBi-I#LTR/Gypsy	4420	6582	5481
Gypsy-52_DWil-I#LTR/Gypsy	7210	14070	21632
Gypsy-6_DEl-I#LTR/Gypsy	6048	6723	5750
Gypsy-14_DFi-I#LTR/Gypsy	5171	9783	21214
Gypsy-4_DSe-LTR#LTR/Gypsy	362	388	283
Gypsy-14_DBi-I#LTR/Gypsy	5250	7137	5742
Gypsy-1A_DPer-LTR#LTR/Gypsy	826	1735	830
Gypsy-5_DSe-LTR#LTR/Gypsy	421	1293	474
Gypsy-37_DAn-LTR#LTR/Gypsy	2183	4403	2263
Gypsy-10_DEl-LTR#LTR/Gypsy	939	1965	1271
Gypsy-1_DSe-I#LTR/Gypsy	6428	10613	6671
Gypsy-8_DFi-LTR#LTR/Gypsy	107	1534	1705
Gypsy-1_DEl-I#LTR/Gypsy	4369	7809	7609
Gypsy-12_DTa-I#LTR/Gypsy	6968	10113	6097
Gypsy-14_DTa-I#LTR/Gypsy	4389	7511	5561
Gypsy-55_DWil-LTR#LTR/Gypsy	352	603	264
Gypsy-14_DEl-I#LTR/Gypsy	4313	9885	10974
Gypsy-4_DEl-I#LTR/Gypsy	4663	11324	6874
Gypsy-27_DEl-I#LTR/Gypsy	5500	7029	11413
Gypsy-5_DEr-LTR#LTR/Gypsy	1827	3745	4328
Gypsy-6_DEl-LTR#LTR/Gypsy	1036	1167	663
Gypsy-20_DBp-LTR#LTR/Gypsy	305	4159	898
Gypsy-9_DBi-LTR#LTR/Gypsy	1920	3160	3852
Gypsy-24_DBp-I#LTR/Gypsy	5009	13765	8086
Gypsy-12_DVir-LTR#LTR/Gypsy	1303	4947	2561
Gypsy-58_DWil-LTR#LTR/Gypsy	311	380	206
Gypsy-6_DVir-LTR#LTR/Gypsy	394	553	531
Gypsy-4_DFi-LTR#LTR/Gypsy	290	335	193
Gypsy-7_DPer-LTR#LTR/Gypsy	1657	27124	267047
Gypsy-12_DSim-I#LTR/Gypsy	4783	11782	9174
Gypsy-6_DAn-LTR#LTR/Gypsy	263	366	109
Gypsy-47_DWil-I#LTR/Gypsy	7292	9625	6430
Gypsy-2_Deu-LTR#LTR/Gypsy	162	180	110
Gypsy-14_DFi-LTR#LTR/Gypsy	366	492	1179
Gypsy-31_DP-LTR#LTR/Gypsy	1413	2428	2141
Gypsy-8_DSe-LTR#LTR/Gypsy	288	446	193
Gypsy-1_DSim-I#LTR/Gypsy	7022	29034	25813
Gypsy-20_DAn-I#LTR/Gypsy	6013	9145	19556
Gypsy-2_DGri-LTR#LTR/Gypsy	421	639	406
Gypsy-18_DAn-LTR#LTR/Gypsy	217	202	110
Gypsy-3_DGri-I#LTR/Gypsy	5718	10030	6397
Gypsy-6_DBi-I#LTR/Gypsy	4802	16255	10371
Gypsy-7_DFi-I#LTR/Gypsy	6883	9475	5017
Gypsy-41_DEl-I#LTR/Gypsy	6843	13775	11309
Gypsy-35_DAn-I#LTR/Gypsy	5505	11167	8161
Gypsy-26_DYa-LTR#LTR/Gypsy	266	530	100
Gypsy-64_DWil-I#LTR/Gypsy	4187	7919	4645
Gypsy-18_DBp-I#LTR/Gypsy	4563	6297	4480
Gypsy-8_DBp-LTR#LTR/Gypsy	263	253	154
Gypsy-25_DP-I#LTR/Gypsy	5558	6946	5373
Gypsy-2_DBi-LTR#LTR/Gypsy	141	98	35
Gypsy-56_DWil-I#LTR/Gypsy	4711	9212	8144
Gypsy-3_DKi-I#LTR/Gypsy	6356	13303	11294
Gypsy-9_DBi-I#LTR/Gypsy	5628	6484	4933
Gypsy-24_DAn-I#LTR/Gypsy	4691	6256	3246
Gypsy-16_DBi-LTR#LTR/Gypsy	304	423	118
Gypsy3_DV-LTR#LTR/Gypsy	1043	6672	2314
Gypsy-13_DAn-I#LTR/Gypsy	6026	9055	6199
Gypsy-31_DEl-LTR#LTR/Gypsy	353	572	614
Gypsy-23_DY-I#LTR/Gypsy	6666	13918	13259
Gypsy-2_DKi-I#LTR/Gypsy	5430	8335	4080
Gypsy-52_DEl-I#LTR/Gypsy	7296	10125	12922
Gypsy-8_DSim-I#LTR/Gypsy	5412	13001	6078
Gypsy-46_DEl-LTR#LTR/Gypsy	2025	3623	1620
Gypsy-11_DTa-I#LTR/Gypsy	5987	10746	7169
Gypsy-10_DEu-I#LTR/Gypsy	4355	5672	11160
Gypsy-21_DEl-LTR#LTR/Gypsy	2371	8612	32895
Gypsy-5_DAn-I#LTR/Gypsy	6799	8445	4718
Gypsy-62_DWil-I#LTR/Gypsy	7169	15058	9598
Gypsy-6_DEu-LTR#LTR/Gypsy	277	168	69
Gypsy-57_DEl-I#LTR/Gypsy	4350	49430	17764
Gypsy-50_DWil-LTR#LTR/Gypsy	509	1570	1994
Gypsy-1_DBi-I#LTR/Gypsy	5451	11702	8626
Gypsy-2_DSe-LTR#LTR/Gypsy	253	351	97
Gypsy-48_DEl-LTR#LTR/Gypsy	196	196	209
Gypsy-5_DBi-LTR#LTR/Gypsy	318	563	216
Gypsy-6_DBp-LTR#LTR/Gypsy	372	452	268
Gypsy-3_DVir-I#LTR/Gypsy	6290	69629	453180
Gypsy-10_DPer-I#LTR/Gypsy	5007	7974	11355
Gypsy-7_DSe-LTR#LTR/Gypsy	258	232	129
Gypsy-5_DFi-I#LTR/Gypsy	4589	10538	16392
Gypsy-11_DEu-LTR#LTR/Gypsy	337	657	212
Gypsy-26_DAn-LTR#LTR/Gypsy	213	345	145
Gypsy-11_DPer-LTR#LTR/Gypsy	2035	1722	1457
Gypsy-16_DTa-I#LTR/Gypsy	4557	12607	6447
Gypsy-2_DTa-I#LTR/Gypsy	5131	8889	11235
Gypsy-16_DEl-LTR#LTR/Gypsy	624	776	631
Gypsy-30_DAn-LTR#LTR/Gypsy	475	1018	996
Gypsy-49_DWil-I#LTR/Gypsy	4850	13456	10318
[truncated: 323 more rows]
[truncated: 2 more columns]
