# Supplementary material for: Unique structure and positive selection promote the rapid divergence of Drosophila Y chromosomes
Source: eLife. 2022 Jan 6;11:e75795. doi: 10.7554/eLife.75795 (PMC8794474; doi:10.7554/eLife.75795)
Supplement: Supplementary file 11. — We listed the gene conversion rates and gene similarities on each Y-linked ampliconic gene family (e.g., Lhk-1, Lhk-2, and CK2ßtes-Y). We estimated gene conversion rates using both gene similarities (p) and population recombination rates (Rmin and rho). [file elife-75795-supp11.xlsx]

## Sheet: Sheet1
Supplementary file 11. Gene conversion rates for Y-linked ampliconic genes in the D. simulans clade. We listed the gene conversion rates and gene similarities on each Y-linked ampliconic gene family (e.g., Lhk-1, Lhk-2, and CK2ßtes-Y). We estimated gene conversion rates using both gene similarities (p) and population recombination rates (Rmin and rho).
Locus	# of samples	# of sites	# of used sites	recombination event/per site from rho87	recombination event/per site from Rmin	recombination event/per site from ThetaPi	Rmin	rho87
CK2ßtes-Y
Dmau	75	768	768	0.000794285	0.000277778	1.01535e-05	16	45.7508
Dsim	64	768	768	0.0036036	0.000264486	8.70681e-06	13	177.124
Dsech	11	743	743	0.0250538	0.00061177	8.54313e-07	5	204.765
Dmel_PCKR	107	588	588	0.000118986	0.000174836	1.58708e-05	11	7.48612
Dmel_SuSte	416	1112	1112	0.000467243	4.97198e-05	0.000136967	23	216.143
All Lhk
Dmau	24	1536	1536	0.000414727	0.000244141	8.18327e-06	9	15.2885
Dsim	66	1570	1570	0.000180049	0.000173712	2.30084e-05	18	18.6567
Dsech	32	1518	1518	0.000428397	0.000288208	1.06559e-05	14	20.8098
Lhk-1
Dmau	11	1525	1525	0.00185347	5.96125e-05	9.31054e-06	1	31.0919
Dsim	29	1544	1544	0.000295797	0.000178667	1.54038e-05	8	13.2446
Dsech	10	1515	1515	0.00272021	0.000462046	6.89975e-06	7	41.2112
Lhk-2
Dmau	13	1518	1518	0.00559354	0.000202696	9.32064e-06	4	110.383
Dsim	37	1491	1491	0.0028837	0.000181268	3.01645e-05	10	159.085
Dsech	22	1518	1518	0.00103212	0.00023955	6.67402e-06	8	34.4688
