# Supplementary material for: Unique structure and positive selection promote the rapid divergence of Drosophila Y chromosomes
Source: eLife. 2022 Jan 6;11:e75795. doi: 10.7554/eLife.75795 (PMC8794474; doi:10.7554/eLife.75795)
Supplement: Supplementary file 12. — We showed raw results and LRT tests for branch and branch-site model analyses from PAML. We also report rates of protein evolution for each branch in each model and sites under positive selection in the branch-site model analyses. [file elife-75795-supp12.xlsx]

## Sheet: 7 species
Supplementary file 12. PAML results for branch and branch-site model analyses of Lhk in the D. simulans clade. We showed raw results and LRT tests for branch and branch-site model analyses from PAML. We also report rates of protein evolution for each branch in each model and sites under positive selection in the branch-site model analyses.
CodonFreq=0									CodonFreq=1									CodonFreq=2
	ω1	ω2	ω3	ω4	L	2∆lnL	LRT's P			ω1	ω2	ω3	ω4	L	2∆lnL	LRT's P			ω1	ω2	ω3	ω4	L	2∆lnL	LRT's P
ωA=ωB=ωC=ωD	0.17413 (ABCD)				-3250.74				ωA=ωB=ωC=ωD	0.1699 (ABCD)				-3248.65				ωA=ωB=ωC=ωD	0.1408 (ABCD)				-3213.76
ωA≠ωB=ωC=ωD	0.1083 (A)	1.0535 (BCD)			-3218.26	64.9428	7.71054e-16		ωA≠ωB=ωC=ωD	0.1047 (A)	1.0513 (BCD)			-3215.3	66.7023	3.1576e-16		ωA≠ωB=ωC=ωD	0.0846 (A)	0.9111 (BCD)			-3178.59	70.3415	4.9878e-17
ωA=ωC=ωD≠ωB	0.1175 (ACD)	1.4879 (B)			-3219.76	61.9493	3.52408e-15		ωA=ωC=ωD≠ωB	0.1139 (ACD)	1.4828 (B)			-3216.97	63.3522	1.72863e-15		ωA=ωC=ωD≠ωB	0.0927 (ACD)	1.283 (B)			-3180.68	66.1636	4.15007e-16
ωA≠ωB=ωD≠ωC	0.1082 (A)	1.4856 (BD)	0.4326 (C)		-3216.3	3.92089	0.0476895		ωA≠ωB=ωD≠ωC	0.1047 (A)	1.4806 (BD)	0.4330 (C)		-3213.35	3.89783	0.0483486		ωA≠ωB=ωD≠ωC	0.0846 (A)	1.2815 (BD)	0.3781 (C)		-3176.67	3.83775	0.0501108
ωA≠ωB≠ωC=ωD	0.1082 (A)	1.1335 (D)	0.9813 (BC)		-3218.23	0.066768	0.796102		ωA≠ωB≠ωC=ωD	0.1047 (A)	1.1283 (D)	0.9815 (BC)		-3215.26	0.062398	0.802745		ωA≠ωB≠ωC=ωD	0.0846 (A)	0.9726 (D)	0.8555 (BC)		-3178.57	0.0528	0.818261
ωA≠ωE≠ωB=ωD≠ωC	0.1097 (A)	1.486 (BD)	0.4326 (C)	0.0943 (E)	-3216.25	0.100288	0.751484		ωA≠ωE≠ωB=ωD≠ωC	0.1058 (A)	1.4809 (BD)	0.433 (C)	0.0943 (E)	-3213.32	0.058018	0.809656		ωA≠ωE≠ωB=ωD≠ωC	0.085 (A)	1.2817 (BD)	0.3781 (C)	0.0809 (E)	-3176.67	0.010678	0.917698
All Y branchsite									All Y branchsite									All Y branchsite
Branch-site	ω0	ω1			L	2∆lnL	LRT's P		Branch-site	ω0	ω1			L	2∆lnL	LRT's P		Branch-site	ω0	ω1			L	2∆lnL	LRT's P
H0					-3157.24				H0					-3155.44				H0					-3116.1
H1					-3150.72	13.0387	0.00030512		H1					-3148.9	13.0914	0.000296657		H1					-3110.74	10.7225	0.00105841
H0									H0									H0
dN/dS (ω) for site classes (K=4)									dN/dS (ω) for site classes (K=4)									dN/dS (ω) for site classes (K=4)
site class	0	1	2a	2b					site class	0	1	2a	2b					site class	0	1	2a	2b
proportion	0.32953	0.04953	0.5398	0.08114					proportion	0.33082	0.04789	0.54273	0.07857					proportion	0.39005	0.04865	0.49905	0.06224
background ω	0.0136	1	0.0136	1					background ω	0.01452	1	0.01452	1					background ω	0.01584	1	0.01584	1
foreground ω	0.0136	1	1	1					foreground ω	0.01452	1	1	1					foreground ω	0.01584	1	1	1
H1									H1									H1
dN/dS (ω) for site classes (K=4)									dN/dS (ω) for site classes (K=4)									dN/dS (ω) for site classes (K=4)
site class	0	1	2a	2b					site class	0	1	2a	2b					site class	0	1	2a	2b
proportion	0.66416	0.0991	0.206	0.03074					proportion	0.66416	0.0991	0.206	0.03074					proportion	0.66416	0.0991	0.206	0.03074
background ω	0.01418	1	0.01418	1					background ω	0.01418	1	0.01418	1					background ω	0.01418	1	0.01418	1
foreground ω	0.01418	1	4.87444	4.87444					foreground ω	0.01418	1	4.87444	4.87444					foreground ω	0.01418	1	4.87444	4.87444
Bayes Empirical Bayes (BEB) analysis (Yang, ωong & Nielsen 2005. Mol. Biol. Evol. 22:1107-1118)									Bayes Empirical Bayes (BEB) analysis (Yang, ωong & Nielsen 2005. Mol. Biol. Evol. 22:1107-1118)									Bayes Empirical Bayes (BEB) analysis (Yang, ωong & Nielsen 2005. Mol. Biol. Evol. 22:1107-1118)
Positive sites for foreground lineages Prob(ω>1):									Positive sites for foreground lineages Prob(ω>1):									Positive sites for foreground lineages Prob(ω>1):
Site	a.a.	Prob							Site	a.a.	Prob							Site	a.a.	Prob
2	H	0.924							2	H	0.927							2	H	0.924
4	I	0.997**							4	I	0.997**							4	I	0.998**
8	G	0.926							8	G	0.924							8	G	0.918
11	H	1.000**							11	H	1.000**							11	H	1.000**
12	F	0.93							12	F	0.93							12	F	0.917
32	V	0.996**							32	V	0.997**							32	V	0.997**
37	H	0.924							37	H	0.919							37	H	0.902
38	F	0.93							38	F	0.934							38	F	0.929
39	A	0.93							39	A	0.926							39	A	0.913
40	E	0.927							40	E	0.926							40	E	0.9
75	V	0.997**							75	V	0.996**							75	V	0.996**
82	M	0.931							82	M	0.936							82	M	0.929
86	V	0.923							86	V	0.924							86	V	0.906
96	R	0.935							96	R	0.935							96	R	0.925
99	N	1.000**							99	N	1.000**							99	N	1.000**
100	Y	0.999**							100	Y	0.999**							100	Y	1.000**
132	D	0.923							132	D	0.92							132	D	0.895
139	L	0.925							139	L	0.924							139	L	0.914
142	V	0.929							142	V	0.928							142	V	0.912
150	G	0.718							150	G	0.727							150	G	0.732
156	P	0.932							156	P	0.932							156	P	0.93
158	P	0.931							158	P	0.933							158	P	0.929
159	P	0.93							159	P	0.932							159	P	0.932
166	H	0.924							166	H	0.919							166	H	0.901
167	K	0.581							167	K	0.595							167	K	0.54
169	K	0.805							169	K	0.803							169	K	0.811
178	N	0.695							178	N	0.703							178	N	0.664
187	G	0.931							187	G	0.929							187	G	0.922
188	N	0.925							188	N	0.925							188	N	0.915
189	A	0.932							189	A	0.935							189	A	0.934
193	D	0.997**							193	D	0.997**							193	D	0.998**
196	F	0.937							196	F	0.939							196	F	0.932
198	E	0.927							198	E	0.925							198	E	0.9
199	D	0.998**							199	D	0.998**							199	D	0.998**
218	T	0.93							218	T	0.926							218	T	0.915
250	D	0.928							250	D	0.926							250	D	0.908
253	H	0.923							253	H	0.926							253	H	0.921
267	E	0.949							267	E	0.949							267	E	0.921
272	G	0.931							272	G	0.928							272	G	0.92
324	F	0.934							324	F	0.93							324	F	0.918
