# Supplementary material for: Unique structure and positive selection promote the rapid divergence of Drosophila Y chromosomes
Source: eLife. 2022 Jan 6;11:e75795. doi: 10.7554/eLife.75795 (PMC8794474; doi:10.7554/eLife.75795)
Supplement: Supplementary file 13. — We list the number of synonymous, nonsynonymous and UTR changes in highly and lowly expressed copies of Y-linked genes families. We suggest that highly expressed copies evolve under stronger selection (positive or purifying) than other copies. Therefore, we compared the number of synonymous changes over nonsynonymous changes in highly expressing copies to the other copies. See Supplementary file 21 for detailed information. [file elife-75795-supp13.xlsx]

## Sheet: Sheet1
Supplementary file 13. The number of new mutations observed in highly and lowly expressed copies of Y-linked gene families. We list the number of synonymous, nonsynonymous and UTR changes in highly and lowly expressed copies of Y-linked genes families. We suggest that highly expressed copies evolve under stronger selection (positive or purifying) than other copies. Therefore, we compared the numb…
	CK2ßtes-Y						Lhk-1						Lhk-2
	Dmau			Dsim			Dmau			Dsim			Dmau			Dsim
	Lowly expressing copies	Highly expressing copies	Total	Lowly expressing copies	Highly expressing copies	Total	Lowly expressing copies	Highly expressing copies	Total	Lowly expressing copies	Highly expressing copies	Total	Lowly expressing copies	Highly expressing copies	Total	Lowly expressing copies	Highly expressing copies	Total
Nonsynonymous changes	5	12	171	0	7	136	7	3	38	11	2	61	2	5	44	2	5	89
Synonymous changes	1	3	62	1	3	46	3	1	17	2	2	17	4	2	21	4	2	37
Changes UTR	0	0	59	1	2	59	7	5	31	5	8	36	0	4	23	2	3	73
