# Supplementary material for: Unique structure and positive selection promote the rapid divergence of Drosophila Y chromosomes
Source: eLife. 2022 Jan 6;11:e75795. doi: 10.7554/eLife.75795 (PMC8794474; doi:10.7554/eLife.75795)
Supplement: Supplementary file 14. — We showed raw results and LRT tests for branch and branch-site model analyses from PAML. We also report rates of protein evolution for each branch in each model and sites under positive selection in the branch-site model analyses. [file elife-75795-supp14.xlsx]

## Sheet: codon
Supplementary file 14. PAML results for branch and branch-site model analyses of CK2ßtes-Y in the D. simulans clade. We showed raw results and LRT tests for branch and branch-site model analyses from PAML. We also report rates of protein evolution for each branch in each model and sites under positive selection in the branch-site model analyses.
CodonFreq=0										CodonFreq=1										CodonFreq=2
	ω0	ω1	ω2	ω3	L	2∆lnL	LRT's P				ω0	ω1	ω2	ω3	L	2∆lnL	LRT's P				ω0	ω1	ω2	ω3	L	2∆lnL	LRT's P
ωA=ωB=ωC=ωD	0.3528 (ABCD)				-3295.01					ωA=ωB=ωC=ωD	0.3269 (ABCD)				-3320.21					ωA=ωB=ωC=ωD	0.1982 (ABCD)				-3293.44
ωA=ωB≠ωC=ωD	0.2459 (AB)	1.0499 (CD)			-3272	46.0116	1.17553e-11			ωA=ωB≠ωC=ωD	0.2267 (AB)	0.9762 (CD)			-3297.04	46.3412	9.93516e-12			ωA=ωB≠ωC=ωD	0.137 (AB)	0.5921 (CD)			-3271.27	44.3571	2.73623e-11
ωA≠ωB=ωC=ωD	0.1953 (A)	0.6794 (BCD)			-3271.53	46.9488	7.28669e-12			ωA≠ωB=ωC=ωD	0.1777 (A)	0.6361 (BCD)			-3295.97	48.4671	3.35876e-12			ωA≠ωB=ωC=ωD	0.1026 (A)	0.399 (BCD)			-3267.34	52.2113	4.98388e-13
ωA≠ωB≠ωC=ωD	0.1953 (A)	0.4230 (B)	1.0458 (CD)		-3266.33	10.4094	0.00125373			ωA≠ωB≠ωC=ωD	0.1778 (A)	0.3985 (B)	0.9719 (CD)		-3290.94	10.0697	0.00150725			ωA≠ωB≠ωC=ωD	0.1027 (A)	0.2623 (B)	0.5836 (CD)		-3263.52	7.63393	0.00572803
ωA≠ωB≠ωC≠ωD	0.1953 (A)	0.4196 (B)	0.7708 (D)	1.5280 (C)	-3265.04	2.5798	0.108235			ωA≠ωB≠ωC≠ωD	0.1777 (A)	0.3953 (B)	0.7289 (D)	1.3909 (C)	-3289.78	2.31359	0.128248			ωA≠ωB≠ωC≠ωD	0.1027 (A)	0.2596 (B)	0.4654 (D)	0.7789 (C)	-3262.82	1.41307	0.234548
Branch-site	ω0	ω1			L	2∆lnL	LRT's P			Branch-site	ω0	ω1			L	2∆lnL	LRT's P			Branch-site	ω0	ω1			L	2∆lnL	LRT's P
H0					-3202.38					H0					-3226.82					H0					-3211.75
H1					-3199.11	6.53917	0.0105524			H1					-3223.81	6.02173	0.0141308			H1					-3211.2	1.10658	0.292827
H0										H0										H0
dN/dS (ω) for site classes (K=4)										dN/dS (ω) for site classes (K=4)										dN/dS (ω) for site classes (K=4)
site class	0	1	2a	2b						site class	0	1	2a	2b						site class	0	1	2a	2b
proportion	0.39886	0.23097	0.23442	0.13575						proportion	0.40455	0.22277	0.24034	0.13235						proportion	0.44219	0.18335	0.2647	0.10976
background ω	0.05198	1	0.05198	1						background ω	0.05183	1	0.05183	1						background ω	0.057	1	0.057	1
foreground ω	0.05198	1	1	1						foreground ω	0.05183	1	1	1						foreground ω	0.057	1	1	1
H1										H1										H1
dN/dS (ω) for site classes (K=4)										dN/dS (ω) for site classes (K=4)										dN/dS (ω) for site classes (K=4)
site class	0	1	2a	2b						site class	0	1	2a	2b						site class	0	1	2a	2b
proportion	0.37369	0.234	0.24125	0.15106						proportion	0.4351	0.23041	0.21869	0.11581						proportion	0.46469	0.19069	0.24434	0.10027
background ω	0.04513	1	0.04513	1						background ω	0.05597	1	0.05597	1						background ω	0.05856	1	0.05856	1
foreground ω	0.04513	1	2.20553	2.20553						foreground ω	0.05597	1	1.93793	1.93793						foreground ω	0.05856	1	1.37586	1.37586
Bayes Empirical Bayes (BEB) analysis (Yang, ωong & Nielsen 2005. Mol. Biol. Evol. 22:1107-1118)										Bayes Empirical Bayes (BEB) analysis (Yang, ωong & Nielsen 2005. Mol. Biol. Evol. 22:1107-1118)										Bayes Empirical Bayes (BEB) analysis (Yang, ωong & Nielsen 2005. Mol. Biol. Evol. 22:1107-1118)
Positive sites for foreground lineages Prob(ω>1):										Positive sites for foreground lineages Prob(ω>1):										Positive sites for foreground lineages Prob(ω>1):
Site	a.a.	Prob								Site	a.a.	Prob								Site	a.a.	Prob
7	K	0.576								7	K	0.56								7	K	0.588
8	A	0.899								8	A	0.923								8	A	0.986*
15	V	0.816								15	V	0.829								15	V	0.845
33	D	0.996**								33	D	0.996**								18	N	0.521
34	K	0.773								34	K	0.774								33	D	0.998**
35	F	0.729								35	F	0.75								34	K	0.682
37	L	0.813								37	L	0.803								35	F	0.625
38	T	0.978*								38	T	0.982*								37	L	0.779
41	E	0.75								41	E	0.717								38	T	0.983*
43	F	0.598								43	F	0.599								41	E	0.621
44	K	0.963*								44	K	0.972*								44	K	0.993**
48	D	0.691								48	D	0.708								48	D	0.913
49	V	0.573								49	V	0.595								49	V	0.725
50	V	0.546								50	V	0.542								50	V	0.563
52	E	0.505								52	E	0.51								54	L	0.989*
54	L	0.945								54	L	0.964*								61	V	0.664
58	S	0.593								58	S	0.542								66	E	0.649
61	V	0.801								61	V	0.789								68	L	0.886
66	E	0.621								66	E	0.653								78	M	0.894
68	L	0.922								68	L	0.931								81	R	0.869
78	M	0.729								78	M	0.781								84	E	0.958*
80	A	0.512								81	R	0.816								88	L	0.878
81	R	0.791								84	E	0.875								90	Y	0.863
84	E	0.818								88	L	0.836								96	G	0.878
88	L	0.817								90	Y	0.829								97	S	0.631
90	Y	0.783								96	G	0.826								100	K	0.981*
96	G	0.806								97	S	0.77								101	F	0.982*
97	S	0.808								100	K	0.983*								104	K	0.999**
100	K	0.980*								101	F	0.981*								112	L	0.677
101	F	0.975*								104	K	0.995**								115	E	0.513
104	K	0.994**								112	L	0.775								118	H	0.562
112	L	0.784								115	E	0.518								120	T	0.669
115	E	0.527								118	H	0.507								124	Y	0.669
118	H	0.506								120	T	0.612								127	S	0.673
120	T	0.628								124	Y	0.795								131	V	0.702
124	Y	0.784								127	S	0.596								133	R	0.519
127	S	0.522								131	V	0.642								134	P	0.753
131	V	0.618								133	R	0.671								138	P	0.732
133	R	0.702								134	P	0.764								139	K	0.679
134	P	0.796								138	P	0.867								150	P	0.753
138	P	0.881								139	K	0.663								152	M	0.976*
139	K	0.662								150	P	0.76								155	M	0.979*
150	P	0.792								152	M	0.987*								157	L	0.689
152	M	0.986*								155	M	0.986*								167	E	0.586
155	M	0.987*								157	L	0.589								157	L	0.589
157	L	0.566								159	M	0.596								159	M	0.596
159	M	0.616								167	E	0.618								167	E	0.618
167	E	0.587
