# Supplementary material for: Unique structure and positive selection promote the rapid divergence of Drosophila Y chromosomes
Source: eLife. 2022 Jan 6;11:e75795. doi: 10.7554/eLife.75795 (PMC8794474; doi:10.7554/eLife.75795)
Supplement: Supplementary file 15. — We listed the position and sizes of all indels we found in Y-linked duplications. We also inferred the potential microhomologies used for MHEJ repairing. We also infer other DSB repairing mechanisms, including tandem duplications and replication slippages, based on the sequence information. [file elife-75795-supp15.xlsx]

## Sheet: Sheet1
Supplementary file 15. Indels in Y-linked duplications in D. melanogaster and the D. simulans clade. We listed the position and sizes of all indels we found in Y-linked duplications. We also inferred the potential microhomologies used for MHEJ repairing. We also infer other DSB repairing mechanisms, including tandem duplications and replication slippages, based on the sequence information.
		indel size
Gene	Position	mel	sim	sec	mau	sim_clade	Length of microhomology	mechanism (td:tandem duplication, sl:replication slippage)
Ac76E	342			-6			1
Ac76E	435			6				td
Ac76E	669			1				sl
Ac76E	1033			6				td
Ank2	216				-3		0
Ank2	411				276			td(complex)
Ank2	981					-3	3
Ank2	1082					-34	1
Ank2	1082				-1
Ank2	1262				1
Ank2	1348					-1		sl
Ank2	1397		-3				0
Ank2	1525		-770				0
Ank2	1578				-1			sl
Ank2	1781				-11		2
Ank2	1797				-3		0
Ank2	1889				-6			sl
Ank2	2615					-10	5
Ank2	2817		-43				0
Ank2	2961					-8	2
Ank2	2969				-82		0
Ank2	3081		13					td
Ank2	3092				2
Ank2	3122					-1
Ank2	3380				-11		2
Ank2	3488					-3	2
Ank2	3482		-34				2
Ank2	3658		-1
Ank2	3799		-118				1
Ank2	3831					6		td
Ank2	3891				-1			sl
Ank2	3899				-30		4
Ank2	3909		12					td
Ank2	4093					-99	0
Ank2	4192				-1
Ank2	4296		-16				1
CG4455	42				-76		0
CG4455	384		-9				0
CG4455	418		-114				1
CG4455	524		19
CG4455	500				-114		0
CG4455	632		-11				2
CG4455	658		-14				2
CG4455	671		-48				0
CG4455	757					-2	1
CG4455	814		-21				2
CG4455	875		1					sl
CG4455	938				4			sl
CG4455	941		1					sl
CG4455	942		-1					sl
CG5645	218			-11			1
CG5645	335			2
CG16781	228				-3		0
CG16781	329				-503		2
CG16781	1403				3			td
CG16781	1494				-325		0
CG16781	2044				-4		2
CG16781	2580				-1			sl
CG16781	3267				-1
CG16781	3602				-123		2
CG16781	3783				-7			sl
CG16781	3991				12
CG16781	4093				-1			sl
CG16781	4148				-64		1
CG16781	4756				2
CG16781	4789				2
CG16781	5008				1			sl
CG16781	5373				-1			sl
CG16781	5394				5			td(complex)
CG32820	165			13				td(complex)
CG32820	574		3					td
CG32820	652		-10				1
CG32820	1102		-1					sl
CG32820	1140		-16				2
COX6B	2213			-1				sl
COX6B	2379			-6			1
COX6B	4045			3				td
COX6B	4298			-1
COX6B	4525			6				td
Cyp1	373			-1				sl
Cyp1	495			-1				sl
elf3m	689			-5			1
elf3m	1396			-21			6
elf3m	1593			-49			0
His1	162				1			sl
His1	167				-1
His1	307				-1			sl
His3.3B	207				5
His3.3B	219					-1
His3.3B	355				-9		4
His3.3B	434			-47			5
Hrb27C	2551		4					td
Hrb27C	5967				-6		2
Hrb27C	6270				4			td
Hrb27C	6334				-21		3
Hrb27C	6594				-26		0
Hrb27C	6785				-1
Hrb27C	6793				-57		0
Neurochondrin	943				-14		0
Neurochondrin	1151				-1
Neurochondrin	1773				4
Neurochondrin	1837				-167		0
Neurochondrin	2115				-31		0
Nmdar	552				-10		4
Nmdar	575				-14		0
Nmdar	638				-1			sl
Nmdar	692				-1
Nmdar	810				9			td
Nmdar	866				3
Nmdar	869				-313		1
Nmdar	1115				-12		0
Nmdar	1185				-12		4
Nmdar	1205				-1
Nmdar	1246				-14		2
Nmdar	1266				-6		1
Nmdar	1386				5
Nmdar	1469				-4		3
Nmdar	1499				6			td
Nmdar	1558				-1
Nmdar	1699				5
Nmdar	1762				3
Nmdar	1875				-1
Nmdar	1949				4			td
Nmdar	2038				-7		1
Nmdar	2178				-5		2
Nmdar	2299				15			td
Nmdar	2299				-3		0
Nmdar	2302				-53		0
Nmdar	2374				-1
Nmdar	2427				-3		2
Nmdar	2499				-1
Nmdar	2505				-20		0
Nmdar	2594				-1			sl
Nmdar	2679				-1			sl
Nmdar	2727				-127		3
Nmdar	2762				-6		2
Nmdar	2762				-1
Nmdar	2765				-4		3
Nmdar	2947				-1
Nmdar	3002				-1			sl
Nmdar	3092				-8		8
Nmdar	3098				1			sl
Nmdar	3132				-1
Nmdar	3147				1			sl
Nmdar	3190				1
Nmdar	3204				1			sl
Nmdar	3273				-1			sl
Nmdar	3298				-11		1
Nmdar	3338				-1			sl
Nmdar	3584				-6		6
Nmdar	3944				-1			sl
Nmdar	4097				1
Nmdar	4175				-1			sl
Nmdar	4211				4			td
Nmdar	4224				-6		2
Nmdar	4498				-14		0
Nmdar	4527				9
Nmdar	4530				-1			sl
Nmdar	4536				1			sl
Nmdar	4561				-1
Nmdar	4655				1			sl
Nmdar	4765				1
Nmdar	4777				-6		1
Nmdar	4910				-10		1
Nmdar	4961				1			sl
Nmdar	4979				-1
Nmdar	4998				-30		3
Nmdar	5042				-3		3
Sclp	784			-17			3
Sclp	876			-11			3
Tctp	83					-1		sl
Tctp	270					-54	4
Tctp	324					-12	0
Tctp	265		-20				1
Tctp	269				-1
Tctp	330			-1
Tctp	335			-1
Tctp	603		1
Tctp	609		3
Tctp	869					1
Tctp	913	1
CR43975	89	1						sl
CR43975	93	-1
CR43975	103	-1
CR43975	166	-1						sl
CR43975	168	2						td
CR43975	178	-1						sl
CR43975	179	-1						sl
CR43975	181	-1						sl
CR43975	206	-1
CR43975	208	-4					0
CR43975	227	-1						sl
CR43975	259	-21					4
CR43975	276	-1
CR43975	278	-2
CR43975	289	-1
CR43975	288	-5					1
CR43975	300	1
CR43975	301	1
CR43975	316	1
CR43975	327	-1						sl
CR43975	328	-1						sl
CR43975	329	1						sl
CR43975	349	-3					1
CR43975	349	-1
CR43975	354	-2					1
CR43975	357	-1						sl
CR43975	360	3						td
CR43975	375	1
CR43975	413	-1						sl
CR43975	418	-4					1
CR43975	418	-1
CR43975	420	-1
CR43975	432	-1						sl
CR43975	438	1
CR43975	443	-1
fru	2740	-2					1
fru	2819	-19					0
pKa-R1	82	-1
pKa-R1	129	-1
smt3	103		-1					sl
smt3	140		-11				2
CG5886	72	-3					1
