# Supplementary material for: Unique structure and positive selection promote the rapid divergence of Drosophila Y chromosomes
Source: eLife. 2022 Jan 6;11:e75795. doi: 10.7554/eLife.75795 (PMC8794474; doi:10.7554/eLife.75795)
Supplement: Supplementary file 16. — We listed the position and sizes of polymorphic indels from D. melanogaster and D. simulans populations. We also inferred the potential microhomologies causing the deletions. [file elife-75795-supp16.xlsx]

## Sheet: a. intergenic region
Supplementary file 16. Polymorphic indels in D. melanogaster and D. simulans populations. We listed the position and sizes of polymorphic indels from D. melanogaster and D. simulans populations. We also inferred the potential microhomologies causing the deletions.
Species	Chromsome	Position	Reference	Variation	Indel size	Length of microhomology
Dmel	4	167670	CG	C	-1	NA
Dmel	4	234755	ATCTCA	A	-5	NA
Dmel	4	275272	GC	G	-1	NA
Dmel	4	628666	GGCTGGGCCAAA	G	-11	1
Dmel	4	813150	T	AGGGCTAAGA	9	NA
Dmel	4	817580	TTAAATAAGTTAATA	T	-14	0
Dmel	4	817879	G	GC	1	NA
Dmel	4	818995	ATA	A	-2	NA
Dmel	4	1001020	T	TAAT	3	NA
Dmel	4	1008074	G	GTCAAAACTGTCACGCCCACACATTTACGAAATGTGTTGATATTTCTGCACAATTTTATTAGTCATATAATTTCTATCGATATGGAAAAAAATTTTGCCACGCTCACTTATTTTACATTTTTAAATTCCCC	130	NA
Dmel	4	1008080	C	CT	1	NA
Dmel	4	1008089	C	CCCAGA	5	NA
Dmel	2L	81103	TAACG	A	-4	NA
Dmel	2L	91132	TGAGTTT	T	-6	NA
Dmel	2L	394238	A	AA	1	NA
Dmel	2L	402960	CTGATTTTTGC	C	-10	2
Dmel	2L	421525	CCGAAGCA	C	-7	NA
Dmel	2L	560554	A	CACGATTTGCCTAACGATTAT	20	NA
Dmel	2L	564102	GTACAGAGCTC	A	-10	1
Dmel	2L	577045	G	CC	1	NA
Dmel	2L	577051	ATTTTACTTGTC	A	-11	0
Dmel	2L	582021	T	TATAC	4	NA
Dmel	2L	602271	TGAAGAGAT	T	-8	2
Dmel	2L	612728	TT	T	-1	NA
Dmel	2L	612933	G	GACCCC	5	NA
Dmel	2L	612934	TCATGGCAGTCA	T	-11	0
Dmel	2L	614586	ACGGGG	A	-5	NA
Dmel	2L	614593	A	ACCCCGT	6	NA
Dmel	2L	630472	TGT	T	-2	NA
Dmel	2L	634596	CC	C	-1	NA
Dmel	2L	715764	A	AA	1	NA
Dmel	2L	725966	A	AGAGCTGGGTCAGAG	14	NA
Dmel	2L	791500	ACGTTTTGGACACCCAACCGCAGACTACTTCTAGTTATTTTA	A	-41	1
Dmel	2L	795313	TCAATTAGCGTGAAGTTCCCTAAACCCAGTAATTGTGCACAATTACGGATGCACGGCT	T	-57	1
Dmel	2L	805481	C	CACTC	4	NA
Dmel	2L	855318	T	TGT	2	NA
Dmel	2L	890361	TTATGCTTATTCAG	T	-13	0
Dmel	2L	890385	AAATATAATA	A	-9	1
Dmel	2L	891164	TTATTC	G	-5	NA
Dmel	2L	891688	T	TA	1	NA
Dmel	2L	892215	GT	A	-1	NA
Dmel	2L	892376	TCGTTA	T	-5	NA
Dmel	2L	894164	TACAAAAG	T	-7	NA
Dmel	2L	897291	C	CT	1	NA
Dmel	2L	897294	GC	G	-1	NA
Dmel	2L	897297	T	TG	1	NA
Dmel	2L	898407	GA	G	-1	NA
Dmel	2L	902674	C	CC	1	NA
Dmel	2L	904753	A	ACTA	3	NA
Dmel	2L	904771	TAG	C	-2	NA
Dmel	2L	904842	T	TCAGTGCT	7	NA
Dmel	2L	906593	TATTAAAAACCTAGATCCCTTGATAGTTTC	T	-29	0
Dmel	2L	921008	A	AAATA	4	NA
Dmel	2L	922510	AAATATA	A	-6	NA
Dmel	2L	922703	TT	T	-1	NA
Dmel	2L	961810	TGCGTGACTTGG	T	-11	0
Dmel	2L	964081	A	AGACAACA	7	NA
Dmel	2L	965412	TCT	T	-2	NA
Dmel	2L	968988	A	AT	1	NA
Dmel	2L	970528	G	GCATTCCAGTTTTGA	14	NA
Dmel	2L	971961	TGTTCTGT	T	-7	NA
Dmel	2L	971970	GCCATAAATGGTGAGCTAATTTTGTTTGGCAT	G	-31	0
Dmel	2L	992670	AACAGTGGA	A	-8	3
Dmel	2L	992724	T	TT	1	NA
Dmel	2L	994501	ATATATGTACA	A	-10	5
Dmel	2L	995920	ACATA	A	-4	NA
Dmel	2L	996013	ATGTGGGTATA	A	-10	4
Dmel	2L	1005896	TT	T	-1	NA
Dmel	2L	1006993	AG	A	-1	NA
Dmel	2L	1007000	AA	A	-1	NA
Dmel	2L	1048463	AATAATTATATCTATT	A	-15	0
Dmel	2L	1134201	CGGATCATTGTGCGC	C	-14	1
Dmel	2L	1134262	A	ATTGTA	5	NA
Dmel	2L	1134271	A	AC	1	NA
Dmel	2L	1134282	A	GGG	2	NA
Dmel	2L	1134291	TA	GTCACTTGG	7	NA
Dmel	2L	1201228	A	AGTTCATATAA	10	NA
Dmel	2L	1203874	A	CG	1	NA
Dmel	2L	1207702	A	AA	1	NA
Dmel	2L	1210657	TT	T	-1	NA
Dmel	2L	1211890	AC	A	-1	NA
Dmel	2L	1211925	TTTATAAAATATTTT	T	-14	2
Dmel	2L	1211970	T	TTATGATGTA	9	NA
Dmel	2L	1218288	C	CGTC	3	NA
Dmel	2L	1231684	AA	A	-1	NA
Dmel	2L	1238026	TAT	C	-2	NA
Dmel	2L	1238039	TGAGTTTCTAAATTATCTTTTCTAAGCCAT	T	-29	1
Dmel	2L	1238767	A	GTAC	3	NA
Dmel	2L	1244992	AAAAG	A	-4	NA
Dmel	2L	1302597	TGTTCATGGCCT	T	-11	1
Dmel	2L	1303904	A	ACATTG	5	NA
Dmel	2L	1315026	TT	A	-1	NA
Dmel	2L	1315498	C	CTTGCC	5	NA
Dmel	2L	1319968	TCA	T	-2	NA
Dmel	2L	1320016	A	AA	1	NA
Dmel	2L	1322637	G	GCTGGGAAGTTGGAGAG	16	NA
Dmel	2L	1327706	TGA	T	-2	NA
Dmel	2L	1329103	AA	A	-1	NA
Dmel	2L	1331012	TT	A	-1	NA
Dmel	2L	1332875	C	CC	1	NA
Dmel	2L	1334012	TAGTCAACCT	T	-9	2
Dmel	2L	1337558	CCTGTTTGGACACCAC	C	-15	1
Dmel	2L	1347343	T	TTGATTT	6	NA
Dmel	2L	1347362	T	TATACAA	6	NA
Dmel	2L	1357845	TTACAGCAT	T	-8	2
Dmel	2L	1378856	A	ATA	2	NA
Dmel	2L	1428010	T	TA	1	NA
Dmel	2L	1430329	A	ATGTA	4	NA
Dmel	2L	1431168	T	TA	1	NA
Dmel	2L	1435195	ATCCAA	A	-5	NA
Dmel	2L	1439410	G	GAAT	3	NA
Dmel	2L	1442549	TG	T	-1	NA
Dmel	2L	1442553	GATAGG	G	-5	NA
Dmel	2L	1456099	G	GG	1	NA
Dmel	2L	1456307	C	CTTATTCG	7	NA
Dmel	2L	1464200	AACT	A	-3	NA
Dmel	2L	1464207	CACCGAATGCCGCTAAATGTTTTTCAAGGGTTTGGAAGTTTGGCTGCCTTGAAGGCAAAGGAGCAGAC	C	-67	1
Dmel	2L	1464278	TCAGTGTAAAAGTGTCTTTTTGAAGGAGTGGGAATTTCGCCG	T	-41	0
Dmel	2L	1464323	TTATTTATATTTCTTTGCTTTTAATCCCTCTACAAATCTTGTTAAAACTATTAAACCGTTTTGCGTAGT	T	-68	2
Dmel	2L	1469100	AG	A	-1	NA
Dmel	2L	1471270	A	AA	1	NA
Dmel	2L	1472755	TA	T	-1	NA
Dmel	2L	1472764	ATTTTT	A	-5	NA
Dmel	2L	1472834	T	TT	1	NA
Dmel	2L	1474309	TTG	T	-2	NA
Dmel	2L	1474313	TTGTA	T	-4	NA
Dmel	2L	1491832	ATT	A	-2	NA
Dmel	2L	1491875	TGA	CT	-1	NA
Dmel	2L	1505115	TTAAAAAAGATTAATGTAAAAAGTCTGT	T	-27	2
Dmel	2L	1508098	TACATTTCCACATACCTAGAAAAAGGATTAT	T	-30	1
Dmel	2L	1508294	TTGCGCATCGCAGTTTATGTAAATGAGGCTGGACC	T	-34	0
Dmel	2L	1510786	AAAAATATCAGA	T	-11	3
Dmel	2L	1527290	TTGCATTTTATTC	T	-12	0
Dmel	2L	1527307	ACAAATATA	A	-8	2
Dmel	2L	1527371	T	TTG	2	NA
Dmel	2L	1529107	GTAATATAGTGGATTAATCAATCGGTTATACTAA	G	-33	0
Dmel	2L	1529144	CCTCTG	C	-5	NA
Dmel	2L	1532625	CCACT	C	-4	NA
Dmel	2L	1535143	ATGCAACAACGATAAGTTTAAG	A	-21	5
Dmel	2L	1538247	A	TCCACC	5	NA
Dmel	2L	1544453	T	GTG	2	NA
Dmel	2L	1552664	AGA	A	-2	NA
Dmel	2L	1554561	ACA	C	-2	NA
Dmel	2L	1615297	TGGCCAAAAAC	A	-10	0
Dmel	2L	1626479	AATGAA	A	-5	NA
Dmel	2L	1633634	GCCACTCC	A	-7	NA
Dmel	2L	1636011	C	CGAC	3	NA
Dmel	2L	1638612	ACAA	A	-3	NA
Dmel	2L	1648137	AT	A	-1	NA
Dmel	2L	1716137	ACTT	A	-3	NA
Dmel	2L	1716148	CGGCAGTCTGGTTAGCCAAGATGAACTA	C	-27	0
Dmel	2L	1732384	CA	C	-1	NA
Dmel	2L	1786467	A	GCG	2	NA
Dmel	2L	1827866	AA	A	-1	NA
Dmel	2L	1828259	TT	T	-1	NA
Dmel	2L	1830698	T	TT	1	NA
Dmel	2L	1830705	TACCC	GGGT	-1	NA
Dmel	2L	1990955	ATGGGTGGG	A	-8	0
Dmel	2L	1993324	GC	G	-1	NA
Dmel	2L	1996251	G	GGTGG	4	NA
Dmel	2L	2052221	C	CCCAAGCAGC	9	NA
Dmel	2L	2120685	CTACAAGC	C	-7	NA
Dmel	2L	2120946	A	ACATA	4	NA
Dmel	2L	2247949	GC	G	-1	NA
Dmel	2L	2267166	CCC	C	-2	NA
Dmel	2L	2270227	C	CC	1	NA
Dmel	2L	2279740	A	AC	1	NA
Dmel	2L	2280248	T	GTTAAG	5	NA
Dmel	2L	2418288	T	TGAGTTTAGAAAAATA	15	NA
Dmel	2L	2420431	T	TC	1	NA
Dmel	2L	2420440	T	TGACGAAGAGCGCAAGGAAGACAAGGAGAAGCTGTCCAAGCGG	42	NA
Dmel	2L	2420443	A	ACTTAAGAAACTCCTTG	16	NA
Dmel	2L	2420628	TTCT	T	-3	NA
Dmel	2L	2420664	C	CAA	2	NA
Dmel	2L	2463769	TCTCAT	T	-5	NA
Dmel	2L	2466526	A	AATA	3	NA
Dmel	2L	2469922	T	TGTTTGTT	7	NA
Dmel	2L	2469931	T	TAAATTAGTG	9	NA
Dmel	2L	2469951	G	ACAAATA	6	NA
Dmel	2L	2488084	G	GGAAATTATTTTAATATAAATGTGTT	25	NA
Dmel	2L	2501950	TGTC	T	-3	NA
Dmel	2L	2505499	AA	A	-1	NA
Dmel	2L	2506092	AACA	A	-3	NA
Dmel	2L	2506229	T	TT	1	NA
Dmel	2L	2519841	G	TA	1	NA
Dmel	2L	2524573	GTGTTGAGG	G	-8	5
Dmel	2L	2525690	GT	TGAAG	3	NA
Dmel	2L	2544565	AA	A	-1	NA
Dmel	2L	2544836	TAA	T	-2	NA
Dmel	2L	2545890	A	AGTTTTTTA	8	NA
Dmel	2L	2545984	T	TAGTTTTAGTTAGTTAGTTCA	20	NA
Dmel	2L	2546239	A	CACACAATTGTTTCCAT	16	NA
Dmel	2L	2548093	ATCAGTAATCATAACTTAAATACAA	A	-24	3
Dmel	2L	2549935	CAA	C	-2	NA
Dmel	2L	2553349	GG	G	-1	NA
Dmel	2L	2557862	A	ACCTGAAATA	9	NA
Dmel	2L	2557868	GTTTTCTGCTATTAGTTTTCATTGGTAAACTG	A	-31	1
Dmel	2L	2557909	TT	C	-1	NA
Dmel	2L	2561116	G	TT	1	NA
Dmel	2L	2561131	CATAC	C	-4	NA
Dmel	2L	2562258	G	GAG	2	NA
Dmel	2L	2587999	G	GTTG	3	NA
Dmel	2L	2588024	TTGGTTGAAAGTATACAAT	T	-18	1
Dmel	2L	2588099	T	TGTAA	4	NA
Dmel	2L	2588102	TTCATCAT	G	-7	NA
Dmel	2L	2588600	T	GC	1	NA
Dmel	2L	2597062	A	ATTATTTATT	9	NA
Dmel	2L	2597636	T	TTGACATAGGT	10	NA
Dmel	2L	2603239	CTGGCGC	C	-6	NA
Dmel	2L	2619509	GTTTG	G	-4	NA
Dmel	2L	2620793	GTGT	G	-3	NA
Dmel	2L	2633351	CTTAC	C	-4	NA
Dmel	2L	2641336	A	AA	1	NA
Dmel	2L	2673362	A	GATTTGCG	7	NA
Dmel	2L	2677073	T	TT	1	NA
Dmel	2L	2677290	AA	A	-1	NA
Dmel	2L	2720491	GTT	G	-2	NA
Dmel	2L	2724348	GGGAATATAG	G	-9	8
Dmel	2L	2801323	CT	GAG	1	NA
Dmel	2L	2815945	CA	C	-1	NA
Dmel	2L	2815952	C	TAA	2	NA
Dmel	2L	2832091	CGC	C	-2	NA
Dmel	2L	2832105	TATTTT	GG	-4	NA
Dmel	2L	2855787	A	ATGGA	4	NA
Dmel	2L	3016150	GC	G	-1	NA
Dmel	2L	3042305	TGCCTAA	T	-6	NA
Dmel	2L	3145985	CGTTGATGAAAAAT	G	-13	4
Dmel	2L	3213310	TT	T	-1	NA
Dmel	2L	3216731	AA	A	-1	NA
Dmel	2L	3217898	A	AA	1	NA
Dmel	2L	3219394	ATTG	A	-3	NA
Dmel	2L	3220626	TCAAT	T	-4	NA
Dmel	2L	3223533	TTATGGGCA	T	-8	0
Dmel	2L	3228431	CACTCTTT	G	-7	NA
Dmel	2L	3229967	A	ATATATG	6	NA
Dmel	2L	3232212	C	CAACACT	6	NA
Dmel	2L	3240513	TT	AATAA	3	NA
Dmel	2L	3240622	TGCTTACAT	T	-8	1
Dmel	2L	3241767	TCTTACAGGTGCACATAAAGCA	T	-21	0
Dmel	2L	3250105	TC	AGGTAA	4	NA
Dmel	2L	3260934	ACTGTGTACGATA	A	-12	3
Dmel	2L	3268203	AATTTTA	A	-6	NA
Dmel	2L	3273005	AAC	A	-2	NA
Dmel	2L	3273014	TATTATTATTATTTA	T	-14	0
Dmel	2L	3274656	A	ATTAAAACT	8	NA
Dmel	2L	3274845	TGT	T	-2	NA
Dmel	2L	3281558	AGGAATTGG	T	-8	0
Dmel	2L	3286726	GGGGG	G	-4	NA
Dmel	2L	3323305	ACTTGAGTTCTGAGTTACCAGCTTTATCTCTTACCCCGAATCTTGTTGTTTGGCCACGG	TTCTT	-54	NA
Dmel	2L	3327219	GCTTAG	G	-5	NA
Dmel	2L	3355060	AG	A	-1	NA
Dmel	2L	3355681	TATTGTACT	T	-8	1
Dmel	2L	3376861	TCGATTT	T	-6	NA
Dmel	2L	3376872	T	TGGAT	4	NA
Dmel	2L	3376901	GTAA	G	-3	NA
Dmel	2L	3376913	GATTGGCTTAT	A	-10	0
Dmel	2L	3376930	TAATGTGCTTCA	T	-11	0
Dmel	2L	3382510	TTT	T	-2	NA
Dmel	2L	3383463	A	AAA	2	NA
Dmel	2L	3383489	C	ACA	2	NA
Dmel	2L	3384827	T	TT	1	NA
Dmel	2L	3386778	CTAATTAATGTTGTCGCGATTGAGGCTGC	C	-28	1
Dmel	2L	3428839	TAGGAATATAGT	T	-11	1
Dmel	2L	3430808	TAAAC	T	-4	NA
Dmel	2L	3435260	TCTTT	T	-4	NA
Dmel	2L	3438649	TAT	T	-2	NA
Dmel	2L	3440323	CTTGCAATTCGCACAAGAAATGGGTG	C	-25	0
Dmel	2L	3443248	AC	A	-1	NA
Dmel	2L	3444129	ACTGTCACCTAACACTTGGCTAAATCG	A	-26	0
Dmel	2L	3447689	T	TCT	2	NA
Dmel	2L	3447981	AA	A	-1	NA
Dmel	2L	3476139	C	CAAACTC	6	NA
Dmel	2L	3476164	CACAATA	C	-6	NA
Dmel	2L	3477757	A	ACTGAA	5	NA
Dmel	2L	3491326	A	AC	1	NA
Dmel	2L	3530742	A	AGA	2	NA
Dmel	2L	3538972	T	TT	1	NA
Dmel	2L	3560305	G	TTT	2	NA
Dmel	2L	3563509	C	CACCT	4	NA
Dmel	2L	3565000	TTTTGCAAACGCT	T	-12	3
Dmel	2L	3565949	AGCCA	A	-4	NA
Dmel	2L	3570188	G	GT	1	NA
Dmel	2L	3572488	TACGAT	T	-5	NA
Dmel	2L	3575134	A	AAATTGTTGATATT	13	NA
Dmel	2L	3577757	GTGCGTAAATAGTGTAA	G	-16	0
Dmel	2L	3590794	G	GGA	2	NA
Dmel	2L	3593141	ACACCTGCTAA	A	-10	3
Dmel	2L	3596796	AG	C	-1	NA
Dmel	2L	3596799	A	ACT	2	NA
Dmel	2L	3598064	T	TTTCT	4	NA
Dmel	2L	3603675	ACTGACATCAAATTCAATTCGATTCGA	G	-26	1
Dmel	2L	3603704	TCATAAATTAACTTCTGC	T	-17	0
Dmel	2L	3610385	AGGT	A	-3	NA
Dmel	2L	3613718	A	AT	1	NA
Dmel	2L	3614085	GCCAA	T	-4	NA
Dmel	2L	3614149	T	TA	1	NA
Dmel	2L	3614153	GA	G	-1	NA
Dmel	2L	3615789	A	AA	1	NA
Dmel	2L	3615817	CGA	T	-2	NA
Dmel	2L	3618714	TTACATAC	G	-7	NA
Dmel	2L	3618726	A	AA	1	NA
Dmel	2L	3618946	T	TA	1	NA
Dmel	2L	3621941	AG	A	-1	NA
Dmel	2L	3658815	A	AGTAAAGAAAATAGTG	15	NA
Dmel	2L	3696082	C	CAA	2	NA
Dmel	2L	3696085	A	ATA	2	NA
Dmel	2L	3700659	AAA	GT	-1	NA
Dmel	2L	3755941	C	CT	1	NA
Dmel	2L	3756098	AATT	A	-3	NA
Dmel	2L	3823213	A	AATAA	4	NA
Dmel	2L	3827837	A	AA	1	NA
Dmel	2L	3830043	A	AGA	2	NA
Dmel	2L	3831001	T	TGT	2	NA
Dmel	2L	3843202	T	TTTGGAAAATGC	11	NA
Dmel	2L	3843226	A	ATTTTCCTCCAAGATAAATACATTTTTTAA	29	NA
Dmel	2L	3848125	A	AAG	2	NA
Dmel	2L	3862544	ACAGATAATAAATAAAATAACAATATCGATAT	C	-31	0
Dmel	2L	3997302	CATAAAACCCGC	TTG	-9	NA
Dmel	2L	3997601	GGTGATTTCAACTACAATGTTCTCGTGCTGGGGGCC	G	-35	0
Dmel	2L	3998621	A	ATAT	3	NA
Dmel	2L	4002174	GCATA	T	-4	NA
Dmel	2L	4002277	TAAAA	T	-4	NA
Dmel	2L	4009549	AA	A	-1	NA
Dmel	2L	4012215	AA	A	-1	NA
Dmel	2L	4012223	A	ATGCTT	5	NA
Dmel	2L	4013387	C	CTACCCCGC	8	NA
Dmel	2L	4015311	AATA	A	-3	NA
Dmel	2L	4015359	G	TA	1	NA
Dmel	2L	4015437	TAAACGTA	G	-7	NA
Dmel	2L	4019261	A	AA	1	NA
Dmel	2L	4019377	GTTTA	T	-4	NA
Dmel	2L	4026105	AA	A	-1	NA
Dmel	2L	4028610	G	GTGCACATCTAACTAG	15	NA
Dmel	2L	4028636	TTTTATCG	T	-7	NA
Dmel	2L	4028644	A	AGAATA	5	NA
Dmel	2L	4029526	CAAATTTATGGC	C	-11	1
Dmel	2L	4117916	TT	T	-1	NA
Dmel	2L	4121639	CTTGTAA	C	-6	NA
Dmel	2L	4125175	CC	C	-1	NA
Dmel	2L	4134384	CTG	C	-2	NA
Dmel	2L	4147113	A	ATATAC	5	NA
Dmel	2L	4147923	C	CC	1	NA
Dmel	2L	4147988	AATGAATATTTAGCACCATGAA	A	-21	4
Dmel	2L	4155581	TGCTTCCACATAAGTATG	T	-17	2
Dmel	2L	4157974	TTT	T	-2	NA
Dmel	2L	4158703	AAA	A	-2	NA
Dmel	2L	4158712	T	TTTTTTAATTTTTTTTTT	17	NA
Dmel	2L	4162422	C	CAT	2	NA
Dmel	2L	4167513	CG	C	-1	NA
Dmel	2L	4170030	ACTGCGCACA	T	-9	1
Dmel	2L	4198398	TTAT	A	-3	NA
Dmel	2L	4224447	TTGATAAACCGATATATAAGTTAATTT	T	-26	1
Dmel	2L	4224548	CA	C	-1	NA
Dmel	2L	4231036	GCGCCCACTGAAT	A	-12	1
Dmel	2L	4233744	AG	A	-1	NA
Dmel	2L	4236083	G	GGAAT	4	NA
Dmel	2L	4244518	TCCGTGT	T	-6	NA
Dmel	2L	4249777	GTG	G	-2	NA
Dmel	2L	4249787	GGAGAAATGGACAA	G	-13	0
Dmel	2L	4249849	GC	G	-1	NA
Dmel	2L	4250832	AG	A	-1	NA
Dmel	2L	4250874	A	ATGCAGCTTAAGTCGATTAAAATATTGCCCAATTAAATACACACATTTCA	49	NA
Dmel	2L	4265707	TTGGTTATATTTACCGGTTTAGTAT	T	-24	1
Dmel	2L	4265735	AGAGAGTGGCTGCT	A	-13	0
Dmel	2L	4268571	GCTA	G	-3	NA
Dmel	2L	4269305	AT	A	-1	NA
Dmel	2L	4271259	AGT	A	-2	NA
Dmel	2L	4271763	T	TC	1	NA
Dmel	2L	4276645	TA	T	-1	NA
Dmel	2L	4347962	TC	T	-1	NA
Dmel	2L	4356560	T	TTTACTG	6	NA
Dmel	2L	4449036	T	TAAGT	4	NA
Dmel	2L	4616794	CG	T	-1	NA
Dmel	2L	4618062	TTCTGCAT	T	-7	NA
Dmel	2L	4622116	GGTTGCG	G	-6	NA
Dmel	2L	4626776	TT	ACA	1	NA
Dmel	2L	4635499	A	AC	1	NA
Dmel	2L	4656706	TTT	T	-2	NA
Dmel	2L	4673540	GG	G	-1	NA
Dmel	2L	4680765	G	GA	1	NA
Dmel	2L	4681831	AT	TCC	1	NA
Dmel	2L	4682517	T	TGGG	3	NA
Dmel	2L	4682572	A	TT	1	NA
Dmel	2L	4693327	GAGCTTTACAT	G	-10	0
Dmel	2L	4694423	T	TA	1	NA
Dmel	2L	4727077	ATTTA	A	-4	NA
Dmel	2L	4729165	C	CTTTCTGCC	8	NA
Dmel	2L	4806290	ATGTA	A	-4	NA
Dmel	2L	4830728	GGTGTCG	G	-6	NA
Dmel	2L	4841480	TT	T	-1	NA
Dmel	2L	4908181	AAAATATA	A	-7	NA
Dmel	2L	5100631	TTT	T	-2	NA
Dmel	2L	5374018	C	CTCT	3	NA
Dmel	2L	5385052	G	GTGG	3	NA
Dmel	2L	5389752	G	GACTGATGGCGT	11	NA
Dmel	2L	5393778	A	ATCACTA	6	NA
Dmel	2L	5395767	CC	C	-1	NA
Dmel	2L	5398896	TCGATTTCTGGATTGCT	T	-16	2
Dmel	2L	5444787	A	AT	1	NA
Dmel	2L	5444794	T	TATATA	5	NA
Dmel	2L	5444822	G	GGGCATTA	7	NA
Dmel	2L	5444874	T	TTGAAAACA	8	NA
Dmel	2L	5446006	AAA	A	-2	NA
Dmel	2L	5449115	AA	A	-1	NA
Dmel	2L	5452694	CC	C	-1	NA
Dmel	2L	5458256	A	ATA	2	NA
Dmel	2L	5459980	AGTGTAAACCTTTT	A	-13	0
Dmel	2L	5468074	AG	A	-1	NA
Dmel	2L	5469014	T	ACTCC	4	NA
Dmel	2L	5469752	TT	T	-1	NA
Dmel	2L	5476506	AT	A	-1	NA
Dmel	2L	5476899	AGTTTG	A	-5	NA
Dmel	2L	5477805	T	TT	1	NA
Dmel	2L	5478657	A	AGA	2	NA
Dmel	2L	5479134	GA	G	-1	NA
Dmel	2L	5480157	ACTCCTTATTTAGGTAA	A	-16	3
Dmel	2L	5480239	T	TTA	2	NA
Dmel	2L	5483868	GCTCA	G	-4	NA
Dmel	2L	5483875	TC	T	-1	NA
Dmel	2L	5483882	TACTCTTT	A	-7	NA
Dmel	2L	5484025	CC	T	-1	NA
Dmel	2L	5484177	A	AC	1	NA
Dmel	2L	5492808	TGC	A	-2	NA
Dmel	2L	5495162	AG	A	-1	NA
Dmel	2L	5503749	AAT	C	-2	NA
Dmel	2L	5517402	TACTTATATTTA	T	-11	0
Dmel	2L	5542376	TT	T	-1	NA
Dmel	2L	5542386	AA	A	-1	NA
Dmel	2L	5549653	CTTTTATTTAAAA	G	-12	0
Dmel	2L	5564001	GTTTGAG	G	-6	NA
Dmel	2L	5568059	GGGCACG	G	-6	NA
Dmel	2L	5579535	AGGCTTA	A	-6	NA
Dmel	2L	5593236	AAA	A	-2	NA
Dmel	2L	5598741	TTAAAATCGTAGAAGT	T	-15	1
Dmel	2L	5618443	GA	G	-1	NA
Dmel	2L	5697528	TC	T	-1	NA
Dmel	2L	5697557	T	TAT	2	NA
Dmel	2L	5698297	TC	T	-1	NA
Dmel	2L	5705213	A	ACTTG	4	NA
Dmel	2L	5810224	TCTCTTATAGA	G	-10	0
Dmel	2L	5886733	T	TCGTT	4	NA
Dmel	2L	5886734	G	CGCCA	4	NA
Dmel	2L	5888567	AT	A	-1	NA
Dmel	2L	5897006	C	CTGC	3	NA
Dmel	2L	5897012	A	ACTGATTT	7	NA
Dmel	2L	5898893	AAAAGTGTATACTA	A	-13	2
Dmel	2L	5924704	A	AGAATTTTAC	9	NA
Dmel	2L	5943559	TAG	A	-2	NA
Dmel	2L	5949089	TGTCA	T	-4	NA
Dmel	2L	5949096	T	TGTGGATCT	8	NA
Dmel	2L	5957731	ACCGATATGA	A	-9	1
Dmel	2L	5960661	T	TCCA	3	NA
Dmel	2L	5965123	TTATACTT	T	-7	NA
Dmel	2L	6012448	CGC	C	-2	NA
Dmel	2L	6099234	TATTGCACCCAGTACGCTGCATAACGTGGCTTGTCTTCTT	T	-39	1
Dmel	2L	6135374	TCAA	T	-3	NA
Dmel	2L	6135381	GA	G	-1	NA
Dmel	2L	6157205	T	TGTCT	4	NA
Dmel	2L	6159142	TT	T	-1	NA
Dmel	2L	6213956	AT	A	-1	NA
Dmel	2L	6223354	TG	T	-1	NA
Dmel	2L	6224414	A	AACACTAA	7	NA
Dmel	2L	6235306	G	GT	1	NA
Dmel	2L	6236960	GTTAGCCATTTGG	G	-12	4
Dmel	2L	6241382	A	AT	1	NA
Dmel	2L	6474031	A	ACA	2	NA
Dmel	2L	6477111	AAA	A	-2	NA
Dmel	2L	6548554	T	TT	1	NA
Dmel	2L	6548556	T	TCC	2	NA
Dmel	2L	6551618	GGTAGCATGCTTCTC	A	-14	0
Dmel	2L	6551640	TAAGTAA	T	-6	NA
Dmel	2L	6568217	A	AAATGGA	6	NA
Dmel	2L	6603039	A	AT	1	NA
Dmel	2L	6605937	GC	G	-1	NA
Dmel	2L	6606376	TCTGCTGGCCATT	T	-12	4
Dmel	2L	6742224	TTTTTT	T	-5	NA
Dmel	2L	6742250	TG	T	-1	NA
Dmel	2L	6788820	ACT	G	-2	NA
Dmel	2L	6799918	T	CAACATGG	7	NA
Dmel	2L	6807435	T	TA	1	NA
Dmel	2L	6809492	C	CCT	2	NA
Dmel	2L	6812055	GC	ATTATAATT	7	NA
Dmel	2L	6812346	CCTCGAT	C	-6	NA
Dmel	2L	6812355	A	AAGA	3	NA
Dmel	2L	6818163	ACCTCTTATTTTAGGTTTCACTGTAAAGTATC	A	-31	0
Dmel	2L	6819611	T	TA	1	NA
Dmel	2L	6819671	CTCGTTT	AAA	-4	NA
Dmel	2L	6820151	T	CTGGTTTTA	8	NA
Dmel	2L	6839513	TC	T	-1	NA
Dmel	2L	6849291	A	AA	1	NA
Dmel	2L	6972017	TC	T	-1	NA
Dmel	2L	6972075	CGAATTCA	C	-7	NA
Dmel	2L	6972114	GGC	G	-2	NA
Dmel	2L	7087974	CGAT	C	-3	NA
Dmel	2L	7089514	T	TT	1	NA
Dmel	2L	7091347	C	ACGCTCTTT	8	NA
Dmel	2L	7092895	TT	T	-1	NA
Dmel	2L	7169471	T	CAGCGGC	6	NA
Dmel	2L	7170551	A	AT	1	NA
Dmel	2L	7171871	AGTAA	A	-4	NA
Dmel	2L	7171929	TCTTAATTT	T	-8	2
Dmel	2L	7190258	A	AGT	2	NA
Dmel	2L	7250216	T	TT	1	NA
Dmel	2L	7250253	GA	G	-1	NA
Dmel	2L	7253807	T	TTGTATATTAAACAT	14	NA
Dmel	2L	7254748	AA	A	-1	NA
Dmel	2L	7282967	CAACT	C	-4	NA
Dmel	2L	7292361	C	CG	1	NA
Dmel	2L	7295242	A	AGTT	3	NA
Dmel	2L	7295246	TAACTAGCT	T	-8	1
Dmel	2L	7297127	T	CG	1	NA
Dmel	2L	7318974	G	GA	1	NA
Dmel	2L	7322106	TA	T	-1	NA
Dmel	2L	7325779	C	CC	1	NA
Dmel	2L	7330318	AATA	A	-3	NA
Dmel	2L	7355134	A	TATG	3	NA
Dmel	2L	7357473	A	ATATAATAG	8	NA
Dmel	2L	7358239	A	ATTACA	5	NA
Dmel	2L	7362097	ATCTATCT	A	-7	NA
Dmel	2L	7400794	AC	A	-1	NA
Dmel	2L	7430384	T	TTGGAG	5	NA
Dmel	2L	7437389	TTCCG	T	-4	NA
Dmel	2L	7466353	A	AG	1	NA
Dmel	2L	7584842	ATGAAGCACTTTCA	A	-13	2
Dmel	2L	7585108	G	GGGG	3	NA
Dmel	2L	7588606	C	CCC	2	NA
Dmel	2L	7592056	TCGTATTTACT	A	-10	3
Dmel	2L	7623691	CATACA	AG	-4	NA
Dmel	2L	7625213	TTTCTTTAATATTCAGGTG	T	-18	0
Dmel	2L	7631131	TCAC	G	-3	NA
Dmel	2L	7632968	TT	T	-1	NA
Dmel	2L	7749161	AAAAAGAA	A	-7	NA
Dmel	2L	7749200	C	CTT	2	NA
Dmel	2L	7790899	AA	A	-1	NA
Dmel	2L	7838276	T	TACC	3	NA
Dmel	2L	7838279	TT	T	-1	NA
Dmel	2L	8205308	A	ACA	2	NA
Dmel	2L	8240299	AACGA	A	-4	NA
Dmel	2L	8311331	TT	A	-1	NA
Dmel	2L	8333596	GATACAA	T	-6	NA
Dmel	2L	8333720	T	TT	1	NA
Dmel	2L	8335746	CTTGC	C	-4	NA
Dmel	2L	8346255	A	AT	1	NA
Dmel	2L	8351846	G	GG	1	NA
Dmel	2L	8398007	TGCTCTC	T	-6	NA
Dmel	2L	8398053	T	GGG	2	NA
Dmel	2L	8681157	T	TACGCTCAT	8	NA
Dmel	2L	8681251	ATGTTTT	A	-6	NA
Dmel	2L	8742819	ATATTGTGCCTGTCAATATCCAAG	A	-23	0
Dmel	2L	8742996	TAATTTTTTTTTCACCTGCTC	T	-20	0
Dmel	2L	8747104	TT	T	-1	NA
Dmel	2L	8748407	A	AATTTAA	6	NA
Dmel	2L	8755528	TTT	GAAC	1	NA
Dmel	2L	8755985	A	TT	1	NA
Dmel	2L	8759255	AA	A	-1	NA
Dmel	2L	8781453	TGCAT	T	-4	NA
Dmel	2L	8784255	AGTGTTA	A	-6	NA
Dmel	2L	8785098	T	TG	1	NA
Dmel	2L	8787703	AA	A	-1	NA
Dmel	2L	8789588	A	AAA	2	NA
Dmel	2L	8791894	GA	C	-1	NA
Dmel	2L	8792880	T	TGG	2	NA
Dmel	2L	8795939	GG	G	-1	NA
Dmel	2L	8798686	A	AACAAATAGAGCAGTTCA	17	NA
Dmel	2L	8801474	TCAATT	T	-5	NA
Dmel	2L	8802878	T	TTTGTTGACTGTTT	13	NA
Dmel	2L	8805043	T	TGAA	3	NA
Dmel	2L	8808587	ATCTTGA	A	-6	NA
Dmel	2L	8808615	TAC	GT	-1	NA
Dmel	2L	8809372	C	CG	1	NA
Dmel	2L	8809467	C	CC	1	NA
Dmel	2L	8810958	TGGAAAAGGATT	T	-11	1
Dmel	2L	8813147	GG	G	-1	NA
Dmel	2L	8815916	TGTTGTATTTACCCACTAATAAAGTAT	T	-26	1
Dmel	2L	8820337	A	AACTTA	5	NA
Dmel	2L	8822970	G	GAAGT	4	NA
Dmel	2L	8834933	TG	CAA	1	NA
Dmel	2L	8835318	CG	C	-1	NA
Dmel	2L	8837381	CTA	C	-2	NA
Dmel	2L	8838776	ATT	A	-2	NA
Dmel	2L	8838788	A	AA	1	NA
Dmel	2L	8838812	CGC	T	-2	NA
Dmel	2L	8838854	TCACCCT	T	-6	NA
Dmel	2L	8838877	GC	G	-1	NA
Dmel	2L	8841199	G	GGTGTTC	6	NA
Dmel	2L	8847310	A	AAGAT	4	NA
Dmel	2L	8872035	CGGATC	C	-5	NA
Dmel	2L	8872214	T	TTC	2	NA
Dmel	2L	8872216	T	TTA	2	NA
Dmel	2L	8874364	G	GAGG	3	NA
Dmel	2L	8875917	CA	TCGC	2	NA
Dmel	2L	8879809	CACGG	TCT	-2	NA
Dmel	2L	8880103	GTCTAAGACTG	G	-10	1
Dmel	2L	8880123	TTCTGACTTTTAATA	T	-14	3
Dmel	2L	8885281	AATCACCCGAAGTGTTCCATC	A	-20	0
Dmel	2L	8888880	CCCTCAAAATCCTTATAAAGG	C	-20	0
Dmel	2L	8888944	CAT	C	-2	NA
Dmel	2L	8889235	G	GAAATGTACTTTATGT	15	NA
Dmel	2L	8891120	GTGC	G	-3	NA
Dmel	2L	8891129	TC	T	-1	NA
Dmel	2L	8896202	C	CTTATTTGACA	10	NA
Dmel	2L	8975777	TCT	T	-2	NA
Dmel	2L	8977451	TAAATAGAT	T	-8	2
Dmel	2L	8985110	A	AA	1	NA
Dmel	2L	8991337	T	TTTGA	4	NA
Dmel	2L	8991343	T	TCCCGGCTAATCCGGT	15	NA
Dmel	2L	9015475	C	CGTC	3	NA
Dmel	2L	9016270	GACCCTTCTATG	G	-11	1
Dmel	2L	9018779	A	ATACGCCCCGCTCACCCA	17	NA
Dmel	2L	9032413	ACCAAGCCAGTTCACGG	A	-16	0
Dmel	2L	9032860	AA	A	-1	NA
Dmel	2L	9033489	AC	A	-1	NA
Dmel	2L	9040188	ACA	T	-2	NA
Dmel	2L	9040193	TATGG	T	-4	NA
Dmel	2L	9042627	TG	T	-1	NA
Dmel	2L	9044787	TT	T	-1	NA
Dmel	2L	9044809	AA	A	-1	NA
Dmel	2L	9078462	A	AA	1	NA
Dmel	2L	9079694	A	ATA	2	NA
Dmel	2L	9080366	TTGTTGTATG	AC	-8	NA
Dmel	2L	9081915	A	ACATTA	5	NA
Dmel	2L	9090299	GT	A	-1	NA
Dmel	2L	9106282	C	CTGGTATATTT	10	NA
Dmel	2L	9106283	CACAG	C	-4	NA
Dmel	2L	9106885	TT	T	-1	NA
Dmel	2L	9113976	TTTTTATATAAC	T	-11	0
Dmel	2L	9117472	TC	GAT	1	NA
Dmel	2L	9166693	AT	A	-1	NA
Dmel	2L	9305316	AACG	A	-3	NA
Dmel	2L	9307377	A	ACTTAA	5	NA
Dmel	2L	9309032	AA	A	-1	NA
Dmel	2L	9309320	GAGG	G	-3	NA
Dmel	2L	9310746	AGTCATCG	A	-7	NA
Dmel	2L	9314524	TAAG	A	-3	NA
Dmel	2L	9317520	AAACCTAGT	A	-8	0
Dmel	2L	9317531	TATATAGGGG	T	-9	0
Dmel	2L	9317542	CT	C	-1	NA
Dmel	2L	9322867	TAAATATTGTCTTAAGTTGATTT	A	-22	1
Dmel	2L	9342308	T	TGCTATCCTGA	10	NA
Dmel	2L	9344837	T	CGACC	4	NA
Dmel	2L	9346891	A	AC	1	NA
Dmel	2L	9348146	CC	C	-1	NA
Dmel	2L	9348331	TT	T	-1	NA
Dmel	2L	9351028	TTTCAGTAT	T	-8	3
Dmel	2L	9352225	TCA	T	-2	NA
Dmel	2L	9353318	AAACGCATCTGTGCGGCA	A	-17	3
Dmel	2L	9359355	C	CA	1	NA
Dmel	2L	9360561	TAGT	T	-3	NA
Dmel	2L	9366009	TAATTAAT	G	-7	NA
Dmel	2L	9467303	G	GG	1	NA
Dmel	2L	9468327	T	TGTAT	4	NA
Dmel	2L	9472531	T	TTTTTATTC	8	NA
Dmel	2L	9489738	C	AT	1	NA
Dmel	2L	9542486	T	TGTATT	5	NA
Dmel	2L	9543674	TT	T	-1	NA
Dmel	2L	9543809	AAGTGAAGAAAAACCACATTATGA	A	-23	1
Dmel	2L	9586133	T	TTTAATATA	8	NA
Dmel	2L	9586138	T	TG	1	NA
Dmel	2L	9595089	A	AATA	3	NA
Dmel	2L	9595325	AGGCGA	T	-5	NA
Dmel	2L	9596760	G	GG	1	NA
Dmel	2L	9606479	GCG	G	-2	NA
Dmel	2L	9607697	A	ATGTA	4	NA
Dmel	2L	9626998	C	CAGAAAGT	7	NA
Dmel	2L	9630804	G	GAGCGGGAAAGTCCG	14	NA
Dmel	2L	9632969	TTGCTAGCACT	T	-10	2
Dmel	2L	9662018	TG	T	-1	NA
Dmel	2L	9673711	G	GGA	2	NA
Dmel	2L	9679532	A	CCT	2	NA
Dmel	2L	9775914	C	AAAG	3	NA
Dmel	2L	9790766	CT	ACCGAATA	6	NA
Dmel	2L	9886972	T	AA	1	NA
Dmel	2L	9933383	ATTA	A	-3	NA
Dmel	2L	9947827	TGAAGTGGTAATCCA	T	-14	0
Dmel	2L	9969453	CA	C	-1	NA
Dmel	2L	9969458	GC	G	-1	NA
Dmel	2L	9973235	TC	T	-1	NA
Dmel	2L	10018770	A	AAATTGTT	7	NA
Dmel	2L	10018788	A	AT	1	NA
Dmel	2L	10018794	TG	AAAA	2	NA
Dmel	2L	10020675	T	TGGCTTTATT	9	NA
Dmel	2L	10020676	ACTGCAAAT	A	-8	0
Dmel	2L	10026657	TTGCGTCGACT	T	-10	1
Dmel	2L	10038972	G	TT	1	NA
Dmel	2L	10039447	GGGGGAAAGGATGA	G	-13	0
Dmel	2L	10043922	C	CTACCATTC	8	NA
Dmel	2L	10044375	G	AAC	2	NA
Dmel	2L	10044419	C	CAGCGGAAAAAA	11	NA
Dmel	2L	10056581	ACA	T	-2	NA
Dmel	2L	10180668	AT	A	-1	NA
Dmel	2L	10181779	T	TTTCAGTGAATGT	12	NA
Dmel	2L	10227297	G	GTGCGAAATGC	10	NA
Dmel	2L	10227544	AA	A	-1	NA
Dmel	2L	10314512	AGATAAA	A	-6	NA
Dmel	2L	10462903	A	AAGCTTA	6	NA
Dmel	2L	10474561	T	ATAAATA	6	NA
Dmel	2L	10519528	CCTGTGAGCCTTC	C	-12	3
Dmel	2L	10524776	AGTGC	A	-4	NA
Dmel	2L	10540209	AA	A	-1	NA
Dmel	2L	10544365	A	ACAATA	5	NA
Dmel	2L	10544367	AT	G	-1	NA
Dmel	2L	10544407	TACGATAGAAAAT	T	-12	1
Dmel	2L	10691359	TGC	T	-2	NA
Dmel	2L	10692368	GA	G	-1	NA
Dmel	2L	10692811	G	GCGGTCG	6	NA
Dmel	2L	10698616	GCTCATTAAAATATACAGAGTATTCTTGGCATCGCAATA	G	-38	0
Dmel	2L	10698703	TCA	T	-2	NA
Dmel	2L	10710782	TT	T	-1	NA
Dmel	2L	10715393	T	TCAGAATCAAAAT	12	NA
Dmel	2L	10716724	TTTTACCA	T	-7	NA
Dmel	2L	10717982	G	TTT	2	NA
Dmel	2L	10728845	A	AA	1	NA
Dmel	2L	10770078	G	GTAC	3	NA
Dmel	2L	10803132	TTCTG	AGA	-2	NA
Dmel	2L	10803249	TT	T	-1	NA
Dmel	2L	10856727	TAAGT	T	-4	NA
Dmel	2L	10872410	ATGTA	A	-4	NA
Dmel	2L	10872440	A	ATGAGTA	6	NA
Dmel	2L	10875143	CTGAACCACAC	C	-10	1
Dmel	2L	10889084	TT	T	-1	NA
Dmel	2L	10893758	TTAGATACATT	T	-10	3
Dmel	2L	10901992	C	CCATCTAAGCATAATTTCATGTGTCT	25	NA
Dmel	2L	11004336	GAAAGTGGA	T	-8	0
Dmel	2L	11011225	TAGTTG	T	-5	NA
Dmel	2L	11207338	C	CT	1	NA
Dmel	2L	11207405	A	AT	1	NA
Dmel	2L	11282053	AA	A	-1	NA
Dmel	2L	11288113	G	AT	1	NA
Dmel	2L	11288162	AATA	A	-3	NA
Dmel	2L	11288236	GG	A	-1	NA
Dmel	2L	11288242	TGTACATTTTTTCT	T	-13	2
Dmel	2L	11292512	A	AGC	2	NA
Dmel	2L	11292520	T	AGA	2	NA
Dmel	2L	11292530	C	TTA	2	NA
Dmel	2L	11292539	T	TA	1	NA
Dmel	2L	11292547	T	TAGTCTGT	7	NA
Dmel	2L	11292578	G	GGGTCTTTGG	9	NA
Dmel	2L	11292978	T	CATAA	4	NA
Dmel	2L	11293944	ACATA	A	-4	NA
Dmel	2L	11296939	CC	T	-1	NA
Dmel	2L	11300283	TAGG	A	-3	NA
Dmel	2L	11300329	TATT	T	-3	NA
Dmel	2L	11300344	TG	C	-1	NA
Dmel	2L	11300570	C	AT	1	NA
Dmel	2L	11302147	TATAAG	GT	-4	NA
Dmel	2L	11306877	GA	G	-1	NA
Dmel	2L	11307108	TC	A	-1	NA
Dmel	2L	11307147	CCATTTAGGCAAGGAATTATC	C	-20	1
Dmel	2L	11307358	T	TACTATATATTATTAA	15	NA
Dmel	2L	11307367	ACCA	TTT	-1	NA
Dmel	2L	11307489	ATGTGGTGA	A	-8	1
Dmel	2L	11311256	C	CTG	2	NA
Dmel	2L	11311341	TCGC	T	-3	NA
Dmel	2L	11318162	A	ACATA	4	NA
Dmel	2L	11319333	TTTGT	T	-4	NA
Dmel	2L	11320085	TACAAT	G	-5	NA
Dmel	2L	11323280	CTC	C	-2	NA
Dmel	2L	11323348	AA	A	-1	NA
Dmel	2L	11331283	AAGTTCTGA	A	-8	3
Dmel	2L	11374217	AC	A	-1	NA
Dmel	2L	11380135	T	AAGC	3	NA
Dmel	2L	11383460	TGGCTGACTATTATTT	T	-15	1
Dmel	2L	11383490	G	GCA	2	NA
Dmel	2L	11383616	GC	G	-1	NA
Dmel	2L	11383652	TAC	T	-2	NA
Dmel	2L	11383657	ACAATCTGTTTAC	A	-12	0
Dmel	2L	11383809	A	AA	1	NA
Dmel	2L	11395112	AT	A	-1	NA
Dmel	2L	11399673	T	TAATAAT	6	NA
Dmel	2L	11400569	T	TTTCAATTCAC	10	NA
Dmel	2L	11400592	T	TGTATATA	7	NA
Dmel	2L	11400607	A	AGT	2	NA
Dmel	2L	11408022	GGGC	G	-3	NA
Dmel	2L	11410637	C	CC	1	NA
Dmel	2L	11410638	A	AA	1	NA
Dmel	2L	11410832	A	AGC	2	NA
Dmel	2L	11410842	G	GGC	2	NA
Dmel	2L	11410846	GCC	AAAAA	2	NA
Dmel	2L	11410851	AG	A	-1	NA
Dmel	2L	11420511	AT	A	-1	NA
Dmel	2L	11425559	ACTACTATACTATCATAT	A	-17	0
Dmel	2L	11426136	TAT	A	-2	NA
Dmel	2L	11426152	TT	T	-1	NA
Dmel	2L	11426343	A	AATTTGCTACTA	11	NA
Dmel	2L	11426399	TT	T	-1	NA
Dmel	2L	11429096	AAAAA	TG	-3	NA
Dmel	2L	11430833	T	TTATATTT	7	NA
Dmel	2L	11451414	TTT	T	-2	NA
Dmel	2L	11461158	T	TT	1	NA
Dmel	2L	11466805	A	ATTTGATTTG	9	NA
Dmel	2L	11467601	CAGGTAC	C	-6	NA
Dmel	2L	11470195	T	TTAACA	5	NA
Dmel	2L	11470196	A	TAACAT	5	NA
Dmel	2L	11476308	G	GATATGTGTTAG	11	NA
Dmel	2L	11477534	AAA	A	-2	NA
Dmel	2L	11478174	T	TAC	2	NA
Dmel	2L	11479943	T	TT	1	NA
Dmel	2L	11496040	TATT	A	-3	NA
Dmel	2L	11496689	GCAGGTAACTATACCGCATCAGGTA	G	-24	0
Dmel	2L	11501465	TT	T	-1	NA
Dmel	2L	11501468	TTTA	AG	-2	NA
Dmel	2L	11501495	A	AA	1	NA
Dmel	2L	11501499	G	GAATATATTCGGATA	14	NA
Dmel	2L	11539344	AATAGCTTACC	A	-10	0
Dmel	2L	11555553	T	TT	1	NA
Dmel	2L	11579721	T	TC	1	NA
Dmel	2L	11631913	TTTTGACTCCA	C	-10	0
Dmel	2L	11631926	AATTTT	A	-5	NA
Dmel	2L	11642064	AT	A	-1	NA
Dmel	2L	11658686	ACTCGCAACTGATGTTGCTG	A	-19	2
Dmel	2L	11661671	A	AAA	2	NA
Dmel	2L	11664815	A	AGAACTTT	7	NA
Dmel	2L	11664817	AAGGGAGAGGT	A	-10	1
Dmel	2L	11678189	T	TGTTATTCTTATT	12	NA
Dmel	2L	11704687	GGAACATAAGCTTGATTCGGCAAG	G	-23	3
Dmel	2L	11762266	GC	G	-1	NA
Dmel	2L	11762901	A	ACAATTACAGTATACTAAAAA	20	NA
Dmel	2L	11768200	T	TTTA	3	NA
Dmel	2L	11785769	ATA	T	-2	NA
Dmel	2L	11814074	GG	G	-1	NA
Dmel	2L	11929282	TGGCATGAAGG	T	-10	0
Dmel	2L	11932083	AT	A	-1	NA
Dmel	2L	11933714	A	AT	1	NA
Dmel	2L	11933795	TTTTAGAGT	T	-8	2
Dmel	2L	11942189	ATTA	A	-3	NA
Dmel	2L	11942607	TTA	AATGGG	3	NA
Dmel	2L	11942640	A	AAGCTGTAAACTCTTAGGATTGAA	23	NA
Dmel	2L	11942688	T	AA	1	NA
Dmel	2L	11942935	C	CT	1	NA
Dmel	2L	11943323	A	GTTTTGGTCGGTTGTAG	16	NA
Dmel	2L	11943438	CATTGC	C	-5	NA
Dmel	2L	11947676	ACTTTAGCGC	A	-9	2
Dmel	2L	11947689	AGC	A	-2	NA
Dmel	2L	11951235	TTGTACA	T	-6	NA
Dmel	2L	12021120	AATCGTCT	A	-7	NA
Dmel	2L	12021129	T	TAA	2	NA
Dmel	2L	12021157	C	CTGGAAA	6	NA
Dmel	2L	12027075	TTA	T	-2	NA
Dmel	2L	12074676	T	TC	1	NA
Dmel	2L	12074686	AAT	A	-2	NA
Dmel	2L	12074697	AATCTACTTGTATGCATATTTCGCGTTTAC	A	-29	0
Dmel	2L	12078888	A	ATTCCAA	6	NA
Dmel	2L	12082736	CGGGAGTTT	C	-8	0
Dmel	2L	12113821	A	ATTAAT	5	NA
Dmel	2L	12113842	T	TGAT	3	NA
Dmel	2L	12113851	T	TTGTAAGTTTTGTTT	14	NA
Dmel	2L	12133899	A	AA	1	NA
Dmel	2L	12133918	CATTGTGTC	C	-8	9
Dmel	2L	12316193	T	CTCTGCTGACGTTAGA	15	NA
Dmel	2L	12316196	T	TCGTA	4	NA
Dmel	2L	12322230	T	TTGTGCCCTACGAT	13	NA
Dmel	2L	12333407	A	GTGAT	4	NA
Dmel	2L	12333726	G	GTGTAATGTCCTTGAGCTGCAAAGTGCTTGAGCTGCAAAGTGCATGCTCAGCATTCCCACGCTCCGCGATCGGCTTATGTATAAGCGTTAGATCGTATTACTGGGGCGCTGGAGTGCTTACGTATTTTTGGTGGTCTTTTTGTATATTTGTATATTTATATTTATTATGACAAAGTGTCACAATGTATTGACGCTATGTTATACCCAATCATTTATTGTATTTTTAGGGTAGATTAGTCCAATATGCTACACATG	254	NA
Dmel	2L	12340579	A	ATG	2	NA
Dmel	2L	12340581	AACC	A	-3	NA
Dmel	2L	12340592	T	TTCTC	4	NA
Dmel	2L	12340595	G	GGCTA	4	NA
Dmel	2L	12397563	C	TAT	2	NA
Dmel	2L	12423684	T	TGTGGATAATTCCAT	14	NA
Dmel	2L	12423889	A	ATGAA	4	NA
Dmel	2L	12549161	TCC	T	-2	NA
Dmel	2L	12566040	C	CATGACGCATTT	11	NA
Dmel	2L	12567618	T	TA	1	NA
Dmel	2L	12567624	AT	A	-1	NA
Dmel	2L	12570027	A	ATCCT	4	NA
Dmel	2L	12746727	C	CACTAAGTAACAAAAACAAACTTTG	24	NA
Dmel	2L	12746788	T	TTACGTAACAATAGTATATTAACTATCAACT	30	NA
Dmel	2L	12754764	CCCGCTTCGCT	C	-10	5
Dmel	2L	12765692	G	GCGTGTG	6	NA
Dmel	2L	12767018	TGATAATCAACGG	T	-12	0
Dmel	2L	12767590	ACAATA	G	-5	NA
Dmel	2L	12770137	A	ACATG	4	NA
Dmel	2L	12775219	TG	T	-1	NA
Dmel	2L	12776079	TT	T	-1	NA
Dmel	2L	12776246	A	TT	1	NA
Dmel	2L	12777288	TTTGTTTTGTTGGT	T	-13	1
Dmel	2L	12801371	GCTGCCATCAG	G	-10	1
Dmel	2L	12804498	TT	T	-1	NA
Dmel	2L	12807485	TTAA	T	-3	NA
Dmel	2L	12827520	T	TTGTTG	5	NA
Dmel	2L	12827531	AA	A	-1	NA
Dmel	2L	12836690	A	AAATAAA	6	NA
Dmel	2L	12842027	TT	T	-1	NA
Dmel	2L	12842181	C	CCT	2	NA
Dmel	2L	12846414	TTTCTT	T	-5	NA
Dmel	2L	12846434	T	TA	1	NA
Dmel	2L	12846444	CTGTT	C	-4	NA
Dmel	2L	12847769	C	CGGCCAC	6	NA
Dmel	2L	12848482	ATATTGCTCGACTCACATGCTGACTCTCAGTGTTGG	A	-35	0
Dmel	2L	12849636	A	AAACTGATTATAAAGTG	16	NA
Dmel	2L	12858382	A	ACGAAG	5	NA
Dmel	2L	12866005	CT	C	-1	NA
Dmel	2L	12875632	GA	G	-1	NA
Dmel	2L	12876474	ATTGTA	A	-5	NA
Dmel	2L	12881066	AT	A	-1	NA
Dmel	2L	12893667	G	AA	1	NA
Dmel	2L	12901079	CGGT	C	-3	NA
Dmel	2L	12901084	ACGG	A	-3	NA
Dmel	2L	12903409	GAG	G	-2	NA
Dmel	2L	12904181	T	TGTGCCTAGAAGC	12	NA
Dmel	2L	12907015	T	TTA	2	NA
Dmel	2L	12907102	AAAGGTAATCTTA	A	-12	2
Dmel	2L	12911350	TT	T	-1	NA
Dmel	2L	12912461	A	AAATGTAA	7	NA
Dmel	2L	12930518	A	AG	1	NA
Dmel	2L	12930681	TTCCTTGTG	A	-8	1
Dmel	2L	12943633	C	CCGTTCGTA	8	NA
Dmel	2L	12946744	CAA	C	-2	NA
Dmel	2L	12963846	CATTCCCCTTTGCGACGTGATTACATAAATCCCAAGCAAAAAAGAAGTAC	T	-49	1
Dmel	2L	12970388	AGAA	A	-3	NA
Dmel	2L	12987354	TA	T	-1	NA
Dmel	2L	12987647	T	TAA	2	NA
Dmel	2L	13061015	TT	T	-1	NA
Dmel	2L	13062935	AAAATGA	A	-6	NA
Dmel	2L	13068652	AGGCTA	A	-5	NA
Dmel	2L	13091273	TATTTTCGAATT	T	-11	1
Dmel	2L	13093891	TTTATA	T	-5	NA
Dmel	2L	13093899	TAA	T	-2	NA
Dmel	2L	13093919	TCTGTTAAGGATTAAATTT	T	-18	4
Dmel	2L	13100354	TACTTTTT	T	-7	NA
Dmel	2L	13100398	ACTTA	A	-4	NA
Dmel	2L	13110792	T	TTA	2	NA
Dmel	2L	13115882	GG	G	-1	NA
Dmel	2L	13124525	CTGTCTGC	C	-7	NA
Dmel	2L	13124640	TAT	T	-2	NA
Dmel	2L	13129485	TT	T	-1	NA
Dmel	2L	13129510	TT	T	-1	NA
Dmel	2L	13147996	TGGCTTTTAACTAACTCATATCCAGTCTCT	T	-29	2
Dmel	2L	13154278	T	TATAT	4	NA
Dmel	2L	13235520	CTACT	G	-4	NA
Dmel	2L	13235787	G	AGTGTGTAGA	9	NA
Dmel	2L	13333069	TT	T	-1	NA
Dmel	2L	13340884	ATGGT	C	-4	NA
Dmel	2L	13359884	A	AC	1	NA
Dmel	2L	13672978	G	GG	1	NA
Dmel	2L	13718412	GGA	T	-2	NA
Dmel	2L	13740115	TTCGTA	T	-5	NA
Dmel	2L	13740122	GAATAAAATTATCTCAGATAGCA	G	-22	0
Dmel	2L	13744443	A	ATAA	3	NA
Dmel	2L	13744448	C	CTATATACTATTATATTT	17	NA
Dmel	2L	13905407	T	TT	1	NA
Dmel	2L	13979783	C	CC	1	NA
Dmel	2L	14011269	C	CC	1	NA
Dmel	2L	14039694	TG	T	-1	NA
Dmel	2L	14096203	CTC	C	-2	NA
Dmel	2L	14096216	A	AATAGCTTC	8	NA
Dmel	2L	14096231	G	GATTTTCAGATTGAA	14	NA
Dmel	2L	14096238	G	GAATTATTGTTAAGCTT	16	NA
Dmel	2L	14102874	A	AG	1	NA
Dmel	2L	14114625	CTC	C	-2	NA
Dmel	2L	14127398	T	TATTTTTTTG	9	NA
Dmel	2L	14129681	TAAAC	T	-4	NA
Dmel	2L	14130967	A	AATCAATAGATAGTTTTGAA	19	NA
Dmel	2L	14132931	GAA	T	-2	NA
Dmel	2L	14182232	AA	A	-1	NA
Dmel	2L	14240236	CC	C	-1	NA
Dmel	2L	14244051	A	ACGTA	4	NA
Dmel	2L	14247558	TTGTTAACCTTCA	T	-12	0
Dmel	2L	14252767	TT	T	-1	NA
Dmel	2L	14253598	C	TTTA	3	NA
Dmel	2L	14347129	CT	C	-1	NA
Dmel	2L	14359108	TG	T	-1	NA
Dmel	2L	14381471	TACATTT	T	-6	NA
Dmel	2L	14388675	CGGTC	T	-4	NA
Dmel	2L	14410185	C	TTTCACTTAGATT	12	NA
Dmel	2L	14420162	C	CCAGGTAATGC	10	NA
Dmel	2L	14432029	T	AC	1	NA
Dmel	2L	14433833	ACAA	A	-3	NA
Dmel	2L	14449134	GCCTGGG	G	-6	NA
Dmel	2L	14454945	AA	A	-1	NA
Dmel	2L	14469401	T	TGCCT	4	NA
Dmel	2L	14470034	A	AG	1	NA
Dmel	2L	14471300	T	TCTACAT	6	NA
Dmel	2L	14472093	GTTTGGGTCT	G	-9	1
Dmel	2L	14472111	ATAAAGGAAGA	A	-10	1
Dmel	2L	14478493	CC	T	-1	NA
Dmel	2L	14498327	T	TT	1	NA
Dmel	2L	14518242	AT	A	-1	NA
Dmel	2L	14518903	GAATTCCCAG	G	-9	4
Dmel	2L	14522422	CGCTGTGCGTTTTCAG	C	-15	0
Dmel	2L	14523237	ATATCATAT	G	-8	0
Dmel	2L	14530488	G	GCGTCGT	6	NA
Dmel	2L	14531158	AGGGA	A	-4	NA
Dmel	2L	14544284	AA	G	-1	NA
Dmel	2L	14552291	ATGTGTATTTA	C	-10	6
Dmel	2L	14578704	TT	T	-1	NA
Dmel	2L	14588315	CCACAGTATGATC	C	-12	2
Dmel	2L	14588940	A	ATTTG	4	NA
Dmel	2L	14589194	ACTT	A	-3	NA
Dmel	2L	14589239	A	TC	1	NA
Dmel	2L	14589243	T	TTCATCCTGTGCT	12	NA
Dmel	2L	14597595	CGGGAC	C	-5	NA
Dmel	2L	14710139	T	AAATGGCCCCGCACAAACATTCATCAAG	27	NA
Dmel	2L	14713381	G	AAAGTTTCATTTCGGAAAGTAATCGTA	26	NA
Dmel	2L	14713447	GGCAGAT	G	-6	NA
Dmel	2L	14716656	ACAAAGCGGCACCAGTGACATGCTCA	A	-25	1
Dmel	2L	14734177	TT	T	-1	NA
Dmel	2L	14745743	C	CTGTATACTGTATGTA	15	NA
Dmel	2L	14747690	GGATGACGG	G	-8	2
Dmel	2L	14747736	AAAACATTTA	A	-9	11
Dmel	2L	14747803	TGTGTACCCATTTGATTAGAAACATCTTTTTGTTGCCAA	T	-38	0
Dmel	2L	14748955	TT	G	-1	NA
Dmel	2L	14751856	A	AGCATGCACA	9	NA
Dmel	2L	14751888	A	AG	1	NA
Dmel	2L	14751894	AGCCACATAAA	A	-10	2
Dmel	2L	14753250	ACTA	A	-3	NA
Dmel	2L	14753265	GTTTTCTGA	G	-8	0
Dmel	2L	14754451	GTGCTGACAAATTCAA	G	-15	0
Dmel	2L	14760653	T	TATA	3	NA
Dmel	2L	14760703	T	TGAA	3	NA
Dmel	2L	14761944	TGG	T	-2	NA
Dmel	2L	14764837	TC	T	-1	NA
Dmel	2L	14771778	T	TT	1	NA
Dmel	2L	14772272	GGCACGACT	C	-8	0
Dmel	2L	14772334	TA	T	-1	NA
Dmel	2L	14772379	G	TT	1	NA
Dmel	2L	14772404	A	ATTATA	5	NA
Dmel	2L	14772415	AACGTCCCA	A	-8	2
Dmel	2L	14778294	A	AT	1	NA
Dmel	2L	14780119	A	ATG	2	NA
Dmel	2L	14791078	GC	G	-1	NA
Dmel	2L	14792929	T	TGTAT	4	NA
Dmel	2L	14815650	C	CC	1	NA
Dmel	2L	14832403	C	TTTTCGTGAACG	11	NA
Dmel	2L	14878477	ATGAGCTGT	A	-8	0
Dmel	2L	14897969	A	ATGGCCA	6	NA
Dmel	2L	14902009	TTTAAGGAAAATATT	T	-14	2
Dmel	2L	14905392	C	CCCCAGCGCCAACCAAAC	17	NA
Dmel	2L	14906128	C	CCCC	3	NA
Dmel	2L	15105400	TC	T	-1	NA
Dmel	2L	15122587	AACCGGGCGCACA	A	-12	2
Dmel	2L	15122653	TACATATACTAACAGATTCTGGGGG	T	-24	2
Dmel	2L	15132213	TGTT	T	-3	NA
Dmel	2L	15134986	GGTTGATGA	CATTAC	-3	NA
Dmel	2L	15139041	AAGTAGAATAAAGTGTC	A	-16	0
Dmel	2L	15139064	TTACGAAAA	C	-8	0
Dmel	2L	15144538	TG	AAT	1	NA
Dmel	2L	15159242	AAT	A	-2	NA
Dmel	2L	15159247	AGTGGAGGTGTACATT	A	-15	0
Dmel	2L	15159267	AAAATA	CC	-4	NA
Dmel	2L	15159306	A	AAA	2	NA
Dmel	2L	15159326	C	TCGATCAATGCTGTAATATGAAT	22	NA
Dmel	2L	15160348	GTTAAAAAAT	G	-9	1
Dmel	2L	15210977	AA	A	-1	NA
Dmel	2L	15221091	G	GTATATCGTA	9	NA
Dmel	2L	15226416	CAGTTTTC	C	-7	NA
Dmel	2L	15299401	GGG	G	-2	NA
Dmel	2L	15299428	A	AACTATA	6	NA
Dmel	2L	15302192	AGTCGGTGAAGATA	A	-13	1
Dmel	2L	15321557	CT	C	-1	NA
Dmel	2L	15321586	A	ATA	2	NA
Dmel	2L	15325010	A	ACCCTGCATGTACATA	15	NA
Dmel	2L	15325768	A	AT	1	NA
Dmel	2L	15336679	CC	C	-1	NA
Dmel	2L	15336763	ATGTA	A	-4	NA
Dmel	2L	15339765	GTTTG	G	-4	NA
Dmel	2L	15354855	ACATA	A	-4	NA
Dmel	2L	15360215	CA	G	-1	NA
Dmel	2L	15360228	TAA	T	-2	NA
Dmel	2L	15360253	TA	T	-1	NA
Dmel	2L	15371853	TGAAG	T	-4	NA
Dmel	2L	15392517	CACTTTA	T	-6	NA
Dmel	2L	15399100	ACG	A	-2	NA
Dmel	2L	15399129	CTTAGCCTGGTTA	T	-12	0
Dmel	2L	15399204	TT	T	-1	NA
Dmel	2L	15399231	TAA	T	-2	NA
Dmel	2L	15403291	AATTTAGGGATGTAATTCCTTTTTAA	A	-25	1
Dmel	2L	15405366	TT	T	-1	NA
Dmel	2L	15420183	TT	T	-1	NA
Dmel	2L	15420225	TTGTCCGGCTTTCG	T	-13	0
Dmel	2L	15431766	ATGGCCA	A	-6	NA
Dmel	2L	15458112	A	AA	1	NA
Dmel	2L	15458187	GAA	T	-2	NA
Dmel	2L	15458193	TTC	T	-2	NA
Dmel	2L	15464441	T	TA	1	NA
Dmel	2L	15467024	AA	A	-1	NA
Dmel	2L	15506501	TAAT	T	-3	NA
Dmel	2L	15509883	TT	T	-1	NA
Dmel	2L	15527413	A	ACGTAGGAAA	9	NA
Dmel	2L	15626414	TGGGCGAGGGGCGGTGGGCTTGTTGGT	T	-26	2
Dmel	2L	15800282	ATTTAAGACACAAGA	C	-14	1
Dmel	2L	15837669	AT	A	-1	NA
Dmel	2L	15863689	T	TA	1	NA
Dmel	2L	15887766	GAAACTCATAGTAGACGTAAAGGTACGGGCGAAAAGTGTCTGTCATCCCGATGATATGGTAGGTTCCGGGGAAATAGTCTTTA	TCT	-80	NA
Dmel	2L	15965581	CC	C	-1	NA
Dmel	2L	15972943	A	ACACTA	5	NA
Dmel	2L	16087379	TGTAGTC	AT	-5	NA
Dmel	2L	16087390	ATA	A	-2	NA
Dmel	2L	16096827	T	TTTAATATTAATTT	13	NA
Dmel	2L	16099903	TG	T	-1	NA
Dmel	2L	16104604	CCTCCTCATCAAA	C	-12	3
Dmel	2L	16104628	A	ATGCGT	5	NA
Dmel	2L	16105280	GAATGAGTTGTTAGAGCTCT	G	-19	0
Dmel	2L	16105346	T	TTC	2	NA
Dmel	2L	16105356	C	AGA	2	NA
Dmel	2L	16105379	CCA	C	-2	NA
Dmel	2L	16105386	AG	A	-1	NA
Dmel	2L	16108410	CG	T	-1	NA
Dmel	2L	16108441	GCA	G	-2	NA
Dmel	2L	16114221	TTAATATTTAATGTAATA	T	-17	3
Dmel	2L	16124802	T	AC	1	NA
Dmel	2L	16205267	T	TA	1	NA
Dmel	2L	16205272	AG	A	-1	NA
Dmel	2L	16293761	TATATTCTTGGTCAAGTCTGT	T	-20	1
Dmel	2L	16397007	CA	C	-1	NA
Dmel	2L	16538173	A	ACATAT	5	NA
Dmel	2L	16539830	GATATGCCCGG	G	-10	5
Dmel	2L	16540544	T	TTGAATACTTAA	11	NA
Dmel	2L	16540548	A	AGT	2	NA
Dmel	2L	16540601	AGCTT	C	-4	NA
Dmel	2L	16727930	A	AGT	2	NA
Dmel	2L	16801608	T	TAATTATTTTGTT	12	NA
Dmel	2L	16869188	T	TG	1	NA
Dmel	2L	16886368	A	AAAACGAACTAATATAGTTCATTTGTATAAAAAGGATTGT	39	NA
Dmel	2L	16886373	A	AAGCTCTTTTTATTGT	15	NA
Dmel	2L	16886382	T	TGTTTTCCCTACATTTACTA	19	NA
Dmel	2L	16886393	T	TTTTAATGAGATTTATTTATTAT	22	NA
Dmel	2L	16918533	GCAATACACAAAATTA	G	-15	0
Dmel	2L	16921376	GAG	G	-2	NA
Dmel	2L	16931490	T	TCTCTCCCATTT	11	NA
Dmel	2L	16934340	CAA	T	-2	NA
Dmel	2L	16936488	AATTACGACG	A	-9	0
Dmel	2L	16936582	TG	T	-1	NA
Dmel	2L	16955778	T	TT	1	NA
Dmel	2L	16967623	AG	A	-1	NA
Dmel	2L	16996092	A	AGCTTTGCATAAAT	13	NA
Dmel	2L	16996169	A	ATA	2	NA
Dmel	2L	17037464	CTCTC	C	-4	NA
Dmel	2L	17106022	GCAC	G	-3	NA
Dmel	2L	17112887	CTG	C	-2	NA
Dmel	2L	17260932	AGAATCAAACAGAAACATGCAATATCTTCGC	A	-30	0
Dmel	2L	17294347	G	TTTACTTCAATTTACTTATTT	20	NA
Dmel	2L	17295565	AG	A	-1	NA
Dmel	2L	17300498	TT	T	-1	NA
Dmel	2L	17303213	A	AAAAAAAG	7	NA
Dmel	2L	17304404	CTT	C	-2	NA
Dmel	2L	17313412	AAAC	A	-3	NA
Dmel	2L	17319430	GC	G	-1	NA
Dmel	2L	17486792	AAGT	A	-3	NA
Dmel	2L	17498857	A	AC	1	NA
Dmel	2L	17536870	GG	G	-1	NA
Dmel	2L	17569071	T	TTCGTTTAAACCTTT	14	NA
Dmel	2L	17575907	GA	ATGGCG	4	NA
Dmel	2L	17633699	A	ATTT	3	NA
Dmel	2L	17779952	TGAA	T	-3	NA
Dmel	2L	17779962	T	TACTAC	5	NA
Dmel	2L	17782654	C	CTGTTTAAGTCACAGC	15	NA
Dmel	2L	17782890	C	CG	1	NA
Dmel	2L	17782894	T	TCC	2	NA
Dmel	2L	17885209	T	TAC	2	NA
Dmel	2L	17900588	A	AA	1	NA
Dmel	2L	17926033	TAAAGCCACGTCAGCTTAAAAATAAGTGCTGACTTTTGTTGTTAGGCCACACATAAATTCATTGC	T	-64	0
Dmel	2L	17926153	ATTT	A	-3	NA
Dmel	2L	17926171	TAGTCG	T	-5	NA
Dmel	2L	17943300	GCCGAAAGTCTG	G	-11	1
Dmel	2L	17954135	A	AGAACT	5	NA
Dmel	2L	17960689	A	ATTCAATAGAA	10	NA
Dmel	2L	17960810	C	CGT	2	NA
Dmel	2L	18087671	GCACTTTTATGTATAATATACAAACATTTTATAAAATAGTTGTGCAGCGACTTCGGTATC	G	-59	0
Dmel	2L	18113844	G	GG	1	NA
Dmel	2L	18429896	A	AC	1	NA
Dmel	2L	18818529	TC	T	-1	NA
Dmel	2L	18884515	G	GG	1	NA
Dmel	2L	18884539	TTTAAAA	C	-6	NA
Dmel	2L	18884549	GTTCAAATATTTTC	G	-13	0
Dmel	2L	18884632	TATA	T	-3	NA
Dmel	2L	18887549	T	TTTG	3	NA
Dmel	2L	18902164	A	ACATA	4	NA
Dmel	2L	18906751	G	AGAA	3	NA
Dmel	2L	18944936	GTCGCT	G	-5	NA
Dmel	2L	19076151	AAATG	A	-4	NA
Dmel	2L	19076160	TAGTGTCGCTGGAGAAAT	T	-17	2
Dmel	2L	19076629	GAACTCGACTA	G	-10	0
Dmel	2L	19121092	CCGGAATTTCAAAATTCAGTTGAAAT	C	-25	0
Dmel	2L	19212636	ATATAAGAGA	A	-9	2
Dmel	2L	19213510	AGTGGTT	A	-6	NA
Dmel	2L	19224533	GCAATAGG	G	-7	NA
Dmel	2L	19238096	A	TTGTATTCTTCAAAACCT	17	NA
Dmel	2L	19240785	C	CCCACACACTTTCACAC	16	NA
Dmel	2L	19243613	AGGA	A	-3	NA
Dmel	2L	19251234	AA	A	-1	NA
Dmel	2L	19251324	A	AGAG	3	NA
Dmel	2L	19264113	AA	A	-1	NA
Dmel	2L	19264786	T	TG	1	NA
Dmel	2L	19290202	G	TT	1	NA
Dmel	2L	19306778	AA	A	-1	NA
Dmel	2L	19308270	AG	T	-1	NA
Dmel	2L	19309428	AT	A	-1	NA
Dmel	2L	19316309	GT	G	-1	NA
Dmel	2L	19335248	T	TTTCAAAT	7	NA
Dmel	2L	19335253	G	ACGT	3	NA
Dmel	2L	19335265	AAT	A	-2	NA
Dmel	2L	19368256	T	TATGACA	6	NA
Dmel	2L	19375792	G	GCCGG	4	NA
Dmel	2L	19377386	TTTTAAGACAGTT	T	-12	3
Dmel	2L	19399586	A	ATGA	3	NA
Dmel	2L	19480709	G	GGGGAGAGTC	9	NA
Dmel	2L	20105874	TATTATTTTTGCACTCAAC	T	-18	0
Dmel	2L	20113068	AAC	A	-2	NA
Dmel	2L	20113073	ATTCTTTG	A	-7	NA
Dmel	2L	20204313	T	TGTG	3	NA
Dmel	2L	20204316	C	CCAGAATTCGATTTTTTTGGCATAAAGTCTAAAAAT	35	NA
Dmel	2L	20253790	C	CTA	2	NA
Dmel	2L	20259262	A	AAGACCAA	7	NA
Dmel	2L	20259688	TGT	T	-2	NA
Dmel	2L	20269923	G	GCC	2	NA
Dmel	2L	20285511	CC	C	-1	NA
Dmel	2L	20383493	CAATTTGGTCCTAAATAAAAATTTCCTGGGCACCTGTAAC	C	-39	3
Dmel	2L	20536137	G	GAA	2	NA
Dmel	2L	20536597	GC	A	-1	NA
Dmel	2L	20752390	C	CTCAAAAAGAGCCAC	14	NA
Dmel	2L	20783376	C	CC	1	NA
Dmel	2L	20797186	T	TTTCTTACCTTAAGTTTTGTAATACATTAGTTTTTATAAATA	41	NA
Dmel	2L	20923011	AAA	T	-2	NA
Dmel	2L	20923018	TCGAGCTTC	T	-8	0
Dmel	2L	20923030	AAAC	A	-3	NA
Dmel	2L	20951936	AAATT	A	-4	NA
Dmel	2L	21734232	G	GACGTGCG	7	NA
Dmel	2L	21734234	A	ACAAACCCTCGTTG	13	NA
Dmel	2L	21809722	TGGACCTGAATGAAAAGATCT	T	-20	2
Dmel	2L	21900426	AAA	A	-2	NA
Dmel	2L	21902561	ATACAGCCATGCCGGTCGTATGA	A	-22	2
Dmel	2L	21926097	AA	A	-1	NA
Dmel	2L	21971436	A	AATTTCTTTTTTA	12	NA
Dmel	2L	21971439	CCCGTTGCTCG	A	-10	0
Dmel	2L	22003399	G	GGGAGTTTCTGTTTTTTTAATGGAA	24	NA
Dmel	2L	22025875	TATCAAATACTAG	T	-12	0
Dmel	2L	22025894	TGTAAGCATTATGTT	T	-14	2
Dmel	2L	22054560	AG	A	-1	NA
Dmel	2L	22278835	A	AA	1	NA
Dmel	2L	22299133	T	TCGCTT	5	NA
Dmel	2L	22299136	A	AGA	2	NA
Dmel	2L	22652678	T	TTTAAAATAATAACTGT	16	NA
Dmel	2L	22697318	A	AG	1	NA
Dmel	2R	578239	C	CAGACTGACT	9	NA
Dmel	2R	738775	AT	A	-1	NA
Dmel	2R	738779	C	CAG	2	NA
Dmel	2R	743637	GC	G	-1	NA
Dmel	2R	804557	TT	T	-1	NA
Dmel	2R	959565	GCCACCAGT	G	-8	0
Dmel	2R	974188	T	TTCCTGT	6	NA
Dmel	2R	986665	TC	T	-1	NA
Dmel	2R	993953	AGGTCAAAA	A	-8	2
Dmel	2R	1260765	TT	T	-1	NA
Dmel	2R	1261252	TC	T	-1	NA
Dmel	2R	1261320	C	CCTGTT	5	NA
Dmel	2R	1264121	AGGAAACATGATCAAGTTTATTAGTGGCTTTAAT	A	-33	0
Dmel	2R	1264160	TCTTGTA	GG	-5	NA
Dmel	2R	1288070	TCGAACTGTCGC	T	-11	0
Dmel	2R	1288082	A	ATT	2	NA
Dmel	2R	1523341	GAACCATTTAGATGTACTTAGGGAGCTAGCCCTGCACATAAAGCACGCGGGCTTAACAGTAAACAACGCTAAAATTCACTTTTGTATGTGACGAGTACGCTATTTGGGCG	G	-109	1
Dmel	2R	1557969	T	TT	1	NA
Dmel	2R	1627304	T	TGA	2	NA
Dmel	2R	1755731	T	TT	1	NA
Dmel	2R	1778790	GTCTATTGCAACT	G	-12	0
Dmel	2R	1912521	AT	A	-1	NA
Dmel	2R	2128647	CAATAGTCCAGT	C	-11	0
Dmel	2R	2154178	A	AT	1	NA
Dmel	2R	2154188	C	CC	1	NA
Dmel	2R	2534139	G	GTC	2	NA
Dmel	2R	2736482	GCAAAGTG	G	-7	NA
Dmel	2R	2916400	AC	A	-1	NA
Dmel	2R	2951692	TTGCAGCCATTTAAT	T	-14	2
Dmel	2R	3138280	TCTTTGCATAACTGCCGGGGTTTCCCCATCGAGCGTGCCTTGCATAT	T	-46	2
Dmel	2R	3144248	TGTCTTA	GAAG	-3	NA
Dmel	2R	3144327	ATTTA	A	-4	NA
Dmel	2R	3192999	ATG	A	-2	NA
Dmel	2R	3298207	TCGCCGAAAA	T	-9	0
Dmel	2R	3341091	T	AGA	2	NA
Dmel	2R	3776911	CC	C	-1	NA
Dmel	2R	3886638	G	TT	1	NA
Dmel	2R	3917809	TT	T	-1	NA
Dmel	2R	4120322	A	AT	1	NA
Dmel	2R	4120326	TTTTGAAGG	T	-8	0
Dmel	2R	4120348	AAATCAA	A	-6	NA
Dmel	2R	4120360	T	TT	1	NA
Dmel	2R	4120382	T	TGTTA	4	NA
Dmel	2R	4139333	A	AA	1	NA
Dmel	2R	4141297	T	TG	1	NA
Dmel	2R	4167882	CC	C	-1	NA
Dmel	2R	4171414	G	AA	1	NA
Dmel	2R	4178237	GT	C	-1	NA
Dmel	2R	4178577	G	GCCACGG	6	NA
Dmel	2R	4187489	A	AA	1	NA
Dmel	2R	4198006	AA	A	-1	NA
Dmel	2R	4214185	TAAA	C	-3	NA
Dmel	2R	4440110	TCCC	T	-3	NA
Dmel	2R	4440120	TGTTACTAGG	T	-9	0
Dmel	2R	4475682	GCGTAC	CT	-4	NA
Dmel	2R	4481242	TA	T	-1	NA
Dmel	2R	4522123	G	AT	1	NA
Dmel	2R	4534577	T	TAATG	4	NA
Dmel	2R	4534579	T	TGAGAAGA	7	NA
Dmel	2R	4746083	T	TAA	2	NA
Dmel	2R	4879366	TTTTACAAA	T	-8	0
Dmel	2R	4920766	GCCTGGCTG	G	-8	1
Dmel	2R	4923631	C	CGC	2	NA
Dmel	2R	5103775	G	GAG	2	NA
Dmel	2R	5103805	TTAACGCACTTTTCCAATTTTTTGAAATTACCCACTCTTATATGATAGAACTAACTGTT	CAATA	-54	NA
Dmel	2R	5103923	A	AGTGCGTTG	8	NA
Dmel	2R	5115029	T	TAACTGTT	7	NA
Dmel	2R	5135561	G	GA	1	NA
Dmel	2R	5135564	T	TTGAATTAAAAATG	13	NA
Dmel	2R	5135575	T	TTATATGTTT	9	NA
Dmel	2R	5282798	T	TTTCT	4	NA
Dmel	2R	5301625	TATCTTT	T	-6	NA
Dmel	2R	5301714	CGC	C	-2	NA
Dmel	2R	5380416	A	AAGGTTTAAGCCA	12	NA
Dmel	2R	5585136	A	ATAA	3	NA
Dmel	2R	5639609	A	ATTATGTATTTATGTATGTATTGT	23	NA
Dmel	2R	5694957	T	TG	1	NA
Dmel	2R	5698112	A	ATAATTATATGCTCA	14	NA
Dmel	2R	5791150	TT	T	-1	NA
Dmel	2R	5791205	TTAT	T	-3	NA
Dmel	2R	5852680	T	TTAAATT	6	NA
Dmel	2R	5852784	T	TTATATATTTTTGAT	14	NA
Dmel	2R	5856097	C	TAACAATTCTAGACCA	15	NA
Dmel	2R	5863588	T	TGGG	3	NA
Dmel	2R	5875617	TT	T	-1	NA
Dmel	2R	6082613	A	AGGTA	4	NA
Dmel	2R	6083098	A	ATAATAATATATA	12	NA
Dmel	2R	6083474	C	CC	1	NA
Dmel	2R	6090381	TTTCCTT	T	-6	NA
Dmel	2R	6090443	T	TA	1	NA
Dmel	2R	6090444	T	TT	1	NA
Dmel	2R	6091294	T	TCAACCC	6	NA
Dmel	2R	6151812	CC	G	-1	NA
Dmel	2R	6152146	T	AAATATATACATACA	14	NA
Dmel	2R	6152153	C	CCTCACTAC	8	NA
Dmel	2R	6200627	GG	G	-1	NA
Dmel	2R	6313292	T	GCCTTAAAG	8	NA
Dmel	2R	6313327	AACAGAA	A	-6	NA
Dmel	2R	6324893	T	TGCTTAAAT	8	NA
Dmel	2R	6325402	TGTT	T	-3	NA
Dmel	2R	6366352	CTGATCATTAAAATAAGATGGTGC	C	-23	1
Dmel	2R	6435659	ATTCGGCGAT	A	-9	2
Dmel	2R	6436597	CTATATTTCTATACCAATTAGC	C	-21	1
Dmel	2R	6437555	AT	A	-1	NA
Dmel	2R	6441290	C	AAT	2	NA
Dmel	2R	6441301	T	TT	1	NA
Dmel	2R	6441363	T	TGT	2	NA
Dmel	2R	6442339	CAAC	C	-3	NA
Dmel	2R	6533010	A	ACGG	3	NA
Dmel	2R	6543997	C	CAAAAGCAATA	10	NA
Dmel	2R	6545114	CTTTAAAAAGTT	C	-11	1
Dmel	2R	6555265	CAAGCAGTTTAAGCTT	C	-15	0
Dmel	2R	6555976	TCCTAAAACAATTC	A	-13	0
Dmel	2R	6557340	A	AA	1	NA
Dmel	2R	6559105	T	CGTTCAAGATGTG	12	NA
Dmel	2R	6560358	TCAAGTTTTACCCGTAAGGGATAATGTTCCACCATCTTTAGATTCGCAAACTAATTCCGATTACAGGTGTTGGCCCGATGCACAGATA	GCCCGATGCACAGATT	-72	NA
Dmel	2R	6687411	TACGGCTTAAG	T	-10	0
Dmel	2R	6698557	A	AA	1	NA
Dmel	2R	6723366	CAGCGATGGGG	C	-10	2
Dmel	2R	6774012	T	TAAAG	4	NA
Dmel	2R	6786723	G	GAAGCACCTTGTAAA	14	NA
Dmel	2R	6786751	C	CTGGGGAT	7	NA
Dmel	2R	6786764	GACGTG	A	-5	NA
Dmel	2R	6786961	GAC	TTTCCTTTCCATT	10	NA
Dmel	2R	6787809	T	TCGTCG	5	NA
Dmel	2R	6794901	TC	T	-1	NA
Dmel	2R	6796176	T	TTTAATATATATATAT	15	NA
Dmel	2R	6798032	A	ACAATA	5	NA
Dmel	2R	6798053	G	GGA	2	NA
Dmel	2R	6798057	T	TCTTGTGTAAGGCAAGGACTTAATTCTG	27	NA
Dmel	2R	6798065	T	TGTGGGTG	7	NA
Dmel	2R	6798081	C	CAACTGATTTTATAACATTTTTCTAAGCTTAAACC	34	NA
Dmel	2R	6798114	T	TGGCTG	5	NA
Dmel	2R	6798123	AG	A	-1	NA
Dmel	2R	6798130	A	TCTCGTTTCCACCGCACTTTAATTTCAG	27	NA
Dmel	2R	6800672	TT	AAAA	2	NA
Dmel	2R	6804950	T	TTTCTAT	6	NA
Dmel	2R	6804981	T	TGC	2	NA
Dmel	2R	6804998	TTCAT	T	-4	NA
Dmel	2R	6805251	G	GATG	3	NA
Dmel	2R	6807508	GGGGCTATTACTCCAAG	G	-16	3
Dmel	2R	6810159	GGGCAGATAGCCAACAG	G	-16	3
Dmel	2R	6812056	T	TATATGCTCA	9	NA
Dmel	2R	6814901	GG	G	-1	NA
Dmel	2R	6815525	CA	T	-1	NA
Dmel	2R	6820448	AAAGTAAATA	A	-9	3
Dmel	2R	6820671	TG	C	-1	NA
Dmel	2R	6820675	CAT	TG	-1	NA
Dmel	2R	6820842	GCCCCG	G	-5	NA
Dmel	2R	6822271	TACTTGT	T	-6	NA
Dmel	2R	6825149	T	TGTAACATTT	9	NA
Dmel	2R	6832530	TT	T	-1	NA
Dmel	2R	6834714	T	TTACT	4	NA
Dmel	2R	6834726	T	TGGTCT	5	NA
Dmel	2R	6834748	A	ATTATTTAAAACA	12	NA
Dmel	2R	6834925	A	ACCTGTG	6	NA
Dmel	2R	6834927	TTCAGGT	T	-6	NA
Dmel	2R	6845618	A	ACCAGCCA	7	NA
Dmel	2R	6845628	C	ATTTTT	5	NA
Dmel	2R	6846515	TGCGA	T	-4	NA
Dmel	2R	6848048	T	TAAGAA	5	NA
Dmel	2R	6849969	T	TCGCC	4	NA
Dmel	2R	6850138	G	GG	1	NA
Dmel	2R	6851155	GTG	A	-2	NA
Dmel	2R	6854897	TTTTCAAATGATC	T	-12	0
Dmel	2R	6859621	T	TT	1	NA
Dmel	2R	6859653	A	ATGT	3	NA
Dmel	2R	6859753	G	TGAA	3	NA
Dmel	2R	6865346	CGACAACAGC	C	-9	2
Dmel	2R	7017373	GTGCCTTTGAAACTCGTTCCACATTTAACGC	G	-30	0
Dmel	2R	7020278	CATAGG	T	-5	NA
Dmel	2R	7020602	TT	T	-1	NA
Dmel	2R	7021189	TCGGGGCATATTTGATTCTTTTAGCTGCCGATGCTCGGATTGAACAA	T	-46	0
Dmel	2R	7021893	ACATGAACAA	A	-9	3
Dmel	2R	7021926	A	AC	1	NA
Dmel	2R	7021995	C	TT	1	NA
Dmel	2R	7022032	CT	G	-1	NA
Dmel	2R	7022146	A	AA	1	NA
Dmel	2R	7120624	TTATTAAT	A	-7	NA
Dmel	2R	7126976	G	GT	1	NA
Dmel	2R	7127906	TTCACA	T	-5	NA
Dmel	2R	7135404	TAG	A	-2	NA
Dmel	2R	7135445	A	ACA	2	NA
Dmel	2R	7135545	AGACCCGACT	GGGGTG	-4	NA
Dmel	2R	7136573	GG	G	-1	NA
Dmel	2R	7137596	T	TAATA	4	NA
Dmel	2R	7137783	TCGCATC	T	-6	NA
Dmel	2R	7150261	TGACTGTAA	T	-8	0
Dmel	2R	7151344	GAA	G	-2	NA
Dmel	2R	7151351	AC	A	-1	NA
Dmel	2R	7260567	AT	A	-1	NA
Dmel	2R	7260619	GGTACTTAGATTG	G	-12	4
Dmel	2R	7267624	CC	G	-1	NA
Dmel	2R	7267667	A	ATTTCCATAGGATACGCCA	18	NA
Dmel	2R	7287207	A	ACATGAAAATCG	11	NA
Dmel	2R	7293048	A	AGA	2	NA
Dmel	2R	7317369	GTAATGACTCTTGTGG	G	-15	1
Dmel	2R	7318828	T	TTGCTCCTAT	9	NA
Dmel	2R	7322507	TAAAG	C	-4	NA
Dmel	2R	7359258	A	TATAT	4	NA
Dmel	2R	7398742	TT	T	-1	NA
Dmel	2R	7398824	CTC	A	-2	NA
Dmel	2R	7400367	ATG	A	-2	NA
Dmel	2R	7400390	AAAA	A	-3	NA
Dmel	2R	7400404	AGAA	A	-3	NA
Dmel	2R	7403566	C	CGC	2	NA
Dmel	2R	7408785	G	GTA	2	NA
Dmel	2R	7423392	TTC	GA	-1	NA
Dmel	2R	7426821	GATTATA	G	-6	NA
Dmel	2R	7426868	TA	T	-1	NA
Dmel	2R	7435563	A	AT	1	NA
Dmel	2R	7437234	A	AATGTTA	6	NA
Dmel	2R	7437350	TTAAGAATATAT	T	-11	3
Dmel	2R	7441886	C	CAGAC	4	NA
Dmel	2R	7446858	AT	A	-1	NA
Dmel	2R	7449214	C	CGC	2	NA
Dmel	2R	7450931	T	TTATTTATAGGCC	12	NA
Dmel	2R	7455649	A	ACA	2	NA
Dmel	2R	7456144	ATATATGT	A	-7	NA
Dmel	2R	7458015	GTAG	G	-3	NA
Dmel	2R	7458670	TG	A	-1	NA
Dmel	2R	7459389	AGC	A	-2	NA
Dmel	2R	7460073	AGAAAATCACAAATAATAATCGA	A	-22	2
Dmel	2R	7462527	AATTA	A	-4	NA
Dmel	2R	7462734	A	ACCTAT	5	NA
Dmel	2R	7504238	T	TAAAA	4	NA
Dmel	2R	7504257	T	ACTCTTTAAAAAATC	14	NA
Dmel	2R	7504265	T	GCAATGGCAGATGATACAGCTCACCAAACGCA	31	NA
Dmel	2R	7506665	ATGA	A	-3	NA
Dmel	2R	7597666	A	ATTTTCA	6	NA
Dmel	2R	7617107	G	GCTTT	4	NA
Dmel	2R	7620592	AAAGGGAGCGACA	A	-12	4
Dmel	2R	7621566	A	AACTACGTAGA	10	NA
Dmel	2R	7621605	ACAT	TA	-2	NA
Dmel	2R	7621667	T	TAAAAGTAA	8	NA
Dmel	2R	7624894	TTG	C	-2	NA
Dmel	2R	7624919	TG	T	-1	NA
Dmel	2R	7625498	GC	G	-1	NA
Dmel	2R	7627282	A	AACTAAAGTATACA	13	NA
Dmel	2R	7631023	T	TT	1	NA
Dmel	2R	7634051	ATCGGCATATTTAAAATGTAT	A	-20	0
Dmel	2R	7634074	GTTGAA	G	-5	NA
Dmel	2R	7634148	GGTACACATATTTAAAAT	G	-17	0
Dmel	2R	7637120	TGG	A	-2	NA
Dmel	2R	7637127	A	AGTTGGTTTGTT	11	NA
Dmel	2R	7637136	AGTGTCTAA	A	-8	4
Dmel	2R	7638368	AGAACGTCT	G	-8	0
Dmel	2R	7703955	A	AA	1	NA
Dmel	2R	7706420	ATTTAAAATTATTTTG	A	-15	0
Dmel	2R	7709200	A	AGT	2	NA
Dmel	2R	7710366	AGA	A	-2	NA
Dmel	2R	7710535	CCATATCCAAATTACTTCTGAGTCT	A	-24	0
Dmel	2R	7711952	C	CGTA	3	NA
Dmel	2R	7711987	C	CGATGTAAC	8	NA
Dmel	2R	7712071	AC	A	-1	NA
Dmel	2R	7727338	A	AA	1	NA
Dmel	2R	7727351	TATTTATTCATTTTG	T	-14	0
Dmel	2R	7728131	T	TG	1	NA
Dmel	2R	7755305	ATACTC	A	-5	NA
Dmel	2R	7803132	GTTTTG	G	-5	NA
Dmel	2R	7803144	CA	C	-1	NA
Dmel	2R	7806648	ATCCTATAC	A	-8	0
Dmel	2R	7808676	GAAATGTGTACCTAT	C	-14	0
Dmel	2R	7808729	TT	T	-1	NA
Dmel	2R	7808770	ACATA	A	-4	NA
Dmel	2R	7811523	A	AA	1	NA
Dmel	2R	7812930	AA	A	-1	NA
Dmel	2R	7813083	ACGTTTAAACATTAATATAGTCGGA	A	-24	2
Dmel	2R	7816243	TTTAAAGAAAACA	T	-12	0
Dmel	2R	7816260	TTCCTTATTCACAA	T	-13	0
Dmel	2R	7823421	TAA	G	-2	NA
Dmel	2R	7858047	GAA	T	-2	NA
Dmel	2R	7886247	GG	G	-1	NA
Dmel	2R	7887083	GA	G	-1	NA
Dmel	2R	7888763	A	AA	1	NA
Dmel	2R	7908130	T	GC	1	NA
Dmel	2R	7908146	CCAATTTAAAAA	C	-11	4
Dmel	2R	7910220	C	CAGAAGGGTGATGAC	14	NA
Dmel	2R	7910270	A	AA	1	NA
Dmel	2R	7910293	TTGG	CAC	-1	NA
Dmel	2R	7910332	A	AAGATA	5	NA
Dmel	2R	7931108	GG	G	-1	NA
Dmel	2R	7950895	C	CTAGGCGACGCTTCT	14	NA
Dmel	2R	7972467	AA	A	-1	NA
Dmel	2R	8090555	AAAA	A	-3	NA
Dmel	2R	8092369	AGTCTTTAGGA	T	-10	1
Dmel	2R	8092784	A	AT	1	NA
Dmel	2R	8101449	TTATTTAAT	T	-8	3
Dmel	2R	8106419	T	TGGAATA	6	NA
Dmel	2R	8106854	ATA	A	-2	NA
Dmel	2R	8108834	TTTCTT	T	-5	NA
Dmel	2R	8110592	TAC	T	-2	NA
Dmel	2R	8110600	C	CAT	2	NA
Dmel	2R	8111200	CATTTCAA	G	-7	NA
Dmel	2R	8117231	TCAT	T	-3	NA
Dmel	2R	8117465	TGTGCGCCGCCT	T	-11	1
Dmel	2R	8117934	TTA	T	-2	NA
Dmel	2R	8117950	T	TTCT	3	NA
Dmel	2R	8117970	TAGTAT	T	-5	NA
Dmel	2R	8117988	ATATCTTT	A	-7	NA
Dmel	2R	8118660	CCATAGAGC	C	-8	2
Dmel	2R	8118689	ACTATGTATCCTAAAGATATGAA	A	-22	1
Dmel	2R	8118745	ATGTAATATAGCTTA	A	-14	1
Dmel	2R	8122451	A	AAA	2	NA
Dmel	2R	8123259	ATTCATTTCCTAACCA	A	-15	1
Dmel	2R	8125091	C	TTTTGATTGAGTTTG	14	NA
Dmel	2R	8125560	AT	A	-1	NA
Dmel	2R	8125574	T	TACATTTTAA	9	NA
Dmel	2R	8127542	TAAATAAA	GGAAGC	-2	NA
Dmel	2R	8127574	TAA	T	-2	NA
Dmel	2R	8127580	AAA	G	-2	NA
Dmel	2R	8127607	GCC	T	-2	NA
Dmel	2R	8132342	A	AA	1	NA
Dmel	2R	8132584	CTTTGCCATACATTC	C	-14	1
Dmel	2R	8132623	CGATAAGCATAA	T	-11	3
Dmel	2R	8135452	GGGTCAACGAACTGACGCTGCGTCTTTG	G	-27	2
Dmel	2R	8136035	A	AA	1	NA
Dmel	2R	8137167	C	CCT	2	NA
Dmel	2R	8137175	C	TCTT	3	NA
Dmel	2R	8137666	TC	T	-1	NA
Dmel	2R	8166341	T	TGTGTTGTG	8	NA
Dmel	2R	8166343	TACAG	T	-4	NA
Dmel	2R	8258779	A	TATAT	4	NA
Dmel	2R	8272904	TGCATTCACTTTTTAAATATTTTACAACT	T	-28	2
Dmel	2R	8278270	GAGATAGTAGTAGACTAG	C	-17	3
Dmel	2R	8278327	AA	A	-1	NA
Dmel	2R	8279395	T	TTCTTTATTTATGT	13	NA
Dmel	2R	8279491	C	CC	1	NA
Dmel	2R	8286923	A	AT	1	NA
Dmel	2R	8299238	TAGA	G	-3	NA
Dmel	2R	8300655	AAAACGACTCTTCATAAATAAGTAA	A	-24	1
Dmel	2R	8300753	T	TGT	2	NA
Dmel	2R	8301058	TTTAAAAT	T	-7	NA
Dmel	2R	8302966	TTT	T	-2	NA
Dmel	2R	8306020	A	CTCTCGATCTCTTGGCCTCTGGCATGGTATCAGGACAACCTGTCAAGGCAGAAGGATATCTGCGTGGCAGTACTGCAACGTTGATCTTGTACCTTTTCACCATTTGCACAAAATCCTCTGGGAGAACTGTATTG	133	NA
Dmel	2R	8306368	TT	T	-1	NA
Dmel	2R	8306599	A	TT	1	NA
Dmel	2R	8307188	ATAGTCAGGGAAATGG	A	-15	0
Dmel	2R	8359311	G	GTC	2	NA
Dmel	2R	8411359	CCAGAGTCCATAACAT	C	-15	0
Dmel	2R	8412110	TT	T	-1	NA
Dmel	2R	8412118	T	TTT	2	NA
Dmel	2R	8412641	C	CT	1	NA
Dmel	2R	8452567	GTTGATTTCCACTCAAAA	G	-17	0
Dmel	2R	8452588	TGTTACTTTTCAACGTAG	T	-17	0
Dmel	2R	8452778	GTTTTC	A	-5	NA
Dmel	2R	8452793	T	TTCATTC	6	NA
Dmel	2R	8453046	GGA	C	-2	NA
Dmel	2R	8511088	G	GGCC	3	NA
Dmel	2R	8511173	AA	A	-1	NA
Dmel	2R	8520138	T	TTAGTT	5	NA
Dmel	2R	8524101	GT	G	-1	NA
Dmel	2R	8538203	GAT	G	-2	NA
Dmel	2R	8540148	GA	T	-1	NA
Dmel	2R	8557894	AAA	G	-2	NA
Dmel	2R	8581505	TT	T	-1	NA
Dmel	2R	8584155	TCG	T	-2	NA
Dmel	2R	8585122	T	TGTAT	4	NA
Dmel	2R	8586604	A	AT	1	NA
Dmel	2R	8586700	T	TACT	3	NA
Dmel	2R	8586719	TG	T	-1	NA
Dmel	2R	8586976	AGC	A	-2	NA
Dmel	2R	8587234	CCTC	C	-3	NA
Dmel	2R	8591292	T	TATTTAA	6	NA
Dmel	2R	8591304	CT	AAAC	2	NA
Dmel	2R	8592456	C	CTT	2	NA
Dmel	2R	8592484	AG	C	-1	NA
Dmel	2R	8656612	A	ATTC	3	NA
Dmel	2R	8658556	AAG	A	-2	NA
Dmel	2R	8661605	C	CTTTCAC	6	NA
Dmel	2R	8661812	GTCTTAACATTAGCTCACGATATGCAG	G	-26	3
Dmel	2R	8661886	TTTAT	T	-4	NA
Dmel	2R	8696039	GAG	G	-2	NA
Dmel	2R	8696656	AC	A	-1	NA
Dmel	2R	8697012	CTGAT	C	-4	NA
Dmel	2R	8702260	TTAGCT	T	-5	NA
Dmel	2R	8705917	GCTTGCAACAGCGATCA	G	-16	0
Dmel	2R	8705936	TAA	T	-2	NA
Dmel	2R	8705940	GCTTTATTAAATAA	G	-13	0
Dmel	2R	8712928	TC	T	-1	NA
Dmel	2R	8713080	ACGGAGCAAATCGCAC	A	-15	0
Dmel	2R	8713178	GT	G	-1	NA
Dmel	2R	8715997	G	ACTTACTTACTATACTATTGT	20	NA
Dmel	2R	8716065	C	TT	1	NA
Dmel	2R	8716091	T	TGAGTGTT	7	NA
Dmel	2R	8716104	AAATGG	TT	-4	NA
Dmel	2R	8716506	A	AA	1	NA
Dmel	2R	8717833	GGGATG	G	-5	NA
Dmel	2R	8717882	T	TTCTTG	5	NA
Dmel	2R	8717916	TC	T	-1	NA
Dmel	2R	8717948	TGAAAATCTA	T	-9	0
Dmel	2R	8719028	A	ACGAA	4	NA
Dmel	2R	8719030	T	TCATAATACA	9	NA
Dmel	2R	8724793	A	AA	1	NA
Dmel	2R	8732341	A	AA	1	NA
Dmel	2R	8793770	CCTGGAA	C	-6	NA
Dmel	2R	8794980	G	GCT	2	NA
Dmel	2R	8794987	T	TTAT	3	NA
Dmel	2R	8795004	TTA	T	-2	NA
Dmel	2R	8795921	TTTC	GAA	-1	NA
Dmel	2R	8797416	G	TCT	2	NA
Dmel	2R	8798274	TGGTT	T	-4	NA
Dmel	2R	8798307	AGTGTATATATATAT	A	-14	0
Dmel	2R	8799029	ACT	A	-2	NA
Dmel	2R	8803329	TC	T	-1	NA
Dmel	2R	8840282	T	TGTTTAT	6	NA
Dmel	2R	8846473	C	CGC	2	NA
Dmel	2R	8846824	A	AA	1	NA
Dmel	2R	8847465	AC	A	-1	NA
Dmel	2R	8848360	C	TT	1	NA
Dmel	2R	8849712	A	AG	1	NA
Dmel	2R	8869275	AT	A	-1	NA
Dmel	2R	8875364	T	AAGTTTACAGA	10	NA
Dmel	2R	8877377	T	TT	1	NA
Dmel	2R	8878883	T	CCAACC	5	NA
Dmel	2R	8878893	T	TTTCAAGTTAAGT	12	NA
Dmel	2R	8880962	T	TGTT	3	NA
Dmel	2R	8895793	GG	G	-1	NA
Dmel	2R	8900424	C	CA	1	NA
Dmel	2R	8901635	TATTTCTGCCTGATT	T	-14	1
Dmel	2R	8902664	CT	A	-1	NA
Dmel	2R	8904252	A	AACA	3	NA
Dmel	2R	8905063	GGAG	G	-3	NA
Dmel	2R	8907993	G	GG	1	NA
Dmel	2R	8909504	T	TTGATAGTAA	9	NA
Dmel	2R	8909614	TC	T	-1	NA
Dmel	2R	8913412	TTTCCCAATT	T	-9	4
Dmel	2R	8914753	C	CTTC	3	NA
Dmel	2R	8914823	C	ACTT	3	NA
Dmel	2R	8915792	C	CTGCTACC	7	NA
Dmel	2R	8919377	AA	A	-1	NA
Dmel	2R	8920028	GTC	G	-2	NA
Dmel	2R	8924087	TA	T	-1	NA
Dmel	2R	8924674	T	TGACTT	5	NA
Dmel	2R	8925006	TGA	T	-2	NA
Dmel	2R	8928823	T	TA	1	NA
Dmel	2R	8928886	ATAAATG	T	-6	NA
Dmel	2R	8932033	T	TCAAATT	6	NA
Dmel	2R	8932084	AAGTTTAAAGTCAATT	A	-15	0
Dmel	2R	8935525	ATGGAGAATTCATTGA	A	-15	3
Dmel	2R	8936037	CCCCCACCCCTCCACCC	C	-16	2
Dmel	2R	8936585	A	AAA	2	NA
Dmel	2R	8937322	GTTTCGTCAAAATG	G	-13	2
Dmel	2R	8937432	CTTTCGTCATTCTGAC	C	-15	1
Dmel	2R	8941447	AA	A	-1	NA
Dmel	2R	8942518	T	TCCATACT	7	NA
Dmel	2R	8942577	AA	T	-1	NA
Dmel	2R	8967755	CCAACGCTTTG	C	-10	0
Dmel	2R	8967792	TT	T	-1	NA
Dmel	2R	8970242	T	TT	1	NA
Dmel	2R	8974558	GCTGAGTGGC	AAA	-7	NA
Dmel	2R	8985953	G	GA	1	NA
Dmel	2R	8992465	C	ATCAATAAGGACGTGCCTGT	19	NA
Dmel	2R	8992580	CTATT	AC	-3	NA
Dmel	2R	8992597	A	AGCCACCT	7	NA
Dmel	2R	8994991	C	CCCCCGC	6	NA
Dmel	2R	8995420	ACACATTAATATTCTT	A	-15	0
Dmel	2R	8996277	A	ACTGCGAAATTATT	13	NA
Dmel	2R	9016932	TCCCGCCATATCAGT	T	-14	2
Dmel	2R	9016994	CGAC	C	-3	NA
Dmel	2R	9055963	TTTGGCG	AA	-5	NA
Dmel	2R	9058642	C	CC	1	NA
Dmel	2R	9123400	TAA	T	-2	NA
Dmel	2R	9123404	GAG	G	-2	NA
Dmel	2R	9131385	ATTTTTTGATAAAATCCTTTTTCTAT	A	-25	0
Dmel	2R	9133262	CCGTC	C	-4	NA
Dmel	2R	9133503	TATCAAATATATTT	T	-13	2
Dmel	2R	9133916	TA	C	-1	NA
Dmel	2R	9139297	G	GAGTACAACAGTACAAAGG	18	NA
Dmel	2R	9146062	GT	G	-1	NA
Dmel	2R	9183773	A	AA	1	NA
Dmel	2R	9184412	T	TTGCAGGCGTTAAGATAGTGTTTCGCT	26	NA
Dmel	2R	9184497	TT	T	-1	NA
Dmel	2R	9184613	C	CC	1	NA
Dmel	2R	9186199	GCTCT	G	-4	NA
Dmel	2R	9186261	T	TT	1	NA
Dmel	2R	9190164	AATTCTTC	T	-7	NA
Dmel	2R	9205527	CGCACAC	C	-6	NA
Dmel	2R	9206919	ACTTTAGTAAGCTTTTTGGCAAA	C	-22	1
Dmel	2R	9209372	GGTG	T	-3	NA
Dmel	2R	9209793	T	TTGCAGCTT	8	NA
Dmel	2R	9212317	TATGAGT	T	-6	NA
Dmel	2R	9214435	T	CCA	2	NA
Dmel	2R	9215312	T	TA	1	NA
Dmel	2R	9215740	A	AA	1	NA
Dmel	2R	9216613	ATTTCAG	A	-6	NA
Dmel	2R	9216666	AA	A	-1	NA
Dmel	2R	9216725	G	GAG	2	NA
Dmel	2R	9250676	T	TT	1	NA
Dmel	2R	9253581	TCCTCT	T	-5	NA
Dmel	2R	9255380	T	TA	1	NA
Dmel	2R	9255387	T	TT	1	NA
Dmel	2R	9255399	TA	T	-1	NA
Dmel	2R	9255433	TACTTCATTC	T	-9	1
Dmel	2R	9256596	TTT	T	-2	NA
Dmel	2R	9257213	TAGA	C	-3	NA
Dmel	2R	9257315	CGTACTCT	C	-7	NA
Dmel	2R	9257336	A	AGA	2	NA
Dmel	2R	9262130	AGG	A	-2	NA
Dmel	2R	9263128	T	TCA	2	NA
Dmel	2R	9268372	A	AC	1	NA
Dmel	2R	9269620	CGCCCCCTCCTCTCACACAC	C	-19	2
Dmel	2R	9270341	CTGTA	C	-4	NA
Dmel	2R	9270349	T	TGC	2	NA
Dmel	2R	9271458	C	CAG	2	NA
Dmel	2R	9274929	G	AATTT	4	NA
Dmel	2R	9275875	CCAA	T	-3	NA
Dmel	2R	9287031	TCA	T	-2	NA
Dmel	2R	9288065	ATCCAGAA	A	-7	NA
Dmel	2R	9288086	GC	TACA	2	NA
Dmel	2R	9291773	ATA	A	-2	NA
Dmel	2R	9382458	GCAG	G	-3	NA
Dmel	2R	9393553	TACC	A	-3	NA
Dmel	2R	9421908	CATCCGCAACGAACTGAA	C	-17	2
Dmel	2R	9422726	TCATATGCTC	T	-9	0
Dmel	2R	9424796	CCTCTTC	C	-6	NA
Dmel	2R	9435679	TTTAT	T	-4	NA
Dmel	2R	9445804	T	CTG	2	NA
Dmel	2R	9448565	AA	G	-1	NA
Dmel	2R	9448949	CGAG	C	-3	NA
Dmel	2R	9450052	TTTTCGTT	T	-7	NA
Dmel	2R	9450395	TCTCAGAGTCCT	AA	-10	NA
Dmel	2R	9455931	A	AGGAAACGA	8	NA
Dmel	2R	9455944	T	CAA	2	NA
Dmel	2R	9456830	T	TTT	2	NA
Dmel	2R	9456843	AATAG	A	-4	NA
Dmel	2R	9456917	T	TT	1	NA
Dmel	2R	9456959	CTACGTAA	C	-7	NA
Dmel	2R	9458013	GCAACA	T	-5	NA
Dmel	2R	9458031	AG	A	-1	NA
Dmel	2R	9462101	TAAAT	T	-4	NA
Dmel	2R	9462193	T	TTTT	3	NA
Dmel	2R	9462197	T	TTATATTT	7	NA
Dmel	2R	9462212	A	AC	1	NA
Dmel	2R	9462219	A	AA	1	NA
Dmel	2R	9480897	AA	A	-1	NA
Dmel	2R	9486693	G	TC	1	NA
Dmel	2R	9486768	CA	C	-1	NA
Dmel	2R	9487191	AGATTTGTAGGTGTGCTCAAGC	A	-21	0
Dmel	2R	9487534	AC	A	-1	NA
Dmel	2R	9488736	ACATA	A	-4	NA
Dmel	2R	9490537	G	AAACA	4	NA
Dmel	2R	9494622	AG	A	-1	NA
Dmel	2R	9495845	TACGCCCGCGAGGCGC	T	-15	0
Dmel	2R	9501862	T	TGTAT	4	NA
Dmel	2R	9638043	TT	T	-1	NA
Dmel	2R	9639043	TCT	T	-2	NA
Dmel	2R	9641137	T	TC	1	NA
Dmel	2R	9647323	T	TGATCT	5	NA
Dmel	2R	9647326	G	GTTA	3	NA
Dmel	2R	9649170	T	TG	1	NA
Dmel	2R	9649218	G	GG	1	NA
Dmel	2R	9650737	A	AG	1	NA
Dmel	2R	9650806	ACATACACACACA	A	-12	5
Dmel	2R	9654839	TT	T	-1	NA
Dmel	2R	9656082	GG	T	-1	NA
Dmel	2R	9657064	C	CT	1	NA
Dmel	2R	9657079	ATTTCCAT	C	-7	NA
Dmel	2R	9677887	TCCTTAGTATGAAGTACCTCATTA	T	-23	0
Dmel	2R	9677947	TTAGTAAAGT	T	-9	2
Dmel	2R	9677985	AG	A	-1	NA
Dmel	2R	9677990	AC	A	-1	NA
Dmel	2R	9678283	A	TCAG	3	NA
Dmel	2R	9693211	T	ATAATACA	7	NA
Dmel	2R	9693220	TCA	AT	-1	NA
Dmel	2R	9723863	T	TT	1	NA
Dmel	2R	9727158	TAATCAGAAAAAGCTGCAAGCAGCGTAACGTTTGTT	T	-35	3
Dmel	2R	9746272	TAGAGAT	T	-6	NA
Dmel	2R	9746404	CTT	C	-2	NA
Dmel	2R	9829990	TAAAATAGTAGAGATT	G	-15	1
Dmel	2R	9855673	ATTCATA	A	-6	NA
Dmel	2R	9855681	AATTTCATACAATTT	A	-14	0
Dmel	2R	9855699	TTC	T	-2	NA
Dmel	2R	9855705	A	AGTG	3	NA
Dmel	2R	10028647	T	TTA	2	NA
Dmel	2R	10028660	T	TC	1	NA
Dmel	2R	10028668	TCTGCGCTATG	T	-10	1
Dmel	2R	10030400	CA	TTATTTAT	6	NA
Dmel	2R	10034494	CCTACATATATGC	C	-12	3
Dmel	2R	10035101	TCGTGATTA	T	-8	0
Dmel	2R	10070765	GG	G	-1	NA
Dmel	2R	10104290	CG	TATAAAATAATATACATTAAAATA	22	NA
Dmel	2R	10104309	C	CCTTAAA	6	NA
Dmel	2R	10104321	AA	A	-1	NA
Dmel	2R	10104326	T	TGAA	3	NA
Dmel	2R	10104341	T	TA	1	NA
Dmel	2R	10104355	T	TC	1	NA
Dmel	2R	10104364	CAC	G	-2	NA
Dmel	2R	10104377	T	TT	1	NA
Dmel	2R	10104583	AA	A	-1	NA
Dmel	2R	10104852	GAGG	G	-3	NA
Dmel	2R	10104916	TATTTAGTTGGGGCATATT	T	-18	1
Dmel	2R	10106404	CTTCAAGTGCTC	C	-11	3
Dmel	2R	10107233	AA	A	-1	NA
Dmel	2R	10155846	A	ATTCA	4	NA
Dmel	2R	10190281	T	TT	1	NA
Dmel	2R	10273738	ACA	A	-2	NA
Dmel	2R	10280689	CCACACA	TTTCAAGATT	3	NA
Dmel	2R	10289455	AG	A	-1	NA
Dmel	2R	10291591	TGTATCAA	T	-7	NA
Dmel	2R	10301900	AAACATTGCAA	A	-10	3
Dmel	2R	10314501	ACAATT	A	-5	NA
Dmel	2R	10321419	TTTTCATGTAGATCT	T	-14	1
Dmel	2R	10321611	TTCGGT	T	-5	NA
Dmel	2R	10354385	A	ATGA	3	NA
Dmel	2R	10367742	T	TTACTCGT	7	NA
Dmel	2R	10368432	TTTGTTA	T	-6	NA
Dmel	2R	10407363	T	AA	1	NA
Dmel	2R	10412793	G	GG	1	NA
Dmel	2R	10494546	CTTTAAGATTTCGCC	C	-14	1
Dmel	2R	10512084	AAA	A	-2	NA
Dmel	2R	10516174	AA	A	-1	NA
Dmel	2R	10516971	CTC	C	-2	NA
Dmel	2R	10517205	A	AAAA	3	NA
Dmel	2R	10523774	AG	A	-1	NA
Dmel	2R	10524623	A	TG	1	NA
Dmel	2R	10527361	ACTAATAATACCCCT	A	-14	0
Dmel	2R	10527395	AACATATATATAAAAG	A	-15	0
Dmel	2R	10528951	TATTTATT	T	-7	NA
Dmel	2R	10529019	TATTACGTTTAAT	T	-12	3
Dmel	2R	10532161	AAA	A	-2	NA
Dmel	2R	10532218	T	TTTT	3	NA
Dmel	2R	10532224	G	GGGTTTAACA	9	NA
Dmel	2R	10532234	T	TA	1	NA
Dmel	2R	10532472	A	AAA	2	NA
Dmel	2R	10536183	GA	G	-1	NA
Dmel	2R	10540081	T	TC	1	NA
Dmel	2R	10540700	T	TTAATAT	6	NA
Dmel	2R	10543163	ATTTAAA	A	-6	NA
Dmel	2R	10546701	T	TATGTGTGT	8	NA
Dmel	2R	10547258	GCAACTTTGTG	G	-10	2
Dmel	2R	10547395	G	CA	1	NA
Dmel	2R	10548314	A	AA	1	NA
Dmel	2R	10548416	G	TTC	2	NA
Dmel	2R	10554891	CTGTTAAC	C	-7	NA
Dmel	2R	10603114	TCT	T	-2	NA
Dmel	2R	10606529	T	TA	1	NA
Dmel	2R	10609377	ATTT	A	-3	NA
Dmel	2R	10610538	AA	A	-1	NA
Dmel	2R	10610549	TCTAAATGT	T	-8	1
Dmel	2R	10612198	TA	G	-1	NA
Dmel	2R	10614191	G	AT	1	NA
Dmel	2R	10614194	T	TATAA	4	NA
Dmel	2R	10614994	CCA	C	-2	NA
Dmel	2R	10617299	C	CT	1	NA
Dmel	2R	10617303	A	AA	1	NA
Dmel	2R	10617517	ATCACACTTCCTAGGTATAATATTAAAAGTAA	A	-31	3
Dmel	2R	10618405	ACAAAGTTA	A	-8	1
Dmel	2R	10619099	G	TAACGT	5	NA
Dmel	2R	10619196	TC	T	-1	NA
Dmel	2R	10624775	A	AAA	2	NA
Dmel	2R	10633258	AA	A	-1	NA
Dmel	2R	10697472	A	TGT	2	NA
Dmel	2R	10697859	G	GCATATATAGGTTTGTAATA	19	NA
Dmel	2R	10700408	ATACATCTATTAATTCTATAAT	A	-21	0
Dmel	2R	10701652	AACA	A	-3	NA
Dmel	2R	10701777	TC	A	-1	NA
Dmel	2R	10702962	GCAGG	G	-4	NA
Dmel	2R	10702986	T	TGA	2	NA
Dmel	2R	10703064	CA	TTT	1	NA
Dmel	2R	10704599	GTGGCA	G	-5	NA
Dmel	2R	10712841	CCATTCGCTTTCTGTTC	C	-16	5
Dmel	2R	10714064	T	TTCAA	4	NA
Dmel	2R	10718082	CACC	C	-3	NA
Dmel	2R	10718514	A	AA	1	NA
Dmel	2R	10720187	TCT	T	-2	NA
Dmel	2R	10724524	G	GTATATTG	7	NA
Dmel	2R	10725372	G	AA	1	NA
Dmel	2R	10742589	TCATCTAGCTTAATTTGTAAATCGGGATAAAATTAAATTT	T	-39	2
Dmel	2R	10742816	G	GCA	2	NA
Dmel	2R	10816065	A	AAACGCTG	7	NA
Dmel	2R	10816072	GTTTGC	G	-5	NA
Dmel	2R	10816269	ATTTTGATATATATGATTT	A	-18	0
Dmel	2R	10883086	GCC	G	-2	NA
Dmel	2R	10889087	T	TC	1	NA
Dmel	2R	10892579	T	TGT	2	NA
Dmel	2R	10897097	TCGCTATAATATACATAT	T	-17	5
Dmel	2R	10929746	ACATTTCACTTTG	A	-12	0
Dmel	2R	10932385	T	TC	1	NA
Dmel	2R	10938855	AT	A	-1	NA
Dmel	2R	10939676	T	TT	1	NA
Dmel	2R	10954513	TA	T	-1	NA
Dmel	2R	10954568	CTA	T	-2	NA
Dmel	2R	10955161	C	CC	1	NA
Dmel	2R	10993394	TACAAT	T	-5	NA
Dmel	2R	10993805	G	GTTCTTGT	7	NA
Dmel	2R	11002453	TACC	T	-3	NA
Dmel	2R	11002552	GT	A	-1	NA
Dmel	2R	11038722	GT	G	-1	NA
Dmel	2R	11038853	T	TAAAT	4	NA
Dmel	2R	11038875	TTATATCTCA	G	-9	2
Dmel	2R	11038938	T	TTAAGTCA	7	NA
Dmel	2R	11038967	CACATAATTAGCTCTGCAATTGTACTAC	C	-27	3
Dmel	2R	11040444	AGT	G	-2	NA
Dmel	2R	11079541	GTGGAGACGCCATATCCTG	G	-18	1
Dmel	2R	11132468	A	AA	1	NA
Dmel	2R	11227379	ATAAA	A	-4	NA
Dmel	2R	11227819	AAC	A	-2	NA
Dmel	2R	11277200	CT	TGGCAC	4	NA
Dmel	2R	11277241	T	TTGTAT	5	NA
Dmel	2R	11277256	T	TGCTCTGAAC	9	NA
Dmel	2R	11277313	A	ACTG	3	NA
Dmel	2R	11279346	A	CAT	2	NA
Dmel	2R	11359527	AGA	A	-2	NA
Dmel	2R	11372415	G	GTCTTCG	6	NA
Dmel	2R	11373135	A	AGCATT	5	NA
Dmel	2R	11373253	A	AAAAAATTAAAATTAAAAAAATTCGAATTTTAATACAAATAGATACATTTTTTTAATTCCCTAGTCTT	67	NA
Dmel	2R	11385223	ATAC	T	-3	NA
Dmel	2R	11396242	TCGCGGAT	T	-7	NA
Dmel	2R	11439258	TAAATT	T	-5	NA
Dmel	2R	11464693	ACGCGAA	A	-6	NA
Dmel	2R	11464706	GA	G	-1	NA
Dmel	2R	11467370	A	AAGTGAA	6	NA
Dmel	2R	11470560	GAAAAGAATATAGATG	G	-15	2
Dmel	2R	11470635	TGG	T	-2	NA
Dmel	2R	11480671	TATAGCCTGCGGCTT	T	-14	1
Dmel	2R	11486445	A	ATAA	3	NA
Dmel	2R	11487126	G	GTG	2	NA
Dmel	2R	11487461	AC	A	-1	NA
Dmel	2R	11496600	TT	C	-1	NA
Dmel	2R	11601881	GCCAAATTATAGAG	G	-13	4
Dmel	2R	11605812	TT	T	-1	NA
Dmel	2R	11609408	AGGCTGCC	GT	-6	NA
Dmel	2R	11610476	ACCTATTAAGAATACAAATCAAAAATTGATCCCGAAAATTTCATTTTACTTTACTTTA	A	-57	1
Dmel	2R	11612100	GAATTTTCTGACTTC	G	-14	0
Dmel	2R	11612256	G	ATAAAAATAAAGTATTAGTAA	20	NA
Dmel	2R	11612601	AA	A	-1	NA
Dmel	2R	11613335	A	AAGTTATTG	8	NA
Dmel	2R	11745170	G	GACCAAGCGGATG	12	NA
Dmel	2R	11751641	C	CC	1	NA
Dmel	2R	11809788	AT	A	-1	NA
Dmel	2R	11809861	TTTATAACT	T	-8	4
Dmel	2R	11829978	G	GCGTGAAG	7	NA
Dmel	2R	11830197	C	CGC	2	NA
Dmel	2R	11918467	G	GC	1	NA
Dmel	2R	11949033	GA	G	-1	NA
Dmel	2R	11952145	TAC	T	-2	NA
Dmel	2R	11956925	AGTAA	A	-4	NA
Dmel	2R	12030495	CG	T	-1	NA
Dmel	2R	12037304	ATGA	A	-3	NA
Dmel	2R	12090486	A	ACCA	3	NA
Dmel	2R	12090500	T	TT	1	NA
Dmel	2R	12090530	G	GG	1	NA
Dmel	2R	12123335	T	TT	1	NA
Dmel	2R	12123516	GTATG	G	-4	NA
Dmel	2R	12128386	TT	G	-1	NA
Dmel	2R	12148158	GCTTAGAGTAAA	TTGATAT	-5	NA
Dmel	2R	12166680	T	TTAAGTGGCTAT	11	NA
Dmel	2R	12166694	A	AA	1	NA
Dmel	2R	12166934	CGAATATCTTAAATATGATATTCCTTTGCTCTC	C	-32	1
Dmel	2R	12237581	A	AGAAAG	5	NA
Dmel	2R	12238947	C	CT	1	NA
Dmel	2R	12243082	A	ATATAAG	6	NA
Dmel	2R	12246252	CTTA	C	-3	NA
Dmel	2R	12255932	TGACATAT	T	-7	NA
Dmel	2R	12256352	CA	C	-1	NA
Dmel	2R	12257767	A	AAAACGA	6	NA
Dmel	2R	12257775	A	ATGC	3	NA
Dmel	2R	12259295	A	ATA	2	NA
Dmel	2R	12319383	ACGAGCAATA	A	-9	1
Dmel	2R	12319506	CAACC	C	-4	NA
Dmel	2R	12319569	T	TTATA	4	NA
Dmel	2R	12319570	C	ATCAA	4	NA
Dmel	2R	12327961	TATATACATCACAAA	C	-14	0
[truncated: 151,792 more rows]

## Sheet: b. DGRP pseudogenes
Supplementary file 16. Polymorphic indels in D. melanogaster and D. simulans populations. We listed the position and sizes of polymorphic indels from D. melanogaster and D. simulans populations. We also inferred the potential microhomologies causing the deletions.
Species	chromsome	position	ref	var	indel	Length of microhomology
Dmel	2L	3171049	TG	T	-1	NA
Dmel	2L	3171541	ATGGTTC	A	-6	NA
Dmel	2L	3172755	TT	T	-1	1
Dmel	2L	3694115	GACTTAGTTAT	C	-10	2
Dmel	2L	3694185	TAACGCAT	T	-7	2
Dmel	2L	3694202	TT	T	-1	1
Dmel	2L	4891362	A	ATA	2	NA
Dmel	2L	4891498	G	GGG	2	NA
Dmel	2L	4891769	CAC	C	-2	2
Dmel	2L	4891826	GC	G	-1	NA
Dmel	2L	4891830	AA	A	-1	1
Dmel	2L	5242739	T	TAATTG	5	NA
Dmel	2L	5242761	CTCC	C	-3	3
Dmel	2L	5243884	TCGAAATCAAAT	G	-11	5
Dmel	2L	5243912	TTCGCAGCT	T	-8	2
Dmel	2L	5243932	GAG	G	-2	2
Dmel	2L	5244127	CCATAC	C	-5	2
Dmel	2L	5244135	TAAATAAGTTT	T	-10	2
Dmel	2L	6972251	CTGGGAGTGC	C	-9	2
Dmel	2L	6972693	G	GAGG	3	NA
Dmel	2L	7839768	TTGTAGATTGAAGTACTTTTGATTTAAATGTT	T	-31	3
Dmel	2L	7839816	TATAC	T	-4	3
Dmel	2L	7840284	TGAAG	T	-4	2
Dmel	2L	7840331	A	AATAATATA	8	NA
Dmel	2L	7840336	C	CTCA	3	NA
Dmel	2L	9787287	TT	T	-1	1
Dmel	2L	9787301	AA	A	-1	1
Dmel	2L	9788297	CT	C	-1	NA
Dmel	2L	9788363	AA	A	-1	1
Dmel	2L	9788956	C	CA	1	NA
Dmel	2L	9789158	AA	A	-1	1
Dmel	2L	9789331	AA	A	-1	1
Dmel	2L	9789521	ATTCGCCGA	A	-8	2
Dmel	2L	9790651	CT	C	-1	NA
Dmel	2L	9790661	ATG	A	-2	NA
Dmel	2L	9790674	GG	G	-1	1
Dmel	2L	12453735	CAAGACC	C	-6	5
Dmel	2L	12453982	G	GG	1	NA
Dmel	2L	12454014	CA	T	-1	1
Dmel	2L	12454109	GCGATGAGCAA	G	-10	NA
Dmel	2L	12454492	CTAGTGAGTAGTGAAATGGATGTGGAACATGGCGAACAGATCGCC	C	-44	2
Dmel	2L	12454538	CCTGCA	C	-5	NA
Dmel	2L	12454933	CCCTCCCAAATCATATTGA	C	-18	NA
Dmel	2L	14746928	T	TG	1	NA
Dmel	2L	14781752	TG	T	-1	NA
Dmel	2L	14781928	C	CGGC	3	NA
Dmel	2L	14782454	AAAATGCAGA	A	-9	2
Dmel	2L	14782470	TAAT	T	-3	1
Dmel	2L	14782568	TGGCTTTTCTAGT	T	-12	1
Dmel	2L	14782622	T	AA	1	NA
Dmel	2L	14782701	T	TT	1	NA
Dmel	2L	14782742	AA	A	-1	1
Dmel	2L	14782822	GTACCAGTCCTGCAATG	G	-16	1
Dmel	2L	14782869	A	ACATA	4	NA
Dmel	2L	15128910	CTGGCGTGGCACCAGGTGAACCGCTGAG	T	-27	NA
Dmel	2L	15836857	ATATCGATTAGGATCGCTTTAGAGGGGA	A	-27	1
Dmel	2L	15837184	CCACATTGTTGTGTCGCACAATCTTCCTGATGGAAAC	C	-36	1
Dmel	2L	15887945	ATA	A	-2	2
Dmel	2L	15888219	CCG	C	-2	NA
Dmel	2L	15888226	GTTT	G	-3	NA
Dmel	2L	15888232	AC	A	-1	NA
Dmel	2L	15888538	GGAATG	G	-5	3
Dmel	2L	16699949	T	TTATATT	6	NA
Dmel	2L	16699965	T	TGTAT	4	NA
Dmel	2L	16700597	T	TAT	2	NA
Dmel	2L	16700781	C	CTG	2	NA
Dmel	2L	16700783	G	GAT	2	NA
Dmel	2L	16701079	A	AA	1	NA
Dmel	2L	16701308	TT	T	-1	1
Dmel	2L	16701506	GCCAGTGTGTATCCTGGCATGCACCTG	G	-26	1
Dmel	2L	16701567	TGCGTACAT	T	-8	2
Dmel	2L	16701805	GT	G	-1	NA
Dmel	2L	16701942	AA	A	-1	1
Dmel	2L	16701965	AAACAAGA	TTT	-5	NA
Dmel	2L	16702132	CTTCTTC	C	-6	2
Dmel	2L	16702168	TACA	T	-3	NA
Dmel	2L	16702518	TT	T	-1	1
Dmel	2L	16702596	TGATTTT	T	-6	3
Dmel	2L	16728073	A	ATTAATTAATTTTCA	14	NA
Dmel	2L	16728253	CC	C	-1	1
Dmel	2L	16728304	AGAACTCGCA	A	-9	3
Dmel	2L	16728485	A	AAGGGCATACGAGTTGGGACACTCCGGA	27	NA
Dmel	2L	16728486	C	CGGGCATACGAGTTGGAATACTCATGAC	27	NA
Dmel	2L	16728684	A	ATTCC	4	NA
Dmel	2L	16728685	AGGTATAATCTATAGGAG	A	-17	NA
Dmel	2L	16728767	CTA	C	-2	1
Dmel	2L	16728859	TTTTGGCGCCG	T	-10	7
Dmel	2L	16728911	CAGGGTCAT	A	-8	2
Dmel	2L	16729577	AA	A	-1	1
Dmel	2L	16729596	AAA	A	-2	1
Dmel	2L	17175835	TT	T	-1	1
Dmel	2L	17175985	A	TACTTG	5	NA
Dmel	2L	17176001	C	CTTC	3	NA
Dmel	2L	17176316	AAACGCCCTGGGCTGTG	A	-16	NA
Dmel	2L	17176336	AGTATAGAATAT	G	-11	NA
Dmel	2L	17176370	CTTC	C	-3	3
Dmel	2L	18665142	AA	A	-1	1
Dmel	2L	18665276	A	AGTATTTT	7	NA
Dmel	2L	18665283	A	ACTTA	4	NA
Dmel	2L	18665321	TT	T	-1	1
Dmel	2L	18665328	T	TAAGTGTGTT	9	NA
Dmel	2L	18665346	TGT	T	-2	2
Dmel	2L	18665526	C	CGGATGGAGC	9	NA
Dmel	2L	18665877	A	AGTCAATCAT	9	NA
Dmel	2L	18665931	A	ATCCTTCCAAAAAAATCCAAAAA	22	NA
Dmel	2L	18665933	ATGTTAT	A	-6	NA
Dmel	2L	18666173	TT	T	-1	1
Dmel	2L	18666189	AA	A	-1	1
Dmel	2L	18666686	T	TA	1	NA
Dmel	2L	19075101	GGTCCATCCCGATGCTGATCTAGTGACTCCGAGCTGATCCAGACTGGTCCAGACAGATCCAGACTGGATTCGCAGGTCTCCTCGCCGGATGATTCGGCGTCTGTGAAGATCGATATTGATTGCTGCTCCTGGAACAACCCATCAAGGTTTCTTCGGTACCGGGAAGTTGGGCAAAACCTGGTGGAATACGTCGTAGCGATCCCGGAAGTCGTCACTCACTTCCTCCGGACGACGCTCCTGTTTCTGGAGT	CACATGA	-243	NA
Dmel	2L	19075382	GGTT	C	-3	1
Dmel	2L	19075387	C	CAGATTGC	7	NA
Dmel	2L	19740887	GTCTTA	G	-5	3
Dmel	2L	19740934	TGTAAT	T	-5	1
Dmel	2L	19741178	GA	G	-1	NA
Dmel	2L	19741428	TT	T	-1	1
Dmel	2L	19741641	CTGGAC	C	-5	4
Dmel	2L	19741656	G	TGAC	3	NA
Dmel	2L	19741661	C	CTTTTAC	6	NA
Dmel	2L	19741775	GAATTAA	T	-6	NA
Dmel	2L	19742256	AG	C	-1	1
Dmel	2L	19742399	G	GG	1	NA
Dmel	2L	19742408	A	TTACTGTTCAAAACACCAG	18	NA
Dmel	2L	19742415	G	GCTCTTTTCCTCTTTAATAGGGAGG	24	NA
Dmel	2L	20639094	TA	T	-1	NA
Dmel	2L	20639101	C	CCC	2	NA
Dmel	2L	20639305	AAAATA	A	-5	1
Dmel	2L	20639378	TCCCTAGCCAGC	T	-11	NA
Dmel	2L	20639485	GA	G	-1	NA
Dmel	2L	20862580	AGG	TT	-1	NA
Dmel	2L	20862626	TGC	T	-2	NA
Dmel	2L	20862630	GA	G	-1	NA
Dmel	2L	20862634	ATT	A	-2	1
Dmel	2L	20862642	AAT	A	-2	NA
Dmel	2L	20862649	TC	T	-1	NA
Dmel	2L	20862654	GCGTT	G	-4	NA
Dmel	2L	20862676	G	GG	1	NA
Dmel	2L	20862775	GTTGTGGAAA	G	-9	3
Dmel	2L	20863528	C	CTTAC	4	NA
Dmel	2L	20863630	G	GGGTCG	5	NA
Dmel	2L	20863714	CTGAAGGCGACGTAGCGAGTTCCCCTTGGGCCCCAGGATCT	C	-40	2
Dmel	2L	20901187	C	CCCAC	4	NA
Dmel	2L	20901239	GA	G	-1	NA
Dmel	2L	20924392	G	GAATG	4	NA
Dmel	2L	21282954	TT	T	-1	1
Dmel	2L	21283358	ATTTT	A	-4	1
Dmel	2L	21283817	TTCCA	T	-4	NA
Dmel	2L	21283963	A	AAA	2	NA
Dmel	2L	21283989	GAGA	G	-3	2
Dmel	2L	21284083	AA	A	-1	1
Dmel	2L	21405848	AG	T	-1	NA
Dmel	2L	21405851	GAAGC	G	-4	NA
Dmel	2L	21539228	CACGGCATCACGAATTACGTTCTC	C	-23	2
Dmel	2L	21539458	T	ACGC	3	NA
Dmel	2L	21540926	T	TTC	2	NA
Dmel	2L	21542866	AA	A	-1	1
Dmel	2L	21543492	CTGCCGTTGGGGCTGCTGAC	C	-19	2
Dmel	2L	21543550	G	GTGAAA	5	NA
Dmel	2L	21543581	AATGCC	A	-5	1
Dmel	2L	21543670	AGTAGCGAAAGCGTCAA	A	-16	1
Dmel	2L	21577350	A	ACTAGGC	6	NA
Dmel	2L	21577518	ACGCA	A	-4	1
Dmel	2L	21577530	GCCATTTCTAGG	G	-11	3
Dmel	2L	21589873	TGATATTCGTCTCACTCTCCAT	T	-21	2
Dmel	2L	22067117	CTACGCCATC	C	-9	3
Dmel	2L	22226481	AC	A	-1	NA
Dmel	2L	22226642	C	CC	1	NA
Dmel	2L	22226684	A	ATGTGCTACATA	11	NA
Dmel	2L	22226705	AA	A	-1	1
Dmel	X	370938	T	TCAATATATTTACATT	15	NA
Dmel	X	370979	T	TA	1	NA
Dmel	X	371540	T	TT	1	NA
Dmel	X	371586	T	TGAGTGTCTAACCCT	14	NA
Dmel	X	372223	T	AATACAGAGCTCCAG	14	NA
Dmel	X	372670	G	GAG	2	NA
Dmel	X	372869	CCC	GA	-1	NA
Dmel	X	372902	CTCT	C	-3	3
Dmel	X	373043	G	GA	1	NA
Dmel	X	374813	GAG	G	-2	2
Dmel	X	6174541	T	TG	1	NA
Dmel	X	6174595	T	TTTGGTCTGCAATTAAACGTTAGCAGGG	27	NA
Dmel	X	6255726	A	AACGCGATGTAAAATA	15	NA
Dmel	X	6255774	A	AA	1	NA
Dmel	X	6256062	TGTT	T	-3	1
Dmel	X	6256162	GTCTAAG	G	-6	4
Dmel	X	6257104	A	AA	1	NA
Dmel	X	6844812	A	AATGGCCTTGCAATGGCCAGCAGCTCCAGCAACTTGGCTAACGCTACTGCA	50	NA
Dmel	X	6845013	CGCCATC	C	-6	1
Dmel	X	6845024	CCGCCAAA	G	-7	NA
Dmel	X	6845189	C	CCCACCAGTT	9	NA
Dmel	X	6845201	T	TCATCT	5	NA
Dmel	X	6846545	T	TTGGCACCAGGGTGCT	15	NA
Dmel	X	6846753	G	GGCCTCTCGAAGCGGAATCTCCTCGATGATTTCGACA	36	NA
Dmel	X	6846830	A	TAC	2	NA
Dmel	X	7794633	TT	T	-1	1
Dmel	X	7794653	ATATATTATC	A	-9	NA
Dmel	X	7794665	AAGAC	A	-4	NA
Dmel	X	7794670	TGATCC	T	-5	NA
Dmel	X	7794677	GGTT	G	-3	1
Dmel	X	7795066	A	AA	1	NA
Dmel	X	7795317	AA	A	-1	1
Dmel	X	9154810	CT	A	-1	1
Dmel	X	15470539	GAAAATG	G	-6	1
Dmel	X	15470954	A	AGGAGGACGATGGCAGTAAGGAGTGGGCTTACCAATTGTGATACGATTTCTTTGATTTGGCAGAGCAGCCCAATCCGACGACTTA	84	NA
Dmel	X	15690860	AGAATGTTGTGCAGT	A	-14	NA
Dmel	X	19812227	AGTTACAT	A	-7	2
Dmel	X	19838265	CTGAAAAG	C	-7	1
Dmel	X	19838288	CT	C	-1	1
Dmel	X	20073184	AG	A	-1	1
Dmel	X	20096427	TC	T	-1	NA
Dmel	X	20096429	TTA	T	-2	NA
Dmel	X	20096433	A	AT	1	NA
Dmel	X	20254958	GTTAGACTGATTGTCCATCCACTGATTG	G	-27	3
Dmel	X	21026843	ACACCAATCAAACCA	A	-14	2
Dmel	X	21026983	TT	GGG	1	NA
Dmel	X	21027358	A	AAC	2	NA
Dmel	X	21027359	A	ACAAAC	5	NA
Dmel	X	21102367	TTT	T	-2	2
Dmel	3L	2171657	A	AC	1	NA
Dmel	3L	2172042	T	TT	1	NA
Dmel	3L	2172572	TC	T	-1	NA
Dmel	3L	9506970	ACACACCGTGTTTTTGAAATGAAAGCG	A	-26	NA
Dmel	3L	9507016	CA	T	-1	NA
Dmel	3L	16594111	C	CTTGC	4	NA
Dmel	3L	16594266	CAT	C	-2	NA
Dmel	3L	16594456	AGACTTAG	A	-7	2
Dmel	3L	16595780	C	CA	1	NA
Dmel	3L	17862756	ACGTACC	A	-6	1
Dmel	3L	17862765	AG	A	-1	NA
Dmel	3L	17862768	ATATAAAGAAGTTAATT	A	-16	NA
Dmel	3L	17862785	CTAAACT	C	-6	NA
Dmel	3L	17863396	GACACTGA	G	-7	2
Dmel	3L	17867992	A	AA	1	NA
Dmel	3L	17868021	AT	A	-1	1
Dmel	3L	17868051	GTTG	G	-3	4
Dmel	3L	17868148	AAGCTAGCGTTAAG	A	-13	NA
Dmel	3L	17868162	T	TCCCAA	5	NA
Dmel	3L	17868295	GTATGAACGCTATAC	G	-14	3
Dmel	3L	17868757	A	AT	1	NA
Dmel	3L	17878546	CTGC	C	-3	2
Dmel	3L	17878613	CC	C	-1	1
Dmel	3L	17878623	G	GCAAAGACACTATTCTATTATTCTAGTGTCTTTGGTAGCAG	40	NA
Dmel	3L	18067704	AA	T	-1	1
Dmel	3L	18067857	CTGATTTC	C	-7	1
Dmel	3L	18067875	AA	A	-1	1
Dmel	3L	18068116	TGGGGCAC	T	-7	NA
Dmel	3L	18068131	ATT	A	-2	NA
Dmel	3L	18068134	CTCCG	C	-4	1
Dmel	3L	19417991	TCTCCATTGGTTT	T	-12	2
Dmel	3L	20338571	AA	A	-1	1
Dmel	3L	20338760	AGACTTGAGTCTGTATTCCCAAGCTTGAA	A	-28	3
Dmel	3L	20972249	GCCTCG	G	-5	2
Dmel	3L	24527520	TAATT	T	-4	2
Dmel	3L	24527755	G	GACGGTCCTAATG	12	NA
Dmel	3L	24527839	CGG	T	-2	NA
Dmel	3L	24528120	GTGGTGG	G	-6	5
Dmel	3L	24528133	AGACGGTGGTCCGCGCGG	A	-17	NA
Dmel	4	26978	T	TT	1	NA
Dmel	4	26979	A	TT	1	NA
Dmel	4	27818	TG	T	-1	NA
Dmel	4	27889	TA	T	-1	1
Dmel	4	28460	C	CTTA	3	NA
Dmel	4	32193	C	CAAA	3	NA
Dmel	4	35172	TA	T	-1	NA
Dmel	4	35404	AA	A	-1	1
Dmel	4	35426	CAAAAAT	C	-6	6
Dmel	4	36668	CC	C	-1	1
Dmel	4	37946	CAT	C	-2	2
Dmel	4	37976	A	GTT	2	NA
Dmel	4	37983	AAGA	A	-3	1
Dmel	4	39645	G	GG	1	NA
Dmel	4	40120	ACATA	A	-4	2
Dmel	4	40169	TCCATC	T	-5	NA
Dmel	4	40924	GT	G	-1	NA
Dmel	4	44029	C	CTCT	3	NA
Dmel	4	49492	TAAAACA	T	-6	3
Dmel	4	51944	CT	C	-1	NA
Dmel	4	52092	CTCCGAACT	C	-8	2
Dmel	4	52164	T	TCCGATGA	7	NA
Dmel	4	52165	GGGGGAGTAGCACA	G	-13	NA
Dmel	4	52237	CG	C	-1	1
Dmel	4	863985	GGGGCTG	G	-6	2
Dmel	4	864429	AAACATATATATTCATATTCTTGATTAGTCA	GG	-29	NA
Dmel	4	926243	ATAAGCAATAAATAGTGCAGATTTTCGCTA	A	-29	1
Dmel	4	927617	CTAAGACCTAAACAAAGACAAC	C	-21	1
Dmel	2R	617959	CTTCCGCAAAA	C	-10	1
Dmel	2R	618304	GCGCGG	G	-5	1
Dmel	2R	619508	TAAATGGTAAGGGTAACATATTTAAATTGAT	T	-30	2
Dmel	2R	668651	T	TGATTTCTTTTAACATAGAC	19	NA
Dmel	2R	668816	GTTGAACCTCTCTCTTG	G	-16	3
Dmel	2R	668909	GCAG	G	-3	4
Dmel	2R	669427	C	CTTTCAAAGGTAATTTTACAAAATGT	25	NA
Dmel	2R	670516	C	CGGC	3	NA
Dmel	2R	670613	C	CAGCTTCTTTTTTACC	15	NA
Dmel	2R	670898	AGTCTGATGGTCGTGGAATTTTGCTTGTAACA	A	-31	3
Dmel	2R	670976	CAATTTTATAGTTCTTACAGTTAAGC	C	-25	4
Dmel	2R	969736	CC	C	-1	1
Dmel	2R	2887904	C	CCA	2	NA
Dmel	2R	2927079	AATTTAATCAGA	A	-11	4
Dmel	2R	2927209	AA	A	-1	1
Dmel	2R	4320392	T	TTGT	3	NA
Dmel	2R	4320407	A	AAAA	3	NA
Dmel	2R	4320513	GAACGCCTTCGG	G	-11	2
Dmel	2R	4320792	GG	G	-1	1
Dmel	2R	4320803	T	TAT	2	NA
Dmel	2R	4457153	CTAGCCCTC	C	-8	1
Dmel	2R	4457209	GG	G	-1	1
Dmel	2R	4457415	CTGATACCTGTGCACAGTGTTCACTACGATCCGCACTTATATCCACATCCAAAA	C	-53	NA
Dmel	2R	4457749	ATCTAATAACGCTTAGCCA	A	-18	1
Dmel	2R	6264127	AATTG	A	-4	NA
Dmel	2R	6264140	TCTC	CG	-2	NA
Dmel	2R	6264194	AACA	A	-3	1
Dmel	2R	6264400	A	AT	1	NA
Dmel	2R	6264435	TCAAATGTCTCGAGTTGATCGTCTGCCCAGTTATGGGTAGATCTGGGTCCTTTATGGGTCCTTTCGATGAT	T	-70	1
Dmel	2R	6264508	CCAT	A	-3	NA
Dmel	2R	6264551	A	ACC	2	NA
Dmel	2R	6264556	T	TG	1	NA
Dmel	2R	6264580	TAA	GG	-1	NA
Dmel	2R	6264586	GCAT	G	-3	NA
Dmel	2R	6264678	GC	G	-1	NA
Dmel	2R	6264733	AGGG	A	-3	NA
Dmel	2R	6264783	A	ACGA	3	NA
Dmel	2R	6264999	GCTGCA	G	-5	NA
Dmel	2R	6265008	CTTGTC	C	-5	1
Dmel	2R	7133945	TT	T	-1	1
Dmel	2R	7586678	GACCCAAAAGCTTCG	G	-14	1
Dmel	2R	7586853	GGCAAACAGAAAACAAA	G	-16	NA
Dmel	2R	7586941	T	TGGGGAAACATCACATAGGCGTAGTTCTGATCGAAATTATTT	41	NA
Dmel	2R	7587386	TA	T	-1	NA
Dmel	2R	7587395	AA	A	-1	1
Dmel	2R	7587492	ACA	A	-2	2
Dmel	2R	7587560	AAA	A	-2	2
Dmel	2R	7754461	AACTTAAGCCTCCAA	A	-14	2
Dmel	2R	7754491	A	AT	1	NA
Dmel	2R	7754760	T	TATTAAGTGTTACAGCTGCTCCGAGGGCTAT	30	NA
Dmel	2R	7754771	GCAATGAAAAT	G	-10	2
Dmel	2R	7754842	GACTTTCGG	G	-8	2
Dmel	2R	7754950	TGGTGTACTACCA	T	-12	1
Dmel	2R	8251386	T	GAATCA	5	NA
Dmel	2R	8251389	T	TTGC	3	NA
Dmel	2R	8251441	ATGA	A	-3	1
Dmel	2R	8251711	TTTCTC	T	-5	NA
Dmel	2R	8252004	TTATATGGT	T	-8	4
Dmel	2R	8252015	T	TAT	2	NA
Dmel	2R	8252023	A	TAT	2	NA
Dmel	2R	8252033	T	TAT	2	NA
Dmel	2R	8252270	AGCC	A	-3	NA
Dmel	2R	8253115	CAT	C	-2	1
Dmel	2R	10248047	CAGAC	G	-4	1
Dmel	2R	10248093	ATGT	A	-3	NA
Dmel	2R	10248265	AA	A	-1	1
Dmel	2R	10248293	CCGCCAT	C	-6	NA
Dmel	2R	10248326	TGC	AT	-1	NA
Dmel	2R	10248331	ATAACCGATCTT	A	-11	NA
Dmel	2R	10248402	AGT	A	-2	NA
Dmel	2R	10248435	ATT	A	-2	NA
Dmel	2R	10248516	CGAGG	T	-4	NA
Dmel	2R	10248576	GGC	A	-2	NA
Dmel	2R	10248723	AG	A	-1	NA
Dmel	2R	10248785	GG	G	-1	1
Dmel	2R	10248790	TTG	AA	-1	NA
Dmel	2R	10248794	TGT	A	-2	1
Dmel	2R	10248881	ACTGC	A	-4	NA
Dmel	2R	10248888	TAGGTG	T	-5	NA
Dmel	2R	10249135	CGA	C	-2	NA
Dmel	2R	10249139	GGTG	A	-3	1
Dmel	2R	10249148	GGGG	G	-3	1
Dmel	2R	10249180	AGT	A	-2	NA
Dmel	2R	10249186	TG	T	-1	NA
Dmel	2R	11092562	G	GCTGGATG	7	NA
Dmel	2R	11092564	AGTTCAT	A	-6	NA
Dmel	2R	11261564	CCC	C	-2	3
Dmel	2R	11261641	AGCTC	A	-4	NA
Dmel	2R	11261739	TAAAGA	T	-5	NA
Dmel	2R	11261828	TTCCACGCT	T	-8	1
Dmel	2R	11261839	G	GCCGGTTC	7	NA
Dmel	2R	11262010	G	GG	1	NA
Dmel	2R	11262492	AAAAATAGTTAGAACTTAC	A	-18	NA
Dmel	2R	11263355	ATATTTATTTATTTAACGTAGTTCAACATCTAATTTAGTCTAAAAATTACACATTTGAACTCTAAGAATC	A	-69	NA
Dmel	2R	11263648	AGTATTATATTGCGCAAAAA	A	-19	2
Dmel	2R	11263865	C	CTGT	3	NA
Dmel	2R	11263866	CAGACAGCAATTCAAATAA	C	-18	NA
Dmel	2R	13023200	CCTTTTAA	TG	-6	NA
Dmel	2R	13023288	ATTGCAAATAAACAAAAC	A	-17	NA
Dmel	2R	13023306	C	CGGA	3	NA
Dmel	2R	13023762	T	TGT	2	NA
Dmel	2R	13023767	TA	T	-1	NA
Dmel	2R	13023793	ACG	A	-2	1
Dmel	2R	14060590	AAAG	A	-3	2
Dmel	2R	14289410	GCACGGAAATATTGGCTG	G	-17	1
Dmel	2R	14289658	TACGATACTAATCAGTGA	T	-17	NA
Dmel	2R	14289677	TTGGATGCCA	T	-9	NA
Dmel	2R	14290253	GG	G	-1	1
Dmel	2R	15540023	T	TT	1	NA
Dmel	2R	15540143	T	TACATCATTAAATGTCCTTCCA	21	NA
Dmel	2R	15540194	TT	T	-1	1
Dmel	2R	20406576	T	GGAA	3	NA
Dmel	2R	20408913	GCA	TT	-1	NA
Dmel	2R	20409222	C	CTGGTTTGG	8	NA
Dmel	2R	20409223	GCCCTATC	G	-7	NA
Dmel	3R	12845	ATTCTTTGCA	A	-9	3
Dmel	3R	13768	T	TA	1	NA
Dmel	3R	15261	TT	T	-1	1
Dmel	3R	15356	ATGAATCC	A	-7	NA
Dmel	3R	15364	A	AAAAAAAAAAATTCCTTTT	18	NA
Dmel	3R	16840	TT	T	-1	1
Dmel	3R	18813	TATCTACATTGCTACGCCACAAGGCTAGTCAATAAAC	A	-36	NA
Dmel	3R	19531	A	ACAGTATAATTCGCTTAGCTGCATCGATAGTTAGCTGCATCGGCAAGATATCTGCATTATTTTTCCATTTTTTTGTGTGAATTTATTTTTCCTTAAAAAAAAAAAATTAAGTTAGCTGCATTTTTAAGTTACCTGCATCGAGGCATTGTGCAAAGTACTCGAGGCAGCTAAGCGAATTATACTGTA	185	NA
Dmel	3R	19532	TT	T	-1	1
Dmel	3R	20062	A	AAGTTAACACAATCACAAAACACCCGAAATTTATA	34	NA
Dmel	3R	20165	TTTGGGGT	T	-7	2
Dmel	3R	69355	A	AAGTTAACGCAAGTTGCACTTGCATCAGGGTTCTCGGCACTCGCTGCCGCATACCTCACCTTGATATGACAACCAACATGCTGTGGTTCTCCAAATAATAGTCAAGATAGTTAAGAGGGTTCGAGTTTACGATTAGCTTTATTTTAAGATTCAGTTCGCGATCTGCTAGCGGTTCCGTTATGTGTCCGTTCGAGACTGGGGCCTCTTCTCCCGCCCCGCTGCTTTTATATCCGCTTCCCCCGTTGACCCCTCACCCTGAGTGCGACCAACGGCACTTGTTCCGAATGCACACATACACAAACATGTTCCTAGACAGGCCCCGAGTCGCCTGCTGACGGGGCCCGAAAACACGAGAGCCGAGCGCTGGTGAGTCCTGACGAAGAGCGCAAGAAGAGGGTT…	409	NA
Dmel	3R	70211	CTTCGGCAAAGGAAACC	C	-16	1
Dmel	3R	70843	A	ATCG	3	NA
Dmel	3R	70981	TTCT	T	-3	2
Dmel	3R	1076656	GGAAAGTAGAGCACTGACCGGAAAGCTGAAAAAATAAAGCTCTTCAGAGAAATAGAGTAG	G	-59	2
Dmel	3R	1076739	C	CTC	2	NA
Dmel	3R	1076812	CAGCCAC	C	-6	1
Dmel	3R	1077398	ATAC	A	-3	NA
Dmel	3R	1094843	TTAGGATTAAT	T	-10	2
Dmel	3R	1674855	GTAGACT	G	-6	1
Dmel	3R	1674958	AAACACTTATATGAGTCTTAA	A	-20	3
Dmel	3R	1675248	GG	G	-1	1
Dmel	3R	1853675	AACGG	T	-4	2
Dmel	3R	1853967	CCGAAAATGGAGAGTGTCGCTGGGACCGCA	C	-29	NA
Dmel	3R	2010751	T	TC	1	NA
Dmel	3R	2010755	T	TTAAGGCATTCATTAGGTACCGTTATCATT	29	NA
Dmel	3R	3352066	GTATACACAGTCAAAGCTGAGAGTTACTCG	G	-29	3
Dmel	3R	3352304	G	GCGGAGCACCGCC	12	NA
Dmel	3R	3353502	TT	T	-1	1
Dmel	3R	3353576	C	CAGATTGGCTTACGCTCAGGCACCGACTTATTTTTACCGCTTCGACTTCGATTCGCC	56	NA
Dmel	3R	3353602	AACTG	A	-4	NA
Dmel	3R	3353775	CGCT	GA	-2	NA
Dmel	3R	4086545	CACCTATCAATTTATCGTAG	T	-19	1
Dmel	3R	4087439	GCGA	G	-3	NA
Dmel	3R	4087608	CT	C	-1	NA
Dmel	3R	5079386	T	TGCCGTTAAGCCTAGCGCCAC	20	NA
Dmel	3R	5079387	G	GCCATTAAGCCTAGCGCCACG	20	NA
Dmel	3R	5887425	GCT	G	-2	NA
Dmel	3R	5887433	T	TC	1	NA
Dmel	3R	5887438	GTTGAG	G	-5	1
Dmel	3R	5887457	TCTTG	T	-4	NA
Dmel	3R	5887490	T	TTG	2	NA
Dmel	3R	5887796	GG	G	-1	1
Dmel	3R	5887846	CACC	C	-3	2
Dmel	3R	8222868	CAGCATGTTTATCATGTCGGGACGTACAATATTGTGCTCCTGTCGGTATTTCATAGCATC	C	-59	4
Dmel	3R	8223001	TAACATTAAGTTTAAAAGAATATATTCTT	T	-28	2
Dmel	3R	8223192	GTCGAGGCGATCACATCGTTGGTGAATCGTGTGCAGTAGTCCTTCATGTCCAGTTCATTCTCCTGAACCCTTGAATCATCCTGCTTAAGACAGTCCACGGCCTCCTTGGCCACCTGGTTCATCAGCTGGAACATCTGACGCATTTTG	G	-146	2
Dmel	3R	8223394	G	GGAGAA	5	NA
Dmel	3R	8223404	CAGCGAGC	C	-7	1
Dmel	3R	8223505	TTATCTG	A	-6	NA
Dmel	3R	8223533	GACCATTAAAAGTGG	G	-14	2
Dmel	3R	8223587	A	AA	1	NA
Dmel	3R	8223607	AGCTTTTTGTGAGTC	A	-14	NA
Dmel	3R	8223791	GTA	G	-2	NA
Dmel	3R	8223796	T	TA	1	NA
Dmel	3R	8224291	ATA	GC	-1	NA
Dmel	3R	8224327	GCAAGTA	G	-6	NA
Dmel	3R	8224389	AACTTGCCA	A	-8	1
Dmel	3R	8224405	CTTTG	C	-4	NA
Dmel	3R	8719695	T	TTAATTTTTT	9	NA
Dmel	3R	8719700	C	AA	1	NA
Dmel	3R	8719876	C	CCTATA	5	NA
Dmel	3R	8719923	T	TC	1	NA
Dmel	3R	8720123	GTGAGC	G	-5	NA
Dmel	3R	8720243	CCGACACA	C	-7	NA
Dmel	3R	9979728	T	TTTGT	4	NA
Dmel	3R	9979791	ATGTGACTA	A	-8	2
Dmel	3R	9979807	C	CG	1	NA
Dmel	3R	9979873	ATTT	A	-3	NA
Dmel	3R	9979879	AC	A	-1	NA
Dmel	3R	9979895	TGCAAA	T	-5	NA
Dmel	3R	15212588	T	TTTTTTT	6	NA
Dmel	3R	15212809	CC	C	-1	1
Dmel	3R	15213253	ATCTCTGTAA	A	-9	3
Dmel	3R	16560791	AAAGACCCTTATTCTAGTGTCTTTGGAAGGACCA	A	-33	8
Dmel	3R	17042687	A	AA	1	NA
Dmel	3R	17042959	GA	T	-1	NA
Dmel	3R	17555280	TT	T	-1	1
Dmel	3R	17555289	GGCCAGCAG	A	-8	2
Dmel	3R	17555337	G	GCCCACCTTCACTTTGGTGCTGATG	24	NA
Dmel	3R	17555424	TGGGA	T	-4	NA
Dmel	3R	17555480	T	TAT	2	NA
Dmel	3R	17555504	A	ATGCTGCTTACCAACAACTCC	20	NA
Dmel	3R	17555507	T	TG	1	NA
Dmel	3R	17555510	A	TTTC	3	NA
Dmel	3R	17555511	A	ACTGATTTCA	9	NA
Dmel	3R	17555569	T	TTGTCAAATGAAAGAAAAACATTTAATTACATAAAGAAGCCGAC	43	NA
Dmel	3R	21093767	AAAG	A	-3	NA
Dmel	3R	21093784	AT	A	-1	NA
Dmel	3R	21093787	CT	G	-1	NA
Dmel	3R	21093827	A	AAGA	3	NA
Dmel	3R	21093843	TTC	T	-2	NA
Dmel	3R	21093898	GCTGG	T	-4	1
Dmel	3R	21093905	CAG	C	-2	NA
Dmel	3R	21093924	TGAG	T	-3	1
Dmel	3R	21093931	TGC	T	-2	NA
Dmel	3R	21093952	T	TGCCGGCTGCATTCCGACTTTGTTCGACTTTCAACAACAGTTCCGAGCTAGAGCTTTTTATGGTAGGTAGATTGCCATTAT	80	NA
Dmel	3R	26037359	CTAAC	C	-4	3
Dmel	3R	26037392	GG	G	-1	1
Dmel	3R	26037409	T	TACCCT	5	NA
Dmel	3R	26037474	A	AAGTT	4	NA
Dmel	3R	26038646	TT	T	-1	1
Dmel	3R	26038715	A	AGTTTAAAGCACTTATGTACATC	22	NA
Dmel	3R	26038773	TT	T	-1	1
Dmel	3R	26038862	TAGATCTCTACC	T	-11	4

## Sheet: c. heterochromatic pseudogenes
Supplementary file 16. Polymorphic indels in D. melanogaster and D. simulans populations. We listed the position and sizes of polymorphic indels from D. melanogaster and D. simulans populations. We also inferred the potential microhomologies causing the deletions.
Species	gene	position	indel size	mechanism (td:tandem duplication, sl:replication slippage)
dmel	FBgn0042701	332	-1
dmel	FBgn0042701	490	1
dmel	FBgn0051700	91	1
dmel	FBgn0051700	240	-2
dmel	FBgn0051700	283	-1	sl
dmel	FBgn0051700	370	2	sl
dmel	FBgn0051700	459	2
dmel	FBgn0051700	527	-1
dmel	FBgn0051700	575	2	sl
dmel	FBgn0058005	7	3
dmel	FBgn0058005	157	1	sl
dmel	FBgn0058005	193	2
dmel	FBgn0058005	229	1	sl
dmel	FBgn0058005	381	3	sl
dmel	FBgn0058005	449	1	sl
dmel	FBgn0058005	460	1	sl
dmel	FBgn0058005	460	3	sl
dmel	FBgn0058005	706	1	sl
dmel	FBgn0058005	706	3	sl
dmel	FBgn0058005	831	-1	sl
dmel	FBgn0058005	848	2	sl
dmel	FBgn0058005	848	5	sl
dmel	FBgn0058005	966	1	sl
dmel	FBgn0058005	967	-1	sl
dmel	FBgn0058005	1235	1	sl
dmel	FBgn0058005	1270	3
dmel	FBgn0058005	1423	-2	sl
dmel	FBgn0058068	359	14
dmel	FBgn0058100	445	1	sl
dmel	FBgn0058100	478	1
dmel	FBgn0084017	126	1	sl
dmel	FBgn0084017	126	2	sl
dmel	FBgn0084017	198	-2	sl
dmel	FBgn0084017	199	-1	sl
dmel	FBgn0084017	234	-1
dmel	FBgn0084017	380	-1
dmel	FBgn0084017	410	1	sl
dmel	FBgn0084017	410	2	sl
dmel	FBgn0084017	410	-1	sl
dmel	FBgn0084017	569	-3
dmel	FBgn0084017	793	1	sl
dmel	FBgn0084017	793	4	sl
dmel	FBgn0084017	1339	1	sl
dmel	FBgn0084017	1339	2	sl
dmel	FBgn0084017	1376	1	sl
dmel	FBgn0084017	1376	-1	sl
dmel	FBgn0084017	1399	-1
dmel	FBgn0084017	1404	1	sl
dmel	FBgn0084017	1443	1	sl
dmel	FBgn0084017	1443	-1	sl
dmel	FBgn0084017	1474	1	sl
dmel	FBgn0084017	1482	1
dmel	FBgn0084017	1486	-2
dmel	FBgn0084017	1487	-1	sl
dmel	FBgn0084017	1522	-1
dmel	FBgn0084017	1619	1
dmel	FBgn0085570	100	-1
dmel	FBgn0085570	146	1
dmel	FBgn0085570	146	2
dmel	FBgn0085570	153	-1
dmel	FBgn0085570	155	2
dmel	FBgn0085570	217	-1	sl
dmel	FBgn0085570	236	1	sl
dmel	FBgn0085570	381	-2
dmel	FBgn0085570	527	-1	sl
dmel	FBgn0085570	527	1	sl
dmel	FBgn0085570	703	1	sl
dmel	FBgn0085570	726	26
dmel	FBgn0085570	780	1
dmel	FBgn0085570	924	2	sl
dmel	FBgn0085570	924	-1	sl
dmel	FBgn0085570	977	-8
dmel	FBgn0085570	1005	-3
dmel	FBgn0085570	1152	-1
dmel	FBgn0085784	172	-2
dmel	FBgn0085784	372	2
dmel	FBgn0085804	156	-1
dmel	FBgn0085804	214	-1
dmel	FBgn0085804	248	-1
dmel	FBgn0085810	50	-1
dmel	FBgn0085810	175	-1
dmel	FBgn0085810	194	-1
dmel	FBgn0085810	195	2	sl
dmel	FBgn0085810	202	-1
dmel	FBgn0085810	225	-1
dmel	FBgn0085810	321	-1
dmel	FBgn0085810	344	1
dmel	FBgn0085810	372	1	sl
dmel	FBgn0085810	385	1	sl
dmel	FBgn0085810	408	-1
dmel	FBgn0085810	415	-1	sl
dmel	FBgn0085810	415	1	sl
dmel	FBgn0085810	426	3
dmel	FBgn0085810	426	-1	sl
dmel	FBgn0085810	566	1
dmel	FBgn0085810	566	2
dmel	FBgn0085810	566	-1
dmel	FBgn0085810	644	1
dmel	FBgn0085810	824	1	sl
dmel	FBgn0085810	917	1	sl
dmel	FBgn0085810	917	-1	sl
dmel	FBgn0085810	959	1
dmel	FBgn0085810	984	1	sl
dmel	FBgn0085810	984	2	sl
dmel	FBgn0085810	1045	1	sl
dmel	FBgn0085810	1045	-1	sl
dmel	FBgn0085810	1083	1	sl
dmel	FBgn0085810	1083	-1	sl
dmel	FBgn0085810	1099	2
dmel	FBgn0263091-2	298	1
dmel	FBgn0263092	201	-1
dmel	FBgn0286928	275	-1
dmel	FBgn0260469	29	-1
dmel	FBgn0260469	56	-1
dmel	FBgn0260469	56	-2
dmel	FBgn0260469	78	1
dmel	FBgn0260469	78	5
dmel	FBgn0260469	153	-1
dmel	FBgn0260469	155	-1
dmel	FBgn0260469	174	-17
dmel	FBgn0260469	179	-1
dmel	FBgn0260469	230	-1
dmel	FBgn0260469	272	-1
dmel	FBgn0260469	306	-11
dmel	FBgn0260469	344	1
dmel	FBgn0260469	372	-1
dmel	FBgn0260469	374	2
dmel	FBgn0260469	433	1
dmel	FBgn0260469	471	1	sl
dmel	FBgn0260469	524	1
dmel	FBgn0260469	528	2
dmel	FBgn0260469	616	1
dmel	FBgn0260469	616	3
dmel	FBgn0260469	703	2
dmel	FBgn0260469	726	-1
dmel	FBgn0260469	764	-1
dmel	FBgn0260469	917	-1
dmel	FBgn0260469	927	-1
dmel	FBgn0260469	989	1
dmel	FBgn0260469	1023	-1
dmel	FBgn0260469	1122	-2
dmel	FBgn0260469	1123	-1
dmel	FBgn0260469	1157	1
dmel	FBgn0260469	1157	-2
dmel	FBgn0260469	1157	-1
dmel	FBgn0260469	1243	-2
dmel	FBgn0260469	1353	1	sl
dmel	FBgn0260469	1353	2	sl
dmel	FBgn0260469	1353	-1	sl
