# Supplementary material for: Unique structure and positive selection promote the rapid divergence of Drosophila Y chromosomes
Source: eLife. 2022 Jan 6;11:e75795. doi: 10.7554/eLife.75795 (PMC8794474; doi:10.7554/eLife.75795)
Supplement: Supplementary file 17. — We list the composition of LTR retrotransposon, LINE, DNA transposons, satellite, simple repeats, rRNA, and other repeats across every chromosome in our assemblies. [file elife-75795-supp17.xlsx]

## Sheet: Sheet1
Supplementary file 17. Repeat composition across chromosomes in D. melanogaster and the D. simulans clade. We list the composition of LTR retrotransposon, LINE, DNA transposons, satellite, simple repeats, rRNA, and other repeats across every chromosome in our assemblies.
	The propotion of transposon sequences in the genome
Dmel chromosome	LTR transposon base	LINE transposon base	DNA transposon base	Satellite base	Simple_repeat base	rRNA base	Other repetitive sequences base	Nonrepetitve base	Total bases
2L	0.0572425	0.0208265	0.0182842	0.00462005	0.0198264	0	0.000462634	0.878738	23539150
2R	0.139441	0.0622518	0.0316933	0.00693091	0.0216856	0	0.000345277	0.737653	25622898
3L	0.122067	0.052062	0.0244767	0.00567636	0.0220772	0	0.000347781	0.773293	28400042
3R	0.101661	0.0433926	0.0168817	0.00787802	0.0257879	0	0.00114921	0.80325	32867008
X	0.0714516	0.0390542	0.0176891	0.0135563	0.0432194	0.00325552	0.000648618	0.811125	24206862
4	0.0508258	0.0724911	0.191848	0	0.0332472	6.29869e-05	0.00366234	0.647862	1317735
Y	0.187811	0.0663311	0.0223945	0.00049105	0.663443	0.0101592	0.00373407	0.0557951	14603423	using 40 Mb for the proportion
All	0.139235	0.0621253	0.0265514	0.0146997	0.0309958	0.0106771	0.00413193	0.711583	155978719
Dmau chromosome
2L	0.0575347	0.0334715	0.0228888	0.00161085	0.0183995	1.15759e-05	0.000547287	0.865536	23928947
2R	0.0858613	0.0454707	0.0261097	0.00282519	0.0205403	0	0.000428744	0.818764	22878453
3L	0.0661857	0.0418337	0.021844	0.000882433	0.0211102	5.50163e-05	0.000547175	0.847542	25774197
3R	0.0224901	0.0112395	0.0103355	0.00239343	0.0232886	0	0.000386273	0.929867	28088977
X	0.0362627	0.017875	0.0167488	0.0332117	0.038573	5.53085e-05	0.000569616	0.856704	22745151
4	0.023225	0.0390456	0.180014	5.94013e-05	0.026196	7.05928e-05	0.00351156	0.727878	1161591
Y	0.274788	0.0946405	0.0155219	0.00621695	0.574767	0.0164811	0.00677427	0.0272919	17894069	using 40 Mb for the proportion
All	0.128514	0.0584973	0.021276	0.036923	0.0217441	0.011525	0.0044516	0.717069	153560261
Dsim chromosome
2L	0.0583936	0.0357514	0.0236593	0.00147999	0.0184079	0.000351651	0.000621781	0.861334	24214319
2R	0.0789657	0.0447959	0.0238951	0.00510337	0.0211538	0	0.000408916	0.825677	22620759
3L	0.0632231	0.040091	0.0225919	0.00253306	0.0225961	5.5285e-05	0.000528627	0.848381	25884059
3R	0.0403762	0.0166691	0.0130276	0.0132448	0.03185	0	0.000346631	0.884486	28494269
X	0.050217	0.0207319	0.0162028	0.0164729	0.0396127	0	0.000431115	0.856331	22910358
4	0.0227038	0.0358206	0.175029	0	0.0242395	6.99216e-05	0.00382152	0.738315	1158440
Y	0.221927	0.0738754	0.0115195	0.00109212	0.668068	0.000424575	0.00189513	0.0216226	13731056	using 40 Mb for the proportion
All	0.102969	0.0549222	0.0189837	0.0480596	0.0225942	0.00983165	0.00318883	0.739451	165500721
Dsech chromosome
2L	0.0745169	0.0356418	0.0212339	0.000684467	0.0198209	0	0.000707475	0.847395	24556333
2R	0.0942119	0.0467476	0.0201922	0.00294567	0.0220177	0	0.000414712	0.81347	22745894
3L	0.0917133	0.0574647	0.0215019	0.000777269	0.0224957	4.98588e-05	0.000483106	0.805514	27256977
3R	0.0582882	0.0301311	0.0155555	0.0023674	0.021592	0	0.000371674	0.871694	30228065
X	0.0187606	0.0188803	0.0159036	0.0404379	0.0375655	0.000439452	0.000534081	0.867479	22286862
4	0.0589497	0.0365037	0.165296	0.00193184	0.027772	0.00671399	0.00716792	0.695665	1222670
Y	0.225801	0.088629	0.0167599	0.00596345	0.641086	0.0062156	0.00119337	0.0205663	14965395	using 40 Mb for the proportion
All	0.131723	0.069582	0.0211982	0.0523628	0.0222185	0.00973974	0.00698383	0.686192	160928541
