# Supplementary material for: Unique structure and positive selection promote the rapid divergence of Drosophila Y chromosomes
Source: eLife. 2022 Jan 6;11:e75795. doi: 10.7554/eLife.75795 (PMC8794474; doi:10.7554/eLife.75795)
Supplement: Supplementary file 18. — We list the total sequence length from each transposon or complex repeat on Y-linked contigs/scaffolds and other contigs/scaffolds in our assemblies. [file elife-75795-supp18.xlsx]

## Sheet: Sheet1
Supplementary file 18. The detail of repetitive sequences across chromosomes in D. melanogaster and the D. simulans clade. We list the total sequence length from each transposon or complex repeat on Y-linked contigs/scaffolds and other contigs/scaffolds in our assemblies.
Contig	Type	Family	Sequences on dmel Y	Sequences on other chromosomes of Dmel	Enrichment on Y in Dmel (log2)	Sequences on Dmau Y	Sequences on other chromosomes of Dmau	Enrichment on Y in Dmau (log2)	Sequences on Dsim Y	Sequences on other chromosomes of Dsim	Enrichment on Y in Dsim (log2)	Sequences on Dsech Y	Sequences on other chromosomes of Dsech	Enrichment on Y in Dsech (log2)
diver base	LTR	Pao	25508	121578	-2.52759	50773	66546	-1.20829	115305	37176	-0.403171	0	85765	-16.3881
193xp_sat base	Satellite	Satellite	0	182	-7.5157	0	298939	-18.1895	0	238038	-17.8608	19287	296935	-4.03517
gypsy-1_dse base	LTR	Gypsy	0	40575	-15.3083	18911	93328	-2.56921	0	136882	-17.0626	13771	299286	-4.50662
gypsy-22_dya base	LTR	Gypsy	14138	17215	-1.14897	0	31023	-14.9211	9015	27980	-2.03681	17512	17767	-1.01042
copia-1_dse base	LTR	Copia	17733	14321	-0.854031	10888	19968	-1.50273	3343	25126	-3.0898	0	41460	-15.3395
doc6_dm base	Non-LTR_retrotransposon	Jockey	14692	55651	-2.2593	4220	53402	-3.77099	0	84612	-16.3686	0	69051	-16.0754
transpac base	LTR	Gypsy	5250	89176	-4.16854	5250	79247	-4.00825	0	53408	-15.7048	0	124478	-16.9255
gypsy-3_dse base	LTR	Gypsy	21	3825	-7.45009	7100	73515	-3.50497	0	36466	-15.1543	13191	160422	-3.71815
cr1-2_df base	Non-LTR_retrotransposon	CR1	104	5145	-5.64386	7554	4854	-0.715883	2409	9904	-2.35319	0	5807	-12.5038
helitron-5_drh base	RC	Helitron	0	430	-8.75154	198	278	-1.26122	0	971	-9.92481	36681	1209	-0.0467829
dmel_rdna_ets base	rDNA	rDNA	38958	122494	-2.05109	0	0	0	0	182	-7.5157	0	502	-8.97441
helitron-1_del base	RC	Helitron	0	0	0	0	35	-5.16993	0	684	-9.41996	13365	604	-0.0637642
gypsy-1_dvir base	LTR	Gypsy	0	1181	-10.207	219	3922	-4.23475	12258	733	-0.0837822	0	476	-8.89785
dmel_rdna_its1 base	rDNA	rDNA	38087	114660	-2.00375	0	0	0	0	286	-8.16491	0	101	-6.67243
dnarep2_dsim base	RC	Helitron	103	6581	-6.00627	36403	30565	-0.879396	1521	39105	-4.7384	162	84713	-9.02434
r2_dse base	Non-LTR_retrotransposon	R2	0	0	0	81445	111365	-1.24327	0	439	-8.78136	25190	124202	-2.56813
dmau_rdna_its2 base	rDNA	rDNA	0	0	0	30733	53346	-1.45193	0	185	-7.53916	5511	1919	-0.43098
90u_sat base	Satellite	Satellite	19350	72180	-2.24185	200164	194617	-0.979866	1927	300153	-7.29169	167090	290238	-1.4526
dsim_rdna_28s_rdna base	rDNA	rDNA	4729	373	-0.109505	317868	547266	-1.44449	7290	785035	-6.76383	50349	21885	-0.520706
r2_dsi base	Non-LTR_retrotransposon	R2	0	4114	-12.0067	30752	5552	-0.239441	3958	330922	-6.40237	8356	8248	-0.990561
r1_dm base	Non-LTR_retrotransposon	R1	69220	605547	-3.28511	1602	11488	-3.02973	52	18727	-8.46899	3459	28889	-3.22488
invader5 base	LTR	Gypsy	2395	13350	-2.71629	159	9917	-5.97685	8060	2561	-0.398025	3698	9322	-1.81563
dsim_rdna_5_8s_rdna base	rDNA	rDNA	7303	19001	-1.84858	10086	16973	-1.42366	246	24981	-6.67437	4309	20180	-2.50643
dsim_rdna_18s_rdna base	rDNA	rDNA	0	418	-8.71081	171324	276820	-1.38723	4250	406722	-6.5951	69536	324116	-2.50107
r1_dsi base	Non-LTR_retrotransposon	R1	1884	34219	-4.25952	134302	415706	-2.03396	4365	424125	-6.61681	101130	419623	-2.36438
chouto base	LTR	Gypsy	0	83046	-16.3416	20853	23918	-1.10227	21894	27950	-1.18685	1410	61409	-5.47643
jockey-1_dse base	Non-LTR_retrotransposon	Jockey	19733	18120	-0.939762	61313	216011	-2.17729	15073	436750	-4.90563	4230	558311	-7.05482
gypsy-7_dvir base	LTR	Gypsy	17317	35570	-1.61067	323	484	-1.31836	82	79	-0.964811	0	36	-5.20945
gypsy-7_dsim base	LTR	Gypsy	1330	23855	-4.24204	21449	28243	-1.21206	1372	74937	-5.79647	2755	35402	-3.79134
gypsy-7_del base	LTR	Gypsy	2044	721	-0.4357	10484	2358	-0.292655	731	314	-0.514967	2643	43279	-4.11842
dsech_rdna_28s_rdna base	rDNA	rDNA	0	0	0	0	0	0	0	0	0	58802	637696	-3.56616
stalker2 base	LTR	Gypsy	29429	95787	-2.08907	78282	86099	-1.07028	15581	11516	-0.798306	2864	47943	-4.14845
r1_dse base	Non-LTR_retrotransposon	R1	3476	18500	-2.66008	7155	10747	-1.32298	198	5510	-4.8424	51454	498434	-3.41776
gypsy-4_dbi base	LTR	Gypsy	2553	71891	-4.86534	1743	40293	-4.59119	27886	30880	-1.07541	6648	41438	-2.85444
nts_dm base	Other	IGS	148135	439603	-1.98825	269074	347005	-1.19511	74557	390422	-2.64073	46103	1008110	-4.51513
r1_dya base	Non-LTR_retrotransposon	R1	1234	11700	-3.3887	2992	12998	-2.4176	514	14115	-4.82821	5755	12432	-1.65985
hmsbeagle base	LTR	Gypsy	1292	161235	-6.97382	10326	183921	-4.23341	67347	108297	-1.38296	8068	135020	-4.14838
dm176 base	LTR	Gypsy	260931	304160	-1.11481	15626	17541	-1.08575	2659	16490	-2.84785	1246	23452	-4.30792
gypsy-5_dsim base	LTR	Gypsy	19826	29250	-1.30758	8120	125800	-4.04358	28853	36743	-1.18486	63626	109682	-1.44564
tabor base	LTR	Gypsy	42266	64494	-1.33678	30685	43002	-1.26385	20699	64039	-2.0334	6102	110378	-4.25443
dsech_rdna_ets base	rDNA	rDNA	174	209	-1.13375	8911	1196	-0.181676	151	0	0	24479	142550	-2.77043
gypsy-4_dse base	LTR	Gypsy	18175	25973	-1.28035	6941	9196	-1.21704	274	2942	-3.54821	23386	13114	-0.642229
i_dm base	Non-LTR_retrotransposon	I	0	219882	-17.7464	38832	248064	-2.88518	4585	184029	-5.36206	3936	192393	-5.64004
gypsy9_dya base	LTR	Gypsy	23669	48476	-1.60786	12394	6611	-0.616697	982	5947	-2.81759	1542	15844	-3.4942
pifo base	LTR	Gypsy	1239	44693	-5.21112	3513	3591	-1.01572	4878	5833	-1.13457	589	6949	-3.67559
dsech_rdna_its1 base	rDNA	rDNA	0	0	0	327	0	0	0	0	0	22596	111212	-2.56597
transib1 base	DNA	CMC-Transib	498	14494	-4.90911	2242	41957	-4.30054	5130	43954	-3.25797	28660	56571	-1.57231
gypsy-8_dbi base	LTR	Gypsy	9081	3364	-0.4546	10571	19853	-1.52501	9020	8212	-0.933815	2051	22066	-3.55501
g6_dm base	Non-LTR_retrotransposon	Jockey	18615	43743	-1.74405	9113	11000	-1.14204	2266	24041	-3.53665	7511	13771	-1.50243
hat-1_dsi base	DNA	hAT-Ac	0	6997	-12.7727	52232	28849	-0.63442	18065	19443	-1.05396	5637	36176	-2.89073
gypsy-3_dki base	LTR	Gypsy	17188	92329	-2.67161	47689	20300	-0.511636	17048	32011	-1.52486	9191	59177	-2.89489
gypsy20_dya base	LTR	Gypsy	21501	61160	-1.94275	3033	28087	-3.3586	13032	26406	-1.59745	20506	25031	-1.15095
gypsy-5_dki base	LTR	Gypsy	0	10569	-13.3677	37028	5605	-0.203349	9880	29993	-2.01272	9874	40952	-2.36374
hat-2_dse base	DNA	hAT-Ac	0	4397	-12.1026	1714	16170	-3.38247	10553	16144	-1.33894	1921	14268	-3.07442
jockey-4_dsim base	Non-LTR_retrotransposon	Jockey	0	234	-7.87652	39404	15983	-0.491195	4795	14530	-2.01064	3243	16852	-2.63106
jockey-3_dm base	Non-LTR_retrotransposon	Jockey	168788	131644	-0.831822	119901	184939	-1.3462	40252	228015	-2.73651	212891	111446	-0.607376
gypsy-29_dya base	LTR	Gypsy	11662	7386	-0.707776	7035	4942	-0.76756	1337	4418	-2.10499	1375	8692	-2.87122
bel-3_dfi base	LTR	Pao	3799	14304	-2.25224	2771	13481	-2.55171	2542	983	-0.471501	5450	7130	-1.20665
gypsy8 base	LTR	Gypsy	1858	26624	-3.9375	65623	66464	-1.0092	6363	47762	-3.08832	29510	79629	-1.88686
bs2 base	Non-LTR_retrotransposon	Jockey	44752	201057	-2.45749	24036	309668	-3.79524	6224	251247	-5.3702	5644	285598	-5.68911
gypsy-24_dya base	LTR	Gypsy	5950	43845	-3.06483	17990	37789	-1.63247	41598	36006	-0.899601	8397	52640	-2.86159
copia1_dm base	LTR	Copia	8469	76919	-3.33362	54521	55341	-1.0108	6707	45451	-2.95896	39736	127303	-2.07164
roo base	LTR	Pao	191657	1259431	-2.92053	8982	297341	-5.09172	26940	416944	-4.04231	23252	183715	-3.15392
gypsy12 base	LTR	Gypsy	961657	198800	-0.271098	504768	217152	-0.516218	29276	119676	-2.34702	86055	251581	-1.97213
gypsy-2_dper base	LTR	Gypsy	0	10500	-13.3582	36175	15831	-0.523673	13665	15797	-1.10831	2097	9000	-2.40321
jockey-1_der base	Non-LTR_retrotransposon	Jockey	16728	89474	-2.6664	10025	20195	-1.59181	3784	23691	-2.85981	22384	23338	-1.03039
ninja base	LTR	Pao	142374	136692	-0.970916	86661	52789	-0.686287	16658	75623	-2.46975	52886	135447	-1.83231
dmau_rdna_ets base	rDNA	rDNA	0	1736	-10.7624	62116	120034	-1.55207	0	0	0	0	0	0
gypsy2_dm base	LTR	Gypsy	115711	122720	-1.04304	5785	18583	-2.07441	32752	20178	-0.692486	6839	28307	-2.36133
gypsy-16_drh base	LTR	Gypsy	4031	16913	-2.37704	12812	6413	-0.58545	64614	3776	-0.0819374	4020	9982	-1.80011
burdock base	LTR	Gypsy	0	130754	-16.9965	18347	90885	-2.57371	11632	107816	-3.3601	44294	90926	-1.6101
gypsy-12_dfi base	LTR	Gypsy	1313	8317	-2.87372	17039	3413	-0.263387	12242	8864	-0.785764	2374	6853	-1.95809
circe base	LTR	Gypsy	36808	102101	-1.91602	55723	34118	-0.689091	34780	37617	-1.05765	9946	40411	-2.33989
helitron-1_dyak base	RC	Helitron	126	6560	-5.71846	1379	7877	-2.74588	6642	7705	-1.11094	3678	6951	-1.53076
dmau_rdna_its1 base	rDNA	rDNA	0	0	0	53212	94193	-1.46994	0	0	0	135	200	-1.30485
g5a_dm base	Non-LTR_retrotransposon	Jockey	13092	59215	-2.46536	10060	25176	-1.80832	6317	40687	-2.89527	7881	74174	-3.37998
mariner2_dm base	DNA	TcMar-Tc1	2484	23856	-3.40599	5080	7995	-1.36374	1820	9356	-2.61773	1353	8486	-2.86143
zam base	LTR	Gypsy	64291	70429	-1.06726	66182	39159	-0.670548	14121	38783	-1.90546	246333	92973	-0.461975
gypsy8_dya base	LTR	Gypsy	5467	5081	-0.948021	41118	23746	-0.657635	21580	2928	-0.18355	23262	52176	-1.69727
gypsy-24_dbp base	LTR	Gypsy	1328	6188	-2.49982	11730	1798	-0.205729	15027	1589	-0.145007	8827	16249	-1.50621
bel1_dv base	LTR	Pao	5209	14301	-1.90493	2954	18521	-2.8615	2005	6318	-2.05296	6481	9764	-1.32557
gypsy base	LTR	Gypsy	104535	187284	-1.48108	220104	126275	-0.654164	57401	104864	-1.49919	51837	182466	-2.1763
gypsy12_dya base	LTR	Gypsy	825	30118	-5.22737	9074	12245	-1.23224	1591	8721	-2.69555	2417	9693	-2.32443
invader4 base	LTR	Gypsy	22087	45446	-1.61235	346	5684	-4.11939	558	5050	-3.32682	1776	9083	-2.61151
tv1i base	LTR	Gypsy	1294	388	-0.378083	7777	897	-0.157465	665	709	-1.04584	1229	2525	-1.61015
fw3_dm base	Non-LTR_retrotransposon	Jockey	1860	22828	-3.72972	8649	15033	-1.45308	4387	15672	-2.19269	2330	15173	-2.90866
gypsy_6b base	LTR	Gypsy	61061	166405	-1.89731	17297	36227	-1.62961	55643	26282	-0.558095	16731	47300	-1.93618
gypsy-7_dse base	LTR	Gypsy	4198	19783	-2.51383	87459	12559	-0.193579	8286	16625	-1.58792	55699	73209	-1.2106
copia2_ltr_dm base	LTR	Copia	3103	11056	-2.18962	4331	3996	-0.942937	968	4030	-2.36707	1817	3187	-1.46102
dm1731 base	LTR	Copia	55699	82954	-1.31574	48156	65950	-1.24457	12507	29536	-1.74905	177863	53688	-0.380562
micropia base	LTR	Gypsy	106987	92214	-0.896783	211752	58593	-0.352425	155420	74120	-0.56257	64347	133845	-1.62294
mariner-1_dsim base	DNA	TcMar-Tc1	0	1632	-10.6733	13999	54024	-2.28062	7266	81452	-3.60981	4986	40090	-3.17615
gypsy-30_dwil base	LTR	Gypsy	40137	38442	-0.969193	19173	26701	-1.25856	3423	15304	-2.45144	19973	30678	-1.3425
gypsy-53_del base	LTR	Gypsy	14741	25983	-1.46598	11413	33155	-1.96524	23079	22546	-0.983213	3075	10777	-2.17107
blastopia base	LTR	Gypsy	10062	105609	-3.52291	19779	98214	-2.5766	39586	61273	-1.34926	45253	152619	-2.12846
gypsy12a base	LTR	Gypsy	2579	92972	-5.21084	5266	56448	-3.55057	1878	49339	-4.76861	4793	69912	-3.96192
rooa base	LTR	Pao	17794	137181	-3.1225	121019	173987	-1.2855	75883	180738	-1.75778	42438	198978	-2.50806
copia-2_dper base	LTR	Copia	0	15437	-13.9142	2927	8505	-1.96522	4238	3880	-0.937578	5243	4488	-0.892069
dmel_rdna_28s_rdna base	rDNA	rDNA	197096	630538	-2.07009	1859	328	-0.23431	294	173	-0.665794	2621	4422	-1.42573
gypsy3 base	LTR	Gypsy	0	46313	-15.4992	5163	3372	-0.725071	3218	1713	-0.61556	9974	22665	-1.71025
r2_dm base	Non-LTR_retrotransposon	R2	49522	156617	-2.05745	2952	6380	-1.66016	1440	6888	-2.53107	9395	14991	-1.37599
jockey-3_dvi base	Non-LTR_retrotransposon	Jockey	875	4561	-2.63381	3118	7564	-1.77616	1561	6733	-2.40885	4835	6582	-1.23942
fw_dm base	Non-LTR_retrotransposon	Jockey	201024	673157	-2.12056	208556	257926	-1.16138	194186	162983	-0.879164	148539	446494	-2.00212
invader6 base	LTR	Gypsy	19605	47060	-1.76566	22569	55802	-1.79593	40872	33503	-0.863689	31515	88371	-1.92752
rover_dm base	LTR	Gypsy	47904	132777	-1.9152	443	1014	-1.71536	1731	1468	-0.885633	1505	781	-0.602735
mdg3 base	LTR	Gypsy	120952	92574	-0.819972	26439	50994	-1.55024	61003	30294	-0.581679	19628	39653	-1.59461
gypsy-3_dsim base	LTR	Gypsy	1674	18666	-3.60216	27667	44537	-1.38388	10472	49872	-2.52656	28494	86547	-2.01338
harbinger1_dya base	DNA	PIF-Harbinger	768	12619	-4.12181	5359	12951	-1.77241	2550	11598	-2.47157	6739	10746	-1.37538
g5_dm base	Non-LTR_retrotransposon	Jockey	3914	98130	-4.70405	170197	125945	-0.79908	208693	110293	-0.612109	209261	434907	-1.62213
gypsy-23_dya base	LTR	Gypsy	4052	1369	-0.419835	30961	23446	-0.81332	26891	2114	-0.109174	6935	8592	-1.1627
doc5_dm base	Non-LTR_retrotransposon	Jockey	0	108173	-16.723	17107	51501	-2.00373	9714	45298	-2.50149	29928	51334	-1.44105
g_dm base	Non-LTR_retrotransposon	Jockey	8666	81523	-3.37936	848	10493	-3.73977	577	12967	-4.55055	947	10501	-3.59419
gypsy-38_dan base	LTR	Gypsy	18188	12473	-0.753386	2901	9768	-2.1263	3187	6712	-1.63478	3269	3782	-1.10874
helitron-2_df base	RC	Helitron	0	136	-7.09803	2039	1971	-0.975393	2770	2350	-0.886019	77956	3756	-0.067887
stalker4 base	LTR	Gypsy	283536	599962	-1.63969	223105	149831	-0.741203	178601	74887	-0.505175	68601	120244	-1.46089
gypsy-11_dsim base	LTR	Gypsy	2560	50782	-4.38052	201486	129082	-0.714265	111194	164320	-1.30904	104259	232902	-1.69326
g3_dm base	Non-LTR_retrotransposon	Jockey	4314	25929	-2.80922	3634	9325	-1.83404	5703	6282	-1.0713	7522	7075	-0.956391
gypsy1_dm base	LTR	Gypsy	4838	137928	-4.88281	14095	41139	-1.9703	13183	20736	-1.36335	21241	83521	-2.30214
heta base	Non-LTR_retrotransposon	Jockey	427997	152164	-0.438852	174510	11389	-0.0912088	162553	127075	-0.833287	267558	259125	-0.977081
transib2 base	DNA	CMC-Transib	18473	74202	-2.3267	22616	60779	-1.88257	37094	167228	-2.46155	66931	125458	-1.52327
jockey-10_df base	Non-LTR_retrotransposon	Jockey	0	64	-6.02237	11029	11057	-1.00176	7265	6305	-0.901294	9128	21937	-1.76681
gypsy5 base	LTR	Gypsy	68812	119785	-1.45456	31630	88394	-1.92392	35092	79662	-1.7093	20274	103929	-2.61494
jockey-1_dya base	Non-LTR_retrotransposon	Jockey	6681	22619	-2.1326	4422	23937	-2.68076	3040	22173	-3.05161	8644	28956	-2.12083
heta_dsi base	Non-LTR_retrotransposon	Jockey	13219	5909	-0.533039	255366	8179	-0.0454827	249688	228904	-0.938667	275850	174813	-0.708163
tahre base	Non-LTR_retrotransposon	Jockey	243215	103824	-0.512864	102592	1253	-0.0175133	94058	50425	-0.619272	110632	100062	-0.929374
gypsy-10_dsim base	LTR	Gypsy	8263	12394	-1.32179	24266	10452	-0.51673	44640	20865	-0.553258	5790	8773	-1.33052
gypsy13_dya base	LTR	Gypsy	299	5309	-4.22471	6723	6617	-0.988475	2195	4264	-1.55666	2376	6463	-1.8949
invader2 base	LTR	Gypsy	108333	194644	-1.48373	186787	107823	-0.65741	110046	40373	-0.450877	108570	158543	-1.29882
dm297 base	LTR	Gypsy	49783	489354	-3.4369	107837	145743	-1.23358	466368	160837	-0.427467	268389	314669	-1.11931
doc3_dm base	Non-LTR_retrotransposon	Jockey	10842	234638	-4.50078	121452	113795	-0.953784	76481	116483	-1.33515	64526	162213	-1.81306
gypsy-26_dya base	LTR	Gypsy	4899	96118	-4.36569	11931	86690	-3.04707	16667	61641	-2.2321	16421	104489	-2.88024
gypsy-9_dsim base	LTR	Gypsy	9960	20298	-1.603	108355	81915	-0.812277	63139	40976	-0.721566	46076	84694	-1.50492
gypsy-4_dsim base	LTR	Gypsy	81670	157848	-1.55224	389272	138662	-0.439578	238649	129435	-0.625143	104585	142555	-1.24064
linej1_dm base	Non-LTR_retrotransposon	Jockey	14920	150861	-3.47387	37965	39343	-1.02593	42766	53422	-1.16937	64152	160826	-1.8102
gypsy-10_dmoj base	LTR	Gypsy	6452	14864	-1.72396	2468	7412	-2.00073	4381	6777	-1.34855	4176	13870	-2.11122
fb4_dm base	DNA	TcMar-Tc1	4091	157882	-5.30681	4445	183680	-5.40305	3577	164505	-5.55388	5022	134072	-4.79138
blood base	LTR	Gypsy	19400	209324	-3.55941	36077	40448	-1.08483	74206	201199	-1.89193	63415	116813	-1.50691
gypsy-13_dsim base	LTR	Gypsy	3247	112949	-5.16088	205957	257240	-1.16928	70134	185669	-1.86683	124705	329599	-1.86513
15mer_sat base	Satellite	Satellite	0	0	0	46827	661489	-3.91895	41270	1033861	-4.70324	50197	888386	-4.22478
dm412 base	LTR	Gypsy	63746	233302	-2.22027	361401	149944	-0.500695	176108	240580	-1.2425	530835	295552	-0.638553
bel-22_dta base	LTR	Pao	673	2124	-2.05358	43271	7165	-0.221049	2453	0	0	4013	2807	-0.764943
quasimodo base	LTR	Gypsy	286241	368147	-1.19291	40736	13672	-0.417506	21724	25924	-1.13309	40393	16622	-0.497226
m4dm base	DNA	CMC-Transib	3873	55746	-3.9439	4505	43977	-3.42756	7722	44694	-2.7628	7677	44489	-2.76434
gypsy-8_dsim base	LTR	Gypsy	24178	54537	-1.7029	170052	109054	-0.714834	200211	61073	-0.384096	209100	251872	-1.14048
bel-2_dse base	LTR	Pao	14930	64283	-2.40744	17366	81087	-2.5031	16632	42521	-1.83043	27705	75940	-1.90339
dmrt1c base	Non-LTR_retrotransposon	R1	14480	63869	-2.43577	42003	118759	-1.93634	46998	74852	-1.37442	37910	120279	-2.06097
doc2_dm base	Non-LTR_retrotransposon	Jockey	66654	128169	-1.54739	81937	126506	-1.34706	159230	173623	-1.06377	34398	84469	-1.78892
dnarep1_dm base	RC	Helitron	16417	412338	-4.70681	18836	423162	-4.5524	21483	399670	-4.29301	32811	435250	-3.8344
gypsy6a base	LTR	Gypsy	4403	29749	-2.95513	4901	7399	-1.32733	7371	8105	-1.07	4939	11979	-1.77606
quasimodo2_dm base	LTR	Gypsy	61502	73401	-1.1332	85304	55524	-0.723242	116710	143386	-1.15611	96137	163067	-1.43091
protop_a base	DNA	P	306083	295111	-0.973905	63675	42637	-0.739496	49357	66142	-1.22654	38795	65463	-1.42619
bs base	Non-LTR_retrotransposon	Jockey	1666	88220	-5.75279	43797	18363	-0.505145	49952	17304	-0.429113	36727	40436	-1.07105
copia2 base	LTR	Copia	29759	133116	-2.45233	68123	66455	-0.982218	25212	54775	-1.66562	37004	63292	-1.43849
gypsy-20_dan base	LTR	Gypsy	1028	466	-0.538903	18361	14470	-0.838379	4528	3364	-0.801381	27756	4951	-0.236792
bel-17_del base	LTR	Pao	3951	20971	-2.65682	6543	25375	-2.28617	10351	28497	-1.90797	13560	27993	-1.61552
tirant base	LTR	Gypsy	1601	224520	-7.14108	100655	36525	-0.446648	45888	41574	-0.930524	115395	130170	-1.08952
nomad base	LTR	Gypsy	188287	269199	-1.28079	26233	49828	-1.53574	96924	82941	-0.891982	156343	171605	-1.06875
gypsy-11_dfi base	LTR	Gypsy	0	7516	-12.8759	4632	3641	-0.836638	2785	4563	-1.39935	3575	5957	-1.41458
bica base	LTR	Gypsy	16715	93598	-2.72231	13600	24149	-1.47276	35496	28974	-0.860953	50089	48670	-0.979404
gtwin base	LTR	Gypsy	36608	93028	-1.82421	125760	64768	-0.599326	109361	83037	-0.81499	228180	308637	-1.23425
dnarep1_dyak base	RC	Helitron	7155	128376	-4.24334	8301	128525	-4.04275	10665	119682	-3.61128	12886	126503	-3.43514
r1-2_dm base	Non-LTR_retrotransposon	R1	5558	18858	-2.13499	4758	8237	-1.44934	10127	9136	-0.927558	15529	13270	-0.891011
invader1 base	LTR	Gypsy	32062	147195	-2.48306	39175	34955	-0.920107	15933	29109	-1.49919	30709	49508	-1.38522
batumi base	LTR	Pao	593036	334750	-0.645672	758444	282056	-0.456162	743069	470794	-0.708037	422492	459256	-1.06144
dmrt1a base	Non-LTR_retrotransposon	R1	57731	179483	-2.03875	25050	34651	-1.25291	12166	28339	-1.73516	25903	33425	-1.19556
gypsy-26_dbp base	LTR	Gypsy	13210	29210	-1.68304	35232	55658	-1.36721	21870	58426	-1.87633	50602	79886	-1.36663
jockey-2_dan base	Non-LTR_retrotransposon	Jockey	0	835	-9.70736	6008	3487	-0.660195	4890	5556	-1.09489	3882	5124	-1.21387
max base	LTR	Pao	226489	225325	-0.996285	637341	243066	-0.466105	569324	399703	-0.767286	382756	408407	-1.04755
doc base	Non-LTR_retrotransposon	Jockey	198021	518501	-1.85535	14450	111633	-3.12514	9393	96027	-3.48828	9705	116380	-3.69939
gypsy-17_dta base	LTR	Gypsy	0	4378	-12.0964	7751	6006	-0.82763	8178	8926	-1.06442	5795	9500	-1.40002
r1-1_dsi base	Non-LTR_retrotransposon	R1	3147	20237	-2.89308	89504	123499	-1.25084	87713	220525	-1.81317	84958	169952	-1.58515
jockey-1_dsi base	Non-LTR_retrotransposon	Jockey	454	9060	-4.38627	151324	112767	-0.80339	154122	208632	-1.23491	103983	158312	-1.33483
jockey-5_dper base	Non-LTR_retrotransposon	Jockey	4242	8512	-1.58791	36745	6999	-0.251531	10579	5420	-0.596732	80835	2928	-0.0513324
looper1_dm base	DNA	PiggyBac	3158	8401	-1.8716	11195	4306	-0.469471	5434	4809	-0.914427	14056	4615	-0.409588
gypsy-8_del base	LTR	Gypsy	0	47269	-15.5286	7174	10267	-1.28151	14072	16299	-1.10981	26023	18454	-0.773249
gypsy-2_dbp base	LTR	Gypsy	0	4426	-12.1121	40179	15445	-0.469256	30477	10020	-0.410082	4031	40	-0.0142419
hat-2_dy base	DNA	hAT-hobo	41785	24864	-0.673585	0	2790	-11.4466	0	2047	-11	0	2707	-11.403
protop_b base	DNA	P	33345	183086	-2.69833	192081	243211	-1.18026	135523	170395	-1.1746	106486	215651	-1.597
gypsy-6_dse base	LTR	Gypsy	113377	143601	-1.18051	107899	69499	-0.717303	157264	40382	-0.329728	194673	137541	-0.771057
tart-a base	Non-LTR_retrotransposon	Jockey	564448	128891	-0.29672	267507	8776	-0.04657	160014	49401	-0.388165	137101	54863	-0.485594
gypsy-6_dsim base	LTR	Gypsy	124816	112730	-0.928399	114983	110480	-0.971464	181572	95468	-0.60955	174416	86973	-0.583663
gypsy16_dya base	LTR	Gypsy	2792	17502	-2.86124	5912	12031	-1.60154	8215	11354	-1.25214	12612	17503	-1.25562
chimpo base	LTR	Gypsy	73184	50770	-0.760197	31056	23257	-0.806406	70914	36477	-0.598724	33414	32859	-0.987947
protop base	DNA	P	365002	212780	-0.662619	90803	114405	-1.17627	61271	119177	-1.55829	100953	153273	-1.33242
accord base	LTR	Gypsy	35187	82131	-1.73728	56061	92507	-1.40604	55191	81764	-1.31118	71983	75668	-1.03645
gypsy-9_dfi base	LTR	Gypsy	2031	1402	-0.75699	9154	10375	-1.09306	8046	5855	-0.78877	11125	7449	-0.739427
copia-1_dsim base	LTR	Copia	10094	36719	-2.2133	29227	39940	-1.24275	37349	70913	-1.53536	59342	119480	-1.59138
gypsy-27_dya base	LTR	Gypsy	7383	20582	-1.9212	12834	33006	-1.83656	12243	29145	-1.75717	18501	33707	-1.49662
copia-2_dya base	LTR	Copia	110103	31527	-0.36327	22905	27924	-1.14995	13615	19273	-1.2723	22332	40768	-1.49849
invader3 base	LTR	Gypsy	60479	108207	-1.47982	65449	62847	-0.971022	23610	26190	-1.07672	85518	127330	-1.31551
helena_ds base	Non-LTR_retrotransposon	Jockey	9925	36774	-2.23414	59260	47490	-0.849095	91385	113507	-1.16483	76568	92548	-1.14319
dm412b base	LTR	Gypsy	3415	19795	-2.76443	52261	33674	-0.7175	22532	24151	-1.05089	52500	38875	-0.79947
dmcr1a base	Non-LTR_retrotransposon	CR1	92758	866425	-3.37025	590392	779056	-1.21385	472676	790262	-1.41786	453234	879489	-1.55605
idefix base	LTR	Gypsy	466098	315289	-0.745403	168697	27799	-0.220064	211568	27473	-0.176136	181268	73964	-0.493683
gypsy11 base	LTR	Gypsy	4045	14482	-2.19514	42758	26241	-0.690368	64088	17676	-0.351407	43850	19074	-0.521024
gypsy-1_dsim base	LTR	Gypsy	527348	511065	-0.977552	1443186	439208	-0.383311	1067306	257114	-0.311387	695699	383208	-0.633035
gypsy-22_dan base	LTR	Gypsy	0	0	0	4094	0	0	6901	636	-0.127167	4020	985	-0.316104
copia base	LTR	Copia	231907	238936	-1.0217	214988	65970	-0.386097	173287	44497	-0.329733	115526	61724	-0.617564
gypsy-13_dvir base	LTR	Gypsy	7509	8235	-1.06801	5164	20375	-2.30592	2157	6878	-2.06599	5595	17189	-2.02562
accord2 base	LTR	Gypsy	153781	75311	-0.575047	122023	35466	-0.368095	161440	50684	-0.393908	215453	120423	-0.640553
dnarep1_dsim base	RC	Helitron	44821	541937	-3.71049	38278	494641	-3.79929	46093	488925	-3.53694	49569	530094	-3.54768
dmrt1b base	Non-LTR_retrotransposon	R1	187971	373270	-1.57811	120257	179712	-1.31869	97974	169238	-1.4475	243685	299149	-1.15549
s_dm base	DNA	TcMar-Tc1	21951	121784	-2.711	0	6979	-12.769	0	6934	-12.7597	0	8260	-13.0121
gypsy-2_dsim base	LTR	Gypsy	87624	39838	-0.540664	235827	75644	-0.401367	161549	40907	-0.325635	178710	89227	-0.584271
gypsy-5_dse base	LTR	Gypsy	35506	73582	-1.61933	103262	42461	-0.496915	65916	41245	-0.701071	242868	160381	-0.731496
gypsy-12_dsim base	LTR	Gypsy	47632	64851	-1.23969	383987	97424	-0.326211	233170	43872	-0.248722	341217	134766	-0.480219
dmtom1 base	LTR	Gypsy	2417	8337	-2.15312	7340	9153	-1.16789	6816	8883	-1.20356	11031	10811	-0.985477
mdg1 base	LTR	Gypsy	178122	293504	-1.40477	396013	99581	-0.32361	139943	62765	-0.534561	375924	117572	-0.392596
baggins1 base	Non-LTR_retrotransposon	LOA	14338	334981	-4.60653	223278	359933	-1.38517	227630	315561	-1.25477	234006	400703	-1.43955
gypsy-34_del base	LTR	Gypsy	223	9723	-5.47269	59426	20036	-0.419165	34057	16104	-0.558601	68643	35404	-0.600044
copia-1_dbi base	LTR	Copia	21476	20592	-0.969965	17972	7657	-0.512002	13766	4286	-0.391024	35877	9075	-0.325318
gypsy-31_dya base	LTR	Gypsy	18744	29582	-1.36632	78799	70825	-0.925084	42070	37517	-0.919725	63876	68929	-1.05595
p-1_dy base	DNA	P	743	24910	-5.10774	12067	26031	-1.65857	11385	21507	-1.53052	13564	27277	-1.59016
jockey-5_dya base	Non-LTR_retrotransposon	Jockey	2180	7434	-2.1403	128273	92831	-0.785503	125653	108953	-0.900789	150874	115733	-0.821366
gypsy16_dpse base	LTR	Gypsy	2644	69	-0.037153	4572	0	0	988	62	-0.0877202	11024	62	-0.00809039
gypsy-8_dse base	LTR	Gypsy	116	6181	-5.75031	155745	85006	-0.628353	132768	63869	-0.566624	108657	51874	-0.563067
bel-6_dya base	LTR	Pao	88267	98880	-1.08422	370383	219636	-0.671742	518745	288806	-0.638527	557281	355359	-0.71164
tart_b1 base	Non-LTR_retrotransposon	Jockey	54577	4131	-0.105262	164681	44534	-0.34531	48474	10539	-0.283816	111842	24810	-0.289042
diver2 base	LTR	Pao	30682	61081	-1.58049	72266	51126	-0.771852	143564	96072	-0.739147	126141	91038	-0.783843
helitron-2_dbp base	RC	Helitron	0	69	-6.12928	0	0	0	0	0	0	13640	79	-0.00833107
dmel_rdna_18s_rdna base	rDNA	rDNA	96036	308186	-2.07349	0	0	0	0	0	0	0	0	0
dmel_rdna_its2 base	rDNA	rDNA	23844	61221	-1.8349	0	0	0	0	0	0	0	0	0
365u_sat base	Satellite	Satellite	0	2182	-11.0921	0	108631	-16.7291	0	86216	-16.3957	0	0	0
gypsy-7_deu base	LTR	Gypsy	0	0	0	0	0	0	2055	0	0	0	9557	-13.2225
gypsy9 base	LTR	Gypsy	0	44154	-15.4303	4405	11465	-1.84885	0	21132	-14.3672	0	21314	-14.3796
bel base	LTR	Pao	0	104023	-16.6666	6126	199113	-5.06599	0	126414	-16.9478	0	165599	-17.3373
copia-1_dya base	LTR	Copia	0	0	0	0	1567	-10.6147	0	0	0	0	6034	-12.5591
mudr-1_dk base	DNA	MULE-NOF	0	4883	-12.2538	0	25312	-14.6276	0	18976	-14.212	3697	26706	-3.03944
gypsy-47_del base	LTR	Gypsy	0	293	-8.19967	0	2428	-11.2461	0	0	0	0	2334	-11.1892
bel-4_drh base	LTR	Pao	0	3208	-11.6479	0	0	0	0	0	0	0	2271	-11.1497
hobo base	DNA	hAT-hobo	0	100301	-16.614	4295	44569	-3.50774	1345	103660	-6.28565	0	55554	-15.7616
gypsy-29_dan base	LTR	Gypsy	0	955	-9.90087	0	3037	-11.5689	2185	5385	-1.79219	0	14366	-13.8105
nof_fb base	DNA	MULE-NOF	0	6535	-12.6742	0	5452	-12.4128	0	4650	-12.1833	3747	5604	-1.31915
mariner-4_dbi base	DNA	TcMar-Mariner	0	0	0	0	2775	-11.4388	1013	1013	-0.999288	0	0	0
mudr-1_del base	DNA	MULE-NOF	0	512	-9.00282	0	12904	-13.6556	0	7998	-12.9656	1125	4700	-2.3713
gypsy-6_dbi base	LTR	Gypsy	0	4967	-12.2784	3007	750	-0.32116	0	2968	-11.5358	0	1658	-10.6961
gypsy-14_dta base	LTR	Gypsy	0	137	-7.10852	0	0	0	0	2738	-11.4194	0	1093	-10.0954
hoana3 base	DNA	hAT-hobo	0	0	0	0	1428	-10.4808	0	2092	-11.0314	0	0	0
transib3 base	DNA	CMC-Transib	2236	34061	-4.02025	2587	9522	-2.22629	0	7942	-12.9555	2067	8453	-2.34696
bari_dm base	DNA	TcMar-Tc1	3359	55514	-4.1311	1728	10415	-2.81223	3945	8640	-1.67336	0	6832	-12.7383
copia-7_dwil base	LTR	Copia	0	0	0	0	1425	-10.4778	0	0	0	0	1449	-10.5018
copia-1_dvir base	LTR	Copia	0	9841	-13.2647	0	3424	-11.7419	2518	4224	-1.42054	0	3898	-11.9289
gypsy-36_del base	LTR	Gypsy	0	633	-9.30834	0	1383	-10.4346	0	0	0	0	1251	-10.29
transib5 base	DNA	CMC-Transib	0	35867	-15.1304	1091	15774	-3.94907	0	21310	-14.3793	0	18217	-14.1531
copia-2_dbp base	LTR	Copia	0	0	0	0	998	-9.96434	0	1497	-10.5488	0	0	0
gypsy-41_dan base	LTR	Gypsy	0	1969	-10.944	64	0	0	0	1251	-10.29	0	1196	-10.2252
tc1-2_dm base	DNA	TcMar-Tc1	996	39732	-5.35232	1840	25573	-3.89635	383	19492	-5.69378	0	29540	-14.8504
copia-6_dan base	LTR	Copia	0	0	0	0	0	0	0	0	0	0	1034	-10.0154
jockey-6_dya base	Non-LTR_retrotransposon	Jockey	0	1280	-10.3231	0	3129	-11.6119	920	750	-0.859439	0	940	-9.87805
mariner-20_dan base	DNA	TcMar-Tc1	0	9525	-13.2177	512	9638	-4.30652	0	7721	-12.9148	1929	6287	-2.09001
gypsy5_dpse base	LTR	Gypsy	0	1260	-10.3004	0	3150	-11.6216	152	1275	-3.22239	3504	2290	-0.725394
gypsy-32_dan base	LTR	Gypsy	0	810	-9.66356	3137	0	0	0	0	0	0	933	-9.86728
gypsy-10_dwil base	LTR	Gypsy	0	289	-8.17991	0	0	0	0	927	-9.85798	0	0	0
gypsy-25_dan base	LTR	Gypsy	1163	338	-0.367794	324	28	-0.119228	0	928	-9.85953	907	28	-0.0438162
gypsy-51_del base	LTR	Gypsy	0	0	0	0	0	0	0	1250	-10.2889	0	527	-9.04439
gypsy-13_del base	LTR	Gypsy	0	2559	-11.3219	0	0	0	0	932	-9.86573	0	655	-9.35755
polinton-1_del base	DNA	Maverick	0	0	0	0	781	-9.61102	0	0	0	0	0	0
kolobok-1_dbp base	DNA	Kolobok-Hydra	0	0	0	0	0	0	0	0	0	0	746	-9.54496
gypsy-15_dbi base	LTR	Gypsy	221	42	-0.249978	0	2534	-11.3078	819	2059	-1.81187	0	2648	-11.3712
bel-3_dya base	LTR	Pao	144	16426	-6.83646	805	11972	-3.98674	0	11391	-13.4757	800	12415	-4.04434
gypsy-17_drh base	LTR	Gypsy	0	5343	-12.3837	735	4579	-2.85229	555	6109	-3.58345	0	6448	-12.6549
gypsy-15_dbp base	LTR	Gypsy	0	1185	-10.2119	0	0	0	0	676	-9.40301	0	0	0
gypsy-12_drh base	LTR	Gypsy	6924	5489	-0.842082	433	5742	-3.83091	0	9116	-13.1543	0	9318	-13.186
gypsy8_dpse base	LTR	Gypsy	67	54276	-9.64237	1067	53814	-5.68335	0	55876	-15.77	297	52873	-7.47918
mariner-15_dk base	DNA	TcMar-Tc1	377	12969	-5.14199	693	9081	-3.81609	703	8070	-3.63959	0	8418	-13.0394
360bp_sat base	Satellite	Satellite	292	117860	-8.65554	0	671889	-19.3579	0	1349252	-20.3637	373	582940	-10.607
transib-10_dan base	DNA	CMC-Transib	0	1194	-10.2228	0	1474	-10.5265	204	392	-1.54211	1067	1029	-0.973415
jockey-10_dbp base	Non-LTR_retrotransposon	Jockey	0	5350	-12.3856	562	3359	-2.80038	0	4193	-12.0341	0	4455	-12.1215
bel-1_dbi base	LTR	Pao	0	1378	-10.4294	0	4155	-12.021	0	1747	-10.7715	723	2769	-2.27041
kiri-1_dper base	Non-LTR_retrotransposon	L2	0	0	0	0	0	0	0	0	0	0	579	-9.17991
gypsy-6_deu base	LTR	Gypsy	0	10423	-13.3476	624	3803	-2.82473	0	3495	-11.7715	0	4724	-12.2061
gypsy-11_dvir base	LTR	Gypsy	0	71	-6.16993	0	599	-9.22882	0	535	-9.06609	0	0	0
gypsy-21_dya base	LTR	Gypsy	0	0	0	0	2860	-11.4823	876	2289	-1.85201	626	4190	-2.9416
bel-4_dya base	LTR	Pao	136	15622	-6.84586	985	6104	-2.84613	0	3599	-11.8138	0	4492	-12.1335
gypsy-52_del base	LTR	Gypsy	1314	21204	-4.09801	1224	9922	-3.1858	0	1993	-10.9614	0	9667	-13.239
r1-2b_dk base	Non-LTR_retrotransposon	R1	0	0	0	0	679	-9.40939	0	439	-8.78136	0	0	0
jockey-3_dgri base	Non-LTR_retrotransposon	Jockey	0	148320	-17.1784	556	158058	-8.15364	0	159345	-17.2818	0	152737	-17.2207
gypsy-3_dgri base	LTR	Gypsy	2553	2067	-0.855447	0	0	0	0	543	-9.08746	0	0	0
mariner-5_drh base	DNA	TcMar-Tc1	0	1210	-10.242	0	47	-5.58496	0	1404	-10.4564	0	0	0
gypsy-55_del base	LTR	Gypsy	0	109	-6.78136	0	0	0	0	321	-8.33092	0	788	-9.62388
gypsy-19_del base	LTR	Gypsy	0	506	-8.98584	0	318	-8.31741	0	782	-9.61287	0	0	0
copia-2_dan base	LTR	Copia	0	152	-7.25739	0	0	0	0	0	0	0	499	-8.96578
i-3_dan base	Non-LTR_retrotransposon	I	0	209	-7.71425	0	501	-8.97154	0	491	-8.94251	0	0	0
mariner-3_df base	DNA	TcMar-Mariner	0	0	0	0	0	0	0	241	-7.91886	0	841	-9.71768
gypsy-7_dwil base	LTR	Gypsy	0	43	-5.45943	0	291	-8.18982	516	0	0	0	711	-9.47573
copia1_dmoj base	LTR	Copia	0	69	-6.12928	0	0	0	0	476	-8.89785	0	0	0
gypsy-12_dper base	LTR	Gypsy	0	0	0	0	791	-9.62936	0	234	-7.87652	0	0	0
gypsy-8_deu base	LTR	Gypsy	0	0	0	0	0	0	0	0	0	0	471	-8.88264
gypsy-8_dvir base	LTR	Gypsy	0	6464	-12.6584	0	7111	-12.796	0	6029	-12.5579	401	5322	-3.83176
copia1_dpse base	LTR	Copia	0	1059	-10.0498	586	2688	-2.48006	0	2099	-11.0362	1631	4591	-1.93097
hat-2_dk base	DNA	hAT-Ac	1861	57801	-5.00191	562	1619	-1.95444	0	2239	-11.1293	0	1373	-10.4242
bel-5_del base	LTR	Pao	0	89	-6.49185	0	0	0	0	455	-8.83289	0	0	0
gypsy-1_deu base	LTR	Gypsy	30	0	0	58	142	-1.76841	0	765	-9.5812	0	0	0
gypsy-13_dbi base	LTR	Gypsy	0	379	-8.56986	0	0	0	0	452	-8.82337	0	0	0
jockey-14_dbp base	Non-LTR_retrotransposon	Jockey	0	1833	-10.8408	0	722	-9.49785	296	359	-1.14323	0	1322	-10.3696
gypsy-30_dan base	LTR	Gypsy	0	126	-6.98868	158	299	-1.52632	0	706	-9.46557	0	0	0
gypsy-15_drh base	LTR	Gypsy	0	666	-9.38154	282	287	-1.01016	0	913	-9.83605	0	872	-9.76984
mariner-15_df base	DNA	TcMar-Tc1	0	650	-9.34651	0	439	-8.78136	0	0	0	0	0	0
polinton-1_dy base	DNA	Maverick	0	25831	-14.6569	537	20281	-5.27415	0	18922	-14.2079	0	14746	-13.8481
500u_sat base	Satellite	Satellite	0	0	0	0	2841282	-21.4381	0	3940382	-21.9099	606	4724329	-12.9263
260bp_sat base	Satellite	1pt688	0	75128	-16.1971	0	30224	-14.8835	0	26056	-14.6694	238	15715	-6.06076
jockey-6_dbp base	Non-LTR_retrotransposon	Jockey	0	0	0	0	418	-8.71081	0	0	0	0	0	0
gypsy-10_dvir base	LTR	Gypsy	0	2998	-11.5503	0	2104	-11.0396	0	2453	-11.2609	592	2642	-2.44766
jockey-2_dsim base	Non-LTR_retrotransposon	Jockey	567	1731	-2.01704	426	2392	-2.72288	0	2223	-11.1189	0	3265	-11.6733
gypsy-4_dan base	LTR	Gypsy	0	457	-8.8392	0	1423	-10.4757	0	2225	-11.1202	432	1473	-2.13811
i-4_df base	Non-LTR_retrotransposon	I	0	838	-9.71253	0	518	-9.01959	0	296	-8.21432	0	0	0
i-1_dbp base	Non-LTR_retrotransposon	I	0	331	-8.37504	0	629	-9.29921	0	0	0	0	200	-7.65105
bel-16_dan base	LTR	Pao	0	56	-5.83289	0	0	0	0	413	-8.69349	0	353	-8.46761
gypsy-31_dp base	LTR	Gypsy	0	0	0	0	437	-8.77479	0	325	-8.34873	0	0	0
gypsy-33_dan base	LTR	Gypsy	0	302	-8.24317	0	376	-8.55842	0	0	0	0	0	0
gypsy-36_dan base	LTR	Gypsy	0	0	0	0	0	0	0	369	-8.53138	0	0	0
gypsy3_dv base	LTR	Gypsy	0	0	0	0	358	-8.48784	0	0	0	0	0	0
jockey-15_dbp base	Non-LTR_retrotransposon	Jockey	411	667	-1.38898	0	673	-9.3966	407	812	-1.58024	1390	502	-0.444552
gypsy-7_dbi base	LTR	Gypsy	0	12693	-13.6319	0	106	-6.74147	0	0	0	0	705	-9.46352
bel-9_dan base	LTR	Pao	0	0	0	0	198	-7.63662	0	511	-9	0	0	0
gypsy10 base	LTR	Gypsy	0	92660	-16.4997	332	91185	-8.10239	0	123908	-16.9189	0	64453	-15.976
bel-6_dmoj base	LTR	Pao	704	425	-0.680628	0	430	-8.75154	226	100	-0.526598	0	530	-9.05257
bel-1_del base	LTR	Pao	0	0	0	0	0	0	0	323	-8.33985	0	0	0
gypsy-9_dper base	LTR	Gypsy	0	0	0	0	318	-8.31741	0	319	-8.32193	0	0	0
gypsy-18_del base	LTR	Gypsy	0	5186	-12.3407	427	2136	-2.58271	0	4256	-12.0556	0	382	-8.5812
gypsy-14_dbp base	LTR	Gypsy	0	37	-5.24793	0	0	0	0	0	0	0	313	-8.29462
r2_dps base	Non-LTR_retrotransposon	R2	0	0	0	0	0	0	0	0	0	0	311	-8.2854
copia-1_dbp base	LTR	Copia	0	280	-8.13443	0	114	-6.84549	0	0	0	0	581	-9.18488
mariner-11_dbp base	DNA	TcMar-Tc1	0	0	0	0	0	0	0	307	-8.26679	0	0	0
hoyak2 base	DNA	hAT-Ac	575	10718	-4.29334	750	11966	-4.0818	0	11328	-13.4677	76	12623	-7.36575
bel-2_del base	LTR	Pao	0	0	0	0	302	-8.24317	0	0	0	0	0	0
kolobok-n1_dan base	DNA	Kolobok-Hydra	0	0	0	0	0	0	0	0	0	0	300	-8.23362
mariner-7_del base	DNA	TcMar-Mariner	0	185	-7.53916	0	0	0	0	294	-8.20457	0	0	0
gypsy-3_dbi base	LTR	Gypsy	0	298	-8.224	1163	637	-0.629707	0	426	-8.73809	1157	435	-0.460111
bel-10_dwil base	LTR	Pao	0	1134	-10.1485	260	666	-1.82852	0	740	-9.53333	0	1379	-10.4305
gypsy18_dya base	LTR	Gypsy	0	15180	-13.89	0	2505	-11.2912	0	2421	-11.242	758	5749	-3.10004
r1_dpe base	Non-LTR_retrotransposon	R1	0	0	0	0	569	-9.15482	118	0	0	0	85	-6.42626
jockey-5_df base	Non-LTR_retrotransposon	Jockey	0	719	-9.49185	0	425	-8.73471	0	156	-7.29462	0	0	0
i-5_df base	Non-LTR_retrotransposon	I	0	0	0	0	0	0	0	272	-8.09276	0	0	0
mariner-9_drh base	DNA	TcMar-Tc1	0	2503	-11.29	587	2547	-2.41458	236	2902	-3.72735	0	2097	-11.0348
gypsy-22_dwil base	LTR	Gypsy	0	14971	-13.87	140	8311	-5.90553	420	8950	-4.47631	0	8952	-13.1282
r1_dwi base	Non-LTR_retrotransposon	R1	196	0	0	0	55	-5.80735	0	0	0	0	566	-9.1472
gypsy-11_dan base	LTR	Gypsy	2341	177	-0.10511	0	317	-8.31288	850	244	-0.3637	0	342	-8.42206
r1-7_dper base	Non-LTR_retrotransposon	R1	0	1040	-10.0238	2810	2170	-0.825352	465	880	-1.53028	0	557	-9.12412
transib-2_dbp base	DNA	CMC-Transib	0	0	0	0	0	0	0	0	0	0	249	-7.96578
gypsy-13_dfi base	LTR	Gypsy	0	4946	-12.2723	1978	66	-0.0473292	759	140	-0.243926	0	267	-8.06609
gypsy-3_dper base	LTR	Gypsy	0	167	-7.39232	574	1781	-2.03471	0	425	-8.73471	519	0	0
i-5_dk base	Non-LTR_retrotransposon	I	0	96	-6.59991	0	0	0	0	239	-7.90689	0	0	0
copia-3_dgri base	LTR	Copia	0	0	0	240	0	0	0	0	0	0	237	-7.89482
bel-5_drh base	LTR	Pao	0	1104	-10.1098	0	0	0	0	357	-8.48382	0	139	-7.12928
transib-4_dbp base	DNA	CMC-Transib	0	13702	-13.7422	0	275	-8.10852	0	284	-8.15482	1044	188	-0.23867
3l-tas_sat base	Satellite	Satellite	0	0	0	0	13779	-13.7503	0	30945	-14.9175	0	90	-6.50779
cr1-1_dk base	Non-LTR_retrotransposon	CR1	0	50	-5.67243	0	0	0	0	100	-6.65821	0	419	-8.71425
bel-4_del base	LTR	Pao	0	5672	-12.4699	395	4900	-3.74133	416	966	-1.72968	0	1350	-10.3998
gypsy7_dpse base	LTR	Gypsy	0	176	-7.46761	0	0	0	0	36	-5.20945	0	524	-9.03617
hat-n1b_dbp base	DNA	hAT-Ac	0	7016	-12.7766	0	5270	-12.3639	291	5022	-4.18576	163	4747	-4.90425
gypsy-15_dwil base	LTR	Gypsy	0	1878	-10.8757	0	0	0	0	141	-7.14975	0	326	-8.35315
i-2_dvi base	Non-LTR_retrotransposon	I	0	62	-5.97728	0	225	-7.82018	0	225	-7.82018	0	0	0
mariner-2_dt base	DNA	TcMar-Tc1	0	1552	-10.6008	0	1194	-10.2228	357	1765	-2.56807	0	1399	-10.4512
jockey-3_drh base	Non-LTR_retrotransposon	Jockey	0	484	-8.92184	0	148	-7.21917	0	470	-8.87958	696	233	-0.416072
gypsy-24_del base	LTR	Gypsy	0	8754	-13.0959	0	2606	-11.3482	0	3456	-11.7553	288	3718	-3.79338
polinton-2_dbi base	DNA	Maverick	0	65	-6.04439	0	357	-8.48382	0	0	0	0	96	-6.59991
mariner-1_dbi base	DNA	TcMar-Mariner	0	0	0	0	60	-5.93074	0	0	0	0	418	-8.71081
copia-3_dwil base	LTR	Copia	0	463	-8.85798	1550	1201	-0.827282	0	457	-8.8392	1549	2773	-1.47976
gypsy-12_dvir base	LTR	Gypsy	0	659	-9.36632	596	302	-0.59059	0	289	-8.17991	1085	320	-0.372572
copia-5_dan base	LTR	Copia	0	571	-9.15987	0	175	-7.45943	0	237	-7.89482	0	0	0
p_dg base	DNA	P	0	3070	-11.5845	0	4669	-12.1892	0	4534	-12.1469	124	2716	-4.5064
gypsy21_dpse base	LTR	Gypsy	0	0	0	0	0	0	0	202	-7.66534	0	194	-7.60733
jockey-1_df base	Non-LTR_retrotransposon	Jockey	0	3130	-11.6124	118	3103	-4.75892	0	2617	-11.3542	353	2459	-2.99029
jockey-7_deu base	Non-LTR_retrotransposon	Jockey	0	59	-5.90689	0	0	0	0	138	-7.11894	0	257	-8.01123
helitron-1_df base	RC	Helitron	0	3793	-11.8895	0	2920	-11.5122	0	5539	-12.4357	104	2136	-4.41568
jockey-8_df base	Non-LTR_retrotransposon	Jockey	0	0	0	0	0	0	0	0	0	0	190	-7.57743
kiri-1_dta base	Non-LTR_retrotransposon	L2	0	164	-7.36632	0	0	0	0	189	-7.56986	0	0	0
howilli3 base	DNA	hAT-Ac	0	106	-6.74147	0	0	0	0	345	-8.43463	0	72	-6.18982
gypsy-17_dan base	LTR	Gypsy	0	2554	-11.3191	487	3927	-3.17746	0	3659	-11.8376	48	4548	-6.55177
mariner-13_dk base	DNA	TcMar-Tc1	0	0	0	0	0	0	0	186	-7.54689	0	0	0
r1-1c_dk base	Non-LTR_retrotransposon	R1	0	0	0	0	113	-6.83289	0	0	0	0	260	-8.02791
dtripu2cons base	DNA	TcMar-Mariner	0	227	-7.83289	0	0	0	0	179	-7.49185	0	179	-7.49185
r1-2_dya base	Non-LTR_retrotransposon	R1	0	86	-6.44294	0	0	0	0	178	-7.48382	0	0	0
r1-2_del base	Non-LTR_retrotransposon	R1	0	0	0	0	162	-7.34873	0	189	-7.56986	0	0	0
jockey-4_dya base	Non-LTR_retrotransposon	Jockey	0	141	-7.14975	0	174	-7.45121	0	0	0	0	0	0
hoana2 base	DNA	hAT-Ac	0	43	-5.45943	0	211	-7.72792	0	0	0	0	140	-7.13955
mariner-24_df base	DNA	TcMar-Tc1	0	330	-8.37069	0	118	-6.89482	0	236	-7.88874	0	0	0
jockey-2_dk base	Non-LTR_retrotransposon	Jockey	57	55	-0.962198	0	643	-9.33092	0	414	-8.69697	298	608	-1.60096
bel-7_dta base	LTR	Pao	0	43	-5.45943	0	0	0	0	0	0	0	170	-7.41785
jockey-1_dwi base	Non-LTR_retrotransposon	Jockey	0	0	0	45	98	-1.64636	0	0	0	0	270	-8.08215
gypsy-5_dbp base	LTR	Gypsy	0	2617	-11.3542	148	1532	-3.49594	0	2030	-10.988	0	1774	-10.7936
kiri-2_dper base	Non-LTR_retrotransposon	L2	0	0	0	0	167	-7.39232	0	0	0	0	0	0
r1-1_dk base	Non-LTR_retrotransposon	R1	0	705	-9.46352	0	167	-7.39232	0	0	0	0	0	0
gypsy3_dpse base	LTR	Gypsy	0	98	-6.62936	0	0	0	0	269	-8.07682	0	84	-6.40939
mariner-11_drh base	DNA	TcMar-Tc1	0	0	0	0	0	0	0	0	0	0	166	-7.3837
r1-2_dbp base	Non-LTR_retrotransposon	R1	0	0	0	0	282	-8.14466	0	74	-6.22882	0	0	0
r1b_dvi base	Non-LTR_retrotransposon	R1	0	0	0	289	511	-1.46575	0	378	-8.56605	0	530	-9.05257
ivk_dm base	Non-LTR_retrotransposon	I	0	151429	-17.2083	175	89088	-8.98636	0	97170	-16.5682	0	69346	-16.0815
piggybac-2_deu base	DNA	PiggyBac	0	0	0	0	162	-7.34873	0	0	0	0	0	0
bel-10_del base	LTR	Pao	0	67	-6.08746	133	56	-0.503766	0	239	-7.90689	441	239	-0.623608
mariner-4_dan base	DNA	TcMar-Tc1	0	187	-7.55459	0	172	-7.43463	0	0	0	0	146	-7.19967
jockey-5_dan base	Non-LTR_retrotransposon	Jockey	0	0	0	0	0	0	0	80	-6.33985	0	248	-7.96
jockey-12_dan base	Non-LTR_retrotransposon	Jockey	0	136	-7.09803	0	0	0	0	0	0	0	155	-7.2854
jockey-5_deu base	Non-LTR_retrotransposon	Jockey	0	0	0	0	29	-4.90689	0	328	-8.36194	0	0	0
transib-1_df base	DNA	CMC-Transib	0	105	-6.72792	0	0	0	0	154	-7.27612	0	0	0
hat-3_dt base	DNA	hAT-hobo	0	0	0	0	0	0	0	0	0	0	151	-7.24793
homo2 base	DNA	hAT-Ac	0	50	-5.67243	0	0	0	0	0	0	0	151	-7.24793
transib-5_drh base	DNA	CMC-Transib	0	0	0	0	0	0	0	145	-7.18982	0	0	0
jockey-1_del base	Non-LTR_retrotransposon	Jockey	0	36	-5.20945	0	0	0	0	181	-7.50779	0	109	-6.78136
transib-2_drh base	DNA	CMC-Transib	0	507	-8.98868	284	1605	-2.72935	0	738	-9.52943	0	1167	-10.1898
dsech_rdna_its2 base	rDNA	rDNA	0	0	0	765	290	-0.463194	0	385	-8.59246	6315	62113	-3.43752
gypsy-45_del base	LTR	Gypsy	38	0	0	0	0	0	0	98	-6.62936	0	182	-7.5157
jockey-4_dper base	Non-LTR_retrotransposon	Jockey	0	40	-5.35755	0	0	0	0	137	-7.10852	0	0	0
r2b_dm base	Non-LTR_retrotransposon	R2	0	257	-8.01123	0	65	-6.04439	0	460	-8.84862	90	65	-0.777608
gypsy-33_del base	LTR	Gypsy	0	354	-8.47168	0	382	-8.5812	306	404	-1.21161	0	252	-7.98299
gypsy-13_dan base	LTR	Gypsy	175	160	-0.932886	0	0	0	0	0	0	0	133	-7.06609
gypsy-7_dbp base	LTR	Gypsy	0	48	-5.61471	0	0	0	0	133	-7.06609	0	0	0
359bp_sat base	Satellite	1pt688	0	558142	-19.0903	0	249327	-17.9277	0	123913	-16.919	155	213465	-10.4193
r1-1_dan base	Non-LTR_retrotransposon	R1	0	0	0	0	132	-7.05528	0	0	0	0	0	0
gypsy-37_del base	LTR	Gypsy	0	2050	-11.0021	509	778	-1.33656	81	81	-0.991176	0	294	-8.20457
bel-13_del base	LTR	Pao	0	0	0	0	0	0	0	0	0	0	131	-7.04439
hat-4_drh base	DNA	hAT-hobo	0	106	-6.74147	0	119	-6.90689	0	0	0	0	140	-7.13955
polinton-1_dk base	DNA	Maverick	0	223	-7.80735	0	0	0	0	172	-7.43463	0	89	-6.49185
tld2 base	LTR	Gypsy	0	50	-5.67243	1921	0	0	0	126	-6.98868	130	0	0
bel-20_dta base	LTR	Pao	50	182	-2.19176	0	210	-7.7211	0	58	-5.88264	0	0	0
copia-1_dy base	LTR	Copia	0	1343	-10.3923	223	3591	-4.09011	0	3247	-11.6653	0	1240	-10.2773
gypsy-9_dmoj base	LTR	Gypsy	0	134	-7.07682	0	125	-6.97728	0	0	0	0	0	0
gypsy-25_dpse base	LTR	Gypsy	0	0	0	448	87	-0.255518	0	176	-7.46761	0	123	-6.9542
cr1-1_dan base	Non-LTR_retrotransposon	CR1	0	0	0	0	124	-6.96578	0	0	0	0	0	0
p-1n1_dbp base	DNA	P	0	0	0	0	163	-7.35755	0	89	-6.49185	0	0	0
gypsy-15_del base	LTR	Gypsy	105	11790	-6.81027	122	11806	-6.59967	0	12268	-13.5827	0	11621	-13.5046
i-1_dya base	Non-LTR_retrotransposon	I	0	72	-6.18982	0	122	-6.94251	0	0	0	0	0	0
cr1-1_dbp base	Non-LTR_retrotransposon	CR1	0	0	0	0	0	0	0	121	-6.93074	0	0	0
jockey-5_dbp base	Non-LTR_retrotransposon	Jockey	0	0	0	0	121	-6.93074	0	0	0	0	0	0
transib-n1_dm base	DNA	CMC-Transib	0	9751	-13.2515	0	8019	-12.9694	123	8606	-6.13757	0	8940	-13.1262
jockey-9_df base	Non-LTR_retrotransposon	Jockey	0	977	-9.93369	68	867	-3.76184	0	1325	-10.3729	0	1962	-10.9388
gypsy20_dpse base	LTR	Gypsy	0	393	-8.62205	3584	0	0	0	134	-7.07682	167	49	-0.369234
bel-2_dvir base	LTR	Pao	0	3576	-11.8045	0	1016	-9.9901	0	773	-9.59619	203	1337	-2.91723
gypsy-19_dta base	LTR	Gypsy	0	1215	-10.2479	0	0	0	0	0	0	0	117	-6.88264
gypsy22_dpse base	LTR	Gypsy	0	1234	-10.2703	356	1528	-2.40057	0	297	-8.21917	0	1009	-9.98014
gypsy-30_dya base	LTR	Gypsy	0	91	-6.52356	0	116	-6.87036	0	0	0	0	0	0
mariner-6_df base	DNA	TcMar-Mariner	0	680	-9.41151	0	0	0	0	0	0	0	116	-6.87036
bel-18_dan base	LTR	Pao	0	0	0	0	0	0	0	140	-7.13955	0	87	-6.45943
copia2_dpse base	LTR	Copia	0	0	0	0	110	-6.79442	0	0	0	0	0	0
gypsy-11_del base	LTR	Gypsy	0	452	-8.82337	0	0	0	0	110	-6.79442	0	0	0
gypsy-7_drh base	LTR	Gypsy	0	0	0	0	0	0	0	0	0	0	110	-6.79442
kboc_db base	DNA	P	0	0	0	0	0	0	0	107	-6.75489	0	0	0
bel-14_dta base	LTR	Pao	0	1415	-10.4676	0	0	0	0	106	-6.74147	0	0	0
jockey-3_dk base	Non-LTR_retrotransposon	Jockey	0	53	-5.75489	0	106	-6.74147	0	0	0	0	0	0
ulysses base	LTR	Gypsy	0	0	0	0	106	-6.74147	0	0	0	0	0	0
gypsy-9_drh base	LTR	Gypsy	0	604	-9.24079	0	700	-9.45327	0	694	-9.44087	198	1109	-2.71652
jockey-10_dy base	Non-LTR_retrotransposon	Jockey	0	151	-7.24793	0	157	-7.30378	305	150	-0.575502	0	157	-7.30378
mariner-19_dan base	DNA	TcMar-Tc1	0	0	0	0	0	0	0	0	0	0	105	-6.72792
gypsy10_dpse base	LTR	Gypsy	88	193	-1.66382	529	26	-0.0690925	0	112	-6.82018	0	108	-6.76818
bel-1_dan base	LTR	Pao	0	0	0	0	184	-7.53138	0	0	0	0	41	-5.39232
gypsy-6_dgri base	LTR	Gypsy	0	5589	-12.4486	0	3934	-11.9421	0	51	-5.70044	0	7199	-12.8138
r1-3_dper base	Non-LTR_retrotransposon	R1	0	111	-6.80735	0	0	0	0	0	0	0	104	-6.71425
minime_dn base	Non-LTR_retrotransposon	MINIME_DN	0	7777	-12.9252	0	10354	-13.338	0	8619	-13.0735	116	10518	-6.50617
jockey-1_dro base	Non-LTR_retrotransposon	Jockey	0	0	0	0	102	-6.6865	0	0	0	0	0	0
doc4_dm base	Non-LTR_retrotransposon	Jockey	3234	54985	-4.16968	125	12698	-6.66928	0	15747	-13.9429	58	15758	-8.06655
gypsy-38_del base	LTR	Gypsy	0	0	0	0	102	-6.6865	0	101	-6.67243	0	0	0
bel-15_dp base	LTR	Pao	0	97	-6.61471	0	100	-6.65821	0	0	0	0	0	0
r1-14_dwi base	Non-LTR_retrotransposon	R1	0	0	0	0	0	0	0	0	0	0	99	-6.64386
gypsy-43_del base	LTR	Gypsy	0	0	0	0	209	-7.71425	182	209	-1.09901	0	216	-7.76155
r1-1_df base	Non-LTR_retrotransposon	R1	0	0	0	0	0	0	0	98	-6.62936	0	0	0
copia-5_dwil base	LTR	Copia	0	610	-9.25503	0	0	0	0	67	-6.08746	0	132	-7.05528
gypsy-1_dta base	LTR	Gypsy	0	0	0	0	97	-6.61471	0	0	0	0	0	0
i-1_dk base	Non-LTR_retrotransposon	I	0	0	0	0	0	0	0	97	-6.61471	0	0	0
gypsy-20_del base	LTR	Gypsy	0	8672	-13.0823	0	139	-7.12928	0	59	-5.90689	0	0	0
gypsy-9_deu base	LTR	Gypsy	48	64	-1.20547	0	130	-7.03342	0	64	-6.02237	0	0	0
gypsy-22_dbp base	LTR	Gypsy	0	50	-5.67243	0	50	-5.67243	0	0	0	0	148	-7.21917
jockey-7_df base	Non-LTR_retrotransposon	Jockey	0	1322	-10.3696	0	146	-7.19967	0	0	0	0	51	-5.70044
gypsy-9_dbp base	LTR	Gypsy	0	0	0	0	40	-5.35755	0	161	-7.33985	0	0	0
loa-1_dper base	Non-LTR_retrotransposon	LOA	0	53	-5.75489	0	0	0	0	69	-6.12928	0	122	-6.94251
rtex-2_dt base	Non-LTR_retrotransposon	RTE-X	0	0	0	0	0	0	0	94	-6.56986	0	0	0
dna3-1_dta base	DNA	DNA	0	166	-7.3837	0	66	-6.06609	0	124	-6.96578	0	0	0
hat-6_dbp base	DNA	hAT-hobo	0	92	-6.53916	0	0	0	0	92	-6.53916	0	0	0
r1-3b_del base	Non-LTR_retrotransposon	R1	129	106	-0.860275	0	64	-6.02237	155	0	0	0	121	-6.93074
bel-7_dan base	LTR	Pao	0	68	-6.10852	0	91	-6.52356	0	0	0	0	91	-6.52356
piggybac-1_dan base	DNA	PiggyBac	0	93	-6.55459	0	0	0	0	91	-6.52356	0	91	-6.52356
gypsy-7_dper base	LTR	Gypsy	0	132	-7.05528	351	950	-1.88708	0	492	-8.94544	0	204	-7.67948
cr1-3_dper base	Non-LTR_retrotransposon	CR1	0	0	0	0	131	-7.04439	0	0	0	0	55	-5.80735
cr1-5_del base	Non-LTR_retrotransposon	CR1	0	69	-6.12928	0	90	-6.50779	0	0	0	0	0	0
bel-9_dbp base	LTR	Pao	0	0	0	0	0	0	0	0	0	0	89	-6.49185
gypsy-19_dan base	LTR	Gypsy	0	0	0	0	0	0	0	89	-6.49185	0	89	-6.49185
gypsy-42_dan base	LTR	Gypsy	0	0	0	0	0	0	0	89	-6.49185	0	0	0
parisa_dmo base	DNA	TcMar-Tc1	0	0	0	0	89	-6.49185	0	0	0	0	0	0
i-1_dvi base	Non-LTR_retrotransposon	I	0	0	0	0	0	0	0	74	-6.22882	0	104	-6.71425
bel-5_dwil base	LTR	Pao	0	5474	-12.4186	0	49	-5.64386	0	0	0	0	131	-7.04439
helitron-1_dpe base	RC	Helitron	0	49	-5.64386	74	44	-0.665999	0	120	-6.91886	0	155	-7.2854
mariner-27_df base	DNA	TcMar-Tc1	0	0	0	0	0	0	0	0	0	0	86	-6.44294
outcast-1_dwi base	Non-LTR_retrotransposon	Jockey	0	0	0	0	0	0	0	0	0	0	86	-6.44294
r1-5_df base	Non-LTR_retrotransposon	R1	0	0	0	0	96	-6.59991	0	74	-6.22882	0	0	0
mariner-3_del base	DNA	TcMar-Tc1	0	174	-7.45121	0	0	0	0	84	-6.40939	0	84	-6.40939
dsim_rdna_its1 base	rDNA	rDNA	0	196	-7.62205	530	0	0	1378	139672	-6.67645	2346	1159	-0.579008
bel-1_dta base	LTR	Pao	0	37	-5.24793	0	0	0	0	0	0	0	83	-6.39232
copia-1_dta base	LTR	Copia	0	0	0	0	0	0	0	83	-6.39232	0	83	-6.39232
cr1-4_dt base	Non-LTR_retrotransposon	CR1	0	0	0	0	73	-6.20945	0	93	-6.55459	0	0	0
mariner-1_dgr base	DNA	TcMar-Tc1	0	0	0	0	0	0	0	81	-6.35755	0	0	0
r1-1_dt base	Non-LTR_retrotransposon	R1	0	0	0	0	0	0	0	0	0	0	81	-6.35755
gypsy-23_dwil base	LTR	Gypsy	0	0	0	0	0	0	0	79	-6.32193	0	0	0
bel-5_dya base	LTR	Pao	199	2632	-3.82375	76	3708	-5.61929	0	3661	-11.8384	0	4158	-12.022
polinton-2_dk base	DNA	Maverick	0	52	-5.72792	0	53	-5.75489	0	106	-6.74147	0	0	0
homo8 base	DNA	hAT-Ac	0	94	-6.56986	0	74	-6.22882	0	0	0	0	82	-6.37504
dmrp1 base	Other	Other	0	13031	-13.6698	87	14320	-7.35515	87	14475	-7.37059	0	12912	-13.6565
gypsy-17_dwil base	LTR	Gypsy	0	0	0	0	0	0	0	0	0	0	77	-6.2854
jockey-4_df base	Non-LTR_retrotransposon	Jockey	0	78	-6.30378	0	0	0	0	0	0	0	77	-6.2854
r1-1_dgr base	Non-LTR_retrotransposon	R1	0	0	0	0	0	0	0	0	0	0	77	-6.2854
jockey-1_dvi base	Non-LTR_retrotransposon	Jockey	0	54	-5.78136	0	0	0	0	88	-6.47573	0	66	-6.06609
jockey-7_drh base	Non-LTR_retrotransposon	Jockey	0	993	-9.9571	732	85	-0.158288	0	85	-6.42626	0	85	-6.42626
bel-6_dpe base	LTR	Pao	0	0	0	0	76	-6.26679	0	0	0	0	0	0
gypsy-32_dp base	LTR	Gypsy	0	0	0	0	76	-6.26679	0	0	0	0	0	0
gypsy-54_dwil base	LTR	Gypsy	0	56	-5.83289	0	0	0	0	0	0	0	76	-6.26679
bel-1_dper base	LTR	Pao	0	2914	-11.5093	0	2151	-11.0715	85	2009	-4.60647	0	1602	-10.6466
kiri-3_dk base	Non-LTR_retrotransposon	L2	0	53	-5.75489	0	0	0	0	107	-6.75489	0	48	-5.61471
gypsy-8_drh base	LTR	Gypsy	0	66	-6.06609	0	0	0	0	75	-6.24793	0	0	0
i-7_dbp base	Non-LTR_retrotransposon	I	0	0	0	0	0	0	0	75	-6.24793	0	0	0
cr1-3_dwi base	Non-LTR_retrotransposon	CR1	0	0	0	0	0	0	0	77	-6.2854	0	73	-6.20945
bel-3_dvir base	LTR	Pao	408	1665	-2.34224	0	1444	-10.4969	122	2458	-4.3912	75	1265	-4.14117
hat-10_dbp base	DNA	hAT-hobo	0	0	0	0	0	0	0	95	-6.58496	0	55	-5.80735
bel-1_dki base	LTR	Pao	0	0	0	0	60	-5.93074	0	0	0	0	87	-6.45943
gypsy6 base	LTR	Gypsy	0	87767	-16.4214	0	73	-6.20945	0	0	0	0	0	0
hat-5n1_dk base	DNA	hAT-hobo	0	241	-7.91886	0	0	0	0	73	-6.20945	0	0	0
gypsy-24_dan base	LTR	Gypsy	0	169	-7.40939	0	62	-5.97728	0	0	0	0	84	-6.40939
dbusck2cons base	DNA	TcMar-Mariner	0	0	0	0	49	-5.64386	0	0	0	0	99	-6.64386
cr1-4_dk base	Non-LTR_retrotransposon	CR1	0	249	-7.96578	0	37	-5.24793	0	0	0	0	114	-6.84549
gypsy-3_dbp base	LTR	Gypsy	0	0	0	0	72	-6.18982	0	0	0	0	0	0
hat-3_dk base	DNA	hAT-Ac	0	0	0	0	101	-6.67243	0	46	-5.55459	0	0	0
hat-7_dbp base	DNA	hAT-hobo	0	0	0	0	0	0	0	70	-6.14975	0	71	-6.16993
jockey-9_dbp base	Non-LTR_retrotransposon	Jockey	0	60	-5.93074	0	0	0	0	55	-5.80735	0	87	-6.45943
gypsy-1_dfi base	LTR	Gypsy	0	0	0	0	70	-6.14975	0	0	0	0	0	0
jockey-4_drh base	Non-LTR_retrotransposon	Jockey	55	0	0	0	0	0	0	70	-6.14975	0	0	0
r1-2_dgr base	Non-LTR_retrotransposon	R1	0	0	0	0	70	-6.14975	0	0	0	0	0	0
cr1-3_dk base	Non-LTR_retrotransposon	CR1	0	0	0	0	87	-6.45943	0	0	0	0	52	-5.72792
cr1-2_dk base	Non-LTR_retrotransposon	CR1	0	51	-5.70044	0	54	-5.78136	0	0	0	0	83	-6.39232
hat-n1_dbp base	DNA	hAT-Ac	0	0	0	0	68	-6.10852	0	0	0	0	68	-6.10852
jockey-2_df base	Non-LTR_retrotransposon	Jockey	0	0	0	0	0	0	0	68	-6.10852	0	0	0
r1-2_dan base	Non-LTR_retrotransposon	R1	0	0	0	0	0	0	0	0	0	0	68	-6.10852
tom base	LTR	Gypsy	0	67	-6.08746	0	0	0	0	0	0	0	68	-6.10852
gypsy-3_dan base	LTR	Gypsy	0	0	0	0	0	0	0	79	-6.32193	0	57	-5.85798
jockey-14_dan base	Non-LTR_retrotransposon	Jockey	0	0	0	0	44	-5.49185	0	0	0	0	94	-6.56986
gypsy-5_del base	LTR	Gypsy	0	1969	-10.944	99	2884	-4.89918	0	1346	-10.3955	166	2213	-3.83304
dsim_rdna_ets base	rDNA	rDNA	0	0	0	1514	0	0	2604	174983	-6.09111	1240	0	0
bel-12_dta base	LTR	Pao	0	47	-5.58496	0	67	-6.08746	0	0	0	0	0	0
bel-13_dan base	LTR	Pao	0	0	0	0	66	-6.06609	0	0	0	0	0	0
bel-6_dwil base	LTR	Pao	0	91	-6.52356	0	66	-6.06609	0	0	0	0	0	0
i-3_dya base	Non-LTR_retrotransposon	I	0	0	0	0	66	-6.06609	0	0	0	0	0	0
jockey-11b_dbp base	Non-LTR_retrotransposon	Jockey	0	44	-5.49185	0	66	-6.06609	0	0	0	0	0	0
mariner-1_deu base	DNA	TcMar-Tc1	0	0	0	0	0	0	0	0	0	0	66	-6.06609
transib-3_dan base	DNA	CMC-Transib	0	0	0	0	0	0	0	0	0	0	66	-6.06609
transib-4_df base	DNA	CMC-Transib	0	0	0	0	0	0	0	66	-6.06609	0	0	0
bel-15_dan base	LTR	Pao	0	0	0	0	0	0	0	52	-5.72792	0	80	-6.33985
piggybac-3_dan base	DNA	PiggyBac	0	58	-5.88264	0	0	0	0	63	-6	0	68	-6.10852
transib2_dp base	DNA	CMC-Transib	0	145	-7.18982	0	225	-7.82018	0	84	-6.40939	102	132	-1.19002
cr1-7_dt base	Non-LTR_retrotransposon	CR1	0	0	0	0	0	0	0	0	0	0	65	-6.04439
transib-4_dk base	DNA	CMC-Transib	0	0	0	0	65	-6.04439	0	65	-6.04439	0	0	0
gypsy10_dya base	LTR	Gypsy	0	5778	-12.4966	101	6738	-6.06736	0	5838	-12.5115	0	3117	-11.6064
hat-1_df base	DNA	hAT-hobo	0	0	0	0	45	-5.52356	0	0	0	0	85	-6.42626
r1-3_dbp base	Non-LTR_retrotransposon	R1	0	45	-5.52356	0	0	0	0	85	-6.42626	0	45	-5.52356
gypsy-5_dper base	LTR	Gypsy	0	104	-6.71425	0	0	0	0	0	0	0	64	-6.02237
mariner-5_dy base	DNA	TcMar-Tc1	0	0	0	0	64	-6.02237	0	0	0	0	64	-6.02237
bel-9_del base	LTR	Pao	0	0	0	0	0	0	0	63	-6	0	0	0
gypsy-17_dbp base	LTR	Gypsy	0	98	-6.62936	0	63	-6	0	0	0	0	0	0
kiri-1_dbi base	Non-LTR_retrotransposon	L2	0	0	0	0	60	-5.93074	0	66	-6.06609	0	0	0
bel-11_dan base	LTR	Pao	0	62	-5.97728	0	0	0	0	62	-5.97728	0	62	-5.97728
i-2_dk base	Non-LTR_retrotransposon	I	0	0	0	0	62	-5.97728	0	0	0	0	0	0
jockey-5_dta base	Non-LTR_retrotransposon	Jockey	0	0	0	0	0	0	0	0	0	0	62	-5.97728
mariner-1_dvi base	DNA	TcMar-Tc1	0	0	0	0	0	0	0	0	0	0	62	-5.97728
mariner-2_dan base	DNA	TcMar-Tc1	0	0	0	0	62	-5.97728	0	0	0	0	0	0
r1-12_dwi base	Non-LTR_retrotransposon	R1	0	0	0	0	0	0	0	62	-5.97728	0	0	0
gypsy-10_dper base	LTR	Gypsy	0	0	0	0	0	0	0	0	0	0	61	-5.9542
mariner-8_del base	DNA	TcMar-Mariner	0	0	0	0	61	-5.9542	0	0	0	0	0	0
harbinger-1_dk base	DNA	PIF-Harbinger	0	0	0	0	63	-6	0	59	-5.90689	0	0	0
osvaldo base	LTR	Gypsy	0	0	0	0	0	0	0	61	-5.9542	0	60	-5.93074
bel-15_dwil base	LTR	Pao	0	51	-5.70044	0	60	-5.93074	0	0	0	0	0	0
cr1-3_dbp base	Non-LTR_retrotransposon	CR1	0	0	0	0	0	0	0	0	0	0	60	-5.93074
gypsy-4_dta base	LTR	Gypsy	0	0	0	0	0	0	0	60	-5.93074	0	0	0
gypsy_dg base	LTR	Gypsy	0	0	0	0	60	-5.93074	0	0	0	0	0	0
jockey-4_dt base	Non-LTR_retrotransposon	Jockey	0	0	0	0	0	0	0	60	-5.93074	0	60	-5.93074
gypsy-15_dan base	LTR	Gypsy	0	52	-5.72792	0	59	-5.90689	0	0	0	0	0	0
hat-5n1_drh base	DNA	hAT-Ac	0	0	0	0	0	0	0	59	-5.90689	0	0	0
r1-2_dwi base	Non-LTR_retrotransposon	R1	0	53	-5.75489	0	59	-5.90689	0	0	0	0	0	0
transib-2_del base	DNA	CMC-Transib	0	0	0	0	0	0	0	59	-5.90689	0	0	0
worf_dmi base	Non-LTR_retrotransposon	CR1	0	110	-6.79442	0	46	-5.55459	0	71	-6.16993	0	0	0
chapaev3-1_dw base	DNA	CMC-Chapaev-3	0	0	0	0	58	-5.88264	0	0	0	0	58	-5.88264
copia-2_dwil base	LTR	Copia	1826	0	0	0	58	-5.88264	1606	0	0	0	0	0
gypsy-2_dwil base	LTR	Gypsy	0	223	-7.80735	0	0	0	0	58	-5.88264	0	0	0
gypsy-4_dfi base	LTR	Gypsy	0	0	0	245	0	0	0	0	0	0	58	-5.88264
helitron-1_dbp base	RC	Helitron	0	0	0	0	0	0	0	58	-5.88264	0	0	0
jockey-7_dan base	Non-LTR_retrotransposon	Jockey	0	85	-6.42626	0	0	0	0	58	-5.88264	0	0	0
rtex-1_drh base	LTR	RTEX	0	0	0	0	58	-5.88264	0	58	-5.88264	0	0	0
mariner-18_df base	DNA	TcMar-Tc1	0	0	0	0	74	-6.22882	0	0	0	0	42	-5.42626
copia-4_dmoj base	LTR	Copia	0	70	-6.14975	0	0	0	0	57	-5.85798	0	57	-5.85798
cr1-4_dan base	Non-LTR_retrotransposon	CR1	0	57	-5.85798	0	57	-5.85798	0	0	0	0	0	0
gypsy-4_del base	LTR	Gypsy	0	146	-7.19967	0	0	0	0	57	-5.85798	0	0	0
gypsy1_dv base	LTR	Gypsy	0	0	0	0	0	0	0	0	0	0	57	-5.85798
kiri-2_del base	Non-LTR_retrotransposon	L2	0	0	0	0	0	0	0	57	-5.85798	0	0	0
r1-2_dvi base	Non-LTR_retrotransposon	R1	0	0	0	0	0	0	0	0	0	0	57	-5.85798
r2-2_dwi base	Non-LTR_retrotransposon	R2	0	0	0	0	0	0	0	57	-5.85798	0	57	-5.85798
bel-1_dfi base	LTR	Pao	0	55	-5.80735	0	56	-5.83289	0	0	0	0	0	0
gypsy-3_dwil base	LTR	Gypsy	0	197	-7.62936	0	0	0	0	0	0	0	56	-5.83289
homo4 base	DNA	hAT-hobo	0	0	0	0	0	0	0	0	0	0	56	-5.83289
jockey-2_dt base	Non-LTR_retrotransposon	Jockey	0	0	0	0	58	-5.88264	0	54	-5.78136	0	0	0
gypsy-6_del base	LTR	Gypsy	0	178	-7.48382	32	265	-3.17477	64	682	-3.5226	0	573	-9.16491
gypsy-18_dan base	LTR	Gypsy	928	2660	-1.94983	0	0	0	0	103	-6.70044	351	3982	-3.62205
chapaev3-1_da base	DNA	CMC-Chapaev-3	0	0	0	0	55	-5.80735	0	0	0	0	55	-5.80735
jockey-11_df base	Non-LTR_retrotransposon	Jockey	0	2612	-11.3515	1780	0	0	0	0	0	0	55	-5.80735
jockey-7_dper base	Non-LTR_retrotransposon	Jockey	0	0	0	0	55	-5.80735	0	55	-5.80735	0	0	0
r1-3_dvi base	Non-LTR_retrotransposon	R1	0	0	0	0	0	0	0	0	0	0	55	-5.80735
transib-3_dbp base	DNA	CMC-Transib	0	0	0	0	0	0	0	0	0	0	55	-5.80735
bel-11_del base	LTR	Pao	34	10025	-8.16706	50	8887	-7.45331	51	6588	-6.99653	0	8289	-13.0172
r1-4_dya base	Non-LTR_retrotransposon	R1	0	5149	-12.3304	0	318	-8.31741	49	991	-4.3799	509	1095	-1.654
bel-8_dan base	LTR	Pao	0	0	0	0	48	-5.61471	0	61	-5.9542	0	0	0
jockey-11_dbp base	Non-LTR_retrotransposon	Jockey	0	59	-5.90689	0	54	-5.78136	0	0	0	0	0	0
mariner-3_dbp base	DNA	TcMar-Tc1	0	0	0	0	54	-5.78136	0	0	0	0	0	0
transib-3_dk base	DNA	CMC-Transib	0	0	0	0	0	0	0	0	0	0	54	-5.78136
gypsy-25_dwil base	LTR	Gypsy	0	0	0	0	0	0	0	0	0	0	53	-5.75489
gypsy-32_dya base	LTR	Gypsy	0	62	-5.97728	0	0	0	0	53	-5.75489	0	0	0
homo7 base	DNA	hAT-Ac	0	0	0	0	0	0	0	0	0	0	53	-5.75489
outcast-2_dbp base	Non-LTR_retrotransposon	Jockey	0	0	0	0	0	0	0	0	0	0	53	-5.75489
cr1-1_deu base	Non-LTR_retrotransposon	CR1	0	97	-6.61471	39	40	-1	0	71	-6.16993	39	0	0
gypsy11_dya base	LTR	Gypsy	0	21509	-14.3927	0	15715	-13.9399	41	16743	-8.64257	0	27239	-14.7334
harbinger-1n1_df base	DNA	PIF-Harbinger	0	0	0	0	0	0	0	52	-5.72792	0	0	0
jockey-2_dbp base	Non-LTR_retrotransposon	Jockey	0	78	-6.30378	0	0	0	0	52	-5.72792	0	0	0
r1-1_drh base	Non-LTR_retrotransposon	R1	0	52	-5.72792	0	0	0	0	52	-5.72792	0	52	-5.72792
gypsy-9_dwil base	LTR	Gypsy	0	0	0	0	66	-6.06609	0	38	-5.2854	0	0	0
bel-16_dta base	LTR	Pao	0	43	-5.45943	0	0	0	0	0	0	0	51	-5.70044
bel-20_dan base	LTR	Pao	0	0	0	0	0	0	0	0	0	0	51	-5.70044
cr1-1_dvi base	Non-LTR_retrotransposon	CR1	0	0	0	0	0	0	0	0	0	0	51	-5.70044
gypsy-4_dbp base	LTR	Gypsy	0	0	0	0	0	0	0	0	0	0	51	-5.70044
kiri-2_dta base	Non-LTR_retrotransposon	L2	0	0	0	0	0	0	0	0	0	0	51	-5.70044
gypsy5_dmoj base	LTR	Gypsy	0	77	-6.2854	0	0	0	0	55	-5.80735	0	47	-5.58496
gypsy-58_dwil base	LTR	Gypsy	0	0	0	0	50	-5.67243	0	0	0	0	50	-5.67243
transib-3_dbi base	DNA	CMC-Transib	0	38	-5.2854	0	0	0	0	0	0	0	49	-5.64386
transib1_dmoj base	DNA	CMC-Transib	0	0	0	0	49	-5.64386	0	49	-5.64386	0	0	0
bel-2_dta base	LTR	Pao	0	102	-6.6865	0	48	-5.61471	0	0	0	0	0	0
homo5 base	DNA	hAT-Ac	0	48	-5.61471	0	48	-5.61471	0	48	-5.61471	0	0	0
jockey-1_drh base	Non-LTR_retrotransposon	Jockey	0	0	0	0	0	0	0	48	-5.61471	0	0	0
transib-5_dan base	DNA	CMC-Transib	0	0	0	0	0	0	0	0	0	0	48	-5.61471
gypsy-8_dan base	LTR	Gypsy	0	228	-7.8392	72	1271	-4.20249	0	116	-6.87036	0	1585	-10.6312
bel-11_dwil base	LTR	Pao	0	83	-6.39232	0	0	0	0	47	-5.58496	0	47	-5.58496
cr1-2_dbp base	Non-LTR_retrotransposon	CR1	0	0	0	0	0	0	0	0	0	0	47	-5.58496
gypsy-27_dan base	LTR	Gypsy	0	90	-6.50779	0	0	0	0	47	-5.58496	0	0	0
gypsy-33_dwil base	LTR	Gypsy	0	66	-6.06609	0	0	0	0	0	0	0	47	-5.58496
r2_dya base	Non-LTR_retrotransposon	R2	0	73	-6.20945	0	42	-5.42626	0	0	0	0	52	-5.72792
bel-15_dta base	LTR	Pao	0	217	-7.76818	0	44	-5.49185	0	0	0	0	49	-5.64386
bel-3_dgri base	LTR	Pao	0	0	0	0	0	0	0	46	-5.55459	0	0	0
cr1-4_dwi base	Non-LTR_retrotransposon	CR1	0	0	0	0	46	-5.55459	0	46	-5.55459	0	0	0
loa-2_dgri base	Non-LTR_retrotransposon	LOA	0	54	-5.78136	0	0	0	0	0	0	0	46	-5.55459
outcast-1_dt base	Non-LTR_retrotransposon	Jockey	0	46	-5.55459	0	0	0	0	46	-5.55459	0	46	-5.55459
dsim_rdna_its2 base	rDNA	rDNA	141	0	0	0	96	-6.59991	770	77558	-6.66667	385	433	-1.08526
gypsy-16_dwil base	LTR	Gypsy	0	34	-5.12928	0	68	-6.10852	0	34	-5.12928	329	34	-0.141472
bel-19_dwil base	LTR	Pao	0	0	0	0	0	0	0	0	0	0	45	-5.52356
gypsy-11_drh base	LTR	Gypsy	0	170	-7.41785	0	0	0	0	45	-5.52356	0	0	0
mariner-10_drh base	DNA	TcMar-Tc1	0	0	0	0	45	-5.52356	0	0	0	0	0	0
copia-2_del base	LTR	Copia	212	258	-1.14487	0	42	-5.42626	0	0	0	0	48	-5.61471
i-6_dbp base	Non-LTR_retrotransposon	I	0	54	-5.78136	0	45	-5.52356	0	44	-5.49185	0	0	0
bel-14_dwil base	LTR	Pao	0	0	0	0	44	-5.49185	0	0	0	0	0	0
gypsy-13_dbp base	LTR	Gypsy	0	0	0	0	0	0	0	0	0	0	44	-5.49185
gypsy-39_dan base	LTR	Gypsy	0	0	0	0	0	0	0	44	-5.49185	0	0	0
i-4_dya base	Non-LTR_retrotransposon	I	0	0	0	0	44	-5.49185	0	0	0	0	0	0
bel-8_dpe base	LTR	Pao	0	47	-5.58496	0	41	-5.39232	0	46	-5.55459	0	0	0
gypsy-5_deu base	LTR	Gypsy	0	0	0	0	32	-5.04439	0	55	-5.80735	0	0	0
howilli2 base	DNA	hAT-hobo	0	134	-7.07682	0	0	0	0	0	0	0	43	-5.45943
polinton-2_deu base	DNA	Maverick	0	108	-6.76818	0	0	0	0	43	-5.45943	0	0	0
transib-1_dan base	DNA	CMC-Transib	0	0	0	0	43	-5.45943	0	0	0	0	0	0
bel-6_dper base	LTR	Pao	0	0	0	0	0	0	0	0	0	0	42	-5.42626
transib-2_dw base	DNA	CMC-Transib	0	0	0	0	0	0	0	0	0	0	42	-5.42626
transibn4_dp base	DNA	CMC-Transib	0	0	0	0	42	-5.42626	0	0	0	0	0	0
r1-4_dbp base	Non-LTR_retrotransposon	R1	0	0	0	0	0	0	0	0	0	0	41	-5.39232
i-6_dbi base	Non-LTR_retrotransposon	I	0	0	0	0	40	-5.35755	0	0	0	0	40	-5.35755
gypsy-50_dwil base	LTR	Gypsy	0	1496	-10.5479	0	775	-9.59991	0	715	-9.48382	64	1131	-4.20163
gypsy-10_dan base	LTR	Gypsy	0	185	-7.53916	169	77	-0.538976	0	0	0	0	47	-5.58496
transib-1_dbp base	DNA	CMC-Transib	0	0	0	0	51	-5.70044	0	0	0	0	28	-4.85798
copia-1_dper base	LTR	Copia	0	0	0	0	39	-5.32193	0	39	-5.32193	0	0	0
dna-2_dbp base	DNA	DNA	0	0	0	0	39	-5.32193	0	0	0	0	0	0
gypsy-46_del base	LTR	Gypsy	0	283	-8.14975	0	42	-5.42626	401	40	-0.136851	5468	302	-0.0775443
bel-3_dwil base	LTR	Pao	0	550	-9.10591	0	38	-5.2854	0	0	0	0	0	0
r1-17_dwi base	Non-LTR_retrotransposon	R1	0	0	0	0	38	-5.2854	0	0	0	0	38	-5.2854
bel-12_dbp base	LTR	Pao	0	0	0	0	37	-5.24793	0	37	-5.24793	0	0	0
r1-6_dk base	Non-LTR_retrotransposon	R1	0	0	0	0	0	0	0	36	-5.20945	0	0	0
gypsy-11_dbi base	LTR	Gypsy	0	0	0	0	0	0	0	0	0	0	35	-5.16993
gypsy-1_dki base	LTR	Gypsy	0	0	0	0	0	0	0	0	0	0	35	-5.16993
jockey-10_dan base	Non-LTR_retrotransposon	Jockey	0	0	0	0	0	0	0	35	-5.16993	40	0	0
r1-2_df base	Non-LTR_retrotransposon	R1	0	0	0	0	0	0	0	35	-5.16993	0	0	0
bel-16_dwil base	LTR	Pao	0	0	0	0	0	0	0	0	0	0	32	-5.04439
cr1-4_drh base	Non-LTR_retrotransposon	CR1	0	206	-7.69349	0	0	0	0	0	0	0	32	-5.04439
cr1-1_df base	Non-LTR_retrotransposon	CR1	120	102	-0.882037	0	0	0	0	31	-5	0	0	0
mariner-2_df base	DNA	TcMar-Mariner	0	0	0	0	0	0	0	42	-5.42626	1055	1102	-1.03109
bel-5_deu base	LTR	Pao	0	104	-6.71425	88	42	-0.55769	0	42	-5.42626	88	4150	-5.57377
pogo base	DNA	TcMar-Pogo	859	37627	-5.48389	0	30	-4.9542	0	0	0	0	29	-4.90689
mariner-11_df base	DNA	TcMar-Tc1	0	82	-6.37504	0	0	0	109	49	-0.531523	0	34	-5.12928
gypsy-2_dgri base	LTR	Gypsy	0	401	-8.65105	465	0	0	722	0	0	0	28	-4.85798
gypsy-63_dwil base	LTR	Gypsy	0	31	-5	0	31	-5	167	31	-0.244307	0	31	-5
bel-13_dwil base	LTR	Pao	0	769	-9.58871	0	0	0	0	0	0	0	26	-4.75489
r1-5_dya base	Non-LTR_retrotransposon	R1	0	13175	-13.6856	234	7213	-4.98612	75	7827	-6.70026	5253	9150	-1.45498
gypsy-29_del base	LTR	Gypsy	31	89	-1.91886	31	70	-1.67243	0	75	-6.24793	39	102	-1.82782
copia-2_dki base	LTR	Copia	0	926	-9.85643	0	86	-6.44294	0	86	-6.44294	0	1956	-10.9344
bel-8_dmo base	LTR	Pao	0	179	-7.49185	0	40	-5.35755	0	40	-5.35755	0	877	-9.77808
homo11 base	DNA	hAT-hobo	0	115	-6.85798	0	1174	-10.1984	0	57	-5.85798	0	57	-5.85798
gypsy-11_dta base	LTR	Gypsy	0	164	-7.36632	2932	1181	-0.488165	19	680	-5.12928	555	996	-1.48097
gypsy-32_dwil base	LTR	Gypsy	0	63	-6	0	953	-9.89785	0	62	-5.97728	0	1155	-10.1749
gypsy15_dpse base	LTR	Gypsy	0	299	-8.22882	0	35	-5.16993	0	890	-9.79928	0	164	-7.36632
gypsy-54_del base	LTR	Gypsy	0	993	-9.9571	0	58	-5.88264	0	941	-9.87958	0	58	-5.88264
rsp-like_sat base	Satellite	Satellite	0	6704	-12.711	0	41215	-15.3309	0	130983	-16.999	0	963689	-19.8782
copia-4_dgri base	LTR	Copia	0	338	-8.40514	0	1848	-10.8525	0	869	-9.76487	0	89	-6.49185
gypsy-17_dbi base	LTR	Gypsy	0	161	-7.33985	0	129	-7.02237	0	203	-7.67243	0	2329	-11.1861
gypsy-46_dwil base	LTR	Gypsy	0	215	-7.75489	0	1561	-10.6092	0	993	-9.9571	0	89	-6.49185
bel-3_deu base	LTR	Pao	0	2999	-11.5507	0	47	-5.58496	0	667	-9.3837	0	685	-9.42206
gypsy11_dpse base	LTR	Gypsy	0	187	-7.55459	99	1977	-4.37643	112	217	-1.54614	0	55	-5.80735
gypsy-1_dbi base	LTR	Gypsy	0	907	-9.82655	0	5143	-12.3287	0	368	-8.52748	0	393	-8.62205
gypsy-24_dwil base	LTR	Gypsy	0	4384	-12.0984	0	98	-6.62936	0	852	-9.7364	0	1743	-10.7682
gypsy-28_dbp base	LTR	Gypsy	0	1099	-10.1033	283	6957	-4.67223	1305	4738	-2.21035	62	5543	-6.47548
copia-7_dan base	LTR	Copia	970	0	0	0	86	-6.44294	0	1532	-10.5821	0	673	-9.3966
gypsy-24_dy base	LTR	Gypsy	0	38866	-15.2463	0	10258	-13.3246	0	4495	-12.1344	13	8272	-9.20911
cr1-6_dt base	Non-LTR_retrotransposon	CR1	0	310	-8.28077	0	49	-5.64386	0	364	-8.51175	0	846	-9.72622
bel2_dmoj base	LTR	Pao	213	512	-1.76236	0	1096	-10.0993	0	67	-6.08746	0	227	-7.83289
jockey-9_drh base	Non-LTR_retrotransposon	Jockey	0	0	0	0	86	-6.44294	0	540	-9.07948	0	1312	-10.3587
gypsy-16_del base	LTR	Gypsy	0	0	0	0	0	0	328	262	-0.845071	364	4271	-3.66691
dodeca_sat base	Satellite	Satellite	0	569534	-19.1194	1687	163485	-6.61252	488	594570	-10.249	592	98189	-7.38007
mariner-9_del base	DNA	TcMar-Tc1	0	1827	-10.8361	0	1466	-10.5187	0	139	-7.12928	0	1279	-10.3219
gypsy-6_dta base	LTR	Gypsy	0	5324	-12.3786	0	8082	-12.9807	0	4157	-12.0217	0	639	-9.32193
gypsy-9_del base	LTR	Gypsy	131	1513	-3.63948	134	338	-1.80888	79	597	-3.08108	67	2872	-5.43414
gypsy2_dv base	LTR	Gypsy	264	137	-0.601203	985	261	-0.338802	415	261	-0.702572	40	485	-3.68137
gypsy-47_dwil base	LTR	Gypsy	0	0	0	0	383	-8.58496	0	31	-5	0	70	-6.14975
gypsy-35_dan base	LTR	Gypsy	0	147	-7.20945	0	2189	-11.0967	0	185	-7.53916	0	566	-9.1472
jockey-4_dk base	Non-LTR_retrotransposon	Jockey	0	138	-7.11894	0	44	-5.49185	0	452	-8.82337	0	295	-8.20945
gypsy4_dya base	LTR	Gypsy	0	23974	-14.5492	4713	14081	-1.99533	405	18148	-5.51411	2227	21148	-3.39121
gypsy-51_dwil base	LTR	Gypsy	0	0	0	0	1745	-10.7698	0	207	-7.70044	0	1678	-10.7134
gypsy-42_del base	LTR	Gypsy	0	0	0	0	38	-5.2854	0	92	-6.53916	0	418	-8.71081
gypsy-7_dta base	LTR	Gypsy	0	40	-5.35755	0	317	-8.31288	0	33	-5.08746	0	182	-7.5157
jockey-3_dbp base	Non-LTR_retrotransposon	Jockey	0	665	-9.37938	1307	1783	-1.24071	328	3091	-3.37784	4678	374	-0.11094
mariner_dma base	DNA	TcMar-Mariner	0	0	0	7710	26160	-2.13506	369	7710	-4.44876	1274	1734	-1.23879
bel-1_dbp base	LTR	Pao	0	512	-9.00282	2380	1933	-0.857459	95	1203	-3.75822	3072	2931	-0.966276
jockey-1_deu base	Non-LTR_retrotransposon	Jockey	0	0	0	0	55	-5.80735	0	391	-8.61471	0	403	-8.65821
rehavkus-1_dy base	DNA	MULE-NOF	152	3306	-4.49875	0	2527	-11.3038	0	5678	-12.4714	0	631	-9.30378
i-3_df base	Non-LTR_retrotransposon	I	0	1183	-10.2095	0	68	-6.10852	0	527	-9.04439	0	408	-8.67596
bel-13_dta base	LTR	Pao	0	232	-7.86419	0	2888	-11.4964	0	2990	-11.5464	0	443	-8.79442
copia-1_deu base	LTR	Copia	0	0	0	0	530	-9.05257	0	168	-7.40088	0	60	-5.93074
gypsy-5_dwil base	LTR	Gypsy	0	466	-8.86728	0	190	-7.57743	0	645	-9.33539	0	80	-6.33985
kiri-1_del base	Non-LTR_retrotransposon	L2	0	38	-5.2854	0	38	-5.2854	0	312	-8.29002	0	104	-6.71425
homo1 base	DNA	hAT-hobo	0	1602	-10.6466	0	313	-8.29462	0	39	-5.32193	0	89	-6.49185
bel-19_dan base	LTR	Pao	2059	4828	-1.74144	1852	1053	-0.649172	1881	1443	-0.821088	250	2249	-3.31617
bel-22_dan base	LTR	Pao	0	73	-6.20945	0	407	-8.67243	0	284	-8.15482	0	58	-5.88264
transib-4_drh base	DNA	CMC-Transib	0	55	-5.80735	0	1212	-10.2444	0	1841	-10.8471	0	272	-8.09276
uvir_dv base	Non-LTR_retrotransposon	Jockey	0	295	-8.20945	0	57	-5.85798	0	346	-8.43879	0	311	-8.2854
gypsy-10_dfi base	LTR	Gypsy	0	0	0	0	46	-5.55459	0	283	-8.14975	0	237	-7.89482
nocat_dsim_final-b-p113.23-map3_novel_repeat base	Other	de_novo	565	2613	-2.4897	114	3568	-5.00118	893	3180	-2.1881	276	4106	-3.98396
dmltr5 base	LTR	Gypsy	0	15026	-13.8753	227	14890	-6.05109	980	8205	-3.22711	321	7574	-4.61599
mariner-16_dk base	DNA	TcMar-Tc1	0	0	0	0	288	-8.17493	0	54	-5.78136	0	54	-5.78136
transib-1_drh base	DNA	CMC-Transib	483	24811	-5.7077	1600	28621	-4.23855	249	29619	-6.90058	445	31909	-6.1808
copia-29_dp base	LTR	Copia	2682	2113	-0.837985	0	0	0	275	769	-1.92076	404	2094	-2.62536
gypsy-57_dwil base	LTR	Gypsy	0	18	-4.24793	341	207	-0.68281	78	507	-2.89098	122	960	-3.1383
bel-3_dbi base	LTR	Pao	0	83	-6.39232	0	68	-6.10852	0	240	-7.91289	0	38	-5.2854
bel-2_dgri base	LTR	Pao	0	0	0	0	348	-8.44708	0	76	-6.26679	0	420	-8.71768
gypsy-34_dwil base	LTR	Gypsy	0	0	0	0	958	-9.90539	0	1235	-10.2715	0	221	-7.79442
gypsy-26_del base	LTR	Gypsy	192	70	-0.446462	476	145	-0.382925	621	78	-0.17044	113	570	-2.58496
bari1 base	DNA	TcMar-Tc1	76	8191	-6.74654	998	28822	-4.8997	547	2169	-2.30977	248	3191	-3.78819
jockey-1_dan base	Non-LTR_retrotransposon	Jockey	74	496	-2.92853	0	88	-6.47573	0	116	-6.87036	0	472	-8.8857
copia-6_dwil base	LTR	Copia	0	972	-9.9263	137	508	-2.22687	0	0	0	67	0	0
bel-13_dp base	LTR	Pao	3545	3002	-0.884862	1996	703	-0.435125	834	4543	-2.68722	2453	1265	-0.599779
mariner-10_del base	DNA	TcMar-Tc1	0	0	0	0	341	-8.41785	0	389	-8.60733	0	81	-6.35755
jockey-11_dan base	Non-LTR_retrotransposon	Jockey	0	38	-5.2854	0	75	-6.24793	0	333	-8.3837	0	340	-8.41363
transib-4_dan base	DNA	CMC-Transib	0	37	-5.24793	0	1564	-10.6119	0	785	-9.61839	0	4338	-12.0831
gypsy6_dpse base	LTR	Gypsy	0	121	-6.93074	0	173	-7.44294	0	40	-5.35755	0	183	-7.52356
helena_rt base	Non-LTR_retrotransposon	Jockey	581	4452	-3.11261	2270	3471	-1.33823	5160	2925	-0.647776	800	5634	-3.00607
jockey2 base	Non-LTR_retrotransposon	Jockey	0	52910	-15.6913	884	25519	-4.89894	4255	30298	-3.02128	1245	47359	-5.28573
gypsy-62_dwil base	LTR	Gypsy	0	105	-6.72792	1756	393	-0.291222	666	163	-0.315425	97	418	-2.39652
bel-4_dfi base	LTR	Pao	0	29237	-14.8356	1057	34948	-5.08883	185	30540	-7.36801	763	35295	-5.56064
gypsy-37_dan base	LTR	Gypsy	0	95	-6.58496	0	43	-5.45943	0	147	-7.20945	0	215	-7.75489
gypsy-7_dfi base	LTR	Gypsy	0	8187	-12.9993	0	5803	-12.5028	0	2262	-11.144	0	1120	-10.1306
gypsy-28_del base	LTR	Gypsy	0	0	0	0	427	-8.74147	0	1361	-10.4115	0	276	-8.11374
nocat_dsim_final-b-p81.43-map3_novel_repeat base	Other	de_novo	663	11474	-4.1922	1696	14242	-3.2315	268	12535	-5.57284	1356	22586	-4.14111
jockey-6_df base	Non-LTR_retrotransposon	Jockey	0	475	-8.89482	49	304	-2.82375	49	111	-1.68706	120	46	-0.464841
transib-11_dan base	DNA	CMC-Transib	0	546	-9.0954	0	786	-9.62022	0	494	-8.95128	0	162	-7.34873
r1-5_dk base	Non-LTR_retrotransposon	R1	0	3041	-11.5708	0	1319	-10.3663	0	621	-9.28077	0	3093	-11.5953
gypsy-28_dan base	LTR	Gypsy	0	1213	-10.2456	0	741	-9.53528	0	222	-7.8009	0	1003	-9.97154
hetrp_dm base	Satellite	Satellite	0	105672	-16.6892	0	23993	-14.5504	0	6867	-12.7457	0	29741	-14.8602
jockey-5_dk base	Non-LTR_retrotransposon	Jockey	0	1290	-10.3343	0	1359	-10.4094	0	1281	-10.3242	0	337	-8.40088
bel-4_dvir base	LTR	Pao	0	457	-8.8392	0	37	-5.24793	0	146	-7.19967	0	37	-5.24793
cr1-8_dta base	Non-LTR_retrotransposon	CR1	0	58	-5.88264	0	145	-7.18982	0	269	-8.07682	0	58	-5.88264
jockey-4_dvi base	Non-LTR_retrotransposon	Jockey	0	853	-9.73809	0	462	-8.85487	0	1711	-10.7415	0	451	-8.82018
r1b_dan base	Non-LTR_retrotransposon	R1	0	49	-5.64386	0	268	-8.07146	0	60	-5.93074	0	94	-6.56986
enspm-1_df base	DNA	CMC-Chapaev-3	0	91	-6.52356	0	81	-6.35755	0	47	-5.58496	0	214	-7.74819
bel-3_del base	LTR	Pao	2707	3629	-1.22657	1386	7647	-2.7034	261	6245	-4.63435	1167	7211	-2.84274
gypsy-32_del base	LTR	Gypsy	0	9623	-13.2324	0	1407	-10.4594	0	6117	-12.5788	0	2372	-11.2125
gypsy-8_dper base	LTR	Gypsy	0	790	-9.62753	0	100	-6.65821	0	30	-4.9542	0	118	-6.89482
gypsy24_dpse base	LTR	Gypsy	0	508	-8.99152	0	419	-8.71425	0	411	-8.6865	0	118	-6.89482
howilli1 base	DNA	hAT-Ac	0	0	0	0	362	-8.50383	0	1398	-10.4502	0	1115	-10.1241
hat-3_drh base	DNA	hAT-hobo	0	54	-5.78136	0	189	-7.56986	0	54	-5.78136	0	54	-5.78136
i-3_dk base	Non-LTR_retrotransposon	I	0	867	-9.76155	0	559	-9.12928	0	136	-7.09803	0	340	-8.41363
mariner-4_dbp base	DNA	TcMar-Tc1	0	5607	-12.4533	0	316	-8.30834	0	1298	-10.3432	0	765	-9.5812
transib-1_dbi base	DNA	CMC-Transib	0	678	-9.40727	0	167	-7.39232	0	77	-6.2854	0	40	-5.35755
gypsy-11_dper base	LTR	Gypsy	0	0	0	0	889	-9.79766	0	1824	-10.8337	0	447	-8.80735
gypsy-23_dy base	LTR	Gypsy	1033	271	-0.335814	0	4144	-12.0172	0	2462	-11.2662	0	9780	-13.2558
mariner-14_dk base	DNA	TcMar-Tc1	0	263	-8.04439	0	126	-6.98868	0	44	-5.49185	0	162	-7.34873
gypsy-31_dan base	LTR	Gypsy	0	0	0	0	88	-6.47573	0	278	-8.12412	0	298	-8.224
gypsy-45_dwil base	LTR	Gypsy	0	693	-9.43879	49	8999	-7.49969	96	6339	-6.05204	17	4352	-7.92349
gypsy-20_dbp base	LTR	Gypsy	116	20618	-7.46942	2036	0	0	3855	942	-0.315328	861	2191	-1.82447
gypsy17_dpse base	LTR	Gypsy	238	150	-0.70276	361	34	-0.129511	96	42	-0.519028	664	1952	-1.97649
gypsy12_dpse base	LTR	Gypsy	0	271	-8.08746	220	671	-2.013	209	93	-0.528928	181	752	-2.35948
r-rsp_sat base	Satellite	Rsp	0	100864	-16.6221	0	160	-7.33092	0	196	-7.62205	0	562	-9.13699
bel-10_dan base	LTR	Pao	0	84	-6.40939	0	61	-5.9542	0	235	-7.88264	0	114	-6.84549
bel-1_deu base	LTR	Pao	0	36	-5.20945	0	122	-6.94251	0	39	-5.32193	0	130	-7.03342
gypsy-3_dvir base	LTR	Gypsy	0	0	0	0	36	-5.20945	0	36	-5.20945	0	115	-6.85798
hat-1_dp base	DNA	hAT-Ac	0	84	-6.40939	0	322	-8.33539	0	495	-8.9542	0	135	-7.08746
mariner-5_del base	DNA	TcMar-Tc1	0	664	-9.37721	0	337	-8.40088	0	104	-6.71425	0	112	-6.82018
i-6_df base	Non-LTR_retrotransposon	I	0	697	-9.44708	0	3230	-11.6578	0	883	-9.7879	0	1624	-10.6662
g7_dm base	Non-LTR_retrotransposon	Jockey	74	3866	-5.71553	318	1332	-2.37171	305	552	-1.48745	159	1464	-3.34341
mariner-20_dk base	DNA	TcMar-Tc1	0	157	-7.30378	0	160	-7.33092	0	382	-8.5812	0	108	-6.76818
mariner-6_drh base	DNA	TcMar-Tc1	0	263	-8.04439	0	153	-7.26679	0	51	-5.70044	0	159	-7.32193
r1-9_dwi base	Non-LTR_retrotransposon	R1	0	37	-5.24793	0	37	-5.24793	0	129	-7.02237	0	86	-6.44294
gypsy_ds base	LTR	Gypsy	43	140	-2.06413	3183	179	-0.0789084	79	209	-1.853	150	209	-1.25345
gypsy-6_dfi base	LTR	Gypsy	3890	41	-0.0151223	0	6068	-12.5672	0	9946	-13.28	0	2883	-11.4939
gypsy-9_dta base	LTR	Gypsy	0	367	-8.52356	0	186	-7.54689	0	456	-8.83605	0	137	-7.10852
transib-9_dan base	DNA	CMC-Transib	0	0	0	0	275	-8.10852	0	114	-6.84549	0	82	-6.37504
bel-4_dbp base	LTR	Pao	0	37	-5.24793	0	76	-6.26679	0	37	-5.24793	0	130	-7.03342
r1-1_dya base	Non-LTR_retrotransposon	R1	0	5556	-12.4401	4773	713	-0.200819	1034	3022	-1.97078	1961	1989	-1.00989
bel-17_dta base	LTR	Pao	0	718	-9.48985	0	1382	-10.4336	0	3079	-11.5887	0	4544	-12.1501
het-a_dv base	Non-LTR_retrotransposon	Jockey	0	312	-8.29002	0	63	-6	0	169	-7.40939	0	55	-5.80735
hat-1n_dp base	DNA	hAT	0	382	-8.5812	0	243	-7.93074	0	138	-7.11894	0	72	-6.18982
spock_dmi base	Non-LTR_retrotransposon	Jockey	0	210	-7.7211	0	130	-7.03342	0	247	-7.9542	0	434	-8.76487
gypsy-5_der base	LTR	Gypsy	0	987	-9.94837	0	193	-7.59991	0	256	-8.00562	0	81	-6.35755
gypsy13_dpse base	LTR	Gypsy	359	5438	-4.00949	0	4326	-12.0792	0	9795	-13.258	0	13754	-13.7477
gypsy-9_dan base	LTR	Gypsy	0	34	-5.12928	0	96	-6.59991	0	34	-5.12928	0	34	-5.12928
bel-3_dper base	LTR	Pao	0	1150	-10.1687	721	2053	-1.94242	1125	332	-0.372784	285	654	-1.71665
bel-21_dta base	LTR	Pao	0	71	-6.16993	0	321	-8.33092	0	117	-6.88264	0	117	-6.88264
gypsy7_dya base	LTR	Gypsy	0	18961	-14.2108	0	6855	-12.7432	0	4084	-11.9961	0	12946	-13.6603
gypsy-3_del base	LTR	Gypsy	0	45	-5.52356	0	94	-6.56986	0	98	-6.62936	0	261	-8.03342
bel-2_deu base	LTR	Pao	0	3692	-11.8506	0	2763	-11.4325	0	1641	-10.6812	0	5163	-12.3343
transib1_dp base	DNA	CMC-Transib	0	169	-7.40939	0	166	-7.3837	0	166	-7.3837	0	61	-5.9542
gypsy-5_dgri base	LTR	Gypsy	0	0	0	0	282	-8.14466	0	90	-6.50779	0	141	-7.14975
gypsy4 base	LTR	Gypsy	0	244659	-17.9004	0	72916	-16.154	0	30424	-14.893	0	85946	-16.3912
gypsy-1_dbp base	LTR	Gypsy	0	0	0	0	56	-5.83289	0	123	-6.9542	0	41	-5.39232
gypsy-26_dp base	LTR	Gypsy	0	132	-7.05528	0	88	-6.47573	0	262	-8.03892	0	188	-7.56224
gypsy-8_dfi base	LTR	Gypsy	0	693	-9.43879	0	181	-7.50779	0	59	-5.90689	0	104	-6.71425
mudr-1_df base	DNA	MULE-NOF	0	303	-8.24793	0	172	-7.43463	0	305	-8.25739	0	522	-9.03067
bel1_dya base	LTR	Pao	0	232	-7.86419	0	302	-8.24317	0	294	-8.20457	0	115	-6.85798
hovi2 base	DNA	hAT-hobo	0	53	-5.75489	0	97	-6.61471	0	291	-8.18982	0	173	-7.44294
i-4_dan base	Non-LTR_retrotransposon	I	0	2134	-11.06	0	502	-8.97441	0	764	-9.57932	0	1484	-10.5362
cr1-1_drh base	Non-LTR_retrotransposon	CR1	0	121	-6.93074	0	168	-7.40088	0	75	-6.24793	0	213	-7.74147
helitron-n1_dbp base	RC	Helitron	0	518	-9.01959	0	521	-9.02791	0	550	-9.10591	0	209	-7.71425
gypsy-28_dya base	LTR	Gypsy	0	2774	-11.4383	3086	5544	-1.48332	3495	4595	-1.21061	1327	7162	-2.67651
353bp_sat base	Satellite	1pt688	0	495063	-18.9173	0	106326	-16.6981	0	36730	-15.1647	0	71524	-16.1262
i-5_dbi base	Non-LTR_retrotransposon	I	0	525	-9.03892	0	170	-7.41785	0	170	-7.41785	0	425	-8.73471
i-8_dbi base	Non-LTR_retrotransposon	I	0	0	0	0	50	-5.67243	0	50	-5.67243	0	126	-6.98868
i-2_dwi base	Non-LTR_retrotransposon	I	0	0	0	0	183	-7.52356	0	81	-6.35755	0	212	-7.73471
gypsy-25_dp base	LTR	Gypsy	0	102	-6.6865	0	33	-5.08746	0	77	-6.2854	0	86	-6.44294
i-2_dbi base	Non-LTR_retrotransposon	I	0	791	-9.62936	0	1126	-10.1383	0	805	-9.65464	0	412	-8.69
bel2_dpse base	LTR	Pao	0	0	0	0	212	-7.73471	0	212	-7.73471	0	87	-6.45943
gypsy3_dmoj base	LTR	Gypsy	0	0	0	0	4687	-12.1948	0	1886	-10.8819	0	1995	-10.9629
jockey-6_dan base	Non-LTR_retrotransposon	Jockey	0	496	-8.9571	0	1242	-10.2796	0	1287	-10.3309	0	525	-9.03892
gypsy-53_dwil base	LTR	Gypsy	408	237	-0.659433	59	138	-1.72247	212	46	-0.282099	59	79	-1.21205
bel-10_dbp base	LTR	Pao	0	2046	-10.9993	0	2087	-11.0279	0	1789	-10.8057	0	817	-9.67596
gypsy-18_dta base	LTR	Gypsy	0	1590	-10.6357	0	464	-8.86109	0	181	-7.50779	0	389	-8.60733
r1-3_dan base	Non-LTR_retrotransposon	R1	0	152	-7.25739	0	225	-7.82018	0	83	-6.39232	0	152	-7.25739
r1_der base	Non-LTR_retrotransposon	R1	0	3127	-11.611	0	277	-8.11894	0	584	-9.19229	0	715	-9.48382
gypsy-6_dper base	LTR	Gypsy	2282	3825	-1.41977	0	7489	-12.8708	0	3412	-11.7368	0	8561	-13.0637
gypsy-17_del base	LTR	Gypsy	0	0	0	0	0	0	38	53	-1.23816	258	0	0
gypsy15_dya base	LTR	Gypsy	0	23417	-14.5153	1254	10673	-3.24859	927	9075	-3.43016	3747	12541	-2.11971
jockey-3_dt base	Non-LTR_retrotransposon	Jockey	0	1426	-10.4788	0	629	-9.29921	0	722	-9.49785	0	1564	-10.6119
hoana4 base	DNA	hAT-hobo	0	0	0	0	75	-6.24793	0	73	-6.20945	0	174	-7.45121
inv2j_db base	DNA	P	0	560	-9.13186	0	784	-9.61655	0	296	-8.21432	0	484	-8.92184
gypsy-21_dy base	LTR	Gypsy	693	960	-1.25295	0	590	-9.20701	0	268	-8.07146	0	648	-9.34207
gypsy-25_del base	LTR	Gypsy	0	7399	-12.8533	0	2820	-11.462	0	2475	-11.2738	0	1152	-10.1712
i-3_dbi base	Non-LTR_retrotransposon	I	0	1051	-10.0389	0	2530	-11.3055	0	981	-9.93958	0	1336	-10.3848
jockey-7_dk base	Non-LTR_retrotransposon	Jockey	0	0	0	0	278	-8.12412	0	120	-6.91886	0	120	-6.91886
transibn1_dp base	DNA	CMC-Transib	0	891	-9.8009	0	532	-9.05799	0	1155	-10.1749	0	1283	-10.3264
gypsy6_dmoj base	LTR	Gypsy	0	1955	-10.9337	0	1055	-10.0444	0	413	-8.69349	0	787	-9.62205
gypsy-41_del base	LTR	Gypsy	0	406	-8.66888	0	239	-7.90689	0	145	-7.18982	0	378	-8.56605
gypsy-2_dan base	LTR	Gypsy	39	8688	-7.76951	0	2624	-11.3581	0	2302	-11.1693	0	5534	-12.4344
mudr-1_dt base	DNA	MULE-NOF	0	1347	-10.3966	0	150	-7.2384	0	148	-7.21917	0	338	-8.40514
uhu_dan base	DNA	TcMar-Tc1	0	62	-5.97728	0	112	-6.82018	0	49	-5.64386	0	49	-5.64386
gypsy-9_dbi base	LTR	Gypsy	0	33	-5.08746	0	252	-7.98299	0	152	-7.25739	0	390	-8.61102
helitron-n2_del base	RC	Helitron	63	8622	-7.08448	88	12489	-7.14288	148	8781	-5.90528	180	11988	-6.07108
gypsy-19_dbp base	LTR	Gypsy	0	0	0	0	37	-5.24793	0	34	-5.12928	0	80	-6.33985
copia2_dmoj base	LTR	Copia	0	0	0	0	122	-6.94251	0	48	-5.61471	0	71	-6.16993
bel-5_dan base	LTR	Pao	0	2637	-11.3652	0	565	-9.14466	0	242	-7.92481	0	271	-8.08746
dmr_dv base	Other	Other	0	699	-9.45121	0	2547	-11.3151	0	1037	-10.0196	0	1896	-10.8895
hat-1_del base	DNA	hAT-Ac	0	0	0	0	69	-6.12928	0	60	-5.93074	0	142	-7.15987
gypsy-20_dwil base	LTR	Gypsy	0	0	0	0	785	-9.61839	0	899	-9.81378	0	386	-8.59619
i-4_dbi base	Non-LTR_retrotransposon	I	0	74	-6.22882	0	233	-7.87036	0	290	-8.18488	0	556	-9.12153
polinton-1_dbi base	DNA	Maverick	0	205	-7.6865	0	578	-9.17742	0	1380	-10.4315	0	1092	-10.0941
copia-3_deu base	LTR	Copia	0	3292	-11.6852	0	7215	-12.817	0	3573	-11.8033	0	8250	-13.0104
helitron-2_drh base	RC	Helitron	0	6596	-12.6876	126	5854	-5.55749	263	5131	-4.35301	128	5046	-5.32612
gypsy-44_del base	LTR	Gypsy	0	149	-7.22882	0	166	-7.3837	0	74	-6.22882	0	80	-6.33985
bel-5_dvir base	LTR	Pao	0	548	-9.10066	0	304	-8.25267	0	642	-9.32867	0	296	-8.21432
bel-14_del base	LTR	Pao	0	1664	-10.7013	574	735	-1.18793	570	1194	-1.62811	2413	735	-0.383468
hat-1_dan base	DNA	hAT-Charlie	0	197	-7.62936	0	205	-7.6865	0	162	-7.34873	0	377	-8.56224
r1-1_dbi base	Non-LTR_retrotransposon	R1	480	0	0	0	58	-5.88264	0	137	-7.10852	0	79	-6.32193
gypsy-31_del base	LTR	Gypsy	0	27789	-14.7623	0	3689	-11.8494	0	7761	-12.9222	0	7792	-12.928
tart-1_dwi base	Non-LTR_retrotransposon	Jockey	0	34	-5.12928	0	60	-5.93074	0	34	-5.12928	0	80	-6.33985
i-3_deu base	Non-LTR_retrotransposon	I	0	2409	-11.2348	0	478	-8.90388	0	215	-7.75489	0	247	-7.9542
i-1_dan base	Non-LTR_retrotransposon	I	0	258	-8.01681	0	68	-6.10852	0	143	-7.16993	0	143	-7.16993
mariner-9_dan base	DNA	TcMar-Tc1	0	1417	-10.4696	0	760	-9.57175	0	410	-8.68299	0	337	-8.40088
mariner-3_drh base	DNA	TcMar-Mariner	0	39	-5.32193	0	39	-5.32193	0	39	-5.32193	0	82	-6.37504
rtex-1_dt base	Non-LTR_retrotransposon	RTE-X	0	171	-7.42626	0	653	-9.35315	0	619	-9.27612	0	307	-8.26679
gypsy-2_dse base	LTR	Gypsy	0	63700	-15.959	0	124820	-16.9295	0	56605	-15.7887	0	65919	-16.0084
bel-18_dwil base	LTR	Pao	0	65	-6.04439	0	147	-7.20945	0	98	-6.62936	0	63	-6
gypsy-35_del base	LTR	Gypsy	78	202	-1.83065	1036	196	-0.249757	1598	120	-0.1044	1271	1654	-1.20183
jockey-4_dbp base	Non-LTR_retrotransposon	Jockey	0	2545	-11.314	0	1099	-10.1033	0	1484	-10.5362	0	2485	-11.2796
gypsy-5_dta base	LTR	Gypsy	0	0	0	0	676	-9.40301	0	404	-8.66178	0	300	-8.23362
transib-7_dbi base	DNA	CMC-Transib	0	847	-9.72792	0	1134	-10.1485	0	1012	-9.98442	0	2152	-11.0721
transibn3_dp base	DNA	CMC-Transib	0	0	0	0	46	-5.55459	0	46	-5.55459	0	94	-6.56986
hat-3_dbp base	DNA	hAT-Ac	0	326	-8.35315	0	209	-7.71425	0	99	-6.64386	0	192	-7.59246
hat-2_dbp base	DNA	hAT-Ac	0	338	-8.40514	0	295	-8.20945	0	384	-8.58871	0	173	-7.44294
gypsy-6_drh base	LTR	Gypsy	0	12648	-13.6267	1275	1933	-1.3305	1587	3058	-1.54878	1546	6747	-2.42259
jockey-13_dan base	Non-LTR_retrotransposon	Jockey	164	132	-0.847997	94	48	-0.590016	105	130	-1.15472	0	0	0
transib4 base	DNA	CMC-Transib	0	17521	-14.0969	2809	8805	-2.04735	1332	10579	-3.15967	1476	9213	-2.85552
gypsy3_dya base	LTR	Gypsy	0	5086	-12.3126	0	1773	-10.7928	0	3021	-11.5613	0	3834	-11.905
gypsy-43_dwil base	LTR	Gypsy	0	774	-9.59805	0	296	-8.21432	0	304	-8.25267	0	591	-9.20945
gypsy-12_dwil base	LTR	Gypsy	0	80	-6.33985	0	158	-7.31288	0	158	-7.31288	0	80	-6.33985
jockey-9_dan base	Non-LTR_retrotransposon	Jockey	0	77	-6.2854	1539	3674	-1.75946	1849	1153	-0.698879	1405	1266	-0.926323
gypsy-21_dwil base	LTR	Gypsy	0	310	-8.28077	0	1013	-9.98584	0	490	-8.93958	0	887	-9.79442
gypsy-37_dwil base	LTR	Gypsy	0	311	-8.2854	0	39	-5.32193	0	76	-6.26679	0	78	-6.30378
jockey-6_dvi base	Non-LTR_retrotransposon	Jockey	0	3953	-11.9491	0	7587	-12.8895	0	3543	-11.7912	0	4756	-12.2158
hogri1 base	DNA	hAT-hobo	0	184	-7.53138	0	157	-7.30378	0	129	-7.02237	0	271	-8.08746
transib-6_dan base	DNA	CMC-Transib	1435	1394	-0.978746	0	222	-7.8009	0	321	-8.33092	0	475	-8.89482
jockey-6_deu base	Non-LTR_retrotransposon	Jockey	0	1273	-10.3151	0	885	-9.79116	0	1411	-10.4635	0	1851	-10.8549
gypsy4_dmoj base	LTR	Gypsy	0	796	-9.63844	0	577	-9.17493	0	516	-9.01402	0	288	-8.17493
copia-1_dfi base	LTR	Copia	1074	5461	-2.60407	223	5858	-4.76298	108	4753	-5.47915	109	6059	-5.80946
loa-1_del base	Non-LTR_retrotransposon	LOA	0	65	-6.04439	0	60	-5.93074	0	107	-6.75489	0	53	-5.75489
gypsy-40_dan base	LTR	Gypsy	0	4710	-12.2018	0	3882	-11.923	0	4393	-12.1013	0	7769	-12.9237
helitron-n1_dan base	RC	Helitron	0	253	-7.98868	0	793	-9.633	0	948	-9.89026	0	466	-8.86728
jockey-1_dbp base	Non-LTR_retrotransposon	Jockey	54	384	-2.99672	2805	553	-0.259517	1266	1699	-1.2271	1142	1329	-1.11285
mariner-16_drh base	DNA	TcMar-Tc1	0	129	-7.02237	0	411	-8.6865	0	203	-7.67243	0	346	-8.43879
r1_dps base	Non-LTR_retrotransposon	R1	0	742	-9.53722	0	561	-9.13443	0	1098	-10.102	0	611	-9.25739
marina base	DNA	TcMar-Mariner	0	650	-9.34651	0	1116	-10.1254	0	1821	-10.8313	0	893	-9.80413
bs3_dm base	Non-LTR_retrotransposon	Jockey	636	56223	-6.47998	0	17798	-14.1195	0	15861	-13.9533	0	31322	-14.9349
gypsy-27_dbp base	LTR	Gypsy	0	66	-6.06609	0	40	-5.35755	0	76	-6.26679	0	40	-5.35755
gypsy-19_dwil base	LTR	Gypsy	0	254	-7.99435	457	492	-1.05258	5053	169	-0.047453	2243	703	-0.393174
jockey-4b_dvi base	Non-LTR_retrotransposon	Jockey	0	5713	-12.4803	0	2708	-11.4035	0	2099	-11.0362	0	4219	-12.043
outcast-1_dbi base	Non-LTR_retrotransposon	Jockey	0	385	-8.59246	0	319	-8.32193	0	297	-8.21917	0	168	-7.40088
mariner-4_drh base	DNA	TcMar-Tc1	0	266	-8.0607	0	56	-5.83289	0	103	-6.70044	0	103	-6.70044
cr1-4_dbi base	Non-LTR_retrotransposon	CR1	0	0	0	0	107	-6.75489	0	196	-7.62205	0	196	-7.62205
bel-4_dpse base	LTR	Pao	0	0	0	0	76	-6.26679	0	76	-6.26679	0	139	-7.12928
dna2-1_dan base	DNA	DNA	0	115	-6.85798	0	69	-6.12928	0	134	-7.07682	0	115	-6.85798
gypsy19_dya base	LTR	Gypsy	160	199	-1.16094	118	2172	-4.26694	172	1872	-3.56326	242	2176	-3.31538
bel-2_dfi base	LTR	Pao	0	113	-6.83289	0	50	-5.67243	0	71	-6.16993	0	100	-6.65821
gypsy6_dya base	LTR	Gypsy	195	3831	-4.36078	918	1972	-1.65343	237	1238	-2.63266	480	1510	-2.04938
r1_dmo base	Non-LTR_retrotransposon	R1	0	666	-9.38154	0	685	-9.42206	0	519	-9.02237	0	1024	-10.0014
gypsy1_dmoj base	LTR	Gypsy	0	387	-8.59991	0	113	-6.83289	0	64	-6.02237	0	119	-6.90689
gypsy-10_del base	LTR	Gypsy	0	0	0	0	294	-8.20457	0	152	-7.25739	0	188	-7.56224
gypsy-3_drh base	LTR	Gypsy	0	26711	-14.7052	0	23137	-14.498	0	16566	-14.016	0	11837	-13.5311
i-2_del base	Non-LTR_retrotransposon	I	0	1881	-10.8781	0	2246	-11.1338	0	1601	-10.6457	0	3115	-11.6055
helitron-1_dana base	RC	Helitron	0	336	-8.3966	0	0	0	0	0	0	410	320	-0.830733
transib-1_dk base	DNA	CMC-Transib	0	226	-7.82655	0	455	-8.83289	0	872	-9.76984	0	560	-9.13186
r1-8_dwi base	Non-LTR_retrotransposon	R1	0	0	0	0	56	-5.83289	0	100	-6.65821	0	56	-5.83289
bel-20_dwil base	LTR	Pao	0	0	0	0	466	-8.86728	0	381	-8.57743	0	727	-9.50779
gypsy-21_del base	LTR	Gypsy	0	2247	-11.1344	0	1243	-10.2808	0	1882	-10.8788	0	2366	-11.2088
bel-17_dan base	LTR	Pao	0	77	-6.2854	0	136	-7.09803	0	136	-7.09803	0	77	-6.2854
gypsy-10_deu base	LTR	Gypsy	670	2189	-2.09163	0	2863	-11.4838	0	4461	-12.1235	0	5384	-12.3947
hat-n1_dk base	DNA	hAT-Ac	0	232	-7.86419	0	266	-8.0607	0	152	-7.25739	0	268	-8.07146
loa-1b_dper base	Non-LTR_retrotransposon	LOA	0	0	0	0	63	-6	0	63	-6	0	111	-6.80735
outcast-1_deu base	Non-LTR_retrotransposon	Jockey	0	31	-5	0	138	-7.11894	0	113	-6.83289	0	213	-7.74147
mariner-12_dan base	DNA	TcMar-Tc1	0	3613	-11.8194	445	1588	-2.1892	587	858	-1.29818	824	1583	-1.54537
hoyak1 base	DNA	hAT-hobo	0	76	-6.26679	0	141	-7.14975	0	90	-6.50779	0	76	-6.26679
gypsy1_dya base	LTR	Gypsy	0	3142	-11.6179	574	4125	-3.03103	1154	3907	-2.13181	658	3614	-2.6969
jockey-3_deu base	Non-LTR_retrotransposon	Jockey	0	389	-8.60733	0	580	-9.18239	0	1039	-10.0224	0	631	-9.30378
mariner-1_dro base	DNA	TcMar-Mariner	0	0	0	0	0	0	0	0	0	2629	1902	-0.785085
helitron-1_dk base	RC	Helitron	0	158	-7.31288	0	148	-7.21917	0	262	-8.03892	0	160	-7.33092
jockey-3_dan base	Non-LTR_retrotransposon	Jockey	0	59	-5.90689	0	59	-5.90689	0	101	-6.67243	0	59	-5.90689
mariner-8_df base	DNA	TcMar-Tc1	0	291	-8.18982	0	1550	-10.599	0	922	-9.85019	0	915	-9.8392
mariner-6_dbi base	DNA	TcMar-Tc1	0	307	-8.26679	0	970	-9.92333	0	1481	-10.5333	0	1738	-10.764
i-6_dy base	Non-LTR_retrotransposon	I	0	9332	-13.1881	0	7740	-12.9183	0	7952	-12.9573	0	13198	-13.6881
bel-6_drh base	LTR	Pao	1077	1611	-1.31871	62	43	-0.750641	723	0	0	0	0	0
hat-5_dbp base	DNA	hAT-Ac	0	344	-8.43045	0	167	-7.39232	0	167	-7.39232	0	99	-6.64386
bel3_dm base	LTR	Pao	384	1092	-1.93974	109	565	-2.61738	198	660	-2.10989	165	1123	-2.957
i-1_del base	Non-LTR_retrotransposon	I	0	391	-8.61471	0	1103	-10.1085	0	1149	-10.1674	0	681	-9.41363
r1-1_der base	Non-LTR_retrotransposon	R1	0	3470	-11.7611	0	2869	-11.4868	0	2444	-11.2556	0	4293	-12.0681
hoyak3 base	DNA	hAT-Pegasus	0	793	-9.633	0	443	-8.79442	0	722	-9.49785	0	743	-9.53916
i-2_dbp base	Non-LTR_retrotransposon	I	0	3501	-11.774	0	4314	-12.0751	0	4197	-12.0355	0	2584	-11.3359
bel-14_dp base	LTR	Pao	1460	15639	-3.54897	2153	16267	-3.09626	1165	11330	-3.42183	1217	17198	-3.91837
hat-2_drh base	DNA	hAT-hobo	0	182	-7.5157	0	184	-7.53138	0	324	-8.3443	0	228	-7.8392
bel-12_del base	LTR	Pao	0	5466	-12.4165	0	4256	-12.0556	0	2469	-11.2703	0	2814	-11.4589
bel-1_dwil base	LTR	Pao	0	1471	-10.5236	0	964	-9.91439	0	1199	-10.2288	0	1690	-10.7237
gypsy-14_dbi base	LTR	Gypsy	0	13770	-13.7493	0	2012	-10.9751	0	1307	-10.3531	0	1185	-10.2119
cr1-2_drh base	Non-LTR_retrotransposon	CR1	0	348	-8.44708	482	1307	-1.88986	361	1989	-2.69921	361	1449	-2.32272
gypsy7 base	LTR	Gypsy	0	90688	-16.4686	0	25901	-14.6608	0	16168	-13.9809	0	26546	-14.6963
helitron-1_dvir base	RC	Helitron	0	868	-9.76321	0	777	-9.60363	0	1207	-10.2384	0	1295	-10.3399
jockey-3_dya base	Non-LTR_retrotransposon	Jockey	0	433	-8.76155	0	163	-7.35755	0	163	-7.35755	0	101	-6.67243
hat-2_df base	DNA	hAT-hobo	0	320	-8.32643	0	134	-7.07682	0	83	-6.39232	0	83	-6.39232
gypsy-30_del base	LTR	Gypsy	0	0	0	0	59	-5.90689	0	46	-5.55459	0	80	-6.33985
bel-10_dta base	LTR	Pao	0	0	0	0	76	-6.26679	0	122	-6.94251	0	76	-6.26679
homo10 base	DNA	hAT-Ac	0	1002	-9.97011	0	908	-9.82814	0	1482	-10.5343	0	951	-9.89482
cr1-1_del base	Non-LTR_retrotransposon	CR1	0	2499	-11.2877	0	4943	-12.2715	0	2886	-11.4954	0	3666	-11.8404
gypsy2 base	LTR	Gypsy	0	189363	-17.5308	0	19084	-14.2202	0	30874	-14.9142	0	29960	-14.8708
transib-7_drh base	DNA	CMC-Transib	0	1686	-10.7202	0	2382	-11.2186	0	1427	-10.4798	0	2116	-11.0478
outcast-2_dan base	Non-LTR_retrotransposon	Jockey	0	2334	-11.1892	0	4126	-12.0109	0	3964	-11.9531	0	2545	-11.314
gypsy-11_dbp base	LTR	Gypsy	0	913	-9.83605	338	323	-0.965546	2538	384	-0.203189	414	258	-0.697495
outcast-1_del base	Non-LTR_retrotransposon	Jockey	0	3512	-11.7785	0	4799	-12.2288	0	3974	-11.9567	0	6727	-12.716
bel-2_dan base	LTR	Pao	115	2426	-4.45377	829	3117	-2.24957	658	4342	-2.92387	635	4114	-2.90083
hat-6_drh base	DNA	hAT-Ac	0	486	-8.92778	0	567	-9.14975	0	676	-9.40301	0	401	-8.65105
gypsy-1_drh base	LTR	Gypsy	0	4009	-11.9694	0	3906	-11.9318	0	2305	-11.1712	0	2916	-11.5103
gypsy23_dpse base	LTR	Gypsy	0	151	-7.24793	0	76	-6.26679	0	48	-5.61471	0	48	-5.61471
jockey-1_dk base	Non-LTR_retrotransposon	Jockey	404	20138	-5.66458	0	6020	-12.5558	0	9401	-13.1988	0	9517	-13.2164
r1-5b_dk base	Non-LTR_retrotransposon	R1	0	1625	-10.6671	0	1761	-10.783	0	1736	-10.7624	0	1116	-10.1254
nobel base	LTR	Pao	0	899	-9.81378	0	859	-9.74819	0	648	-9.34207	0	512	-9.00282
r1-3_dya base	Non-LTR_retrotransposon	R1	0	2426	-11.245	0	3669	-11.8416	0	2966	-11.5348	0	4962	-12.277
gypsy-8_dta base	LTR	Gypsy	102	1900	-4.28145	0	750	-9.55267	0	811	-9.66534	0	501	-8.97154
jockey-3_df base	Non-LTR_retrotransposon	Jockey	0	1470	-10.5226	0	1343	-10.3923	0	1943	-10.9248	0	2205	-11.1072
transib-4_dbi base	DNA	CMC-Transib	0	209	-7.71425	0	103	-6.70044	0	161	-7.33985	0	103	-6.70044
hoana5 base	DNA	hAT-Ac	0	4643	-12.1812	0	3424	-11.7419	0	5649	-12.464	0	4813	-12.233
gypsy-48_del base	LTR	Gypsy	0	0	0	0	10376	-13.3411	0	6270	-12.6145	0	7492	-12.8713
galileo_db base	DNA	P	0	1025	-10.0028	0	495	-8.9542	0	357	-8.48382	0	590	-9.20701
jockey-8_deu base	Non-LTR_retrotransposon	Jockey	473	1080	-1.71303	4248	2577	-0.683917	2613	2182	-0.875573	2361	3834	-1.39133
isfun1 base	RC	Helitron	0	459	-8.84549	0	860	-9.74987	0	765	-9.5812	0	529	-9.04985
rep-1_del base	Other	Other	0	1905	-10.8963	0	1092	-10.0941	0	709	-9.47168	0	1099	-10.1033
gypsy-26_dpse base	LTR	Gypsy	0	1094	-10.0967	0	726	-9.50581	0	1176	-10.2009	0	822	-9.68475
gypsy-31_dwil base	LTR	Gypsy	272	589	-1.65879	1181	178	-0.202377	936	827	-0.91273	2883	1378	-0.563459
gypsy-52_dwil base	LTR	Gypsy	0	1167	-10.1898	0	2297	-11.1662	0	3630	-11.8262	0	3353	-11.7117
nocat_dsech_final-b-p78.38-map3_novel_repeat base	Other	de_novo	0	162	-7.34873	0	1504	-10.5555	0	2102	-11.0382	0	2420	-11.2414
rte-1c_dan base	Non-LTR_retrotransposon	RTE-BovB	0	182	-7.5157	0	253	-7.98868	0	254	-7.99435	0	387	-8.59991
tc1_dm base	DNA	TcMar-Tc1	2034	45746	-4.55334	2230	4191	-1.52533	1440	5239	-2.21278	2086	5124	-1.78877
gypsy-3_dfi base	LTR	Gypsy	0	1025	-10.0028	0	1278	-10.3208	0	1434	-10.4868	0	905	-9.82337
jockey-2_del base	Non-LTR_retrotransposon	Jockey	0	1904	-10.8956	0	2693	-11.3955	0	2019	-10.9801	0	3244	-11.664
jockey-4_dan base	Non-LTR_retrotransposon	Jockey	104	159	-1.33015	0	258	-8.01681	0	370	-8.53528	0	405	-8.66534
jockey-n1_dvi base	Non-LTR_retrotransposon	Jockey	0	104	-6.71425	0	298	-8.224	0	443	-8.79442	0	294	-8.20457
gypsy-1_dg base	LTR	Gypsy	0	193	-7.59991	0	139	-7.12928	0	89	-6.49185	0	126	-6.98868
rte-1bn1_dan base	Non-LTR_retrotransposon	RTE-BovB	0	45	-5.52356	0	135	-7.08746	0	135	-7.08746	0	90	-6.50779
harbinger-1_drh base	DNA	PIF-Harbinger	0	75	-6.24793	0	111	-6.80735	0	74	-6.22882	0	74	-6.22882
r1-3_del base	Non-LTR_retrotransposon	R1	0	0	0	0	203	-7.67243	0	302	-8.24317	0	203	-7.67243
gypsy-13_deu base	LTR	Gypsy	0	1096	-10.0993	0	1275	-10.3174	0	1977	-10.9498	0	1431	-10.4838
gypsy-10_dbp base	LTR	Gypsy	549	323	-0.66655	3870	959	-0.319317	226	209	-0.941636	510	203	-0.482601
jockey-4_deu base	Non-LTR_retrotransposon	Jockey	0	54	-5.78136	0	67	-6.08746	0	67	-6.08746	0	99	-6.64386
gypsy14_dpse base	LTR	Gypsy	0	2663	-11.3794	0	1336	-10.3848	0	1910	-10.9001	0	1270	-10.3117
copia-9_dwil base	LTR	Copia	0	0	0	0	2749	-11.4252	0	1804	-10.8178	0	1978	-10.9506
gypsy-27_dp base	LTR	Gypsy	0	1151	-10.1699	0	968	-9.92035	0	679	-9.40939	0	651	-9.34873
gypsy-20_dta base	LTR	Gypsy	0	41	-5.39232	0	391	-8.61471	0	264	-8.04985	0	273	-8.09803
jockey-6_drh base	Non-LTR_retrotransposon	Jockey	0	3191	-11.6402	0	1129	-10.1421	0	1637	-10.6777	0	1121	-10.1319
loa-2_dta base	Non-LTR_retrotransposon	LOA	0	603	-9.2384	0	882	-9.78627	0	882	-9.78627	0	606	-9.24555
hat-1_dt base	DNA	hAT-Pegasus	0	59	-5.90689	0	327	-8.35755	0	238	-7.90087	0	216	-7.76155
gypsy-10_dta base	LTR	Gypsy	0	1209	-10.2408	0	5751	-12.4898	0	7910	-12.9496	0	8637	-13.0765
transib-8_dan base	DNA	CMC-Transib	192	3300	-4.17779	0	3427	-11.7432	0	3315	-11.6952	0	4872	-12.2506
i-1_deu base	Non-LTR_retrotransposon	I	0	1091	-10.0928	0	1116	-10.1254	0	1294	-10.3387	0	850	-9.73302
bel-3_dbp base	LTR	Pao	0	80	-6.33985	0	116	-6.87036	0	80	-6.33985	0	116	-6.87036
gypsy-60_dwil base	LTR	Gypsy	276	702	-1.82142	1828	40	-0.0312115	0	0	0	2002	911	-0.540838
polinton-1_dpe base	DNA	Maverick	0	170	-7.41785	0	176	-7.46761	0	122	-6.94251	0	122	-6.94251
i-4_deu base	Non-LTR_retrotransposon	I	0	1023	-10	0	2688	-11.3929	0	1845	-10.8502	0	2575	-11.3309
transib-6_dbp base	DNA	CMC-Transib	0	3652	-11.8349	0	219	-7.78136	0	313	-8.29462	0	219	-7.78136
g4_dm base	Non-LTR_retrotransposon	Jockey	2688	61165	-4.56964	0	22107	-14.4323	0	15062	-13.8787	0	20616	-14.3315
copia-3_dbp base	LTR	Copia	4129	14641	-2.18429	0	4340	-12.0838	0	6011	-12.5536	0	6290	-12.6191
mariner-17_dan base	DNA	TcMar-Tc1	0	5467	-12.4168	0	2196	-11.1013	0	3278	-11.679	0	2735	-11.4179
i-2_dya base	Non-LTR_retrotransposon	I	0	57	-5.85798	0	132	-7.05528	0	114	-6.84549	0	169	-7.40939
jockey-1_dgri base	Non-LTR_retrotransposon	Jockey	0	143	-7.16993	0	114	-6.84549	0	165	-7.37504	0	121	-6.93074
gypsy-29_dwil base	LTR	Gypsy	0	997	-9.9629	0	1274	-10.3163	0	868	-9.76321	0	1006	-9.97585
helitron1_dmoj base	RC	Helitron	0	651	-9.34873	0	648	-9.34207	0	482	-8.91588	0	686	-9.42417
helitron-7_drh base	RC	Helitron	0	262	-8.03892	0	224	-7.81378	0	269	-8.07682	0	327	-8.35755
jockey-6_dper base	Non-LTR_retrotransposon	Jockey	0	258	-8.01681	0	225	-7.82018	0	170	-7.41785	0	157	-7.30378
gypsy-18_dbp base	LTR	Gypsy	0	1682	-10.7168	1228	687	-0.640613	6498	1281	-0.259552	1823	1300	-0.776289
jockey-10_drh base	Non-LTR_retrotransposon	Jockey	0	525	-9.03892	0	1009	-9.98014	0	1462	-10.5147	0	1227	-10.2621
rep-1_dta base	Other	Other	0	4659	-12.1861	0	4445	-12.1183	0	4622	-12.1746	0	6205	-12.5994
helitron-n3_dt base	RC	Helitron	0	1217	-10.2503	0	1290	-10.3343	0	1835	-10.8424	0	1667	-10.7039
gypsy-11_deu base	LTR	Gypsy	0	0	0	0	886	-9.79279	0	621	-9.28077	0	712	-9.47776
gypsy-8_dbp base	LTR	Gypsy	0	0	0	597	217	-0.446655	0	0	0	0	0	0
hat-4_dk base	DNA	hAT-hobo	0	1727	-10.7549	0	348	-8.44708	0	340	-8.41363	0	254	-7.99435
bel-6_dbp base	LTR	Pao	0	1649	-10.6883	0	1646	-10.6856	0	2209	-11.1098	0	1629	-10.6707
gypsy-14_dan base	LTR	Gypsy	0	3644	-11.8317	0	3222	-11.6542	0	4091	-11.9986	0	2945	-11.5245
jockey-8_drh base	Non-LTR_retrotransposon	Jockey	0	493	-8.94837	0	138	-7.11894	0	104	-6.71425	0	141	-7.14975
frogger base	LTR	Copia	110	19448	-7.46113	0	5767	-12.4939	0	4546	-12.1507	0	4191	-12.0334
helitron-1_deu base	RC	Helitron	428	19566	-5.54252	473	19742	-5.41447	410	22600	-5.80704	550	22352	-5.37734
mariner-12_drh base	DNA	TcMar-Tc1	0	1292	-10.3365	0	621	-9.28077	0	511	-9	0	447	-8.80735
hat-4_dbp base	DNA	hAT-Ac	0	314	-8.29921	0	216	-7.76155	0	159	-7.32193	0	166	-7.3837
mar_dw base	DNA	hAT	0	128	-7.01123	0	67	-6.08746	0	75	-6.24793	0	93	-6.55459
dna8-1_del base	DNA	DNA	0	418	-8.71081	0	284	-8.15482	0	359	-8.49185	0	390	-8.61102
dna4-1_dk base	RC	Helitron	0	18072	-14.1415	0	39028	-15.2523	0	36484	-15.155	0	28681	-14.8079
r1a_dan base	Non-LTR_retrotransposon	R1	0	408	-8.67596	0	1051	-10.0389	0	795	-9.63662	0	797	-9.64024
jockey-9_dper base	Non-LTR_retrotransposon	Jockey	0	593	-9.21432	0	451	-8.82018	0	428	-8.74483	0	335	-8.39232
jockey-1_dt base	Non-LTR_retrotransposon	Jockey	0	810	-9.66356	0	1327	-10.375	0	969	-9.92184	0	1145	-10.1624
vege_dw base	DNA	hAT-Tip100	0	194	-7.60733	0	272	-8.09276	0	202	-7.66534	0	255	-8
gypsy-5_drh base	LTR	Gypsy	0	30	-4.9542	0	208	-7.70736	0	198	-7.63662	0	265	-8.05528
jockey-2_drh base	Non-LTR_retrotransposon	Jockey	12	187	-3.94342	0	103	-6.70044	0	135	-7.08746	0	103	-6.70044
gypsy-2_drh base	LTR	Gypsy	328	5917	-4.24677	0	80	-6.33985	0	61	-5.9542	0	61	-5.9542
bs4_dm base	Non-LTR_retrotransposon	Jockey	577	1239	-1.65242	2040	3110	-1.33558	2136	1889	-0.91376	2232	3052	-1.24292
hat-n1_del base	DNA	hAT-Ac	0	249	-7.96578	0	287	-8.16993	0	240	-7.91289	0	213	-7.74147
i-7_dbi base	Non-LTR_retrotransposon	I	0	3697	-11.8525	0	1764	-10.7855	0	1414	-10.4666	0	1333	-10.3815
hat-1_drh base	DNA	hAT-Ac	0	470	-8.87958	0	1128	-10.1408	0	1193	-10.2216	0	1491	-10.543
gypsy-22_dy base	LTR	Gypsy	139	4799	-5.14072	0	4547	-12.151	0	3458	-11.7561	0	4357	-12.0895
bel-1_drh base	LTR	Pao	0	13580	-13.7293	0	13448	-13.7152	0	10876	-13.409	0	14425	-13.8164
gypsy-4_dwil base	LTR	Gypsy	0	44	-5.49185	0	44	-5.49185	0	44	-5.49185	0	57	-5.85798
harbinger-1_dw base	DNA	PIF-Harbinger	0	427	-8.74147	0	419	-8.71425	0	491	-8.94251	0	561	-9.13443
mariner-1_df base	DNA	TcMar-Mariner	839	3869	-2.48696	0	1547	-10.5962	0	1618	-10.6609	0	2030	-10.988
helitron-2_dvir base	RC	Helitron	0	5135	-12.3264	0	6018	-12.5553	0	5990	-12.5486	0	7724	-12.9153
gypsy-57_del base	LTR	Gypsy	0	2246	-11.1338	0	3680	-11.8459	0	2918	-11.5113	0	2831	-11.4676
bel-7_dpe base	LTR	Pao	0	381	-8.57743	0	428	-8.74483	0	383	-8.58496	0	324	-8.3443
helitron-2n1_dvir base	RC	Helitron	57	3491	-5.93522	0	4232	-12.0475	0	3653	-11.8353	0	4827	-12.2372
356bp_sat base	Satellite	1pt688	0	118047	-16.849	0	15879	-13.9549	0	12054	-13.5573	0	14066	-13.78
jockey-2_deu base	Non-LTR_retrotransposon	Jockey	0	202	-7.66534	0	390	-8.61102	0	344	-8.43045	0	296	-8.21432
helitron-n2_dbi base	RC	Helitron	0	18597	-14.1829	0	16727	-14.03	0	19193	-14.2284	0	14608	-13.8346
transib-6_drh base	DNA	CMC-Transib	0	811	-9.66534	0	632	-9.30606	0	560	-9.13186	0	735	-9.52356
gypsy-4_drh base	LTR	Gypsy	0	860	-9.74987	170	45	-0.337035	387	0	0	0	0	0
hoana1 base	DNA	hAT-hobo	0	1056	-10.0458	0	535	-9.06609	0	583	-9.18982	0	697	-9.44708
rep-2_df base	Other	Other	0	1173	-10.1972	0	582	-9.18735	0	538	-9.07414	0	449	-8.81378
copia-1_dgri base	LTR	Copia	0	179	-7.49185	0	210	-7.7211	0	270	-8.08215	0	221	-7.79442
bel-9_dwil base	LTR	Pao	0	1675	-10.7108	0	591	-9.20945	0	576	-9.17243	0	465	-8.86419
polinton-1_dan base	DNA	Maverick	0	1095	-10.098	0	969	-9.92184	0	1206	-10.2372	0	956	-9.90238
gypsy-16_dbi base	LTR	Gypsy	103	3704	-5.19438	0	5795	-12.5008	0	7497	-12.8723	0	6812	-12.7341
transib-8_drh base	DNA	CMC-Transib	0	0	0	0	36	-5.20945	0	46	-5.55459	0	38	-5.2854
helitron-n1_dbi base	RC	Helitron	747	44742	-5.92637	188	50219	-8.05912	206	49827	-7.91713	226	47076	-7.7031
r1-6_dwi base	Non-LTR_retrotransposon	R1	0	107	-6.75489	0	61	-5.9542	0	49	-5.64386	0	61	-5.9542
transib-1_del base	DNA	CMC-Transib	0	0	0	832	129	-0.20772	600	168	-0.355619	0	0	0
helitron-n1_del base	RC	Helitron	123	10413	-6.40898	0	12936	-13.6592	0	10244	-13.3226	0	12363	-13.5939
mariner-17_dk base	DNA	TcMar-Tc1	3077	13167	-2.39993	0	3071	-11.585	0	3922	-11.9377	0	3445	-11.7507
dna3-1_df base	DNA	DNA	0	18168	-14.1492	0	16988	-14.0523	0	20852	-14.348	0	16824	-14.0383
jockey-4_del base	Non-LTR_retrotransposon	Jockey	0	1159	-10.1799	0	211	-7.72792	0	229	-7.84549	0	268	-8.07146
dmrpr base	Other	Other	0	1376	-10.4273	0	1460	-10.5127	0	1425	-10.4778	0	1171	-10.1948
gypsy-2_dta base	LTR	Gypsy	0	5555	-12.4398	0	1614	-10.6573	0	1602	-10.6466	0	1960	-10.9374
gypsy5_dya base	LTR	Gypsy	0	5905	-12.528	0	2484	-11.279	0	3084	-11.5911	0	2636	-11.3647
gypsy-42_dwil base	LTR	Gypsy	0	1061	-10.0526	275	58	-0.27518	871	0	0	1198	0	0
r1-2_dta base	Non-LTR_retrotransposon	R1	0	3257	-11.6698	0	2821	-11.4625	0	3287	-11.683	0	3488	-11.7686
s2_dm base	DNA	TcMar-Tc1	244	25783	-6.73114	0	1859	-10.8611	0	1729	-10.7566	0	1500	-10.5517
hopers2 base	DNA	hAT-hobo	0	690	-9.43254	0	776	-9.60177	0	657	-9.36194	0	636	-9.31515
rte-1_dan base	Non-LTR_retrotransposon	RTE-BovB	0	672	-9.39446	0	679	-9.40939	0	580	-9.18239	0	710	-9.47371
gypsy-1_dan base	LTR	Gypsy	0	10971	-13.4215	0	4189	-12.0327	0	4161	-12.0231	0	4998	-12.2874
homo6 base	DNA	hAT-Pegasus	0	12828	-13.6471	0	10520	-13.361	0	10894	-13.4114	0	8967	-13.1306
mariner-13_df base	DNA	TcMar-Tc1	0	271	-8.08746	0	358	-8.48784	0	298	-8.224	0	301	-8.2384
homo3 base	DNA	hAT-Ac	0	1099	-10.1033	0	1491	-10.543	0	1222	-10.2562	0	1374	-10.4252
gypsy-5_dan base	LTR	Gypsy	0	64	-6.02237	0	506	-8.98584	0	608	-9.2503	0	594	-9.21675
jockey-1_dper base	Non-LTR_retrotransposon	Jockey	0	304	-8.25267	0	187	-7.55459	0	222	-7.8009	0	187	-7.55459
gypsy4_dpse base	LTR	Gypsy	0	0	0	0	669	-9.38802	0	743	-9.53916	0	610	-9.25503
bel-4_dper base	LTR	Pao	0	2959	-11.5314	0	2436	-11.2509	0	2009	-10.973	0	2144	-11.0668
jockey-2_dvi base	Non-LTR_retrotransposon	Jockey	0	92	-6.53916	0	168	-7.40088	0	193	-7.59991	0	203	-7.67243
bel-5_dfi base	LTR	Pao	0	658	-9.36413	0	57	-5.85798	0	57	-5.85798	0	48	-5.61471
jockey-5_dvi base	Non-LTR_retrotransposon	Jockey	0	557	-9.12412	0	755	-9.56224	0	646	-9.33762	0	636	-9.31515
nocat_dsech_final-b-p110.14-map3_novel_repeat base	Other	de_novo	0	968	-9.92035	0	1493	-10.545	0	1410	-10.4625	0	1245	-10.2831
p-1_dbp base	DNA	P	0	5885	-12.5231	0	5396	-12.3979	0	4624	-12.1752	0	5456	-12.4139
hoana7 base	DNA	hAT-Ac	0	440	-8.78463	0	324	-8.3443	0	365	-8.5157	0	385	-8.59246
bel-14_dan base	LTR	Pao	0	64	-6.02237	0	45	-5.52356	0	42	-5.42626	0	50	-5.67243
cr1-10_dta base	Non-LTR_retrotransposon	CR1	0	473	-8.88874	0	1148	-10.1662	0	1323	-10.3707	0	1335	-10.3837
helena base	Non-LTR_retrotransposon	Jockey	566	1048	-1.51011	1739	186	-0.14652	2474	157	-0.088731	1309	323	-0.317958
polinton-1_dgr base	DNA	Maverick	0	757	-9.56605	0	824	-9.68825	0	892	-9.80252	0	972	-9.9263
copia-3_dan base	LTR	Copia	1755	1829	-1.02968	2652	132	-0.0700527	757	150	-0.260494	2059	66	-0.0454973
galileo_dm base	DNA	P	0	7582	-12.8886	0	4979	-12.2819	0	5457	-12.4142	0	4654	-12.1846
helitron-n2_dt base	RC	Helitron	0	12679	-13.6303	0	14860	-13.8592	0	13029	-13.6695	0	12964	-13.6623
copia-2_dgri base	LTR	Copia	0	0	0	0	474	-8.89178	0	542	-9.08481	0	542	-9.08481
jockey-9_dy base	Non-LTR_retrotransposon	Jockey	0	6442	-12.6535	0	3970	-11.9553	0	3495	-11.7715	0	3461	-11.7574
gypsy-13_drh base	LTR	Gypsy	0	11437	-13.4815	0	4901	-12.2592	0	5376	-12.3926	0	5698	-12.4765
fw2_dm base	Non-LTR_retrotransposon	Jockey	3889	26964	-2.98762	0	28292	-14.7882	0	28944	-14.821	0	32559	-14.9908
bel-8_del base	LTR	Pao	0	264	-8.04985	0	252	-7.98299	0	250	-7.97154	0	286	-8.16491
mariner-7_dya base	DNA	TcMar-Tc1	4638	2997	-0.719003	0	3861	-11.9151	0	3858	-11.914	0	3390	-11.7275
copia-4_dwil base	LTR	Copia	0	57	-5.85798	0	50	-5.67243	0	50	-5.67243	0	57	-5.85798
gypsy-38_dwil base	LTR	Gypsy	0	1672	-10.7082	0	1846	-10.851	0	1914	-10.9031	0	2128	-11.056
jockey-12_dbp base	Non-LTR_retrotransposon	Jockey	0	827	-9.69349	170	0	0	3661	165	-0.0635821	1095	168	-0.205749
hoana6 base	DNA	hAT-Ac	0	1121	-10.1319	0	1190	-10.218	0	1227	-10.2621	0	1366	-10.4168
gypsy-2_del base	LTR	Gypsy	0	824	-9.68825	0	910	-9.83131	0	826	-9.69174	0	791	-9.62936
gypsy-23_del base	LTR	Gypsy	0	28384	-14.7928	0	25712	-14.6502	0	22849	-14.4799	0	25881	-14.6597
helitron-2n_dw base	RC	Helitron	0	1623	-10.6653	0	1559	-10.6073	0	1358	-10.4083	0	1487	-10.5392
i-4_dbp base	Non-LTR_retrotransposon	I	0	7467	-12.8665	0	4912	-12.2624	0	5479	-12.42	0	5579	-12.446
bel-8_dwil base	LTR	Pao	0	0	0	0	67	-6.08746	0	59	-5.90689	0	66	-6.06609
copia-1_dwil base	LTR	Copia	184	4204	-4.5683	784	272	-0.429211	1682	547	-0.406009	1566	308	-0.258885
bel2_dya base	LTR	Pao	0	17134	-14.0647	1223	7352	-2.8087	810	5421	-2.94192	1721	10008	-2.76805
jockey-3_dper base	Non-LTR_retrotransposon	Jockey	0	2393	-11.2252	0	1983	-10.9542	0	2207	-11.1085	0	2211	-11.1111
transib4_dp base	DNA	CMC-Transib	0	2227	-11.1215	0	1405	-10.4574	0	1521	-10.5718	0	1350	-10.3998
zator-1_df base	DNA	Zator	0	84	-6.40939	0	101	-6.67243	0	91	-6.52356	0	91	-6.52356
bel-1_dgri base	LTR	Pao	0	96	-6.59991	0	102	-6.6865	0	102	-6.6865	0	92	-6.53916
tabor_da base	LTR	Gypsy	1409	369	-0.335371	1947	1309	-0.74155	2537	2053	-0.855116	2337	2049	-0.90796
helitron-1_dt base	RC	Helitron	0	8786	-13.1012	0	10507	-13.3592	0	11127	-13.4419	0	9898	-13.2731
mariner-1_dpe base	DNA	TcMar-Mariner	0	532	-9.05799	0	257	-8.01123	0	284	-8.15482	0	257	-8.01123
helitronn-1_dpe base	RC	Helitron	0	2376	-11.2149	0	3020	-11.5608	0	2918	-11.5113	0	2705	-11.4019
transib-2_dbi base	DNA	CMC-Transib	11	99	-3.20945	0	1480	-10.5324	0	1643	-10.683	0	1565	-10.6129
cr1-9_dta base	Non-LTR_retrotransposon	CR1	0	1142	-10.1586	0	1116	-10.1254	0	1025	-10.0028	0	1127	-10.1396
mariner-4_dy base	DNA	TcMar-Tc1	0	1660	-10.6978	0	1782	-10.8001	0	1644	-10.6839	0	1625	-10.6671
nocat_dsim_final-b-p139.100-map3_novel_repeat base	Other	de_novo	0	348	-8.44708	0	1120	-10.1306	0	1227	-10.2621	0	1203	-10.2336
transib-3_df base	DNA	CMC-Transib	0	1892	-10.8865	0	12209	-13.5758	0	13177	-13.6858	0	13313	-13.7007
i-4_dk base	Non-LTR_retrotransposon	I	0	2170	-11.0841	0	1387	-10.4388	0	1494	-10.5459	0	1506	-10.5575
bel-4_dbi base	LTR	Pao	0	2168	-11.0828	0	1941	-10.9233	0	1781	-10.7993	0	1819	-10.8297
jockey-2_dper base	Non-LTR_retrotransposon	Jockey	0	0	0	0	205	-7.6865	0	190	-7.57743	0	203	-7.67243
hopseu2 base	DNA	hAT-Pegasus	0	983	-9.94251	0	1434	-10.4868	0	1331	-10.3794	0	1350	-10.3998
helitron-1n_df base	RC	Helitron	0	2673	-11.3848	0	3690	-11.8498	0	3423	-11.7415	0	3623	-11.8234
het-a3_dvi base	Non-LTR_retrotransposon	Jockey	0	13904	-13.7633	0	10652	-13.379	0	11473	-13.4861	0	11206	-13.4521
rep-2_dta base	Other	Other	0	17119	-14.0634	0	19240	-14.2319	0	18267	-14.157	0	17935	-14.1306
bel-15_del base	LTR	Pao	0	5073	-12.3089	0	11625	-13.5051	0	11424	-13.4799	0	12234	-13.5787
mariner-3_dk base	DNA	TcMar-Tc1	0	327	-8.35755	0	328	-8.36194	0	309	-8.27612	0	328	-8.36194
helitron-1n1_dvir base	RC	Helitron	44	1874	-5.41429	0	2889	-11.4969	0	2825	-11.4645	0	2703	-11.4009
jockey-6_dk base	Non-LTR_retrotransposon	Jockey	0	25849	-14.6579	0	27850	-14.7654	0	26761	-14.7079	0	26041	-14.6686
jockey-5_del base	Non-LTR_retrotransposon	Jockey	0	0	0	0	1221	-10.255	0	1294	-10.3387	0	1221	-10.255
gypsy-1_dgri base	LTR	Gypsy	0	0	0	3466	204	-0.0824853	3366	0	0	169	0	0
tart_dv base	Non-LTR_retrotransposon	Jockey	180	102330	-9.14557	0	94548	-16.5288	0	100209	-16.6127	0	95858	-16.5486
jockey-2_dgri base	Non-LTR_retrotransposon	Jockey	0	4867	-12.2491	0	4912	-12.2624	0	5053	-12.3032	0	5214	-12.3485
loa-3_dper base	Non-LTR_retrotransposon	LOA	0	479	-8.90689	0	503	-8.97728	0	503	-8.97728	0	479	-8.90689
bel-2_dbi base	LTR	Pao	0	827	-9.69349	0	651	-9.34873	0	645	-9.33539	0	679	-9.40939
homo9 base	DNA	hAT-Ac	0	275	-8.10852	0	551	-9.10852	0	576	-9.17243	0	566	-9.1472
bel-21_dwil base	LTR	Pao	249	5425	-4.50462	0	2615	-11.3531	0	2517	-11.2981	0	2520	-11.2998
bel-4_deu base	LTR	Pao	0	2624	-11.3581	0	1584	-10.6303	0	1588	-10.6339	0	1645	-10.6847
gypsy-12_dta base	LTR	Gypsy	760	0	0	937	33	-0.0498834	1131	86	-0.10564	752	32	-0.0600428
minos base	DNA	TcMar-Tc1	0	5804	-12.5031	0	4082	-11.9954	0	3942	-11.9451	0	3978	-11.9582
bel-7_dmoj base	LTR	Pao	0	51	-5.70044	0	67	-6.08746	0	69	-6.12928	0	67	-6.08746
gypsy-2_dvir base	LTR	Gypsy	0	118	-6.89482	1509	48	-0.0451467	810	48	-0.0829562	2732	100	-0.0518451
cr1-1_dper base	Non-LTR_retrotransposon	CR1	0	53	-5.75489	0	66	-6.06609	0	67	-6.08746	0	67	-6.08746
gypsy-27_del base	LTR	Gypsy	0	0	0	0	64	-6.02237	0	64	-6.02237	0	64	-6.02237
gypsy-44_dwil base	LTR	Gypsy	0	136	-7.09803	0	136	-7.09803	0	136	-7.09803	0	136	-7.09803
gypsy9_dpse base	LTR	Gypsy	0	54	-5.78136	0	54	-5.78136	0	54	-5.78136	0	54	-5.78136
harbinger-2b_drh base	DNA	PIF-Harbinger	0	0	0	0	40	-5.35755	0	40	-5.35755	0	40	-5.35755
helitron-n2_dbp base	RC	Helitron	0	138	-7.11894	0	42	-5.42626	0	42	-5.42626	0	42	-5.42626
jockey-2_dbi base	Non-LTR_retrotransposon	Jockey	0	0	0	0	93	-6.55459	0	93	-6.55459	0	93	-6.55459
r1-3_dk base	Non-LTR_retrotransposon	R1	0	0	0	0	46	-5.55459	0	46	-5.55459	0	46	-5.55459
at_rich base	Low_complexity	Low_complexity	0	0	0	0	0	0	0	0	0	0	0	0
bel-1_dere base	LTR	Pao	0	45	-5.52356	0	0	0	0	0	0	0	0	0
bel-21_dan base	LTR	Pao	0	252	-7.98299	0	68	-6.10852	0	68	-6.10852	0	68	-6.10852
bel-2_dbp base	LTR	Pao	0	928	-9.85953	0	0	0	0	0	0	0	0	0
bel-2_drh base	LTR	Pao	0	276	-8.11374	0	0	0	0	0	0	0	0	0
bel-3_dta base	LTR	Pao	0	0	0	0	0	0	0	0	0	0	0	0
bel-5_dbp base	LTR	Pao	0	68	-6.10852	0	0	0	0	0	0	4258	0	0
bel-5_dmoj base	LTR	Pao	0	35	-5.16993	0	35	-5.16993	0	35	-5.16993	0	35	-5.16993
bel-5_dper base	LTR	Pao	0	35	-5.16993	0	0	0	0	0	0	0	0	0
bel-7_dper base	LTR	Pao	0	39	-5.32193	0	0	0	0	0	0	0	0	0
bel-7_dwil base	LTR	Pao	0	49	-5.64386	0	50	-5.67243	0	50	-5.67243	0	50	-5.67243
bel3_dpse base	LTR	Pao	0	772	-9.59432	0	62	-5.97728	0	62	-5.97728	0	62	-5.97728
copia-2_deu base	LTR	Copia	0	106	-6.74147	0	0	0	0	0	0	0	0	0
copia-2_dta base	LTR	Copia	0	951	-9.89482	0	0	0	0	0	0	166	0	0
copia-3_dmoj base	LTR	Copia	0	838	-9.71253	0	0	0	0	0	0	0	0	0
cr1-1_dbi base	Non-LTR_retrotransposon	CR1	0	69	-6.12928	0	0	0	0	0	0	0	0	0
cr1-1_dwil base	Non-LTR_retrotransposon	CR1	0	116	-6.87036	0	0	0	0	0	0	0	0	0
cr1-2_del base	Non-LTR_retrotransposon	CR1	0	55	-5.80735	0	55	-5.80735	0	55	-5.80735	0	55	-5.80735
cr1-2_deu base	Non-LTR_retrotransposon	CR1	0	62	-5.97728	0	0	0	0	0	0	0	0	0
cr1-2_dper base	Non-LTR_retrotransposon	CR1	0	64	-6.02237	0	0	0	0	0	0	0	0	0
cr1-2_dt base	Non-LTR_retrotransposon	CR1	0	50	-5.67243	0	50	-5.67243	0	50	-5.67243	0	50	-5.67243
cr1-3_del base	Non-LTR_retrotransposon	CR1	0	50	-5.67243	0	0	0	0	0	0	0	0	0
cr1-4_del base	Non-LTR_retrotransposon	CR1	0	35	-5.16993	0	0	0	0	0	0	0	0	0
cr1-5_drh base	Non-LTR_retrotransposon	CR1	0	100	-6.65821	0	0	0	0	0	0	0	0	0
cr1-5_dt base	Non-LTR_retrotransposon	CR1	0	51	-5.70044	0	0	0	0	0	0	0	0	0
daraw1cons base	DNA	TcMar-Mariner	0	0	0	0	0	0	0	0	0	0	0	0
dbuski1cons base	DNA	TcMar-Mariner	0	0	0	0	0	0	0	0	0	0	0	0
dcardi9 base	DNA	TcMar-Mariner	0	0	0	0	0	0	0	0	0	0	0	0
dmacul5 base	DNA	TcMar-Mariner	0	0	0	0	0	0	0	0	0	0	0	0
dmau_rdna_18s_rdna base	rDNA	rDNA	0	0	0	0	0	0	0	0	0	0	0	0
dmau_rdna_28s_rdna base	rDNA	rDNA	0	0	0	0	0	0	0	0	0	0	0	0
dmau_rdna_5_8s_rdna base	rDNA	rDNA	0	0	0	0	0	0	0	0	0	0	0	0
dmedpu1cons base	DNA	TcMar-Mariner	0	0	0	0	0	0	0	0	0	0	0	0
dmedpu27 base	DNA	TcMar-Mariner	0	0	0	0	0	0	0	0	0	0	0	0
dmedtr1cons base	DNA	TcMar-Mariner	0	0	0	0	0	0	0	0	0	0	0	0
dmel_rdna_5_8s_rdna base	rDNA	rDNA	0	0	0	0	0	0	0	0	0	0	0	0
dna-1_dbp base	DNA	DNA	0	0	0	0	0	0	0	0	0	0	0	0
dna-1_deu base	DNA	DNA	0	0	0	0	0	0	0	0	0	0	0	0
dna-1_dpe base	DNA	DNA	0	0	0	0	0	0	0	0	0	0	0	0
dna-ta-1_df base	DNA	TcMar	0	0	0	0	0	0	0	0	0	0	0	0
dna-ta-1_dta base	DNA	DNA	0	0	0	0	0	0	0	0	0	0	0	0
dna3-2_dta base	DNA	DNA	0	0	0	0	0	0	0	0	0	0	0	0
dna7-1_del base	DNA	P	0	0	0	0	0	0	0	0	0	0	0	0
dneoca1 base	DNA	TcMar-Mariner	0	0	0	0	0	0	0	0	0	0	0	0
dneoca19 base	DNA	TcMar-Mariner	0	0	0	0	0	0	0	0	0	0	0	0
dneoca1cons base	DNA	TcMar-Mariner	0	0	0	0	0	0	0	0	0	0	0	0
dorna1cons base	DNA	TcMar-Mariner	0	0	0	0	0	0	0	0	0	0	0	0
dpalli7 base	DNA	TcMar-Mariner	0	0	0	0	0	0	0	0	0	0	0	0
dparag19 base	DNA	TcMar-Mariner	0	0	0	0	0	0	0	0	0	0	0	0
dparag30 base	DNA	TcMar-Mariner	0	0	0	0	0	0	0	0	0	0	0	0
dparam1cons base	DNA	TcMar-Mariner	0	0	0	0	0	0	0	0	0	0	0	0
dparam2cons base	DNA	TcMar-Mariner	0	0	0	0	0	0	0	0	0	0	0	0
dpauli6 base	DNA	TcMar-Mariner	0	0	0	0	0	0	0	0	0	0	0	0
dsech_rdna_18s_rdna base	rDNA	rDNA	0	0	0	0	0	0	0	0	0	0	0	0
dsech_rdna_5_8s_rdna base	rDNA	rDNA	0	0	0	0	0	0	0	0	0	0	0	0
dtripu1cons base	DNA	TcMar-Mariner	0	0	0	0	0	0	0	0	0	0	0	0
galileo_dw base	DNA	P	0	84	-6.40939	0	0	0	0	0	0	0	0	0
gc_rich base	Low_complexity	Low_complexity	0	0	0	0	0	0	0	0	0	0	0	0
gypsy-12_deu base	LTR	Gypsy	0	63	-6	0	0	0	0	0	0	0	0	0
gypsy-14_dfi base	LTR	Gypsy	0	860	-9.74987	0	0	0	0	0	0	0	0	0
gypsy-14b_dwil base	LTR	Gypsy	0	0	0	0	0	0	0	0	0	86	0	0
gypsy-15_dta base	LTR	Gypsy	0	0	0	0	36	-5.20945	0	36	-5.20945	0	36	-5.20945
gypsy-18_dwil base	LTR	Gypsy	0	98	-6.62936	0	0	0	0	0	0	0	0	0
gypsy-1_del base	LTR	Gypsy	0	47	-5.58496	0	47	-5.58496	0	47	-5.58496	0	47	-5.58496
gypsy-1_dwil base	LTR	Gypsy	0	62	-5.97728	0	62	-5.97728	0	62	-5.97728	0	62	-5.97728
gypsy-21_dan base	LTR	Gypsy	0	861	-9.75154	0	65	-6.04439	0	65	-6.04439	0	65	-6.04439
gypsy-21_dbp base	LTR	Gypsy	0	109	-6.78136	0	265	-8.05528	0	265	-8.05528	0	265	-8.05528
gypsy-23_dan base	LTR	Gypsy	0	44	-5.49185	0	0	0	98	0	0	0	0	0
gypsy-23_dbp base	LTR	Gypsy	0	132	-7.05528	0	33	-5.08746	0	33	-5.08746	0	33	-5.08746
gypsy-25_dya base	LTR	Gypsy	4595	1939	-0.507808	0	0	0	0	0	0	0	0	0
gypsy-26_dan base	LTR	Gypsy	0	92	-6.53916	0	92	-6.53916	0	92	-6.53916	0	92	-6.53916
gypsy-27_dwil base	LTR	Gypsy	0	140	-7.13955	0	0	0	0	0	0	0	0	0
gypsy-28_dwil base	LTR	Gypsy	0	0	0	0	0	0	0	0	0	114	0	0
gypsy-2_dbi base	LTR	Gypsy	0	278	-8.12412	0	0	0	0	0	0	0	0	0
gypsy-34_dan base	LTR	Gypsy	0	0	0	80	0	0	0	0	0	0	0	0
gypsy-36_dwil base	LTR	Gypsy	0	67	-6.08746	0	67	-6.08746	0	67	-6.08746	0	67	-6.08746
gypsy-48_dwil base	LTR	Gypsy	0	0	0	0	0	0	0	0	0	0	0	0
gypsy-49_dwil base	LTR	Gypsy	33	0	0	0	0	0	0	0	0	55	0	0
gypsy-4_dgri base	LTR	Gypsy	0	164	-7.36632	0	0	0	0	0	0	0	0	0
gypsy-4_dki base	LTR	Gypsy	0	63	-6	0	0	0	0	0	0	0	0	0
gypsy-56_dwil base	LTR	Gypsy	0	38	-5.2854	0	0	0	0	0	0	0	0	0
gypsy-59_dwil base	LTR	Gypsy	0	112	-6.82018	0	0	0	0	0	0	0	0	0
gypsy-5_dbi base	LTR	Gypsy	0	0	0	395	0	0	0	0	0	429	0	0
gypsy-6_dwil base	LTR	Gypsy	0	130	-7.03342	0	65	-6.04439	0	65	-6.04439	0	65	-6.04439
gypsy-8_dmoj base	LTR	Gypsy	0	34	-5.12928	0	0	0	0	0	0	0	0	0
gypsy2_dya base	LTR	Gypsy	0	0	0	0	0	0	0	0	0	60	0	0
gypsy7_dmoj base	LTR	Gypsy	0	67	-6.08746	0	0	0	0	0	0	0	0	0
harbinger-1_df base	DNA	PIF-Harbinger	0	0	0	0	0	0	0	0	0	0	0	0
harbinger-1n1_dk base	DNA	PIF-Harbinger	0	0	0	0	0	0	0	0	0	0	0	0
harbinger-1n1_drh base	DNA	PIF-Harbinger	0	61	-5.9542	0	0	0	0	0	0	0	0	0
harbinger-2_drh base	DNA	PIF-Harbinger	0	0	0	0	0	0	0	0	0	0	0	0
harbinger-n1_dpe base	DNA	PIF-Harbinger	0	41	-5.39232	0	73	-6.20945	0	73	-6.20945	0	73	-6.20945
hat-1_dbp base	DNA	hAT-Blackjack	0	0	0	0	0	0	0	0	0	0	0	0
hat-1_dk base	DNA	hAT-Ac	0	0	0	0	0	0	0	0	0	0	0	0
hat-1n_dw base	DNA	hAT-hobo	0	0	0	0	0	0	0	0	0	0	0	0
hat-2_dt base	DNA	hAT-hobo	0	0	0	0	0	0	0	0	0	0	0	0
hat-2n1_df base	DNA	hAT-hobo	0	0	0	0	0	0	0	0	0	0	0	0
hat-3_df base	DNA	hAT-Ac	0	0	0	0	0	0	0	0	0	0	0	0
hat-5_dk base	DNA	hAT-hobo	0	111	-6.80735	0	0	0	0	0	0	0	0	0
hat-5_drh base	DNA	hAT-Ac	0	0	0	0	0	0	0	0	0	0	0	0
hat-6_dk base	DNA	hAT-hobo	0	0	0	0	0	0	0	0	0	0	0	0
hat-8_dbp base	DNA	hAT-hobo	0	69	-6.12928	0	0	0	0	0	0	0	0	0
hat-9_dbp base	DNA	hAT-Pegasus	0	0	0	0	0	0	0	0	0	0	0	0
helitron-3_drh base	RC	Helitron	0	0	0	0	0	0	0	0	0	0	0	0
helitron-4_drh base	RC	Helitron	0	0	0	0	0	0	0	0	0	0	0	0
helitron-6_drh base	RC	Helitron	0	0	0	0	0	0	0	0	0	0	0	0
helitron-8_drh base	RC	Helitron	0	0	0	0	0	0	0	0	0	91	0	0
helitron-9_drh base	RC	Helitron	0	0	0	0	0	0	0	0	0	0	0	0
helitron1_dm base	RC	Helitron	0	564	-9.14211	0	0	0	0	0	0	0	0	0
het-a2_dvi base	Non-LTR_retrotransposon	Jockey	0	0	0	0	112	-6.82018	0	112	-6.82018	0	112	-6.82018
hoana8 base	DNA	hAT-hobo	0	0	0	0	0	0	0	0	0	0	0	0
hopers3 base	DNA	hAT-Pegasus	0	0	0	0	0	0	0	0	0	0	0	0
hovi1 base	DNA	hAT-hobo	0	0	0	0	56	-5.83289	0	56	-5.83289	0	56	-5.83289
howilli4 base	DNA	hAT-hobo	0	0	0	0	0	0	0	0	0	0	0	0
howilli5 base	DNA	hAT-hobo	0	0	0	0	0	0	0	0	0	0	0	0
i-1_dwi base	Non-LTR_retrotransposon	I	0	56	-5.83289	0	0	0	0	0	0	0	0	0
i-2_dan base	Non-LTR_retrotransposon	I	0	39	-5.32193	0	0	0	0	0	0	0	0	0
i-2_deu base	Non-LTR_retrotransposon	I	0	164	-7.36632	0	0	0	0	0	0	0	0	0
i-5_dbp base	Non-LTR_retrotransposon	I	0	0	0	0	0	0	0	0	0	0	0	0
jockey-13_dbp base	Non-LTR_retrotransposon	Jockey	0	50	-5.67243	0	0	0	0	0	0	0	0	0
jockey-6_del base	Non-LTR_retrotransposon	Jockey	0	0	0	0	0	0	635	0	0	0	0	0
jockey-7_dya base	Non-LTR_retrotransposon	Jockey	0	1039	-10.0224	565	0	0	0	0	0	0	0	0
kiri-1_dk base	Non-LTR_retrotransposon	L2	0	36	-5.20945	0	0	0	0	0	0	0	0	0
kiri-3_dta base	Non-LTR_retrotransposon	L2	0	0	0	52	0	0	0	0	0	0	0	0
kolobok-n1_df base	DNA	Kolobok-Hydra	0	0	0	0	0	0	0	0	0	0	0	0
l-rsp_sat base	Satellite	Rsp	0	51638	-15.6562	0	0	0	0	0	0	0	0	0
loa-1_dps base	Non-LTR_retrotransposon	LOA	0	45	-5.52356	0	45	-5.52356	0	45	-5.52356	0	45	-5.52356
loa-1_dt base	Non-LTR_retrotransposon	LOA	0	59	-5.90689	0	0	0	0	0	0	0	0	0
loa-2_del base	Non-LTR_retrotransposon	LOA	0	39	-5.32193	0	0	0	0	0	0	0	0	0
mariner-10_dan base	DNA	TcMar-Tc1	0	54	-5.78136	0	0	0	0	0	0	0	0	0
mariner-10_dbp base	DNA	TcMar-Tc1	0	0	0	0	0	0	0	0	0	0	0	0
mariner-10_df base	DNA	TcMar-Tc1	0	0	0	0	0	0	0	0	0	0	0	0
mariner-10_dk base	DNA	TcMar-Tc1	0	0	0	0	0	0	0	0	0	0	0	0
mariner-11_dan base	DNA	TcMar-Tc1	0	498	-8.9629	0	92	-6.53916	0	92	-6.53916	0	92	-6.53916
mariner-11_dk base	DNA	TcMar-Tc1	0	0	0	0	0	0	0	0	0	0	0	0
mariner-12_dbp base	DNA	TcMar-Tc1	0	0	0	0	0	0	0	0	0	0	0	0
mariner-12_df base	DNA	TcMar-Tc1	0	0	0	0	0	0	0	0	0	0	0	0
mariner-12_dk base	DNA	TcMar-Tc1	0	0	0	0	0	0	0	0	0	0	0	0
mariner-13_dan base	DNA	TcMar-Tc1	0	0	0	0	0	0	0	0	0	0	0	0
mariner-13_dbp base	DNA	TcMar-Mariner	0	44	-5.49185	0	0	0	0	0	0	0	0	0
mariner-13_drh base	DNA	TcMar-Tc1	0	0	0	0	0	0	0	0	0	0	0	0
mariner-14_dan base	DNA	TcMar-Tc1	0	0	0	0	36	-5.20945	0	36	-5.20945	0	36	-5.20945
mariner-14_dbp base	DNA	TcMar-Mariner	0	0	0	0	0	0	0	0	0	0	0	0
mariner-14_df base	DNA	TcMar-Tc1	0	0	0	0	0	0	0	0	0	0	0	0
mariner-14_drh base	DNA	TcMar-Tc1	0	0	0	0	0	0	0	0	0	0	0	0
mariner-15_dan base	DNA	TcMar-Tc1	0	0	0	0	0	0	0	0	0	0	0	0
mariner-15_drh base	DNA	TcMar-Tc1	0	0	0	0	0	0	0	0	0	0	0	0
mariner-16_dan base	DNA	TcMar-Tc1	0	0	0	0	0	0	0	0	0	0	0	0
mariner-16_df base	DNA	TcMar-Tc1	0	0	0	0	0	0	0	0	0	0	0	0
mariner-17_df base	DNA	TcMar-Tc1	0	0	0	0	0	0	0	0	0	0	0	0
mariner-17_drh base	DNA	TcMar-Tc1	0	0	0	0	0	0	0	0	0	0	0	0
mariner-18_dan base	DNA	TcMar-Tc1	0	0	0	0	0	0	0	0	0	0	0	0
mariner-18_dk base	DNA	TcMar-Tc1	0	0	0	0	0	0	0	0	0	0	0	0
mariner-18_drh base	DNA	TcMar-Tc1	0	0	0	0	0	0	0	0	0	0	0	0
mariner-19_df base	DNA	TcMar-Tc1	0	312	-8.29002	0	0	0	0	0	0	0	0	0
mariner-19_dk base	DNA	TcMar-Tc1	0	0	0	0	0	0	0	0	0	0	0	0
mariner-19_drh base	DNA	TcMar-Tc1	0	0	0	0	0	0	0	0	0	0	0	0
mariner-1_dan base	DNA	TcMar-Tc1	0	0	0	0	0	0	0	0	0	0	0	0
mariner-1_dar base	DNA	TcMar-Mariner	0	0	0	0	0	0	0	0	0	0	0	0
mariner-1_dbp base	DNA	TcMar-Tc1	0	50	-5.67243	0	0	0	0	0	0	0	0	0
mariner-1_del base	DNA	TcMar-Mariner	0	0	0	0	0	0	0	0	0	0	0	0
mariner-1_der base	DNA	TcMar-Mariner	0	0	0	0	0	0	0	0	0	0	0	0
mariner-1_dk base	DNA	TcMar-Tc1	0	0	0	0	0	0	0	0	0	0	0	0
mariner-1_dmac base	DNA	TcMar-Mariner	0	0	0	0	0	0	0	0	0	0	0	0
mariner-1_dt base	DNA	TcMar-Tc1	0	0	0	0	0	0	0	0	0	0	0	0
mariner-1_dw base	DNA	TcMar-Tc1	0	0	0	0	0	0	0	0	0	0	0	0
mariner-20_df base	DNA	TcMar-Tc1	0	0	0	0	0	0	0	0	0	0	0	0
mariner-20_drh base	DNA	TcMar-Tc1	0	0	0	0	0	0	0	0	0	0	0	0
mariner-21_df base	DNA	TcMar-Tc1	0	0	0	0	0	0	0	0	0	0	0	0
mariner-21_dk base	DNA	TcMar-Tc1	0	0	0	0	0	0	0	0	0	0	0	0
mariner-22_df base	DNA	TcMar-Tc1	0	0	0	0	0	0	0	0	0	0	0	0
mariner-22_dk base	DNA	TcMar-Tc1	0	0	0	0	0	0	0	0	0	0	0	0
mariner-23_df base	DNA	TcMar-Tc1	0	0	0	0	0	0	0	0	0	0	0	0
mariner-25_df base	DNA	TcMar-Tc1	0	0	0	0	0	0	0	0	0	0	0	0
mariner-26_df base	DNA	TcMar-Tc1	0	0	0	0	0	0	0	0	0	0	0	0
mariner-28_df base	DNA	TcMar-Tc1	0	0	0	0	0	0	0	0	0	0	0	0
mariner-29_df base	DNA	TcMar-Mariner	0	0	0	0	0	0	0	0	0	0	0	0
mariner-2_dbi base	DNA	TcMar-Tc1	0	0	0	0	0	0	0	0	0	0	0	0
mariner-2_dbp base	DNA	TcMar-Tc1	0	0	0	0	0	0	0	0	0	0	0	0
mariner-2_del base	DNA	TcMar-Mariner	0	0	0	0	0	0	0	0	0	0	0	0
mariner-2_der base	DNA	TcMar-Mariner	0	0	0	0	0	0	0	0	0	0	0	0
mariner-2_deu base	DNA	TcMar-Tc1	0	0	0	0	0	0	0	0	0	0	0	0
mariner-2_dk base	DNA	TcMar-Tc1	0	0	0	0	0	0	0	0	0	0	0	0
mariner-2_dmac base	DNA	TcMar-Mariner	0	0	0	0	0	0	0	0	0	0	0	0
mariner-2_drh base	DNA	TcMar-Tc1	0	0	0	0	0	0	0	0	0	0	0	0
mariner-2_dro base	DNA	TcMar-Mariner	0	0	0	0	0	0	0	0	0	0	0	0
mariner-2_dvi base	DNA	TcMar-Tc1	0	69	-6.12928	0	0	0	0	0	0	0	0	0
mariner-2_dya base	DNA	TcMar-Tc1	0	0	0	0	0	0	0	0	0	0	0	0
mariner-30_df base	DNA	TcMar-Tc1	0	0	0	0	0	0	0	0	0	0	0	0
mariner-3_dan base	DNA	TcMar-Tc1	0	0	0	0	0	0	0	0	0	0	0	0
mariner-3_dbi base	DNA	TcMar-Tc1	0	0	0	0	0	0	0	0	0	0	0	0
mariner-3_deu base	DNA	TcMar-Tc1	0	0	0	0	0	0	0	0	0	0	0	0
mariner-3_dro base	DNA	TcMar-Tc1	0	0	0	0	0	0	0	0	0	0	0	0
mariner-3_dt base	DNA	TcMar-Mariner	0	0	0	0	0	0	0	0	0	0	0	0
mariner-3_dya base	DNA	TcMar-Tc1	0	0	0	0	0	0	0	0	0	0	0	0
mariner-4_deu base	DNA	TcMar-Tc1	0	0	0	0	0	0	0	0	0	0	0	0
mariner-4_df base	DNA	TcMar-Tc1	0	0	0	0	0	0	0	0	0	0	0	0
mariner-4_dk base	DNA	TcMar-Tc1	0	79	-6.32193	0	0	0	0	0	0	0	0	0
mariner-5_dan base	DNA	TcMar-Tc1	0	0	0	0	0	0	0	0	0	0	0	0
mariner-5_dbi base	DNA	TcMar-Mariner	0	0	0	0	0	0	0	0	0	0	0	0
mariner-5_dbp base	DNA	TcMar-Tc1	0	0	0	0	0	0	0	0	0	0	0	0
mariner-5_deu base	DNA	TcMar-Tc1	0	0	0	0	0	0	0	0	0	0	0	0
mariner-5_df base	DNA	TcMar-Tc1	0	0	0	0	0	0	0	0	0	0	0	0
mariner-5_dk base	DNA	TcMar-Tc1	0	0	0	0	0	0	0	0	0	0	0	0
mariner-6_dan base	DNA	TcMar-Tc1	0	0	0	0	0	0	0	0	0	0	0	0
mariner-6_dbp base	DNA	TcMar-Tc1	0	15	-4	0	0	0	0	0	0	0	0	0
mariner-6_del base	DNA	TcMar-Mariner	0	0	0	0	0	0	0	0	0	0	0	0
mariner-6_dk base	DNA	TcMar-Tc1	0	0	0	0	0	0	0	0	0	0	0	0
mariner-6_dy base	DNA	TcMar-Tc1	0	0	0	0	0	0	0	0	0	0	0	0
mariner-7_dan base	DNA	TcMar-Tc1	0	0	0	0	0	0	0	0	0	0	0	0
mariner-7_dbi base	DNA	TcMar-Tc1	0	0	0	0	0	0	0	0	0	0	0	0
mariner-7_dbp base	DNA	TcMar-Tc1	0	0	0	0	0	0	0	0	0	0	0	0
mariner-7_df base	DNA	TcMar-Tc1	0	0	0	0	0	0	0	0	0	0	0	0
mariner-7_dk base	DNA	TcMar-Tc1	0	0	0	0	0	0	0	0	0	0	0	0
mariner-7_drh base	DNA	TcMar-Tc1	0	0	0	0	0	0	0	0	0	0	0	0
mariner-7n1_del base	DNA	TcMar-Mariner	0	0	0	0	0	0	0	0	0	0	0	0
mariner-8_dan base	DNA	TcMar-Tc1	0	0	0	0	0	0	0	0	0	0	0	0
mariner-8_dbp base	DNA	TcMar-Tc1	0	73	-6.20945	0	0	0	0	0	0	0	0	0
mariner-8_dk base	DNA	TcMar-Mariner	0	0	0	388	0	0	0	0	0	0	0	0
mariner-8_drh base	DNA	TcMar-Tc1	0	0	0	0	0	0	0	0	0	0	0	0
mariner-9_dbp base	DNA	TcMar-Tc1	0	0	0	0	0	0	0	0	0	0	0	0
mariner-9_df base	DNA	TcMar-Tc1	0	0	0	0	0	0	0	0	0	0	0	0
mariner-9_dk base	DNA	TcMar-Tc1	0	0	0	0	0	0	0	0	0	0	0	0
mariner1_dya base	DNA	TcMar-Mariner	0	0	0	0	0	0	0	0	0	0	0	0
marn-1_deu base	DNA	TcMar-Mariner	0	0	0	0	0	0	0	0	0	0	0	0
marn-2_deu base	DNA	TcMar-Tc1	0	0	0	0	0	0	0	0	0	0	0	0
marwolen1 base	DNA	TcMar-Tc1	0	0	0	0	0	0	0	0	0	0	0	0
merlin-1_df base	DNA	Merlin	0	0	0	0	0	0	0	0	0	0	0	0
merlin-1_dt base	DNA	Merlin	0	0	0	0	0	0	0	0	0	0	0	0
merlin-2_df base	DNA	Merlin	0	0	0	0	0	0	0	0	0	0	0	0
p-1_drh base	DNA	P	0	0	0	0	0	0	0	0	0	0	0	0
p-2_drh base	DNA	P	0	0	0	0	0	0	0	0	0	0	0	0
p-3_drh base	DNA	P	0	0	0	0	0	0	0	0	0	0	0	0
p_db base	DNA	P	0	0	0	0	68	-6.10852	0	68	-6.10852	0	68	-6.10852
paris base	DNA	TcMar-Tc1	0	0	0	0	0	0	0	0	0	0	0	0
parisa-1_dw base	DNA	TcMar-Tc1	0	0	0	0	0	0	0	0	0	0	0	0
parisa-2_dw base	DNA	TcMar-Tc1	0	0	0	0	0	0	0	0	0	0	0	0
parisa-5_dw base	DNA	TcMar-Tc1	0	0	0	0	0	0	0	0	0	0	0	0
parisa_dam base	DNA	TcMar-Tc1	0	0	0	0	0	0	0	0	0	0	0	0
parisa_dan base	DNA	TcMar-Tc1	0	0	0	0	0	0	0	0	0	0	0	0
parisa_dbu base	DNA	TcMar-Tc1	0	0	0	0	0	0	0	0	0	0	0	0
parisa_del base	DNA	TcMar-Tc1	0	0	0	0	0	0	0	0	0	0	0	0
parisa_deq base	DNA	TcMar-Tc1	0	0	0	0	0	0	0	0	0	0	0	0
parisa_dk base	DNA	TcMar-Tc1	0	0	0	0	0	0	0	0	0	0	0	0
parisa_dpe base	DNA	TcMar-Tc1	0	107	-6.75489	0	0	0	0	0	0	0	0	0
parisa_dpol base	DNA	TcMar-Tc1	0	0	0	0	0	0	0	0	0	0	0	0
parisa_dps base	DNA	TcMar-Tc1	0	0	0	0	0	0	0	0	0	0	0	0
parisa_drh base	DNA	TcMar-Tc1	0	0	0	0	0	0	0	0	0	0	0	0
parisa_dsu base	DNA	TcMar-Tc1	0	0	0	0	0	0	0	0	0	0	0	0
penelope2_dw base	Non-LTR_retrotransposon	Penelope	0	61	-5.9542	0	0	0	0	0	0	0	0	0
piggybac-1_dbi base	DNA	PiggyBac	0	0	0	0	0	0	0	0	0	0	0	0
piggybac-1_dbp base	DNA	PiggyBac	0	0	0	0	0	0	0	0	0	0	0	0
piggybac-1_deu base	DNA	PiggyBac	0	118	-6.89482	0	0	0	0	0	0	0	0	0
piggybac-1_df base	DNA	PiggyBac	0	0	0	0	0	0	0	0	0	0	0	0
piggybac-1_dw base	DNA	PiggyBac	0	83	-6.39232	0	0	0	0	0	0	0	0	0
piggybac-2_dan base	DNA	PiggyBac	0	0	0	0	0	0	0	0	0	0	0	0
piggybac-2_dbp base	DNA	PiggyBac	0	0	0	0	0	0	0	0	0	0	0	0
piggybac-2_df base	DNA	PiggyBac	0	58	-5.88264	0	0	0	0	0	0	0	0	0
piggybac-3_dbp base	DNA	PiggyBac	0	0	0	0	37	-5.24793	0	37	-5.24793	0	37	-5.24793
piggybac-3b_dan base	DNA	PiggyBac	0	0	0	0	0	0	0	0	0	0	0	0
piggybac-n1_dwil base	DNA	PiggyBac	0	0	0	0	0	0	0	0	0	0	0	0
placw_dm base	DNA	P	0	930	-9.86264	0	930	-9.86264	0	930	-9.86264	0	930	-9.86264
pogon1 base	DNA	TcMar-Pogo	0	5394	-12.3974	0	0	0	0	0	0	0	0	0
polinton-1_dbp base	DNA	Maverick	0	0	0	0	0	0	0	0	0	0	0	0
polinton-1_deu base	DNA	Maverick	0	0	0	0	0	0	0	0	0	0	0	0
polinton-2_dbp base	DNA	Maverick	0	0	0	0	0	0	0	0	0	0	0	0
r1-16_dwi base	Non-LTR_retrotransposon	R1	0	48	-5.61471	0	0	0	0	0	0	0	0	0
r1-1_del base	Non-LTR_retrotransposon	R1	0	104	-6.71425	0	0	0	0	0	0	0	0	0
r1-1_dper base	Non-LTR_retrotransposon	R1	0	46	-5.55459	0	0	0	0	0	0	0	0	0
r1-1b_dk base	Non-LTR_retrotransposon	R1	0	63	-6	0	63	-6	0	63	-6	0	63	-6
r1-3_deu base	Non-LTR_retrotransposon	R1	0	187	-7.55459	0	0	0	116	0	0	0	0	0
r1-5_dper base	Non-LTR_retrotransposon	R1	0	108	-6.76818	0	108	-6.76818	0	108	-6.76818	0	108	-6.76818
r1-5_dwi base	Non-LTR_retrotransposon	R1	0	47	-5.58496	0	0	0	0	0	0	0	0	0
r1_dvi base	Non-LTR_retrotransposon	R1	0	221	-7.79442	0	0	0	0	0	0	0	0	0
r2-1_dwi base	Non-LTR_retrotransposon	R2	0	49	-5.64386	0	49	-5.64386	0	49	-5.64386	0	49	-5.64386
rehavkus-1_da base	DNA	MULE-NOF	0	0	0	0	0	0	0	0	0	0	0	0
rte-1_dbp base	Non-LTR_retrotransposon	RTE-BovB	0	0	0	0	0	0	0	0	0	0	0	0
rte-2_dbp base	Non-LTR_retrotransposon	RTE-BovB	0	0	0	0	53	-5.75489	0	53	-5.75489	0	53	-5.75489
sola-1_dk base	DNA	Sola	0	0	0	0	0	0	0	0	0	0	0	0
stalker3 base	LTR	Gypsy	1228	8581	-2.99677	0	0	0	0	0	0	0	0	0
transib-1_deu base	DNA	CMC-Transib	0	0	0	0	0	0	0	0	0	0	0	0
transib-2_dan base	DNA	CMC-Transib	0	80	-6.33985	0	0	0	0	0	0	0	0	0
transib-2_df base	DNA	CMC-Transib	0	0	0	0	0	0	0	0	0	0	0	0
transib-2_dk base	DNA	CMC-Transib	0	0	0	0	0	0	0	0	0	0	0	0
transib-3_drh base	DNA	CMC-Transib	0	282	-8.14466	0	0	0	0	0	0	0	0	0
transib-5_dbi base	DNA	CMC-Transib	0	0	0	0	0	0	0	0	0	0	0	0
transib-5_dbp base	DNA	CMC-Transib	0	0	0	0	0	0	0	0	0	0	0	0
transib-5_dk base	DNA	CMC-Transib	0	0	0	0	0	0	0	0	0	0	0	0
transib-6_dbi base	DNA	CMC-Transib	0	67	-6.08746	0	0	0	0	0	0	0	0	0
transib-6_dk base	DNA	CMC-Transib	0	0	0	0	0	0	0	0	0	0	0	0
transib-7_dan base	DNA	CMC-Transib	0	0	0	0	0	0	0	0	0	0	0	0
transib-n1_dya base	DNA	CMC-Transib	0	0	0	0	0	0	0	0	0	0	0	0
transib1_dwil base	DNA	CMC-Transib	0	64	-6.02237	0	0	0	0	0	0	0	0	0
transib3_dp base	DNA	CMC-Transib	0	0	0	0	0	0	0	0	0	0	0	0
transibn2_dp base	DNA	CMC-Transib	0	0	0	0	0	0	0	0	0	0	0	0
transibn5_dp base	DNA	CMC-Transib	0	0	0	0	0	0	0	0	0	0	0	0
uhu base	DNA	TcMar-Tc1	0	0	0	0	0	0	0	0	0	0	0	0
zator-2_df base	DNA	Zator	0	0	0	0	0	0	0	0	0	0	0	0
