# Supplementary material for: Unique structure and positive selection promote the rapid divergence of Drosophila Y chromosomes
Source: eLife. 2022 Jan 6;11:e75795. doi: 10.7554/eLife.75795 (PMC8794474; doi:10.7554/eLife.75795)
Supplement: Supplementary file 19. — We used Blast v2.7.1+ [135] with blobtools (v1.0; [136]) to search the nt database (parameters “-task megablast -max_target_seqs 1 -max_hsps 1 -evalue 1e-25”). We estimated the Illumina coverage of each contig in males of D. mauritiana, D. simulans and D. sechellia, respectively. [file elife-75795-supp19.xlsx]

## Sheet: Illumina
Supplementary file 19. The Illumina coverage and blast result for each contig in the D. simulans clade. We used Blast v2.7.1+ [135] with blobtools (v1.0; [136]) to search the nt database (parameters “-task megablast -max_target_seqs 1 -max_hsps 1 -evalue 1e-25”). We estimated the Illumina coverage of each contig in males of D. mauritiana, D. simulans and D. sechellia, respectively.
Dmau
Contig/Scaffold name	Length	GC content	Illumina coverage	Phylum
Y_scaffold1	6535019	0.3998	39.498	Arthropoda
Y_scaffold2	1496441	0.3859	47.083	Arthropoda
Y_scaffold3	3576243	0.3945	37.504	Arthropoda
Y_scaffold4	2853986	0.4038	42.039	Arthropoda
Segkk29	410466	0.3843	150.005	Arthropoda
Segkk55	1161591	0.3464	135.417	Arthropoda
Segkk192	1214548	0.3998	100.933	Arthropoda
Segkk193	1711719	0.4047	88.288	Arthropoda
Segkk390	22121761	0.4375	90.423	Arthropoda
Segkk389	23216061	0.4259	94.049	Arthropoda
Segkk391	22745151	0.4331	48.239	Arthropoda
Segkk392	27405233	0.4351	90.464	Arthropoda
Segkk393	21002680	0.426	93.027	Arthropoda
Segkk36	2558136	0.4025	85.732	Arthropoda
tig00000102	683744	0.4037	168.657	Arthropoda
dmau-mito	18880	0.1875	18465.4	Arthropoda
Segkk202	756692	0.3951	100.269	Arthropoda
Wolbachia	1301795	0.3398	43.733	Proteobacteria
Contig3	817035	0.336	78.819	Arthropoda
Contig5	299869	0.3559	49.882	Arthropoda
Contig6	710282	0.3107	115.719	Arthropoda
Contig9	507535	0.3343	88.437	Arthropoda
Contig10	486155	0.4345	35.685	Arthropoda
Contig11	463361	0.4057	86.898	Arthropoda
Contig12	387585	0.3777	115.642	Arthropoda
Contig14	327229	0.4447	30.969	Arthropoda
Y_Contig15	510166	0.4299	43.699	Arthropoda
Contig16	233401	0.3352	129.118	Arthropoda
Y_Contig20	160451	0.4013	49.971	Arthropoda
Y_Contig21	157212	0.4331	32.721	Arthropoda
Contig22	159220	0.3215	109.269	Arthropoda
Y_Contig23	199297	0.3872	81.626	Arthropoda
Contig24	143768	0.3068	117.522	no-hit
Contig25	159100	0.4062	157.683	Arthropoda
Contig26	138800	0.3157	73.129	Arthropoda
Y_Contig27	95658	0.3957	98.416	Arthropoda
Contig28	81655	0.3128	59.707	Arthropoda
Y_Contig29	76142	0.4008	52.079	Arthropoda
Contig30	77800	0.3938	261.28	Arthropoda
Contig31	84234	0.4055	370.529	Arthropoda
Contig33	69562	0.3739	189.49	Arthropoda
Contig34	55555	0.3011	95.477	no-hit
Contig32	131738	0.3985	382.371	Arthropoda
Contig35	76008	0.3067	83.901	Arthropoda
Contig36	42510	0.2979	133.256	no-hit
Contig37	52380	0.5355	339.86	Arthropoda
Contig38	35886	0.3064	132.548	no-hit
Contig40	24746	0.3592	1740.62	Arthropoda
Contig39	73342	0.3789	82.406	Arthropoda
Contig41	62959	0.4523	339.841	Arthropoda
Y_Contig42	50575	0.4022	104.52	Arthropoda
Contig43	43350	0.4059	104.191	Arthropoda
Contig45	12301	0.354	1711.17	Arthropoda
Contig46	41674	0.3781	42.656	Arthropoda
Contig44	25197	0.4347	405.227	Arthropoda
Contig47	27001	0.3724	527.757	Arthropoda
Contig48	196464	0.3973	72.079	Arthropoda
Contig49	77456	0.3898	125.069	Arthropoda
Y_Contig50	34756	0.4076	90.738	Arthropoda
Contig51	287969	0.3337	90.864	Arthropoda
Contig52	120725	0.4072	95.981	Arthropoda
Contig53	127296	0.3596	242.693	Arthropoda
Contig54	36045	0.4575	79.163	Arthropoda
Contig55	96242	0.3852	104.675	Arthropoda
Contig56	33232	0.4072	71.056	Arthropoda
Contig57	74278	0.3885	92.223	Arthropoda
Y_Contig58	60128	0.4009	290.862	Arthropoda
Contig61	37990	0.3462	41.216	Arthropoda
Contig60	37267	0.4267	245.152	Arthropoda
Contig62	86346	0.3932	110.163	Arthropoda
Contig63	34780	0.3874	91.843	Arthropoda
Y_Contig64	20764	0.3217	136.937	Arthropoda
Contig66	75821	0.4141	70.661	Arthropoda
Contig65	85412	0.3676	114.521	Arthropoda
Contig67	69592	0.3734	95.27	Arthropoda
Contig68	35033	0.4267	74.486	Arthropoda
Contig69	78965	0.3643	119.619	Arthropoda
Contig70	24635	0.3952	68.729	Arthropoda
Y_Contig71	33683	0.4328	96.243	Arthropoda
Y_Contig72	130624	0.432	95.246	Arthropoda
Y_Contig73	79424	0.3628	118.615	Arthropoda
Contig74	31703	0.3621	137.011	Arthropoda
Contig75	60565	0.3434	93.2	Arthropoda
Contig76	40573	0.3912	96.606	Arthropoda
Contig77	96592	0.3361	103.942	Arthropoda
Contig78	88816	0.3302	69.069	Arthropoda
Contig79	48268	0.3938	91.14	Arthropoda
Y_Contig80	46203	0.3905	88.026	Arthropoda
Contig82	71651	0.3249	47.73	Arthropoda
Y_Contig81	42701	0.3025	432.203	Arthropoda
Contig83	56857	0.3676	317.111	Arthropoda
Contig84	46781	0.3727	110.552	Arthropoda
Contig85	42030	0.324	64.939	Arthropoda
Y_Contig86	51807	0.4011	163.55	Arthropoda
Contig87	28953	0.3728	51.616	Arthropoda
Contig88	29541	0.3937	54.578	Arthropoda
Contig89	28841	0.3133	154.632	Arthropoda
Contig90	32819	0.3861	434.99	Arthropoda
Contig91	28517	0.3929	137.309	Arthropoda
Y_Contig92	25005	0.3199	154.339	Arthropoda
Y_Contig93	130841	0.4079	40.628	Arthropoda
Y_Contig94	41272	0.4045	19.902	Arthropoda
Y_Contig95	66271	0.402	75.79	Arthropoda
Y_Contig97	39713	0.3702	51.378	Arthropoda
Y_Contig98	40751	0.3518	63.984	Arthropoda
Y_Contig99	25406	0.4748	30.712	Arthropoda
Y_Contig100	27406	0.3944	59.734	Arthropoda
Y_Contig101	377941	0.3996	35.393	Arthropoda
Contig102	232591	0.3736	99.723	Arthropoda
Y_Contig103	231646	0.405	57.744	Arthropoda
Y_Contig104	80980	0.4518	21.239	Arthropoda
Contig105	42124	0.3076	73.355	no-hit
Y_Contig106	49316	0.3653	110.157	Arthropoda
Y_Contig108	71164	0.3843	111.47	Arthropoda
Y_Contig109	82046	0.3984	35.076	Arthropoda
Contig110	94370	0.4075	185.162	Arthropoda
Contig111	124610	0.3642	52.799	Arthropoda
Contig112	52043	0.3411	40.945	Arthropoda
Contig113	54057	0.42	77.726	Arthropoda
Contig114	111385	0.3907	116.925	Arthropoda
Contig115	78886	0.33	32.951	Arthropoda
Contig116	42210	0.3767	87.188	Arthropoda
Y_Contig117	54714	0.3597	93.8	Arthropoda
Y_Contig118	31150	0.365	79.756	Arthropoda
Contig119	82975	0.4236	69.122	Arthropoda
Contig120	93676	0.3289	38.578	Arthropoda
Contig121	29654	0.4072	109.711	Arthropoda
Contig123	19335	0.3043	74.095	no-hit
Y_Contig122	33242	0.4235	73.133	Arthropoda
Contig125	14598	0.3139	23.676	Arthropoda
Contig124	67174	0.3019	85.461	Arthropoda
Contig126	28689	0.3222	80.169	Arthropoda
Contig127	46032	0.3133	345.59	Arthropoda
Contig128	47145	0.2862	246.78	Arthropoda
Contig129	37146	0.2867	234.612	Arthropoda
Contig131	11960	0.2852	109.258	Arthropoda
Y_Contig130	23068	0.4757	24.995	Arthropoda
Y_Contig132	14751	0.4792	6.739	Arthropoda
Contig133	280649	0.4055	33.485	Arthropoda
Contig134	124894	0.2905	130.241	Arthropoda
Y_Contig135	146884	0.4309	39.714	Arthropoda
Y_Contig136	89222	0.3398	44.061	Arthropoda
Contig137	98281	0.4684	1034.3	Arthropoda
Contig138	39379	0.4116	40.744	Arthropoda
Contig139	43201	0.4142	796.977	Arthropoda
Contig140	37281	0.5601	282.325	Arthropoda
Contig141	38387	0.4154	308.359	Arthropoda
Contig143	48599	0.2932	50.564	no-hit
Contig146	65997	0.3828	167.553	Arthropoda
Contig147	391789	0.3467	66.888	Arthropoda
Dsim
Contig/Scaffold name	Length	GC content	Illumina coverage	Phylum
Y_scaffold1	1750668	0.3918	46.49	Arthropoda
Y_scaffold3	1190122	0.3972	64.109	Arthropoda
Y_scaffold4	980417	0.3885	45.317	Arthropoda
Y_scaffold5	1989154	0.397	44.311	Arthropoda
Y_Contig_1	1614193	0.4007	41.479	Arthropoda
Contig_2	1504241	0.3376	84.835	Arthropoda
Contig_4	680032	0.3691	109.305	Arthropoda
Contig_5	708595	0.3098	124.223	Arthropoda
Contig_6	616267	0.3624	86.737	Arthropoda
Contig_7	605987	0.3668	47.637	Arthropoda
Contig_8	756062	0.3809	87.288	Arthropoda
Contig_10	495037	0.3241	100.494	Arthropoda
Y_Contig_11	444569	0.4026	35.858	Arthropoda
Contig_12	410753	0.3952	73.111	Arthropoda
Y_Contig_13	763957	0.4114	40.179	Arthropoda
Contig_14	267482	0.4612	83.53	Arthropoda
Y_Contig_16	211058	0.3985	34.154	Arthropoda
Contig_17	193396	0.5228	90.216	Arthropoda
Contig_18	183261	0.431	80.773	Arthropoda
Contig_20	154370	0.4673	109.07	Arthropoda
Contig_21	161896	0.4243	66.203	Arthropoda
Contig_22	97672	0.4711	98.342	Arthropoda
Contig_23	135673	0.295	216.094	Arthropoda
Contig_24	102849	0.309	286.473	Arthropoda
Contig_25	78084	0.3457	387.475	Arthropoda
Contig_26	76992	0.3311	258.04	Arthropoda
Contig_27	80405	0.4002	89.958	Arthropoda
Y_Contig_28	77886	0.3868	43.284	Arthropoda
Contig_29	107717	0.4139	230.034	Arthropoda
Contig_30	163249	0.3455	83.535	Arthropoda
Contig_31	57969	0.5181	18.32	Arthropoda
Contig_34	23979	0.385	1288.8	Arthropoda
Contig_35	20218	0.2728	12.74	Arthropoda
Y_Contig_33	59935	0.4405	20.648	Arthropoda
Y_Contig_36	41160	0.3687	41.817	Arthropoda
Contig_32	60203	0.2971	289.619	Arthropoda
Y_Contig_37	67764	0.4315	26.388	Arthropoda
Contig_38	313602	0.391	107.308	Arthropoda
Contig_40	89410	0.4067	96.322	Arthropoda
Contig_41	56089	0.3958	82.705	Arthropoda
Contig_42	72452	0.3949	110.013	Arthropoda
Contig_43	32858	0.4153	92.094	Arthropoda
Contig_39	223881	0.3902	110.566	Arthropoda
Contig_45	64008	0.3956	105.54	Arthropoda
Contig_44	140691	0.3967	87.455	Arthropoda
Contig_46	60978	0.4047	96.39	Arthropoda
Contig_50	50731	0.373	110.011	Arthropoda
Contig_51	81027	0.3958	113.764	Arthropoda
Contig_52	41736	0.4347	86.632	Arthropoda
Contig_53	41581	0.4132	103.971	Arthropoda
Contig_54	44959	0.4077	102.261	Arthropoda
Contig_49	32389	0.416	90.357	Arthropoda
Contig_55	55286	0.4097	83.08	Arthropoda
Contig_57	29238	0.3965	68.939	Arthropoda
Y_Contig_47	29054	0.4039	86.721	Arthropoda
Contig_58	48484	0.4054	88.898	Arthropoda
Contig_56	53875	0.397	109.885	Arthropoda
Contig_60	45917	0.3862	110.535	Arthropoda
Contig_61	34432	0.4335	91.539	Arthropoda
Contig_59	48562	0.3963	91.055	Arthropoda
Contig_48	70225	0.3905	101.506	Arthropoda
Contig_65	39328	0.3954	104.532	Arthropoda
Contig_68	125990	0.4228	165.948	Arthropoda
Contig_64	37616	0.3806	86.824	Arthropoda
Contig_70	52990	0.3927	224.664	Arthropoda
Contig_71	38653	0.4478	32.157	Arthropoda
Y_Contig_69	46591	0.3278	255.124	Arthropoda
Contig_72	79471	0.4419	45.539	Arthropoda
Contig_73	40995	0.4216	45.003	Arthropoda
Contig_74	47780	0.4605	31.63	Arthropoda
Contig_75	39452	0.4115	33.821	Arthropoda
Contig_76	37641	0.3782	37.695	Arthropoda
Contig_78	36759	0.4144	30.833	Arthropoda
Contig_79	41754	0.4155	41.253	Arthropoda
Contig_80	48813	0.4388	42.784	Arthropoda
Contig_81	43353	0.4384	32.958	Arthropoda
Contig_82	41892	0.4361	49.168	Arthropoda
Contig_83	41295	0.4315	32.181	Arthropoda
Contig_84	43975	0.4186	47.038	Arthropoda
Contig_85	48757	0.4063	46.126	Arthropoda
Contig_77	37407	0.3912	44.018	Arthropoda
Contig_86	41285	0.4275	29.291	Arthropoda
Contig_88	39858	0.4188	21.631	Arthropoda
Contig_89	40256	0.4243	30.448	Arthropoda
Contig_90	47845	0.417	44.541	Arthropoda
Contig_91	24243	0.3163	66.523	Arthropoda
Contig_93	36152	0.3001	309.174	no-hit
Y_Contig_94	49673	0.1432	146.886	no-hit
Y_Contig_92	37066	0.2936	101.304	Arthropoda
Contig_95	13909	0.554	0.298	Proteobacteria
Contig_96	26545	0.574	0.007	Proteobacteria
Contig_87	34581	0.399	18.215	Arthropoda
Contig_97	24785	0.4127	1009.82	Arthropoda
Contig_98	32390	0.4408	31.47	Arthropoda
Contig_99	35572	0.371	11.498	Arthropoda
Y_Contig_100	38029	0.3502	44.467	Arthropoda
Contig_101	34351	0.392	51.153	Arthropoda
Contig_102	77349	0.3562	31.52	Arthropoda
Contig_105	65275	0.4188	91.4	Arthropoda
Contig_103	55983	0.4045	94.374	Arthropoda
Contig_107	61545	0.4835	17.516	Arthropoda
Contig_109	35721	0.3044	29.24	no-hit
Contig_108	43322	0.4106	90.909	Arthropoda
Contig_110	35454	0.3421	355.796	Arthropoda
Contig_106	63869	0.3608	163.093	Arthropoda
Contig_111	78654	0.3114	117.119	Arthropoda
Contig_112	60731	0.3078	42.132	no-hit
Y_Contig_113	55899	0.4254	27.906	Arthropoda
Contig_104	35322	0.3835	101.575	Arthropoda
Contig_114	46040	0.3065	47.85	no-hit
Contig_115	611222	0.319	85.932	Arthropoda
Y_Contig_121	85444	0.4289	32.405	Arthropoda
Contig_119	87193	0.3898	96.017	Arthropoda
Contig_120	56401	0.3964	92.396	Arthropoda
Contig_125	60338	0.2007	1195.87	no-hit
Contig_123	118195	0.3536	198.254	Arthropoda
Contig_127	64135	0.4629	38.713	Arthropoda
Contig_128	54626	0.4204	40.277	Arthropoda
Contig_129	29955	0.4431	24.995	Arthropoda
Contig_131	27919	0.2521	30.933	no-hit
Contig_130	61540	0.4043	63.138	Arthropoda
Contig_132	24622	0.569	0.002	Proteobacteria
Contig_133	32562	0.57	0.112	Proteobacteria
Y_Contig_126	93014	0.3882	41.507	Arthropoda
Contig_124	111733	0.2924	117.862	Arthropoda
Contig_122	126849	0.3915	111.627	Arthropoda
Contig_134	230462	0.3452	294.149	Arthropoda
Y_Contig_135	3241906	0.4005	43.897	Arthropoda
Contig_136	1332206	0.3637	91.353	Arthropoda
Contig_137	582592	0.336	47.985	Arthropoda
Y_Contig_138	63141	0.235	23.847	Arthropoda
Y_Contig_141	189254	0.423	37.139	Arthropoda
Contig_145	44290	0.4122	230.94	Arthropoda
Contig_144	149720	0.385	258.616	Arthropoda
Contig_146	43107	0.4319	555.795	Arthropoda
Segkk66	805939	0.4127	122.99	Arthropoda
Segkk64	1158440	0.347	146.343	Arthropoda
Segkk144	21496096	0.4251	97.215	Arthropoda
Segkk212	2718223	0.4038	103.077	Arthropoda
Segkk232	19704629	0.4411	92.179	Arthropoda
Segkk233	2916130	0.4041	103.747	Arthropoda
Segkk234	27688330	0.4347	93.114	Arthropoda
Segkk235	25884059	0.423	96.587	Arthropoda
mitochondrion_genome	19147	0.1907	22153.8	Arthropoda
Segkk236	22910358	0.4332	47.949	Arthropoda
Y_scaffold2	611102	0.3421	98.497	Arthropoda
Dsech
Contig/Scaffold name	Length	GC content	Illumina coverage	Phylum
Y_scaffold6	474986	0.3836	49.466	Arthropoda
Y_scaffold7	1795691	0.3993	39.395	Arthropoda
Wol	1288563	0.3508	0.028	Proteobacteria
Segkk15	841085	0.4091	49.208	Arthropoda
Segkk20	4183694	0.4208	47.16	Arthropoda
Segkk53	188370	0.405	48.058	Arthropoda
Segkk85	117250	0.4073	54.173	Arthropoda
Segkk57	239646	0.3996	56.045	Arthropoda
Segkk301	208297	0.4047	50.457	Arthropoda
Segkk307	821658	0.3989	83.668	Arthropoda
Segkk433	1645638	0.394	89.724	Arthropoda
Segkk434	5679423	0.4346	45.587	Arthropoda
Segkk435	30228065	0.431	89.976	Arthropoda
Segkk436	23008942	0.4257	92.716	Arthropoda
Segkk437	19907892	0.4395	90.102	Arthropoda
Segkk439	1539794	0.4052	94.803	Arthropoda
Segkk440	7767177	0.4389	44.409	Arthropoda
Segkk442	1209450	0.4143	47.312	Arthropoda
Segkk402_part1	671249	0.4236	56.563	Arthropoda
Segkk402_part2	1181221	0.4238	49.251	Arthropoda
mito	18598	0.1906	17465	Arthropoda
Segkk311_part1	1222670	0.3503	128.553	Arthropoda
Segkk311_part2	1892544	0.4069	98.709	Arthropoda
Contig1	110659	0.3024	47.876	no-hit
Contig2	23695	0.3774	420.836	Arthropoda
Contig3	65268	0.3916	349.818	Arthropoda
Contig4	79884	0.5316	132.586	Arthropoda
Segkk441	21123995	0.4247	92.613	Arthropoda
Contig6	92207	0.3995	552.707	Arthropoda
Y_Contig7	75675	0.4001	42.537	Arthropoda
Y_Contig9	10686	0.3637	26.958	Arthropoda
Y_Contig8	93515	0.3659	40.907	Arthropoda
Y_Contig10	27734	0.2949	31.634	Arthropoda
Contig11	76755	0.3954	121.009	Arthropoda
Contig13	109548	0.4265	113.713	Arthropoda
Contig14	370706	0.4054	107.654	Arthropoda
Contig16	58891	0.4116	119.405	Arthropoda
Contig15	221275	0.3971	127.474	Arthropoda
Contig20	69556	0.4276	115.678	Arthropoda
Contig21	34781	0.4073	76.449	Arthropoda
Contig22	50722	0.388	131.08	Arthropoda
Contig19	47155	0.3896	128.459	Arthropoda
Contig18	109181	0.411	134.3	Arthropoda
Contig24	44635	0.3683	127.789	Arthropoda
Contig25	67757	0.3905	128.748	Arthropoda
Contig26	29336	0.4235	93.728	Arthropoda
Contig28	20459	0.3952	67.641	Arthropoda
Contig30	81548	0.3943	94.513	Arthropoda
Contig32	43733	0.3947	72.49	Arthropoda
Contig33	38712	0.4017	127.847	Arthropoda
Contig34	41761	0.4201	118.248	Arthropoda
Contig29	74389	0.3943	121.661	Arthropoda
Contig35	50502	0.3868	121.096	Arthropoda
Contig39	37454	0.3647	66.772	Arthropoda
Contig42	39222	0.3852	108.362	Arthropoda
Contig40	96620	0.3923	434.668	Arthropoda
Contig44	72473	0.3939	0	Proteobacteria
Contig43	104913	0.3973	188.821	Arthropoda
Y_Contig38	62041	0.3675	131.507	Arthropoda
Y_Contig45	55978	0.3862	78.418	Arthropoda
Contig47	62417	0.4103	131.899	Arthropoda
Contig48	86995	0.3058	37.412	Arthropoda
Contig46	98481	0.3677	202.894	Arthropoda
Contig49	70755	0.3941	122.425	Arthropoda
Contig50	39171	0.3928	163.523	Arthropoda
Contig51	49996	0.4347	98.107	Arthropoda
Contig52	58048	0.4182	103.708	Arthropoda
Y_Contig54	44770	0.3578	167.923	Arthropoda
Y_Contig53	113889	0.3988	37.469	Arthropoda
Contig57	53164	0.42	41.512	Arthropoda
Contig58	48714	0.3743	225.393	Arthropoda
Contig59	28673	0.383	527.152	Arthropoda
Y_Contig60	54247	0.337	0.001	Firmicutes
Contig61	40800	0.3762	34.176	Arthropoda
Contig62	36920	0.4329	26.617	Arthropoda
Contig64	36610	0.3847	1049.45	Arthropoda
Contig65	33895	0.3714	846.011	Arthropoda
Contig66	51231	0.3691	214.226	Arthropoda
Contig67	30896	0.3857	1071.85	Arthropoda
Contig68	57139	0.398	263.111	Arthropoda
Contig69	38934	0.4346	842.326	Arthropoda
Contig71	55858	0.3861	262.254	Arthropoda
Contig73	46479	0.3814	356.505	Arthropoda
Contig74	31031	0.3786	208.148	Arthropoda
Contig70	36583	0.3534	86.473	Arthropoda
Contig72	56406	0.3766	432.092	Arthropoda
Contig75	19913	0.3459	101.317	Arthropoda
Contig76	37801	0.336	0	Firmicutes
Contig79	20606	0.4289	944.866	Arthropoda
Contig77	30941	0.3963	856.722	Arthropoda
Contig78	28495	0.369	51.29	Arthropoda
Contig83	27747	0.5252	0	Proteobacteria
Contig80	22763	0.3809	515.393	Arthropoda
Contig85	33362	0.2516	243.466	no-hit
Contig86	17962	0.3568	16.35	Arthropoda
Contig88	26594	0.3859	222.579	Arthropoda
Contig84	47921	0.4422	543.139	Arthropoda
Contig90	21519	0.3793	296.609	Arthropoda
Contig89	49541	0.4636	311.602	Arthropoda
Contig91	27571	0.3859	0.001	Firmicutes
Contig92	18508	0.4231	1738.34	Arthropoda
Contig95	29565	0.3804	164.443	Arthropoda
Contig93	25944	0.3346	71.026	Arthropoda
Contig94	33657	0.3834	521.765	Arthropoda
Contig81	23038	0.3763	232.002	Arthropoda
Contig97	24209	0.385	1713.86	Arthropoda
Contig98	19230	0.6056	339.073	Arthropoda
Y_Contig99	8914	0.3474	31.963	Arthropoda
Contig103	26794	0.3758	315.463	Arthropoda
Contig100	19036	0.3457	181.379	Arthropoda
Contig102	7993	0.4689	237.681	Arthropoda
Contig101	15341	0.3626	21.246	Arthropoda
Contig104	23654	0.3791	3759.47	Arthropoda
Contig96	47213	0.3831	486.017	Arthropoda
Contig105	156772	0.4162	31.329	Arthropoda
Y_Contig106	202440	0.4234	29.32	Arthropoda
Contig107	31763	0.2997	14.961	Arthropoda
Contig108	97762	0.321	42.919	Arthropoda
Contig109	28479	0.3807	42.958	Arthropoda
Y_Contig110	32618	0.4221	22.856	Arthropoda
Y_Contig112	29770	0.3649	17.923	Arthropoda
Y_Contig113	488852	0.4108	36.395	Arthropoda
Contig115	48943	0.3787	211.252	Arthropoda
Contig116	52124	0.3756	579.642	Arthropoda
Y_Contig119	22950	0.4522	49.605	Arthropoda
Y_Contig120	138125	0.413	44.215	Arthropoda
Contig121	260198	0.4068	105.778	Arthropoda
Contig122	135018	0.4062	126.668	Arthropoda
Contig123	73995	0.408	119.083	Arthropoda
Y_Contig125	64034	0.3811	82.292	Arthropoda
Contig124	110132	0.4126	85.28	Arthropoda
Y_Contig128	13329	0.4285	41.446	Arthropoda
Y_Contig129	23648	0.4331	19.965	Arthropoda
Contig126	44382	0.3925	108.152	Arthropoda
Y_Contig127	88971	0.3504	74.381	Arthropoda
Contig131	32830	0.3698	116.278	Arthropoda
Y_Contig132	24884	0.4513	29.598	Arthropoda
Contig134	46282	0.3817	136.423	Arthropoda
Contig137	29844	0.4013	29.353	Arthropoda
Contig138	34864	0.4506	90.357	Arthropoda
Y_Contig140	40189	0.38	21.264	Arthropoda
Y_Contig141	37921	0.3931	51.683	Arthropoda
Y_Contig135	43312	0.3227	62.662	Arthropoda
Contig139	33055	0.4232	88.195	Arthropoda
Contig143	30454	0.4154	104.964	Arthropoda
Contig142	113182	0.3929	109.288	Arthropoda
Contig136	50040	0.3876	142.193	Arthropoda
Y_Contig146	42431	0.3258	15.856	Arthropoda
Contig145	88487	0.3961	103.355	Arthropoda
Y_Contig149	15150	0.3597	229.73	Arthropoda
Y_Contig148	22369	0.4926	81.189	Arthropoda
Contig151	50443	0.3916	142.574	Arthropoda
Contig133	108725	0.4238	109.496	Arthropoda
Contig153	39674	0.3322	25.792	Arthropoda
Contig152	115750	0.402	166.082	Arthropoda
Contig156	26445	0.3392	40.73	Arthropoda
Contig147	69644	0.4029	102.041	Arthropoda
Y_Contig157	140228	0.4201	66.899	Arthropoda
Contig159	124233	0.4015	61.905	Arthropoda
Y_Contig160	27392	0.3753	78.389	Arthropoda
Y_Contig158	40112	0.3572	148.418	Arthropoda
Y_Contig161	57599	0.353	162.384	Arthropoda
Contig164	103600	0.3782	241.304	Arthropoda
Y_Contig162	108837	0.3744	60.359	Arthropoda
Contig167	41124	0.3758	185.615	Arthropoda
Contig166	69047	0.36	138.693	Arthropoda
Contig168	14348	0.4596	521.861	Arthropoda
Contig165	51543	0.3798	468.53	Arthropoda
Contig170	39453	0.4329	656.466	Arthropoda
Contig169	35411	0.4112	223.728	Arthropoda
Contig172	22419	0.436	22.466	Arthropoda
Contig174	42531	0.0012	1.044	no-hit
Y_Contig163	15667	0.3734	96.188	Arthropoda
Contig176	6529	0.297	0.303	no-hit
Y_Contig177	14316	0.3304	28.57	Arthropoda
Contig173	38196	0.381	191.082	Arthropoda
Contig175	41360	0.3493	13.286	Arthropoda
Y_Contig171	49203	0.3318	118.347	Arthropoda
Y_Contig178	2476668	0.4062	39.706	Arthropoda
Contig179	1455235	0.4444	31.061	Arthropoda
Contig181	918712	0.3211	81.208	Arthropoda
Contig182	870036	0.3731	152.194	Arthropoda
Contig183	836637	0.3296	39.116	Arthropoda
Contig185	782309	0.3399	89.939	Arthropoda
Y_Contig186	606903	0.419	36.865	Arthropoda
Contig188	604365	0.3059	83.709	Arthropoda
Contig190	673702	0.3277	82.56	Arthropoda
Contig191	431077	0.3853	48.016	Arthropoda
Contig193	599927	0.4167	92.098	Arthropoda
Contig195	364922	0.4018	54.905	Arthropoda
Contig196	316049	0.3151	162.88	Arthropoda
Contig197	403492	0.4096	50.866	Arthropoda
Contig199	1377690	0.3249	110.296	Arthropoda
Contig200	242461	0.3475	157.239	Arthropoda
Y_Contig201	253113	0.4205	51.485	Arthropoda
Y_Contig202	298449	0.3873	36.937	Arthropoda
Y_Contig204	194991	0.3638	60.528	Arthropoda
Contig206	174931	0.3043	68.615	Arthropoda
Contig207	137543	0.4205	66.6	Arthropoda
Contig208	137321	0.3121	64.945	Arthropoda
Y_Contig209	152006	0.3617	49.024	Arthropoda
Y_Contig211	104616	0.4248	37.001	Arthropoda
Contig212	79306	0.3935	239.63	Arthropoda
Contig210	138311	0.4048	124.999	Arthropoda
Contig213	68246	0.4202	128.609	Arthropoda
Contig214	139560	0.3519	140.396	Arthropoda
Y_Contig215	67812	0.3683	103.971	Arthropoda
Y_Contig217	86086	0.362	106.197	Arthropoda
Contig216	54983	0.3328	318.486	Arthropoda
Contig218	40662	0.4005	499.349	Arthropoda
Contig219	46210	0.3944	125.375	Arthropoda
Contig221	54920	0.3838	1412.7	Arthropoda
Contig220	62225	0.3937	121.016	Arthropoda
Contig222	28794	0.3603	1282.03	Arthropoda
Contig223	218433	0.4811	28.688	Arthropoda
Y_scaffold2	855017	0.3796	50.185	Arthropoda
Y_scaffold3	904777	0.3583	57.454	Arthropoda
Y_scaffold4	690933	0.3816	49.283	Arthropoda
Y_scaffold5	948649	0.3925	91.463	Arthropoda
Y_scaffold1	2167772	0.3997	38.49	Arthropoda
Y_Contig1	555130	0.4228	33.616	Arthropoda
tig00000001	4462667	0.4041	0.002	Proteobacteria
tig00000005	72478	0.3937	0	Proteobacteria
tig00000009	14926	0.3716	0	Firmicutes
tig00000014	4964	0.5079	0.914	Firmicutes
tig00002385	11477	0.3464	144.55	Arthropoda
tig00002386	5668	0.3059	47.401	Arthropoda
Segkk438	4248035	0.4003	83.721	Arthropoda
