# Supplementary material for: Unique structure and positive selection promote the rapid divergence of Drosophila Y chromosomes
Source: eLife. 2022 Jan 6;11:e75795. doi: 10.7554/eLife.75795 (PMC8794474; doi:10.7554/eLife.75795)
Supplement: Supplementary file 20. [file elife-75795-supp20.xlsx]

## Sheet: Sheet1
Supplementary file 20. The summary of reads data used in this study
SRA accession	Species	Tissues	Data type	References
Pacbio or nanopore
PRJNA383250	D. simulans	D. simulans wXD1 male adults	Pacbio	Chakraborty et al. 2021
PRJNA383250	D. mauritiana	D. mauritiana w12 male adults	Pacbio	Chakraborty et al. 2021
PRJNA383250	D. sechellia	D. sechellia Rob12 male adults	Pacbio	Chakraborty et al. 2021
GCA_015852585.1	D. melanogaster	Pi2	Oxford Nanopore	Wierzbicki et al. 2021
GCA_004798075.2	D. melanogaster	DGRP-732	Oxford Nanopore	Shah et al. 2021
GCA_004798055.1	D. melanogaster	DGRP-379	Oxford Nanopore	Shah et al. 2021
GCA_003397115.2	D. melanogaster	B6	Pacbio	Chakraborty et al. 2019
GCA_003401975.1	D. melanogaster	B2 (CA1)	Pacbio	Chakraborty et al. 2019
GCA_003402005.1	D. melanogaster	B4 (RVC 3)	Pacbio	Chakraborty et al. 2019
GCA_003401855.1	D. melanogaster	A5 (VAG 1)	Pacbio	Chakraborty et al. 2019
GCA_003401805.1	D. melanogaster	A2 (BOG1)	Pacbio, excluded due to excess of indel singleton	Chakraborty et al. 2019
GCA_003402015.1	D. melanogaster	ORE	Pacbio	Chakraborty et al. 2019
GCA_003401685.1	D. melanogaster	AB8 (SAM ry506)	Pacbio	Chakraborty et al. 2019
GCA_003401915.1	D. melanogaster	A7	Pacbio	Chakraborty et al. 2019
GCA_003401885.1	D. melanogaster	A6(Wild 5B)	Pacbio	Chakraborty et al. 2019
GCA_003401795.1	D. melanogaster	A3 (BS1)	Pacbio	Chakraborty et al. 2019
GCA_003401925.1	D. melanogaster	B1 (BER 1)	Pacbio	Chakraborty et al. 2019
GCA_003401735.1	D. melanogaster	A1 (Canton-S)	Pacbio	Chakraborty et al. 2019
GCA_002300595.1	D. melanogaster	A4	Pacbio	Chakraborty et al. 2017
GCA_003402055.1	D. melanogaster	B3 (QI2)	Pacbio	Chakraborty et al. 2019
GCA_003401745.1	D. melanogaster	A4 (KSA 2)	Pacbio	Chakraborty et al. 2019
GCA_018904365.1	D. melanogaster	14021-0231.36	Oxford Nanopore	Kim et al. 2021
PCR-free DNA-seq
Submitted to NCBI	D. simulans	D. simulans wXD1 male adults	Illumina	This study
SRR6399446	D. simulans	D. simulans winter male adults	Illumina	Wei et al. 2018
SRR6399447	D. simulans	D. simulans winter female adults	Illumina	Wei et al. 2018
Submitted to NCBI	D. mauritiana	D. mauritiana w12 male adults	Illumina	This study
SRR1560267	D. mauritiana	D. mauritiana r61 female adults	Illumina	Garrigan et al. 2012
Submitted to NCBI	D. sechellia	D. sechellia Rob12 male adults	Illumina	This study
SRR6399452	D. sechellia	D. sechellia Rob12 male adults	Illumina	Wei et al. 2018
SRR6399453	D. sechellia	D. sechellia Rob12 female adults	Illumina	Wei et al. 2018
RNA-seq
SRR1197315	D. melanogaster	male adults	Illumina, total RNA	Gerstein et al. 2014
SRR1197413	D. melanogaster	male adults	Illumina, total RNA	Gerstein et al. 2014
SRR1197297,SRR1197377	D. melanogaster	testes	Illumina, total RNA	Gerstein et al. 2014
SRR1197301,SRR1197381	D. melanogaster	testes	Illumina, total RNA	Gerstein et al. 2014
SRR070422	D. melanogaster	mated males, testes	Illumina, mRNA	Modencode, Smibert et al. 2012
SRR350960	D. melanogaster	mated males, testes	Illumina, mRNA	Modencode, Smibert et al. 2012
SRR350961	D. melanogaster	testes	Illumina, mRNA	Modencode, Smibert et al. 2012
SRR5388567	D. melanogaster	testes	Illumina, mRNA	Laktionov et. al. 2018
SRR5388568	D. melanogaster	testes	Illumina, mRNA	Laktionov et. al. 2018
SRR9025056	D. mauritiana	male adults	Illumina, mRNA	Chakraborty et al. 2021
SRR9025047	D. mauritiana	male adults	Illumina, mRNA	Chakraborty et al. 2021
SRR9025048	D. mauritiana	male adults	Illumina, mRNA	Chakraborty et al. 2021
SRR9025049	D. mauritiana	female adults	Illumina, mRNA	Chakraborty et al. 2021
SRR9025050	D. mauritiana	female adults	Illumina, mRNA	Chakraborty et al. 2021
SRR9025051	D. mauritiana	female adults	Illumina, mRNA	Chakraborty et al. 2021
SRR9025052	D. mauritiana	testes	Illumina, mRNA	Chakraborty et al. 2021
SRR9025053	D. mauritiana	testes	Illumina, mRNA	Chakraborty et al. 2021
SRR9025054	D. mauritiana	testes	Illumina, mRNA	Chakraborty et al. 2021
SRR9025061	D. simulans	male adults	Illumina, mRNA	Chakraborty et al. 2021
SRR9025062	D. simulans	male adults	Illumina, mRNA	Chakraborty et al. 2021
SRR9025063	D. simulans	male adults	Illumina, mRNA	Chakraborty et al. 2021
SRR9025064	D. simulans	female adults	Illumina, mRNA	Chakraborty et al. 2021
SRR9025057	D. simulans	female adults	Illumina, mRNA	Chakraborty et al. 2021
SRR9025058	D. simulans	female adults	Illumina, mRNA	Chakraborty et al. 2021
SRR9025059	D. simulans	female adults	Illumina, mRNA	Chakraborty et al. 2021
SRR7410596	D. simulans	testes	Illumina, total RNA	Lin et al. 2018
SRR7410597	D. simulans	testes	Illumina, total RNA	Lin et al. 2018
SRR9025060	D. simulans	testes	Illumina, mRNA	Chakraborty et al. 2021
SRR9025055	D. simulans	testes	Illumina, mRNA	Chakraborty et al. 2021
SRR7410589	D. simulans	testes	Illumina, small RNA	Lin et al. 2018
SRR7410590	D. simulans	testes	Illumina, small RNA	Lin et al. 2018
SRR9025045	D. sechellia	male adults	Illumina, mRNA	Chakraborty et al. 2021
SRR9025046	D. sechellia	female adults	Illumina, mRNA	Chakraborty et al. 2021
