# Supplementary material for: Unique structure and positive selection promote the rapid divergence of Drosophila Y chromosomes
Source: eLife. 2022 Jan 6;11:e75795. doi: 10.7554/eLife.75795 (PMC8794474; doi:10.7554/eLife.75795)
Supplement: Supplementary file 21. — We listed the coverage of each SNP in Y-linked gene from each RNA-seq replicate and DNA-seq. We also recorded their frequency in our assembly and their translated amino acid. We estimated the expression level of each variant based on the SNP frequency in the genome. We also performed Welch’s t-test to compare SNP frequency from DNA-seq and assemblies to it from RNA-seq. We further identify the SNPs associated with the allele that change more than 5 TPM compared to its estimated expression level from its frequency. The SNPs significant in the Welch’s t-test and located in lowly or highly expressing alleles are chosen to perform the Chi-square test. [file elife-75795-supp21.xlsx]

## Sheet: sim
Gene	loc	anc	anc_or_major	alt	Anc_aa	Dervived_aa	Changes	anc_or_major_count in genome	alt_count in genome	anc_or_major_count in illumina DNA-seq	alt_count in illumina DNA-seq	anc_or_major_count in illumina RNA-seq R1	alt_count in illumina RNA-seq R1	anc_or_major_count in illumina RNA-seq R2	alt_count in illumina RNA-seq R2	anc_or_major_count in illumina RNA-seq R3	alt_count in illumina RNA-seq R3	anc_or_major_count in illumina RNA-seq R4	alt_count in illumina RNA-seq R4	genome	illumina DNA-seq	RNA-seq R1	RNA-seq R2	RNA-seq R3	RNA-seq R4	Welch Two Sample t-test	Diff	make 5 TPM diff
CK2ßtes-Y	12	C	C	A	P	P	S	103	1	2	0	102	0	205	0	118	0	93	0	0.00961538	0	0	0	0	0	0.5	0.00480769	0
CK2ßtes-Y	13	C	C	A	Q	K	N	103	1	2	0	103	0	205	0	119	0	94	0	0.00961538	0	0	0	0	0	0.5	0.00480769	0
CK2ßtes-Y	14	A	A	T	Q	L	N	102	2	9	0	102	2	208	3	118	6	93	3	0.0192308	0	0.0192308	0.014218	0.0483871	0.03125	0.249781	-0.0186561	0
CK2ßtes-Y	15	G	G	C	Q	H	N	103	1	11	0	113	0	217	0	125	0	99	0	0.00961538	0	0	0	0	0	0.5	0.00480769	0
CK2ßtes-Y	18	C	C	A	N	K	N	102	2	13	0	27	2	53	4	30	6	34	2	0.0192308	0	0.0689655	0.0701754	0.166667	0.0555556	0.0466566	-0.0807254	1
CK2ßtes-Y	21	C	C	T	N	N	S	103	1	20	0	38	0	63	0	44	0	45	0	0.00961538	0	0	0	0	0	0.5	0.00480769	0
CK2ßtes-Y	29	G	G	C	S	T	N	103	1	198	0	535	0	886	0	417	0	335	0	0.00961538	0	0	0	0	0	0.5	0.00480769	0
CK2ßtes-Y	30	C	C	T	S	S	S	103	1	200	4	536	1	888	0	422	0	340	0	0.00961538	0.0196078	0.0018622	0	0	0	0.213548	0.0141461	0
CK2ßtes-Y	33	C	C	T	S	S	S	100	2	214	8	550	1	902	11	425	8	337	11	0.0196078	0.036036	0.00181488	0.0120482	0.0184758	0.0316092	0.359007	0.0118349	0
CK2ßtes-Y	35	G	G	C	W	S	N	102	2	234	1	566	1	934	1	444	0	356	0	0.0192308	0.00425532	0.00176367	0.00106952	0	0	0.378893	0.0110347	0
CK2ßtes-Y	36	G	G	A	W	STOP	N	99	4	231	8	542	20	899	38	425	18	333	19	0.038835	0.0334728	0.0355872	0.040555	0.0406321	0.0539773	0.244062	-0.00653399	0
CK2ßtes-Y	38	T	T	C	I	T	N	103	1	248	3	584	0	965	0	457	0	360	0	0.00961538	0.0119522	0	0	0	0	0.0687085	0.0107838	0
CK2ßtes-Y	42	T	T	A	S	R	N	102	2	256	6	618	6	1035	12	489	9	396	8	0.0192308	0.0229008	0.00961538	0.0114613	0.0180723	0.019802	0.113497	0.00632802	0
CK2ßtes-Y	44	G	G	T	W	L	N	97	6	245	24	600	40	1032	71	462	45	364	46	0.0582524	0.0892193	0.0625	0.0643699	0.0887574	0.112195	0.709463	-0.00821973	0
CK2ßtes-Y	49	C	C	T	L	F	N	101	2	283	5	519	117	956	145	461	55	387	35	0.0194175	0.0173611	0.183962	0.131698	0.106589	0.0829384	0.0154022	-0.107908	1
CK2ßtes-Y	63	C	C	T	G	G	S	99	2	327	8	529	142	1052	153	515	59	445	43	0.019802	0.0238806	0.211624	0.126971	0.102787	0.0881148	0.0275728	-0.110533	1
CK2ßtes-Y	65	A	A	T	N	I	N	101	1	335	9	676	1	1228	6	587	3	491	6	0.00980392	0.0261628	0.0014771	0.00486224	0.00508475	0.0120724	0.365599	0.0121092	0
CK2ßtes-Y	66	C	C	G	N	K	N	103	1	347	5	676	16	1253	11	600	6	517	6	0.00961538	0.0142045	0.0231214	0.00870253	0.00990099	0.0114723	0.748594	-0.00138933	0
CK2ßtes-Y	71	T	A	G	F	Y	N	95	7	319	35	658	45	1186	86	545	55	460	49	0.0686275	0.0988701	0.0640114	0.0676101	0.0916667	0.0962672	0.847414	0.00385993	0
CK2ßtes-Y	75	C	C	G	L	L	S	102	1	377	10	724	6	1297	29	579	28	496	23	0.00970874	0.0258398	0.00821918	0.0218703	0.0461285	0.044316	0.378138	-0.0123592	0
CK2ßtes-Y	77	G	G	T	C	F	N	102	1	393	2	734	0	1331	1	588	0	504	0	0.00970874	0.00506329	0	0.000750751	0	0	0.196717	0.00719833	0
CK2ßtes-Y	79	C	C	A	R	S	N	100	3	386	10	724	12	1323	11	552	8	488	7	0.0291262	0.0252525	0.0163043	0.00824588	0.0142857	0.0141414	0.0168766	0.013945	0
CK2ßtes-Y	82	G	G	A	V	M	N	55	46	169	231	411	313	793	532	221	295	218	259	0.455446	0.5775	0.43232	0.401509	0.571705	0.542977	0.72933	0.0293447	0
CK2ßtes-Y	84	G	G	A	V	V	S	101	2	408	9	746	6	1350	18	528	8	471	12	0.0194175	0.0215827	0.00797872	0.0131579	0.0149254	0.0248447	0.235932	0.00527343	0
CK2ßtes-Y	85	C	C	G	P	A	N	101	1	418	2	745	13	1347	28	530	8	484	1	0.00980392	0.0047619	0.0171504	0.0203636	0.0148699	0.00206186	0.252949	-0.00632853	0
CK2ßtes-Y	88	A	A	G	I	V	N	102	1	425	6	760	17	1410	13	529	8	484	6	0.00970874	0.0139211	0.021879	0.00913563	0.0148976	0.0122449	0.475736	-0.00272436	0
CK2ßtes-Y	95	A	A	T	Y	F	N	56	43	189	254	661	162	1003	397	272	240	266	233	0.434343	0.573363	0.196841	0.283571	0.46875	0.466934	0.22307	0.149829	0
CK2ßtes-Y	103	G	G	A	E	K	N	98	1	468	5	843	18	1489	14	487	8	506	6	0.010101	0.0105708	0.0209059	0.0093147	0.0161616	0.0117188	0.199701	-0.00418933	0
CK2ßtes-Y	104	A	A	T	E	V	N	98	1	463	5	822	12	1499	12	489	5	493	0	0.010101	0.0106838	0.0143885	0.00794176	0.0101215	0	0.505812	0.00227946	0
CK2ßtes-Y	107	C	C	G	T	R	N	98	1	479	8	836	6	1507	15	496	4	493	5	0.010101	0.0164271	0.00712589	0.00985545	0.008	0.0100402	0.380837	0.00450868	0
CK2ßtes-Y	114	C	C	A	N	K	N	58	1	214	11	728	4	1144	7	307	2	304	4	0.0169492	0.0488889	0.00546448	0.00608167	0.00647249	0.012987	0.357453	0.0251676	0
CK2ßtes-Y	117	G	G	A	Q	Q	S	101	1	501	1	905	0	1587	0	510	0	510	0	0.00980392	0.00199203	0	0	0	0	0.372384	0.00589798	0
CK2ßtes-Y	119	T	T	A	M	K	N	92	1	490	7	905	2	1580	4	507	5	505	6	0.0107527	0.0140845	0.00220507	0.00252525	0.00976562	0.0117417	0.12116	0.00585919	0
CK2ßtes-Y	121	G	G	A	G	S	N	92	1	461	8	861	3	1494	13	469	10	467	6	0.0107527	0.0170576	0.00347222	0.00862641	0.0208768	0.012685	0.638237	0.00249002	0
CK2ßtes-Y	122	G	G	C	G	A	N	80	6	417	48	855	20	1467	49	467	34	464	28	0.0697674	0.103226	0.0228571	0.0323219	0.0678643	0.0569106	0.180925	0.0415082	0
CK2ßtes-Y	123	C	C	A	G	G	S	91	2	464	22	896	4	1523	23	519	14	520	10	0.0215054	0.0452675	0.00444444	0.0148771	0.0262664	0.0188679	0.362707	0.0172725	0
CK2ßtes-Y	124	C	C	T	L	L	S	92	1	483	3	902	0	1544	1	535	0	540	0	0.0107527	0.00617284	0	0.000647249	0	0	0.169814	0.00830095	0
CK2ßtes-Y	130	T	T	A	Y	N	N	93	1	467	12	886	14	1546	37	545	35	530	29	0.0106383	0.0250522	0.0155556	0.0233733	0.0603448	0.0518784	0.201412	-0.0199428	0
CK2ßtes-Y	137	C	C	A	T	N	N	93	1	484	5	914	2	1609	8	621	5	583	7	0.0106383	0.0102249	0.00218341	0.00494743	0.00798722	0.0118644	0.173884	0.00368601	0
CK2ßtes-Y	141	G	G	A	E	E	S	93	1	482	2	831	13	1488	27	602	8	543	4	0.0106383	0.00413223	0.0154028	0.0178218	0.0131148	0.00731261	0.265183	-0.00602773	0
CK2ßtes-Y	144	A	A	G	T	T	S	102	1	489	7	820	2	1454	7	595	6	528	5	0.00970874	0.0141129	0.00243309	0.00479124	0.00998336	0.00938086	0.182849	0.00526368	0
CK2ßtes-Y	154	A	A	G	I	V	N	100	1	488	6	786	1	1386	7	609	5	534	5	0.00990099	0.0121457	0.00127065	0.00502513	0.00814332	0.00927644	0.0741039	0.00509449	0
CK2ßtes-Y	156	C	C	A	I	I	S	8	94	37	465	46	742	100	1313	78	568	67	500	0.921569	0.926295	0.941624	0.929229	0.879257	0.881834	0.39551	0.0159457	0
CK2ßtes-Y	160	A	A	G	N	D	N	102	1	501	9	794	12	1428	13	651	9	592	10	0.00970874	0.0176471	0.0148883	0.00902151	0.0136364	0.0166113	0.97834	0.000138521	0
CK2ßtes-Y	161	A	A	G	N	S	N	102	1	503	3	801	4	1439	5	657	3	599	5	0.00970874	0.00592885	0.00496894	0.0034626	0.00454545	0.00827815	0.386513	0.00250501	0
CK2ßtes-Y	162	T	T	G	N	K	N	102	1	501	16	803	4	1436	7	656	5	594	8	0.00970874	0.0309478	0.00495663	0.004851	0.0075643	0.013289	0.439611	0.012663	0
CK2ßtes-Y	163	C	C	A	P	T	N	102	1	516	5	809	0	1447	0	659	0	596	0	0.00970874	0.00959693	0	0	0	0	0.00368695	0.00965283	0
CK2ßtes-Y	164	C	C	T	P	L	N	67	36	412	105	274	424	654	627	429	185	385	164	0.349515	0.203095	0.60745	0.489461	0.301303	0.298725	0.251906	-0.14793	0
CK2ßtes-Y	166	G	G	C	V	L	N	101	2	515	2	649	13	1173	18	564	7	499	5	0.0194175	0.00386847	0.0196375	0.0151134	0.0122592	0.00992063	0.796367	-0.00258969	0
CK2ßtes-Y	167	T	T	G	V	G	N	9	92	45	454	50	563	87	1046	71	480	65	411	0.910891	0.90982	0.918434	0.923213	0.871143	0.863445	0.372043	0.0162965	0
CK2ßtes-Y	168	G	G	T	V	V	S	100	3	502	13	592	29	1105	38	521	44	457	34	0.0291262	0.0252427	0.0466989	0.0332458	0.0778761	0.0692464	0.0606459	-0.0295823	0
CK2ßtes-Y	175	A	A	G	S	G	N	101	1	514	12	617	0	1153	10	575	4	478	7	0.00980392	0.0228137	0	0.00859845	0.00690846	0.014433	0.381455	0.00882383	0
CK2ßtes-Y	176	G	G	T	S	I	N	101	1	526	5	630	0	1187	11	584	4	488	6	0.00980392	0.0094162	0	0.00918197	0.00680272	0.0121457	0.392863	0.00257745	0
CK2ßtes-Y	178	T	T	C	S	P	N	99	3	510	24	583	41	1112	76	538	40	450	42	0.0294118	0.0449438	0.0657051	0.0639731	0.0692042	0.0853659	0.074203	-0.0338843	0
CK2ßtes-Y	179	C	C	T	S	F	N	100	3	518	15	600	27	1159	41	530	49	465	38	0.0291262	0.0281426	0.0430622	0.0341667	0.0846287	0.0755467	0.0870199	-0.0307167	0
CK2ßtes-Y	182	T	T	C	L	S	N	102	1	539	2	625	8	1185	10	598	4	525	6	0.00970874	0.00369686	0.0126382	0.0083682	0.00664452	0.0112994	0.485919	-0.0030348	0
CK2ßtes-Y	183	G	G	T	L	F	N	69	34	437	104	239	397	591	600	417	172	371	154	0.330097	0.192237	0.624214	0.503778	0.29202	0.293333	0.203812	-0.16717	0
CK2ßtes-Y	187	T	T	A	W	R	N	102	1	532	1	641	0	1187	0	586	0	527	0	0.00970874	0.00187617	0	0	0	0	0.378474	0.00579246	0
CK2ßtes-Y	188	G	G	A	W	STOP	N	94	9	521	19	640	0	1188	2	578	0	525	0	0.0873786	0.0351852	0	0.00168067	0	0	0.257805	0.0608617	0
CK2ßtes-Y	189	G	G	T	W	C	N	34	68	165	366	136	501	281	894	187	376	184	330	0.666667	0.689266	0.786499	0.760851	0.667851	0.642023	0.386533	-0.03634	0
CK2ßtes-Y	191	T	T	C	V	A	N	102	1	548	2	645	0	1189	0	588	1	527	0	0.00970874	0.00363636	0	0	0.00169779	0	0.282954	0.0062481	0
CK2ßtes-Y	192	C	C	A	V	V	S	94	9	533	21	646	0	1191	1	592	0	529	0	0.0873786	0.0379061	0	0.000838926	0	0	0.240132	0.0624327	0
CK2ßtes-Y	193	T	T	G	F	V	N	101	2	531	22	644	5	1182	14	584	8	514	13	0.0194175	0.039783	0.00770416	0.0117057	0.0135135	0.0246679	0.356104	0.0152024	0
CK2ßtes-Y	195	C	C	T	F	F	S	102	1	549	9	666	2	1209	10	601	3	529	8	0.00970874	0.016129	0.00299401	0.00820345	0.00496689	0.0148976	0.32035	0.0051534	0
CK2ßtes-Y	198	C	C	A	G	G	S	102	2	554	14	546	103	1052	123	546	42	474	37	0.0192308	0.0246479	0.158706	0.104681	0.0714286	0.072407	0.0288102	-0.0798662	1
CK2ßtes-Y	202	G	G	A	E	K	N	104	1	564	9	615	3	1124	3	552	8	493	6	0.00952381	0.0157068	0.00485437	0.00266193	0.0142857	0.012024	0.398884	0.00415879	0
CK2ßtes-Y	208	A	A	C	K	Q	N	98	6	503	40	595	13	1041	50	529	29	479	17	0.0576923	0.0736648	0.0213816	0.0458295	0.0519713	0.0342742	0.0955509	0.0273144	0
CK2ßtes-Y	212	G	G	T	W	L	N	72	1	307	0	513	0	854	0	383	0	343	0	0.0136986	0	0	0	0	0	0.5	0.00684932	0
CK2ßtes-Y	214	T	T	C	Y	H	N	104	1	543	6	588	2	1059	11	545	3	483	10	0.00952381	0.010929	0.00338983	0.0102804	0.00547445	0.020284	0.928887	0.000369227	0
CK2ßtes-Y	217	G	G	A	G	S	N	104	2	551	5	554	8	1026	12	543	5	482	9	0.0188679	0.00899281	0.0142349	0.0115607	0.00912409	0.0183299	0.92249	0.000617966	0
CK2ßtes-Y	218	G	G	T	G	V	N	105	1	547	8	572	0	1057	0	574	1	505	0	0.00943396	0.0144144	0	0	0.00173913	0	0.126989	0.0114894	0
CK2ßtes-Y	220	A	A	T	M	L	N	72	34	434	104	230	299	567	457	397	160	359	127	0.320755	0.193309	0.565217	0.446289	0.287253	0.261317	0.249957	-0.132987	0
CK2ßtes-Y	226	C	C	T	H	Y	N	102	3	517	20	506	10	993	20	523	13	464	15	0.0285714	0.0372439	0.0193798	0.0197433	0.0242537	0.0313152	0.222517	0.00923465	0
CK2ßtes-Y	227	A	A	C	H	P	N	62	42	386	143	179	332	457	538	291	218	271	184	0.403846	0.270321	0.649706	0.540704	0.428291	0.404396	0.166806	-0.16869	0
CK2ßtes-Y	230	C	C	T	A	V	N	104	1	533	11	520	2	974	13	503	5	438	5	0.00952381	0.0202206	0.00383142	0.0131712	0.00984252	0.0112867	0.491154	0.00533924	0
CK2ßtes-Y	232	C	C	G	R	G	N	104	1	542	4	505	0	954	1	496	0	425	0	0.00952381	0.00732601	0	0.00104712	0	0	0.0714241	0.00816313	0
CK2ßtes-Y	236	A	A	T	Y	F	N	103	1	511	9	503	1	947	4	495	2	414	2	0.00961538	0.0173077	0.00198413	0.0042061	0.00402414	0.00480769	0.233026	0.00970602	0
CK2ßtes-Y	238	A	A	G	I	V	N	102	2	516	6	531	0	987	0	503	1	425	0	0.0192308	0.0114943	0	0	0.00198413	0	0.157063	0.0148665	0
CK2ßtes-Y	240	C	C	T	I	I	S	65	38	249	270	389	150	668	331	291	214	236	181	0.368932	0.520231	0.278293	0.331331	0.423762	0.434053	0.479501	0.0777217	0
CK2ßtes-Y	241	A	A	C	M	L	N	103	1	512	9	535	0	993	9	504	2	419	9	0.00961538	0.0172745	0	0.00898204	0.00395257	0.021028	0.45863	0.00495427	0
CK2ßtes-Y	245	C	C	T	S	L	N	91	11	503	22	525	9	965	28	511	10	432	5	0.107843	0.0419048	0.0168539	0.0281974	0.0191939	0.0114416	0.33647	0.0559522	0
CK2ßtes-Y	246	G	G	T	S	S	S	102	1	520	7	549	1	1014	4	521	2	443	2	0.00970874	0.0132827	0.00181818	0.00392927	0.00382409	0.00449438	0.112347	0.00797925	0
CK2ßtes-Y	250	C	C	A	R	R	S	93	9	470	38	491	57	875	97	433	61	371	47	0.0882353	0.0748031	0.104015	0.0997942	0.123482	0.11244	0.0653556	-0.0284135	0
CK2ßtes-Y	254	G	G	A	G	D	N	94	10	494	21	556	0	975	2	485	0	411	1	0.0961538	0.0407767	0	0.00204708	0	0.00242718	0.248166	0.0673467	0
CK2ßtes-Y	255	C	C	G	G	G	S	101	3	501	12	509	40	898	62	432	32	369	30	0.0288462	0.0233918	0.0728597	0.0645833	0.0689655	0.075188	0.00248226	-0.0442802	1
CK2ßtes-Y	256	G	G	A	V	M	N	68	4	399	25	252	103	525	131	321	47	278	39	0.0555556	0.0589623	0.290141	0.199695	0.127717	0.123028	0.0467529	-0.127887	1
CK2ßtes-Y	262	G	G	A	D	N	N	12	58	56	342	66	288	120	540	72	325	62	249	0.828571	0.859296	0.813559	0.818182	0.81864	0.800643	0.274143	0.0311779	0
CK2ßtes-Y	269	G	G	C	R	P	N	75	19	438	41	462	104	857	157	472	50	383	41	0.202128	0.085595	0.183746	0.154832	0.0957854	0.0966981	0.882323	0.011096	0
CK2ßtes-Y	280	G	G	A	E	K	N	102	2	504	12	570	4	1030	11	504	12	403	7	0.0192308	0.0232558	0.00696864	0.0105668	0.0232558	0.0170732	0.175697	0.00677719	0
CK2ßtes-Y	286	G	G	C	G	R	N	57	47	198	284	385	133	619	349	223	231	200	147	0.451923	0.589212	0.256757	0.360537	0.508811	0.423631	0.249607	0.133133	0
CK2ßtes-Y	287	G	G	A	G	E	N	104	1	478	10	507	2	958	5	457	6	344	3	0.00952381	0.0204918	0.00392927	0.00519211	0.012959	0.00864553	0.391731	0.00732634	0
CK2ßtes-Y	288	G	G	C	G	G	S	54	51	194	296	369	142	578	369	213	250	174	169	0.485714	0.604082	0.277886	0.389652	0.539957	0.492711	0.246031	0.119846	0
CK2ßtes-Y	290	A	A	G	D	G	N	102	1	482	12	496	9	928	20	485	6	371	5	0.00970874	0.0242915	0.0178218	0.021097	0.01222	0.0132979	0.923357	0.000890953	0
CK2ßtes-Y	291	C	C	A	D	E	N	104	1	498	11	502	9	954	20	493	7	390	5	0.00952381	0.021611	0.0176125	0.0205339	0.014	0.0126582	0.934223	-0.000633753	0
CK2ßtes-Y	294	C	C	T	F	F	S	103	1	511	1	510	5	964	6	474	1	387	3	0.00961538	0.00195312	0.00970874	0.00618557	0.00210526	0.00769231	0.89736	-0.000638714	0
CK2ßtes-Y	295	G	G	A	E	K	N	102	2	514	3	509	9	959	15	474	5	381	10	0.0192308	0.00580271	0.0173745	0.0154004	0.0104384	0.0255754	0.612041	-0.00468046	0
CK2ßtes-Y	297	A	A	G	E	E	S	103	1	506	2	512	0	963	0	469	0	387	0	0.00961538	0.00393701	0	0	0	0	0.252594	0.0067762	0
CK2ßtes-Y	303	T	T	A	C	STOP	N	102	1	508	6	503	0	938	0	452	0	376	0	0.00970874	0.0116732	0	0	0	0	0.0583243	0.0106909	0
CK2ßtes-Y	305	C	C	A	P	Q	N	100	3	509	14	517	1	973	6	464	3	377	7	0.0291262	0.0267686	0.0019305	0.0061287	0.00642398	0.0182292	0.00802159	0.0197693	0
CK2ßtes-Y	307	A	A	G	K	E	N	102	1	520	0	516	0	966	1	473	0	390	1	0.00970874	0	0	0.00103413	0	0.00255754	0.563717	0.00395645	0
CK2ßtes-Y	312	C	C	T	L	L	S	103	2	513	4	522	7	973	13	483	7	405	8	0.0190476	0.00773694	0.0132325	0.0131846	0.0142857	0.0193705	0.822788	-0.00162604	0
CK2ßtes-Y	313	T	T	C	S	P	N	104	1	507	2	525	1	979	1	482	0	406	0	0.00952381	0.00392927	0.00190114	0.00102041	0	0	0.270908	0.00599615	0
CK2ßtes-Y	314	C	C	A	S	Y	N	104	1	524	7	530	5	991	2	486	6	413	3	0.00952381	0.0131827	0.00934579	0.0020141	0.0121951	0.00721154	0.274225	0.0036616	0
CK2ßtes-Y	315	C	C	T	S	S	S	103	1	524	1	514	18	972	16	482	7	410	4	0.00961538	0.00190476	0.0338346	0.0161943	0.0143149	0.00966184	0.127063	-0.0127413	0
CK2ßtes-Y	320	G	G	C	R	T	N	104	1	541	0	529	0	986	0	469	0	404	0	0.00952381	0	0	0	0	0	0.5	0.0047619	0
CK2ßtes-Y	321	G	G	T	R	S	N	104	1	535	9	507	11	930	38	438	25	371	23	0.00952381	0.0165441	0.0212355	0.0392562	0.0539957	0.0583756	0.0318557	-0.0301818	1
CK2ßtes-Y	322	C	C	T	Q	STOP	N	104	1	544	8	513	11	940	38	453	25	384	22	0.00952381	0.0144928	0.0209924	0.0388548	0.0523013	0.0541872	0.0263515	-0.0295756	1
CK2ßtes-Y	325	A	A	G	K	E	N	104	1	544	1	501	12	947	11	493	2	412	3	0.00952381	0.00183486	0.0233918	0.0114823	0.0040404	0.00722892	0.375272	-0.00585651	0
CK2ßtes-Y	328	A	A	G	T	A	N	10	95	62	476	60	448	133	817	80	405	56	352	0.904762	0.884758	0.88189	0.86	0.835052	0.862745	0.0903003	0.0348385	0
CK2ßtes-Y	330	C	C	A	T	T	S	95	10	505	37	521	2	952	1	513	1	434	0	0.0952381	0.0682657	0.00382409	0.00104932	0.00194553	0	0.105219	0.0800472	0
CK2ßtes-Y	332	T	T	C	L	P	N	103	2	526	8	479	39	891	58	470	30	399	27	0.0190476	0.0149813	0.0752896	0.061117	0.06	0.0633803	0.000295685	-0.0479323	1
CK2ßtes-Y	333	T	T	G	L	L	S	14	91	89	447	104	412	211	737	127	352	96	320	0.866667	0.833955	0.79845	0.777426	0.734864	0.769231	0.046499	0.0803182	1
CK2ßtes-Y	334	C	C	G	P	A	N	99	6	524	33	513	6	916	39	483	26	415	21	0.0571429	0.059246	0.0115607	0.0408377	0.0510806	0.0481651	0.109913	0.0202834	0
CK2ßtes-Y	339	G	G	T	V	V	S	104	1	574	7	536	0	959	3	514	2	444	6	0.00952381	0.0120482	0	0.0031185	0.00387597	0.0133333	0.146459	0.00570405	0
CK2ßtes-Y	342	C	C	G	G	G	S	102	2	571	9	501	11	909	27	499	12	418	12	0.0192308	0.0155172	0.0214844	0.0288462	0.0234834	0.027907	0.0552718	-0.00805621	0
CK2ßtes-Y	343	C	C	T	P	S	N	103	1	573	5	509	0	925	3	508	2	427	6	0.00961538	0.00865052	0	0.00323276	0.00392157	0.0138568	0.286624	0.00388017	0
CK2ßtes-Y	344	C	C	T	P	L	N	103	1	572	8	497	7	913	12	502	6	429	5	0.00961538	0.0137931	0.0138889	0.012973	0.011811	0.0115207	0.756279	-0.000844162	0
CK2ßtes-Y	350	A	A	C	D	A	N	101	3	559	13	472	0	870	0	495	2	442	0	0.0288462	0.0227273	0	0	0.00402414	0	0.0551715	0.0247807	0
CK2ßtes-Y	354	G	G	A	V	V	S	103	1	549	7	440	13	810	31	448	12	401	9	0.00961538	0.0125899	0.0286976	0.0368609	0.026087	0.0219512	0.00811896	-0.0172965	0
CK2ßtes-Y	355	T	T	G	W	G	N	102	2	543	4	445	0	819	0	425	0	378	0	0.0192308	0.00731261	0	0	0	0	0.268671	0.0132717	0
CK2ßtes-Y	357	G	G	T	W	C	N	51	53	190	344	269	169	368	433	153	254	145	221	0.509615	0.644195	0.385845	0.540574	0.624079	0.603825	0.694072	0.0383244	0
CK2ßtes-Y	358	G	G	C	G	R	N	102	2	533	1	442	0	818	1	436	0	390	0	0.0192308	0.00187266	0	0.001221	0	0	0.447218	0.0102465	0
CK2ßtes-Y	359	G	G	T	G	V	N	53	48	349	186	184	251	458	333	290	141	256	131	0.475248	0.347664	0.577011	0.420986	0.327146	0.338501	0.962257	-0.00445572	0
CK2ßtes-Y	362	A	A	C	K	T	N	102	2	547	2	436	0	797	0	449	0	394	0	0.0192308	0.00364299	0	0	0	0	0.380814	0.0114369	0
CK2ßtes-Y	364	T	T	C	S	P	N	101	2	549	2	438	0	796	1	465	0	405	1	0.0194175	0.00362976	0	0.00125471	0	0.00246305	0.406703	0.0105942	0
CK2ßtes-Y	365	C	C	T	S	F	N	102	2	551	5	441	0	802	1	471	0	409	0	0.0192308	0.00899281	0	0.00124533	0	0	0.225026	0.0138005	0
CK2ßtes-Y	366	C	C	T	S	S	S	102	2	552	1	442	0	807	0	472	1	407	0	0.0192308	0.00180832	0	0	0.00211416	0	0.456004	0.009991	0
CK2ßtes-Y	367	A	A	G	N	D	N	103	1	550	4	430	6	787	7	473	3	404	2	0.00961538	0.00722022	0.0137615	0.00881612	0.00630252	0.00492611	0.988918	-3.37539e-05	0
CK2ßtes-Y	368	A	A	C	N	T	N	101	2	548	5	431	1	790	0	485	0	411	1	0.0194175	0.00904159	0.00231481	0	0	0.00242718	0.236035	0.013044	0
CK2ßtes-Y	369	C	C	A	N	K	N	61	40	280	261	321	83	492	241	266	174	222	159	0.39604	0.48244	0.205446	0.328786	0.395455	0.417323	0.201305	0.102488	0
CK2ßtes-Y	375	G	G	A	K	K	S	95	7	483	41	406	25	718	69	449	51	386	41	0.0686275	0.0782443	0.0580046	0.0876747	0.102	0.0960187	0.315932	-0.0124887	0
CK2ßtes-Y	376	A	A	G	I	V	N	101	1	515	3	430	0	784	1	497	1	421	2	0.00980392	0.00579151	0	0.00127389	0.00200803	0.00472813	0.159908	0.0057952	0
CK2ßtes-Y	381	C	C	T	F	F	S	100	2	523	12	426	10	773	22	493	8	422	9	0.0196078	0.0224299	0.0229358	0.027673	0.0159681	0.0208817	0.778157	-0.000845743	0
CK2ßtes-Y	388	C	C	T	R	C	N	103	1	526	4	388	14	699	25	455	12	397	7	0.00961538	0.00754717	0.0348259	0.0345304	0.0256959	0.0173267	0.0157471	-0.0195135	0
CK2ßtes-Y	390	C	C	T	R	R	S	99	3	506	7	372	17	666	16	417	12	370	9	0.0294118	0.0136452	0.0437018	0.0234604	0.027972	0.0237467	0.477263	-0.00819174	0
CK2ßtes-Y	396	C	C	G	N	K	N	63	39	243	251	298	98	468	261	270	182	226	162	0.382353	0.508097	0.247475	0.358025	0.402655	0.417526	0.362626	0.088805	0
CK2ßtes-Y	403	T	T	C	Y	H	N	53	1	337	10	171	12	421	33	288	13	255	19	0.0185185	0.0288184	0.0655738	0.0726872	0.0431894	0.0693431	0.0117739	-0.0390299	1
CK2ßtes-Y	410	T	T	C	L	P	N	54	1	343	6	172	2	441	9	273	5	265	5	0.0181818	0.017192	0.0114943	0.02	0.0179856	0.0185185	0.745078	0.000687302	0
CK2ßtes-Y	424	C	C	G	Q	E	N	54	2	361	5	161	3	448	10	282	5	272	4	0.0357143	0.0136612	0.0182927	0.0218341	0.0174216	0.0144928	0.653	0.00667747	0
CK2ßtes-Y	427	C	C	A	L	M	N	67	3	353	16	166	5	442	28	281	15	267	11	0.0428571	0.0433604	0.0292398	0.0595745	0.0506757	0.0395683	0.818125	-0.00165578	0
CK2ßtes-Y	435	A	A	G	G	G	S	78	1	377	2	176	1	469	0	268	0	262	0	0.0126582	0.00527704	0.00564972	0	0	0	0.258933	0.00755521	0
CK2ßtes-Y	436	G	G	A	A	T	N	78	1	386	0	178	2	475	0	281	0	267	0	0.0126582	0	0.0111111	0	0	0	0.676501	0.00355134	0
CK2ßtes-Y	437	C	C	G	A	G	N	78	1	394	0	178	0	477	0	280	0	265	0	0.0126582	0	0	0	0	0	0.5	0.00632911	0
CK2ßtes-Y	438	A	A	C	A	A	S	79	1	394	1	171	1	458	0	257	0	248	0	0.0125	0.00253165	0.00581395	0	0	0	0.42764	0.00606233	0
CK2ßtes-Y	439	A	A	G	M	V	N	79	1	393	4	170	2	458	0	257	0	250	0	0.0125	0.0100756	0.0116279	0	0	0	0.0595948	0.00838081	0
CK2ßtes-Y	440	T	T	C	M	T	N	78	1	387	9	168	3	442	16	254	3	247	3	0.0126582	0.0227273	0.0175439	0.0349345	0.0116732	0.012	0.867101	-0.00134513	0
CK2ßtes-Y	441	G	G	T	M	I	N	78	1	392	2	170	0	455	0	272	1	251	0	0.0126582	0.00507614	0	0	0.003663	0	0.269019	0.00795143	0
CK2ßtes-Y	442	T	T	G	F	V	N	78	1	396	2	174	0	463	0	274	0	261	0	0.0126582	0.00502513	0	0	0	0	0.259418	0.00884168	0
CK2ßtes-Y	444	C	C	A	F	L	N	78	2	399	3	171	2	461	5	282	5	272	3	0.025	0.00746269	0.0115607	0.0107296	0.0174216	0.0109091	0.753744	0.00357609	0
CK2ßtes-Y	447	G	G	C	G	G	S	77	2	381	21	162	8	444	25	254	16	243	22	0.0253165	0.0522388	0.0470588	0.0533049	0.0592593	0.0830189	0.312953	-0.0218828	0
CK2ßtes-Y	448	A	A	G	T	A	N	79	2	383	16	159	8	440	22	247	13	243	10	0.0246914	0.0401003	0.0479042	0.047619	0.05	0.0395257	0.304464	-0.0138664	0
CK2ßtes-Y	450	C	C	G	T	T	S	80	1	400	3	169	1	455	3	258	2	250	8	0.0123457	0.00744417	0.00588235	0.00655022	0.00769231	0.0310078	0.683934	-0.00288823	0
CK2ßtes-Y	451	A	A	G	S	G	N	78	3	394	10	171	0	465	0	251	0	256	0	0.037037	0.0247525	0	0	0	0	0.124939	0.0308948	0
CK2ßtes-Y	453	C	C	G	S	R	N	79	1	405	0	175	0	473	1	256	0	266	0	0.0125	0	0	0.0021097	0	0	0.527423	0.00572257	0
CK2ßtes-Y	454	T	T	C	F	L	N	80	1	400	2	175	0	477	1	253	0	266	0	0.0123457	0.00497512	0	0.00209205	0	0	0.265344	0.00813739	0
CK2ßtes-Y	456	C	C	G	F	L	N	73	7	399	7	175	3	473	7	257	4	265	3	0.0875	0.0172414	0.0168539	0.0145833	0.0153257	0.011194	0.475872	0.0378814	0
CK2ßtes-Y	459	G	G	A	S	S	S	79	1	406	6	185	0	518	0	269	0	279	0	0.0125	0.0145631	0	0	0	0	0.0484379	0.0135316	0
CK2ßtes-Y	464	A	A	G	N	S	N	79	1	357	5	178	0	465	7	231	5	245	1	0.0125	0.0138122	0	0.0148305	0.0211864	0.00406504	0.566765	0.00313558	0
CK2ßtes-Y	471	C	C	A	F	L	N	50	30	156	206	114	80	228	281	99	134	106	132	0.375	0.569061	0.412371	0.552063	0.575107	0.554622	0.69063	-0.0515104	0
CK2ßtes-Y	473	C	C	A	A	E	N	78	1	366	3	200	0	529	0	241	1	241	0	0.0126582	0.00813008	0	0	0.00413223	0	0.103753	0.0093611	0
CK2ßtes-Y	475	C	C	A	Q	K	N	79	1	361	2	209	0	548	0	247	0	252	0	0.0125	0.00550964	0	0	0	0	0.235705	0.00900482	0
CK2ßtes-Y	476	A	A	G	Q	R	N	79	1	351	11	200	0	547	5	245	6	246	2	0.0125	0.0303867	0	0.00905797	0.0239044	0.00806452	0.407595	0.0111867	0
CK2ßtes-Y	478	C	C	T	R	W	N	50	30	208	211	127	80	278	295	145	144	148	133	0.375	0.50358	0.386473	0.514834	0.49827	0.47331	0.734518	-0.0289318	0
CK2ßtes-Y	479	G	G	A	R	Q	N	79	1	421	7	208	0	578	6	286	6	280	1	0.0125	0.0163551	0	0.010274	0.0205479	0.00355872	0.303737	0.00583241	0
CK2ßtes-Y	482	C	C	A	P	Q	N	81	1	439	5	235	3	620	10	291	2	279	7	0.0121951	0.0112613	0.012605	0.015873	0.00682594	0.0244755	0.448591	-0.00321669	0
CK2ßtes-Y	486	C	C	T	N	N	S	80	1	423	9	228	4	632	10	277	5	260	5	0.0123457	0.0208333	0.0172414	0.0155763	0.0177305	0.0188679	0.886825	-0.000764525	0
CK2ßtes-Y	487	T	T	C	L	L	S	74	1	420	4	227	3	632	10	276	1	258	6	0.0133333	0.00943396	0.0130435	0.0155763	0.00361011	0.0227273	0.621579	-0.00235565	0
CK2ßtes-Y	489	G	G	T	L	F	N	73	1	408	8	233	3	636	12	275	1	260	6	0.0135135	0.0192308	0.0127119	0.0185185	0.00362319	0.0225564	0.707776	0.00201965	0
CK2ßtes-Y	494	C	C	T	P	L	N	81	1	442	2	231	0	637	0	249	0	229	0	0.0121951	0.0045045	0	0	0	0	0.274748	0.00834981	0
CK2ßtes-Y	500	C	C	A	P	Q	N	81	1	439	9	223	1	617	10	220	6	207	1	0.0121951	0.0200893	0.00446429	0.015949	0.0265487	0.00480769	0.653637	0.0031998	0
CK2ßtes-Y	501	G	G	A	P	P	S	80	2	438	3	224	0	627	1	222	0	206	0	0.0243902	0.00680272	0	0.00159236	0	0	0.333455	0.0151984	0
CK2ßtes-Y	502	C	C	A	P	T	N	80	2	445	0	224	0	625	0	219	0	206	0	0.0243902	0	0	0	0	0	0.5	0.0121951	0
CK2ßtes-Y	504	C	C	A	P	P	S	53	29	243	199	139	79	309	307	106	103	98	101	0.353659	0.450226	0.362385	0.498377	0.492823	0.507538	0.392983	-0.0633383	0
CK2ßtes-Y	506	T	T	A	L	Q	N	80	2	426	12	215	2	610	1	200	6	195	3	0.0243902	0.0273973	0.00921659	0.00163666	0.0291262	0.0151515	0.127014	0.012111	0
CK2ßtes-Y	507	G	G	A	L	L	S	81	1	441	5	217	0	612	0	207	0	195	0	0.0121951	0.0112108	0	0	0	0	0.026758	0.0117029	0
CK2ßtes-Y	509	A	A	T	D	V	N	72	9	430	10	205	3	592	10	189	1	177	4	0.111111	0.0227273	0.0144231	0.0166113	0.00526316	0.0220994	0.445615	0.0523199	0
CK2ßtes-Y	510	C	C	G	D	E	N	62	20	285	154	148	16	466	47	143	34	133	34	0.243902	0.350797	0.097561	0.0916179	0.19209	0.203593	0.156552	0.151134	0
CK2ßtes-Y	514	C	C	T	P	S	N	82	1	427	12	151	0	482	2	143	1	138	0	0.0120482	0.0273349	0	0.00413223	0.00694444	0	0.257479	0.0169224	0
CK2ßtes-Y	515	C	C	A	P	H	N	47	24	258	164	122	9	406	13	105	18	101	8	0.338028	0.388626	0.0687023	0.0310263	0.146341	0.0733945	0.00468381	0.283461	1
CK2ßtes-Y	517	C	C	A	R	R	S	80	1	445	0	129	0	404	0	103	0	96	0	0.0123457	0	0	0	0	0	0.5	0.00617284	0
CK2ßtes-Y	518	G	G	A	R	Q	N	82	1	444	0	73	0	78	0	48	0	35	0	0.0120482	0	0	0	0	0	0.5	0.0060241	0
CK2ßtes-Y	520	T	T	A	STOP	K	N	81	2	435	4	16	0	27	0	37	0	22	0	0.0240964	0.00911162	0	0	0	0	0.269853	0.016604	0
CK2ßtes-Y	529	C	C	A	UTR	UTR	UTR	80	2	435	8	13	2	25	0	38	1	21	0	0.0243902	0.0180587	0.133333	0	0.025641	0	0.601928	-0.0185191	0
CK2ßtes-Y	530	T	T	G	UTR	UTR	UTR	55	27	229	205	10	4	8	17	21	18	9	11	0.329268	0.47235	0.285714	0.68	0.461538	0.55	0.448334	-0.0935039	0
CK2ßtes-Y	531	C	C	A	UTR	UTR	UTR	61	19	297	129	11	4	21	4	25	14	17	4	0.2375	0.302817	0.266667	0.16	0.358974	0.190476	0.661435	0.0261291	0
CK2ßtes-Y	532	C	C	T	UTR	UTR	UTR	61	20	305	138	12	4	21	5	25	14	18	5	0.246914	0.311512	0.25	0.192308	0.358974	0.217391	0.646673	0.0245447	0
CK2ßtes-Y	533	G	G	T	UTR	UTR	UTR	81	1	452	5	16	0	26	0	38	0	23	0	0.0121951	0.0109409	0	0	0	0	0.0344774	0.011568	0
CK2ßtes-Y	534	A	A	T	UTR	UTR	UTR	81	1	453	8	16	0	26	0	38	0	19	0	0.0121951	0.0173536	0	0	0	0	0.110029	0.0147744	0
CK2ßtes-Y	535	A	A	T	UTR	UTR	UTR	81	1	450	7	16	0	26	0	39	0	20	0	0.0121951	0.0153173	0	0	0	0	0.0719372	0.0137562	0
CK2ßtes-Y	536	T	T	A	UTR	UTR	UTR	81	1	453	1	16	0	26	0	40	0	20	0	0.0121951	0.00220264	0	0	0	0	0.386242	0.00719888	0
CK2ßtes-Y	538	T	T	A	UTR	UTR	UTR	81	1	450	5	16	0	26	0	40	0	21	0	0.0121951	0.010989	0	0	0	0	0.0330891	0.0115921	0
CK2ßtes-Y	540	G	G	A	UTR	UTR	UTR	81	1	447	6	16	0	26	0	40	0	21	0	0.0121951	0.013245	0	0	0	0	0.0262583	0.0127201	0
CK2ßtes-Y	542	C	C	T	UTR	UTR	UTR	81	1	448	6	19	0	24	0	37	0	21	0	0.0121951	0.0132159	0	0	0	0	0.0255587	0.0127055	0
CK2ßtes-Y	545	G	G	T	UTR	UTR	UTR	30	52	202	236	9	12	5	19	13	23	6	15	0.634146	0.538813	0.571429	0.791667	0.638889	0.714286	0.262963	-0.0925879	0
CK2ßtes-Y	550	T	T	C	UTR	UTR	UTR	81	1	427	5	19	0	24	0	34	1	22	0	0.0121951	0.0115741	0	0	0.0285714	0	0.554437	0.00474174	0
CK2ßtes-Y	551	T	T	G	UTR	UTR	UTR	80	2	438	4	19	0	24	0	35	0	23	0	0.0243902	0.00904977	0	0	0	0	0.273812	0.01672	0
CK2ßtes-Y	552	T	T	A	UTR	UTR	UTR	71	11	423	17	17	2	23	1	33	1	21	2	0.134146	0.0386364	0.105263	0.0416667	0.0294118	0.0869565	0.743378	0.0205668	0
CK2ßtes-Y	553	T	T	C	UTR	UTR	UTR	80	2	443	2	19	0	24	0	35	0	23	0	0.0243902	0.00449438	0	0	0	0	0.383992	0.0144423	0
CK2ßtes-Y	556	A	A	C	UTR	UTR	UTR	81	1	434	3	17	0	24	0	31	1	20	0	0.0121951	0.00686499	0	0	0.03125	0	0.846425	0.00171756	0
CK2ßtes-Y	557	C	C	A	UTR	UTR	UTR	72	9	425	16	15	2	23	1	31	1	19	1	0.111111	0.0362812	0.117647	0.0416667	0.03125	0.05	0.785465	0.0135552	0
CK2ßtes-Y	560	A	A	C	UTR	UTR	UTR	80	1	424	8	18	0	24	0	30	0	21	0	0.0123457	0.0185185	0	0	0	0	0.125666	0.0154321	0
CK2ßtes-Y	561	A	A	G	UTR	UTR	UTR	80	1	428	1	18	0	24	0	30	0	22	0	0.0123457	0.002331	0	0	0	0	0.381198	0.00733834	0
CK2ßtes-Y	562	A	A	T	UTR	UTR	UTR	78	5	421	20	23	1	32	2	28	1	22	0	0.060241	0.0453515	0.0416667	0.0588235	0.0344828	0	0.257075	0.019053	0
CK2ßtes-Y	566	C	C	T	UTR	UTR	UTR	79	4	439	9	28	1	51	0	30	1	24	0	0.0481928	0.0200893	0.0344828	0	0.0322581	0	0.412753	0.0174558	0
CK2ßtes-Y	572	T	T	C	UTR	UTR	UTR	83	1	437	5	32	0	51	0	32	0	23	0	0.0119048	0.0113122	0	0	0	0	0.0162443	0.0116085	0
CK2ßtes-Y	573	T	T	A	UTR	UTR	UTR	83	1	438	4	32	0	51	0	33	0	23	0	0.0119048	0.00904977	0	0	0	0	0.0862066	0.0104773	0
CK2ßtes-Y	577	A	A	T	UTR	UTR	UTR	83	1	447	6	31	1	54	0	31	1	23	0	0.0119048	0.013245	0.03125	0	0.03125	0	0.75797	-0.0030501	0
CK2ßtes-Y	579	T	T	A	UTR	UTR	UTR	83	1	434	11	147	1	276	1	77	0	68	0	0.0119048	0.0247191	0.00675676	0.00361011	0	0	0.229476	0.0157202	0
CK2ßtes-Y	580	C	C	T	UTR	UTR	UTR	83	1	443	5	138	12	258	30	73	3	67	3	0.0119048	0.0111607	0.08	0.104167	0.0394737	0.0428571	0.0380548	-0.0550916	1
CK2ßtes-Y	581	T	T	A	UTR	UTR	UTR	54	30	251	193	130	21	256	32	61	13	49	19	0.357143	0.434685	0.139073	0.111111	0.175676	0.279412	0.0289023	0.219596	1
CK2ßtes-Y	587	G	G	T	UTR	UTR	UTR	80	3	452	3	250	3	653	0	145	1	132	0	0.0361446	0.00659341	0.0118577	0	0.00684932	0	0.45666	0.0166922	0
CK2ßtes-Y	588	C	C	A	UTR	UTR	UTR	82	1	445	6	252	0	652	1	146	0	131	1	0.0120482	0.0133038	0	0.00153139	0	0.00757576	0.00736512	0.0103992	0
CK2ßtes-Y	589	T	T	A	UTR	UTR	UTR	82	1	442	1	253	0	653	0	146	0	131	0	0.0120482	0.00225734	0	0	0	0	0.382091	0.00715276	0
CK2ßtes-Y	593	G	G	T	UTR	UTR	UTR	63	18	315	139	197	63	542	123	110	48	110	30	0.222222	0.306167	0.242308	0.184962	0.303797	0.214286	0.633239	0.0278565	0
CK2ßtes-Y	595	T	T	A	UTR	UTR	UTR	82	1	448	1	263	0	669	0	161	0	143	1	0.0120482	0.00222717	0	0	0	0.00694444	0.458537	0.00540157	0
CK2ßtes-Y	598	T	T	G	UTR	UTR	UTR	79	4	448	15	220	44	584	94	158	10	139	11	0.0481928	0.0323974	0.166667	0.138643	0.0595238	0.0733333	0.0703009	-0.0692466	0
CK2ßtes-Y	601	C	C	T	UTR	UTR	UTR	54	28	269	188	197	77	384	311	117	73	88	74	0.341463	0.411379	0.281022	0.447482	0.384211	0.45679	0.782631	-0.0159552	0
CK2ßtes-Y	603	A	A	G	UTR	UTR	UTR	81	2	454	5	278	0	698	0	202	0	173	0	0.0240964	0.0108932	0	0	0	0	0.229708	0.0174948	0
CK2ßtes-Y	604	G	G	T	UTR	UTR	UTR	74	9	451	16	273	8	695	6	199	5	171	2	0.108434	0.0342612	0.0284698	0.0085592	0.0245098	0.0115607	0.385142	0.0530726	0
CK2ßtes-Y	606	C	C	G	UTR	UTR	UTR	82	1	471	0	286	0	709	0	203	0	174	0	0.0120482	0	0	0	0	0	0.5	0.0060241	0
CK2ßtes-Y	607	G	G	C	UTR	UTR	UTR	76	7	454	16	284	6	704	5	197	5	173	2	0.0843373	0.0340426	0.0206897	0.00705219	0.0247525	0.0114286	0.329754	0.0432092	0
CK2ßtes-Y	610	C	C	T	UTR	UTR	UTR	81	1	452	5	287	13	686	31	196	5	170	1	0.0121951	0.0109409	0.0433333	0.0432357	0.0248756	0.00584795	0.141239	-0.0177551	0
CK2ßtes-Y	611	T	T	G	UTR	UTR	UTR	75	7	434	20	293	6	710	5	195	5	167	2	0.0853659	0.0440529	0.0200669	0.00699301	0.025	0.0118343	0.244954	0.0487358	0
CK2ßtes-Y	614	A	A	T	UTR	UTR	UTR	81	1	470	0	299	0	720	0	208	0	171	0	0.0121951	0	0	0	0	0	0.5	0.00609756	0
CK2ßtes-Y	616	G	G	A	UTR	UTR	UTR	80	2	454	22	306	8	691	33	204	6	162	10	0.0243902	0.0462185	0.0254777	0.0455801	0.0285714	0.0581395	0.784786	-0.00413783	0
CK2ßtes-Y	620	C	C	G	UTR	UTR	UTR	80	2	468	7	318	2	705	0	207	0	169	1	0.0243902	0.0147368	0.00625	0	0	0.00588235	0.147164	0.0165305	0
CK2ßtes-Y	627	C	C	T	UTR	UTR	UTR	81	1	479	7	293	14	649	32	210	6	170	1	0.0121951	0.0144033	0.0456026	0.0469897	0.0277778	0.00584795	0.153568	-0.0182553	0
CK2ßtes-Y	629	C	C	G	UTR	UTR	UTR	80	2	470	16	303	11	658	18	225	9	181	6	0.0243902	0.0329218	0.0350318	0.0266272	0.0384615	0.0320856	0.479805	-0.00439551	0
CK2ßtes-Y	630	C	C	A	UTR	UTR	UTR	81	1	483	9	314	0	674	0	233	0	186	0	0.0121951	0.0182927	0	0	0	0	0.125666	0.0152439	0
CK2ßtes-Y	634	G	G	T	UTR	UTR	UTR	75	7	475	11	294	4	593	7	217	4	176	4	0.0853659	0.0226337	0.0134228	0.0116667	0.0180995	0.0222222	0.441379	0.037647	0
CK2ßtes-Y	637	C	C	T	UTR	UTR	UTR	81	1	478	7	306	0	596	1	223	0	179	0	0.0121951	0.014433	0	0.00167504	0	0	0.0318732	0.0128953	0
CK2ßtes-Y	640	G	G	T	UTR	UTR	UTR	80	1	475	11	296	6	565	12	208	2	170	4	0.0123457	0.0226337	0.0198675	0.0207972	0.00952381	0.0229885	0.906559	-0.000804561	0
CK2ßtes-Y	650	A	A	T	UTR	UTR	UTR	80	2	462	12	276	13	496	21	174	8	147	4	0.0243902	0.0253165	0.0449827	0.040619	0.043956	0.0264901	0.0445241	-0.0141586	0
CK2ßtes-Y	652	C	C	T	UTR	UTR	UTR	80	2	457	12	276	13	497	21	171	8	144	4	0.0243902	0.0255864	0.0449827	0.0405405	0.0446927	0.027027	0.0412338	-0.0143225	0
CK2ßtes-Y	653	G	G	T	UTR	UTR	UTR	75	7	446	11	286	6	497	5	172	3	138	3	0.0853659	0.02407	0.0205479	0.00996016	0.0171429	0.0212766	0.435253	0.037486	0
CK2ßtes-Y	656	T	T	A	UTR	UTR	UTR	81	1	446	6	273	5	474	12	164	4	133	5	0.0121951	0.0132743	0.0179856	0.0246914	0.0238095	0.0362319	0.0414199	-0.0129449	0
CK2ßtes-Y	657	C	C	T	UTR	UTR	UTR	80	2	437	18	264	12	471	10	159	6	136	2	0.0243902	0.0395604	0.0434783	0.02079	0.0363636	0.0144928	0.775797	0.00319417	0
CK2ßtes-Y	660	C	C	T	UTR	UTR	UTR	79	3	436	11	228	44	413	59	151	11	128	9	0.0365854	0.0246085	0.161765	0.125	0.0679012	0.0656934	0.0461163	-0.0744929	1
CK2ßtes-Y	664	C	C	T	UTR	UTR	UTR	72	8	404	3	242	3	412	0	136	1	124	0	0.1	0.00737101	0.0122449	0	0.00729927	0	0.482886	0.0487995	0
CK2ßtes-Y	665	A	A	C	UTR	UTR	UTR	79	2	414	1	258	0	430	0	145	0	129	0	0.0246914	0.00240964	0	0	0	0	0.438068	0.0135505	0
CK2ßtes-Y	666	A	A	C	UTR	UTR	UTR	79	2	397	13	242	8	407	11	136	8	121	6	0.0246914	0.0317073	0.032	0.0263158	0.0555556	0.0472441	0.187671	-0.0120795	0
Lhk-1	16	T	T	G	I	S	N	52	11	69	12	587	29	745	150	107	30	98	21	0.174603	0.148148	0.0470779	0.167598	0.218978	0.176471	0.833565	0.00884457	0
Lhk-1	17	C	C	G	I	M	N	52	11	72	12	620	29	800	150	109	30	102	20	0.174603	0.142857	0.0446841	0.157895	0.215827	0.163934	0.756056	0.013145	0
Lhk-1	39	T	T	A	F	I	N	25	38	80	60	120	983	400	1214	128	279	132	253	0.603175	0.428571	0.891206	0.752169	0.685504	0.657143	0.167953	-0.230632	0
Lhk-1	52	G	G	C	W	S	N	62	1	168	2	1290	1	1800	2	534	0	504	2	0.015873	0.0117647	0.000774593	0.00110988	0	0.00395257	0.0667424	0.0123596	0
Lhk-1	63	G	G	A	D	N	N	56	4	189	26	1422	58	1926	111	650	39	606	40	0.0666667	0.12093	0.0391892	0.0544919	0.0566038	0.0619195	0.367876	0.0407474	0
Lhk-1	65	C	C	T	D	D	S	61	2	224	2	1492	16	2040	46	681	33	642	22	0.031746	0.00884956	0.0106101	0.0220518	0.0462185	0.0331325	0.632788	-0.00770542	0
Lhk-1	68	G	G	T	L	F	N	60	3	218	19	1494	40	2054	72	716	18	672	13	0.047619	0.0801688	0.0260756	0.0338664	0.0245232	0.0189781	0.247855	0.0380331	0
Lhk-1	99	C	C	G	L	V	N	59	2	320	15	1794	0	2494	0	915	0	790	0	0.0327869	0.0447761	0	0	0	0	0.0976323	0.0387815	0
Lhk-1	101	G	G	C	L	L	S	61	2	328	15	1852	0	2554	0	939	0	812	0	0.031746	0.0437318	0	0	0	0	0.100257	0.0377389	0
Lhk-1	134	G	G	T	E	D	N	61	2	375	8	1787	75	2573	131	861	32	714	22	0.031746	0.0208877	0.0402793	0.0484467	0.0358343	0.0298913	0.20048	-0.012296	0
Lhk-1	148	A	A	C	K	T	N	61	2	369	20	1872	0	2840	0	937	0	781	0	0.031746	0.0514139	0	0	0	0	0.147848	0.04158	0
Lhk-1	157	G	G	C	R	P	N	56	2	375	14	1533	226	2504	285	820	72	660	64	0.0344828	0.0359897	0.128482	0.102187	0.0807175	0.0883978	0.00840169	-0.0647099	1
Lhk-1	161	G	G	C	E	D	N	50	8	368	24	1579	217	2509	364	793	83	653	77	0.137931	0.0612245	0.120824	0.126697	0.0947489	0.105479	0.80199	-0.0123595	0
Lhk-1	168	C	C	T	P	S	N	25	33	253	140	159	1608	605	2242	319	620	257	520	0.568966	0.356234	0.910017	0.787496	0.660277	0.669241	0.162403	-0.294158	0
Lhk-1	172	C	C	A	S	STOP	N	25	33	250	143	171	1694	636	2341	335	625	270	516	0.568966	0.363868	0.908311	0.786362	0.651042	0.656489	0.156945	-0.284134	0
Lhk-1	173	G	G	A	S	S	S	57	1	392	11	1881	20	2960	73	930	49	764	28	0.0172414	0.0272953	0.0105208	0.0240686	0.0500511	0.0353535	0.473699	-0.00773016	0
Lhk-1	194	C	C	T	T	T	S	56	1	412	7	2264	0	3294	0	911	1	807	0	0.0175439	0.0167064	0	0	0.00109649	0	0.00109878	0.016851	0
Lhk-1	208	A	A	G	D	G	N	56	1	388	9	2529	1	3450	1	949	0	864	1	0.0175439	0.02267	0.000395257	0.000289771	0	0.00115607	0.0801704	0.0196467	0
Lhk-1	212	C	C	T	D	D	S	25	32	276	140	231	2352	721	2758	360	580	325	534	0.561404	0.336538	0.910569	0.792757	0.617021	0.621653	0.173418	-0.286529	0
Lhk-1	223	C	C	T	T	I	N	56	1	420	4	2769	16	3553	11	886	2	824	4	0.0175439	0.00943396	0.00574506	0.00308642	0.00225225	0.00483092	0.246257	0.00951025	0
Lhk-1	228	G	G	C	V	L	N	45	13	244	185	2688	99	3289	216	784	99	740	85	0.224138	0.431235	0.0355221	0.0616262	0.112118	0.10303	0.242108	0.249613	0
Lhk-1	235	G	G	C	G	A	N	56	1	432	5	2745	74	3418	80	823	14	779	14	0.0175439	0.0114416	0.0262504	0.0228702	0.0167264	0.0176545	0.22451	-0.00638263	0
Lhk-1	247	G	G	T	C	F	N	25	33	297	153	219	2353	700	2474	344	415	276	404	0.568966	0.34	0.914852	0.779458	0.546772	0.594118	0.205632	-0.254317	0
Lhk-1	258	G	G	C	E	Q	N	57	1	481	1	2571	52	3211	48	978	16	862	13	0.0172414	0.00207469	0.0198246	0.0147284	0.0160966	0.0148571	0.536635	-0.00671866	0
Lhk-1	282	A	A	G	K	E	N	56	2	494	30	2578	11	3152	16	980	3	876	6	0.0344828	0.0572519	0.00424874	0.00505051	0.00305188	0.00680272	0.170635	0.0410789	0
Lhk-1	299	C	C	T	S	S	S	44	12	335	183	2389	149	2776	269	842	104	767	103	0.214286	0.353282	0.0587076	0.0883415	0.109937	0.118391	0.212901	0.18994	0
Lhk-1	316	C	C	T	P	L	N	56	1	548	18	2324	2	2837	28	918	11	828	5	0.0175439	0.0318021	0.000859845	0.00977312	0.0118407	0.0060024	0.217816	0.017554	0
Lhk-1	333	G	G	T	A	S	N	53	2	556	27	1430	0	1973	1	546	0	513	0	0.0363636	0.0463122	0	0.000506586	0	0	0.0763044	0.0412113	0
Lhk-1	347	G	G	A	Q	Q	S	54	1	550	15	883	3	1257	23	448	8	409	2	0.0181818	0.0265487	0.003386	0.0179687	0.0175439	0.00486618	0.146807	0.011424	0
Lhk-1	363	G	G	C	D	H	N	54	1	537	9	775	0	1173	0	482	0	418	0	0.0181818	0.0164835	0	0	0	0	0.0311639	0.0173327	0
Lhk-1	402	A	A	T	I	L	N	23	1	354	20	174	10	637	47	287	16	301	16	0.0416667	0.0534759	0.0543478	0.0687135	0.0528053	0.0504732	0.334596	-0.00901363	0
Lhk-1	425	G	G	A	L	L	S	20	4	328	59	131	4	569	16	261	7	265	3	0.166667	0.152455	0.0296296	0.0273504	0.0261194	0.011194	0.00639658	0.135987	1
Lhk-1	432	G	G	A	D	N	N	12	12	157	216	78	58	374	216	201	76	178	85	0.5	0.579088	0.426471	0.366102	0.274368	0.323194	0.0471895	0.192011	1
Lhk-1	469	C	C	T	T	I	N	12	12	165	223	102	60	467	258	272	104	241	105	0.5	0.574742	0.37037	0.355862	0.276596	0.303468	0.0518798	0.210797	0
Lhk-1	489	C	C	G	P	A	N	15	9	269	103	84	111	332	486	132	266	122	231	0.375	0.276882	0.569231	0.594132	0.668342	0.654391	0.0584724	-0.295583	0
Lhk-1	497	G	G	A	S	S	S	13	11	240	128	83	115	327	491	132	260	116	224	0.458333	0.347826	0.580808	0.600244	0.663265	0.658824	0.119379	-0.222706	0
Lhk-1	499	A	A	T	N	I	N	15	9	268	103	83	115	327	492	132	260	119	224	0.375	0.277628	0.580808	0.600733	0.663265	0.653061	0.066456	-0.298153	0
Lhk-1	501	C	C	T	P	S	N	13	11	241	128	85	115	328	491	131	260	122	223	0.458333	0.346883	0.575	0.599512	0.664962	0.646377	0.123779	-0.218854	0
Lhk-1	511	C	C	T	P	L	N	13	11	234	130	83	111	311	485	106	222	108	207	0.458333	0.357143	0.572165	0.609296	0.676829	0.657143	0.0947428	-0.22112	0
Lhk-1	517	C	C	T	P	L	N	23	1	354	2	208	0	778	0	320	1	318	0	0.0416667	0.00561798	0	0	0.00311526	0	0.424704	0.0228635	0
Lhk-1	519	C	C	T	P	S	N	22	2	322	31	209	1	779	0	311	0	308	0	0.0833333	0.0878187	0.0047619	0	0	0	0.00290355	0.0843855	1
Lhk-1	523	C	C	T	P	L	N	12	12	153	192	124	81	519	268	233	81	217	92	0.5	0.556522	0.395122	0.340534	0.257962	0.297735	0.0137307	0.205423	1
Lhk-1	530	G	G	A	P	P	S	23	1	362	13	201	3	759	23	335	11	337	6	0.0416667	0.0346667	0.0147059	0.0294118	0.0317919	0.0174927	0.0620448	0.0148161	0
Lhk-1	531	C	C	A	Q	K	N	22	2	348	28	201	3	763	23	340	11	345	6	0.0833333	0.0744681	0.0147059	0.0292621	0.031339	0.017094	0.00342725	0.0558005	1
Lhk-1	534	G	G	A	A	T	N	22	2	360	24	197	9	752	57	343	20	336	24	0.0833333	0.0625	0.0436893	0.0704574	0.0550964	0.0666667	0.382643	0.0139392	0
Lhk-1	544	A	A	C	K	T	N	23	1	367	15	203	3	746	27	355	11	336	7	0.0416667	0.039267	0.0145631	0.0349288	0.0300546	0.0204082	0.0399699	0.0154782	0
Lhk-1	547	C	C	A	A	D	N	23	1	375	14	200	3	756	28	354	12	329	6	0.0416667	0.0359897	0.0147783	0.0357143	0.0327869	0.0179104	0.0859589	0.0135307	0
Lhk-1	553	A	A	G	Q	R	N	23	1	368	15	206	4	751	27	343	12	329	6	0.0416667	0.0391645	0.0190476	0.0347044	0.0338028	0.0179104	0.0503253	0.0140493	0
Lhk-1	567	G	G	A	E	K	N	23	1	390	9	196	16	727	44	340	3	323	3	0.0416667	0.0225564	0.0754717	0.0570687	0.00874636	0.00920245	0.791171	-0.00551078	0
Lhk-1	584	C	C	A	N	K	N	15	9	289	111	106	121	287	468	112	252	113	224	0.375	0.2775	0.53304	0.619868	0.692308	0.664688	0.0337924	-0.301226	1
Lhk-1	595	C	C	T	A	V	N	23	1	365	19	230	6	765	28	382	10	332	7	0.0416667	0.0494792	0.0254237	0.035309	0.0255102	0.020649	0.0494485	0.01885	1
Lhk-1	641	C	C	T	A	A	S	23	1	396	19	215	6	696	24	336	5	258	7	0.0416667	0.0457831	0.0271493	0.0333333	0.0146628	0.0264151	0.0143108	0.0183348	1
Lhk-1	660	C	C	A	R	R	S	15	10	283	120	112	125	268	499	115	189	82	178	0.4	0.297767	0.527426	0.650587	0.621711	0.684615	0.049794	-0.272201	1
Lhk-1	666	C	C	G	L	V	N	23	2	386	25	232	6	767	26	327	3	276	4	0.08	0.0608273	0.0252101	0.0327869	0.00909091	0.0142857	0.0625615	0.0500702	0
Lhk-1	682	G	G	C	G	A	N	21	4	372	53	237	6	791	22	329	15	290	7	0.16	0.124706	0.0246914	0.0270603	0.0436047	0.023569	0.0812838	0.112622	0
Lhk-1	693	A	A	G	N	D	N	24	1	392	16	238	8	798	34	353	19	298	19	0.04	0.0392157	0.0325203	0.0408654	0.0510753	0.0599369	0.356861	-0.00649163	0
Lhk-1	705	G	G	A	D	N	N	23	2	395	23	254	5	809	21	345	6	316	4	0.08	0.0550239	0.019305	0.0253012	0.017094	0.0125	0.14582	0.0489619	0
Lhk-1	726	A	A	G	M	V	N	13	12	183	228	125	93	562	245	274	98	238	95	0.48	0.554745	0.426606	0.303594	0.263441	0.285285	0.0337083	0.197641	1
Lhk-1	734	C	C	A	F	L	N	23	2	396	28	216	2	787	20	389	7	326	7	0.08	0.0660377	0.00917431	0.0247831	0.0176768	0.021021	0.0404492	0.0548551	1
Lhk-1	773	C	C	T	S	S	S	23	2	382	25	221	2	836	20	350	6	306	5	0.08	0.0614251	0.00896861	0.0233645	0.0168539	0.0160772	0.0829434	0.0543965	0
Lhk-1	796	A	A	G	E	G	N	21	4	359	38	221	1	869	22	318	6	304	7	0.16	0.0957179	0.0045045	0.0246914	0.0185185	0.022508	0.174501	0.110303	0
Lhk-1	799	A	A	T	D	V	N	24	1	357	40	207	14	837	43	306	14	283	26	0.04	0.100756	0.0633484	0.0488636	0.04375	0.0841424	0.7923	0.0103517	0
Lhk-1	806	G	G	T	L	F	N	13	12	176	215	121	98	570	280	211	90	198	98	0.48	0.549872	0.447489	0.329412	0.299003	0.331081	0.0466689	0.16319	1
Lhk-1	807	G	G	T	A	S	N	24	1	369	24	215	3	841	9	306	1	294	5	0.04	0.0610687	0.0137615	0.0105882	0.00325733	0.0167224	0.145146	0.039452	0
Lhk-1	839	G	G	A	P	P	S	23	2	379	19	199	17	725	82	287	29	271	30	0.08	0.0477387	0.0787037	0.101611	0.0917722	0.0996678	0.301707	-0.0290693	0
Lhk-1	914	C	C	G	G	G	S	15	9	313	82	82	96	247	379	85	169	86	157	0.375	0.207595	0.539326	0.605431	0.665354	0.646091	0.132353	-0.322753	0
Lhk-1	934	T	T	A	M	K	N	19	5	319	79	167	24	558	72	208	29	198	22	0.208333	0.198492	0.125654	0.114286	0.122363	0.1	0.000701218	0.0878371	1
Lhk-1	952	A	A	C	K	T	N	23	1	369	2	137	0	468	1	173	0	162	0	0.0416667	0.00539084	0	0.0021322	0	0	0.425024	0.0229957	0
Lhk-1	957	G	G	T	E	STOP	N	23	1	373	2	146	0	483	0	204	0	192	0	0.0416667	0.00533333	0	0	0	0	0.418953	0.0235	0
Lhk-1	958	A	A	T	E	V	N	23	1	356	2	145	0	477	0	202	0	192	0	0.0416667	0.00558659	0	0	0	0	0.415149	0.0236266	0
Lhk-1	959	G	G	C	E	D	N	23	1	368	2	141	0	483	0	209	0	193	1	0.0416667	0.00540541	0	0	0	0.00515464	0.434552	0.0222474	0
Lhk-1	961	G	G	C	W	S	N	23	1	369	0	141	0	460	0	205	0	198	0	0.0416667	0	0	0	0	0	0.5	0.0208333	0
Lhk-1	987	G	G	T	A	S	N	23	1	361	15	164	1	547	0	234	0	227	0	0.0416667	0.0398936	0.00606061	0	0	0	2.36808e-05	0.039265	1
Lhk-1	1025	C	C	T	N	N	S	17	7	289	82	91	90	263	360	134	199	111	209	0.291667	0.221024	0.497238	0.577849	0.597598	0.653125	0.00871663	-0.325107	1
Lhk-1	1033	C	C	T	A	V	N	19	6	301	74	162	9	578	28	293	15	302	10	0.24	0.197333	0.0526316	0.0462046	0.0487013	0.0320513	0.0672327	0.173769	0
Lhk-1	1038	G	G	A	A	T	N	21	4	315	54	143	10	547	27	280	17	293	11	0.16	0.146341	0.0653595	0.0470383	0.0572391	0.0361842	0.00232963	0.101715	1
Lhk-1	1043	G	G	A	A	A	S	24	1	345	27	144	13	549	34	265	16	279	14	0.04	0.0725806	0.0828025	0.058319	0.0569395	0.0477816	0.808947	-0.00517034	0
Lhk-1	1044	G	G	A	E	K	N	24	1	366	9	158	1	587	0	277	0	291	0	0.04	0.024	0.00628931	0	0	0	0.152333	0.0304277	0
Lhk-1	1088	T	T	C	UTR	UTR	UTR	25	2	385	20	165	19	640	67	275	29	276	28	0.0740741	0.0493827	0.103261	0.0947666	0.0953947	0.0921053	0.207093	-0.0346535	0
Lhk-1	1090	G	G	A	UTR	UTR	UTR	20	7	318	94	62	118	244	454	92	206	120	178	0.259259	0.228155	0.655556	0.65043	0.691275	0.597315	0.000163491	-0.404937	1
Lhk-1	1107	A	A	T	UTR	UTR	UTR	15	12	193	196	156	59	572	208	268	77	233	107	0.444444	0.503856	0.274419	0.266667	0.223188	0.314706	0.0334458	0.204405	1
Lhk-1	1134	G	G	A	UTR	UTR	UTR	21	6	320	70	289	19	870	49	395	14	390	20	0.222222	0.179487	0.0616883	0.0533188	0.0342298	0.0487805	0.0718675	0.15135	0
Lhk-1	1137	G	G	C	UTR	UTR	UTR	24	3	346	34	249	56	713	187	312	93	312	91	0.111111	0.0894737	0.183607	0.207778	0.22963	0.225806	0.00566864	-0.111413	1
Lhk-1	1143	G	G	C	UTR	UTR	UTR	21	6	300	71	302	23	868	54	393	20	387	25	0.222222	0.191375	0.0707692	0.0585683	0.0484262	0.0606796	0.0484943	0.147188	1
Lhk-1	1149	A	A	C	UTR	UTR	UTR	16	10	233	136	294	28	839	82	384	36	379	35	0.384615	0.368564	0.0869565	0.0890337	0.0857143	0.0845411	0.0160952	0.290028	1
Lhk-1	1164	G	G	A	UTR	UTR	UTR	21	6	300	70	319	22	918	57	425	25	381	27	0.222222	0.189189	0.0645161	0.0584615	0.0555556	0.0661765	0.0669131	0.144528	0
Lhk-1	1171	G	G	T	UTR	UTR	UTR	25	2	339	20	344	0	986	0	439	0	395	0	0.0740741	0.0557103	0	0	0	0	0.0894841	0.0648922	0
Lhk-1	1204	C	C	T	UTR	UTR	UTR	8	19	90	235	25	327	58	915	32	427	30	357	0.703704	0.723077	0.928977	0.940391	0.930283	0.922481	0.0131318	-0.217143	1
Lhk-1	1222	G	G	A	UTR	UTR	UTR	44	4	354	0	386	0	1039	0	514	0	393	0	0.0833333	0	0	0	0	0	0.5	0.0416667	0
Lhk-1	1241	T	T	C	UTR	UTR	UTR	35	13	344	23	355	7	945	37	446	31	348	19	0.270833	0.0626703	0.019337	0.0376782	0.0649895	0.0517711	0.445048	0.123308	0
Lhk-1	1255	C	C	A	UTR	UTR	UTR	47	1	344	15	374	0	993	0	467	0	347	0	0.0208333	0.0417827	0	0	0	0	0.20554	0.031308	0
Lhk-1	1273	C	C	G	UTR	UTR	UTR	47	1	341	1	343	0	939	1	445	0	332	2	0.0208333	0.00292398	0	0.00106383	0	0.00598802	0.458102	0.0101157	0
Lhk-1	1294	C	C	T	UTR	UTR	UTR	43	5	305	18	310	28	904	52	429	27	344	26	0.104167	0.0557276	0.0828402	0.0543933	0.0592105	0.0702703	0.680764	0.0132685	0
Lhk-1	1301	G	G	C	UTR	UTR	UTR	47	1	319	4	316	7	916	11	444	5	372	2	0.0208333	0.0123839	0.0216718	0.0118662	0.0111359	0.00534759	0.516648	0.00410324	0
Lhk-1	1311	A	A	G	UTR	UTR	UTR	41	7	266	53	153	151	409	496	205	239	166	197	0.145833	0.166144	0.496711	0.548066	0.538288	0.5427	6.00488e-05	-0.375452	1
Lhk-1	1317	G	G	A	UTR	UTR	UTR	47	1	310	3	315	0	931	0	500	2	398	0	0.0208333	0.00958466	0	0	0.00398406	0	0.231143	0.014213	0
Lhk-1	1326	G	G	T	UTR	UTR	UTR	40	7	238	52	153	153	424	514	205	260	174	214	0.148936	0.17931	0.5	0.547974	0.55914	0.551546	0.000724246	-0.375542	1
Lhk-1	1335	T	T	A	UTR	UTR	UTR	32	14	248	18	263	13	811	52	399	29	335	29	0.304348	0.0676692	0.0471014	0.0602549	0.067757	0.0796703	0.489118	0.122313	0
Lhk-1	1341	G	G	C	UTR	UTR	UTR	37	7	164	80	216	66	718	162	347	109	314	79	0.159091	0.327869	0.234043	0.184091	0.239035	0.201018	0.789998	0.0289333	0
Lhk-1	1343	T	T	A	UTR	UTR	UTR	32	14	245	1	270	0	828	0	431	0	369	0	0.304348	0.00406504	0	0	0	0	0.491497	0.154206	0
Lhk-1	1371	C	C	A	UTR	UTR	UTR	42	4	225	31	273	16	936	35	494	12	437	20	0.0869565	0.121094	0.0553633	0.0360453	0.0237154	0.0437637	0.127474	0.0643032	0
Lhk-1	1387	C	C	A	UTR	UTR	UTR	44	2	265	0	270	0	948	0	452	0	439	0	0.0434783	0	0	0	0	0	0.5	0.0217391	0
Lhk-1	1396	C	C	A	UTR	UTR	UTR	45	1	274	1	248	5	918	17	417	7	417	4	0.0217391	0.00363636	0.0197628	0.0181818	0.0165094	0.00950119	0.778177	-0.00330107	0
Lhk-1	1440	C	C	G	UTR	UTR	UTR	37	9	192	54	120	88	366	350	162	102	153	118	0.195652	0.219512	0.423077	0.488827	0.386364	0.435424	0.000750937	-0.225841	1
Lhk-1	1442	T	T	G	UTR	UTR	UTR	37	9	187	55	120	88	367	349	162	102	153	118	0.195652	0.227273	0.423077	0.48743	0.386364	0.435424	0.00143135	-0.221611	1
Lhk-1	1447	G	G	A	UTR	UTR	UTR	45	1	243	2	201	5	690	14	287	4	280	4	0.0217391	0.00816327	0.0242718	0.0198864	0.0137457	0.0140845	0.733473	-0.00304591	0
Lhk-1	1458	G	G	C	UTR	UTR	UTR	44	2	229	2	194	1	652	1	280	3	271	2	0.0434783	0.00865801	0.00512821	0.00153139	0.0106007	0.00732601	0.45565	0.0199216	0
Lhk-1	1469	G	G	T	UTR	UTR	UTR	41	5	181	29	172	9	579	34	261	12	243	14	0.108696	0.138095	0.0497238	0.0554649	0.043956	0.0544747	0.118145	0.0724906	0
Lhk-1	1470	G	G	A	UTR	UTR	UTR	41	5	180	28	169	9	575	34	261	12	238	14	0.108696	0.134615	0.0505618	0.0558292	0.043956	0.0555556	0.103571	0.0701799	0
Lhk-1	1471	A	A	T	UTR	UTR	UTR	44	2	204	6	165	5	589	15	263	9	245	5	0.0434783	0.0285714	0.0294118	0.0248344	0.0330882	0.02	0.418172	0.00919124	0
Lhk-1	1476	G	G	T	UTR	UTR	UTR	42	4	192	18	153	4	549	21	260	9	235	8	0.0869565	0.0857143	0.0254777	0.0368421	0.0334572	0.0329218	9.40644e-05	0.0541607	1
Lhk-1	1493	G	G	T	UTR	UTR	UTR	46	1	186	5	122	4	412	38	211	12	177	9	0.0212766	0.026178	0.031746	0.0844444	0.0538117	0.0483871	0.0646489	-0.03087	0
Lhk-1	1494	G	G	A	UTR	UTR	UTR	43	4	171	14	124	2	431	16	213	7	179	6	0.0851064	0.0756757	0.015873	0.0357942	0.0318182	0.0324324	0.0051488	0.0514116	1
Lhk-1	1502	T	T	A	UTR	UTR	UTR	46	1	155	2	99	10	335	28	152	23	143	16	0.0212766	0.0127389	0.0917431	0.077135	0.131429	0.100629	0.00329718	-0.0832262	1
Lhk-2	5	C	C	T	R	R	S	24	7	31	1	26	3	81	5	23	5	33	10	0.225806	0.03125	0.103448	0.0581395	0.178571	0.232558	0.906882	-0.0146511	0
Lhk-2	11	T	T	C	R	R	S	30	1	56	0	80	1	203	3	40	0	60	7	0.0322581	0	0.0123457	0.0145631	0	0.104478	0.595633	-0.0167176	0
Lhk-2	20	T	T	A	R	R	S	31	1	77	0	152	0	338	0	88	0	127	0	0.03125	0	0	0	0	0	0.5	0.015625	0
Lhk-2	26	G	G	T	L	F	N	29	3	71	12	155	14	382	12	87	6	121	8	0.09375	0.144578	0.0828402	0.0304569	0.0645161	0.0620155	0.219214	0.059207	0
Lhk-2	28	G	G	A	S	N	N	29	3	78	12	158	14	393	12	89	6	122	8	0.09375	0.133333	0.0813953	0.0296296	0.0631579	0.0615385	0.163978	0.0546113	0
Lhk-2	32	G	G	C	W	C	N	29	3	87	12	163	14	407	12	91	6	124	8	0.09375	0.121212	0.079096	0.0286396	0.0618557	0.0606061	0.0885351	0.0499317	0
Lhk-2	35	C	C	A	G	G	S	30	2	94	10	184	4	438	18	114	6	151	3	0.0625	0.0961538	0.0212766	0.0394737	0.05	0.0194805	0.176558	0.0467692	0
Lhk-2	36	A	A	G	K	E	N	28	4	86	19	174	14	444	17	112	9	146	9	0.125	0.180952	0.0744681	0.0368764	0.0743802	0.0580645	0.160899	0.0920289	0
Lhk-2	43	C	C	T	S	F	N	29	3	104	18	202	15	504	19	128	8	166	9	0.09375	0.147541	0.0691244	0.0363289	0.0588235	0.0514286	0.226683	0.0667191	0
Lhk-2	51	T	T	A	W	R	N	30	2	135	11	210	16	509	55	151	14	174	17	0.0625	0.0753425	0.0707965	0.0975177	0.0848485	0.0890052	0.160161	-0.0166207	0
Lhk-2	61	G	G	T	W	L	N	30	2	158	13	246	0	598	13	219	2	241	2	0.0625	0.0760234	0	0.0212766	0.00904977	0.00823045	0.0202856	0.0596225	1
Lhk-2	62	G	G	T	W	C	N	31	1	166	4	239	7	594	18	212	11	238	7	0.03125	0.0235294	0.0284553	0.0294118	0.0493274	0.0285714	0.368877	-0.00655175	0
Lhk-2	87	G	G	A	A	T	N	32	1	246	9	286	1	705	5	272	4	264	1	0.030303	0.0352941	0.00348432	0.00704225	0.0144928	0.00377358	0.00515028	0.0256003	0
Lhk-2	89	A	A	C	A	A	S	27	6	217	44	251	36	573	139	223	48	214	46	0.181818	0.168582	0.125436	0.195225	0.177122	0.176923	0.712379	0.006524	0
Lhk-2	108	G	G	T	A	S	N	28	5	268	47	217	77	576	185	225	44	204	51	0.151515	0.149206	0.261905	0.243101	0.163569	0.2	0.0562414	-0.0667829	0
Lhk-2	115	A	A	C	H	P	N	32	1	315	4	314	0	813	0	288	0	275	0	0.030303	0.0125392	0	0	0	0	0.250229	0.0214211	0
Lhk-2	121	C	C	A	T	N	N	30	2	315	18	306	13	797	33	283	7	273	12	0.0625	0.0540541	0.0407524	0.039759	0.0241379	0.0421053	0.036418	0.0215884	0
Lhk-2	132	A	A	T	T	S	N	32	1	322	9	317	0	841	0	278	0	280	0	0.030303	0.0271903	0	0	0	0	0.0344331	0.0287467	1
Lhk-2	136	A	A	G	D	G	N	32	1	325	4	280	1	792	6	238	0	240	2	0.030303	0.0121581	0.00355872	0.0075188	0	0.00826446	0.311835	0.016395	0
Lhk-2	138	G	G	A	E	K	N	32	1	326	12	250	0	728	11	225	4	227	0	0.030303	0.035503	0	0.014885	0.0174672	0	0.00990784	0.0248149	0
Lhk-2	171	G	G	A	D	N	N	35	1	356	15	225	3	666	26	310	7	286	7	0.0277778	0.0404313	0.0131579	0.0375723	0.022082	0.0238908	0.328145	0.00992878	0
Lhk-2	173	T	T	A	D	E	N	35	1	355	15	225	5	677	20	312	7	280	11	0.0277778	0.0405405	0.0217391	0.0286944	0.0219436	0.0378007	0.477751	0.00661471	0
Lhk-2	175	C	C	T	P	L	N	34	2	363	5	221	0	679	3	314	4	287	3	0.0555556	0.013587	0	0.00439883	0.0125786	0.0103448	0.409238	0.0277407	0
Lhk-2	184	C	C	T	P	L	N	34	2	363	11	187	57	669	73	339	21	304	18	0.0555556	0.0294118	0.233607	0.0983827	0.0583333	0.0559006	0.199817	-0.0690722	0
Lhk-2	186	C	C	G	R	G	N	35	1	361	12	242	3	724	26	327	9	302	11	0.0277778	0.0321716	0.0122449	0.0346667	0.0267857	0.0351438	0.658702	0.00276442	0
Lhk-2	216	G	G	A	D	N	N	35	1	363	10	274	0	835	0	410	0	366	2	0.0277778	0.0268097	0	0	0	0.00543478	0.000110402	0.025935	0
Lhk-2	224	G	G	T	K	N	N	35	1	373	12	297	0	885	0	407	0	360	0	0.0277778	0.0311688	0	0	0	0	0.0365828	0.0294733	1
Lhk-2	227	C	C	T	I	I	S	31	5	329	69	281	13	819	59	365	28	323	27	0.138889	0.173367	0.0442177	0.0671982	0.0712468	0.0771429	0.0794479	0.0911765	0
Lhk-2	233	C	C	A	G	G	S	34	2	375	20	287	5	843	18	366	4	296	12	0.0555556	0.0506329	0.0171233	0.0209059	0.0108108	0.038961	0.0102064	0.031144	1
Lhk-2	252	T	T	G	C	G	N	32	5	372	45	221	72	704	197	295	61	262	58	0.135135	0.107914	0.245734	0.218646	0.171348	0.18125	0.0231252	-0.0827201	1
Lhk-2	262	T	T	A	F	Y	N	35	1	397	16	295	4	928	16	398	3	337	8	0.0277778	0.0387409	0.0133779	0.0169492	0.0074813	0.0231884	0.121407	0.0180102	0
Lhk-2	263	C	C	T	F	F	S	34	2	398	25	295	6	927	22	397	5	334	10	0.0555556	0.0591017	0.0199336	0.0231823	0.0124378	0.0290698	0.000782054	0.0361727	1
Lhk-2	274	G	G	A	G	D	N	36	1	447	11	295	7	901	37	359	24	302	17	0.027027	0.0240175	0.0231788	0.0394456	0.0626632	0.0532915	0.111171	-0.0191225	0
Lhk-2	277	A	A	G	D	G	N	37	1	449	12	305	0	950	0	404	0	337	0	0.0263158	0.0260304	0	0	0	0	0.00347117	0.0261731	0
Lhk-2	281	T	T	A	N	K	N	37	1	437	11	305	8	942	37	377	21	324	18	0.0263158	0.0245536	0.0255591	0.0377937	0.0527638	0.0526316	0.0825542	-0.0167524	0
Lhk-2	284	C	C	T	L	L	S	35	3	413	37	331	2	1018	11	406	3	340	7	0.0789474	0.0822222	0.00600601	0.01069	0.00733496	0.0201729	4.50332e-05	0.0695338	1
Lhk-2	285	C	C	T	L	L	S	37	1	436	14	335	0	1039	0	415	0	370	0	0.0263158	0.0311111	0	0	0	0	0.0530367	0.0287135	0
Lhk-2	303	T	T	C	S	P	N	38	1	448	12	304	3	1025	8	385	3	355	3	0.025641	0.026087	0.00977199	0.00774443	0.00773196	0.00837989	6.52571e-06	0.0174569	0
Lhk-2	304	C	C	T	S	F	N	38	1	465	15	318	2	1035	19	391	8	363	8	0.025641	0.03125	0.00625	0.0180266	0.0200501	0.0215633	0.0618192	0.011973	0
Lhk-2	316	G	G	A	G	D	N	38	1	487	16	352	4	1036	10	420	5	374	6	0.025641	0.0318091	0.011236	0.00956023	0.0117647	0.0157895	0.0760163	0.0166375	0
Lhk-2	321	C	C	T	P	S	N	38	2	462	36	340	24	972	82	383	39	359	24	0.05	0.0722892	0.0659341	0.0777989	0.0924171	0.0626632	0.418157	-0.0135587	0
Lhk-2	332	C	C	T	N	N	S	39	1	500	14	340	0	981	0	367	0	341	1	0.025	0.0272374	0	0	0	0.00292398	0.00332162	0.0253877	0
Lhk-2	333	G	G	T	V	F	N	39	1	493	20	334	7	969	18	373	4	335	12	0.025	0.0389864	0.0205279	0.0182371	0.0106101	0.0345821	0.323688	0.0110039	0
Lhk-2	347	C	C	A	T	T	S	36	4	448	50	271	64	738	195	357	73	297	77	0.1	0.100402	0.191045	0.209003	0.169767	0.205882	0.00185513	-0.0937236	1
Lhk-2	348	C	C	T	R	C	N	39	1	489	9	335	0	938	0	428	1	373	0	0.025	0.0180723	0	0	0.002331	0	0.0965316	0.0209534	0
Lhk-2	360	G	G	A	E	K	N	38	1	489	11	314	3	896	29	434	8	372	8	0.025641	0.022	0.00946372	0.0313514	0.0180995	0.0210526	0.478199	0.0038287	0
Lhk-2	384	T	T	A	C	S	N	35	4	437	49	220	10	882	43	407	29	386	20	0.102564	0.100823	0.0434783	0.0464865	0.0665138	0.0492611	0.00191506	0.0502587	1
Lhk-2	391	A	A	C	Q	P	N	34	5	432	52	181	65	742	213	333	83	311	88	0.128205	0.107438	0.264228	0.223037	0.199519	0.220551	0.00395501	-0.109012	1
Lhk-2	404	G	G	A	T	T	S	34	4	437	52	226	9	935	49	439	21	424	20	0.105263	0.106339	0.0382979	0.0497967	0.0456522	0.045045	7.21704e-05	0.0611034	1
Lhk-2	422	T	T	G	N	K	N	37	1	515	11	216	1	960	5	421	3	423	4	0.0263158	0.0209125	0.00460829	0.00518135	0.00707547	0.00936768	0.0654903	0.017056	0
Lhk-2	438	G	G	A	D	N	N	37	1	507	19	212	0	916	7	412	0	420	3	0.0263158	0.0361217	0	0.00758397	0	0.0070922	0.0713998	0.0275497	0
Lhk-2	441	G	G	C	E	Q	N	37	1	515	14	205	8	904	24	399	13	404	20	0.0263158	0.026465	0.0375587	0.0258621	0.0315534	0.0471698	0.138212	-0.00914558	0
Lhk-2	447	C	C	T	H	Y	N	37	1	534	11	197	3	877	16	409	5	420	2	0.0263158	0.0201835	0.015	0.0179171	0.0120773	0.00473934	0.0880557	0.0108162	0
Lhk-2	452	G	G	C	V	V	S	37	1	528	13	201	3	892	8	423	3	431	3	0.0263158	0.0240296	0.0147059	0.00888889	0.00704225	0.00691244	0.0018921	0.0157853	0
Lhk-2	455	C	C	G	R	R	S	37	1	520	19	196	7	880	26	413	13	420	18	0.0263158	0.0352505	0.0344828	0.0286976	0.0305164	0.0410959	0.639176	-0.00291504	0
Lhk-2	471	A	A	C	N	H	N	32	1	537	3	218	0	943	0	453	0	449	0	0.030303	0.00555556	0	0	0	0	0.384568	0.0179293	0
Lhk-2	480	A	A	T	T	S	N	36	1	508	13	230	0	995	0	418	0	418	0	0.027027	0.024952	0	0	0	0	0.0254005	0.0259895	0
Lhk-2	495	C	C	A	P	T	N	36	1	508	0	243	0	983	0	380	0	404	0	0.027027	0	0	0	0	0	0.5	0.0135135	0
Lhk-2	503	A	A	G	A	A	S	36	1	523	24	263	5	987	26	405	14	411	13	0.027027	0.0438757	0.0186567	0.0256663	0.0334129	0.0306604	0.493367	0.00835228	0
Lhk-2	515	T	T	A	A	A	S	36	1	550	1	267	0	976	0	392	0	386	0	0.027027	0.00181488	0	0	0	0	0.457315	0.014421	0
Lhk-2	521	G	G	A	Q	Q	S	35	1	544	19	284	2	998	8	387	0	367	3	0.0277778	0.0337478	0.00699301	0.00795229	0	0.00810811	0.0222894	0.0249994	0
Lhk-2	527	G	G	A	P	P	S	32	4	478	82	253	35	857	133	329	56	303	47	0.111111	0.146429	0.121528	0.134343	0.145455	0.134286	0.821101	-0.00513303	0
Lhk-2	532	T	T	G	L	STOP	N	36	1	558	3	287	0	955	0	378	0	360	0	0.027027	0.00534759	0	0	0	0	0.375644	0.0161873	0
Lhk-2	533	A	A	T	L	F	N	36	1	564	1	287	0	957	0	387	0	380	0	0.027027	0.00176991	0	0	0	0	0.458369	0.0143985	0
Lhk-2	534	G	G	C	E	Q	N	36	1	569	4	294	0	975	0	392	0	383	0	0.027027	0.0069808	0	0	0	0	0.339085	0.0170039	0
Lhk-2	536	G	G	A	E	E	S	36	1	571	2	306	0	995	0	400	0	385	0	0.027027	0.0034904	0	0	0	0	0.418236	0.0152587	0
Lhk-2	537	G	G	C	E	Q	N	36	1	578	3	296	1	965	0	394	0	374	0	0.027027	0.00516351	0.003367	0	0	0	0.39479	0.0152535	0
Lhk-2	560	C	C	A	I	I	S	37	1	603	17	328	10	942	30	386	7	341	14	0.0263158	0.0274194	0.0295858	0.0308642	0.0178117	0.0394366	0.607032	-0.00255701	0
Lhk-2	563	C	C	T	A	A	S	37	1	593	24	339	3	972	17	378	8	351	3	0.0263158	0.0388979	0.00877193	0.0171891	0.0207254	0.00847458	0.154064	0.0188166	0
Lhk-2	566	T	T	A	D	E	N	37	1	594	12	312	21	940	21	364	8	322	12	0.0263158	0.019802	0.0630631	0.0218522	0.0215054	0.0359281	0.297441	-0.0125283	0
Lhk-2	569	G	G	C	L	L	S	36	2	597	25	302	35	946	34	362	12	322	13	0.0526316	0.0401929	0.103858	0.0346939	0.0320856	0.038806	0.763041	-0.00594849	0
Lhk-2	572	C	C	A	G	G	S	24	13	375	215	206	139	510	471	182	176	180	141	0.351351	0.364407	0.402899	0.480122	0.49162	0.439252	0.0143577	-0.0955943	1
Lhk-2	590	T	T	A	Y	STOP	N	37	1	629	18	347	14	980	13	389	5	340	3	0.0263158	0.0278207	0.0387812	0.0130916	0.0126904	0.00874636	0.294448	0.00874087	0
Lhk-2	618	C	C	T	R	C	N	37	1	653	14	325	59	1000	112	371	34	332	23	0.0263158	0.0209895	0.153646	0.100719	0.0839506	0.0647887	0.0260976	-0.0771235	1
Lhk-2	624	T	T	C	Y	H	N	37	1	642	26	374	0	1079	0	389	1	356	0	0.0263158	0.0389222	0	0	0.0025641	0	0.120836	0.0319779	0
Lhk-2	630	T	T	G	S	A	N	31	8	496	152	306	77	794	262	256	105	234	115	0.205128	0.234568	0.201044	0.248106	0.290859	0.329513	0.204224	-0.0475325	0
Lhk-2	633	C	C	G	L	V	N	38	1	634	17	370	2	1048	7	377	4	360	3	0.025641	0.0261137	0.00537634	0.00663507	0.0104987	0.00826446	0.000323617	0.0181837	0
Lhk-2	636	G	G	T	E	STOP	N	38	1	637	14	378	0	1060	0	397	0	362	1	0.025641	0.0215054	0	0	0	0.00275482	0.0374174	0.0228845	0
Lhk-2	642	A	A	G	I	V	N	33	6	570	74	363	32	1040	33	412	15	367	15	0.153846	0.114907	0.0810127	0.0307549	0.0351288	0.039267	0.0737738	0.0878356	0
Lhk-2	648	G	G	T	G	C	N	38	1	612	23	385	8	1027	46	379	18	347	15	0.025641	0.0362205	0.0203562	0.0428705	0.0453401	0.0414365	0.458466	-0.00657005	0
Lhk-2	681	A	A	T	S	C	N	32	6	494	96	233	92	775	222	313	83	298	67	0.157895	0.162712	0.283077	0.222668	0.209596	0.183562	0.0542166	-0.0644223	0
Lhk-2	686	T	T	G	T	T	S	36	2	541	38	276	20	929	28	395	13	344	21	0.0526316	0.0656304	0.0675676	0.0292581	0.0318627	0.0575342	0.336695	0.0125753	0
Lhk-2	691	G	G	T	C	F	N	37	1	554	19	282	2	931	7	419	2	371	4	0.0263158	0.0331588	0.00704225	0.00746269	0.00475059	0.0106667	0.0683601	0.0222568	0
Lhk-2	712	C	C	T	T	I	N	39	1	562	16	263	1	890	2	408	3	343	2	0.025	0.0276817	0.00378788	0.00224215	0.00729927	0.0057971	0.00282538	0.0215592	0
Lhk-2	738	T	T	C	S	P	N	39	1	545	20	235	5	859	13	365	3	331	6	0.025	0.0353982	0.0208333	0.0149083	0.00815217	0.0178042	0.160311	0.0147746	0
Lhk-2	749	G	G	A	S	S	S	39	1	538	13	237	2	918	7	368	4	360	4	0.025	0.0235935	0.0083682	0.00756757	0.0107527	0.010989	0.000357196	0.0148774	0
Lhk-2	766	A	A	G	D	G	N	38	2	509	44	198	10	758	36	281	16	283	11	0.05	0.079566	0.0480769	0.0453401	0.0538721	0.037415	0.41989	0.018607	0
Lhk-2	768	C	C	T	H	Y	N	39	1	544	14	200	0	765	0	285	0	285	0	0.025	0.0250896	0	0	0	0	0.00113886	0.0250448	0
Lhk-2	805	C	C	G	P	R	N	39	2	558	30	204	16	716	24	333	10	298	14	0.0487805	0.0510204	0.0727273	0.0324324	0.0291545	0.0448718	0.643187	0.00510394	0
Lhk-2	806	G	G	A	P	P	S	39	2	543	39	207	12	689	54	311	25	295	19	0.0487805	0.0670103	0.0547945	0.0726783	0.0744048	0.0605096	0.549252	-0.00770139	0
Lhk-2	813	A	A	T	I	F	N	40	1	549	15	214	1	713	0	323	4	290	3	0.0243902	0.0265957	0.00465116	0	0.0122324	0.0102389	0.00410405	0.0187124	0
Lhk-2	820	T	T	C	L	S	N	38	1	538	15	216	0	693	0	352	1	306	0	0.025641	0.0271248	0	0	0.00283286	0	0.000193194	0.0256747	0
Lhk-2	856	C	C	T	S	F	N	37	1	553	10	182	25	612	72	296	23	256	25	0.0263158	0.017762	0.120773	0.105263	0.0721003	0.088968	0.00335268	-0.0747372	1
Lhk-2	863	G	G	A	E	E	S	37	1	550	7	210	0	668	1	285	0	269	0	0.0263158	0.0125673	0	0.00149477	0	0	0.219392	0.0190679	0
Lhk-2	866	A	A	G	L	L	S	37	1	548	8	180	0	617	1	273	0	242	1	0.0263158	0.0143885	0	0.00161812	0	0.00411523	0.186523	0.0189188	0
Lhk-2	868	G	G	A	R	Q	N	37	1	549	15	184	1	621	15	270	7	239	7	0.0263158	0.0265957	0.00540541	0.0235849	0.0252708	0.0284553	0.346922	0.00577668	0
Lhk-2	876	T	T	A	S	T	N	37	1	520	21	187	0	630	4	266	0	240	1	0.0263158	0.038817	0	0.00630915	0	0.00414938	0.11356	0.0299518	0
Lhk-2	877	C	C	A	S	STOP	N	37	1	543	20	189	0	636	3	270	0	251	1	0.0263158	0.035524	0	0.00469484	0	0.00396825	0.0822983	0.0287541	0
Lhk-2	893	G	G	C	W	C	N	40	1	548	19	188	7	578	23	215	9	195	12	0.0243902	0.0335097	0.0358974	0.0382696	0.0401786	0.057971	0.120945	-0.0141292	0
Lhk-2	902	G	G	T	M	I	N	40	1	543	24	181	4	528	12	226	9	201	9	0.0243902	0.042328	0.0216216	0.0222222	0.0382979	0.0428571	0.86122	0.00210943	0
Lhk-2	905	C	C	A	D	E	N	37	4	509	57	156	31	466	71	206	34	182	23	0.097561	0.100707	0.165775	0.132216	0.141667	0.112195	0.0383732	-0.0388295	1
Lhk-2	908	T	T	C	V	V	S	40	1	548	9	176	3	504	0	234	1	209	2	0.0243902	0.016158	0.0167598	0	0.00425532	0.00947867	0.116866	0.0126507	0
Lhk-2	909	C	C	T	L	F	N	40	1	554	7	176	3	503	0	236	1	212	2	0.0243902	0.0124777	0.0167598	0	0.00421941	0.00934579	0.273507	0.0108527	0
Lhk-2	930	T	T	G	S	A	N	37	3	492	39	157	2	448	14	233	5	229	6	0.075	0.0734463	0.0125786	0.030303	0.0210084	0.0255319	0.000588274	0.0518677	1
Lhk-2	937	A	A	T	K	M	N	27	13	325	185	112	50	305	176	144	111	139	110	0.325	0.362745	0.308642	0.365904	0.435294	0.441767	0.296838	-0.0440293	0
Lhk-2	938	G	G	A	K	K	S	36	4	477	44	126	36	426	56	233	26	222	28	0.1	0.084453	0.222222	0.116183	0.100386	0.112	0.209067	-0.0454712	0
Lhk-2	939	G	G	A	D	N	N	39	1	509	14	156	7	458	28	240	19	235	16	0.025	0.0267686	0.0429448	0.0576132	0.0733591	0.063745	0.0125291	-0.0335312	1
Lhk-2	945	G	G	T	A	S	N	31	9	409	128	150	14	455	61	227	31	223	27	0.225	0.238361	0.0853659	0.118217	0.120155	0.108	0.000585222	0.123746	1
Lhk-2	954	G	G	C	A	P	N	39	1	498	20	167	6	543	18	268	7	253	10	0.025	0.03861	0.0346821	0.0320856	0.0254545	0.0380228	0.931046	-0.000756231	0
Lhk-2	962	C	C	T	F	F	S	39	1	483	23	176	0	566	16	276	8	256	5	0.025	0.0454545	0	0.0274914	0.028169	0.0191571	0.313663	0.0165229	0
Lhk-2	969	C	C	A	P	T	N	39	1	483	7	181	0	601	1	306	0	290	0	0.025	0.0142857	0	0.00166113	0	0	0.171132	0.0192276	0
Lhk-2	972	A	A	G	M	V	N	39	1	476	10	181	1	599	8	310	4	287	5	0.025	0.0205761	0.00549451	0.0131796	0.0127389	0.0171233	0.0420686	0.010654	0
Lhk-2	977	C	C	T	L	L	S	39	1	485	12	195	0	626	3	322	1	315	0	0.025	0.0241449	0	0.00476948	0.00309598	0	0.000108942	0.0226061	0
Lhk-2	978	G	G	T	E	STOP	N	37	3	480	19	194	3	621	14	316	6	315	3	0.075	0.0380762	0.0152284	0.0220472	0.0186335	0.00943396	0.268454	0.0402023	0
Lhk-2	981	C	C	T	L	F	N	39	1	482	12	201	6	640	19	327	5	331	1	0.025	0.0242915	0.0289855	0.0288316	0.0150602	0.00301205	0.430659	0.00567341	0
Lhk-2	984	G	G	A	D	N	N	38	2	477	21	204	4	652	3	329	6	324	5	0.05	0.0421687	0.0192308	0.00458015	0.0179104	0.0151976	0.0137669	0.0318546	1
Lhk-2	992	C	C	A	N	K	N	40	1	495	11	197	2	629	22	323	10	326	5	0.0243902	0.0217391	0.0100503	0.0337942	0.03003	0.0151057	0.897197	0.000819641	0
Lhk-2	1001	C	C	T	A	A	S	40	1	468	20	192	1	644	1	308	2	304	0	0.0243902	0.0409836	0.00518135	0.00155039	0.00645161	0	0.165321	0.0293911	0
Lhk-2	1005	G	G	A	A	T	N	40	1	475	16	170	8	616	25	288	8	289	14	0.0243902	0.0325866	0.0449438	0.0390016	0.027027	0.0462046	0.163703	-0.0108059	0
Lhk-2	1007	T	T	A	A	A	S	40	1	476	0	180	0	635	0	290	0	297	0	0.0243902	0	0	0	0	0	0.5	0.0121951	0
Lhk-2	1008	G	G	T	A	S	N	40	1	494	3	180	0	637	0	281	0	292	0	0.0243902	0.00603622	0	0	0	0	0.34555	0.0152132	0
Lhk-2	1019	G	G	A	L	L	S	39	2	475	30	197	2	659	17	308	5	310	3	0.0487805	0.0594059	0.0100503	0.0251479	0.0159744	0.00958466	0.0261719	0.0389039	1
Lhk-2	1028	G	G	A	P	P	S	39	2	470	33	206	3	686	17	346	6	326	4	0.0487805	0.0656064	0.0143541	0.0241821	0.0170455	0.0121212	0.105792	0.0402677	0
Lhk-2	1029	T	T	G	W	G	N	40	1	496	7	208	1	702	1	347	3	326	2	0.0243902	0.0139165	0.00478469	0.00142248	0.00857143	0.00609756	0.207584	0.0139343	0
Lhk-2	1030	G	G	A	W	STOP	N	40	1	493	10	202	8	687	16	346	9	328	6	0.0243902	0.0198807	0.0380952	0.0227596	0.0253521	0.0179641	0.466271	-0.00390728	0
Lhk-2	1031	G	G	A	W	STOP	N	40	1	499	9	206	8	688	18	351	8	333	6	0.0243902	0.0177165	0.0373832	0.0254958	0.0222841	0.0176991	0.438658	-0.00466215	0
Lhk-2	1045	C	C	T	UTR	UTR	UTR	40	1	501	10	229	0	744	1	337	0	312	0	0.0243902	0.0195695	0	0.00134228	0	0	0.0659606	0.0216443	0
Lhk-2	1053	C	C	A	UTR	UTR	UTR	40	1	489	8	203	17	705	17	330	7	302	3	0.0243902	0.0160966	0.0772727	0.0235457	0.0207715	0.00983607	0.472862	-0.0126131	0
Lhk-2	1057	G	G	T	UTR	UTR	UTR	40	1	481	15	226	1	716	5	334	1	296	2	0.0243902	0.0302419	0.00440529	0.00693481	0.00298507	0.00671141	0.0606634	0.0220569	0
Lhk-2	1072	C	C	T	UTR	UTR	UTR	36	5	401	55	218	31	626	128	308	53	262	59	0.121951	0.120614	0.124498	0.169761	0.146814	0.183801	0.0748373	-0.0349359	0
Lhk-2	1075	C	C	G	UTR	UTR	UTR	34	7	403	58	146	116	582	196	287	73	261	70	0.170732	0.125813	0.442748	0.251928	0.202778	0.21148	0.104747	-0.128961	0
Lhk-2	1080	C	C	G	UTR	UTR	UTR	39	2	436	28	273	2	810	3	372	3	340	3	0.0487805	0.0603448	0.00727273	0.00369004	0.008	0.00874636	0.0678731	0.0476354	0
Lhk-2	1081	C	C	T	UTR	UTR	UTR	40	1	455	11	279	0	817	3	373	4	345	0	0.0243902	0.0236052	0	0.00365854	0.0106101	0	0.00334261	0.0204305	0
Lhk-2	1083	G	G	A	UTR	UTR	UTR	40	1	463	10	293	0	833	0	381	0	351	0	0.0243902	0.0211416	0	0	0	0	0.0453445	0.0227659	0
Lhk-2	1089	G	G	A	UTR	UTR	UTR	39	2	437	29	289	18	789	85	352	24	330	33	0.0487805	0.0622318	0.0586319	0.097254	0.0638298	0.0909091	0.134702	-0.0221501	0
Lhk-2	1097	A	A	G	UTR	UTR	UTR	40	1	432	14	306	1	878	1	367	6	358	5	0.0243902	0.0313901	0.00325733	0.00113766	0.0160858	0.0137741	0.0291773	0.0193265	0
Lhk-2	1098	G	G	C	UTR	UTR	UTR	39	2	428	17	311	2	882	1	369	8	362	4	0.0487805	0.0382022	0.00638978	0.0011325	0.0212202	0.010929	0.0266603	0.0335735	1
Lhk-2	1100	G	G	A	UTR	UTR	UTR	39	1	431	8	324	0	878	0	372	1	354	2	0.025	0.0182232	0	0	0.00268097	0.00561798	0.0739674	0.0195369	0
Lhk-2	1102	G	G	A	UTR	UTR	UTR	39	1	436	1	317	1	842	1	364	0	345	0	0.025	0.00228833	0.00314465	0.00118624	0	0	0.467394	0.0125614	0
Lhk-2	1104	G	G	A	UTR	UTR	UTR	34	5	385	45	263	54	713	128	319	43	314	28	0.128205	0.104651	0.170347	0.1522	0.118785	0.0818713	0.56232	-0.0143725	0
Lhk-2	1118	C	C	T	UTR	UTR	UTR	40	1	433	10	311	16	854	27	362	9	323	17	0.0243902	0.0225734	0.0489297	0.030647	0.0242588	0.05	0.103154	-0.0149771	0
Lhk-2	1124	A	A	G	UTR	UTR	UTR	39	2	410	26	283	4	784	8	353	5	313	5	0.0487805	0.059633	0.0139373	0.010101	0.0139665	0.0157233	0.0725016	0.0407747	0
Lhk-2	1126	G	G	T	UTR	UTR	UTR	40	1	429	0	299	0	818	0	383	0	338	0	0.0243902	0	0	0	0	0	0.5	0.0121951	0
Lhk-2	1130	A	A	G	UTR	UTR	UTR	39	1	416	11	302	0	813	5	376	5	334	3	0.025	0.0257611	0	0.00611247	0.0131234	0.00890208	0.00630178	0.0183461	0
Lhk-2	1131	G	G	T	UTR	UTR	UTR	39	1	427	8	307	0	821	0	387	0	333	0	0.025	0.0183908	0	0	0	0	0.0962289	0.0216954	0
Lhk-2	1132	G	G	A	UTR	UTR	UTR	31	8	364	60	187	102	634	174	314	70	276	55	0.205128	0.141509	0.352941	0.215347	0.182292	0.166163	0.355489	-0.0558668	0
Lhk-2	1133	A	A	G	UTR	UTR	UTR	38	1	409	14	287	4	789	15	380	5	324	4	0.025641	0.0330969	0.0137457	0.0186567	0.012987	0.0121951	0.117706	0.0149728	0
Lhk-2	1158	G	G	T	UTR	UTR	UTR	39	1	395	15	297	0	816	2	455	2	352	1	0.025	0.0365854	0	0.00244499	0.00437637	0.00283286	0.121055	0.0283791	0
Lhk-2	1165	C	C	A	UTR	UTR	UTR	33	7	316	88	241	69	628	223	334	112	266	85	0.175	0.217822	0.222581	0.262045	0.251121	0.242165	0.233536	-0.048067	0
Lhk-2	1174	C	C	A	UTR	UTR	UTR	39	1	385	13	295	19	793	59	421	26	318	17	0.025	0.0326633	0.0605096	0.0692488	0.0581655	0.0507463	0.0108323	-0.0308359	1
Lhk-2	1184	A	A	T	UTR	UTR	UTR	39	1	357	12	308	3	852	17	422	2	323	1	0.025	0.0325203	0.0096463	0.0195627	0.00471698	0.00308642	0.0352459	0.0195071	0
Lhk-2	1201	A	A	G	UTR	UTR	UTR	39	1	365	7	246	9	794	27	332	18	247	13	0.025	0.0188172	0.0352941	0.0328867	0.0514286	0.05	0.0236699	-0.0204938	0
Lhk-2	1220	G	G	C	UTR	UTR	UTR	36	1	344	14	231	4	780	7	326	2	246	2	0.027027	0.0391061	0.0170213	0.00889454	0.00609756	0.00806452	0.124147	0.0230471	0
Lhk-2	1227	A	A	G	UTR	UTR	UTR	36	1	348	7	215	8	762	12	305	6	230	9	0.027027	0.0197183	0.0358744	0.0155039	0.0192926	0.0376569	0.611346	-0.00370929	0
Lhk-2	1243	C	C	T	UTR	UTR	UTR	36	1	318	8	227	5	832	5	290	2	256	2	0.027027	0.0245399	0.0215517	0.00597372	0.00684932	0.00775194	0.02135	0.0152518	0
Lhk-2	1261	C	C	A	UTR	UTR	UTR	36	1	294	6	226	1	840	4	317	1	290	3	0.027027	0.02	0.00440529	0.00473934	0.00314465	0.0102389	0.0793829	0.0178815	0
Lhk-2	1264	C	C	A	UTR	UTR	UTR	36	1	279	13	216	5	830	4	310	1	282	2	0.027027	0.0445205	0.0226244	0.00479616	0.00321543	0.00704225	0.149395	0.0263542	0
Lhk-2	1275	G	G	A	UTR	UTR	UTR	36	1	282	8	208	23	780	66	301	24	282	18	0.027027	0.0275862	0.0995671	0.0780142	0.0738462	0.06	0.00853874	-0.0505502	1
Lhk-2	1279	C	C	G	UTR	UTR	UTR	35	1	289	9	233	0	818	3	333	0	314	0	0.0277778	0.0302013	0	0.00365408	0	0	0.00177673	0.028076	0
Lhk-2	1289	C	C	A	UTR	UTR	UTR	36	1	288	12	226	0	830	0	322	0	289	0	0.027027	0.04	0	0	0	0	0.121712	0.0335135	0
Lhk-2	1291	G	G	C	UTR	UTR	UTR	35	2	278	16	212	3	788	2	299	1	276	3	0.0540541	0.0544218	0.0139535	0.00253165	0.00333333	0.0107527	0.000453465	0.0465951	1
Lhk-2	1293	C	C	T	UTR	UTR	UTR	35	2	279	16	192	21	727	70	287	23	271	14	0.0540541	0.0542373	0.0985915	0.0878294	0.0741935	0.0491228	0.117191	-0.0232886	0
Lhk-2	1295	T	T	A	UTR	UTR	UTR	36	1	277	11	205	7	757	30	295	7	278	7	0.027027	0.0381944	0.0330189	0.0381194	0.0231788	0.0245614	0.707343	0.00289111	0
Lhk-2	1297	A	A	G	UTR	UTR	UTR	36	1	285	7	213	1	790	5	322	2	293	0	0.027027	0.0239726	0.0046729	0.00628931	0.00617284	0	0.00247744	0.0212161	0
Lhk-2	1301	G	G	A	UTR	UTR	UTR	32	5	267	21	181	38	688	113	309	24	273	29	0.135135	0.0729167	0.173516	0.141074	0.0720721	0.0960265	0.705132	-0.0166461	0
Lhk-2	1310	C	C	A	UTR	UTR	UTR	36	1	281	5	224	0	798	13	331	9	298	4	0.027027	0.0174825	0	0.0160296	0.0264706	0.013245	0.32534	0.00831847	0
Lhk-2	1311	T	T	G	UTR	UTR	UTR	36	1	265	15	219	7	783	33	332	9	297	7	0.027027	0.0535714	0.0309735	0.0404412	0.026393	0.0230263	0.583354	0.0100908	0
Lhk-2	1313	C	C	T	UTR	UTR	UTR	36	1	277	4	221	4	808	21	340	6	305	8	0.027027	0.0142349	0.0177778	0.0253317	0.017341	0.0255591	0.915231	-0.000871461	0
Lhk-2	1314	G	G	C	UTR	UTR	UTR	36	1	274	3	226	0	833	0	348	0	313	0	0.027027	0.0108303	0	0	0	0	0.257366	0.0189287	0
Lhk-2	1315	T	T	A	UTR	UTR	UTR	35	1	268	6	226	0	820	13	339	9	306	4	0.0277778	0.0218978	0	0.0156062	0.0258621	0.0129032	0.138155	0.0112449	0
Lhk-2	1332	C	C	T	UTR	UTR	UTR	36	1	259	5	211	11	814	35	345	9	306	2	0.027027	0.0189394	0.0495495	0.041225	0.0254237	0.00649351	0.499204	-0.00768973	0
Lhk-2	1335	C	C	A	UTR	UTR	UTR	35	1	263	4	216	11	821	35	341	9	311	2	0.0277778	0.0149813	0.0484581	0.0408879	0.0257143	0.00638978	0.471418	-0.00898299	0
Lhk-2	1340	T	T	C	UTR	UTR	UTR	35	1	244	14	212	11	829	35	327	10	316	2	0.0277778	0.0542636	0.0493274	0.0405093	0.0296736	0.00628931	0.612577	0.00957079	0
Lhk-2	1343	A	A	G	UTR	UTR	UTR	34	1	249	5	221	0	851	0	340	0	331	0	0.0285714	0.019685	0	0	0	0	0.115934	0.0241282	0
Lhk-2	1348	C	C	A	UTR	UTR	UTR	34	1	255	6	216	4	845	6	348	3	353	3	0.0285714	0.0229885	0.0181818	0.00705053	0.00854701	0.00842697	0.032559	0.0152284	0
Lhk-2	1352	C	C	A	UTR	UTR	UTR	34	1	257	4	211	2	817	1	323	1	339	3	0.0285714	0.0153257	0.00938967	0.00122249	0.00308642	0.00877193	0.221534	0.0163309	0
Lhk-2	1357	C	C	A	UTR	UTR	UTR	34	1	258	4	204	0	786	10	302	5	328	6	0.0285714	0.0152672	0	0.0125628	0.0162866	0.0179641	0.33224	0.0102159	0
Lhk-2	1358	C	C	T	UTR	UTR	UTR	34	1	253	9	201	4	785	5	306	2	330	3	0.0285714	0.0343511	0.0195122	0.00632911	0.00649351	0.00900901	0.0131443	0.0211253	0
Lhk-2	1369	A	A	T	UTR	UTR	UTR	33	1	246	3	213	0	765	0	282	0	326	0	0.0294118	0.0120482	0	0	0	0	0.25249	0.02073	0
Lhk-2	1372	C	C	T	UTR	UTR	UTR	33	1	252	9	191	18	731	23	249	12	306	14	0.0294118	0.0344828	0.0861244	0.030504	0.045977	0.04375	0.200723	-0.0196416	0
Lhk-2	1375	C	C	T	UTR	UTR	UTR	33	1	247	7	210	0	748	0	250	1	307	2	0.0294118	0.0275591	0	0	0.00398406	0.00647249	0.000149243	0.0258713	0
Lhk-2	1390	C	C	T	UTR	UTR	UTR	29	5	196	41	170	20	579	89	202	21	251	24	0.147059	0.172996	0.105263	0.133234	0.0941704	0.0872727	0.0647968	0.0550423	0
Lhk-2	1395	C	C	T	UTR	UTR	UTR	33	1	219	10	180	0	648	0	201	0	259	0	0.0294118	0.0436681	0	0	0	0	0.122651	0.0365399	0
Lhk-2	1397	T	T	G	UTR	UTR	UTR	33	1	210	9	177	0	627	7	191	2	250	0	0.0294118	0.0410959	0	0.011041	0.0103627	0	0.0679462	0.0299029	0
Lhk-2	1398	A	A	G	UTR	UTR	UTR	29	5	197	21	154	23	550	80	183	18	223	32	0.147059	0.0963303	0.129944	0.126984	0.0895522	0.12549	0.909462	0.00370203	0
Lhk-2	1399	C	C	A	UTR	UTR	UTR	33	1	207	11	177	0	629	0	201	0	258	0	0.0294118	0.0504587	0	0	0	0	0.164029	0.0399352	0
Lhk-2	1402	G	G	A	UTR	UTR	UTR	33	1	212	3	169	4	606	4	190	1	245	2	0.0294118	0.0139535	0.0231214	0.00655738	0.0052356	0.00809717	0.363477	0.0109297	0
Lhk-2	1404	C	C	A	UTR	UTR	UTR	33	1	203	10	174	0	606	0	197	0	252	0	0.0294118	0.0469484	0	0	0	0	0.143712	0.0381801	0
Lhk-2	1408	G	G	A	UTR	UTR	UTR	34	1	194	10	170	0	596	1	202	0	251	0	0.0285714	0.0490196	0	0.00167504	0	0	0.165233	0.0383768	0
Lhk-2	1425	G	G	A	UTR	UTR	UTR	34	1	173	5	128	11	433	42	157	11	187	12	0.0285714	0.0280899	0.0791367	0.0884211	0.0654762	0.0603015	0.00589018	-0.0450032	1
Lhk-2	1430	G	G	T	UTR	UTR	UTR	31	1	147	8	126	0	430	5	149	0	179	0	0.03125	0.0516129	0	0.0114943	0	0	0.14236	0.0385579	0
Lhk-2	1434	T	T	A	UTR	UTR	UTR	31	1	140	12	112	0	399	0	146	0	173	0	0.03125	0.0789474	0	0	0	0	0.260052	0.0550987	0
Lhk-2	1452	G	G	A	UTR	UTR	UTR	35	1	129	3	97	1	332	2	134	3	146	2	0.0277778	0.0227273	0.0102041	0.00598802	0.0218978	0.0135135	0.0460925	0.0123517	0
Lhk-2	1458	C	C	T	UTR	UTR	UTR	30	5	104	8	72	7	255	33	119	6	118	11	0.142857	0.0714286	0.0886076	0.114583	0.048	0.0852713	0.634737	0.0230273	0
Lhk-2	1461	G	G	T	UTR	UTR	UTR	35	1	109	2	82	0	292	0	127	1	133	0	0.0277778	0.018018	0	0	0.0078125	0	0.106911	0.0209448	0
Lhk-2	1466	A	A	T	UTR	UTR	UTR	35	1	93	0	79	0	278	0	122	0	130	0	0.0277778	0	0	0	0	0	0.5	0.0138889	0
Lhk-2	1468	T	T	A	UTR	UTR	UTR	35	1	83	0	79	0	275	0	121	0	127	0	0.0277778	0	0	0	0	0	0.5	0.0138889	0
Lhk-2	1469	A	A	T	UTR	UTR	UTR	25	11	47	28	48	31	150	123	51	65	55	71	0.305556	0.373333	0.392405	0.450549	0.560345	0.563492	0.0542267	-0.152253	0
Lhk-2	1470	G	G	A	UTR	UTR	UTR	24	12	61	10	64	14	238	27	108	6	107	14	0.333333	0.140845	0.179487	0.101887	0.0526316	0.115702	0.408206	0.124662	0

## Sheet: mau
Supplementary file 21. The information and read coverage of each SNP in Y-linked gene families from Illumina reads. We listed the coverage of each SNP in Y-linked gene from each RNA-seq replicate and DNA-seq. We also recorded their frequency in our assembly and their translated amino acid. We estimated the expression level of each variant based on the SNP frequency in the genome. We also performe…
Gene	Laction	Ancestral nt	Ancestral or majority nt	Alternative (Dervived) nt	Ancestral aa	Dervived aa	Changes (Synonymous or Nonsynonymous)	Ancestral or majority in genome	Alternative count in genome	Ancestral or majority in illumina DNA-seq	Alternative count in illumina DNA-seq	Ancestral or majority in illumina RNA-seq R1	Alternative count in illumina RNA-seq R1	Ancestral or majority count in illumina RNA-seq R2	Alternative count in illumina RNA-seq R2	Ancestral or majority count in illumina RNA-seq R3	Alternative count in illumina RNA-seq R3	genome	illumina DNA-seq	RNA-seq R1	RNA-seq R2	RNA-seq R3	Welch Two Sample t-test	Diff	make 5 TPM diff
CK2ßtes-Y	12	C	C	G	P	P	S	78	5	20	0	144	2	75	2	128	0	0.060241	0	0.0136986	0.025974	0	0.674277	0.0168963	0
CK2ßtes-Y	13	C	C	T	Q	STOP	N	81	2	32	0	154	4	82	6	128	13	0.0240964	0	0.0253165	0.0681818	0.0921986	0.119842	-0.0498508	0
CK2ßtes-Y	16	A	A	C	N	H	N	79	4	91	0	118	0	81	0	139	0	0.0481928	0	0	0	0	0.5	0.0240964	0
CK2ßtes-Y	18	C	C	A	N	K	N	81	2	92	1	113	12	84	8	130	20	0.0240964	0.0107527	0.096	0.0869565	0.133333	0.0145203	-0.0880054	1
CK2ßtes-Y	21	C	C	G	N	K	N	70	10	85	16	106	9	78	3	139	9	0.125	0.158416	0.0782609	0.037037	0.0608108	0.0552022	0.083005	0
CK2ßtes-Y	23	A	A	G	N	S	N	49	5	141	6	181	18	129	14	215	20	0.0925926	0.0408163	0.0904523	0.0979021	0.0851064	0.516411	-0.0244491	0
CK2ßtes-Y	30	C	C	T	S	S	S	73	5	174	7	283	6	184	2	302	7	0.0641026	0.038674	0.0207612	0.0107527	0.0226537	0.210239	0.0333324	0
CK2ßtes-Y	32	G	G	T	S	I	N	73	9	189	13	283	10	179	12	292	17	0.109756	0.0643564	0.0341297	0.0628272	0.0550162	0.332141	0.0363986	0
CK2ßtes-Y	33	C	C	T	S	S	S	75	5	187	16	290	1	184	1	305	0	0.0625	0.0788177	0.00343643	0.00540541	0	0.0673884	0.0677116	0
CK2ßtes-Y	35	G	G	T	W	L	N	82	1	211	2	294	6	193	3	315	7	0.0120482	0.00938967	0.02	0.0153061	0.0217391	0.0380875	-0.00829615	0
CK2ßtes-Y	36	G	G	A	W	STOP	N	63	20	164	50	280	26	184	14	304	24	0.240964	0.233645	0.0849673	0.0707071	0.0731707	0.000118371	0.161023	1
CK2ßtes-Y	37	A	A	T	I	F	N	81	2	210	7	298	8	194	4	325	7	0.0240964	0.0322581	0.0261438	0.020202	0.0210843	0.372411	0.00570051	0
CK2ßtes-Y	39	C	C	T	I	I	S	81	2	238	2	312	1	202	0	339	1	0.0240964	0.00833333	0.00319489	0	0.00294118	0.319221	0.0141695	0
CK2ßtes-Y	41	G	G	T	S	I	N	81	1	246	3	324	6	207	4	358	7	0.0121951	0.0120482	0.0181818	0.0189573	0.0191781	0.00126661	-0.00665076	0
CK2ßtes-Y	42	T	T	A	S	R	N	82	1	247	1	322	8	203	8	346	19	0.0120482	0.00403226	0.0242424	0.0379147	0.0520548	0.0495215	-0.0300304	0
CK2ßtes-Y	44	G	T	G	W	L	N	48	33	144	106	117	211	86	129	169	194	0.407407	0.424	0.643293	0.6	0.534435	0.0246867	-0.176872	1
CK2ßtes-Y	49	C	C	T	L	F	N	74	4	249	15	287	37	189	29	326	38	0.0512821	0.0568182	0.114198	0.133028	0.104396	0.0113731	-0.0631568	0
CK2ßtes-Y	51	C	C	T	L	L	S	82	1	279	1	343	0	228	0	379	0	0.0120482	0.00357143	0	0	0	0.316541	0.00780981	0
CK2ßtes-Y	54	G	G	A	G	G	S	82	1	298	0	345	0	229	0	380	0	0.0120482	0	0	0	0	0.5	0.0060241	0
CK2ßtes-Y	55	A	A	G	I	V	N	82	1	288	8	338	7	230	0	380	1	0.0120482	0.027027	0.0202899	0	0.00262467	0.333626	0.0118994	0
CK2ßtes-Y	57	C	C	A	I	I	S	79	4	288	16	304	34	197	25	316	48	0.0481928	0.0526316	0.100592	0.112613	0.131868	0.0152409	-0.064612	0
CK2ßtes-Y	59	A	A	T	K	M	N	83	1	307	0	338	0	228	0	364	0	0.0119048	0	0	0	0	0.5	0.00595238	0
CK2ßtes-Y	61	G	G	T	G	C	N	82	1	315	5	341	1	233	1	373	2	0.0120482	0.015625	0.00292398	0.0042735	0.00533333	0.0817123	0.00965966	0
CK2ßtes-Y	62	G	G	A	G	D	N	81	2	304	16	348	3	237	1	380	1	0.0240964	0.05	0.00854701	0.00420168	0.00262467	0.240114	0.0319237	0
CK2ßtes-Y	63	C	C	T	G	G	S	81	1	323	0	351	0	239	0	382	0	0.0121951	0	0	0	0	0.5	0.00609756	0
CK2ßtes-Y	64	A	A	C	N	H	N	79	4	320	8	350	1	236	4	378	2	0.0481928	0.0243902	0.002849	0.0166667	0.00526316	0.226236	0.0280319	0
CK2ßtes-Y	66	C	C	A	N	K	N	79	5	309	21	349	13	233	16	378	24	0.0595238	0.0636364	0.0359116	0.064257	0.0597015	0.447227	0.00829005	0
CK2ßtes-Y	71	T	G	A	F	C	N	39	27	168	108	83	188	50	110	106	149	0.409091	0.391304	0.693727	0.6875	0.584314	0.0146336	-0.254983	1
CK2ßtes-Y	73	C	C	G	L	V	N	77	4	324	19	344	3	231	1	369	5	0.0493827	0.0553936	0.00864553	0.00431034	0.013369	0.00418404	0.0436132	0
CK2ßtes-Y	75	C	C	A	L	L	S	82	1	350	0	377	0	255	0	408	0	0.0120482	0	0	0	0	0.5	0.0060241	0
CK2ßtes-Y	77	G	G	T	C	F	N	80	2	332	12	335	34	222	34	366	40	0.0243902	0.0348837	0.0921409	0.132812	0.0985222	0.0155743	-0.0781882	0
CK2ßtes-Y	78	C	C	A	C	STOP	N	77	4	331	9	365	0	253	1	399	0	0.0493827	0.0264706	0	0.00393701	0	0.189076	0.0366143	0
CK2ßtes-Y	84	G	G	A	V	V	S	70	1	353	3	336	6	232	8	350	15	0.0140845	0.00842697	0.0175439	0.0333333	0.0410959	0.0944053	-0.019402	0
CK2ßtes-Y	85	C	C	A	P	T	N	71	1	353	7	344	0	242	0	364	0	0.0138889	0.0194444	0	0	0	0.105137	0.0166667	0
CK2ßtes-Y	87	C	C	G	P	P	S	72	1	362	2	358	0	257	0	372	0	0.0136986	0.00549451	0	0	0	0.257159	0.00959657	0
CK2ßtes-Y	94	T	T	C	Y	H	N	71	1	380	8	392	0	281	0	397	1	0.0138889	0.0206186	0	0	0.00251256	0.111793	0.0164162	0
CK2ßtes-Y	95	A	A	G	Y	C	N	71	2	378	5	388	4	276	5	396	2	0.0273973	0.0130548	0.0102041	0.0177936	0.00502513	0.399595	0.00921844	0
CK2ßtes-Y	96	C	C	T	Y	Y	S	70	2	398	0	394	0	282	0	399	0	0.0277778	0	0	0	0	0.5	0.0138889	0
CK2ßtes-Y	99	T	T	A	I	I	S	70	1	390	1	396	0	280	0	393	0	0.0140845	0.00255754	0	0	0	0.385645	0.00832103	0
CK2ßtes-Y	100	C	C	G	Q	E	N	70	1	394	0	400	0	280	1	393	0	0.0140845	0	0	0.00355872	0	0.556675	0.00585601	0
CK2ßtes-Y	102	G	G	T	Q	H	N	67	2	381	15	364	43	240	42	348	47	0.0289855	0.0378788	0.105651	0.148936	0.118987	0.012476	-0.0910927	1
CK2ßtes-Y	104	A	A	G	E	G	N	69	1	389	9	403	1	281	2	387	5	0.0142857	0.0226131	0.00247525	0.00706714	0.0127551	0.163042	0.0110169	0
CK2ßtes-Y	105	G	G	C	E	D	N	69	1	407	1	404	0	283	0	392	0	0.0142857	0.00245098	0	0	0	0.391829	0.00836835	0
CK2ßtes-Y	107	C	C	G	T	R	N	69	1	406	1	409	0	286	0	388	0	0.0142857	0.002457	0	0	0	0.391568	0.00837136	0
CK2ßtes-Y	115	C	C	T	Q	STOP	N	69	1	417	3	434	2	299	0	412	0	0.0142857	0.00714286	0.00458716	0	0	0.196156	0.00918523	0
CK2ßtes-Y	116	A	A	T	Q	L	N	69	1	414	0	429	0	300	0	409	0	0.0142857	0	0	0	0	0.5	0.00714286	0
CK2ßtes-Y	117	G	G	A	Q	Q	S	64	6	379	44	426	3	298	3	405	2	0.0857143	0.104019	0.00699301	0.00996678	0.004914	0.0604062	0.0875753	0
CK2ßtes-Y	119	T	T	C	M	T	N	69	1	422	2	431	0	305	0	408	2	0.0142857	0.00471698	0	0	0.00487805	0.327296	0.00787533	0
CK2ßtes-Y	121	G	G	A	G	S	N	66	4	390	36	371	56	247	53	341	59	0.0571429	0.084507	0.131148	0.176667	0.1475	0.0313679	-0.0809465	1
CK2ßtes-Y	123	C	C	A	G	G	S	65	4	383	37	401	31	278	21	377	31	0.057971	0.0880952	0.0717593	0.0702341	0.0759804	0.984169	0.000375205	0
CK2ßtes-Y	127	G	G	A	E	K	N	67	2	403	22	427	3	291	1	397	1	0.0289855	0.0517647	0.00697674	0.00342466	0.00251256	0.1904	0.0360705	0
CK2ßtes-Y	129	G	G	C	E	D	N	66	2	408	3	432	0	291	0	392	0	0.0294118	0.00729927	0	0	0	0.345136	0.0183555	0
CK2ßtes-Y	130	T	T	G	Y	D	N	66	3	387	22	412	21	274	15	367	20	0.0434783	0.0537897	0.0484988	0.0519031	0.0516796	0.75848	-0.00205985	0
CK2ßtes-Y	131	A	A	T	Y	F	N	66	2	402	4	430	2	288	1	388	0	0.0294118	0.00985222	0.00462963	0.00346021	0	0.328875	0.0169354	0
CK2ßtes-Y	137	C	C	G	T	S	N	67	1	423	0	441	0	301	0	389	0	0.0147059	0	0	0	0	0.5	0.00735294	0
CK2ßtes-Y	139	G	G	C	E	Q	N	67	1	421	0	423	0	298	0	373	0	0.0147059	0	0	0	0	0.5	0.00735294	0
CK2ßtes-Y	140	A	A	C	E	A	N	67	1	398	6	400	0	287	0	350	0	0.0147059	0.0148515	0	0	0	0.00313604	0.0147787	0
CK2ßtes-Y	141	G	G	C	E	D	N	67	2	385	20	378	18	273	12	334	15	0.0289855	0.0493827	0.0454545	0.0421053	0.0429799	0.744481	-0.00432914	0
CK2ßtes-Y	142	A	A	G	T	A	N	68	2	375	22	379	11	265	8	336	12	0.0285714	0.0554156	0.0282051	0.029304	0.0344828	0.552341	0.0113296	0
CK2ßtes-Y	143	C	C	T	T	I	N	62	7	343	69	362	29	256	19	321	26	0.101449	0.167476	0.0741688	0.0690909	0.074928	0.31187	0.0617333	0
CK2ßtes-Y	146	T	T	A	L	Q	N	68	1	389	12	395	0	267	0	341	1	0.0144928	0.0299252	0	0	0.00292398	0.217224	0.0212343	0
CK2ßtes-Y	147	G	G	A	L	L	S	69	1	410	0	380	14	240	26	331	13	0.0142857	0	0.035533	0.0977444	0.0377907	0.123642	-0.0498798	0
CK2ßtes-Y	148	C	C	G	Q	E	N	67	2	406	0	390	0	264	0	342	0	0.0289855	0	0	0	0	0.5	0.0144928	0
CK2ßtes-Y	149	A	A	C	Q	P	N	68	1	399	4	388	0	261	0	335	0	0.0144928	0.00992556	0	0	0	0.117713	0.0122092	0
CK2ßtes-Y	150	A	A	C	Q	H	N	67	2	397	5	388	0	261	0	336	0	0.0289855	0.0124378	0	0	0	0.241951	0.0207117	0
CK2ßtes-Y	151	G	G	T	V	L	N	68	1	406	1	391	0	262	0	338	0	0.0144928	0.002457	0	0	0	0.393088	0.00847488	0
CK2ßtes-Y	152	T	T	G	V	G	N	67	1	410	4	390	0	263	0	335	0	0.0147059	0.00966184	0	0	0	0.129943	0.0121839	0
CK2ßtes-Y	153	G	G	A	V	V	S	67	2	408	16	351	42	225	41	300	38	0.0289855	0.0377358	0.10687	0.154135	0.112426	0.0194209	-0.0911165	1
CK2ßtes-Y	154	A	A	G	I	V	N	69	1	403	2	386	0	266	0	335	0	0.0142857	0.00493827	0	0	0	0.28812	0.00961199	0
CK2ßtes-Y	156	C	C	A	I	I	S	50	21	327	100	355	40	238	34	302	46	0.295775	0.234192	0.101266	0.125	0.132184	0.108704	0.1455	0
CK2ßtes-Y	158	T	T	C	L	P	N	67	2	414	12	396	1	272	1	344	4	0.0289855	0.028169	0.00251889	0.003663	0.0114943	0.0136917	0.0226852	0
CK2ßtes-Y	159	G	G	T	L	L	S	68	1	419	9	397	0	272	1	342	1	0.0144928	0.021028	0	0.003663	0.00291545	0.102411	0.0155676	0
CK2ßtes-Y	160	A	A	G	N	D	N	68	1	412	2	395	0	272	0	342	1	0.0144928	0.00483092	0	0	0.00291545	0.313999	0.00869002	0
CK2ßtes-Y	163	C	C	A	P	T	N	70	1	421	4	389	0	275	0	346	0	0.0140845	0.00941176	0	0	0	0.124975	0.0117481	0
CK2ßtes-Y	167	T	T	G	V	G	N	51	19	323	81	332	21	243	18	307	28	0.271429	0.200495	0.0594901	0.0689655	0.0835821	0.123397	0.165283	0
CK2ßtes-Y	169	T	T	C	F	L	N	62	9	353	51	314	27	215	25	266	50	0.126761	0.126238	0.0791789	0.104167	0.158228	0.642203	0.0126413	0
CK2ßtes-Y	171	C	C	T	F	F	S	69	2	390	15	334	7	240	6	306	13	0.028169	0.037037	0.0205279	0.0243902	0.0407524	0.632285	0.00404621	0
CK2ßtes-Y	172	G	G	A	D	N	N	70	1	401	5	345	2	247	0	324	0	0.0140845	0.0123153	0.00576369	0	0	0.0168358	0.0112787	0
CK2ßtes-Y	175	A	A	C	S	R	N	69	2	400	6	350	0	241	0	324	0	0.028169	0.0147783	0	0	0	0.192412	0.0214737	0
CK2ßtes-Y	176	G	G	A	S	N	N	70	1	404	3	354	0	244	0	327	1	0.0140845	0.00737101	0	0	0.00304878	0.187838	0.0097115	0
CK2ßtes-Y	177	T	T	A	S	R	N	66	5	388	24	163	189	149	88	228	99	0.0704225	0.0582524	0.536932	0.371308	0.302752	0.0385956	-0.339327	1
CK2ßtes-Y	181	T	T	C	L	L	S	70	1	405	3	359	0	244	1	328	0	0.0140845	0.00735294	0	0.00408163	0	0.182012	0.00935818	0
CK2ßtes-Y	183	G	G	C	L	F	N	70	1	406	1	358	0	248	0	323	0	0.0140845	0.002457	0	0	0	0.39005	0.00827075	0
CK2ßtes-Y	184	G	G	C	D	H	N	69	1	402	2	358	0	247	0	321	0	0.0142857	0.0049505	0	0	0	0.287634	0.0096181	0
CK2ßtes-Y	185	A	A	G	D	G	N	68	2	380	14	353	2	243	3	317	4	0.0285714	0.035533	0.0056338	0.0121951	0.0124611	0.0402932	0.0219556	0
CK2ßtes-Y	186	C	C	T	D	D	S	65	5	382	26	353	4	241	5	316	6	0.0714286	0.0637255	0.0112045	0.0203252	0.0186335	0.0079313	0.050856	0
CK2ßtes-Y	188	G	G	T	W	L	N	68	2	391	10	359	3	250	3	318	3	0.0285714	0.0249377	0.00828729	0.0118577	0.00934579	0.0238305	0.0169243	0
CK2ßtes-Y	189	G	G	T	W	C	N	68	2	390	8	359	3	252	3	318	3	0.0285714	0.0201005	0.00828729	0.0117647	0.00934579	0.163802	0.0145367	0
CK2ßtes-Y	191	T	T	C	V	A	N	69	1	393	1	354	0	252	0	316	0	0.0142857	0.00253807	0	0	0	0.388063	0.00841189	0
CK2ßtes-Y	193	T	T	G	F	V	N	67	4	368	35	327	26	232	21	302	22	0.056338	0.0868486	0.0736544	0.083004	0.0679012	0.867208	-0.00325986	0
CK2ßtes-Y	194	T	T	C	F	S	N	70	1	402	0	353	0	251	1	323	1	0.0140845	0	0	0.00396825	0.00308642	0.625135	0.0046907	0
CK2ßtes-Y	195	C	C	T	F	F	S	68	3	402	4	355	0	254	0	330	0	0.0422535	0.00985222	0	0	0	0.354166	0.0260529	0
CK2ßtes-Y	197	G	G	C	G	A	N	70	1	402	5	353	0	258	0	327	0	0.0140845	0.012285	0	0	0	0.0433766	0.0131848	0
CK2ßtes-Y	205	G	G	A	E	K	N	70	1	410	3	328	12	240	16	306	24	0.0140845	0.00726392	0.0352941	0.0625	0.0727273	0.0446191	-0.0461662	0
CK2ßtes-Y	207	G	G	T	E	D	N	69	2	399	8	317	28	241	18	301	27	0.028169	0.019656	0.0811594	0.0694981	0.0823171	0.00488283	-0.0537457	0
CK2ßtes-Y	209	A	A	T	K	M	N	70	1	400	4	344	0	252	0	327	0	0.0140845	0.00990099	0	0	0	0.109933	0.0119927	0
CK2ßtes-Y	211	T	T	C	W	R	N	69	1	398	3	346	0	253	0	325	0	0.0142857	0.0074813	0	0	0	0.192882	0.0108835	0
CK2ßtes-Y	212	G	G	T	W	L	N	69	1	401	0	347	0	251	0	328	0	0.0142857	0	0	0	0	0.5	0.00714286	0
CK2ßtes-Y	216	C	C	A	Y	STOP	N	65	2	379	15	326	2	247	0	321	1	0.0298507	0.0380711	0.00609756	0	0.00310559	0.0492035	0.0308932	0
CK2ßtes-Y	218	G	G	A	G	D	N	67	1	391	0	328	0	252	0	324	0	0.0147059	0	0	0	0	0.5	0.00735294	0
CK2ßtes-Y	226	C	C	T	H	Y	N	61	10	333	52	308	10	229	15	302	13	0.140845	0.135065	0.0314465	0.0614754	0.0412698	0.0051864	0.0932244	1
CK2ßtes-Y	227	A	C	A	H	P	N	44	23	274	95	227	81	157	75	216	90	0.343284	0.257453	0.262987	0.323276	0.294118	0.900723	0.0069079	0
CK2ßtes-Y	228	C	C	T	H	H	S	66	5	371	17	177	135	161	74	226	81	0.0704225	0.0438144	0.432692	0.314894	0.263844	0.0244447	-0.280025	1
CK2ßtes-Y	229	G	G	A	A	T	N	65	6	344	44	296	16	220	15	285	27	0.084507	0.113402	0.0512821	0.0638298	0.0865385	0.214625	0.0317378	0
CK2ßtes-Y	230	C	C	T	A	V	N	68	1	381	0	308	0	231	0	302	1	0.0144928	0	0	0	0.00330033	0.550672	0.00614627	0
CK2ßtes-Y	231	C	C	G	A	A	S	69	1	392	2	307	0	233	0	309	0	0.0142857	0.00507614	0	0	0	0.282648	0.00968093	0
CK2ßtes-Y	232	C	C	T	R	STOP	N	69	1	397	0	306	0	234	0	308	0	0.0142857	0	0	0	0	0.5	0.00714286	0
CK2ßtes-Y	236	A	A	T	Y	F	N	69	2	389	9	293	6	218	8	297	14	0.028169	0.0226131	0.0200669	0.0353982	0.0450161	0.38701	-0.00810269	0
CK2ßtes-Y	237	C	C	T	Y	Y	S	63	7	349	55	293	3	220	7	295	16	0.1	0.136139	0.0101351	0.030837	0.0514469	0.0623234	0.0872629	0
CK2ßtes-Y	241	A	A	G	M	V	N	70	1	402	0	301	0	234	0	322	0	0.0140845	0	0	0	0	0.5	0.00704225	0
CK2ßtes-Y	242	T	T	G	M	R	N	70	1	409	2	300	0	234	0	324	0	0.0140845	0.00486618	0	0	0	0.288223	0.00947534	0
CK2ßtes-Y	243	G	G	T	M	I	N	70	1	406	5	307	0	238	0	330	0	0.0140845	0.0121655	0	0	0	0.0464587	0.013125	0
CK2ßtes-Y	245	C	C	G	S	W	N	63	8	360	2	304	0	223	0	312	0	0.112676	0.00552486	0	0	0	0.468809	0.0591005	0
CK2ßtes-Y	246	G	G	T	S	S	S	65	4	384	7	301	4	228	1	311	3	0.057971	0.0179028	0.0131148	0.00436681	0.00955414	0.382656	0.028925	0
CK2ßtes-Y	247	G	G	A	E	K	N	63	8	392	0	305	0	228	0	314	0	0.112676	0	0	0	0	0.5	0.056338	0
CK2ßtes-Y	248	A	A	T	E	V	N	63	8	376	0	301	0	227	0	310	0	0.112676	0	0	0	0	0.5	0.056338	0
CK2ßtes-Y	249	G	G	A	E	E	S	73	4	312	8	280	4	205	1	286	3	0.0519481	0.025	0.0140845	0.00485437	0.0103806	0.269434	0.0287009	0
CK2ßtes-Y	250	C	A	C	R	R	S	57	22	235	82	206	64	142	55	187	83	0.278481	0.258675	0.237037	0.279188	0.307407	0.811303	-0.00596604	0
CK2ßtes-Y	255	C	C	G	G	G	S	68	7	393	19	340	4	270	1	345	3	0.0933333	0.0461165	0.0116279	0.00369004	0.00862069	0.229695	0.0617454	0
CK2ßtes-Y	256	G	G	T	V	L	N	71	4	410	7	339	4	266	1	346	3	0.0533333	0.0167866	0.0116618	0.00374532	0.00859599	0.375088	0.0270589	0
CK2ßtes-Y	257	T	T	C	V	A	N	71	4	361	48	327	8	257	8	338	10	0.0533333	0.117359	0.0238806	0.0301887	0.0287356	0.321412	0.0577447	0
CK2ßtes-Y	259	G	G	A	D	N	N	71	4	408	12	323	2	267	0	354	0	0.0533333	0.0285714	0.00615385	0	0	0.188066	0.0389011	0
CK2ßtes-Y	262	G	G	A	D	N	N	56	17	343	68	284	28	236	19	306	33	0.232877	0.16545	0.0897436	0.0745098	0.0973451	0.174656	0.111964	0
CK2ßtes-Y	267	G	G	A	M	I	N	69	2	386	9	232	26	192	37	273	38	0.028169	0.0227848	0.100775	0.161572	0.122186	0.0265591	-0.102701	1
CK2ßtes-Y	268	C	C	T	R	C	N	70	1	394	4	258	0	233	1	308	5	0.0140845	0.0100503	0	0.0042735	0.0159744	0.390391	0.00531806	0
CK2ßtes-Y	269	G	G	A	R	H	N	64	7	377	21	255	4	239	1	315	4	0.0985915	0.0527638	0.015444	0.00416667	0.0125392	0.209525	0.0649611	0
CK2ßtes-Y	270	C	C	A	R	R	S	70	1	389	5	257	1	240	2	316	3	0.0140845	0.0126904	0.00387597	0.00826446	0.00940439	0.0527656	0.00620582	0
CK2ßtes-Y	271	C	C	T	Q	STOP	N	70	1	393	1	261	0	245	0	318	0	0.0140845	0.00253807	0	0	0	0.386497	0.00831129	0
CK2ßtes-Y	272	A	A	T	Q	L	N	70	1	391	0	261	0	243	0	316	0	0.0140845	0	0	0	0	0.5	0.00704225	0
CK2ßtes-Y	280	G	G	A	E	K	N	69	2	385	5	242	23	211	34	286	35	0.028169	0.0128205	0.0867925	0.138776	0.109034	0.0149804	-0.0910393	1
CK2ßtes-Y	282	G	G	C	E	D	N	69	2	370	13	268	1	240	5	314	4	0.028169	0.0339426	0.00371747	0.0204082	0.0125786	0.0455057	0.018821	0
CK2ßtes-Y	284	G	G	A	R	K	N	69	2	372	4	245	20	207	34	277	35	0.028169	0.0106383	0.0754717	0.141079	0.112179	0.0283858	-0.090173	1
CK2ßtes-Y	286	G	G	T	G	W	N	69	2	371	5	260	6	237	5	308	6	0.028169	0.0132979	0.0225564	0.0206612	0.0191083	0.996426	-4.18329e-05	0
CK2ßtes-Y	287	G	G	A	G	E	N	66	3	349	16	263	3	228	1	300	0	0.0434783	0.0438356	0.0112782	0.00436681	0	0.00708303	0.0384419	0
CK2ßtes-Y	288	G	G	C	G	G	S	66	5	362	15	263	7	236	5	305	7	0.0704225	0.0397878	0.0259259	0.0207469	0.0224359	0.281071	0.0320689	0
CK2ßtes-Y	289	G	G	C	D	H	N	70	1	366	1	252	0	224	0	305	0	0.0140845	0.0027248	0	0	0	0.378342	0.00840465	0
CK2ßtes-Y	290	A	A	C	D	A	N	69	2	354	14	234	10	201	13	281	19	0.028169	0.0380435	0.0409836	0.0607477	0.0633333	0.0843795	-0.0219153	0
CK2ßtes-Y	291	C	C	T	D	D	S	71	2	379	3	258	2	221	0	310	0	0.0273973	0.0078534	0.00769231	0	0	0.35407	0.0150612	0
CK2ßtes-Y	292	T	T	A	F	I	N	73	1	367	13	258	3	220	1	303	0	0.0135135	0.0342105	0.0114943	0.00452489	0	0.303922	0.0185223	0
CK2ßtes-Y	294	C	C	T	F	F	S	66	8	351	30	248	15	213	14	278	24	0.108108	0.0787402	0.0570342	0.061674	0.0794702	0.27803	0.0273647	0
CK2ßtes-Y	295	G	G	C	E	Q	N	73	1	394	1	265	0	231	0	306	0	0.0135135	0.00253165	0	0	0	0.382101	0.00802258	0
CK2ßtes-Y	296	A	A	G	E	G	N	73	1	391	1	267	1	229	0	305	0	0.0135135	0.00255102	0.00373134	0	0	0.425414	0.00678849	0
CK2ßtes-Y	297	A	A	G	E	E	S	73	2	394	5	261	18	211	28	286	29	0.0266667	0.0125313	0.0645161	0.117155	0.0920635	0.0288669	-0.0716458	0
CK2ßtes-Y	298	G	G	T	V	L	N	74	1	398	0	278	0	239	0	316	0	0.0133333	0	0	0	0	0.5	0.00666667	0
CK2ßtes-Y	299	T	T	A	V	E	N	74	1	400	0	276	0	239	0	314	0	0.0133333	0	0	0	0	0.5	0.00666667	0
CK2ßtes-Y	309	G	G	A	K	K	S	74	1	391	3	284	7	228	11	319	10	0.0133333	0.00761421	0.024055	0.0460251	0.0303951	0.0574928	-0.023018	0
CK2ßtes-Y	313	T	T	A	S	T	N	73	2	381	4	273	16	213	26	308	25	0.0266667	0.0103896	0.0553633	0.108787	0.0750751	0.044129	-0.0612135	0
CK2ßtes-Y	315	C	C	T	S	S	S	73	2	399	5	283	4	237	5	325	8	0.0266667	0.0123762	0.0139373	0.0206612	0.024024	0.99832	-1.93689e-05	0
CK2ßtes-Y	316	T	T	A	C	S	N	73	2	390	5	266	15	217	25	308	25	0.0266667	0.0126582	0.0533808	0.103306	0.0750751	0.0427986	-0.0575914	0
CK2ßtes-Y	317	G	G	A	C	Y	N	73	2	398	4	267	15	216	25	309	24	0.0266667	0.00995025	0.0531915	0.103734	0.0720721	0.0440865	-0.0580242	0
CK2ßtes-Y	319	A	A	T	R	W	N	74	1	390	4	274	7	240	2	330	0	0.0133333	0.0101523	0.024911	0.00826446	0	0.934959	0.000684311	0
CK2ßtes-Y	320	G	G	T	R	M	N	74	1	397	0	280	2	240	1	328	1	0.0133333	0	0.0070922	0.00414938	0.00303951	0.823133	0.0019063	0
CK2ßtes-Y	321	G	G	A	R	R	S	72	2	389	12	270	12	222	17	296	27	0.027027	0.0299252	0.0425532	0.0711297	0.0835913	0.0897768	-0.037282	0
CK2ßtes-Y	322	C	C	T	Q	STOP	N	73	2	393	5	269	15	212	25	293	26	0.0266667	0.0125628	0.0528169	0.105485	0.0815047	0.0436772	-0.0603209	0
CK2ßtes-Y	325	A	A	T	K	STOP	N	73	1	380	1	290	0	241	0	325	0	0.0135135	0.00262467	0	0	0	0.377873	0.00806909	0
CK2ßtes-Y	328	A	A	G	T	A	N	56	17	298	78	256	30	221	19	292	32	0.232877	0.207447	0.104895	0.0791667	0.0987654	0.019815	0.125886	1
CK2ßtes-Y	329	C	C	T	T	I	N	69	5	377	22	282	10	232	9	327	11	0.0675676	0.0551378	0.0342466	0.0373444	0.0325444	0.131391	0.0266409	0
CK2ßtes-Y	331	C	C	A	L	I	N	72	2	388	4	287	2	239	0	331	0	0.027027	0.0102041	0.00692042	0	0	0.286462	0.0163087	0
CK2ßtes-Y	332	T	T	C	L	P	N	71	1	377	2	284	0	230	0	329	0	0.0138889	0.00527704	0	0	0	0.268843	0.00958297	0
CK2ßtes-Y	333	T	T	G	L	L	S	54	19	301	84	252	35	213	19	300	32	0.260274	0.218182	0.121951	0.0818966	0.0963855	0.0444445	0.13915	1
CK2ßtes-Y	334	C	C	T	P	S	N	60	9	342	51	226	49	171	59	254	72	0.130435	0.129771	0.178182	0.256522	0.220859	0.0597434	-0.0884179	0
CK2ßtes-Y	335	C	C	T	P	L	N	70	2	405	0	285	1	218	0	336	0	0.0277778	0	0.0034965	0	0	0.527266	0.0127234	0
CK2ßtes-Y	336	T	T	G	P	P	S	69	4	371	5	284	2	215	0	333	0	0.0547945	0.0132979	0.00699301	0	0	0.366287	0.0317152	0
CK2ßtes-Y	337	G	G	T	V	L	N	67	4	374	1	288	0	216	1	342	0	0.056338	0.00266667	0	0.00460829	0	0.486496	0.0279662	0
CK2ßtes-Y	338	T	T	A	V	E	N	69	2	329	16	184	9	156	5	244	13	0.028169	0.0463768	0.0466321	0.0310559	0.0505837	0.66735	-0.00548431	0
CK2ßtes-Y	342	C	C	A	G	G	S	67	2	416	2	265	3	196	0	300	0	0.0289855	0.00478469	0.011194	0	0	0.464603	0.0131538	0
CK2ßtes-Y	344	C	C	T	P	L	N	60	9	372	41	159	106	141	55	220	78	0.130435	0.0992736	0.4	0.280612	0.261745	0.0334027	-0.199265	1
CK2ßtes-Y	348	C	C	A	S	R	N	67	3	417	6	267	1	200	0	306	0	0.0428571	0.0141844	0.00373134	0	0	0.3062	0.027277	0
CK2ßtes-Y	350	A	A	G	D	G	N	69	1	416	5	264	0	198	0	298	1	0.0142857	0.0118765	0	0	0.00334448	0.00933439	0.0119663	0
CK2ßtes-Y	352	G	G	A	V	M	N	67	3	417	8	264	2	196	0	295	0	0.0428571	0.0188235	0.0075188	0	0	0.243857	0.0283341	0
CK2ßtes-Y	357	G	T	G	W	C	N	57	13	329	80	224	22	164	14	246	24	0.185714	0.195599	0.0894309	0.0786517	0.0888889	0.0032719	0.104999	1
CK2ßtes-Y	359	G	G	T	G	V	N	59	11	344	74	229	20	169	14	264	24	0.157143	0.177033	0.0803213	0.0765027	0.0833333	0.0632538	0.0870357	0
CK2ßtes-Y	360	C	C	T	G	G	S	69	1	429	7	252	1	192	0	294	3	0.0142857	0.016055	0.00395257	0	0.010101	0.0607362	0.0104859	0
CK2ßtes-Y	361	A	A	T	K	STOP	N	68	2	429	2	248	1	185	0	291	0	0.0285714	0.00464037	0.00401606	0	0	0.421217	0.0152672	0
CK2ßtes-Y	363	G	G	T	K	N	N	69	1	409	5	233	11	167	10	261	22	0.0142857	0.0120773	0.045082	0.0564972	0.0777385	0.0381477	-0.046591	0
CK2ßtes-Y	365	C	C	A	S	Y	N	68	2	412	22	244	0	183	1	288	1	0.0285714	0.0506912	0	0.00543478	0.00346021	0.180316	0.0366663	0
CK2ßtes-Y	369	C	C	G	N	K	N	69	1	423	12	243	2	183	0	290	2	0.0142857	0.0275862	0.00816327	0	0.00684932	0.219201	0.0159318	0
CK2ßtes-Y	370	G	G	A	V	M	N	69	1	428	7	236	1	181	0	286	0	0.0142857	0.016092	0.00421941	0	0	0.0038425	0.0137824	0
CK2ßtes-Y	375	G	A	G	K	K	S	50	20	270	121	178	55	133	45	212	71	0.285714	0.309463	0.236052	0.252809	0.250883	0.100996	0.0510073	0
CK2ßtes-Y	376	A	A	T	I	F	N	66	4	380	16	232	0	176	2	285	1	0.0571429	0.040404	0	0.011236	0.0034965	0.0839662	0.0438626	0
CK2ßtes-Y	378	C	C	A	I	I	S	68	2	416	4	236	1	187	0	296	0	0.0285714	0.00952381	0.00421941	0	0	0.309992	0.0176411	0
CK2ßtes-Y	381	C	C	T	F	F	S	69	1	413	3	238	0	187	0	295	0	0.0142857	0.00721154	0	0	0	0.202389	0.0107486	0
CK2ßtes-Y	385	C	C	T	P	S	N	54	13	331	71	204	25	154	31	241	37	0.19403	0.176617	0.10917	0.167568	0.133094	0.0892825	0.0487129	0
CK2ßtes-Y	388	C	C	T	R	C	N	67	1	411	2	221	3	180	4	267	5	0.0147059	0.00484262	0.0133929	0.0217391	0.0183824	0.317362	-0.00806386	0
CK2ßtes-Y	389	G	G	A	R	H	N	64	4	391	13	222	0	180	2	273	1	0.0588235	0.0321782	0	0.010989	0.00364964	0.185334	0.0406213	0
CK2ßtes-Y	394	A	A	T	N	Y	N	61	9	346	56	215	33	162	48	249	64	0.128571	0.139303	0.133065	0.228571	0.204473	0.193071	-0.0547655	0
CK2ßtes-Y	396	C	C	T	N	N	S	67	2	397	8	250	0	210	3	307	2	0.0289855	0.0197531	0	0.0140845	0.00647249	0.0837144	0.017517	0
CK2ßtes-Y	404	A	A	T	Y	F	N	58	1	335	4	224	3	185	0	274	0	0.0169492	0.0117994	0.0132159	0	0	0.148297	0.00996899	0
CK2ßtes-Y	412	C	C	A	R	R	S	58	1	335	7	209	8	170	9	240	19	0.0169492	0.0204678	0.0368664	0.0502793	0.0733591	0.07874	-0.0347931	0
CK2ßtes-Y	420	T	T	G	D	E	N	58	1	343	4	212	0	175	0	256	0	0.0169492	0.0115274	0	0	0	0.119775	0.0142383	0
CK2ßtes-Y	421	A	A	G	T	A	N	50	9	285	64	181	26	120	43	185	60	0.152542	0.183381	0.125604	0.263804	0.244898	0.427248	-0.0434734	0
CK2ßtes-Y	422	C	C	A	T	K	N	58	1	337	11	213	2	160	6	235	12	0.0169492	0.0316092	0.00930233	0.0361446	0.048583	0.642367	-0.00706413	0
CK2ßtes-Y	423	A	A	C	T	T	S	57	2	327	21	214	0	164	0	244	2	0.0338983	0.0603448	0	0	0.00813008	0.172043	0.0444115	0
CK2ßtes-Y	429	G	G	A	L	L	S	59	9	304	65	186	29	121	44	189	59	0.132353	0.176152	0.134884	0.266667	0.237903	0.290905	-0.0588989	0
CK2ßtes-Y	434	G	G	C	G	A	N	69	4	365	22	209	8	156	8	243	11	0.0547945	0.0568475	0.0368664	0.0487805	0.0433071	0.0556466	0.0128364	0
CK2ßtes-Y	437	C	C	T	A	V	N	71	2	371	16	220	2	155	0	238	5	0.0273973	0.0413437	0.00900901	0	0.0205761	0.0974393	0.0245088	0
CK2ßtes-Y	441	G	G	T	M	I	N	72	1	372	7	199	1	145	0	217	4	0.0136986	0.0184697	0.005	0	0.0180995	0.261434	0.00838429	0
CK2ßtes-Y	444	C	C	T	F	F	S	70	1	375	8	194	1	146	1	220	0	0.0140845	0.0208877	0.00512821	0.00680272	0	0.0925704	0.0135091	0
CK2ßtes-Y	447	G	G	T	G	G	S	68	3	366	10	184	6	147	1	211	4	0.0422535	0.0265957	0.0315789	0.00675676	0.0186047	0.258665	0.0154445	0
CK2ßtes-Y	448	A	A	T	T	S	N	70	3	378	10	189	6	138	1	228	4	0.0410959	0.0257732	0.0307692	0.00719424	0.0172414	0.258445	0.0150329	0
CK2ßtes-Y	453	C	C	T	S	S	S	72	2	381	15	175	29	122	18	197	36	0.027027	0.0378788	0.142157	0.128571	0.154506	0.00130595	-0.109292	1
CK2ßtes-Y	455	T	T	G	F	C	N	72	2	378	15	205	1	143	0	228	3	0.027027	0.0381679	0.00485437	0	0.012987	0.0617163	0.0266504	0
CK2ßtes-Y	456	C	C	T	F	F	S	69	3	374	4	205	0	144	0	227	0	0.0416667	0.010582	0	0	0	0.341666	0.0261243	0
CK2ßtes-Y	457	T	T	C	S	P	N	73	1	383	4	206	0	140	4	231	4	0.0135135	0.0103359	0	0.0277778	0.0170213	0.74788	-0.0030083	0
CK2ßtes-Y	458	C	C	T	S	L	N	73	1	401	1	205	2	144	2	226	6	0.0135135	0.00248756	0.00966184	0.0136986	0.0258621	0.353107	-0.00840697	0
CK2ßtes-Y	459	G	G	A	S	S	S	69	3	386	11	191	3	139	1	211	3	0.0416667	0.0277078	0.0154639	0.00714286	0.0140187	0.157953	0.0224787	0
CK2ßtes-Y	462	C	C	A	H	Q	N	72	2	396	10	190	12	141	10	208	15	0.027027	0.0246305	0.0594059	0.0662252	0.0672646	0.00121929	-0.0384698	0
CK2ßtes-Y	467	T	T	C	F	S	N	72	2	397	3	198	7	149	5	218	10	0.027027	0.0075	0.0341463	0.0324675	0.0438596	0.267615	-0.019561	0
CK2ßtes-Y	469	T	T	A	F	I	N	73	1	382	8	209	1	155	0	227	0	0.0135135	0.0205128	0.0047619	0	0	0.0965364	0.0154259	0
CK2ßtes-Y	471	C	C	A	F	L	N	63	7	366	30	167	36	110	24	158	43	0.1	0.0757576	0.17734	0.179104	0.21393	0.0131909	-0.102246	1
CK2ßtes-Y	472	G	G	T	A	S	N	72	1	394	6	212	0	137	0	210	1	0.0136986	0.015	0	0	0.00473934	0.00810058	0.0127695	0
CK2ßtes-Y	475	C	C	A	Q	K	N	70	3	397	6	210	0	140	0	214	0	0.0410959	0.0148883	0	0	0	0.278727	0.0279921	0
CK2ßtes-Y	476	A	A	G	Q	R	N	72	1	388	11	209	0	139	0	211	1	0.0136986	0.0275689	0	0	0.00471698	0.207951	0.0190614	0
CK2ßtes-Y	477	G	G	A	Q	Q	S	70	2	386	12	203	3	137	3	211	1	0.0277778	0.0301508	0.0145631	0.0214286	0.00471698	0.0793602	0.0153947	0
CK2ßtes-Y	478	C	C	T	R	W	N	66	7	371	33	170	37	117	22	167	42	0.0958904	0.0816832	0.178744	0.158273	0.200957	0.00861774	-0.090538	1
CK2ßtes-Y	479	G	G	T	R	L	N	70	3	387	17	204	2	138	3	206	3	0.0410959	0.0420792	0.00970874	0.0212766	0.0143541	0.0142542	0.0264744	0
CK2ßtes-Y	482	C	C	T	P	L	N	69	3	398	6	206	2	148	0	215	2	0.0416667	0.0148515	0.00961538	0	0.00921659	0.337821	0.0219818	0
CK2ßtes-Y	483	G	G	T	P	P	S	70	2	394	8	194	13	139	6	198	16	0.0277778	0.0199005	0.0628019	0.0413793	0.0747664	0.053557	-0.0358101	0
CK2ßtes-Y	486	C	C	T	N	N	S	73	2	345	12	221	3	146	2	206	7	0.0266667	0.0336134	0.0133929	0.0135135	0.0328638	0.262955	0.0102166	0
CK2ßtes-Y	489	G	G	A	L	L	S	66	1	356	8	229	1	151	0	213	0	0.0149254	0.021978	0.00434783	0	0	0.0913531	0.0170024	0
CK2ßtes-Y	494	C	C	T	P	L	N	62	6	358	18	219	2	148	3	200	3	0.0882353	0.0478723	0.00904977	0.0198675	0.0147783	0.222836	0.0534886	0
CK2ßtes-Y	495	C	C	A	P	P	S	71	4	376	42	212	13	143	9	192	12	0.0533333	0.100478	0.0577778	0.0592105	0.0588235	0.579692	0.018302	0
CK2ßtes-Y	496	C	C	A	Q	K	N	73	2	418	6	221	4	149	4	200	4	0.0266667	0.0141509	0.0177778	0.0261438	0.0196078	0.924139	-0.000767666	0
CK2ßtes-Y	502	C	C	A	P	T	N	70	3	407	11	213	9	140	12	176	13	0.0410959	0.0263158	0.0405405	0.0789474	0.0687831	0.124078	-0.0290512	0
CK2ßtes-Y	504	C	C	A	P	P	S	65	8	382	49	158	40	117	23	137	26	0.109589	0.113689	0.20202	0.164286	0.159509	0.0392123	-0.0636326	0
CK2ßtes-Y	505	C	C	A	L	M	N	73	2	432	5	221	3	159	2	189	1	0.0266667	0.0114416	0.0133929	0.0124224	0.00526316	0.446701	0.0086947	0
CK2ßtes-Y	507	G	G	A	L	L	S	73	2	434	5	220	2	158	6	184	8	0.0266667	0.0113895	0.00900901	0.0365854	0.0416667	0.486368	-0.0100589	0
CK2ßtes-Y	508	G	G	T	D	Y	N	74	1	440	3	219	1	164	0	191	1	0.0133333	0.00677201	0.00454545	0	0.00520833	0.243688	0.00680141	0
CK2ßtes-Y	514	C	C	G	P	A	N	72	1	424	2	204	0	149	0	173	0	0.0136986	0.00469484	0	0	0	0.289803	0.00919673	0
CK2ßtes-Y	515	C	C	A	P	H	N	41	30	214	195	134	21	83	26	98	14	0.422535	0.476773	0.135484	0.238532	0.125	0.00829586	0.283315	1
CK2ßtes-Y	517	C	C	T	R	W	N	71	1	423	7	124	0	114	1	114	2	0.0138889	0.0162791	0	0.00869565	0.0172414	0.324452	0.0064383	0
CK2ßtes-Y	518	G	G	A	R	Q	N	71	1	426	2	97	2	94	0	94	1	0.0138889	0.0046729	0.020202	0	0.0105263	0.905325	-0.000961886	0
CK2ßtes-Y	522	A	A	G	STOP	STOP	S	69	4	396	28	57	8	64	7	66	8	0.0547945	0.0660377	0.123077	0.0985915	0.108108	0.0124669	-0.0495094	0
CK2ßtes-Y	523	G	G	T	UTR	UTR	UTR	69	4	399	31	57	8	64	7	68	8	0.0547945	0.072093	0.123077	0.0985915	0.105263	0.0433007	-0.0455334	0
CK2ßtes-Y	530	T	T	G	UTR	UTR	UTR	69	6	402	47	54	10	67	9	66	18	0.08	0.104677	0.15625	0.118421	0.214286	0.114641	-0.0706471	0
CK2ßtes-Y	538	T	T	C	UTR	UTR	UTR	74	1	444	4	63	1	68	7	73	15	0.0133333	0.00892857	0.015625	0.0933333	0.170455	0.207717	-0.0820067	0
CK2ßtes-Y	540	G	G	T	UTR	UTR	UTR	71	2	433	4	63	3	81	0	88	0	0.0273973	0.00915332	0.0454545	0	0	0.871264	0.00312377	0
CK2ßtes-Y	545	G	G	T	UTR	UTR	UTR	37	37	269	169	24	41	54	33	58	36	0.5	0.385845	0.630769	0.37931	0.382979	0.845437	-0.0214304	0
CK2ßtes-Y	546	G	G	T	UTR	UTR	UTR	73	2	435	5	64	6	87	3	98	3	0.0266667	0.0113636	0.0857143	0.0333333	0.029703	0.230646	-0.0305684	0
CK2ßtes-Y	549	A	C	T	UTR	UTR	UTR	67	6	363	56	70	0	83	3	91	2	0.0821918	0.133652	0	0.0348837	0.0215054	0.141079	0.0891253	0
CK2ßtes-Y	555	T	T	C	UTR	UTR	UTR	74	1	431	8	73	1	82	5	96	3	0.0133333	0.0182232	0.0135135	0.0574713	0.030303	0.294089	-0.0179843	0
CK2ßtes-Y	561	A	A	G	UTR	UTR	UTR	74	1	413	9	73	0	89	0	103	0	0.0133333	0.021327	0	0	0	0.1443	0.0173302	0
CK2ßtes-Y	562	A	A	G	UTR	UTR	UTR	62	13	324	92	68	5	79	11	94	7	0.173333	0.221154	0.0684932	0.122222	0.0693069	0.0611859	0.110569	0
CK2ßtes-Y	563	G	G	A	UTR	UTR	UTR	72	2	401	6	72	4	89	3	95	7	0.027027	0.014742	0.0526316	0.0326087	0.0686275	0.0888003	-0.0304047	0
CK2ßtes-Y	564	C	C	T	UTR	UTR	UTR	68	6	402	16	75	2	91	1	102	2	0.0810811	0.0382775	0.025974	0.0108696	0.0192308	0.296609	0.0409878	0
CK2ßtes-Y	565	G	G	A	UTR	UTR	UTR	74	1	408	7	76	2	92	3	104	0	0.0133333	0.0168675	0.025641	0.0315789	0	0.723584	-0.00397292	0
CK2ßtes-Y	566	C	C	T	UTR	UTR	UTR	71	2	392	2	77	3	92	0	103	2	0.0273973	0.00507614	0.0375	0	0.0190476	0.878715	-0.00261251	0
CK2ßtes-Y	567	T	T	C	UTR	UTR	UTR	69	5	373	29	79	2	93	2	105	2	0.0675676	0.0721393	0.0246914	0.0210526	0.0186916	0.00259218	0.0483749	0
CK2ßtes-Y	569	G	G	T	UTR	UTR	UTR	74	2	410	15	82	0	91	3	106	3	0.0263158	0.0352941	0	0.0319149	0.0275229	0.39751	0.0109923	0
CK2ßtes-Y	572	T	T	C	UTR	UTR	UTR	75	1	409	9	78	1	93	1	109	0	0.0131579	0.0215311	0.0126582	0.0106383	0	0.209621	0.00957899	0
CK2ßtes-Y	573	T	T	C	UTR	UTR	UTR	75	1	414	3	76	2	92	3	109	1	0.0131579	0.00719424	0.025641	0.0315789	0.00909091	0.215017	-0.0119276	0
CK2ßtes-Y	574	T	T	G	UTR	UTR	UTR	75	1	418	3	79	0	95	0	110	0	0.0131579	0.00712589	0	0	0	0.184016	0.0101419	0
CK2ßtes-Y	575	G	G	C	UTR	UTR	UTR	75	1	420	0	87	0	98	0	115	0	0.0131579	0	0	0	0	0.5	0.00657895	0
CK2ßtes-Y	576	C	C	A	UTR	UTR	UTR	75	1	414	1	87	0	96	1	117	0	0.0131579	0.00240964	0	0.0103093	0	0.571427	0.00434734	0
CK2ßtes-Y	578	G	G	A	UTR	UTR	UTR	75	1	419	0	177	0	178	0	227	0	0.0131579	0	0	0	0	0.5	0.00657895	0
CK2ßtes-Y	580	C	C	T	UTR	UTR	UTR	73	2	388	15	222	0	173	3	229	3	0.0266667	0.0372208	0	0.0170455	0.012931	0.069459	0.0219516	0
CK2ßtes-Y	581	T	T	A	UTR	UTR	UTR	69	2	378	16	216	0	166	3	220	3	0.028169	0.0406091	0	0.0177515	0.0134529	0.0813465	0.0239876	0
CK2ßtes-Y	583	T	T	C	UTR	UTR	UTR	73	3	398	12	226	3	189	5	251	1	0.0394737	0.0292683	0.0131004	0.0257732	0.00396825	0.0912665	0.0200904	0
CK2ßtes-Y	590	T	T	A	UTR	UTR	UTR	71	6	401	13	229	3	187	4	258	3	0.0779221	0.031401	0.012931	0.0209424	0.0114943	0.334994	0.039539	0
CK2ßtes-Y	591	C	C	T	UTR	UTR	UTR	78	1	414	10	233	3	193	3	262	0	0.0126582	0.0235849	0.0127119	0.0153061	0	0.3306	0.00878224	0
CK2ßtes-Y	592	C	C	T	UTR	UTR	UTR	70	10	366	62	221	16	182	15	246	20	0.125	0.14486	0.0675105	0.0761421	0.075188	0.082287	0.061983	0
CK2ßtes-Y	593	G	G	T	UTR	UTR	UTR	79	1	425	8	240	0	198	0	270	0	0.0125	0.0184758	0	0	0	0.121324	0.0154879	0
CK2ßtes-Y	594	G	G	T	UTR	UTR	UTR	71	6	401	18	236	3	187	4	256	3	0.0779221	0.0429594	0.0125523	0.0209424	0.011583	0.225786	0.0454148	0
CK2ßtes-Y	597	T	T	G	UTR	UTR	UTR	79	1	425	6	249	0	199	0	271	0	0.0125	0.0139211	0	0	0	0.0342089	0.0132106	0
CK2ßtes-Y	598	T	T	A	UTR	UTR	UTR	72	6	407	18	217	3	185	4	253	3	0.0769231	0.0423529	0.0136364	0.021164	0.0117188	0.229855	0.0441316	0
CK2ßtes-Y	599	T	T	A	UTR	UTR	UTR	78	1	422	8	250	0	197	4	267	7	0.0126582	0.0186047	0	0.0199005	0.0255474	0.957959	0.000482125	0
CK2ßtes-Y	601	C	C	T	UTR	UTR	UTR	74	6	390	51	235	23	177	29	240	41	0.075	0.115646	0.0891473	0.140777	0.145907	0.367616	-0.029954	0
CK2ßtes-Y	607	G	G	T	UTR	UTR	UTR	69	8	407	21	246	4	193	4	275	7	0.103896	0.0490654	0.016	0.0203046	0.0248227	0.287114	0.056105	0
CK2ßtes-Y	610	C	C	A	UTR	UTR	UTR	79	2	448	4	267	0	209	0	301	0	0.0246914	0.00884956	0	0	0	0.280911	0.0167705	0
CK2ßtes-Y	613	G	G	A	UTR	UTR	UTR	80	1	435	6	263	2	203	3	286	9	0.0123457	0.0136054	0.00754717	0.0145631	0.0305085	0.571384	-0.00456402	0
CK2ßtes-Y	614	A	A	T	UTR	UTR	UTR	74	7	382	57	256	7	197	8	287	8	0.0864198	0.129841	0.026616	0.0390244	0.0271186	0.164236	0.0772105	0
CK2ßtes-Y	619	G	G	A	UTR	UTR	UTR	78	2	432	10	197	66	180	24	249	44	0.025	0.0226244	0.250951	0.117647	0.150171	0.0652744	-0.149111	0
CK2ßtes-Y	623	G	G	T	UTR	UTR	UTR	78	2	443	11	241	8	182	6	253	10	0.025	0.0242291	0.0321285	0.0319149	0.0380228	0.0383395	-0.00940754	0
CK2ßtes-Y	624	A	A	T	UTR	UTR	UTR	80	1	451	5	247	10	189	14	259	26	0.0123457	0.0109649	0.0389105	0.0689655	0.0912281	0.0686249	-0.0547127	0
CK2ßtes-Y	627	C	C	A	UTR	UTR	UTR	80	1	458	7	254	0	200	0	284	1	0.0123457	0.0150538	0	0	0.00350877	0.0121314	0.0125301	0
CK2ßtes-Y	628	G	G	T	UTR	UTR	UTR	78	3	441	21	241	12	194	8	273	13	0.037037	0.0454545	0.0474308	0.039604	0.0454545	0.617996	-0.00291732	0
CK2ßtes-Y	630	C	C	A	UTR	UTR	UTR	78	2	453	9	246	5	195	8	277	5	0.025	0.0194805	0.0199203	0.0394089	0.0177305	0.678984	-0.0034463	0
CK2ßtes-Y	631	C	C	T	UTR	UTR	UTR	77	4	426	43	226	18	187	19	260	22	0.0493827	0.0916844	0.0737705	0.092233	0.0780142	0.699512	-0.0108057	0
CK2ßtes-Y	632	G	G	C	UTR	UTR	UTR	80	1	456	6	239	2	201	3	276	3	0.0123457	0.012987	0.00829876	0.0147059	0.0107527	0.529389	0.0014139	0
CK2ßtes-Y	635	T	T	A	UTR	UTR	UTR	80	1	449	5	239	0	198	0	277	0	0.0123457	0.0110132	0	0	0	0.0362754	0.0116794	0
CK2ßtes-Y	636	C	C	T	UTR	UTR	UTR	78	3	444	21	178	60	170	28	237	45	0.037037	0.0451613	0.252101	0.141414	0.159574	0.0509509	-0.143264	0
CK2ßtes-Y	638	T	T	C	UTR	UTR	UTR	79	2	439	18	222	8	184	9	269	13	0.0246914	0.0393873	0.0347826	0.0466321	0.0460993	0.362927	-0.0104653	0
CK2ßtes-Y	639	C	C	T	UTR	UTR	UTR	77	4	456	5	219	10	188	5	274	6	0.0493827	0.010846	0.0436681	0.0259067	0.0214286	0.992857	-0.000220125	0
CK2ßtes-Y	640	G	G	T	UTR	UTR	UTR	80	1	444	10	219	3	190	0	280	2	0.0123457	0.0220264	0.0135135	0	0.0070922	0.225066	0.0103175	0
CK2ßtes-Y	643	C	C	T	UTR	UTR	UTR	79	2	447	10	210	2	179	5	277	4	0.0246914	0.0218818	0.00943396	0.0271739	0.0142349	0.35466	0.00633901	0
CK2ßtes-Y	651	T	T	C	UTR	UTR	UTR	80	1	446	3	208	1	174	4	282	3	0.0123457	0.00668151	0.00478469	0.0224719	0.0105263	0.640922	-0.00308071	0
CK2ßtes-Y	652	C	C	G	UTR	UTR	UTR	80	1	454	1	205	3	174	5	276	11	0.0123457	0.0021978	0.0144231	0.027933	0.0383275	0.106376	-0.0196228	0
CK2ßtes-Y	656	T	T	G	UTR	UTR	UTR	79	2	448	6	188	3	166	3	263	4	0.0246914	0.0132159	0.0157068	0.0177515	0.0149813	0.710316	0.00280709	0
CK2ßtes-Y	659	T	T	C	UTR	UTR	UTR	74	7	392	51	181	5	157	10	253	8	0.0864198	0.115124	0.0268817	0.0598802	0.0306513	0.071283	0.0616342	0
CK2ßtes-Y	665	A	A	G	UTR	UTR	UTR	78	3	402	1	126	6	140	1	213	2	0.037037	0.00248139	0.0454545	0.0070922	0.00930233	0.971489	-0.000857143	0
CK2ßtes-Y	666	A	A	G	UTR	UTR	UTR	78	2	394	1	126	6	137	1	211	1	0.025	0.00253165	0.0454545	0.00724638	0.00471698	0.777284	-0.00537348	0
CK2ßtes-Y	667	C	C	T	UTR	UTR	UTR	79	1	389	0	131	0	137	0	213	1	0.0125	0	0	0	0.0046729	0.587796	0.00469237	0
Lhk-1	5	C	C	T	R	R	S	10	3	10	0	45	0	43	0	57	0	0.230769	0	0	0	0	0.5	0.115385	0
Lhk-1	8	C	C	T	Y	Y	S	11	2	12	0	79	0	64	0	87	0	0.153846	0	0	0	0	0.5	0.0769231	0
Lhk-1	9	C	C	T	H	Y	N	11	2	12	0	81	0	68	0	91	0	0.153846	0	0	0	0	0.5	0.0769231	0
Lhk-1	19	G	G	A	R	H	N	12	1	18	3	135	0	115	0	152	2	0.0769231	0.142857	0	0	0.012987	0.187525	0.105561	0
Lhk-1	30	T	T	A	W	R	N	13	1	32	2	150	6	122	3	169	7	0.0714286	0.0588235	0.0384615	0.024	0.0397727	0.0513417	0.031048	0
Lhk-1	87	G	G	C	A	P	N	13	1	79	3	296	16	218	16	373	18	0.0714286	0.0365854	0.0512821	0.0683761	0.0460358	0.956314	-0.00122434	0
Lhk-1	99	C	C	G	L	V	N	12	2	75	19	329	3	244	0	410	3	0.142857	0.202128	0.00903614	0	0.00726392	0.109254	0.167059	0
Lhk-1	120	G	G	T	A	S	N	13	1	104	6	367	0	275	0	444	0	0.0714286	0.0545455	0	0	0	0.0848148	0.062987	0
Lhk-1	133	A	A	T	E	V	N	13	1	103	9	291	33	210	30	343	46	0.0714286	0.0803571	0.101852	0.125	0.118252	0.0176862	-0.0391417	0
Lhk-1	140	G	T	G	K	N	N	9	5	75	46	69	266	53	187	86	317	0.357143	0.380165	0.79403	0.779167	0.7866	0.0074219	-0.417945	1
Lhk-1	169	C	C	T	P	L	N	13	1	75	9	256	27	166	22	285	28	0.0714286	0.107143	0.0954064	0.117021	0.0894569	0.641504	-0.0113425	0
Lhk-1	177	C	C	G	P	A	N	9	1	69	8	270	27	178	25	299	29	0.1	0.103896	0.0909091	0.123153	0.0884146	0.929813	0.00112257	0
Lhk-1	181	G	G	A	R	H	N	8	5	62	10	260	29	169	26	278	35	0.384615	0.138889	0.100346	0.133333	0.111821	0.443204	0.146585	0
Lhk-1	204	C	C	T	L	L	S	12	1	106	9	120	208	117	126	189	204	0.0769231	0.0782609	0.634146	0.518519	0.519084	0.00635157	-0.479658	1
Lhk-1	235	G	G	A	G	D	N	9	4	94	36	307	55	208	54	320	96	0.307692	0.276923	0.151934	0.206107	0.230769	0.0414421	0.0960378	1
Lhk-1	280	T	T	A	L	Q	N	13	1	141	9	433	2	294	1	472	0	0.0714286	0.06	0.0045977	0.00338983	0	0.0459767	0.0630518	0
Lhk-1	281	G	G	A	L	L	S	13	1	137	16	430	0	286	1	472	2	0.0714286	0.104575	0	0.00348432	0.00421941	0.120153	0.085434	0
Lhk-1	282	A	A	G	K	E	N	9	5	88	64	97	331	92	192	145	321	0.357143	0.421053	0.773364	0.676056	0.688841	0.00856882	-0.323656	1
Lhk-1	285	C	C	T	L	F	N	13	1	136	17	405	29	268	29	437	41	0.0714286	0.111111	0.0668203	0.0976431	0.0857741	0.76456	0.00785736	0
Lhk-1	307	G	G	T	R	L	N	13	1	148	11	463	3	326	2	511	3	0.0714286	0.0691824	0.00643777	0.00609756	0.00583658	0.0093702	0.0641815	0
Lhk-1	331	A	A	C	K	T	N	10	4	118	40	321	47	229	59	345	65	0.285714	0.253165	0.127717	0.204861	0.158537	0.0316796	0.105734	1
Lhk-1	348	G	G	T	V	L	N	13	1	135	16	341	8	262	8	348	14	0.0714286	0.10596	0.0229226	0.0296296	0.038674	0.163951	0.0582857	0
Lhk-1	349	T	T	A	V	E	N	13	1	143	9	343	4	265	5	357	7	0.0714286	0.0592105	0.0115274	0.0185185	0.0192308	0.0480182	0.048894	0
Lhk-1	383	C	C	T	C	C	S	12	1	146	7	348	2	265	2	370	1	0.0769231	0.0457516	0.00571429	0.00749064	0.00269542	0.17022	0.0560372	0
Lhk-1	391	T	T	G	I	S	N	9	4	113	41	305	53	230	55	319	55	0.307692	0.266234	0.148045	0.192982	0.147059	0.0378626	0.124268	1
Lhk-1	480	A	A	T	T	S	N	9	1	159	25	317	12	257	23	311	26	0.1	0.13587	0.0364742	0.0821429	0.0771513	0.135454	0.0526787	0
Lhk-1	506	G	G	A	T	T	S	9	1	154	25	356	12	274	24	346	30	0.1	0.139665	0.0326087	0.0805369	0.0797872	0.147013	0.0555215	0
Lhk-1	507	C	T	C	L	L	S	7	3	88	91	297	71	191	109	276	101	0.3	0.50838	0.192935	0.363333	0.267905	0.41257	0.129466	0
Lhk-1	536	A	A	G	A	A	S	9	1	137	17	366	1	273	1	369	0	0.1	0.11039	0.0027248	0.00364964	0	0.025602	0.10307	1
Lhk-1	581	C	C	T	V	V	S	10	1	156	14	455	5	303	7	424	15	0.0909091	0.0823529	0.0108696	0.0225806	0.0341686	0.00415397	0.0640914	0
Lhk-1	617	G	G	A	W	STOP	N	10	1	154	15	482	4	298	1	434	1	0.0909091	0.0887574	0.00823045	0.00334448	0.00229885	4.19872e-05	0.0852086	1
Lhk-1	662	G	A	G	R	R	S	9	4	132	58	350	39	214	38	298	54	0.307692	0.305263	0.100257	0.150794	0.153409	0.00972959	0.171658	1
Lhk-1	681	G	G	C	G	R	N	12	1	175	11	375	1	252	2	353	3	0.0769231	0.0591398	0.00265957	0.00787402	0.00842697	0.0802413	0.0617112	0
Lhk-1	699	T	T	G	S	A	N	12	1	156	8	348	1	225	0	320	0	0.0769231	0.0487805	0.00286533	0	0	0.140899	0.0618967	0
Lhk-1	700	C	C	T	S	L	N	11	2	153	14	57	291	77	149	115	205	0.153846	0.0838323	0.836207	0.659292	0.640625	0.00422575	-0.593202	1
Lhk-1	728	G	G	A	M	I	N	9	3	124	40	72	17	81	26	99	43	0.25	0.243902	0.191011	0.242991	0.302817	0.970643	0.00134496	0
Lhk-1	731	A	A	C	V	V	S	9	1	131	12	43	10	60	7	89	18	0.1	0.0839161	0.188679	0.104478	0.168224	0.125541	-0.0618357	0
Lhk-1	735	G	G	A	E	K	N	9	1	127	18	45	11	59	11	94	17	0.1	0.124138	0.196429	0.157143	0.153153	0.0565206	-0.0568392	0
Lhk-1	755	T	T	C	Y	Y	S	12	1	158	18	91	0	103	0	132	0	0.0769231	0.102273	0	0	0	0.0894648	0.0895979	0
Lhk-1	760	T	T	G	F	C	N	12	1	161	12	95	1	106	0	136	1	0.0769231	0.0693642	0.0104167	0	0.00729927	0.00307814	0.0672383	0
Lhk-1	785	C	T	C	Y	Y	S	9	4	116	51	67	23	76	21	99	36	0.307692	0.305389	0.255556	0.216495	0.266667	0.0573849	0.0603017	0
Lhk-1	839	G	G	C	P	P	S	12	1	160	18	95	3	115	1	127	3	0.0769231	0.101124	0.0306122	0.00862069	0.0230769	0.0595571	0.0682534	0
Lhk-1	889	C	C	A	S	Y	N	10	3	131	43	62	20	89	20	89	30	0.230769	0.247126	0.243902	0.183486	0.252101	0.63435	0.0124513	0
Lhk-1	908	C	C	A	I	I	S	9	1	121	17	69	0	90	1	93	2	0.1	0.123188	0	0.010989	0.0210526	0.0313096	0.100914	1
Lhk-1	957	G	G	A	E	K	N	9	1	121	25	31	17	48	13	60	14	0.1	0.171233	0.354167	0.213115	0.189189	0.159565	-0.11654	0
Lhk-1	962	G	G	C	W	C	N	9	1	120	25	29	20	47	12	58	14	0.1	0.172414	0.408163	0.20339	0.194444	0.196648	-0.132459	0
Lhk-1	970	A	T	A	K	M	N	5	5	56	84	12	34	24	33	33	35	0.5	0.6	0.73913	0.578947	0.514706	0.518012	-0.0609279	0
Lhk-1	972	G	G	T	D	Y	N	9	1	132	9	46	1	50	8	60	10	0.1	0.0638298	0.0212766	0.137931	0.142857	0.699312	-0.0187734	0
Lhk-1	979	C	C	T	A	V	N	9	1	123	22	30	20	43	15	59	15	0.1	0.151724	0.4	0.258621	0.202703	0.0977163	-0.161246	0
Lhk-1	980	G	G	A	A	A	S	9	1	136	9	50	0	59	0	74	0	0.1	0.062069	0	0	0	0.146362	0.0810345	0
Lhk-1	986	C	C	T	F	F	S	8	2	114	29	30	22	44	17	65	15	0.2	0.202797	0.423077	0.278689	0.1875	0.300144	-0.0950232	0
Lhk-1	1003	C	C	G	P	R	N	9	1	118	17	50	0	61	0	81	2	0.1	0.125926	0	0	0.0240964	0.0273727	0.104931	1
Lhk-1	1023	A	A	G	N	D	N	9	1	113	13	48	0	64	1	84	3	0.1	0.103175	0	0.0153846	0.0344828	0.0119295	0.0849648	1
Lhk-1	1065	C	C	T	L	F	N	8	2	95	29	49	2	69	1	87	5	0.2	0.233871	0.0392157	0.0142857	0.0543478	0.0135649	0.180986	1
Lhk-1	1069	G	G	A	R	K	N	9	1	116	8	52	0	68	2	91	1	0.1	0.0645161	0	0.0285714	0.0108696	0.111617	0.0691111	0
Lhk-1	1093	G	G	T	UTR	UTR	UTR	9	1	108	14	58	0	62	2	88	4	0.1	0.114754	0	0.03125	0.0434783	0.0127218	0.0824676	1
Lhk-1	1096	G	G	T	UTR	UTR	UTR	8	2	94	23	54	5	55	12	73	21	0.2	0.196581	0.0847458	0.179104	0.223404	0.472885	0.0358724	0
Lhk-1	1107	A	A	G	UTR	UTR	UTR	9	1	111	7	64	0	71	0	109	0	0.1	0.059322	0	0	0	0.159141	0.079661	0
Lhk-1	1112	G	G	A	UTR	UTR	UTR	9	1	106	10	73	0	80	1	115	2	0.1	0.0862069	0	0.0123457	0.017094	0.00916736	0.0832902	1
Lhk-1	1118	A	A	G	UTR	UTR	UTR	9	1	100	10	79	0	84	1	122	2	0.1	0.0909091	0	0.0117647	0.016129	0.00146329	0.0861566	1
Lhk-1	1155	A	A	T	UTR	UTR	UTR	8	1	74	10	39	19	60	13	94	22	0.111111	0.119048	0.327586	0.178082	0.189655	0.134778	-0.116695	0
Lhk-1	1158	G	A	G	UTR	UTR	UTR	6	3	44	29	41	5	61	5	91	8	0.333333	0.39726	0.108696	0.0757576	0.0808081	0.0519869	0.276876	0
Lhk-1	1168	C	C	A	UTR	UTR	UTR	7	1	74	11	67	0	77	1	130	2	0.125	0.129412	0	0.0128205	0.0151515	0.000358894	0.117882	1
Lhk-1	1197	G	G	A	UTR	UTR	UTR	11	1	101	11	127	0	136	1	210	3	0.0833333	0.0982143	0	0.00729927	0.0140845	0.0196142	0.0836459	1
Lhk-1	1201	C	C	A	UTR	UTR	UTR	11	1	109	5	130	2	134	7	210	8	0.0833333	0.0438596	0.0151515	0.0496454	0.0366972	0.343601	0.0297651	0
Lhk-1	1235	G	G	C	UTR	UTR	UTR	10	1	98	14	132	1	141	3	222	2	0.0909091	0.125	0.0075188	0.0208333	0.00892857	0.0962058	0.0955276	0
Lhk-1	1268	T	T	C	UTR	UTR	UTR	11	1	99	14	136	1	135	3	221	4	0.0833333	0.123894	0.00729927	0.0217391	0.0177778	0.131266	0.0880082	0
Lhk-1	1313	T	T	A	UTR	UTR	UTR	6	2	51	13	91	2	76	4	95	3	0.25	0.203125	0.0215054	0.05	0.0306122	0.0512013	0.192523	0
Lhk-1	1329	C	C	A	UTR	UTR	UTR	11	2	84	13	149	2	155	5	205	4	0.153846	0.134021	0.013245	0.03125	0.0191388	0.0175269	0.122722	1
Lhk-1	1333	C	C	A	UTR	UTR	UTR	7	6	54	42	35	112	40	109	40	146	0.461538	0.4375	0.761905	0.731544	0.784946	0.000574808	-0.309946	1
Lhk-1	1338	T	T	C	UTR	UTR	UTR	11	2	88	10	155	2	152	5	186	4	0.153846	0.102041	0.0127389	0.0318471	0.0210526	0.13936	0.106064	0
Lhk-1	1342	T	T	A	UTR	UTR	UTR	12	1	88	8	94	58	114	37	140	44	0.0769231	0.0833333	0.381579	0.245033	0.23913	0.0457893	-0.208453	1
Lhk-1	1353	G	G	C	UTR	UTR	UTR	11	2	74	16	133	4	142	7	167	5	0.153846	0.177778	0.0291971	0.0469799	0.0290698	0.0240299	0.13073	1
Lhk-1	1356	A	A	C	UTR	UTR	UTR	8	5	52	34	85	49	73	73	78	90	0.384615	0.395349	0.365672	0.5	0.535714	0.273974	-0.0771465	0
Lhk-1	1362	G	G	A	UTR	UTR	UTR	12	1	83	5	137	1	151	2	174	1	0.0769231	0.0568182	0.00724638	0.0130719	0.00571429	0.0956272	0.0581931	0
Lhk-1	1375	C	C	A	UTR	UTR	UTR	11	2	79	7	141	1	154	5	160	2	0.153846	0.0813953	0.00704225	0.0314465	0.0123457	0.208115	0.100676	0
Lhk-1	1389	C	C	T	UTR	UTR	UTR	12	2	88	4	131	1	144	3	150	1	0.142857	0.0434783	0.00757576	0.0204082	0.00662252	0.346354	0.0816322	0
Lhk-1	1393	C	C	T	UTR	UTR	UTR	13	1	89	2	127	0	142	0	143	0	0.0714286	0.021978	0	0	0	0.30997	0.0467033	0
Lhk-1	1419	A	A	T	UTR	UTR	UTR	12	2	93	7	121	1	133	2	142	1	0.142857	0.07	0.00819672	0.0148148	0.00699301	0.228639	0.0964271	0
Lhk-1	1430	T	T	C	UTR	UTR	UTR	13	1	87	1	123	0	135	0	135	0	0.0714286	0.0113636	0	0	0	0.399561	0.0413961	0
Lhk-1	1432	C	C	T	UTR	UTR	UTR	12	2	70	19	102	19	113	19	117	17	0.142857	0.213483	0.157025	0.143939	0.126866	0.492426	0.0355602	0
Lhk-1	1433	A	A	C	UTR	UTR	UTR	13	1	81	7	77	43	89	40	100	30	0.0714286	0.0795455	0.358333	0.310078	0.230769	0.0252735	-0.22424	1
Lhk-1	1443	C	C	A	UTR	UTR	UTR	11	2	60	19	93	17	103	16	108	16	0.153846	0.240506	0.154545	0.134454	0.129032	0.404197	0.0578324	0
Lhk-1	1455	C	C	A	UTR	UTR	UTR	13	1	70	5	67	34	78	32	92	32	0.0714286	0.0666667	0.336634	0.290909	0.258065	0.00940647	-0.226155	1
Lhk-1	1458	G	G	A	UTR	UTR	UTR	13	1	71	5	96	1	99	2	113	4	0.0714286	0.0657895	0.0103093	0.019802	0.034188	0.0125673	0.0471759	0
Lhk-1	1469	G	G	A	UTR	UTR	UTR	7	6	39	26	19	70	17	72	18	89	0.461538	0.4	0.786517	0.808989	0.831776	0.0254846	-0.378325	1
Lhk-2	6	T	T	C	Y	H	N	9	1	10	0	19	2	20	8	28	9	0.1	0	0.0952381	0.285714	0.243243	0.133993	-0.158065	0
Lhk-2	14	C	C	T	V	V	S	9	1	15	1	31	10	41	14	69	18	0.1	0.0625	0.243902	0.254545	0.206897	0.0187981	-0.153865	1
Lhk-2	32	G	T	G	W	C	N	8	1	21	5	53	5	83	7	112	4	0.111111	0.192308	0.0862069	0.0777778	0.0344828	0.250284	0.0855536	0
Lhk-2	43	C	C	G	S	C	N	8	1	26	6	62	5	99	8	134	5	0.111111	0.1875	0.0746269	0.0747664	0.0359712	0.235564	0.0875174	0
Lhk-2	56	G	G	T	L	L	S	8	1	39	5	70	1	109	2	151	1	0.111111	0.113636	0.0140845	0.018018	0.00657895	0.000348273	0.0994799	1
Lhk-2	121	C	A	C	A	D	N	10	1	98	13	130	6	170	7	265	7	0.0909091	0.117117	0.0441176	0.039548	0.0257353	0.0823653	0.0675461	0
Lhk-2	135	G	C	G	D	H	N	10	1	96	11	58	8	108	11	150	7	0.0909091	0.102804	0.121212	0.092437	0.044586	0.682106	0.0107781	0
Lhk-2	192	C	C	A	R	S	N	10	1	125	17	58	22	88	22	139	38	0.0909091	0.119718	0.275	0.2	0.214689	0.0198223	-0.124583	1
Lhk-2	232	G	G	T	G	V	N	10	1	120	14	64	25	100	28	156	43	0.0909091	0.104478	0.280899	0.21875	0.21608	0.0153196	-0.140883	1
Lhk-2	235	T	T	A	L	H	N	9	2	120	16	76	13	112	16	163	35	0.181818	0.117647	0.146067	0.125	0.176768	0.991305	0.000454256	0
Lhk-2	248	T	T	C	H	H	S	10	1	119	15	66	20	96	30	151	36	0.0909091	0.11194	0.232558	0.238095	0.192513	0.00674628	-0.119631	1
Lhk-2	255	A	A	G	I	V	N	10	1	116	13	68	20	96	30	160	37	0.0909091	0.100775	0.227273	0.238095	0.187817	0.0100478	-0.121886	1
Lhk-2	275	T	T	G	G	G	S	10	1	114	9	89	0	136	0	217	2	0.0909091	0.0731707	0	0	0.00913242	0.0478936	0.0789958	0
Lhk-2	276	G	G	A	D	N	N	10	1	115	9	89	0	136	0	215	2	0.0909091	0.0725806	0	0	0.00921659	0.0509623	0.0786727	0
Lhk-2	383	G	G	T	T	T	S	10	1	136	16	77	5	110	14	146	22	0.0909091	0.105263	0.0609756	0.112903	0.130952	0.885953	-0.00352428	0
Lhk-2	405	G	G	A	D	N	N	10	1	147	1	76	1	123	0	163	1	0.0909091	0.00675676	0.012987	0	0.00609756	0.496189	0.0424714	0
Lhk-2	415	C	C	T	P	L	N	9	1	132	14	61	12	112	9	125	18	0.1	0.0958904	0.164384	0.0743802	0.125874	0.461073	-0.0236007	0
Lhk-2	416	C	C	A	P	P	S	9	1	133	13	61	12	112	9	126	17	0.1	0.0890411	0.164384	0.0743802	0.118881	0.44376	-0.0246944	0
Lhk-2	420	A	A	C	N	H	N	9	1	129	17	49	9	87	9	99	18	0.1	0.116438	0.155172	0.09375	0.153846	0.331845	-0.026037	0
Lhk-2	441	G	G	A	E	K	N	9	1	133	20	67	0	104	2	117	0	0.1	0.130719	0	0.0188679	0	0.0553073	0.10907	0
Lhk-2	470	G	G	A	E	E	S	10	1	154	20	92	0	122	2	137	0	0.0909091	0.114943	0	0.016129	0	0.0423321	0.0975495	1
Lhk-2	473	T	T	C	N	N	S	10	1	165	12	85	9	110	14	124	16	0.0909091	0.0677966	0.0957447	0.112903	0.114286	0.197428	-0.0282917	0
Lhk-2	478	C	C	A	S	Y	N	10	1	163	17	87	9	110	19	125	23	0.0909091	0.0944444	0.09375	0.147287	0.155405	0.177091	-0.0394706	0
Lhk-2	482	G	G	A	S	S	S	8	3	122	59	51	47	87	43	83	70	0.272727	0.325967	0.479592	0.330769	0.457516	0.107323	-0.123279	0
Lhk-2	495	C	C	T	P	S	N	10	1	176	15	95	13	129	19	139	23	0.0909091	0.078534	0.12037	0.128378	0.141975	0.0182805	-0.0455198	0
Lhk-2	506	T	T	C	D	D	S	10	1	178	14	102	2	143	2	154	1	0.0909091	0.0729167	0.0192308	0.0137931	0.00645161	0.0499665	0.0687544	0
Lhk-2	523	T	T	A	L	H	N	10	1	156	0	113	0	146	0	159	0	0.0909091	0	0	0	0	0.5	0.0454545	0
Lhk-2	524	T	T	A	L	L	S	10	1	159	1	114	0	146	0	158	0	0.0909091	0.00625	0	0	0	0.456301	0.0485795	0
Lhk-2	525	C	C	G	P	A	N	10	1	164	0	115	0	147	0	160	0	0.0909091	0	0	0	0	0.5	0.0454545	0
Lhk-2	527	T	T	A	P	P	S	10	1	150	4	115	0	148	0	162	0	0.0909091	0.025974	0	0	0	0.322829	0.0584416	0
Lhk-2	529	C	C	A	P	Q	N	10	1	160	1	114	0	145	0	160	0	0.0909091	0.00621118	0	0	0	0.456572	0.0485601	0
Lhk-2	530	G	G	A	P	P	S	10	1	159	1	112	0	144	0	153	1	0.0909091	0.00625	0	0	0.00649351	0.470384	0.046415	0
Lhk-2	531	C	C	G	P	A	N	7	4	111	55	56	56	98	45	88	66	0.363636	0.331325	0.5	0.314685	0.428571	0.341376	-0.0669381	0
Lhk-2	532	C	C	G	P	R	N	10	1	165	0	111	0	142	0	152	0	0.0909091	0	0	0	0	0.5	0.0454545	0
Lhk-2	533	G	G	A	P	P	S	10	1	160	0	115	0	140	0	151	0	0.0909091	0	0	0	0	0.5	0.0454545	0
Lhk-2	534	C	C	A	P	T	N	10	1	164	0	115	0	142	0	152	0	0.0909091	0	0	0	0	0.5	0.0454545	0
Lhk-2	535	C	C	G	P	R	N	10	1	165	0	115	0	146	0	153	0	0.0909091	0	0	0	0	0.5	0.0454545	0
Lhk-2	536	G	G	A	P	P	S	10	1	163	0	116	0	147	0	155	0	0.0909091	0	0	0	0	0.5	0.0454545	0
Lhk-2	539	A	A	T	Q	H	N	10	1	162	1	117	0	150	1	160	0	0.0909091	0.00613497	0	0.00662252	0	0.471492	0.0463145	0
Lhk-2	540	G	G	T	A	S	N	10	1	165	1	118	0	153	0	169	0	0.0909091	0.0060241	0	0	0	0.457876	0.0484666	0
Lhk-2	542	A	A	T	A	A	S	10	1	172	0	122	0	150	0	171	0	0.0909091	0	0	0	0	0.5	0.0454545	0
Lhk-2	543	A	A	C	K	Q	N	10	1	174	0	122	0	150	0	171	0	0.0909091	0	0	0	0	0.5	0.0454545	0
Lhk-2	573	G	G	T	E	STOP	N	10	1	197	12	115	1	142	1	180	3	0.0909091	0.0574163	0.00862069	0.00699301	0.0163934	0.155272	0.0634936	0
Lhk-2	575	G	G	A	E	E	S	10	1	188	20	121	1	146	4	188	1	0.0909091	0.0961538	0.00819672	0.0266667	0.00529101	0.0031792	0.0801467	0
Lhk-2	580	G	G	T	C	F	N	10	1	181	31	124	2	138	3	194	1	0.0909091	0.146226	0.015873	0.0212766	0.00512821	0.156018	0.104475	0
Lhk-2	599	C	C	A	I	I	S	9	2	173	23	102	23	135	18	170	33	0.181818	0.117347	0.184	0.117647	0.162562	0.905325	-0.00515365	0
Lhk-2	603	G	G	C	D	H	N	8	2	153	26	100	19	128	15	159	29	0.2	0.145251	0.159664	0.104895	0.154255	0.424581	0.0330209	0
Lhk-2	604	A	A	C	D	A	N	10	1	176	19	116	5	143	7	192	8	0.0909091	0.0974359	0.0413223	0.0466667	0.04	0.00830132	0.0515095	0
Lhk-2	609	G	T	G	G	C	N	9	2	155	39	112	6	135	10	184	9	0.181818	0.201031	0.0508475	0.0689655	0.0466321	0.00724779	0.135943	1
Lhk-2	618	T	T	G	C	G	N	10	1	178	18	98	30	118	39	177	41	0.0909091	0.0918367	0.234375	0.248408	0.188073	0.0184211	-0.132246	1
Lhk-2	657	C	C	T	R	C	N	10	1	176	25	133	4	159	6	226	15	0.0909091	0.124378	0.0291971	0.0363636	0.0622407	0.0959503	0.0650431	0
Lhk-2	691	C	C	T	A	V	N	10	1	170	19	120	3	147	6	235	16	0.0909091	0.100529	0.0243902	0.0392157	0.063745	0.0309677	0.0532688	0
Lhk-2	746	G	G	T	L	L	S	10	1	157	18	108	0	141	1	220	0	0.0909091	0.102857	0	0.00704225	0	0.0201488	0.0945357	1
Lhk-2	762	C	C	A	L	I	N	9	2	143	30	93	2	142	5	208	7	0.181818	0.17341	0.0210526	0.0340136	0.0325581	0.000332878	0.148406	1
Lhk-2	774	C	C	T	H	Y	N	10	1	169	14	93	0	136	2	200	4	0.0909091	0.0765027	0	0.0144928	0.0196078	0.0110866	0.072339	0
Lhk-2	788	G	G	T	S	S	S	9	2	149	31	86	3	128	3	214	4	0.181818	0.172222	0.0337079	0.0229008	0.0183486	0.000479652	0.152034	1
Lhk-2	814	C	C	T	A	V	N	10	1	152	20	80	2	116	10	159	13	0.0909091	0.116279	0.0243902	0.0793651	0.0755814	0.137998	0.0438152	0
Lhk-2	843	C	C	A	P	T	N	11	1	145	16	135	1	160	5	245	5	0.0833333	0.0993789	0.00735294	0.030303	0.02	0.013817	0.0721375	0
Lhk-2	857	G	G	T	L	F	N	11	1	167	3	132	10	160	9	247	12	0.0833333	0.0176471	0.0704225	0.0532544	0.046332	0.882199	-0.00617948	0
Lhk-2	865	G	C	G	G	A	N	11	1	159	8	120	15	146	13	224	21	0.0833333	0.0479042	0.111111	0.081761	0.0857143	0.336507	-0.0272434	0
Lhk-2	953	G	G	A	L	L	S	11	1	166	11	70	6	112	10	143	7	0.0833333	0.0621469	0.0789474	0.0819672	0.0466667	0.834706	0.00354636	0
Lhk-2	970	C	C	T	S	L	N	11	1	166	8	48	22	78	34	93	42	0.0833333	0.045977	0.314286	0.303571	0.311111	0.0428418	-0.245001	1
Lhk-2	976	A	A	T	K	M	N	11	1	162	10	58	9	96	15	113	22	0.0833333	0.0581395	0.134328	0.135135	0.162963	0.0390509	-0.0734057	0
Lhk-2	988	C	C	T	S	L	N	11	1	162	17	58	10	96	13	130	15	0.0833333	0.0949721	0.147059	0.119266	0.103448	0.102958	-0.034105	0
Lhk-2	1048	C	C	A	A	E	N	11	1	150	17	71	2	127	1	151	1	0.0833333	0.101796	0.0273973	0.0078125	0.00657895	0.0189818	0.0786353	0
Lhk-2	1102	G	G	T	UTR	UTR	UTR	13	1	122	16	99	0	169	4	189	3	0.0714286	0.115942	0	0.0231214	0.015625	0.14609	0.0807698	0
Lhk-2	1103	G	G	A	UTR	UTR	UTR	12	2	120	22	72	26	123	51	142	54	0.142857	0.15493	0.265306	0.293103	0.27551	0.00105061	-0.12908	1
Lhk-2	1186	C	C	T	UTR	UTR	UTR	14	1	110	12	250	3	294	4	406	9	0.0666667	0.0983607	0.0118577	0.0134228	0.0216867	0.137383	0.0668579	0
Lhk-2	1196	T	T	G	UTR	UTR	UTR	14	1	111	8	230	23	289	18	394	28	0.0666667	0.0672269	0.0909091	0.0586319	0.0663507	0.657536	-0.00501713	0
Lhk-2	1197	G	G	T	UTR	UTR	UTR	14	1	115	7	232	23	289	18	394	28	0.0666667	0.057377	0.0901961	0.0586319	0.0663507	0.431851	-0.00970438	0
Lhk-2	1200	T	T	G	UTR	UTR	UTR	13	2	103	17	214	42	235	70	329	93	0.133333	0.141667	0.164062	0.229508	0.220379	0.0763723	-0.0671499	0
Lhk-2	1204	C	C	T	UTR	UTR	UTR	13	1	97	11	244	0	304	4	407	2	0.0714286	0.101852	0	0.012987	0.00488998	0.102042	0.0806812	0
Lhk-2	1231	G	G	C	UTR	UTR	UTR	18	1	112	5	261	24	296	19	416	36	0.0526316	0.042735	0.0842105	0.0603175	0.079646	0.055138	-0.0270414	0
Lhk-2	1232	C	C	A	UTR	UTR	UTR	18	1	105	10	281	2	315	3	448	3	0.0526316	0.0869565	0.00706714	0.00943396	0.00665188	0.170928	0.0620764	0
Lhk-2	1258	C	C	T	UTR	UTR	UTR	18	1	107	11	249	7	262	4	397	4	0.0526316	0.0932203	0.0273438	0.0150376	0.00997506	0.205845	0.0554738	0
Lhk-2	1289	T	T	C	UTR	UTR	UTR	17	2	104	7	193	84	185	98	326	96	0.105263	0.0630631	0.303249	0.34629	0.227488	0.0150455	-0.208179	1
Lhk-2	1302	G	G	A	UTR	UTR	UTR	17	1	83	11	262	1	271	6	391	11	0.0555556	0.117021	0.00380228	0.0216606	0.0273632	0.254363	0.0686797	0
Lhk-2	1309	C	C	T	UTR	UTR	UTR	14	4	95	2	253	1	263	0	384	3	0.222222	0.0206186	0.00393701	0	0.00775194	0.451265	0.117524	0
Lhk-2	1315	C	C	A	UTR	UTR	UTR	14	4	97	3	262	0	262	0	393	3	0.222222	0.03	0	0	0.00757576	0.420684	0.123586	0
Lhk-2	1329	C	C	G	UTR	UTR	UTR	15	4	84	24	145	97	142	94	230	128	0.210526	0.222222	0.400826	0.398305	0.357542	0.0029084	-0.169184	1
Lhk-2	1336	A	A	G	UTR	UTR	UTR	18	1	104	8	171	53	192	48	288	66	0.0526316	0.0714286	0.236607	0.2	0.186441	0.00391292	-0.145653	1
Lhk-2	1346	A	A	C	UTR	UTR	UTR	18	1	91	14	219	1	235	2	350	2	0.0526316	0.133333	0.00454545	0.00843882	0.00568182	0.276915	0.0867604	0
Lhk-2	1349	C	C	T	UTR	UTR	UTR	17	2	96	6	197	26	219	24	298	62	0.105263	0.0588235	0.116592	0.0987654	0.172222	0.251937	-0.0471499	0
Lhk-2	1379	T	T	A	UTR	UTR	UTR	17	2	88	1	224	1	254	0	348	0	0.105263	0.011236	0.00444444	0	0	0.440191	0.0567681	0
Lhk-2	1380	C	C	T	UTR	UTR	UTR	17	2	80	14	179	46	211	44	296	52	0.105263	0.148936	0.204444	0.172549	0.149425	0.211932	-0.0483733	0
Lhk-2	1457	C	C	T	UTR	UTR	UTR	13	4	52	4	106	1	146	1	179	1	0.235294	0.0714286	0.00934579	0.00680272	0.00555556	0.32528	0.146127	0
Lhk-2	1463	C	C	T	UTR	UTR	UTR	16	1	53	1	116	10	152	5	170	4	0.0588235	0.0185185	0.0793651	0.0318471	0.0229885	0.838274	-0.00606255	0
Lhk-2	1479	G	G	A	UTR	UTR	UTR	16	1	46	5	118	0	144	2	142	1	0.0588235	0.0980392	0	0.0136986	0.00699301	0.158454	0.0715342	0
