# Supplementary figures and images for: Unique structure and positive selection promote the rapid divergence of Drosophila Y chromosomes
Source: eLife journal article supplement (doi:10.7554/elife.75795), 2022-01-06

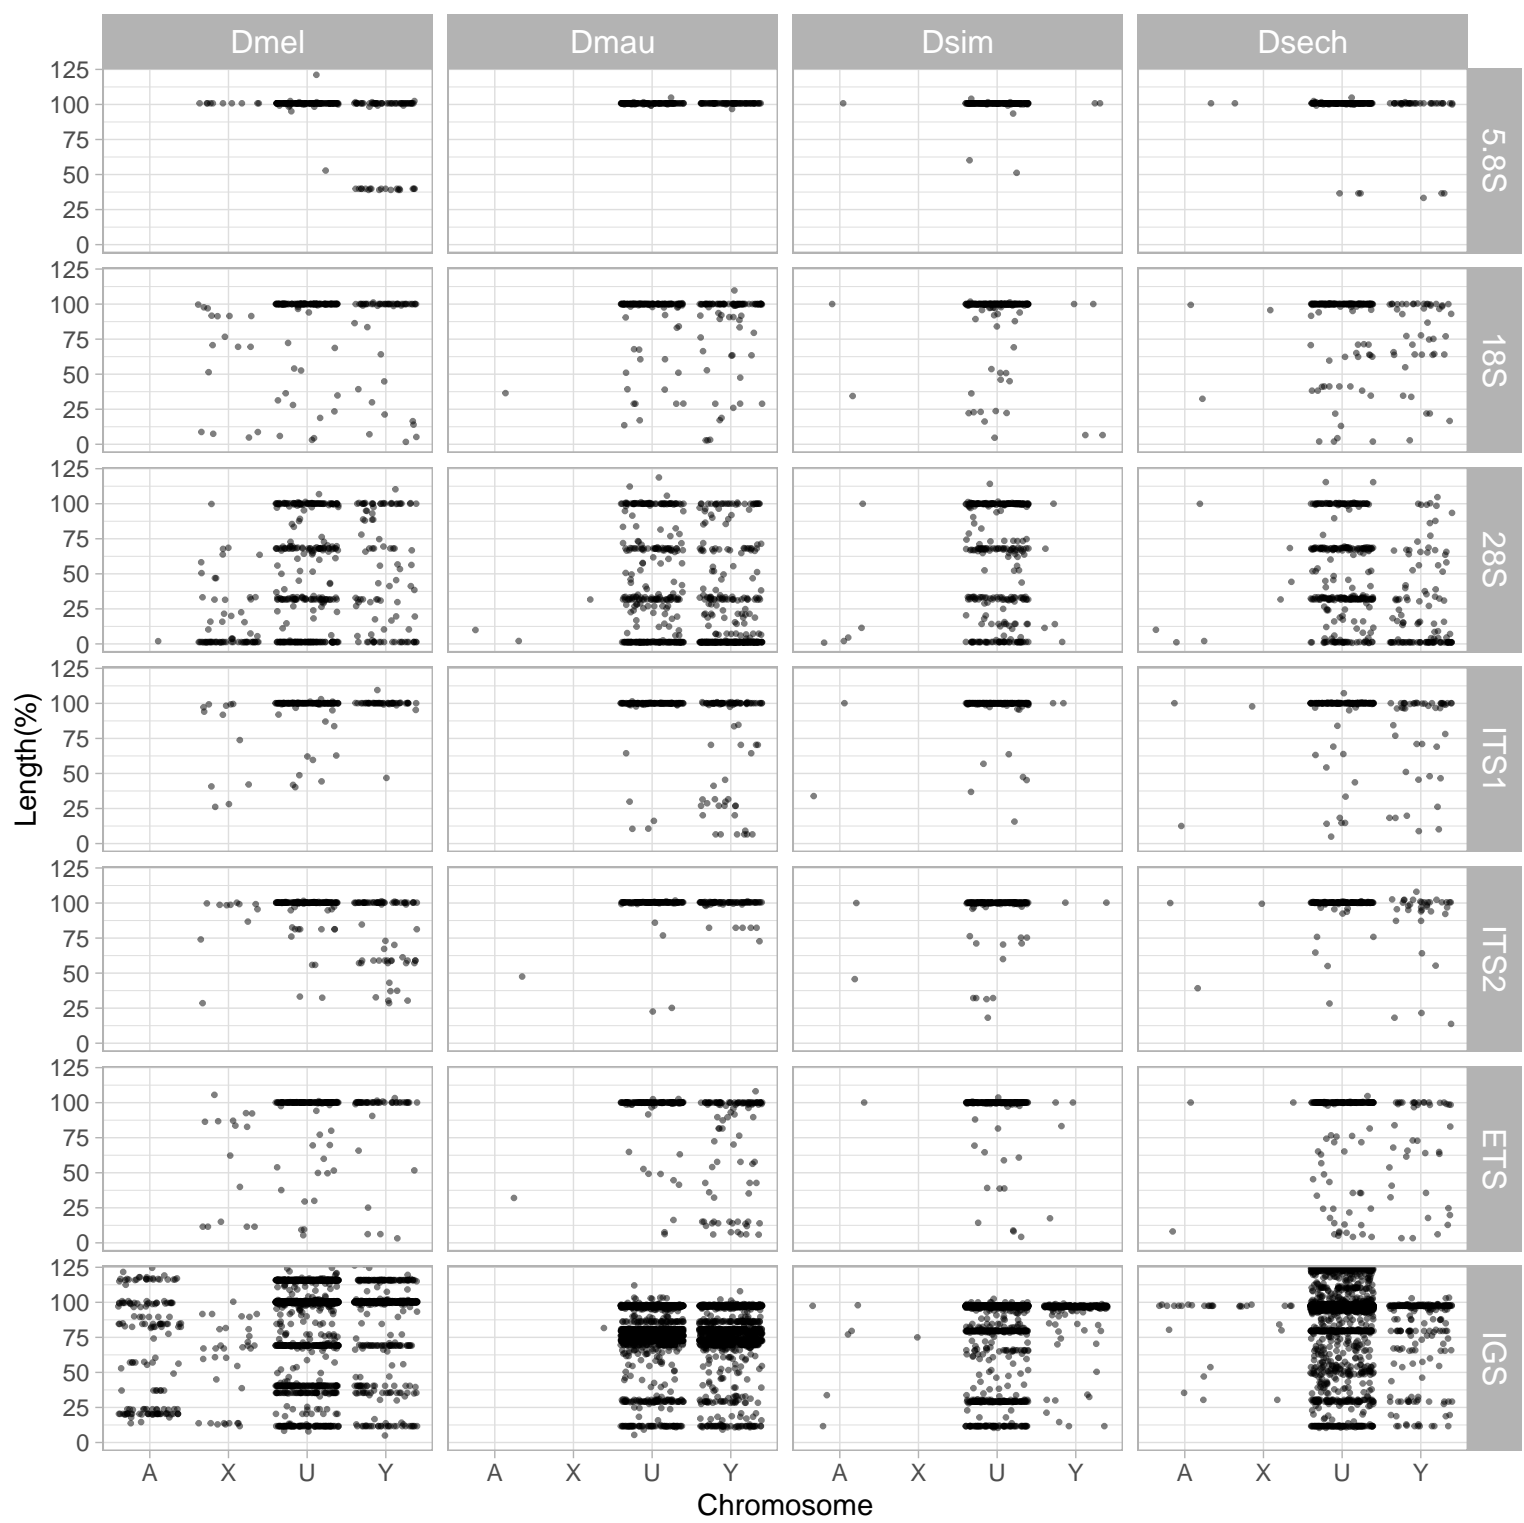

Supplement: supp [file elife-75795-supp-v1.zip]

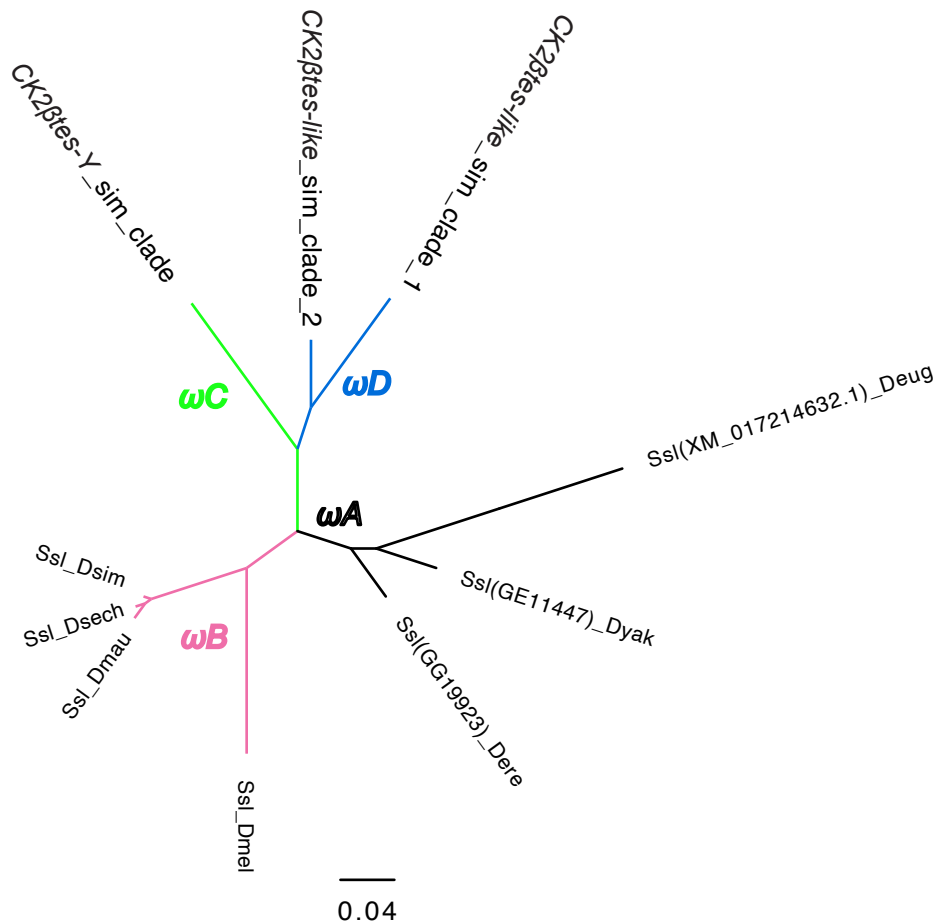

Supplement: supp [file elife-75795-supp-v1.zip]

Transposon

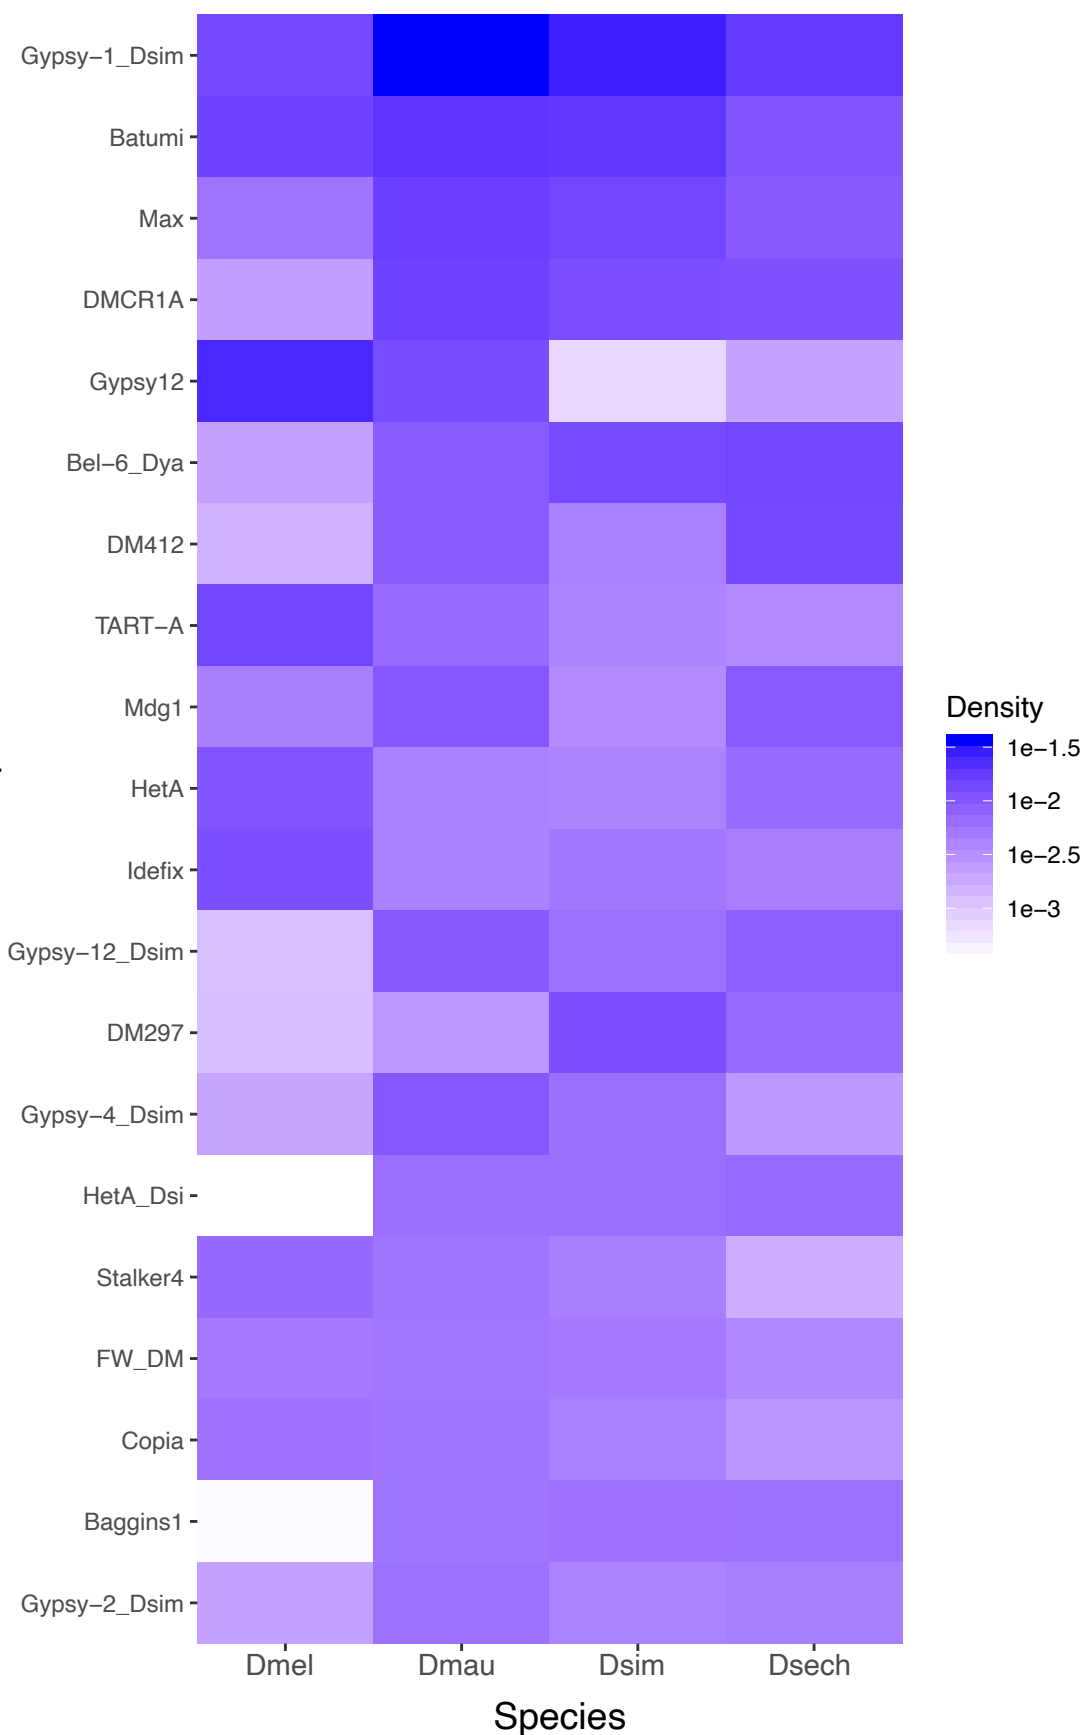

Supplement: supp [file elife-75795-supp-v1.zip]

SRPK(LOC6495876)\_Dana

0.04

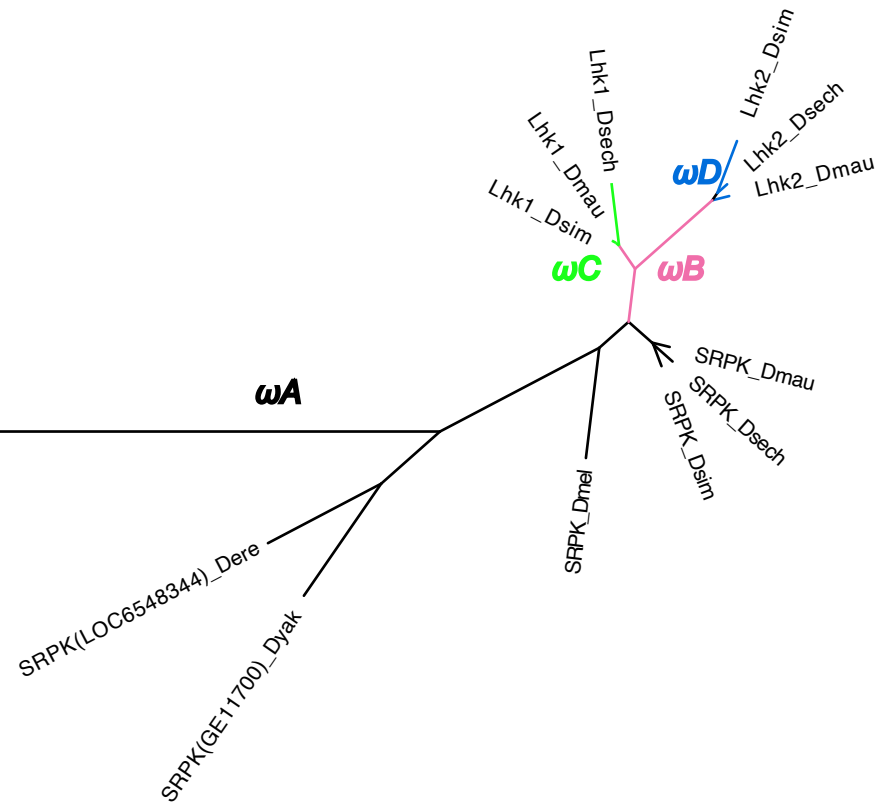

Supplement: supp [file elife-75795-supp-v1.zip]

*D. mauritiana*

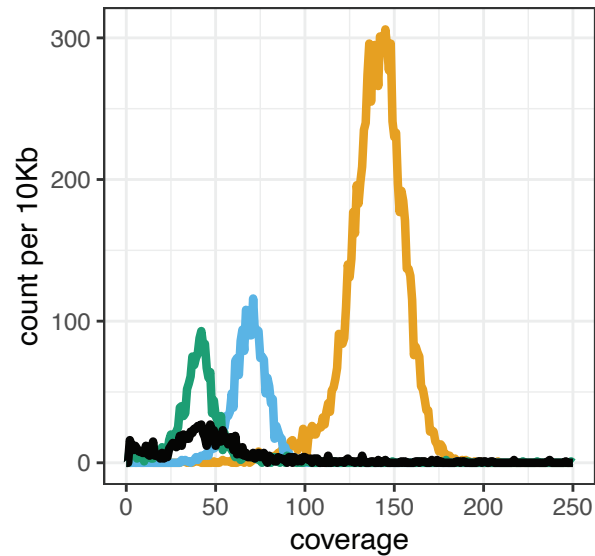

*D. simulans*

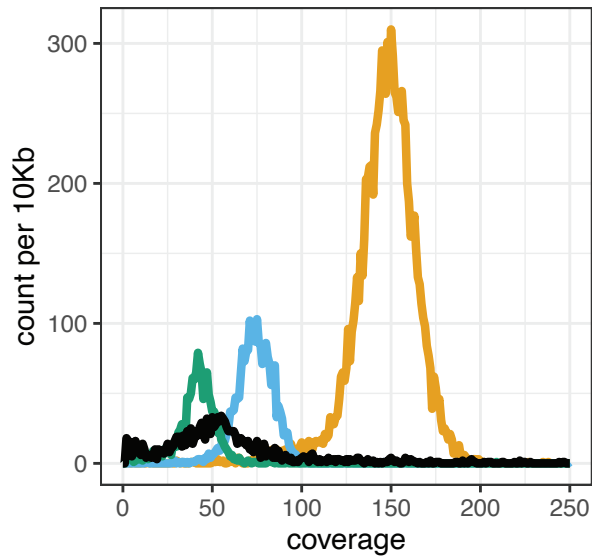

*D. sechellia*

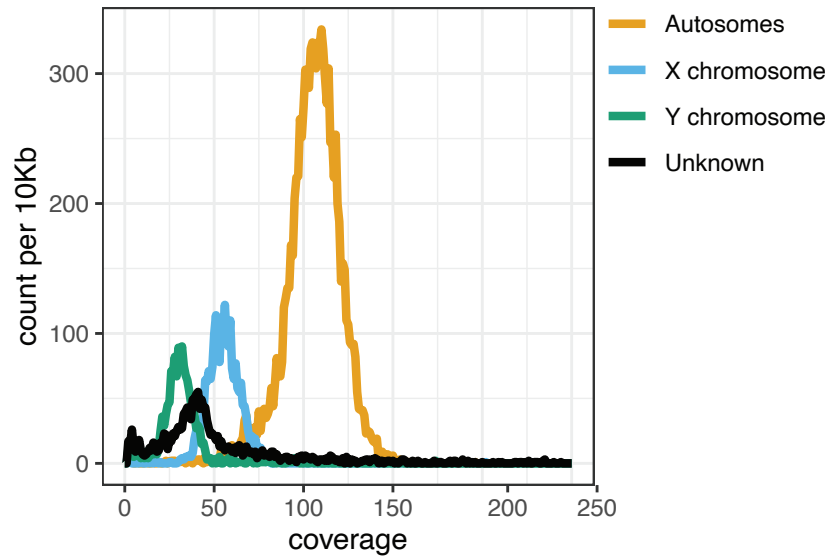

Supplement: supp [file elife-75795-supp-v1.zip]

ORY

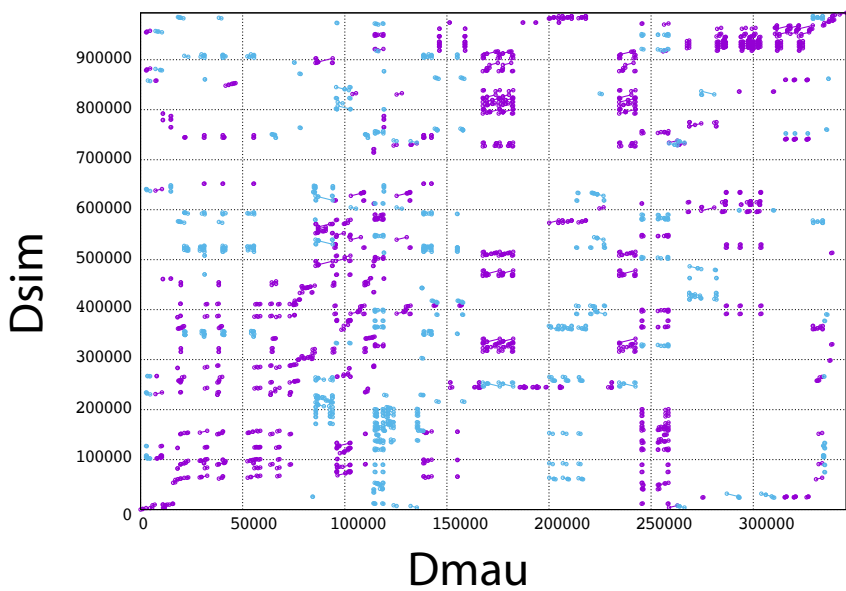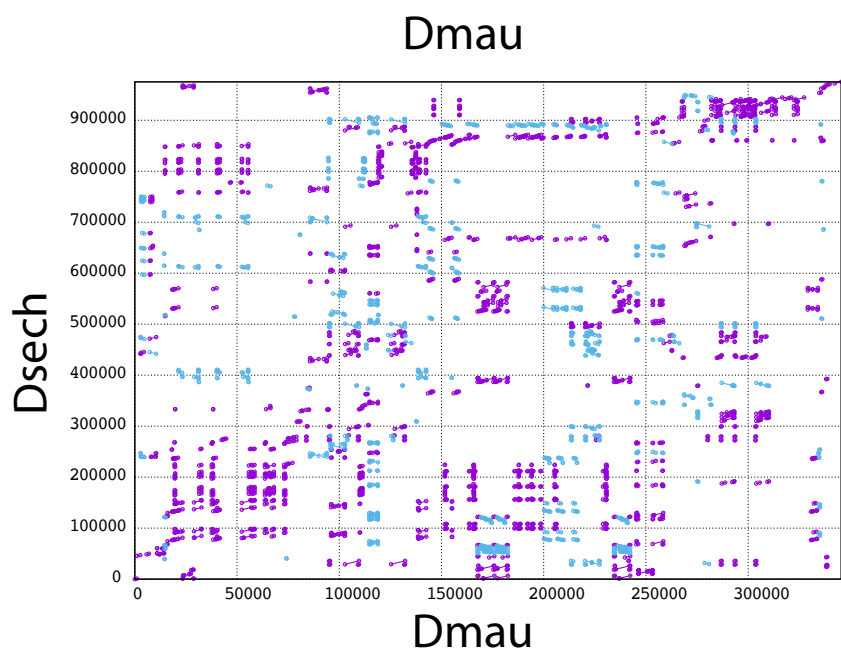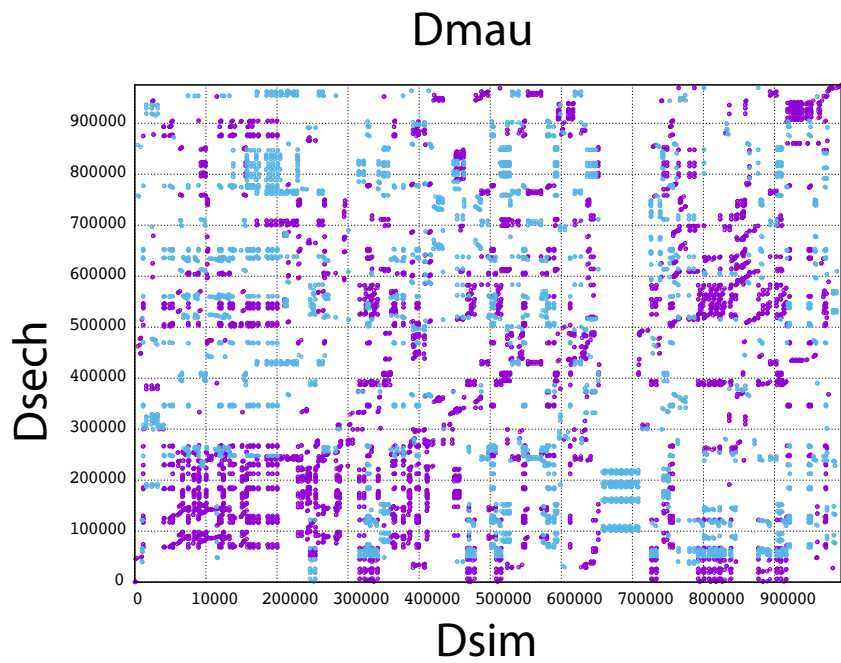

Supplement: supp [file elife-75795-supp-v1.zip]

*D. mauritiana*

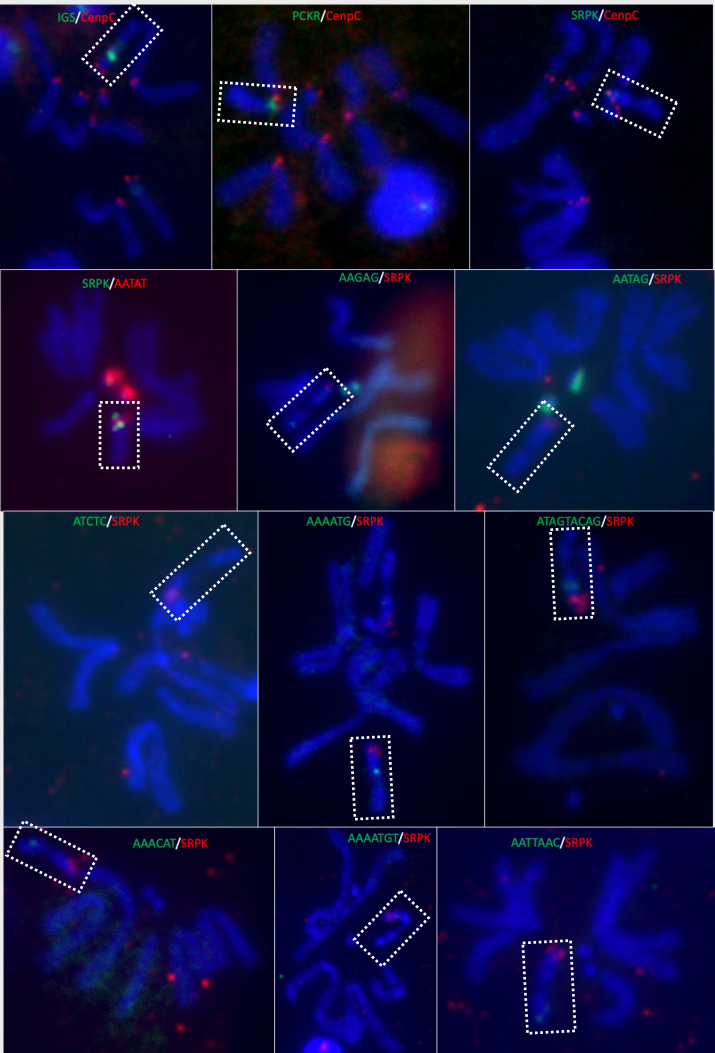

*D. simulans*

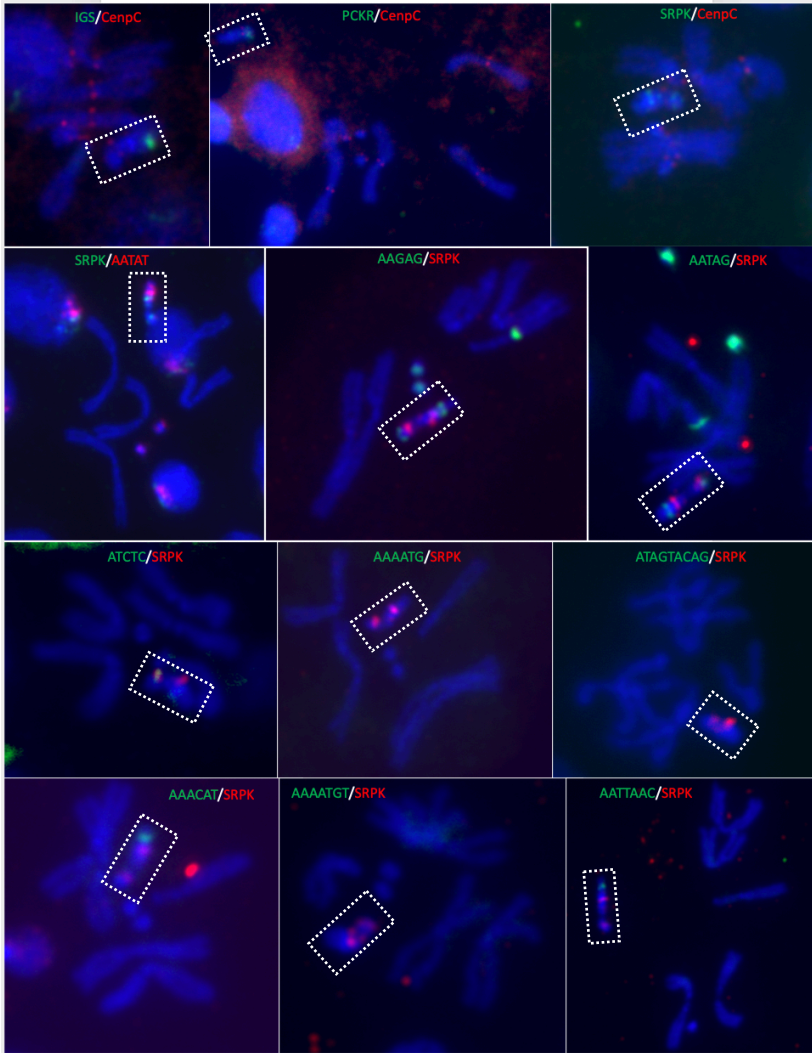

*D. sechellia*

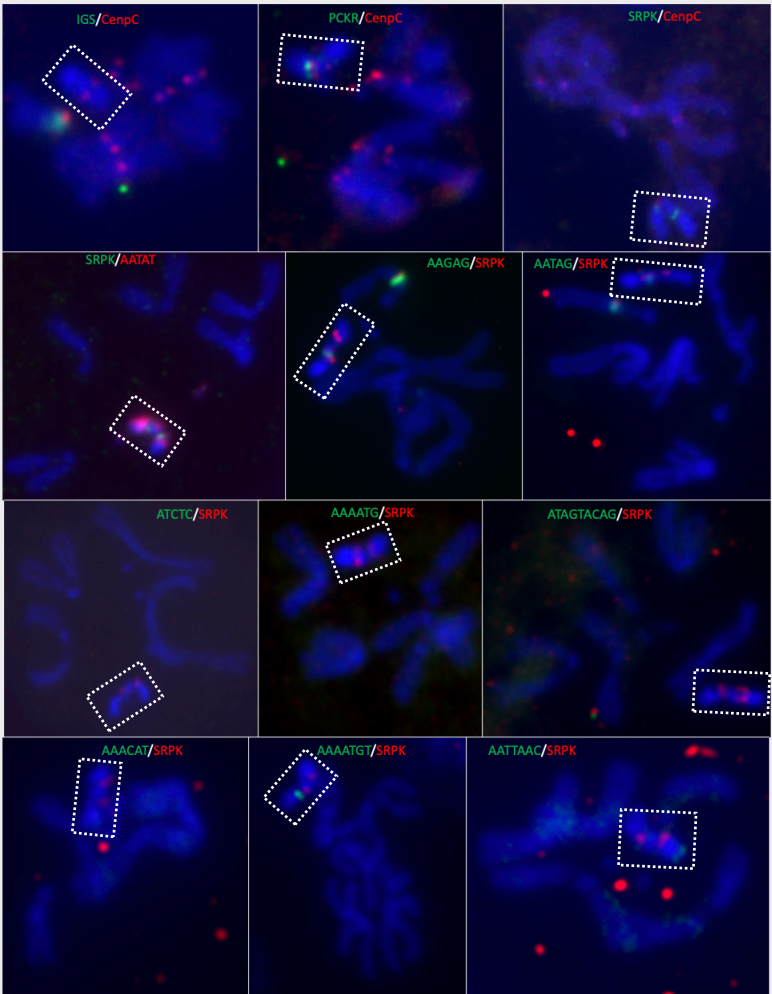

Supplement: supp [file elife-75795-supp-v1.zip]

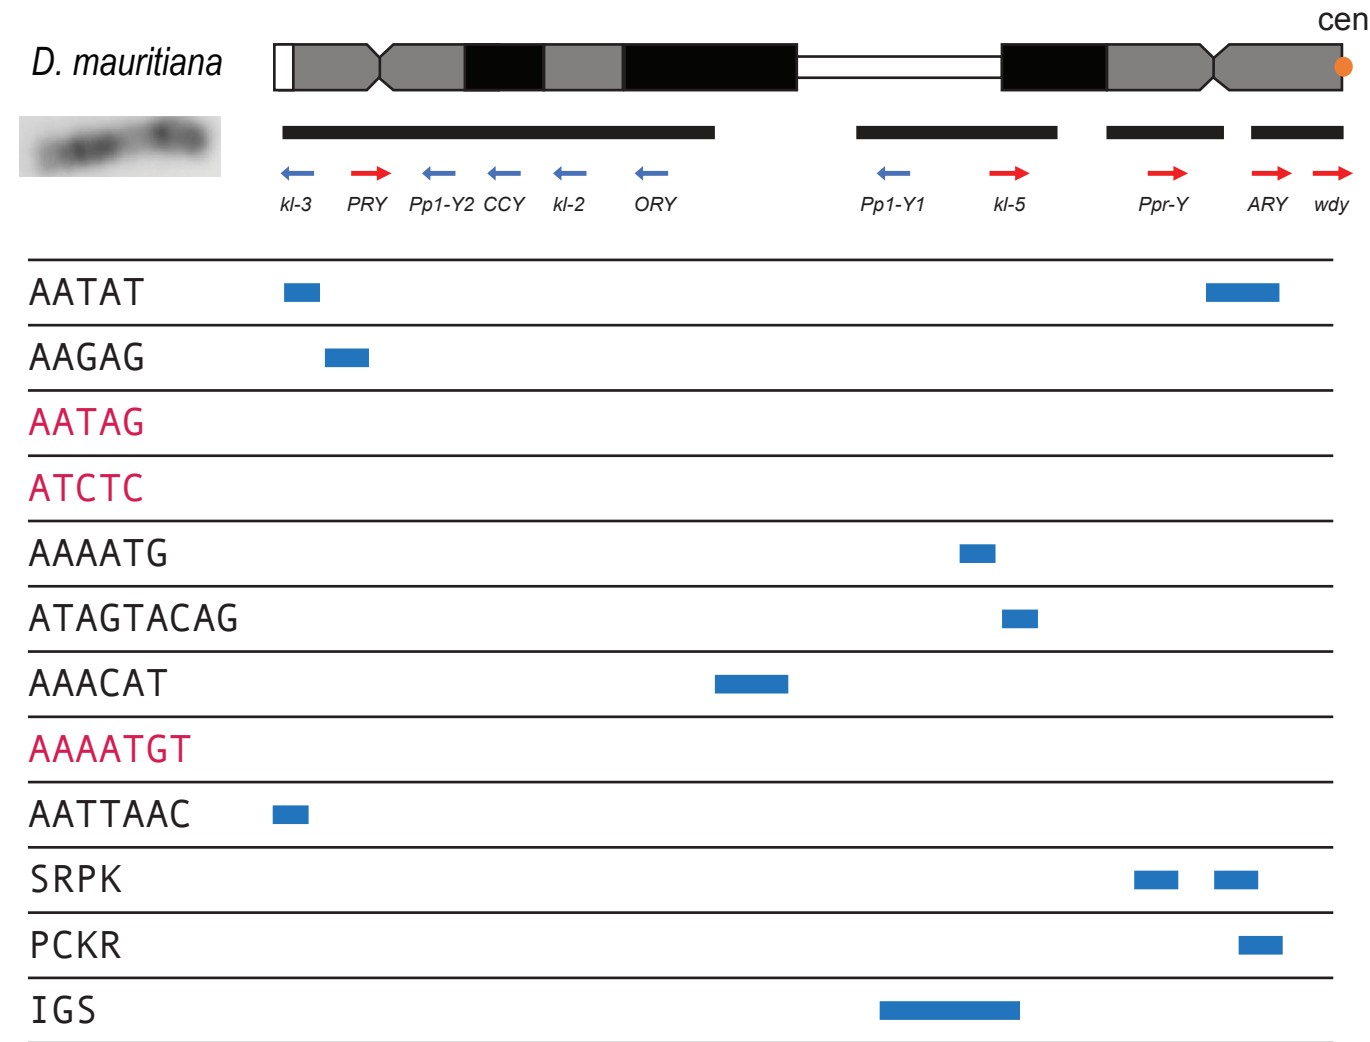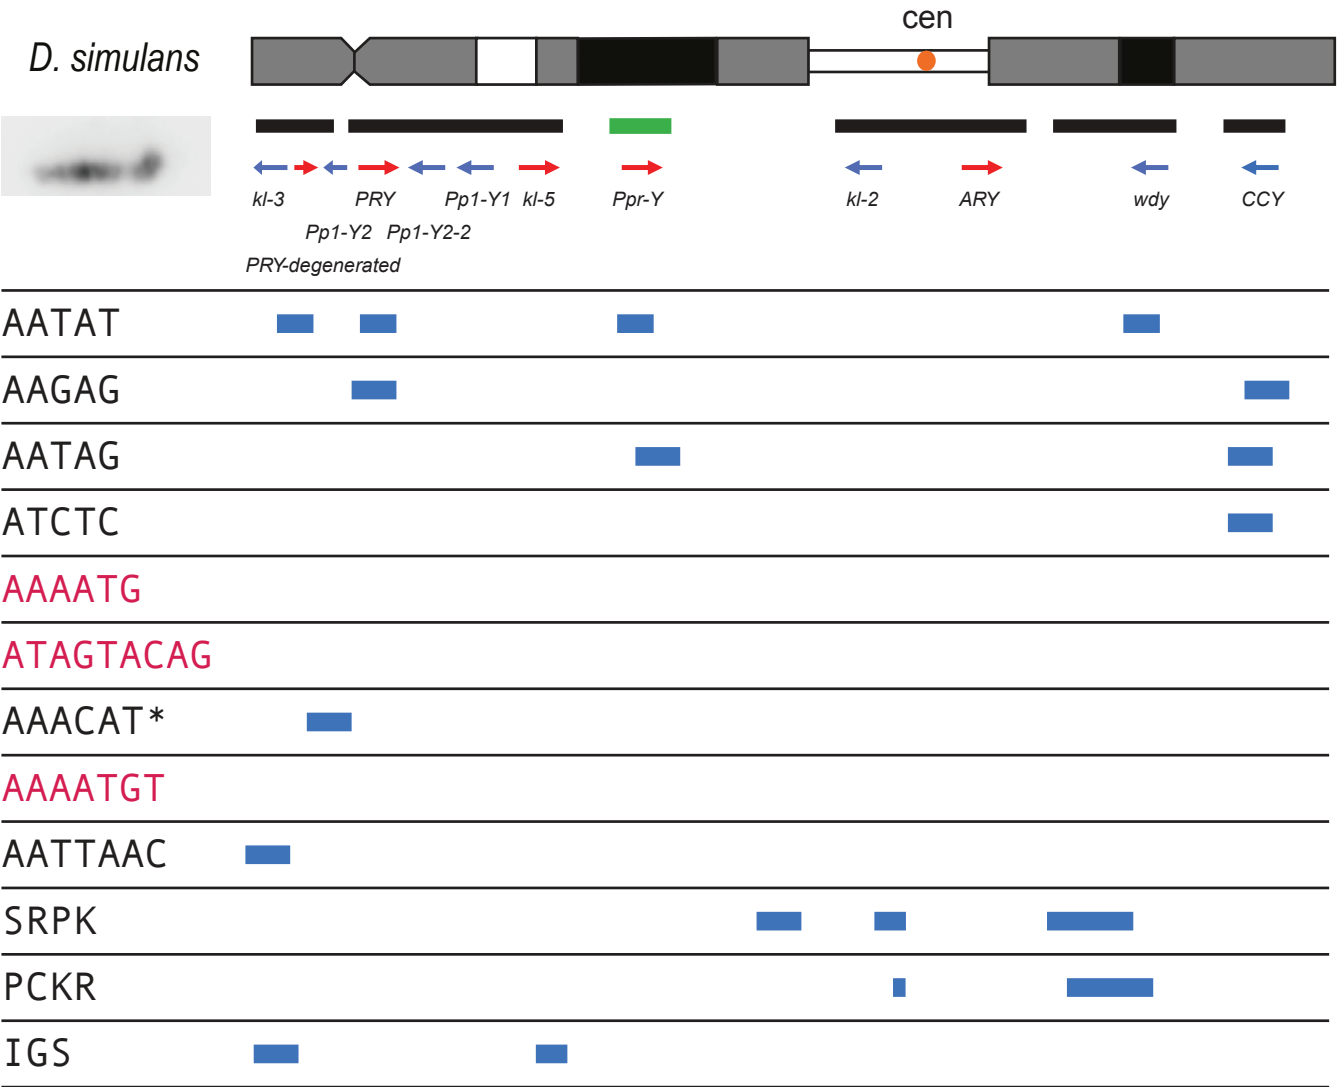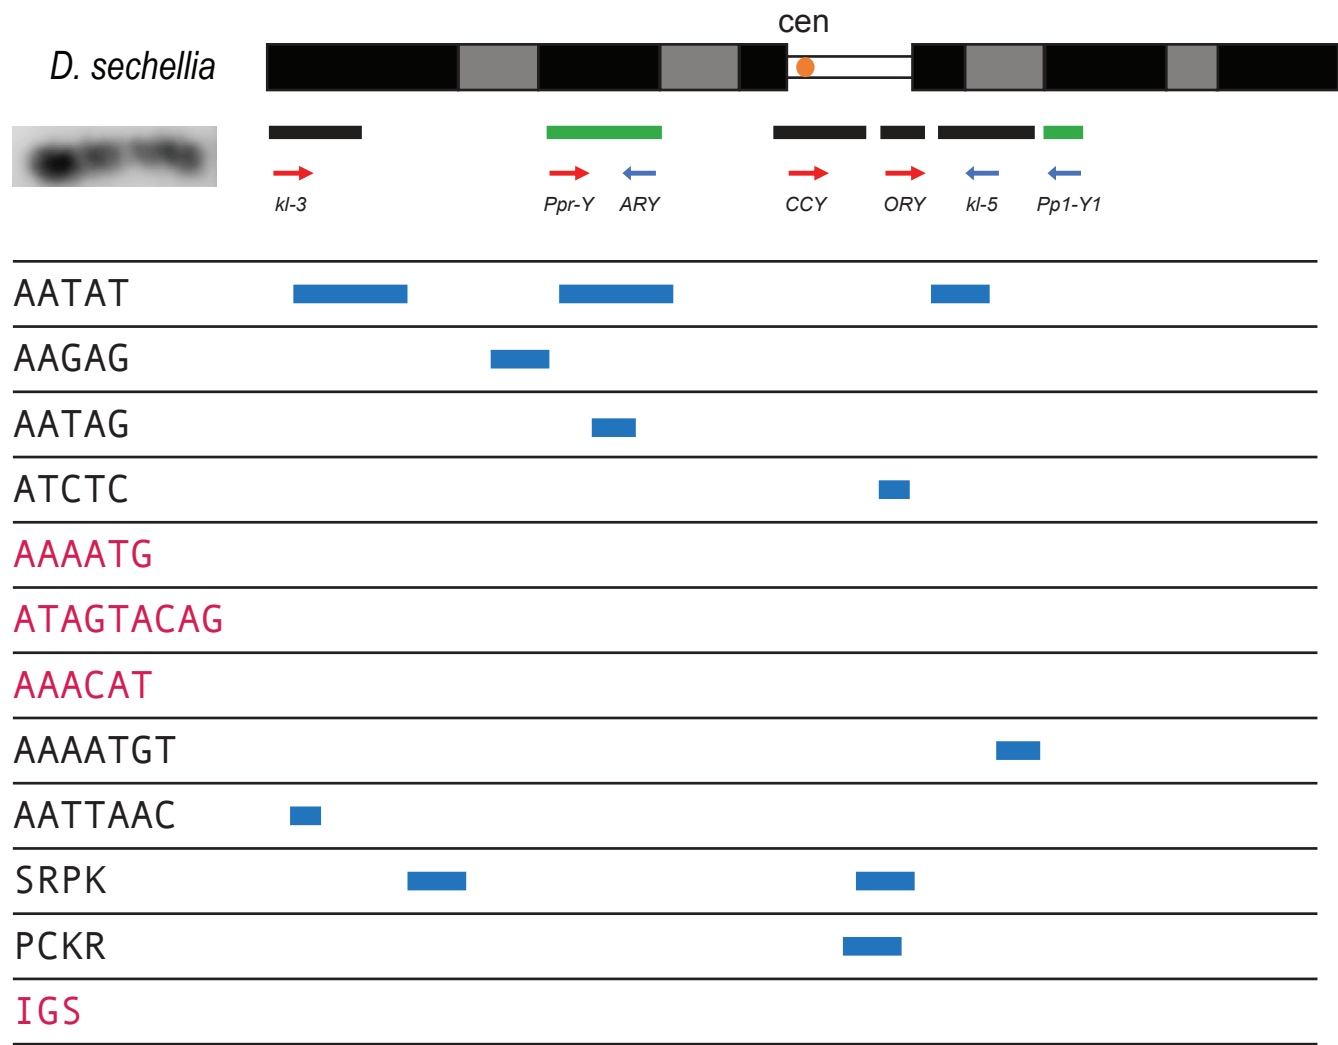

Supplement: supp [file elife-75795-supp-v1.zip]

**A**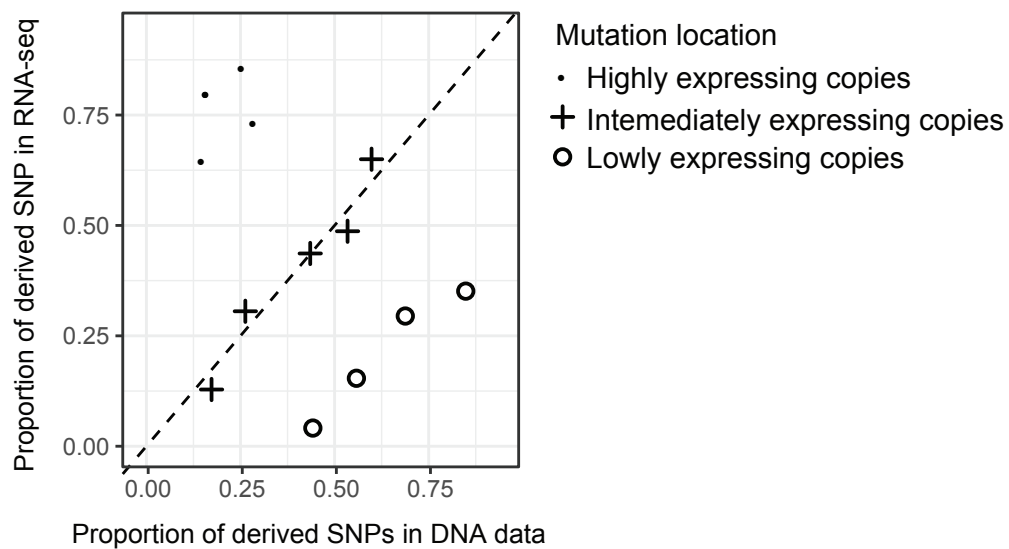**B***D. mauritiana*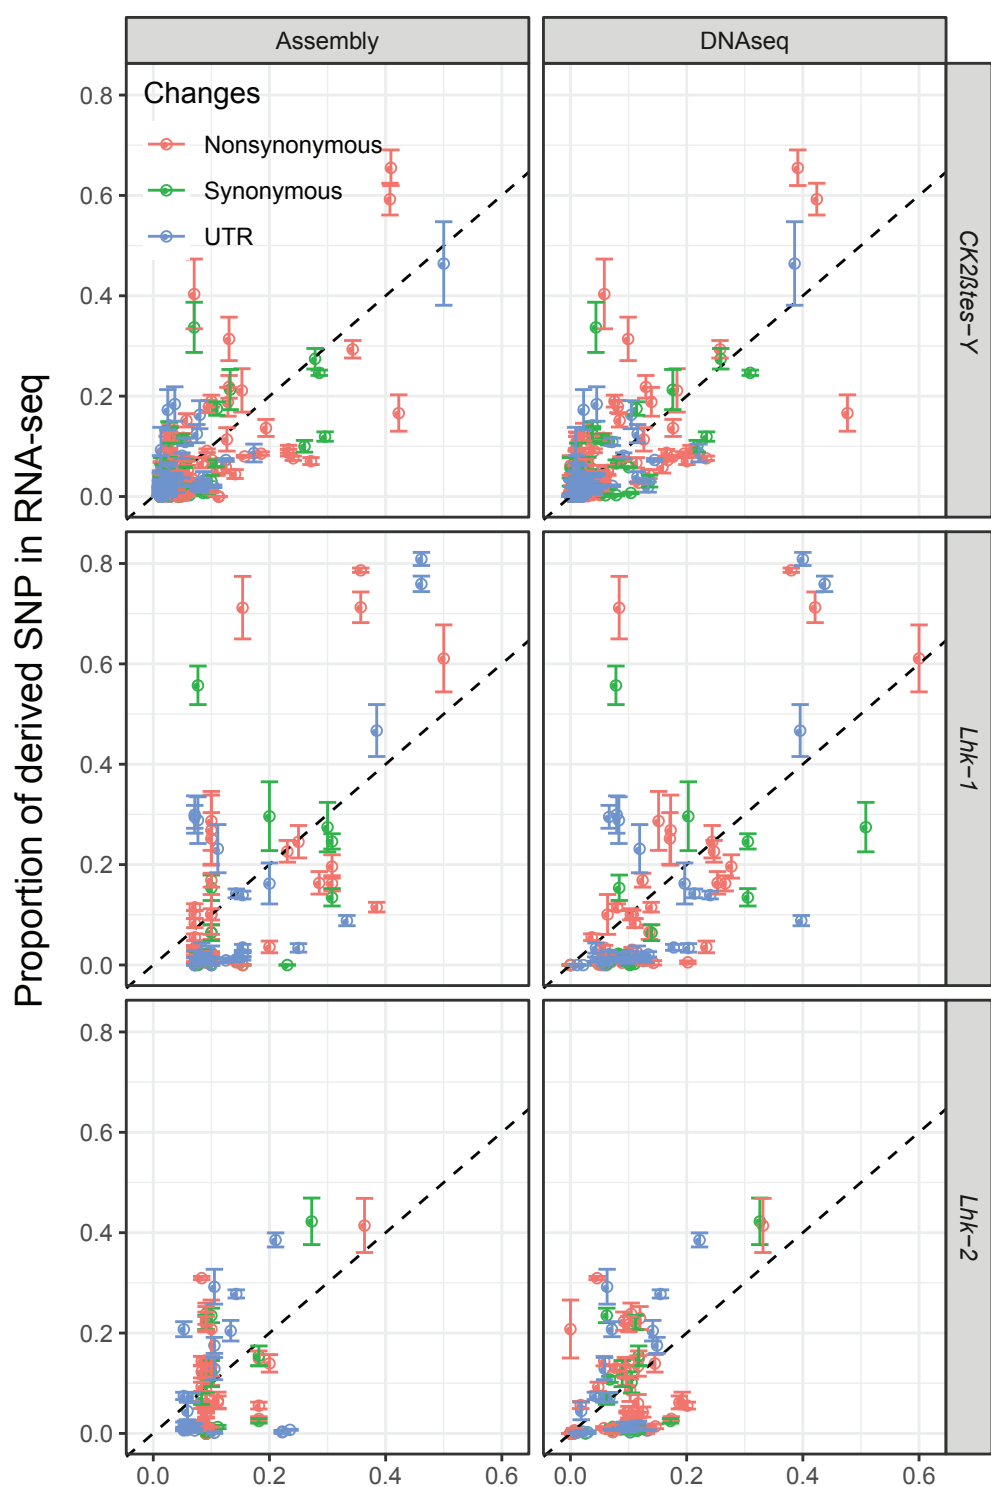*D. simulans*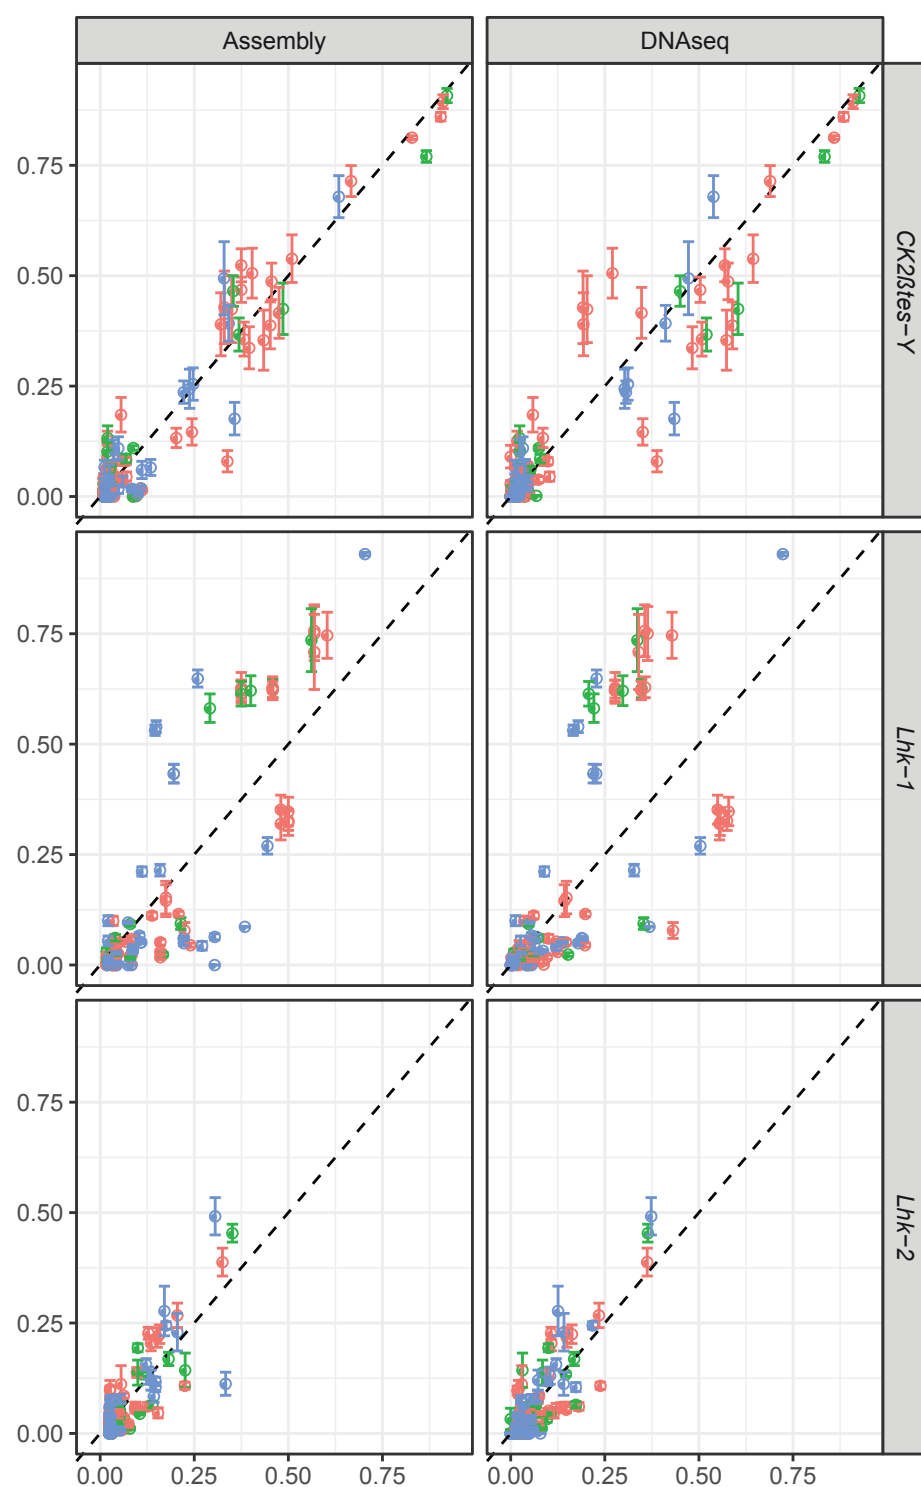

Proportion of derived SNPs in DNA data

Supplement: supp [file elife-75795-supp-v1.zip]

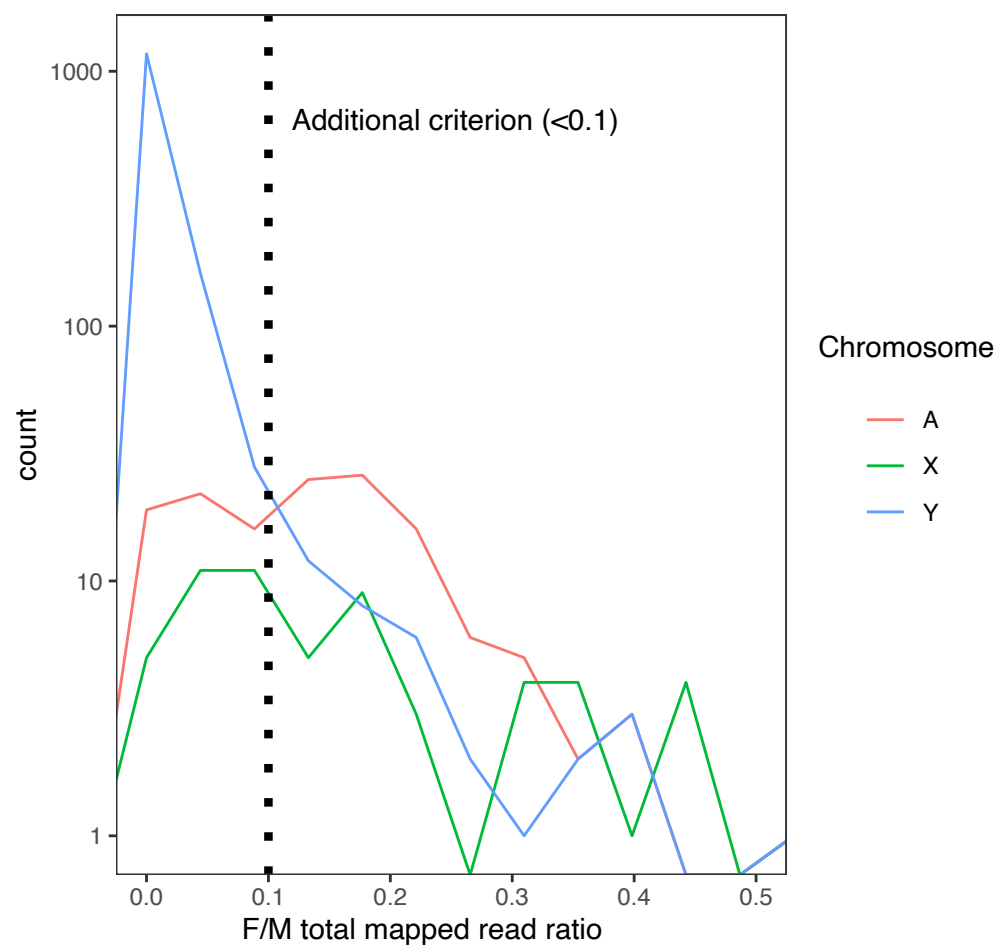

Supplement: supp [file elife-75795-supp-v1.zip]

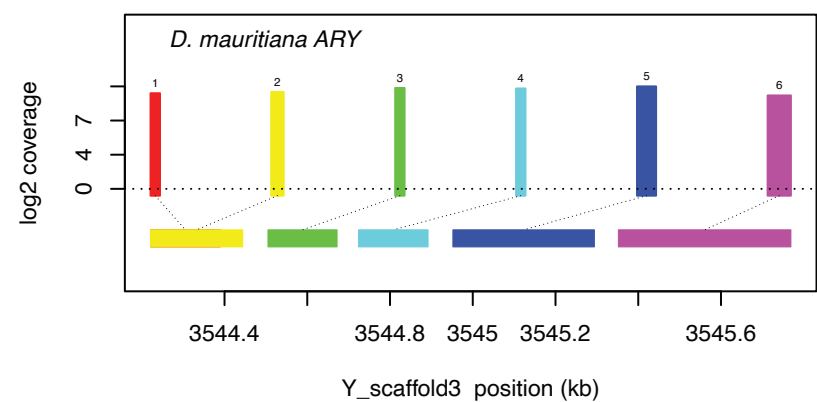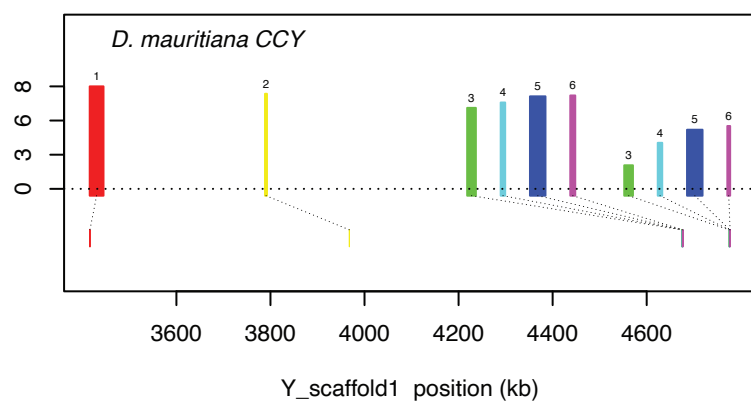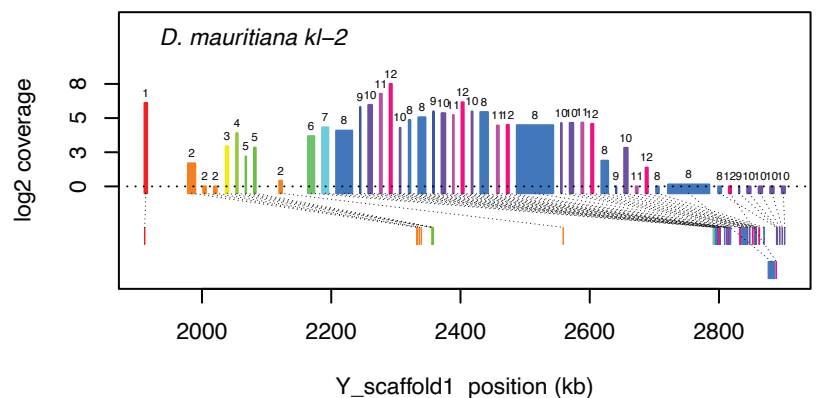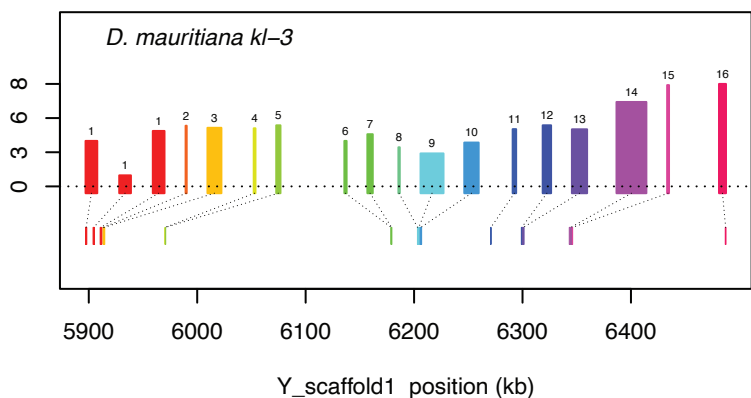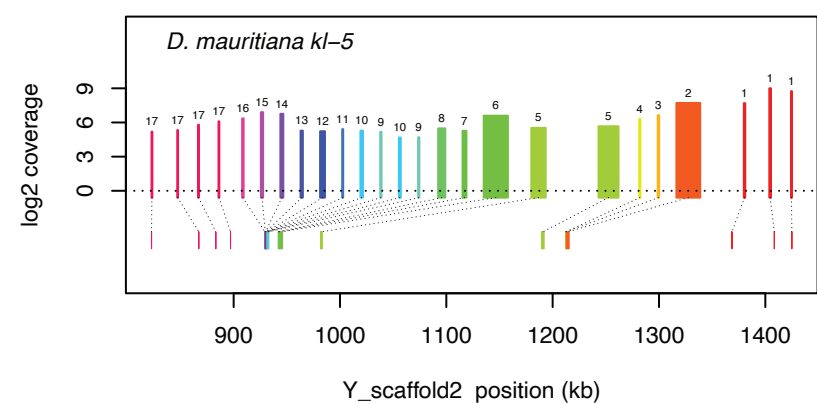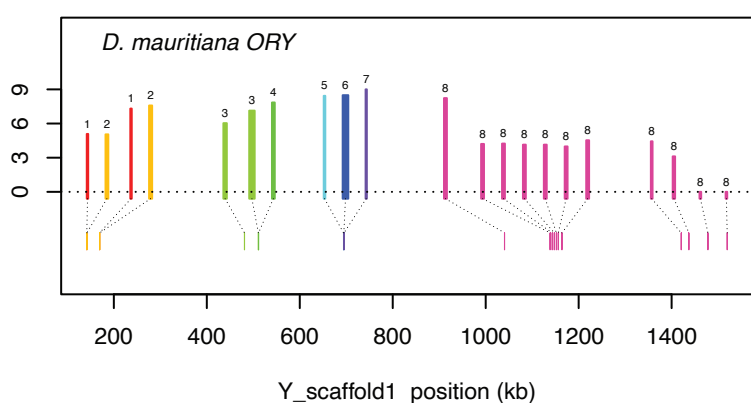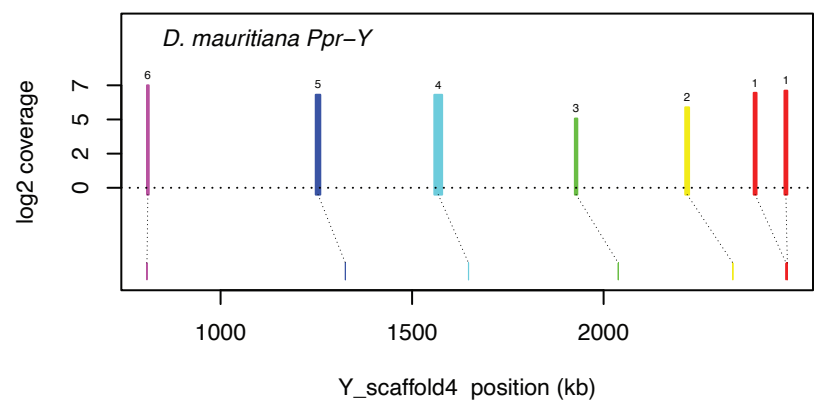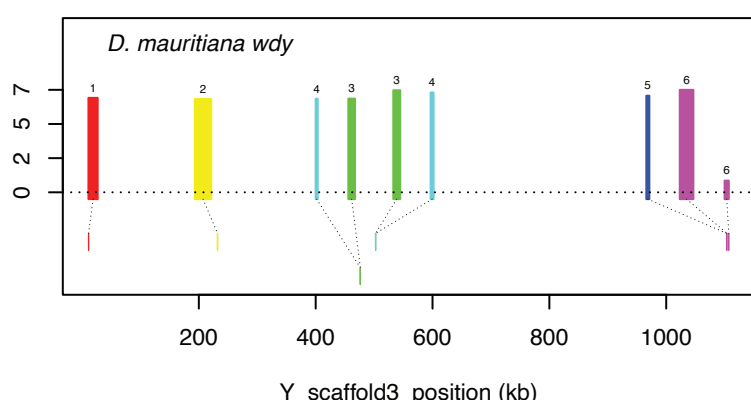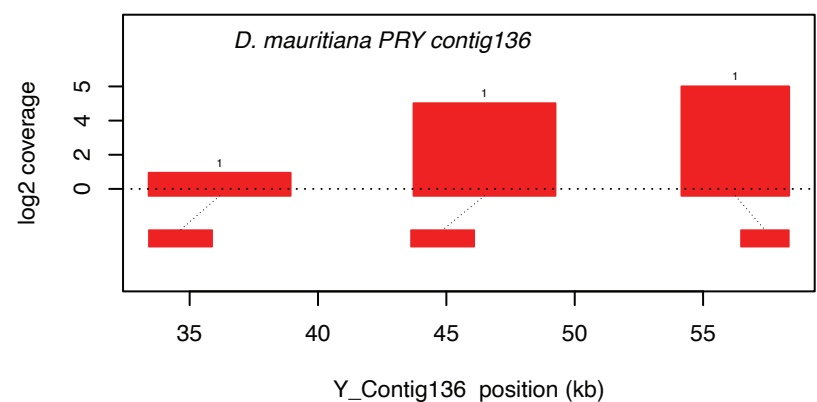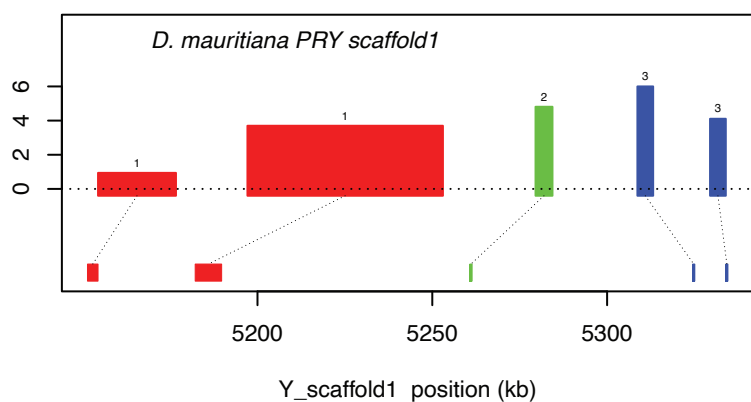

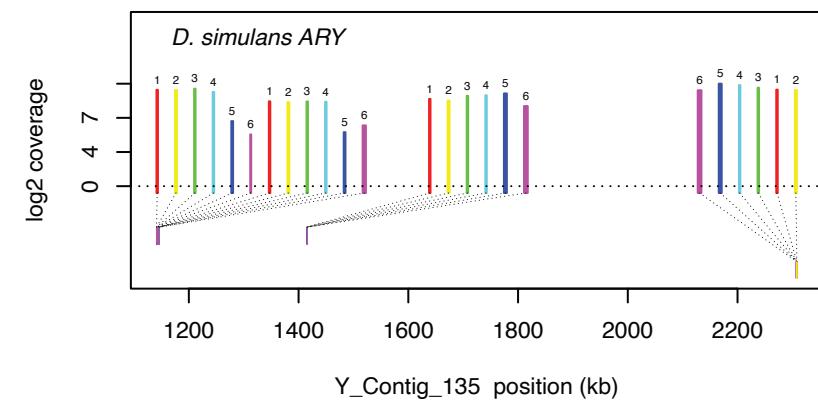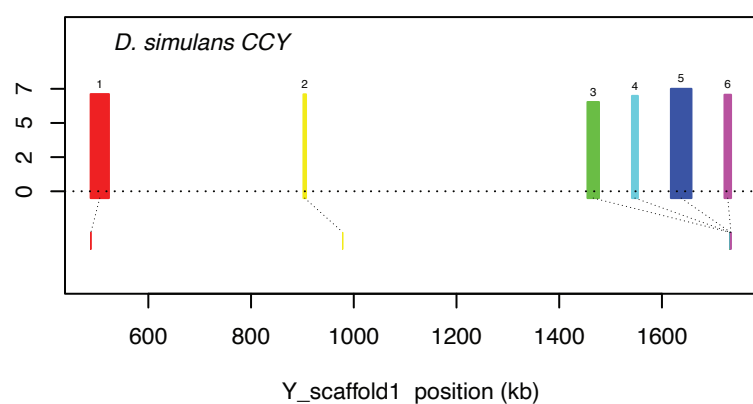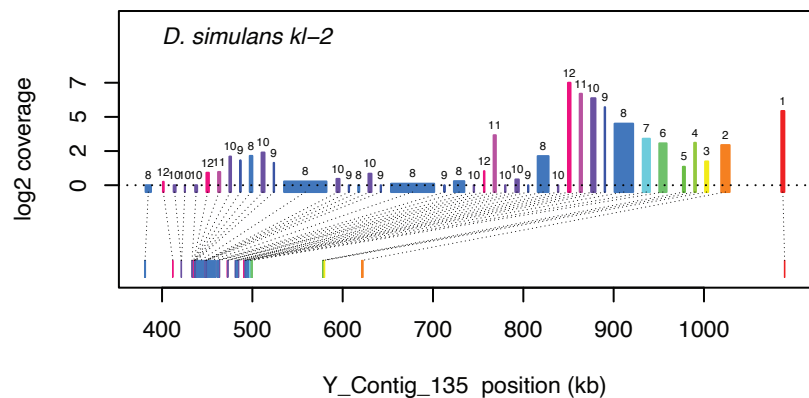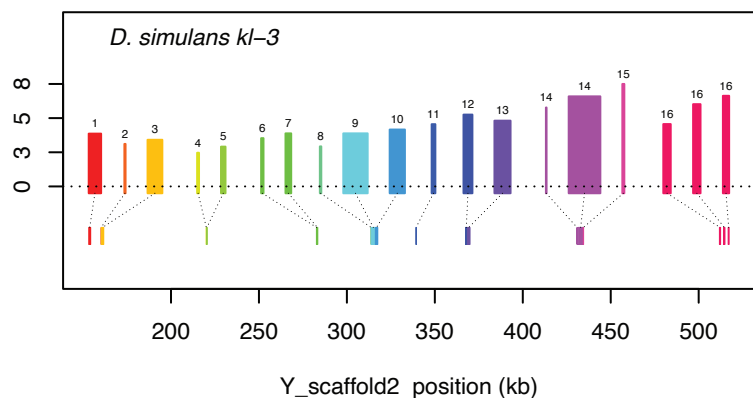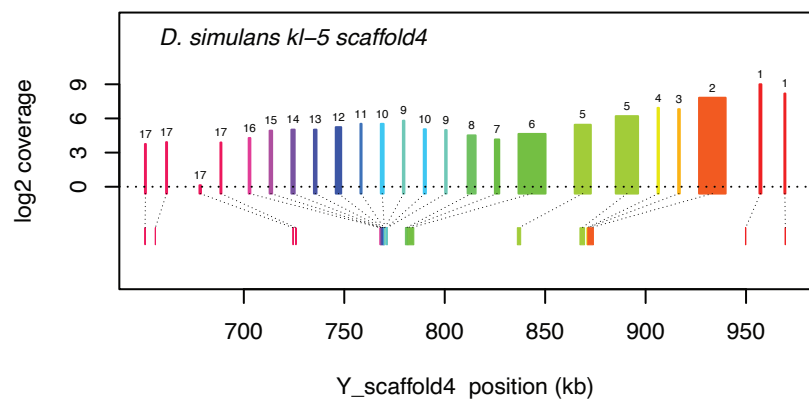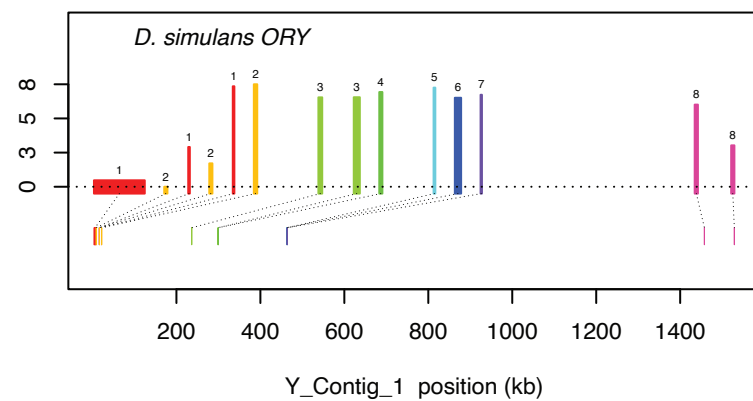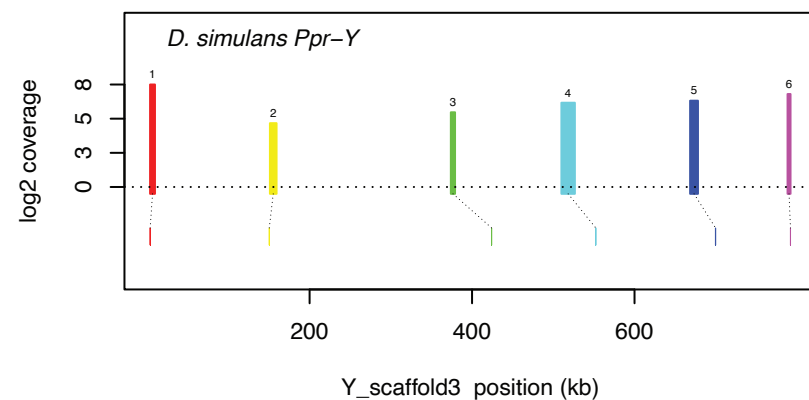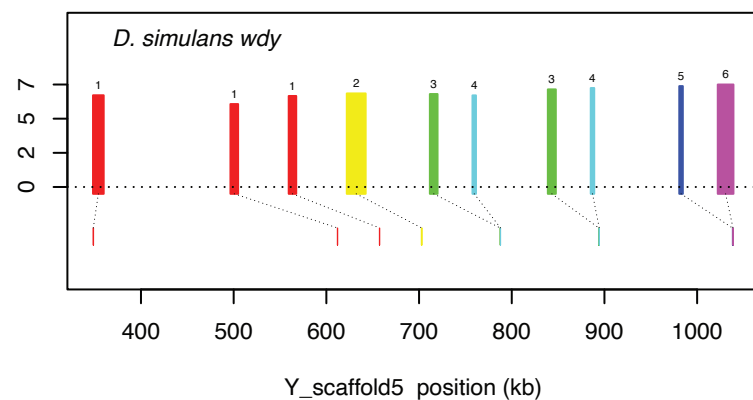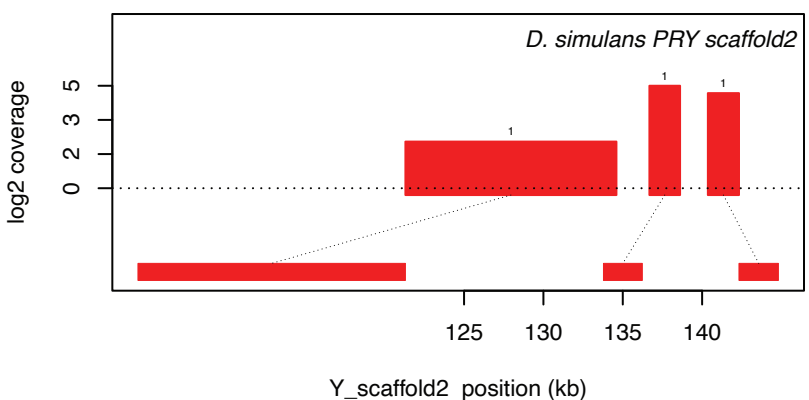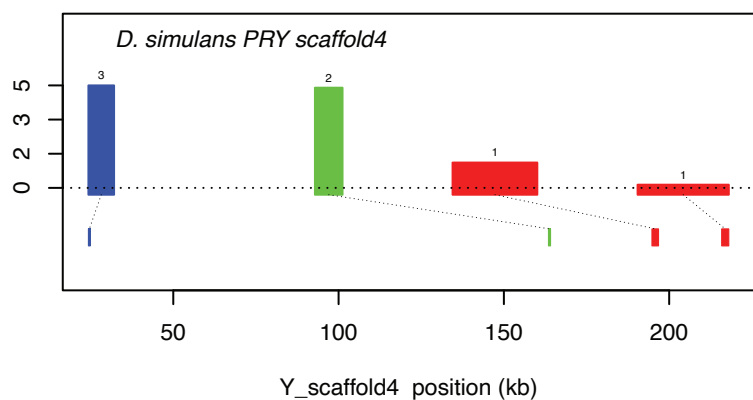

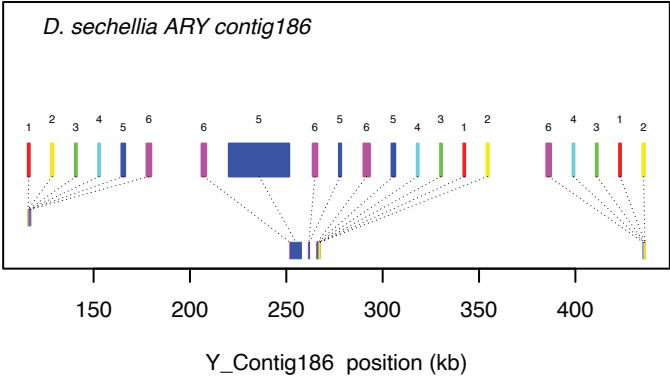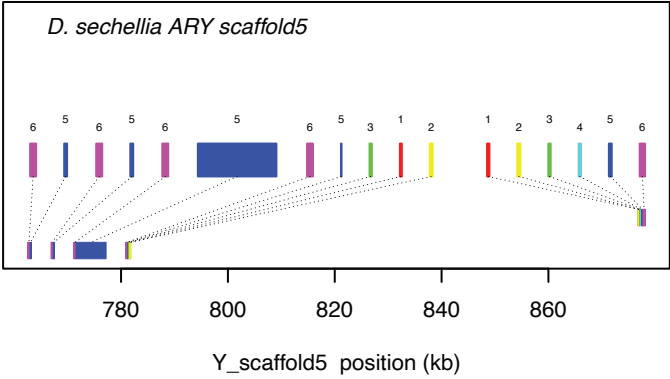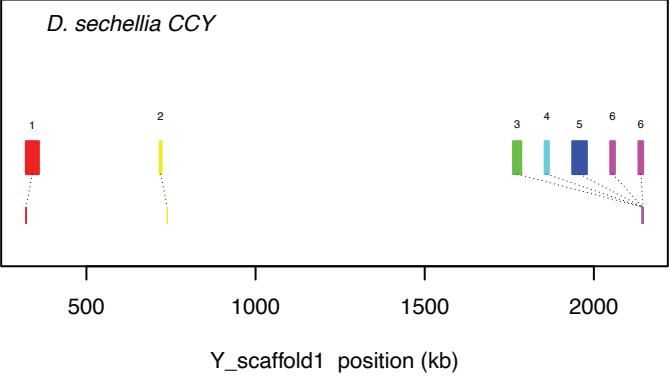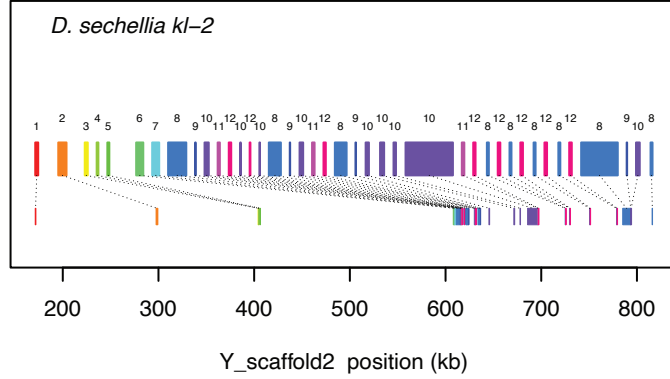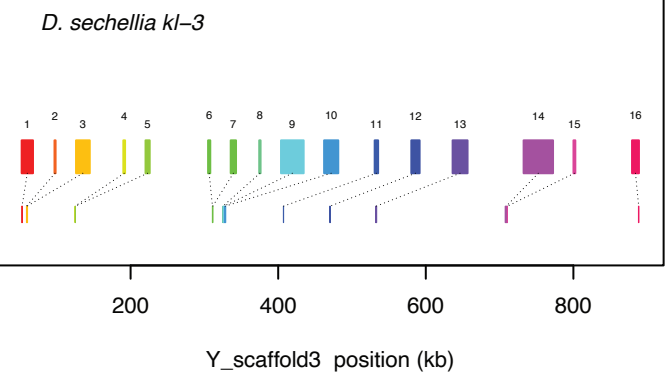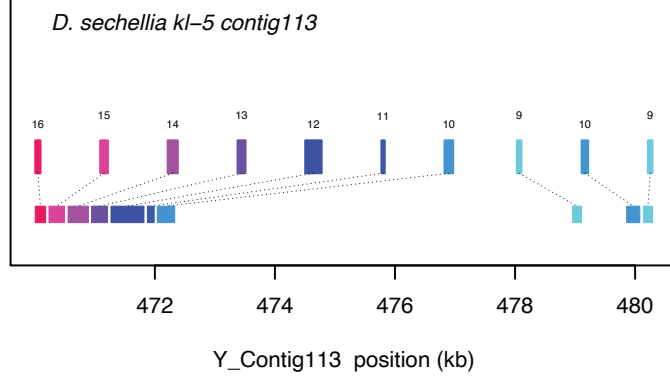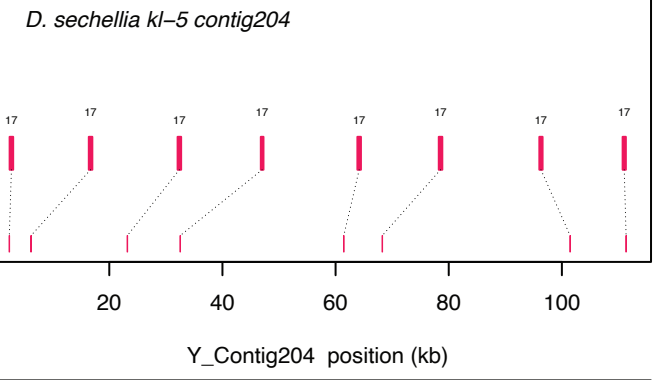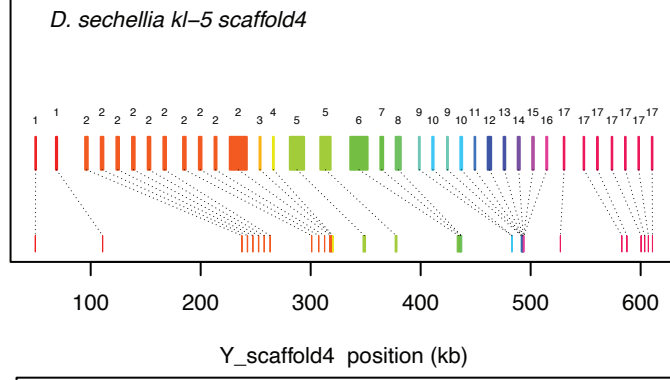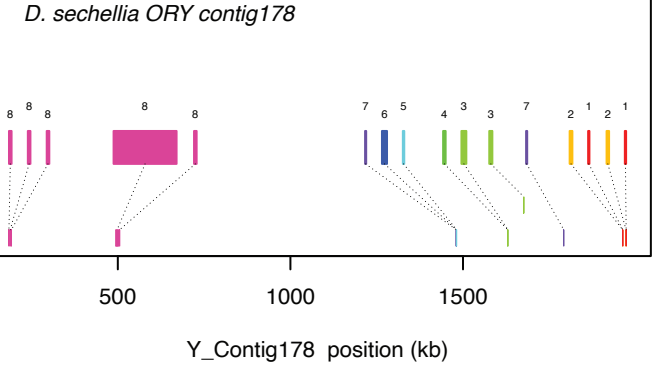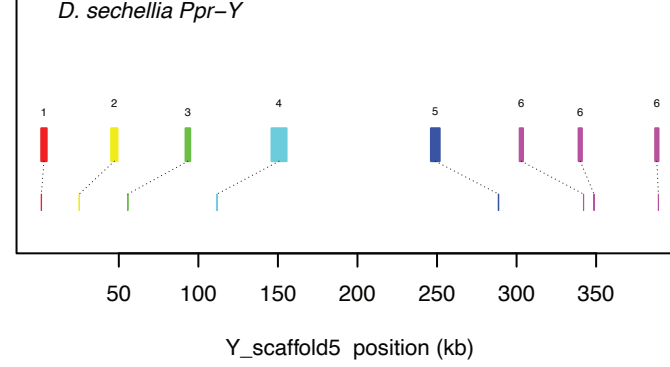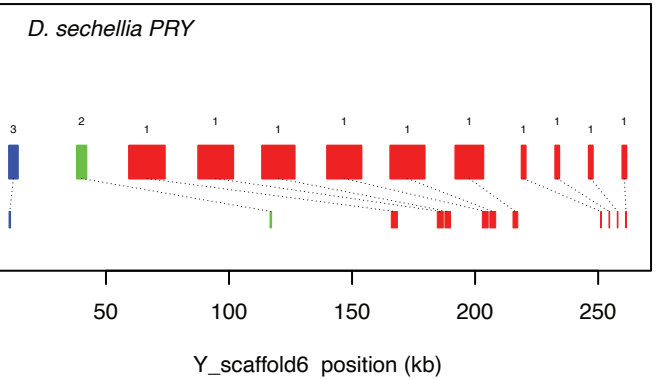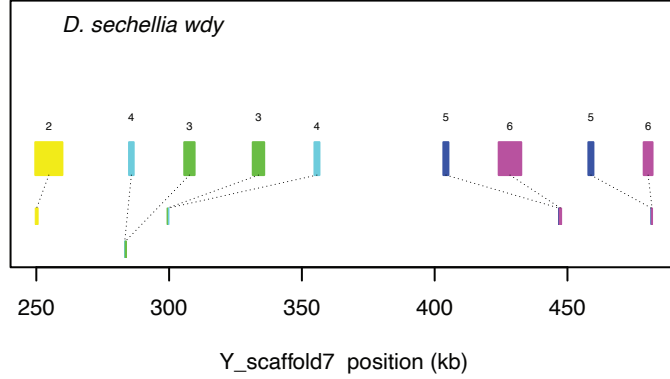

Supplement: supp [file elife-75795-supp-v1.zip]

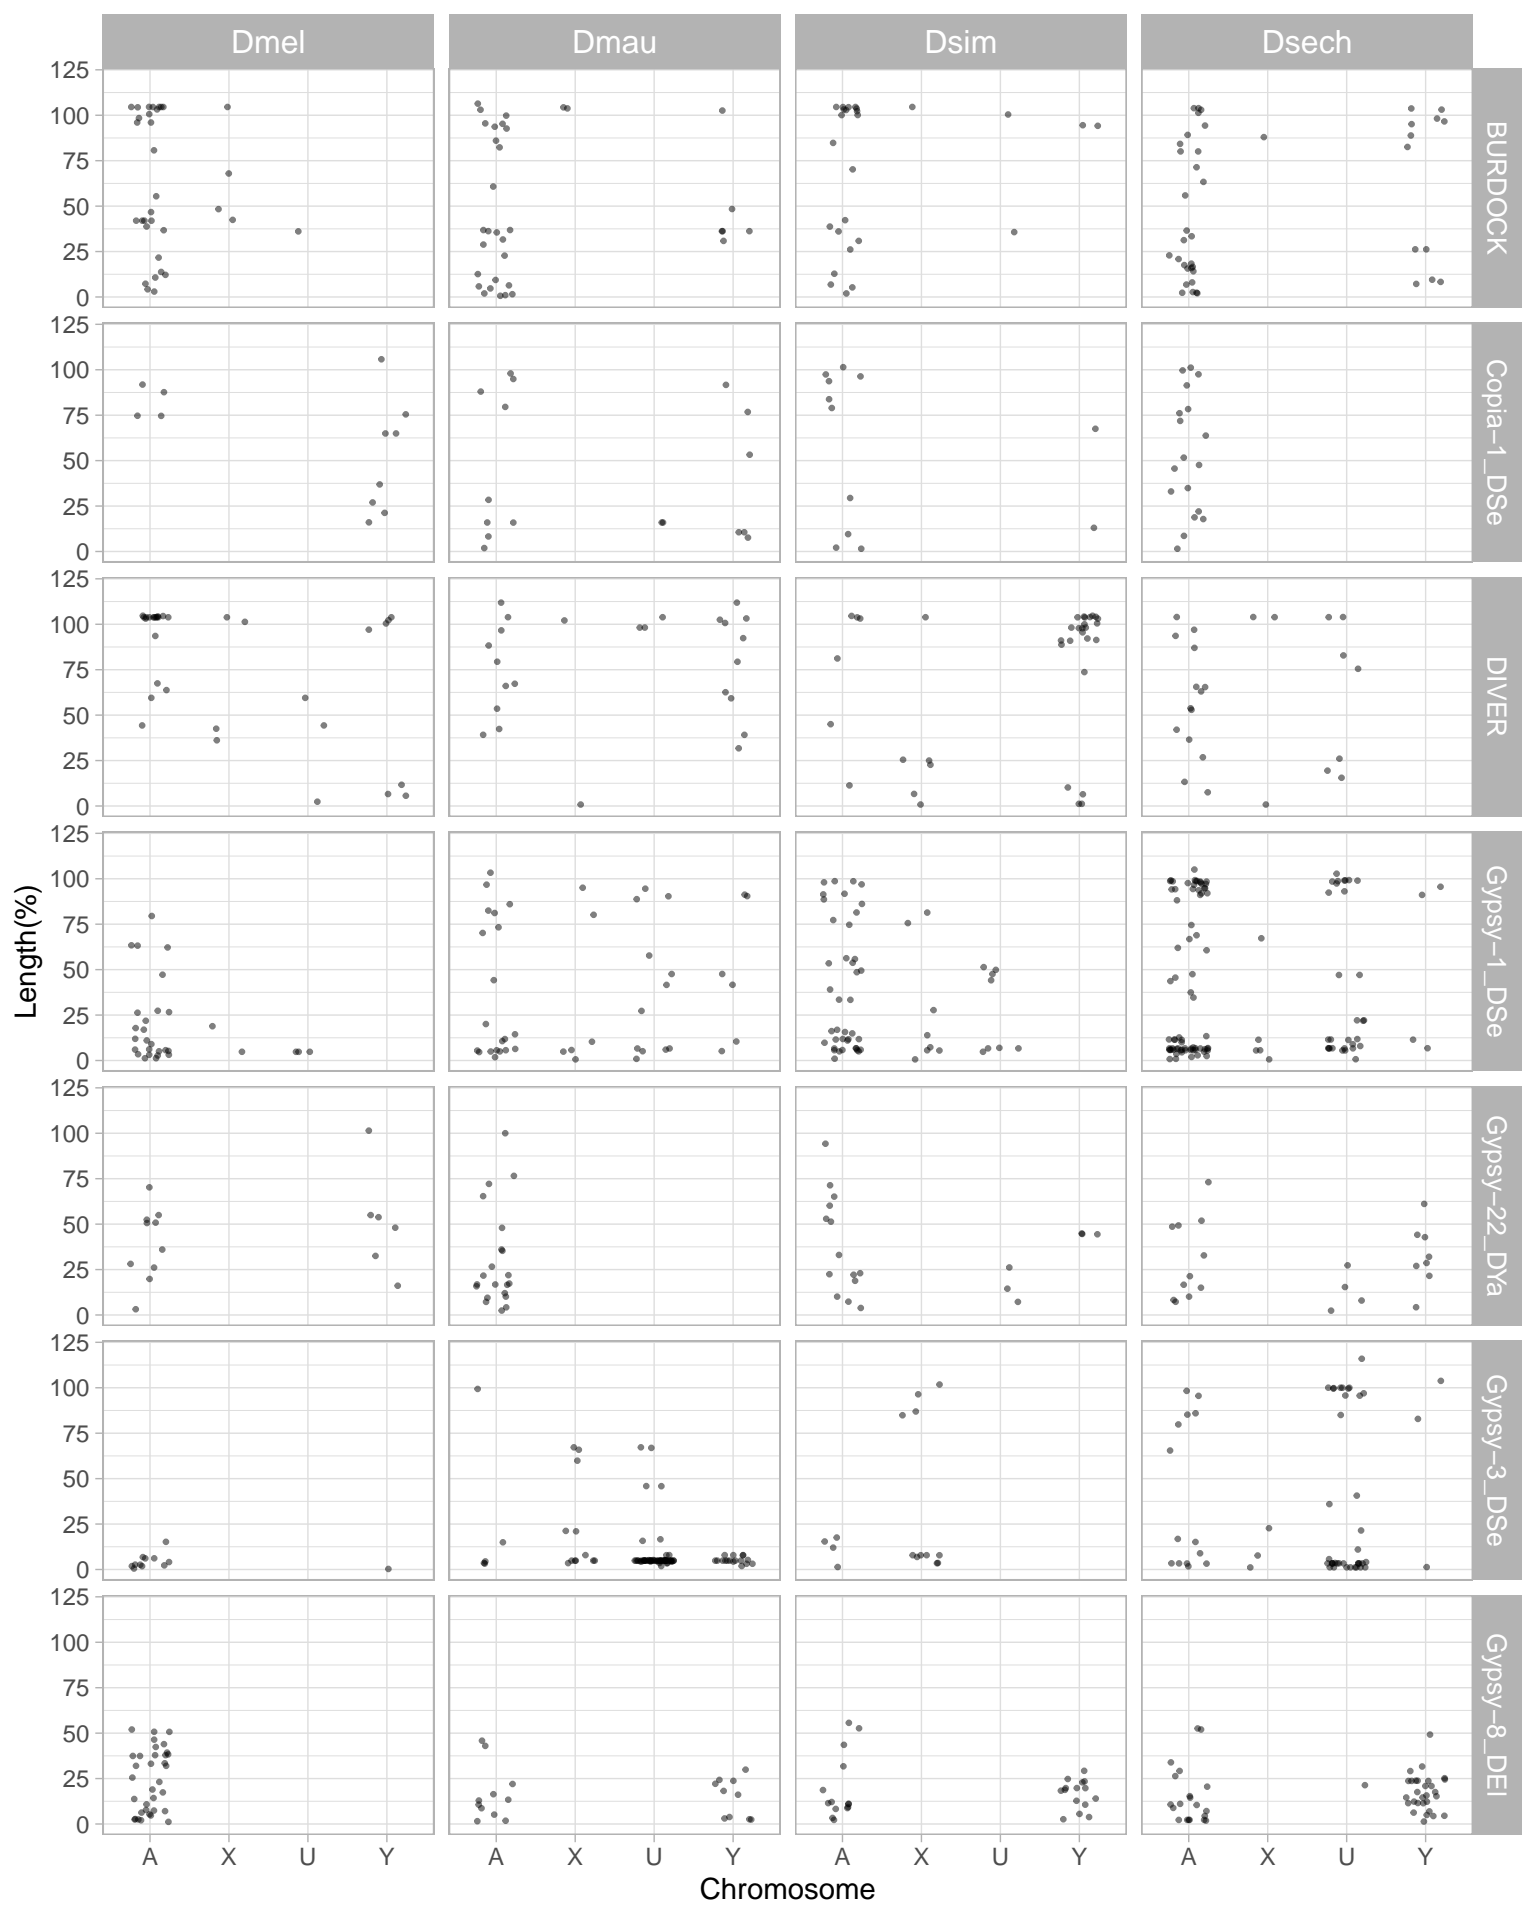

Supplement: supp [file elife-75795-supp-v1.zip]
